# Supplementary material
Source: ML conference proceedings conference paper supplement (https://proceedings.neurips.cc/paper_files/paper/2022/hash/6faf3b8ed0df532c14d0fc009e451b6d-Abstract.html)
Supplement: Supplementary file 1 [file 6faf3b8ed0df532c14d0fc009e451b6d-Supplemental-Conference.zip]

Archive with 11 entries (9 files):
- 7529_appendix.pdf
- codes/
- codes/dataset/
- codes/dataset/1912.txt
- codes/dataset/email-Eu-core.txt
- codes/dataset/Icon_
- codes/dataset/movies.csv
- codes/dataset/tweets.txt
- codes/dataset/wiki.txt
- codes/dataset/yelp_data.csv
- codes/knapsack_algorithms.py
