# Supplementary material
Source: ML conference proceedings conference paper supplement (https://proceedings.neurips.cc/paper_files/paper/2022/hash/6faf3b8ed0df532c14d0fc009e451b6d-Abstract.html)
Supplement: Supplementary file 1 [file 6faf3b8ed0df532c14d0fc009e451b6d-Supplemental-Conference.zip › codes/dataset/1912.txt]

2290 2363
2346 2025
2140 2428
2201 2506
2425 2557
2532 2073
2278 2551
2077 2369
1465 2592
2046 1941
2518 2132
2650 2207
2553 2078
2203 2143
2224 2510
2240 2563
2122 2118
1944 2117
2078 2611
2184 2354
2169 2283
2620 1998
2654 2646
2228 2082
1979 2484
1979 2257
2005 2560
1962 2206
2520 2104
2602 2521
2233 2200
2294 1981
2203 2187
1916 1945
2510 1959
1971 2184
2436 2042
2084 2532
2624 2184
2364 1991
1981 2110
2294 2029
2607 2654
2649 2087
2188 2477
2386 2543
2604 2561
2433 2122
2496 2153
2536 2482
2510 2512
2010 2224
2103 2253
2500 2063
2509 2399
2150 2030
2374 2551
1962 1986
2630 2376
2326 2561
2172 2140
2133 2296
2626 2097
2093 2391
2030 2257
2275 2118
1984 1979
1979 2347
2550 2207
2047 1932
2655 2347
1991 2097
1994 2292
2109 2040
2086 2602
1984 2460
2597 2282
2511 2598
2233 2638
2390 2096
2218 1917
2353 2625
2194 2289
2323 2218
2410 2631
2111 2062
2625 2059
1938 2060
1939 2062
1465 2264
2574 2579
2419 2491
2468 2615
2203 2597
2507 2564
2420 2347
1929 2154
1925 1979
1940 2169
2329 2275
1917 2154
2469 2564
2611 2229
2552 1993
2032 2511
2485 2410
2347 2419
2395 2339
1989 2084
2243 2434
2126 2283
2408 1986
2121 2140
2453 2214
2633 1991
2526 2059
2140 2430
1941 1964
2326 2064
2625 2323
2543 2407
2317 2412
2406 1964
2112 2404
2135 2292
2010 2498
2354 2257
2077 2500
1994 2302
2629 2351
2212 2123
2053 2254
2271 2410
2199 2054
2624 2520
2018 2636
2371 2166
2033 2140
2283 2608
2567 2042
2338 1954
2399 1916
2555 2138
2357 2152
2372 2189
2509 1945
2150 2532
2590 2359
2020 2103
2467 2266
2254 2289
2558 2375
1947 2432
2660 2640
2275 2550
1917 2347
2602 2468
2601 2069
2327 2597
1928 2018
2360 2156
2598 2101
2095 2560
2010 2125
2109 2124
2538 2447
2103 2104
2297 2659
2536 2323
2117 2592
2142 2110
2414 2615
2150 2324
2334 2428
2625 2615
2397 1978
2543 2429
2300 2429
2624 2606
2276 2554
1962 2376
2258 1929
2363 2331
1942 2584
2059 2374
2511 2143
2517 1964
2433 2103
2192 2364
2090 2340
2127 2543
1943 2586
2116 2365
2523 2158
1985 2271
2233 2258
2279 1948
2608 2111
2500 2560
2430 2290
1957 2648
2467 1946
2408 2376
2337 2538
2225 2016
2244 1929
2564 2348
2600 2593
2229 2056
2396 2432
1952 2458
2560 2489
1983 2477
2328 2394
2194 1994
2482 2460
1718 2282
2030 1984
2386 2601
2101 2333
2564 2172
1993 2446
1997 2172
1955 1920
2324 2074
2555 1926
2570 2397
2647 2435
2213 2154
1979 2464
2464 1983
2624 2124
1997 2348
2335 1960
2199 2333
2592 2392
2549 2172
2131 2309
2520 2172
2092 2140
1993 2165
1929 2549
2554 2607
2149 1947
2007 2445
2445 1945
2306 2290
2118 2043
2535 2126
2064 2492
2543 2606
1962 2414
2361 2371
1945 2280
2354 2619
2485 2172
2376 2030
2047 2385
2530 1913
2203 2328
2542 1986
2153 1994
2433 2536
2246 2002
2376 2123
2647 1972
2512 2242
2289 2416
1986 1917
2071 2102
2510 2616
2253 2655
2602 2326
2500 2376
2176 2267
2068 1577
2275 2370
2237 2560
2583 2378
1978 2503
2114 2260
2059 2307
1946 2347
2121 2625
2336 2347
2120 2105
1959 2161
2063 2287
2338 2529
2142 2520
2414 1966
2084 2467
2285 2247
2261 2504
1985 2482
2561 2347
2279 2496
2353 1979
2374 2495
2054 2280
2343 2336
2487 2245
2218 2500
1988 2466
1971 2482
2223 2653
1925 2339
1984 2244
2324 2164
2225 2472
2351 2241
2653 136
2451 136
2010 2282
2084 1925
1998 2050
2511 2347
2102 2196
2244 2237
2060 1984
2429 2063
2075 2501
2153 2047
2285 2007
2638 2278
2030 2495
2073 2309
2184 2131
2276 2423
2498 2187
2188 2464
2206 2309
2561 2244
2073 2561
2611 2359
2250 2180
2478 2058
2010 2183
2533 2047
2472 2153
2409 2104
2638 2428
2582 2377
2215 2068
2197 2236
136 2032
2499 2233
1960 2322
2365 2025
2187 1465
2324 2560
2376 2098
2533 2289
2446 2428
2615 2492
2418 2654
2381 2561
2600 2359
1947 2603
2071 2047
2600 2063
2644 2397
2131 2058
2417 2640
2446 2093
2104 2630
2625 1993
2633 1999
2220 2095
2578 2084
2240 2257
2069 2276
2414 2655
2045 1953
2630 2506
2553 1962
2567 2028
2054 2010
2556 2206
1979 2563
2191 2153
2109 2484
2235 2288
2149 2512
2109 1986
1917 2353
2040 2348
2254 1987
2111 2475
2340 2464
2271 2604
2336 2547
2319 2617
1914 2658
2045 2104
2436 2597
2163 2242
2495 2233
2434 2132
2430 2311
2597 2161
2607 2552
2196 2194
2005 2381
2043 2172
2095 2549
2188 2489
2052 2594
2201 2077
2326 2300
2273 2087
1972 2202
2468 2271
1940 2597
2555 2629
1991 1914
2377 2222
2241 1948
1922 2341
2363 2139
2131 2462
2324 2188
2591 2046
1718 2264
2371 2628
2059 2139
2133 2291
2643 2191
1920 2293
1975 1930
2334 2069
2506 2520
2220 2188
2084 2275
2511 2516
2201 2520
2090 2339
1993 2200
2192 2097
2057 2102
2620 2648
2297 2435
2046 2593
2302 2319
2446 2150
2133 2629
2468 2131
2533 2327
2220 2468
2264 2385
2615 2276
1983 2623
2071 2289
2359 1979
2552 2200
2164 2495
2319 2047
2500 2275
2018 2006
2366 2211
2542 2423
2030 2352
2607 2043
1938 2561
2386 2428
2615 2485
2484 2154
2427 2328
1934 2523
2500 2086
2397 1930
2482 2058
2363 1917
2299 2484
2326 2090
2122 2464
2206 2630
2608 2226
2561 2573
2598 2189
2059 1984
1923 2273
2500 2446
2299 2395
1979 2093
2555 2533
2575 2271
2381 1997
2276 2559
2359 2323
2032 2368
2642 2042
2466 2349
2365 1998
2638 2369
2359 2625
2477 2551
2030 2464
2299 2492
2451 1926
2654 2240
2086 2590
2604 2331
2191 2384
2447 2645
2319 2343
2210 2590
1943 2646
2200 2340
2159 2364
2424 2412
2000 2157
2498 2032
2446 2188
2244 2619
2201 2492
2591 2539
1943 2460
2593 2369
2374 2229
2657 1935
2600 2352
2313 2242
1962 2613
2324 2404
2335 2371
2356 2184
2608 1947
2047 2420
2111 2347
2108 2573
2246 2155
1948 2144
2054 2512
2212 2370
1941 1946
2643 1932
2460 1983
2607 2492
2123 1966
2043 2030
2542 2086
2169 1955
2543 2247
2275 2484
2420 1945
2189 2608
1921 2636
2353 2200
2072 2153
1953 2564
2289 2377
2461 2310
2465 2643
1984 2395
2625 2602
1984 2083
1955 2032
2095 2615
2324 2410
2430 2604
2108 2606
2363 2482
2112 2624
2194 2232
1919 1951
2655 2428
2549 2340
2026 2598
2250 1948
2069 2370
2340 2485
2250 2028
2630 2347
2603 1923
2499 2098
2155 2270
2011 1995
2639 2645
1975 1965
2078 2306
1995 2648
2273 2138
2347 2324
2563 1918
2150 2499
2208 2215
2556 2104
2602 2059
1941 2308
1931 1998
2243 2221
2202 2027
2081 1945
2609 1994
2218 1943
2038 1964
2556 2122
1946 2554
1964 2232
2153 2343
2048 2289
2465 2199
2308 2253
2155 2246
2331 2172
1941 2625
2404 2549
2604 2376
2376 2352
2038 2232
1962 2507
2597 2461
1925 1985
2570 2587
2032 2617
2578 2122
2067 2200
2161 2267
2560 2607
2150 1953
2549 1925
1954 2336
2337 2435
2492 2240
2104 2542
2086 2033
2638 2059
1962 2532
1959 1465
2297 1980
2592 2196
1917 2646
2551 1918
2185 2132
2331 2560
1984 2559
2071 2384
2020 2482
2351 1994
2563 2233
2138 2053
2247 2582
2339 2347
2118 2521
2028 2032
2083 2275
2381 2083
2537 2616
2038 2458
2103 2408
2126 2197
2657 2004
2410 2386
2315 2087
2002 1926
1914 2225
2308 2404
2560 2077
2573 2210
2638 2460
2600 2404
2132 2110
1971 2172
2249 2336
2495 2423
2147 2611
2218 2307
2547 2302
2126 1964
2142 2359
2324 2520
2235 2283
2502 2137
2491 2042
2532 2084
1917 2408
2362 1944
2169 2498
2293 2292
2290 2084
2078 2326
2278 2112
2553 2551
1966 2429
2537 2032
2555 1718
2504 1997
2642 2643
2464 2278
2462 2123
2398 2289
2462 2069
2038 2608
1983 2210
2598 2589
1954 2463
1928 1951
2121 2536
2187 2196
2655 2370
1987 2038
2188 2121
2399 2170
2264 2465
2370 2131
2370 2646
2417 2292
2489 2266
2479 2511
2134 2138
2115 2088
2271 2040
2498 2336
2324 2233
2244 1986
2563 2323
2331 2326
2033 2433
2390 2328
2333 2336
1923 2145
1943 2462
2266 2409
2174 2643
2220 2369
2546 1917
2601 2489
1917 2409
2344 2274
1577 2285
2223 2149
2327 2415
2229 2602
2385 2081
2484 2607
2308 2229
2257 2271
2399 2512
1917 2020
2374 2550
2124 2507
2215 2285
2561 2037
1577 2101
1943 2136
2631 2625
2613 2407
1935 1957
2006 1958
2253 2326
2586 2561
2611 2607
2486 2513
2271 2078
2471 2138
2430 2526
2369 2190
2376 2093
2064 2309
136 1995
2653 2292
2407 2253
2516 2241
1465 2338
2143 1994
2161 2282
1942 2206
2176 2224
2037 2559
2103 2526
2300 2423
2518 1923
2041 2456
2247 2610
2617 2246
2520 2526
2278 2043
2428 2601
2302 2530
2543 2384
1984 2542
2410 2552
2513 2401
2047 2609
2623 2590
1938 2020
2542 2408
2293 2347
2617 2471
2540 2197
1938 2112
2149 2198
2552 2430
2039 2053
2062 2394
2115 2376
1973 2127
1984 2200
2340 2546
2331 2549
2547 2372
2292 2385
2047 2525
2578 2606
2045 2300
2591 1938
2464 2244
2564 2407
2537 2128
2586 2638
2056 2033
2058 2370
2601 2233
2471 2643
2500 2090
2102 2054
2045 2646
2546 2220
2247 2072
1945 2384
2646 2257
1943 2606
2102 2215
2423 2078
2058 2526
1919 1998
2289 2474
2188 2299
2334 2615
2201 2551
2139 1929
2142 1938
2638 1938
2376 1962
2411 2228
2469 2339
2464 2033
2266 2088
2299 2433
2476 2103
2240 2212
2213 2446
2443 2088
2127 2458
2561 2374
2123 1993
2409 2354
1993 2646
2545 2147
2302 2547
1945 2338
2133 2246
2046 2124
2573 2276
2210 2567
2261 2543
2314 2335
2057 2445
2532 2306
2576 2391
2340 2521
2043 2058
2291 2318
2618 2361
2615 2506
2154 2088
2423 2046
2021 2560
2126 1933
2052 1947
2403 2618
1917 1984
2033 2573
2310 2226
2179 2073
2526 2276
2510 2149
2607 2433
2077 2602
2199 2052
2007 2031
2293 2047
2276 2290
2201 2607
1983 2408
2556 2469
2216 2655
1916 2368
1938 2395
2368 2533
2073 2601
2384 2054
2333 2110
1980 2050
2444 2486
2322 2473
2299 2579
2546 2539
2224 2491
2325 2087
2159 2202
2184 2090
2586 2172
2542 2468
2398 2038
2161 2338
2211 2176
2176 1954
2542 2090
2063 2188
1981 2062
2220 2418
2590 2543
2253 2386
2119 1975
2232 2566
2117 2205
2246 2081
2135 2111
2307 2655
2370 2352
2615 2539
2642 2226
2526 2200
2539 2218
2118 2275
2078 2347
2652 2294
2172 2356
2521 2088
2083 2212
2319 2289
2267 2264
2507 2369
2261 2574
2331 1966
2518 2598
2330 2174
1945 2330
2131 2423
1986 2619
2430 2206
2043 2112
1918 2604
2539 2520
2030 2276
2560 2567
2506 1983
2108 2348
2646 2150
2392 2376
2278 2352
2636 2378
2460 2172
2127 2445
2339 2060
2394 2117
2478 2429
2247 2434
2464 2233
2597 2368
2316 2178
2275 2339
2547 1947
2068 1926
2035 2049
2348 2104
2536 2069
2087 2283
2323 2030
2539 2179
2223 2268
2064 2467
2507 2095
2123 2542
2354 2240
1983 2179
2132 2598
2418 2083
2555 2071
2007 2475
2046 2309
2465 2332
2308 2213
2146 2152
2462 1971
1925 2579
2458 2420
2461 2117
2147 2383
2139 2409
2047 2138
2364 2011
2221 2062
2479 2054
1918 2299
2339 2306
2290 2020
2169 2302
2271 2381
2279 2471
1997 2088
1965 1964
2117 1964
2184 2033
2578 2218
2074 2275
2420 2153
2600 2020
1983 2237
2216 2140
2308 1943
2179 2103
2564 2376
1935 1921
2344 2509
2637 2540
2042 2135
2221 1970
1999 2633
2026 2510
2401 2093
2465 2138
2423 2500
2521 2124
2615 2045
2012 2171
2088 2324
2399 2511
2250 2071
2315 2183
2332 2372
1939 2247
2191 2347
2074 2601
2461 2302
2392 2560
2370 2423
2354 1917
2610 2416
2526 2638
2391 2625
2043 2395
2381 2460
1994 2039
2115 2363
2365 2143
2103 2300
2200 2460
2075 2081
2211 2209
2212 2339
2637 2416
2430 2348
2289 2191
2188 1971
2418 2495
2369 2046
2210 2104
2267 2224
1963 2578
2324 2359
2149 2436
2512 2169
2308 2429
2199 2273
2602 2460
2604 2404
2409 2139
2333 2042
2410 2591
2083 2404
2419 2328
2220 1989
2144 2555
2410 2131
2304 2355
2322 2038
2218 2334
2246 2149
2384 2148
1941 1994
2081 2062
2359 2063
2501 2222
2171 2025
1995 2636
2408 2607
2559 2200
2218 2056
2462 2257
2259 2471
2611 2334
2517 2066
2654 2564
1925 2495
2471 2461
2068 2598
2542 2615
2615 2354
2603 2451
2212 2625
2359 2064
2040 2258
2052 2151
2220 1985
2229 2393
2438 2537
2074 2216
2200 2309
2104 2586
1577 2268
2489 2059
2240 2433
1926 2007
2180 2282
1986 2414
2309 2418
2276 1993
2400 2128
2415 2434
2033 2407
2123 2216
2592 2223
2270 2031
2292 2125
2071 2250
2619 2142
1919 2097
2484 2467
2325 2232
2282 2047
2190 2615
2073 2257
2552 2088
1946 2323
1966 2454
2356 2561
2556 2615
2384 2187
2344 1916
2045 2408
1943 2150
2639 2284
2461 1926
2271 2300
1972 1935
2484 1979
1718 2510
1979 2340
2319 2567
2209 2525
1926 2002
2504 2630
2465 2609
2202 2365
2369 2309
2279 2567
2492 2619
2180 2338
2031 1944
2218 2575
2069 2073
2241 2292
2072 2589
2298 1577
2132 2002
2108 2590
2026 2475
2610 2031
2351 2116
2289 1954
2278 2206
1940 1954
2068 2511
2191 2653
2590 2154
2619 2348
2003 1952
2203 2268
2040 1989
1993 1925
2376 2469
2600 2340
2428 2184
2348 2103
1465 2510
2334 2311
2191 2642
1979 2578
2150 2359
2600 1941
2339 1966
1957 2626
1938 2324
1986 2323
2081 2304
2372 2294
2077 2073
1981 2509
1953 2477
2118 2578
2169 1959
2183 2071
2553 2240
2190 2624
2228 2114
1947 2438
2649 2295
1916 2125
2261 2560
2199 2111
2460 2139
2346 2378
2392 2646
2045 2033
2290 2059
2078 2408
2101 2438
2088 2201
2109 2602
2374 2579
2139 2369
2283 2649
2561 2526
2233 2386
2511 2652
2542 2233
2623 2430
2460 2104
2485 2593
1939 2652
2074 2546
2077 2064
1986 2122
2054 1718
2384 2502
1990 1922
2501 2458
2059 2477
2257 2150
2591 2352
2427 2071
2040 2409
2526 2037
2384 2511
2133 2474
2409 2591
2629 1577
2376 2423
2340 2414
2216 2429
2307 2500
2073 2150
2364 1935
2220 2084
2199 2385
1960 2659
2200 2030
2257 2064
2151 2582
2250 2149
2544 2145
2112 2504
2347 2292
2064 2593
2061 2645
2124 2520
2583 1919
2315 2187
1980 2640
1954 2128
1976 2472
2199 2649
2339 2654
2566 2226
2540 2313
2240 2573
2533 1941
2529 136
2659 1921
2229 2615
1927 2192
2655 1971
2240 2352
2328 1920
2090 2201
2366 2068
2331 2334
2460 2240
2055 2619
1938 2359
2509 2101
2220 2136
1923 2491
2004 2157
2123 1997
2043 2532
2350 2233
2344 2463
1941 2594
2544 2048
1947 2002
2198 2588
2124 2190
2302 2199
2037 2506
2056 2625
2419 2436
2624 2602
1925 2165
2336 2417
2404 2229
1941 2095
2118 2563
2658 1931
2347 2062
2654 2059
1945 2629
2216 2139
2116 2268
2652 1939
2558 2450
2078 2499
1925 2554
2268 2289
2271 2190
2004 2171
2576 2244
2604 2142
2573 2579
2563 2560
2458 2254
2333 2247
2592 2652
2247 2471
1966 2507
2069 2212
2555 2180
2086 2507
2369 2462
2574 2433
2240 2348
2643 2598
1945 2333
2395 2131
1989 1985
2260 2412
2098 1925
2477 1983
1960 2570
2469 2601
2600 2290
2320 1992
2446 2489
1993 2625
2174 2368
1979 2542
2318 2047
2323 1983
2039 2283
2400 2203
2087 2327
2279 2241
2601 2354
2116 2529
2111 2127
2334 2290
2093 2184
2116 2571
2030 2278
2276 2404
1993 2532
2329 2005
2332 2148
2151 2273
2292 2451
2043 2495
2116 2642
2553 2409
1913 2582
2250 1955
2307 2423
2495 2220
2598 2199
2040 2172
2592 2187
2430 2326
2414 1983
2458 2589
2543 2638
2492 1983
2234 2506
136 2225
2631 2206
2638 2307
2154 2492
2088 2539
2184 2638
2419 2589
1948 2196
2646 2086
2550 2059
2428 2073
2582 2102
2458 2547
2268 2038
2137 2351
2593 2095
2011 2639
2631 2142
2246 2183
2326 2564
2257 2559
2610 2355
2125 2502
2354 2103
2407 2323
2191 2597
2220 2030
2053 2057
2220 2306
2163 2111
2071 2315
2090 2229
2433 2043
2404 2387
1968 2585
2315 2543
1980 2346
2594 2319
2504 2326
2507 2601
1979 2391
2043 2624
2498 2054
2144 2224
1947 1926
2405 2162
2646 2418
2609 2567
2469 2123
2127 2498
2062 2132
2513 1992
2593 2602
2140 2409
2402 2035
2162 2238
2428 2218
2352 2190
2329 2468
2072 2101
2131 2506
1957 1927
2537 2052
2184 2604
2369 2306
2506 2607
2573 2240
2570 2089
2112 2172
2044 2387
1962 2482
2176 1945
2005 2430
1985 2386
2148 2282
2257 2093
2559 1962
2104 2464
2309 2084
2290 2037
2244 2625
2279 2491
2463 2128
2180 2053
2331 2088
2356 2122
2068 2002
2379 1945
2103 2040
2069 2393
2244 1918
2409 2489
2201 2478
2276 2244
2651 2222
2164 2109
2376 2271
2590 2504
2620 2284
2064 2521
2018 2009
2386 2307
2299 2121
2111 2285
2037 2210
1925 2374
2590 2619
2477 2200
2309 2307
2214 2289
1920 2135
2224 2053
2071 1981
2104 2124
2052 2463
2340 2532
1940 2102
2020 2090
2468 2578
1718 2283
1465 2247
2412 2587
2348 1997
1959 2351
2177 2252
2347 2407
2319 2330
2506 2059
1955 136
2049 2231
2049 2335
2332 2347
2414 2604
2338 2135
2076 2513
2469 2154
2086 2212
2183 2367
2408 2261
2264 2026
2428 2103
2359 2574
2090 2460
2149 2196
2199 2510
2271 2408
2478 2189
2294 2328
2056 2303
2351 2285
2526 2446
2319 2510
2404 2112
2351 2267
2205 1926
2464 2607
2084 1943
1972 2128
2455 2156
2081 2332
2509 2279
2353 2602
2057 2384
2134 2511
2058 2624
2304 1981
2639 2627
2359 2409
2043 1979
2257 2573
2044 2309
2138 2068
2564 2090
2604 2492
2250 2372
2180 2643
2131 2244
2533 2283
2423 2374
2414 2309
2148 2081
2038 2199
2370 1979
1914 2633
2229 2326
2433 2172
2124 2201
2638 2600
2283 2609
2328 2629
2267 2273
2647 2297
1926 2458
2086 2623
2506 2625
2567 2111
1918 2356
2220 2040
2138 2592
1979 1984
2294 2592
2574 1918
2489 2638
2206 2172
2407 2037
2149 2338
2176 2211
1943 2521
2244 1917
2381 2326
1946 2489
2088 2551
2276 2506
2250 2516
2154 2485
2648 2647
2372 2187
2334 2206
1943 2122
2499 2020
1962 2602
2590 1984
2232 2594
2136 1953
2191 2199
2266 2007
2104 2563
2047 2534
2130 2618
2174 2242
2550 2266
2625 2356
2209 2176
2039 2007
2111 1948
2506 2348
2397 2411
2591 2484
2542 2271
2416 2480
2071 2224
2531 2116
2417 2598
2594 2598
2273 2002
2639 1991
2608 2279
2322 2289
2032 2144
2546 2154
2428 2602
2154 1983
2247 2389
2593 2124
2404 2395
2218 2348
2520 2030
2478 2078
2077 2624
2501 2568
2199 2304
2352 2216
2626 2014
2309 2184
2030 2363
2446 2237
2526 1966
2086 2300
2327 2194
2240 1938
2143 2498
2128 2233
2244 2179
2335 2534
1963 2123
2304 2594
2187 2128
1966 2347
2192 2159
2118 2123
2428 2122
2184 2408
2549 2324
2404 1943
2607 2591
2593 2115
2475 1926
2563 2118
2512 1982
1718 2155
2131 2179
2072 2243
2504 2073
1980 2633
2645 2640
1965 2231
2241 2007
2257 2423
2436 2458
2030 2552
2307 2521
2299 2095
2200 2646
2004 2659
2184 2112
2330 2491
2171 2284
2409 2030
2560 2164
2180 2246
2199 2328
2196 2338
2637 2452
2628 2107
2339 2184
2645 2337
2247 2598
1972 2018
2123 2150
2055 2559
2084 1979
2615 2625
2142 2334
2587 2455
2616 2199
2283 2396
2550 2055
2124 2404
2311 2140
2638 2363
2543 2150
2408 2553
2297 2061
2026 2233
2468 2606
2539 2408
2340 2560
2239 2543
2407 2040
2525 2463
2273 2555
2315 1948
2003 1718
2594 2052
2240 2244
2169 2399
2045 2356
2492 2655
2229 2237
2289 2594
2579 2206
2222 2243
1921 2647
2398 2268
2142 2257
2408 2646
2319 2533
2045 1989
2471 2498
2331 2200
2385 2372
2381 2418
2131 2564
1925 2590
2191 2471
1918 2600
2088 2409
2200 2418
2319 2597
2369 2095
2276 2460
2055 2206
2040 2376
2588 2343
1946 2077
2071 2589
2418 2090
2123 2601
2407 2078
2007 2002
1577 2215
2507 2477
2031 2425
2602 2418
2332 2047
2047 2127
2392 2542
2379 2186
2621 2558
2253 2220
2642 2155
2069 2553
2091 2126
2500 2030
2573 2339
2304 2235
2467 2058
1981 2075
2395 2601
2638 2306
2435 2337
2088 2611
2111 2057
2378 2633
1958 2000
2460 2043
2428 2578
2154 2478
2045 2005
2550 2124
2289 2031
2352 2112
2256 1964
2214 2624
2192 2639
2642 2270
2009 2297
2602 2121
2022 2004
1926 2264
2102 2643
2366 2296
2508 2138
2495 2546
2551 2392
2140 2074
2240 2045
2103 1962
2510 2468
2278 2339
2069 1938
2030 2184
1971 2142
2059 2363
2414 2212
2510 2081
2507 2433
2557 2155
2351 2187
2124 2611
2171 1958
2147 2007
2123 2257
2293 1577
2098 2395
2165 2560
1957 2284
2601 1938
1994 2512
2257 2030
2292 2032
2194 2180
2588 2174
2510 2598
2030 2140
2579 2575
1937 2357
2235 2254
2495 2005
1985 1993
2059 1962
2578 2063
2467 2069
2095 2381
1985 2090
2319 2445
2266 2575
2267 2463
2473 2111
2507 1962
2343 2081
2124 2542
2600 2469
2098 2492
2583 2435
2464 1993
2588 2199
2150 2306
1916 2174
2567 2138
2516 2343
1939 2052
2142 2150
2190 2220
2313 2632
2601 2104
2543 2600
2254 2010
2271 2139
2429 2623
1970 2605
2586 2386
2179 2381
2469 2359
2418 2108
2398 2567
2142 2220
2398 2328
2512 2478
2022 2447
2507 2058
2149 2603
2220 2118
2128 2052
2247 2498
2652 1959
2657 1972
2377 2174
2458 2333
2268 2547
1958 2061
2509 2390
2093 2386
2218 2600
2356 2578
2290 2433
2551 2020
2054 2222
2597 2551
2059 2098
1943 2348
2428 2124
2319 2241
136 2417
2564 2093
2213 2073
2468 2572
2142 2521
2329 2063
2309 2142
2542 2326
1983 2123
1921 2009
2319 2302
2369 2604
2645 2061
2299 2619
1965 2289
2551 2654
2192 2000
2233 2573
2484 1985
2275 1941
2564 2323
2384 2199
2140 2069
2095 1929
2550 2077
2603 2128
2624 2142
2654 2118
2507 2559
2416 2641
2445 2511
2419 2196
2111 2436
2551 2005
2522 2151
2068 2582
2623 2077
2376 2485
2276 2229
2201 2340
1918 2573
2026 2607
2236 2371
2139 2059
2654 2150
2374 2300
2642 2296
2579 2601
2308 2410
2625 2307
2627 2297
2528 2439
2436 1718
2290 2210
2004 2016
2093 2150
2601 2654
2491 2597
2467 2615
2463 2330
2384 2465
2257 2507
2391 2064
2064 2233
2339 1979
2516 2567
2028 2196
2257 2542
2176 2052
2159 2027
2555 2032
2186 1926
1938 2386
2612 2047
2035 1964
2578 2086
1983 2063
2392 2229
2169 2289
2404 2331
2464 2353
2028 2502
2347 2093
2092 2189
2101 2282
2507 1966
2448 2289
1946 2139
2220 2290
1929 2164
2190 2607
2592 2117
1957 1950
2240 2206
2602 2654
2331 1946
2283 2642
2564 2414
1966 2276
2136 2409
2282 2243
2653 2283
2555 2267
2194 2102
1939 2368
1923 2493
1947 2368
2088 2575
2356 2579
2198 2002
2372 2102
2587 2181
2004 2658
2309 2574
2564 2593
2591 2103
2282 2224
2087 2196
2328 2132
1984 1993
2124 2591
2598 2135
2250 1959
2112 2348
2630 2278
2404 2600
2086 2408
2192 2659
2624 2213
2247 2347
2010 2344
2340 2093
2231 2152
2598 1920
2293 2567
1966 1943
2479 2394
2194 2283
2222 2333
2629 2293
2414 1989
1959 2394
2339 2615
2378 2346
2038 2416
1929 2556
2556 2630
2624 2069
2370 2229
2354 2329
2588 2282
2532 2495
2544 2436
2464 2220
1932 2138
2604 2037
1577 2384
2058 2121
2555 1948
2033 2324
2330 2135
2101 2594
2615 2428
2471 2247
2602 2229
1976 2024
1962 2590
2308 2374
2423 2084
2081 2649
2395 2370
2369 2408
2555 2002
1994 2042
2308 2446
2604 2212
2629 2111
2579 2218
2109 1918
2226 2501
2347 2623
2122 2206
2465 2302
2492 2601
2001 1927
2344 2153
2405 1990
2201 2655
2430 2308
2026 2526
2154 2073
2598 2555
2287 2104
1925 2409
2659 1935
2336 2616
2123 2124
2124 2088
2138 2629
2006 2284
2121 1963
2189 2436
2222 2221
2340 2142
2597 2028
2267 2232
2215 2102
1577 2028
2539 2625
2223 2336
2354 2542
2609 2053
2408 1979
2192 2585
2009 1954
2433 2546
2202 2061
2448 2217
2054 2002
2539 1984
2003 1939
2271 2059
1985 2484
2576 2147
2607 1941
1955 2419
2184 2056
2302 2203
2374 2212
2526 2520
1946 2165
2329 2460
2261 2551
2000 2636
1969 2302
2229 2507
2521 2408
2396 2161
1925 2507
2649 2582
2002 2461
2526 2188
2307 2121
2377 2110
2606 1989
2140 2121
2351 1945
1984 2213
1985 2462
2625 2206
1986 2069
2095 2266
2149 2293
2060 2046
1979 2359
2250 2102
2414 2386
2212 1918
2497 2474
2499 1984
2153 2039
2271 2631
2507 2492
2196 1920
2275 2563
1932 2338
2500 2600
2203 2250
2159 1927
2625 2188
2279 2187
2174 2612
2078 2654
2436 2007
2111 2588
2322 2228
2112 2631
2329 2055
2035 2448
1986 2257
2629 2047
2074 2359
2611 2271
1953 1943
2356 2543
2347 2257
2005 2063
2340 2492
2556 1986
2047 2465
2005 2507
2377 2153
1986 2275
1943 2124
2601 1917
2054 2501
2402 2228
1959 2434
2302 2039
2323 2554
2197 1960
2649 2368
2115 2638
2617 2243
1985 2086
2054 2518
2279 2345
2561 2142
2472 2351
2150 2430
2384 2451
2586 2624
2206 2654
2354 2654
2578 2631
2280 2232
2560 2121
2017 2321
2102 2616
1943 2549
2362 2419
2229 2124
2594 2537
2040 2290
2585 1998
2563 2078
1932 2002
2241 2174
2199 2420
2216 1989
2103 2601
2187 2143
2102 2282
2196 2330
2593 2446
2471 2028
2183 2153
2073 2607
2428 2469
2602 2040
2307 2278
2150 2418
2559 2590
2649 2516
2150 2307
2001 2284
2459 2620
2250 2616
2343 2007
2056 2359
2428 2056
2095 2363
2054 2283
2611 2331
2338 2292
2154 2278
1973 1921
2376 2391
2542 2308
1925 2275
2429 2308
2561 2218
2438 2280
2653 2007
2138 2344
1943 2020
2268 2057
2319 1985
2077 2593
1971 2464
2542 2275
2183 2529
2203 2598
2233 1962
2031 2514
2237 2467
2328 2509
2326 2206
2179 2363
1984 2354
2098 2164
2654 2604
2220 2561
2378 1951
2309 2560
2543 2232
2620 1935
2112 2414
1946 2078
1917 1938
2138 2328
2500 2546
2444 2170
2190 2257
2628 2618
1971 2430
2336 2127
2037 2356
2646 2059
2039 2135
2191 2196
2352 2550
2520 2020
2643 2032
2002 1577
2588 2463
2246 2151
2363 2600
2620 2025
2043 2460
2020 2059
2287 2229
2127 2555
1966 2040
2410 2549
2142 2554
1946 2631
2331 2078
1983 2404
2149 2351
2586 2623
2143 2009
2135 1920
2093 2554
2369 2056
2261 2347
2073 2266
2326 2190
2174 2224
2003 2501
2509 1926
1921 2658
2356 2573
2073 2549
2418 2275
2156 2162
2038 2343
2196 2598
2598 2643
2108 2504
1946 2040
2590 2532
2460 2123
2590 2112
2461 2196
2296 2226
2090 2363
2646 2124
2475 2241
2433 1979
2033 2423
2414 2278
2069 2482
2261 2485
2562 2107
2247 2491
2212 2554
2063 2123
2181 2562
2060 2037
2246 2199
2611 2139
2401 2466
2033 2237
2104 2485
2200 2123
2598 1939
2654 1997
2146 2107
2624 2093
2465 2567
2594 2473
2430 2561
2153 2419
2224 2616
1945 2169
2326 2059
2482 1993
2478 2427
2045 2624
2340 2218
1938 2340
2261 2604
2190 2625
1959 2347
1943 2428
2398 1955
2039 2254
1954 2365
2354 2429
2384 2304
2469 2084
2323 2299
2589 2267
2531 2459
2123 2646
2586 2354
1465 2496
2043 2591
2282 2149
2370 2464
2554 2088
2506 2005
2581 2610
2326 2520
1918 2093
2586 1929
2020 1918
1947 2637
2601 1997
2418 2086
2038 1926
2247 2592
2032 2246
2083 2172
1953 2485
2414 2526
2356 2150
2394 2280
2630 2543
2234 2386
2063 2356
2216 2578
2410 2590
2142 2591
2019 2478
2150 2266
2040 2507
2591 2095
2224 2028
2392 2556
2174 2292
2425 2416
2161 1926
1927 2364
2363 2586
2463 2174
2396 2053
1989 2369
2369 2532
2549 2348
2037 2136
2284 2659
2212 2200
2510 2174
1986 2374
2299 2630
2464 2543
2165 2090
2433 2563
2209 2425
2047 2126
2579 2573
2625 2299
2575 2073
2155 2310
2132 2327
2062 2598
2275 1962
2217 2375
1916 2598
2564 2611
2241 2285
2184 2560
1962 2184
2591 2602
2339 2586
2611 2619
2257 2086
2464 2500
1943 2046
2106 2421
2042 2510
2212 2179
1985 2556
1966 2218
2559 2356
2459 2009
2289 2141
2043 2216
2136 2354
2043 2150
2543 2506
1987 2215
2212 2500
2084 2449
2507 2184
2295 2148
2624 2200
2112 2386
2645 1951
2410 2258
2032 2289
2123 2492
2072 2508
2602 2261
2625 2606
2433 2499
1948 1959
2543 2071
2463 2377
1953 2261
1919 2645
2103 1993
1989 2045
2213 1979
2201 2500
2216 2593
2213 2553
1914 1927
2191 2649
2615 2655
1958 2626
2574 2271
1985 2542
2520 2069
2352 2554
2438 2377
2463 1577
2190 1966
1940 1920
2475 2032
2132 2419
1954 2024
2308 2539
1993 2556
2574 2030
2469 2030
2588 2002
2282 2117
2313 2621
2020 2165
2239 2247
2447 2585
2549 2386
1940 2194
2504 2363
2200 2542
2165 2574
1955 2319
2352 2331
2334 2253
2602 2363
2646 2306
2125 2153
2329 1979
2115 2278
2142 2376
2564 2563
2123 2179
2573 2615
2244 1966
2063 2290
2075 2054
2268 2117
2081 2396
2279 2038
2292 2582
2520 2103
2199 2187
2555 2223
2440 2049
2218 2574
1962 2213
2129 2448
2333 2530
2222 2651
136 2494
2309 2554
2169 2347
2300 2543
2049 2082
2339 2200
2604 2464
2013 2009
2153 2223
2446 2040
2102 2400
2111 1577
2046 1918
2423 2240
2354 2428
2575 2539
2279 2643
1925 2553
2143 2199
2504 2200
2356 1983
2200 2150
2203 2461
1954 2224
2604 2021
2464 2121
2574 2165
2118 2624
1917 2064
2476 1966
2233 2546
1993 2554
1917 2261
2172 2376
2376 2564
2615 2112
2586 2593
1577 2616
2649 2475
1981 2243
2271 2063
2071 2223
2646 2334
2133 2203
1718 2189
2153 2111
2589 2183
2059 2607
2521 2323
2104 2074
2276 2462
2183 2053
2339 2043
2109 2331
1984 2140
2181 2126
2102 2529
2139 2539
2518 2480
2463 2399
2374 2200
2103 2602
2356 2575
2187 2247
2506 2278
2339 2556
2009 1976
2377 2399
2392 1979
2465 2588
2047 2137
2055 2216
2364 1927
2122 2179
2603 2327
2047 2612
2246 2543
2138 2642
1943 2339
2138 1987
2073 2077
2520 2404
2561 2576
2630 2604
2581 1987
2462 2604
2234 2334
2086 2253
2006 2657
2326 2078
2642 2052
2615 1983
2521 2122
2332 2187
2200 2073
2190 2033
2344 2475
2087 2332
2602 2150
2586 2340
2607 1962
2176 2111
2309 2433
2410 2526
2266 1997
1971 2306
2246 2389
2099 2052
1959 2438
2266 2638
2611 2625
2603 2125
1964 2197
1979 2104
2003 2396
2543 1939
2627 2365
2123 2300
2489 2118
1986 2542
2061 2171
2098 2069
2254 2038
1941 2165
2198 2516
2547 1920
2344 2053
2399 1981
2601 2142
2220 2339
2410 1979
2381 2526
2306 2542
2311 2526
2408 2142
2095 2290
2104 2655
2018 1973
2602 2348
1966 1986
2056 2593
2611 2549
2606 2376
2047 2223
2449 2339
2053 2396
2122 2624
2329 2220
2485 2179
2461 2643
1917 2579
2615 2093
2075 2603
2196 2282
2069 2308
1962 2033
2498 2344
2333 2259
1993 2428
2607 2139
2222 2617
2020 2352
2206 2410
2250 2289
2266 2604
2268 2187
2643 2465
2560 2142
2090 2306
2176 2203
2324 1938
2421 2106
2601 2059
2184 2446
2340 2271
2103 2464
2112 2229
2151 1948
2346 2585
1945 1916
2191 2039
2196 2134
2292 2294
2372 2283
2273 2028
2376 2370
2542 2398
2464 2600
2377 2509
2423 2005
2511 2282
2598 1940
2063 2033
2396 1947
2492 2331
2127 2471
2624 2291
2276 2271
2340 2045
2134 2039
2506 2233
2660 1995
2218 2593
2445 2187
1983 2414
1917 2354
2473 2296
2200 2407
2491 2068
2500 2359
2211 1977
2607 2206
2591 2073
2640 2297
2510 2594
2240 2552
2169 2250
2396 2243
2563 2104
2566 2047
2102 2543
2428 2257
2143 2597
2180 2047
2247 2111
2654 2078
2276 2309
2462 2037
2461 2510
1920 1577
2007 2649
2655 2323
1932 2653
1918 2115
2109 2184
2160 2251
2266 2339
2526 2005
2331 2624
2395 2446
2112 2121
2597 2555
2619 1917
2410 2607
2430 2275
2609 2191
2125 2289
1947 2582
2302 2111
2543 2369
2302 2032
1947 2415
2344 2032
2271 1997
2090 2275
2482 1938
2074 2063
2027 1921
2150 2410
1931 1972
1984 2543
2504 1989
2118 2212
2136 2467
2131 2410
2449 2084
2257 2090
2112 2655
2074 2030
2396 2132
2187 2394
2484 2625
1938 2369
2550 2229
2423 2037
2302 2429
2501 2617
2593 2108
2578 2326
1966 2561
2222 2568
2363 2220
2183 2589
2578 2370
2624 1979
2273 2509
1926 2384
2131 2554
2188 2428
2468 2586
2556 2586
2485 2200
2179 2172
2619 2043
2216 2624
2471 2592
2624 2638
2030 2037
2559 2600
2090 2078
1935 2636
1972 2001
2516 2582
1971 2606
2032 2367
2602 2093
2184 2084
2625 2353
2594 2047
2300 2590
1955 2053
2192 1931
2511 1981
2371 2286
2324 2121
2458 2199
2384 2183
2145 1934
2327 2189
2574 1997
2559 2064
2064 2200
2275 2460
1929 2090
2250 2471
2636 1995
1945 2543
2309 2323
2521 2220
2088 2484
2240 2536
2340 2069
2359 2275
2521 2237
2063 2074
2058 2429
2323 2601
2090 2040
2279 2199
2506 1986
2125 2594
2196 2597
2630 1986
1918 2553
2553 2201
2206 2404
2247 2594
2009 2472
2559 2331
2111 2572
2347 2329
2266 2630
2199 2572
2084 2165
2356 2546
2655 2638
2464 1979
2183 2338
2235 2176
2575 2604
2554 2218
2128 2087
2131 1986
2615 2521
2289 2247
2335 1990
2597 2609
2654 1938
2027 2657
2353 2414
1938 2418
2340 2601
1925 2611
2283 1718
2180 2385
1935 1954
2409 2485
1985 2047
2655 2359
2273 2176
1465 2087
2150 2468
2350 2172
1929 2323
2414 2348
2109 2574
2504 2266
1947 1718
2594 2111
2102 2268
2072 2537
2054 1981
2156 2577
2116 2351
2317 2360
2210 2216
2064 2172
2062 2344
2068 2047
2344 2519
2123 2088
1963 2460
2247 2099
2290 2184
1941 2586
2328 2125
2134 2117
2190 2046
2118 2460
2282 2434
2540 1964
2090 2278
2005 2278
2135 2153
2370 2020
2534 2313
2047 2128
2616 1916
2319 2187
2073 2331
2074 2139
2190 2467
2110 2142
2087 2377
2631 2454
2397 2448
2086 2464
2010 2642
2578 2550
2474 2644
2549 1917
2322 2366
2154 2404
2532 2271
2020 2586
2414 2179
2343 2598
2478 2576
2103 2578
2446 2526
1917 2108
2615 2216
2326 2088
2615 2418
1945 2302
2542 2112
2521 2139
2315 1465
2552 1979
2111 2223
2216 2037
2271 2229
2153 1577
2551 2586
2112 2271
2372 2007
2199 1718
2294 2289
2428 2600
2176 2325
2022 1972
2552 1929
1979 2179
1983 2369
2428 2098
2059 2354
2485 2240
2253 2482
2233 2216
2052 2241
2600 2590
2324 2123
2543 2279
136 2364
2241 1939
2093 2549
1577 2187
2216 2467
2187 2384
2031 2557
2396 2294
2124 2172
2286 2534
1919 2016
2624 2646
2108 2601
2624 2122
2617 2279
2124 2521
2601 2462
2035 1936
2615 2363
2601 2370
2376 2536
1999 2284
2102 2133
2462 2611
1993 2467
2475 1939
2554 2546
2636 2647
2216 2086
2393 2092
2629 2292
1946 2578
2356 2218
1997 2404
2191 2598
2575 2216
2157 2378
1963 2604
2139 2108
2323 2154
2657 1921
2127 2389
1983 2308
2590 2098
2646 2370
2550 2189
2090 1943
2009 2157
2108 2220
2138 2087
2250 2413
2384 2417
2353 2543
2351 2332
2153 2491
2381 2190
2630 2600
2220 2591
2510 2332
2290 2469
2144 2436
2432 2294
2123 2623
2065 2081
2090 1917
2056 2356
2299 2340
2174 2327
2279 2028
2121 2206
2560 2374
2163 2183
2460 2556
2005 1941
1965 2313
2084 2374
2446 2579
2063 2201
2616 2174
2045 2602
2043 2109
2340 2655
2465 2599
2429 2244
2210 2306
2142 2278
2331 2309
2559 2504
2103 2179
2328 2280
2150 2631
2446 2655
2607 2482
2279 2338
2040 2275
2122 1963
2368 1718
2287 2593
2491 2174
2257 2429
2038 1718
2485 1946
2283 1947
2142 1989
2339 2240
2463 2547
2188 2339
2395 2240
2315 2372
2275 2078
2216 2383
1985 2630
2521 2213
2244 2123
2030 2546
2477 2136
2179 2352
2343 2191
2502 1577
2290 2308
2338 2087
2617 2501
2461 2153
2409 2551
2471 2111
2351 2224
2169 2247
2468 2482
2223 2243
2037 2300
2180 1932
2189 2511
2550 2418
2046 2356
2490 2320
2084 2103
1946 2376
2409 2108
2551 2220
2623 2118
1980 2001
2042 1959
2521 2340
2088 2112
1973 2640
2446 2590
2340 2190
2040 2069
2553 2083
2492 2429
2327 2148
1917 2334
2179 1983
2011 2657
2282 2653
2447 2004
2132 1981
2078 2266
2361 1965
2194 2643
2339 2104
2128 2183
2233 2334
2018 2268
2418 2611
2408 2115
2404 2428
2654 2549
1984 2654
2540 2525
2253 2586
2625 2150
2184 2559
2550 2220
2334 2539
1918 2386
2575 2625
2578 2064
2414 2601
2553 2573
2414 2261
2603 2438
2398 2490
1995 1972
2536 2576
2510 2180
2220 2613
1935 1972
2006 2171
2368 2283
2602 2043
1917 1979
2038 2302
2093 2287
2356 2492
2329 1918
2623 2030
2172 2564
2059 2179
2462 2065
2352 2172
2157 1951
2278 2504
2428 2060
1985 2300
2323 2586
1951 2648
2310 2325
2127 2537
2196 2617
1953 2059
2354 2115
2060 2551
2206 2329
2297 1973
2000 1998
1941 2043
2609 2315
2468 2511
2287 2233
2560 1918
2250 2597
1962 2276
2463 2384
1920 2068
1986 1993
2509 2283
2593 2418
2103 2229
2406 2367
2201 2240
2306 2356
2453 2003
1983 2504
2111 2582
2111 2472
2161 2222
2104 2492
2429 2489
2398 2127
2102 1947
2549 2059
2223 1920
2482 2374
2604 2233
2575 2123
2328 2479
2351 2649
2607 2625
2114 2176
2369 2376
2539 2542
2398 2254
2497 2248
2593 2064
2473 2508
1941 2057
2563 1979
2500 2464
2135 2332
2319 2516
2572 2047
2423 2098
2007 2396
2210 2020
2123 2329
2561 2469
2582 1913
2587 2577
2654 2190
2482 2619
2543 2052
2538 2097
1975 2360
2364 2645
2519 2543
2450 2342
2392 1918
2045 2489
2190 1985
2187 1959
2216 2131
2554 2655
2387 2520
2539 2482
2124 1971
2266 2460
2584 2476
2509 2096
2617 2254
1962 2381
2302 2533
2181 1949
2327 2343
2254 2396
2352 2460
2087 2144
2247 2087
2093 2625
2616 2087
1993 2551
2253 2602
2007 2176
2011 2022
2325 1923
2052 2582
2423 1929
2232 2032
1998 1958
2096 2434
2150 2339
1975 2197
2458 2053
2340 2604
2623 2324
2248 2286
2090 2624
2240 2539
2593 2172
2511 2377
2266 2559
2112 2150
2586 2549
2384 2445
2084 2139
1946 2118
1945 2028
2582 2279
2475 2149
2594 2372
2047 2199
2408 2122
2339 2646
2428 2334
2028 2649
2294 2511
2233 2536
2176 2114
2451 2396
2588 2285
2464 2179
2646 2376
2210 2253
2414 2237
2552 2326
2210 2469
2630 2573
2600 2428
2240 2449
1963 2306
2369 2623
2115 2340
1963 2446
1957 1972
2607 2573
2423 2506
2289 2543
2451 2347
2567 2247
2573 2244
2123 2074
1939 2161
2617 2235
2602 2409
2213 2352
2199 2241
2594 2516
1917 1986
2638 2507
1979 2037
2004 2620
2046 2590
2194 1987
2353 2590
2188 2311
2374 2131
2625 2240
2309 2046
2640 2022
2578 2154
1984 2240
2098 2045
2148 2247
2593 2408
2395 2468
2073 2578
2026 2196
1964 2342
2495 2108
2513 2170
2354 2088
2275 2090
1939 2274
2121 2237
2646 1929
2153 2292
2032 2194
2045 2073
2278 2142
2153 2149
2586 2118
2563 2638
2266 2376
2408 2347
1957 2116
2201 2354
2571 2417
1962 1971
1916 2292
2333 2127
2184 2564
2601 1929
2510 2102
1956 2281
1929 2253
2206 2546
2214 1964
2140 2188
2556 2433
2475 2294
2091 1960
2046 2229
2090 2631
2043 2550
2061 2648
2460 2060
2283 2343
2412 2411
2542 2593
2037 2359
2071 2609
2395 2276
2383 2326
2648 2061
2033 2093
1945 2319
2287 2240
2292 1718
2260 2070
2630 2625
1577 2294
2500 2308
2134 2149
2052 2649
1941 2007
2150 2370
2433 2309
2511 2555
2322 2610
2506 2261
2268 1964
2340 2347
2172 2104
2553 2261
2446 2560
2451 1718
2110 2132
2386 2309
2625 2601
2511 1947
2573 2037
2334 2339
2561 1943
2203 2180
2005 1966
2059 2504
2299 1993
2001 1991
2172 2552
2081 2294
2154 2340
2250 2249
2604 2043
2526 2331
2423 2220
2271 2354
2520 2624
2111 2151
1982 2327
2190 2233
2139 2118
2543 2340
2396 2438
2292 2653
2552 2115
2512 2127
2072 2471
2237 1984
2132 2384
2322 2325
2564 2073
2402 2313
2543 2039
2324 1929
2654 2124
2081 2029
2072 2398
2549 2484
2624 2090
1951 2620
2037 2625
1945 2117
2189 1718
1921 1954
2644 2047
1979 2500
2630 2123
2555 2224
2520 2073
2132 2221
2361 2070
1920 2597
2272 2432
2414 2266
2328 2344
2578 2216
2484 2354
2433 2638
2236 2080
2098 2300
2532 2074
2550 2370
2543 2250
2497 1936
2211 2174
2006 2097
2550 2078
2103 2564
2590 2108
2258 2188
2069 2300
2275 2553
2553 2575
2409 2136
2620 2024
2397 2082
1964 2265
1938 2308
2052 1945
2657 2097
2498 2461
2586 1962
2464 2037
2429 2044
2276 2078
2363 2350
2213 2484
2004 2022
2058 1942
2369 1963
2538 2284
1985 1994
2299 2326
2654 2093
2281 1956
1927 2061
2394 2592
2478 2131
2101 2344
2433 2559
2294 2143
2199 2592
1983 2240
2059 2253
2091 2659
1577 2071
2562 2397
2283 2342
1954 1951
2154 2484
2404 2308
2631 2278
2229 2409
2550 2275
2059 2552
1938 2556
1999 2645
2336 2144
2308 2069
1947 1945
2484 2593
2247 2151
2276 2040
2150 2278
2347 2433
2309 2464
2324 2556
2561 2220
2592 2530
2279 2302
2282 2101
2087 2294
2551 2354
2103 2484
2134 2148
2590 1997
2005 1962
2206 2414
2244 2112
2434 2072
2289 136
1944 2031
2384 2543
2414 2055
2353 2240
2402 2129
2578 2339
2593 2370
2039 2134
2282 2273
2141 2272
2302 2102
2064 2037
2611 2363
2075 2415
2335 2314
2615 2056
2363 2045
2475 2153
2266 2354
2222 2344
2289 2362
2174 2102
2655 2290
2582 2246
2438 2282
2062 2351
2469 2520
2624 2654
2199 2398
2145 2176
2638 2590
2283 2617
2065 2530
2607 2093
2198 2111
1997 2353
2187 2250
2210 2324
2450 2217
1935 2583
2407 2414
2037 2575
2408 2064
2514 2517
2006 2011
2212 2271
2299 2212
2149 1954
2028 1945
2428 2404
2157 2116
2492 2408
1983 2552
1928 2620
2206 2098
2136 2363
2054 2143
2500 2354
1971 2591
2624 2386
2359 2216
2142 2123
1989 2607
2304 2368
2511 2110
2340 2542
2323 2386
2261 2615
1921 2533
2115 2543
2508 2102
1920 2267
2102 2471
2418 1985
2174 2377
2659 2657
1948 2053
2594 2268
2220 2348
2231 2316
2140 1943
1926 2608
2384 2642
2196 2127
2653 2117
2149 2215
2480 1944
1984 2237
2612 2406
2271 2590
2602 1943
2602 2201
2188 2381
2520 2095
2009 2018
2188 2586
2403 2397
2363 1953
2611 2386
2146 2091
2506 2084
2120 1922
2095 2601
2409 2213
2088 2045
2657 2636
1955 2458
2054 2221
2359 2078
2045 2055
2409 2590
2053 2125
2606 2069
2302 2224
2340 2369
2210 2359
2087 2026
2081 2132
2654 2074
1938 2586
2351 2642
2332 1577
2038 2145
2590 2630
2240 2462
2216 2600
2142 2414
2216 2084
2351 2597
1979 2554
2280 2652
1989 2033
2432 2486
2073 2112
2039 1926
2365 2018
2658 2025
2327 2199
2563 1925
2224 2471
2498 2610
2281 2167
1941 2385
2556 2492
2363 2593
2038 2498
2576 2350
2501 2509
2188 2216
1938 2201
2654 2334
2320 2426
2629 136
1926 2183
2495 2229
2090 2104
1992 2255
2509 2053
2520 2430
2633 1957
2507 2563
2351 2609
2354 2404
2115 1943
2093 2266
1929 2553
2579 2063
2643 2052
2408 2654
2630 2240
2604 1918
2520 2122
2414 2485
1963 2290
2140 2020
2642 2135
2142 2095
2233 2654
2072 2032
2368 2199
2354 2090
2118 2240
2410 2482
2054 2351
2370 2429
2650 2444
2332 2385
2194 2241
2300 2220
2410 2370
2526 2578
2176 2026
2030 2410
1963 2326
2266 2578
1995 2116
2647 2447
2542 2189
2037 2414
2062 2235
2046 2423
2122 2083
2275 2374
2127 2148
2613 2233
2241 2518
2292 2372
2123 1963
2329 2347
2622 2490
2654 2290
2550 2506
1989 1979
2630 2553
2364 2192
2266 2213
2547 2215
2007 2224
1959 2533
2524 2501
2553 2140
2616 2511
2359 2381
2129 2035
2615 2140
2098 2218
1945 1994
2037 2407
136 1991
2547 2463
2008 2152
2084 2376
2643 2153
2521 2253
1465 2385
2237 2485
2333 2399
2121 2244
2278 1946
2278 2464
2376 2244
2032 2191
2340 2591
2243 2415
2184 2507
2539 2308
2654 2069
2575 2363
1925 2201
2564 2552
2602 2574
2250 2273
2354 2410
2399 2203
1947 2396
1971 2139
2111 2465
2278 2037
2274 2328
2359 2363
2354 2121
2121 2532
1966 2044
2571 2315
2075 2333
2087 2510
2098 2561
1927 2627
2117 2232
2642 2066
2122 2290
2384 2052
2477 2056
2539 2244
2069 2348
2333 2223
2600 2093
2306 2593
2173 2497
2290 2244
2216 2492
2142 1979
2108 2093
2323 2619
2153 2174
2032 2592
2630 2164
2646 1917
1954 2149
2172 2069
2139 2363
2088 1941
2499 2623
2127 2394
2275 2271
2414 2347
1946 2058
2363 2392
1465 2266
2038 2525
2560 1983
2279 2336
2187 1955
2594 2379
2127 2038
2211 2232
2001 2636
2347 2334
2128 2529
2165 2213
2213 2407
2236 2129
2507 2392
2338 2138
2156 2412
2118 2630
2344 2327
2104 2469
2356 2520
2017 2421
2500 1966
2226 2581
2117 2419
2073 2564
2033 2553
2044 2631
2237 2073
2031 2588
2539 2122
2604 1946
2462 2347
2500 2507
1915 2251
2240 1997
2546 2601
2352 2482
2526 2033
2065 2385
2102 2385
2327 2344
2543 2111
2608 2333
2448 2236
2593 2059
2427 2611
2625 2549
2386 2556
2489 2073
2206 2506
2402 2089
2567 2436
1940 2289
2057 2208
2329 2623
2329 2536
2460 2334
2292 2425
2554 2359
2377 2169
2460 2188
2407 2428
2567 2176
2194 2567
2520 1979
2597 2191
2127 2149
2445 2398
2220 1966
2615 2090
2258 2311
2559 2347
2257 2165
1932 2347
2553 2063
2551 2078
2090 2261
2339 2123
2142 2324
2044 2037
2137 2293
1918 2139
2189 2384
2404 2300
2133 2268
2282 2501
2117 2480
2075 2235
2164 2093
2385 2068
2222 2434
2536 2591
2180 2169
2144 1955
2272 2610
2151 2294
2638 2136
2579 2188
2300 2088
2188 2290
1986 2604
2549 2655
2244 2233
2336 2519
2625 2623
2199 2417
2229 1941
2074 2423
2559 2244
2218 2326
2064 2326
2324 1971
2084 2118
2376 2063
2283 2518
2499 1966
2391 2611
2118 2046
2271 2290
2086 2369
2224 2223
2564 2423
2645 2171
1925 2083
1941 2475
1997 2574
2154 2095
1958 2284
2317 2091
2068 2473
2629 2419
2142 2043
2087 2344
2148 2649
2463 1954
2180 2148
2501 1989
2142 2408
2176 2498
2607 2233
2059 2625
2266 2329
2057 2491
2179 2546
2049 2474
2282 2125
2210 2395
2494 1972
2567 2555
2521 2602
1979 2339
1465 2283
1946 2258
2508 2180
2315 2643
2600 2578
2648 2006
2282 2280
1941 2053
2266 2454
2498 2343
2376 1985
2408 2485
2333 2617
2196 2241
2206 2386
2216 2560
2578 2046
2475 1945
2139 2058
2600 1985
2554 2574
1944 2452
2244 2526
2289 2180
2430 2064
2278 2354
2250 2174
1989 2201
2396 2279
1959 2598
2542 1946
2601 2573
1953 2625
2190 2550
136 2007
2330 2038
2552 2184
2440 2628
2362 2642
2458 2394
2646 2359
1995 2157
2267 1577
2623 2428
2236 2231
2255 2170
1997 2554
2539 2115
2326 2573
2492 2625
2381 2229
2376 2309
2171 1914
2585 2626
1959 2282
2274 2479
2095 2602
2480 2642
2507 2500
2154 2602
2078 1917
2315 2592
2579 2123
2614 2448
2110 2377
2333 2463
2398 2174
2552 2611
2093 1993
2604 2542
2530 2521
2319 2282
1971 2586
2247 1970
1984 2033
1981 1959
2475 2512
2289 2087
2222 2390
2333 2221
2428 2477
2520 1986
2363 2278
2030 2074
2615 2604
2183 2567
2354 2190
2660 1927
2286 1975
2218 2484
2033 2112
2330 2149
2005 2287
2063 2359
2409 2369
2407 2005
2246 2333
2530 2502
2212 2543
2550 2410
2484 2552
1980 2171
2419 2254
1916 2377
2414 2244
1925 2109
2448 2342
2538 1928
2084 2556
1966 2083
1920 2161
2333 2149
2402 2448
2237 2005
2123 2520
2611 2482
2554 1997
2023 2091
2306 2559
2315 2420
2471 2347
2549 2188
2504 2257
2328 1718
2543 2338
1994 2333
2132 2652
2390 1970
1946 2607
2509 2032
2146 2193
2508 2223
2360 2105
2472 2465
2550 2352
2550 2575
2511 2196
2275 2552
2084 2045
2392 2526
2244 2392
2546 2045
1929 1963
2554 1938
2128 2135
2392 2369
2422 2441
2573 2090
2247 1955
2461 2226
2308 1983
2088 2229
2473 2289
1983 2468
1997 2625
2576 2561
2586 2489
2468 2555
2371 2317
2446 2340
1929 1983
1921 2202
2646 2216
2601 2579
2543 2597
2328 2351
2188 2154
1959 2032
2159 2657
2059 2045
1917 2115
2115 2526
2489 2122
2031 2419
1984 2324
2290 2625
1957 2025
2408 2103
2601 2307
2133 2052
1577 2111
2324 2210
2081 2367
1955 2463
2030 1962
2218 2073
1971 2266
2073 2078
2279 2351
2492 2418
2237 2602
2112 2059
2031 2318
2363 2074
2218 2391
2006 2192
2333 1577
2032 2351
2065 2040
2560 2561
2411 2231
2615 2078
2563 2607
1993 2462
2338 2187
2074 2200
2189 2597
2049 2403
2297 2159
2477 2433
2607 2083
2083 2564
2206 2278
2028 2420
2090 2430
2140 2233
2419 2336
2404 2339
2355 2283
2573 2607
2384 2293
2037 2056
2543 2428
2194 2475
2212 2532
2309 2218
2033 1943
2271 2216
2020 2112
1962 2485
2526 2201
2336 2038
2151 2289
2359 2354
2134 1959
2150 1917
2619 2331
2125 2232
1944 2029
2445 2394
2030 2098
2546 2619
2436 2187
2119 2644
2511 2072
2153 2465
2324 2275
2194 2134
1975 2193
2059 2549
2183 2471
2054 2608
1999 2538
2102 2509
2201 2386
2069 2578
2206 2056
2583 2636
2336 2010
2600 2464
2545 2300
2324 2602
1994 1577
2224 2149
2254 2372
2138 2072
2399 2458
2108 2200
2526 2586
2511 1932
1989 2381
2226 2475
1917 2607
2575 2030
1948 2592
2308 2630
2553 2115
2578 2549
2473 2264
2543 2196
2418 2586
2244 2005
2224 2336
2272 2540
2456 2317
2020 2391
2073 2363
2287 1929
2160 2260
2499 1989
2324 2340
1971 2257
2556 2549
2608 1945
1926 2176
1961 2317
2398 2401
2447 1972
2304 2377
2239 2588
2172 2615
2302 1941
2037 2092
2532 2591
2602 1941
2256 2214
2122 2323
2112 2495
2590 2287
2045 2103
2462 1953
2049 2534
2653 2047
2220 2409
2184 2553
2543 2590
2377 2081
2653 2038
2467 2552
2625 2624
2098 2468
2467 1929
1980 2284
2042 1987
2290 2624
2046 2324
2248 2497
2078 1918
2063 2553
1945 2187
136 2224
2601 2043
2381 2077
2165 2020
2495 2244
2127 2511
2509 2597
2620 2660
2111 2537
2505 2651
2384 1945
2334 2446
2609 1941
2124 2104
2184 2369
1979 2638
2501 2221
2599 1959
2109 2020
2406 2366
2294 2169
1718 2052
1916 2419
2223 1926
2194 2133
2408 2172
2062 2096
2407 2464
2433 2188
1977 2291
2059 2275
2353 2593
2430 2485
2179 2240
2302 2282
2384 136
1948 2461
2468 2007
2445 2203
2593 2030
2588 2419
2588 2151
2611 2150
2602 2619
2559 1986
1943 2088
2101 1939
2261 2206
2276 2574
2289 2328
2600 2606
2619 1962
2550 2331
2539 2363
2593 2063
2428 2392
2253 2040
2533 2111
1577 2199
2646 2118
2206 2526
1959 2153
2281 2094
2292 1954
2631 2045
2088 2093
2409 2046
2429 2300
2624 2139
2521 2311
2332 2302
2408 2386
2546 2563
2440 2644
2141 2419
2139 2184
2588 2491
2433 2477
2098 2190
2559 2030
1920 2187
2601 2040
2322 2397
2497 2286
2652 2396
2279 2191
2495 2624
2377 2273
2607 2391
2462 1943
2356 2200
2588 2189
2607 2257
1925 2500
2190 2140
2016 1995
2376 2090
2492 2115
2381 2410
2236 2448
2206 2220
1941 2206
2592 2509
2111 2169
1932 2117
2638 2374
2184 2532
2638 2124
1917 2069
2542 2631
2546 2591
2623 2381
2199 2609
1984 2500
2409 2500
2024 2378
2046 2200
2542 2485
2003 2111
2516 2163
1993 2323
2084 2554
2045 2122
2518 2516
2451 2384
2289 2036
2326 2410
2331 2464
2590 2542
2462 2551
2041 2313
2524 2103
2266 2353
2564 1925
2289 2282
2095 2370
2291 2265
2073 2090
2300 2476
2283 2302
2010 2336
2282 2199
1465 2384
2532 2542
2526 2212
2223 2134
2624 2324
2590 2446
1920 2547
2646 2093
2283 2461
2333 2052
2448 2130
2370 2237
2271 1989
2309 2601
2128 2384
2328 2294
2575 2593
2628 2129
2212 1917
2037 2030
2088 2122
1983 2613
2122 2073
2575 2526
2302 2502
2604 2606
2043 2347
2124 2271
2336 2629
2475 2302
2058 2275
1971 2352
2088 2266
2590 2369
2656 2322
2063 2339
2150 2507
2117 1944
2506 2123
2347 2278
2359 2601
2468 1962
2352 2123
2246 2461
2296 2145
2642 2223
2283 2194
2308 2430
2379 2047
2134 2241
2461 2491
2384 2138
1941 2072
2552 2550
2043 2237
2387 2124
2086 2064
2561 2482
2559 2237
2190 2507
2559 2309
2507 2212
2241 2498
2224 2163
1938 2030
2653 2420
1966 2074
2190 1997
2254 2007
2495 2492
2110 2333
2404 2469
2267 2026
2058 2078
2240 2526
2429 1941
2331 2500
1923 2610
2533 1945
2648 1927
2266 2033
2578 2359
2336 1981
2233 2348
2075 2060
2073 2469
2083 2395
2561 2615
2108 2428
1962 2655
2520 1918
2370 2446
2100 2217
1993 2139
2377 2347
1970 2247
2307 2088
2323 2359
2601 2306
2347 2309
2174 2031
2277 2047
1993 2347
2131 2363
2053 2617
2131 2237
2005 2059
2344 1947
2631 2468
2142 2258
2347 2098
2348 2607
2179 2611
2436 2038
2237 2370
1979 2553
2038 2135
2465 2111
2150 1938
2054 2026
2354 2200
1993 2326
2429 2212
2047 2416
2118 2602
2538 1998
2203 2512
1997 2233
1948 2510
2614 2450
2520 2631
2356 1925
2246 2384
2237 2354
2485 2573
1963 2275
2187 2582
2327 1954
2342 2228
2111 2282
2359 2624
2253 2103
2084 2352
2056 2428
2500 2381
2464 2098
2037 2492
2574 2532
2376 2043
2179 2064
1986 2115
2332 2279
2588 2054
1993 2429
2111 2183
2240 2369
2539 2359
2507 2551
2460 2576
1938 2575
2139 1979
2509 2537
2187 1948
2283 2533
1971 2098
2381 2131
2551 2469
2508 2111
2228 2199
2028 2330
2579 1966
2040 2201
1946 2409
2546 2084
2102 2325
2370 2261
2654 2520
2419 2141
2109 2607
2247 2529
2520 2088
2039 1994
2084 2573
2290 2045
2037 2630
2323 2607
2482 2383
2059 2229
1718 1954
1923 2133
2210 2340
2319 2463
2275 1983
2482 2237
2419 2398
1918 2392
2183 2594
2247 2283
2355 1947
2336 136
2551 2218
2410 2638
2229 2005
2125 2283
1940 1718
2340 2409
2563 1962
2356 2121
2125 2328
2331 2090
2352 2165
2392 2103
2340 2276
2354 1997
2348 2200
2308 2122
2220 2520
2589 2127
2319 136
1941 2208
2332 2333
2655 2564
2571 136
2139 1971
2559 2495
1947 2169
2620 2001
2363 2131
2611 2560
2098 2590
2655 2376
2645 2435
2247 2518
1953 2324
2033 2391
2578 2586
2315 2196
2254 2032
2461 2102
2520 2090
2071 2189
2383 2339
2543 2083
2593 2069
2533 2472
2042 2279
2191 2289
1963 2586
2290 2253
2095 2507
1919 2585
2501 2336
2188 2083
2332 2128
1945 2315
2299 2118
2306 2646
2590 2090
2142 1917
2430 2179
2149 2134
2543 2241
2165 2084
2347 2462
2032 1920
2630 2460
2030 2574
2433 2556
136 2589
2567 2194
2187 2319
2399 2333
2468 2206
2218 2124
2323 1925
2032 2068
2336 1941
2190 2240
2191 2148
1948 2336
2418 2112
2604 2460
2148 2629
1966 2043
2059 2324
2580 2474
2392 2218
2206 2086
2250 2133
2598 2372
2484 2218
2615 1925
2572 2332
2327 2235
2304 2511
1943 2074
2468 1963
2346 2633
2399 2649
2056 2095
1926 2226
1923 2452
2354 2306
2504 2624
2187 2127
2352 2115
2482 2253
2604 2600
1971 2554
2046 2040
1945 2102
2608 2057
2446 2464
2543 2189
2309 2165
2582 2384
2451 2111
2328 1940
2468 1984
2579 2069
2190 2551
2226 2221
2289 2533
2038 2508
1916 1947
2292 2436
2560 2043
1946 2059
2549 2526
2501 2331
2526 2104
2570 2107
1945 2203
2460 2363
2323 2521
2543 2095
2504 1979
2485 2500
2489 2257
2475 2319
2520 2059
2220 2655
2324 2306
2554 2275
2073 2410
2648 1972
1994 2609
2109 2299
2007 2285
2359 2485
2108 2060
2127 2510
2154 2233
2104 2549
2257 2020
1985 2201
2652 2280
2243 2266
2138 2239
2651 1974
2463 2148
2482 1917
2194 1920
1964 2302
2623 2409
1943 2409
2624 1917
1998 2494
1948 2463
2131 2428
1917 2290
2352 2060
2084 2468
2111 2609
2153 2215
2241 2176
2007 2218
2329 2602
2047 2272
2611 2579
2376 2340
2180 2224
1917 2586
2512 2509
2551 2095
2103 2386
2329 2395
2396 2491
2585 2648
2212 2340
2276 2088
1577 2052
2573 2631
2025 2627
2033 1941
2337 2365
2458 2239
2220 1917
2510 2588
2586 2591
2216 2625
2084 2083
1984 2055
2087 2264
2340 1971
2186 2366
2066 2517
2131 2140
2467 1938
2550 2539
2590 2563
2331 2220
2538 1995
2241 2250
1925 2464
1979 2045
2046 2334
2582 2502
2153 2319
2206 2233
2069 2485
2125 2384
2655 2043
2406 2566
2139 2201
2642 2196
2306 2329
2200 2392
2560 2369
2247 2384
2564 1963
1958 2006
2644 2448
1577 1948
2010 1940
2538 136
2161 2327
1980 2025
2268 2459
2615 2030
2139 2414
2328 2243
2294 2223
2586 2124
2629 2509
2631 2374
2220 2154
2326 2590
2292 2368
1963 2553
1945 2616
2424 2107
2319 2293
2414 2607
2086 2625
2397 2322
1989 2611
2133 2351
2224 2010
2538 2050
2436 2598
2083 2257
2233 2323
2436 2053
2590 2030
2084 2601
2508 2451
1983 2150
2434 2002
2567 2351
2573 2409
2115 2261
2058 2383
2445 1987
2331 2229
2623 1918
1465 2399
2610 2102
2502 2128
2566 2366
2243 2161
2482 1943
2293 2496
2074 2551
2419 2445
2285 2333
2233 2056
2143 2071
2352 2579
2282 2336
2589 2617
2504 2575
2509 1718
2352 2261
2533 2332
2140 2240
2398 2072
2380 2313
2022 2006
2507 2142
2275 2131
1997 2646
1917 2619
2340 2469
2602 2020
2347 2293
2180 2302
2608 2223
2131 2468
2399 2328
2283 2384
2643 2042
2242 2501
1945 2125
2073 2271
2131 2369
2184 2037
2624 2564
2020 2237
2028 2351
2352 2507
2165 2122
2607 2140
2317 1933
2242 2637
2301 2126
2342 2632
2531 2571
2526 2123
2078 2468
2025 1972
1995 1927
2507 2090
2531 2413
2379 2617
2295 2516
2578 2069
2028 2512
2317 2236
2638 2093
2609 2598
1989 2543
2189 2395
2069 2550
2394 2304
2110 2054
2509 2047
2484 2093
2091 1964
2191 2315
1925 2600
2316 2597
1929 2115
1465 2555
2640 2116
2328 2010
2446 2392
2460 2237
2418 2257
2136 2043
2164 2542
2325 1970
2031 2066
2630 2257
2198 2072
2374 2276
2601 2164
2145 2277
2022 1951
2385 2199
2616 2336
2024 2016
2564 2607
2619 1986
2417 2608
2617 2282
2220 2631
2319 2491
2328 1955
2206 2462
2582 2169
2430 2593
2299 1938
2083 2363
2300 2545
1926 2279
2600 2611
2564 2631
2436 2032
2433 2553
1465 2293
1951 2000
2201 1938
2057 2333
2164 2404
2354 1985
2347 2086
1577 2267
1991 1931
2604 2590
1953 2266
2369 2500
2073 2560
2128 2283
2495 2261
2268 2068
2396 2054
2326 2084
2381 1917
1946 2064
2579 2201
2172 2290
2344 2582
2283 2451
1971 2559
2561 2520
2093 2655
2268 2024
2408 1984
2604 2532
2257 2356
2138 2180
2654 2460
1920 2117
2522 2087
1947 2032
2216 2646
1943 2271
2246 2185
2182 2642
2606 2469
2408 2059
2490 2622
2112 2550
2127 2351
2052 2203
2271 2574
1973 2459
2465 2153
2117 2351
2543 2463
2451 2283
2101 2161
2098 2348
2039 2347
2363 2040
2010 2174
2326 2383
2047 2102
2309 1984
2242 2425
2065 2592
1939 2458
2226 1952
2501 2242
2386 1984
2142 2347
2646 2188
2311 2172
2386 2093
2280 1982
2324 2482
2329 2615
2339 2383
2111 2649
2048 2498
2521 2261
2374 2184
2271 2409
2059 2561
2521 2040
2300 2619
2588 2514
2404 2563
2631 2139
2611 2037
2134 2191
2093 2112
2359 2271
2323 2165
2455 2587
2266 2188
2653 2609
2370 2374
2336 2161
2555 2279
2523 2231
2611 2216
2553 2037
2300 2309
2574 1929
2172 1983
2056 2391
2356 2601
2491 1947
2093 2404
2278 2257
2046 1953
2462 1979
2275 1971
2327 2211
1978 2173
2520 2275
2619 2121
1993 2409
2278 2392
1465 1945
2084 1966
2521 2190
2282 2509
1954 2585
2601 2201
2264 1947
2511 2512
1947 2267
2652 2394
2018 2647
1999 2004
2002 2537
2294 2461
2078 2564
2504 2464
2640 2627
2075 2053
2081 2597
1983 2261
2278 2154
2586 2078
2451 2617
2104 2561
2343 2187
2324 2213
2397 2130
2607 2485
2363 1984
2102 2071
2511 1577
2610 2641
2108 2324
1997 2299
2381 2084
1928 1998
2299 2615
2150 2103
2228 2158
2201 2140
2550 2409
2123 2073
1943 1953
2504 2460
2575 2414
2025 2001
2559 2037
2285 2268
2590 2386
2093 2108
2234 2056
2300 2468
2630 2083
2203 2294
2232 2589
2460 2348
2123 2261
136 1976
2467 1917
2257 2290
2468 2460
2037 2464
2377 2289
2516 2183
2235 2111
2625 2142
2446 2142
2290 2112
2328 1954
2588 2176
2283 2153
2372 2543
2592 2327
2166 2289
1982 2512
2054 2419
1917 2103
2111 1945
2030 2331
2619 2334
2433 2093
2122 2521
2040 2374
2276 2543
2290 2376
2307 2055
2593 2354
2417 2491
2492 2307
2499 2074
2121 2033
2244 2323
2267 2537
2047 2468
2213 2433
2495 2278
2451 2598
2593 2103
2006 1951
2555 2511
2247 2616
2046 2631
2420 2609
2477 1979
2297 1951
2271 1979
2590 2623
2502 2268
1997 2184
1984 2578
2519 2149
2529 1718
2229 2469
2549 1997
1941 2351
2615 1929
2206 2164
2043 2601
2602 2613
2381 2638
2436 2144
2223 2189
2392 2543
2474 2335
2539 2574
2655 2504
2334 2046
2235 1959
2338 2332
2615 2532
136 2640
1995 2660
2032 1465
2064 2506
2340 2287
2328 2398
2561 2206
1987 2289
2038 2322
2271 2188
2233 2088
2376 2086
2111 2479
2020 2030
2148 2174
2196 2153
2429 2430
2171 2297
2542 2430
2300 1917
2420 2052
2446 2064
2555 1920
2037 2606
2430 2229
2109 1983
2007 2026
2354 2370
2112 1971
2215 2268
2250 2400
2477 2218
2504 2619
2073 1953
1954 1945
2145 2612
2608 2232
1938 2462
1966 2172
2007 2054
1985 1959
1985 2184
2231 2156
2008 2412
2271 1971
2123 2103
2228 1975
2325 2310
2438 2101
2083 2347
2636 1935
2278 1938
2190 2005
2417 2597
2625 2078
2119 2474
2479 2333
2342 1960
2045 2093
2319 1718
2180 2151
2627 2061
2237 2607
2250 1920
2459 1976
2250 2038
2133 2175
1925 2118
2161 2597
2037 2218
2311 2124
2464 2579
2196 2187
2142 2056
2203 2176
2377 2246
2356 2299
2332 2609
2140 2414
2059 1993
2414 2078
2535 2481
2395 2271
2307 2309
2340 1983
2188 2063
2046 1929
2590 2340
2365 1921
2294 2617
2553 2165
2069 2607
2313 2528
2055 2539
2084 2561
2395 2623
2538 2024
2042 2351
2064 2210
2002 2509
2028 2174
2115 1985
1941 2071
2391 2334
2083 2611
1995 1919
2655 2552
2246 2054
2592 2111
2478 2586
2500 2240
2218 2352
2098 1938
2506 2037
2336 2241
2090 2482
2641 2221
2587 2570
2430 2131
1968 1951
2237 2059
2588 2127
2133 2214
2149 2138
2369 2506
2283 2289
2623 2220
2112 2554
2231 2341
1964 1977
1971 2339
1915 2455
1963 2638
2271 2220
2026 2550
2224 2345
2098 2556
2279 2649
2327 2471
2337 2297
1954 2174
2630 2233
2068 2133
1926 2161
2512 1994
2128 2594
2423 2376
2560 2045
2542 2331
2190 2172
1943 2218
2161 2221
2240 2578
2176 2304
1976 1972
2546 2240
2407 2104
2216 2233
2073 2154
2649 2189
2108 2184
1964 2189
2196 2138
2229 2244
2542 2521
1959 2243
2218 2359
2423 2433
2607 1993
2019 2449
1955 2180
1993 2021
2381 2619
2477 1946
2203 2413
2184 2240
2434 2032
2045 2370
1935 2585
2142 2077
2062 2243
1929 2077
2238 2455
2124 2600
1989 2499
2504 2477
2121 2139
2097 1914
2271 2553
2325 2379
2141 1964
2248 2503
2468 1966
2449 2410
2404 2257
2384 2652
2575 2083
2043 2489
2374 2500
1718 2498
2210 2564
2377 2519
2132 2054
2109 2123
2159 1931
2515 2486
2461 2007
2309 2354
2539 2586
2629 2032
2354 2142
2354 2290
2600 2055
2033 1984
2055 2339
2229 2184
2420 2465
2344 2264
2297 2337
2331 2139
1998 2346
1984 2464
2610 2529
2047 2472
2188 2504
2302 2543
2183 2394
1953 2200
2324 2579
2488 2523
2313 2091
2516 2224
2140 2575
2069 2414
2057 2292
2601 2602
2464 1941
2463 1718
2222 2235
2504 2188
2151 2338
2582 2047
2093 2059
2266 2300
1941 2370
2482 2306
2549 2142
2294 2419
2512 2410
2468 2184
2318 2242
2118 2507
2430 2339
2556 2093
2058 2492
1953 2188
2124 2103
2073 2468
2642 2420
2491 2536
2475 1948
2122 2348
2138 2215
2239 2194
2302 2273
2464 2331
2326 2499
2476 2561
2118 2446
2356 2046
2282 2516
2161 2199
2058 2334
2042 2502
2284 2583
2188 1946
2240 2043
2484 2309
2575 2206
2383 2007
2419 2282
2156 2197
1951 2009
2552 2428
2253 2654
2170 2401
2111 2054
1929 2462
2288 2235
2353 1966
2560 2165
2078 2550
2655 2601
2583 1914
2520 2468
2029 2081
2521 1985
1954 2629
2560 2638
2660 2268
2609 2653
2056 2200
2593 2655
2449 2345
1953 2460
2398 2598
2609 2087
2607 2619
2363 2446
2125 2246
2337 2364
2472 1577
2275 1966
2492 2574
2601 2414
2007 2616
2189 2288
2623 2090
2604 2521
2087 2347
2066 2514
2415 2509
2575 1917
2143 1916
2280 2608
2083 2069
2396 2603
2187 2144
2471 2007
2271 2376
2243 2333
2549 2625
2090 2064
2063 2551
2218 2165
2463 2445
2108 1943
1970 2493
2592 1465
2306 2410
2199 1945
2218 2638
2015 2152
2104 2020
2339 2559
2480 2096
2144 2592
2636 2365
2090 2150
2090 1983
2655 2374
2334 2409
2407 2646
1957 2627
1981 1939
2624 2619
2645 2024
2334 2324
2172 2433
1990 2405
2139 2212
2471 2134
2407 2551
2188 2556
2149 2325
2598 2125
1983 2611
2279 1941
2084 2184
2391 2387
2638 2030
2005 2578
2459 2640
2078 2492
2143 1999
2590 2433
2638 2122
2561 2449
1991 2636
2161 2075
2563 2073
2081 2133
2340 2554
2539 2261
2328 2438
2120 2082
2140 2625
2005 2489
2328 1959
2283 1945
2043 2404
2111 2629
2201 2604
2140 2468
2332 1465
2124 2410
2087 2616
136 2647
2064 2395
2488 2158
2287 2604
2615 2462
2551 1962
2268 2039
2161 2471
2655 2233
2414 1925
2272 2419
2149 2174
1577 2032
2302 2643
2368 2187
2010 2598
2046 2492
2551 2084
2638 2323
2649 2183
2264 2198
2267 2294
2324 2631
1991 2001
2491 2327
2187 2273
2102 2174
2088 2429
2087 2582
2093 2615
2602 2005
2136 2611
2307 2446
2386 2482
2229 2109
2644 2474
2223 2295
2409 2429
2118 2040
2153 2336
2283 2099
2144 2491
1948 2087
2516 2643
2473 2250
2074 2602
2184 2074
2229 2607
2339 2271
2564 2300
2131 2118
2520 2108
2192 1935
2081 2110
2512 2054
2660 2620
2630 2551
2143 2241
2376 2275
2338 2344
2601 2253
2125 2198
2005 2266
1917 2407
2165 2278
2074 2118
2617 2479
1985 2329
2088 2586
2461 2174
1917 2395
1929 2059
2123 2184
1989 2290
2154 2654
2347 2033
1963 1917
2299 2593
2563 1983
2046 2059
2010 2292
2103 1941
1953 2340
2419 2434
2172 2118
2154 2477
2188 2553
2542 2150
2592 2247
2449 1966
2124 2077
2087 1926
2253 2631
2618 2614
2465 2555
2546 2504
2564 2237
2223 2053
2176 2509
2603 2509
1979 2118
2436 2344
2215 2117
2553 2356
2464 1946
1962 2492
2398 2642
2472 2053
2271 2467
2499 2084
2030 2504
1945 2518
1989 2352
2287 2630
2188 1925
2530 2333
2108 2615
2434 2372
2073 1984
2032 1932
2564 2359
2266 2370
2139 2104
2468 2150
1994 2498
2284 2014
2192 1951
2033 2446
2072 2445
2428 2655
2423 2492
2370 2275
2586 2560
2544 2292
2615 2329
2312 2529
1916 2247
2253 2546
2074 2414
2555 2509
2213 2165
2317 2580
2308 2607
1986 2410
2643 2502
2165 2381
2591 2430
2469 2210
2240 2064
2282 2347
2536 2150
2331 2532
2658 2627
2365 2116
2638 2040
2567 2223
1945 2399
2289 2032
2484 2586
2378 2001
2617 2399
2462 1984
2063 2220
2218 2213
2619 2363
2601 2504
2576 1966
2340 2326
2446 2564
2131 2485
2567 2283
2132 2072
2064 1941
2172 2526
2347 2244
2241 2032
2330 2315
2546 2574
2601 2606
2118 2307
2302 2047
2338 2183
1966 2233
2229 2549
2090 2108
2546 2179
2122 2549
2131 2602
2484 2352
2428 2154
2556 2607
2315 2133
2472 2047
2090 1986
2436 2491
2560 1997
2123 2290
2103 2108
2117 2544
2153 2643
2054 2068
2543 2191
2326 1918
2467 2374
2501 2229
2071 2127
2134 2315
2308 1941
2552 2460
2283 2047
2353 1993
2273 2199
1577 2241
2165 2499
2629 2169
2140 2218
1718 2268
2340 2188
2159 1951
2635 2379
2203 2138
2354 2086
2329 2324
2561 2625
2244 2404
2408 2354
2408 2586
2560 2423
2142 2602
2065 2154
2031 2270
2104 2551
2047 1948
2112 1985
2631 2040
2374 2607
2563 2299
1718 1940
2460 2069
1993 2299
1953 2115
2631 2124
2117 2302
2222 1982
2244 2058
2005 2354
2635 2280
2395 2095
2261 2201
2482 2266
2323 2095
2646 1983
2614 2051
2235 2110
2460 2040
2148 2199
2138 2333
2073 2464
2609 1920
2206 2064
2180 2133
2578 2646
2299 2088
2039 2512
2564 2261
2266 2467
1932 2125
2532 1983
2190 1925
2406 2325
1962 2611
2124 2140
1979 2404
2631 2078
2606 2464
1943 2404
2007 2383
2601 2552
2112 2275
2284 1999
2271 2370
2244 2086
2319 2347
2301 2487
2597 2268
2488 1933
2141 2211
2078 2179
2381 1979
2560 2292
1465 2649
2323 2602
2370 2504
2467 2043
1984 2142
2279 2394
2118 2376
2549 2108
2582 2292
2638 2240
2381 2624
2626 1951
2623 2478
2103 2430
2615 2005
2612 2145
2593 2579
2353 2630
2498 2038
2072 2053
2122 2090
2179 2625
2603 2610
2210 2492
2069 2410
2058 2594
2345 2117
2423 2045
2155 2328
2220 2477
2128 2138
2282 1465
1940 1994
2410 2478
2240 2121
2508 2149
1985 2150
2122 2261
2086 2500
2213 2331
2045 2575
2446 2229
2140 2213
2407 2266
2244 2124
2589 2224
2564 2613
2308 1984
2500 1979
1954 2555
2124 2374
2063 2240
2061 1914
2140 1918
2074 2564
2059 2370
2598 2508
1962 2391
2170 2255
2601 2037
2150 2500
2144 2336
2419 2322
1940 2233
2157 1928
2159 2225
2343 2068
2090 1979
2324 2098
2063 2307
2186 2367
2150 2381
2549 2045
2074 2369
2597 2649
2465 2183
136 2451
2381 2550
2625 2184
2062 2398
2032 1948
2352 2601
2072 2417
2149 2642
2084 2216
2604 2543
2625 2418
2125 2273
2172 2326
2395 2093
2090 2423
2600 1943
2068 2491
2369 1925
2060 2501
2093 2206
1926 2038
2354 2381
2121 1953
2164 2229
2398 2148
2121 2423
2464 2423
2589 2445
2406 2145
2560 2140
2147 2376
2179 2233
2264 2377
2278 2500
2410 2395
2608 2417
2084 1997
2187 2111
2617 2616
2206 2536
2020 2329
2264 2111
2410 2200
2340 2623
2509 2332
2103 2611
2115 2275
2556 2278
2498 2581
2132 2128
2148 2138
2153 2629
2543 2033
2139 2591
2292 2057
2559 2020
2163 2060
2538 2157
2642 2480
2423 2218
2415 1939
2393 2234
2153 2609
2488 2231
2498 2351
2571 1994
2339 2220
2302 2468
2073 2308
2045 2078
2268 2009
2180 2592
2492 2093
2206 2340
2064 2386
2319 2279
2468 2374
2074 2532
2233 2485
2648 2009
2384 2189
2312 2355
2332 2543
1991 2006
2510 2183
2542 2600
2299 2624
2069 2478
2283 2062
2047 2250
2139 1985
2526 2275
2122 2507
1959 1981
2072 2347
2206 2244
1993 2220
2511 2491
2309 2551
2064 1962
2469 2334
2088 2030
1918 2033
2507 2261
2150 2118
2083 2103
2058 2590
2150 2073
2064 2607
2273 2155
2233 1963
2327 136
2270 2425
2537 1945
2433 2233
1954 2368
2512 2002
2404 2615
2228 2614
2630 2108
2561 2137
2133 2125
2560 2064
2116 2022
2461 2338
2058 2546
2176 2598
2098 2499
2370 2064
2464 2433
2586 2142
2379 2594
1994 2319
2043 2546
2309 2521
1963 2201
1941 1971
2642 2283
2629 2567
2131 1943
2405 2248
2040 2046
2592 2042
2264 2394
2112 2030
2063 2429
2132 2629
2030 2123
2145 2416
2206 2552
2069 2109
2404 2179
2200 2229
2184 2323
1946 2520
2370 2600
2604 1925
2111 2543
2489 2188
2145 2117
1945 2394
2189 2427
2133 2475
2078 2084
2073 2059
1986 2266
2304 1939
2609 2117
1966 2446
2374 2507
2319 2183
2296 1964
2590 2631
2179 2404
2395 2507
2107 2314
2417 2241
2586 2184
2315 2135
2308 2489
2205 1923
2339 2507
2123 2590
2190 2392
2135 2239
2512 2135
2489 2237
2326 2468
2139 2206
2283 1932
2228 2313
2560 1993
2290 2331
2199 2325
1929 2578
2052 2598
2289 1916
2633 1914
2033 2560
2339 2074
2206 1997
2289 2053
1976 1999
1971 2386
2001 136
2235 2432
1918 2045
2560 2619
2306 2601
2577 2474
2602 2033
2218 2492
2374 2526
2338 2161
2183 2289
2331 2501
2624 2347
2306 1929
2131 2093
1945 2153
2560 2363
2164 2348
2032 2169
1929 2347
2395 2073
1983 1971
2423 2331
2026 2187
2007 2071
2539 2124
2377 2133
2240 2200
1920 2052
1953 2418
2074 2299
2384 2128
2624 2485
2370 2604
2592 2293
2136 1946
1968 2620
2623 2646
1962 2506
2509 2394
2133 2318
2521 2275
1939 2132
2127 2224
2556 2108
2575 2611
2578 2604
2648 1991
2561 1984
2492 2430
2593 1989
2321 2581
2324 2624
2054 2128
2298 2637
2512 2451
2578 2520
2056 2414
2420 2047
2024 2171
2584 2234
2395 2242
2126 2146
1999 1954
2508 2047
2539 2059
2150 2619
2390 2344
2407 1984
2260 2114
2370 2090
1920 1948
2438 2479
2149 2125
1577 2649
2485 2507
2116 2159
2138 1954
2112 2646
2398 2649
2573 2500
2419 1970
2433 2430
2525 2641
2309 2404
2169 2132
2170 2650
2611 2602
2128 2026
2262 2266
2068 2199
2573 2088
2333 2235
2095 2468
2282 2420
2553 2299
2300 2414
2232 2259
2329 2339
2199 2368
2179 2216
2508 2026
2254 2653
2600 2108
2129 2628
2567 2560
1953 2489
2324 2334
2590 2376
2150 2095
2467 1993
2071 2592
2104 2278
2506 2604
2220 2005
2285 2461
2647 1927
2054 2149
1916 2332
2172 2059
2283 2582
1984 2329
2473 2047
1946 1953
2105 2091
2046 2532
2140 2307
2396 2292
2140 2200
2499 2374
2542 2140
2368 2246
2543 2471
2206 2407
2200 2172
2623 2546
2190 2323
2001 2660
1929 2172
2220 2492
2137 1920
2445 2451
2554 2201
1938 2073
2590 2200
2337 1995
2261 2033
1962 2500
2532 2123
2506 2201
2020 1962
2030 2188
2224 2319
2573 2410
2154 2601
2504 2638
1973 2627
2020 2638
2516 2463
1983 2654
2040 2433
2323 2574
2213 2020
1941 2354
2630 2220
1993 2600
2050 1951
1948 1939
2259 2223
2451 2138
2532 2233
2235 2145
2299 2477
2303 2478
2499 2520
2507 2078
2511 2038
2261 2200
2424 2146
2247 136
2546 2409
2327 2169
2254 2053
2363 2323
2270 2155
2575 2600
2258 2095
2062 2110
2598 2608
1936 2023
2627 2640
2404 1984
2506 2352
1995 2378
2543 1932
1979 2324
2244 2607
2103 2619
2308 2030
2201 2212
2475 2247
2618 2119
2495 2331
1945 2533
2543 2055
2150 2257
2615 2150
2530 2047
2507 2560
2070 2126
2028 2609
2225 2061
2337 2645
2150 1925
2571 1945
2131 2257
1964 2279
2592 2617
2332 2336
2046 2369
2343 2254
2500 2220
2216 2307
2169 2372
2117 2054
1945 1932
2275 2573
2418 2624
2228 2402
2500 2084
2492 2030
2463 2072
2326 2258
2511 2292
1962 2469
2376 2064
2401 2513
2081 2328
2594 2280
2199 2617
2081 1940
1997 2601
2436 2169
1916 2318
2207 2650
2539 2489
2414 2563
2172 2131
2537 2510
2492 2216
2600 2602
2631 2299
2347 2573
2033 2086
2179 2257
2098 2506
2586 2563
2103 2449
2266 2216
2058 2347
2267 2243
2277 2186
2405 2659
2467 2123
2240 2278
1954 2627
2560 2370
2468 2345
2069 2564
2511 2221
2639 2171
2108 2123
2331 2556
2370 2543
2330 2196
2138 2305
2020 2213
2449 2300
2220 2307
2309 2112
2405 2587
2253 2550
2095 2257
1955 2653
1718 2133
1948 2138
2069 2124
2592 2267
2359 2611
2369 2607
2233 2299
2300 2556
2067 2489
2597 2194
2568 2438
2117 1930
2352 2308
2509 1981
2624 2112
2372 2285
2120 2313
2001 1998
2065 2567
2111 2087
2506 2526
2447 1976
2005 2433
1997 2139
2649 2232
1986 2499
2543 2478
2032 2394
2395 2407
2428 2233
2244 2381
2543 2148
2409 2266
2552 2218
2060 2339
1986 2590
2395 2056
2144 2072
2469 2266
2368 2642
2297 2633
1983 2058
2241 2436
1998 1995
2352 1985
2187 2649
1986 2083
2083 2150
1985 2229
1577 1718
2121 2607
2005 2347
2071 2623
2233 2290
2155 2235
2590 2046
2206 2331
2367 1926
2289 2111
2602 2287
2220 2278
2124 2428
2108 2212
2423 2122
2516 2042
2311 2410
2364 2097
2275 1918
2224 2144
1975 2534
2242 1944
2395 2278
2324 2418
2463 2010
2254 2235
1947 2461
2340 2124
2064 2348
2271 2520
2324 2218
2083 2142
2037 2352
2290 2306
2278 2359
2319 1913
2347 2216
2290 2655
2507 2600
2261 2484
2226 2642
2552 2150
2642 2199
2542 2586
2597 2468
2591 2526
2005 2299
2471 2143
2020 2549
2617 2174
2150 2542
2399 2010
2465 2315
2586 2464
2370 2078
2617 2224
2491 2057
2642 2384
2604 2210
2030 2136
2386 1993
2323 2477
2239 2293
2533 2293
2338 1941
1962 2410
2039 2180
2123 2554
2631 2504
2396 2221
1985 2369
2399 2608
2150 2611
2532 2240
1926 2510
2573 2275
2047 2259
2118 1929
2194 2533
2433 2446
2095 2326
2003 2075
2311 2340
1966 1946
2488 1960
2615 2552
2045 2623
2137 2543
2030 1993
2399 1465
2329 2077
2340 1938
1987 2087
2247 2133
2083 2615
2369 2576
2550 1938
1947 2132
2590 2554
2495 2142
2108 2307
2625 1938
2356 2086
2124 2046
2198 2642
2324 2103
2054 1954
1938 2602
1938 2206
2495 2064
2143 2137
1983 2074
2554 2043
1960 2411
2464 1918
2542 2078
1918 2554
2020 2546
2184 2212
2311 2179
2223 2501
2586 1963
1979 2309
2039 2555
2464 2045
2135 2224
2564 2063
2460 2356
2556 2060
2068 2367
2010 2068
2123 2374
2368 2155
2230 2283
2140 2323
2246 2302
2489 2625
2045 2600
2308 1929
2407 2395
2259 2372
2446 2504
2567 2127
2061 2225
1943 1963
2460 2059
2210 2244
2235 2222
2460 2309
1986 2611
2200 1938
2368 2324
2637 2399
2115 2553
2218 2078
2196 2384
2117 2137
1938 2532
2376 2190
2367 2117
2190 2404
2224 2333
2346 2284
2233 2045
2240 1943
2333 2144
2563 2564
2047 2031
2419 2031
2604 1986
2052 2328
2526 2165
2561 2210
2153 2653
2218 2506
2646 2560
2109 2500
2246 2203
1946 2216
1999 2620
2561 2492
2543 2240
2140 2030
1954 2102
2464 2124
2323 2220
2600 2104
2093 2324
1942 2044
2653 2451
2054 2592
2559 2619
2116 1998
2460 2154
2253 2578
2385 2057
2500 2118
2604 2477
2371 2089
2384 2028
2138 2149
2068 2189
2428 2495
2077 1917
2174 2463
2213 2467
2609 2543
2222 2603
1971 2179
2138 2643
2384 2649
2093 2308
1995 1914
2142 1983
2608 2289
2630 2339
2537 2007
2233 2142
2491 1948
2307 2638
2110 2328
2418 2339
2516 2128
1923 2325
2464 2526
2510 2133
2063 2347
2511 2434
2009 2365
2616 2312
2600 2546
2340 2407
2624 2559
2521 2121
1971 2500
2347 2356
2258 2520
2347 2183
2279 2039
1920 2137
2292 2161
1979 2020
2585 2346
1959 2039
1949 2173
2216 2275
2140 2655
2127 2512
2299 2526
2054 2508
2369 1946
1947 2471
2054 2479
2278 2607
2526 2655
2410 2428
2374 1993
2477 2546
1916 2649
2604 2354
2649 2328
2552 2033
2033 2090
2307 2090
2190 2290
2172 2504
2492 2172
1984 2220
2629 2398
2088 2257
2292 2629
2073 1946
2047 2328
1948 2187
2642 2419
2643 2289
2361 2503
2074 2040
2367 2026
2394 2223
2162 2156
2151 2087
2123 2604
2240 2504
2283 2420
2327 2511
1986 2559
2203 2102
2410 1966
2391 2088
1985 2363
1985 2575
2339 2553
2308 2184
2345 2468
2542 2165
2447 2648
2095 2121
2239 2038
2294 2475
2206 1942
2302 2247
2087 2608
2430 2563
1945 1718
2354 2093
2605 2643
2154 2593
2368 2198
2649 2501
2046 2630
1914 2000
2306 2550
1994 1940
2030 2271
2153 2247
2124 2352
2440 2129
2646 2200
2043 2579
2638 1979
2069 2172
2520 2590
2087 2589
2292 2053
2098 2115
2370 2045
2604 2218
2376 2430
2578 2278
2299 2586
2313 2618
2307 2381
2276 2464
2510 2134
2319 2143
2032 2597
1946 2550
2484 2118
2560 2095
2069 2131
2053 2087
2078 2549
2034 2041
2520 1917
2516 2336
2179 2154
2563 2093
2341 2412
2407 2172
2218 2210
2102 2134
1928 2268
1956 2301
2028 2068
2278 2602
2047 2512
1995 2268
2308 2578
2247 1577
2054 2148
2279 1985
1985 2109
2367 2223
2638 2602
2468 2259
2261 2122
2121 2324
2081 2385
2564 2561
2506 2299
2294 2304
2520 2115
2602 2532
2543 2210
2323 1917
2506 2369
2549 2615
2555 1916
2326 2352
2203 2087
2084 2520
2533 1921
2295 2642
2428 2088
2064 2324
2268 2385
2361 2618
1945 2144
2102 2491
2010 2516
2184 2311
2184 2593
2623 2500
2478 2303
1929 2574
2131 2300
2088 1953
1718 2294
1985 2521
2029 2294
2434 2327
2387 2427
2150 2300
2234 2429
1941 2617
2040 2278
2237 2121
1971 2104
1946 2093
2492 2092
2346 2659
2464 2590
2577 2023
2506 1963
2241 2588
2300 2123
2032 2571
1929 2646
2451 2289
2088 2619
2189 2283
2255 2650
2533 2268
2344 2438
2436 1940
2093 2423
2220 2165
2198 2328
1965 2166
2212 2290
2363 2615
2552 1997
2037 2121
2161 2543
2142 2040
2196 2169
2646 2339
2639 2022
2005 2326
2090 2124
2180 2187
2620 1927
2647 1919
2610 2581
2043 2553
2037 2233
2655 2539
2343 2032
2216 2124
2183 2468
2631 1983
2468 2056
2509 2475
2244 2257
2631 2275
2537 2438
2369 2218
2347 2153
2512 2174
2239 2372
1986 1985
2045 1986
2531 2557
2456 2313
2052 2194
2040 2261
2020 2045
2142 2395
2416 2145
2438 2029
2653 2187
2509 2161
2278 2611
2035 2236
2138 2461
2423 2164
2188 1983
2233 2109
2233 2261
2273 2283
1979 2546
2253 2142
2191 2543
2093 2201
2241 2039
2573 2348
2495 2414
2300 2404
2307 2324
2555 2328
1577 2137
2254 2594
2623 2550
2162 2126
2309 1985
2625 2115
2492 2109
2064 2560
2112 2103
2323 2040
2631 2108
2282 2351
2261 2625
2509 2327
2030 2233
2543 2408
2484 2233
2182 2480
2240 2631
2010 1932
2190 2108
2293 2384
2125 2026
2063 2363
1941 2573
2449 2512
2218 2654
2625 2084
2171 1957
2047 2516
2040 2392
2533 2028
1962 2340
2064 2613
2471 2149
2061 1958
2590 1918
2511 2250
1994 2187
2521 2037
2336 2199
2211 2327
2035 2361
2381 2339
2002 2498
2180 2510
2244 2064
2232 2241
2630 2290
2077 2446
2073 2172
2054 2347
2132 2537
2183 2191
2507 2506
2329 1938
2633 2647
2625 2200
1986 2526
2254 1923
2254 2458
1985 2278
2203 2038
2125 2319
2536 2500
2314 1975
2320 2650
2611 1986
2138 1932
2344 2087
1942 2476
2522 1955
2183 2333
2606 2560
2319 2199
2619 2359
2278 2253
2473 2194
2047 1994
1926 1941
2504 2104
2187 2463
1918 1941
1983 2118
2420 2143
2088 2521
2169 2292
2374 2326
2604 2244
2022 1921
2302 2332
2482 2056
2363 2115
2463 2138
2624 1971
2345 2259
2393 2499
2509 2183
2271 2348
2346 2171
2602 2489
2482 2600
2225 2640
2138 2597
2615 2142
2485 2543
2525 1923
2504 2078
2300 2374
2518 2243
2615 2630
2435 2192
2560 2593
2526 2654
2463 2544
2060 2324
2083 2556
2165 2579
2090 2005
2507 2190
2152 2008
2098 2188
1986 1984
2418 2340
2287 2184
2340 2433
2005 2218
2553 2098
2212 2550
1917 2485
2372 2117
1718 2032
2307 2369
2102 2032
2038 2031
2112 1953
2420 1577
2467 2590
2109 2564
2352 2353
2364 1958
2083 2266
2064 1985
1959 2196
2389 2346
2521 2611
1941 2059
1946 2063
2323 1918
2194 2117
2389 2312
2267 2254
2102 2224
1970 2479
2410 2374
2289 2612
2381 2276
1984 2623
2318 2133
2602 2615
2625 2556
2348 2638
2464 2109
2074 1986
2359 2261
1985 1941
2212 2376
2160 2361
2381 2409
2233 2354
2001 1976
2356 2359
2592 2138
1954 2491
2553 2376
1943 2172
2604 2329
2161 2592
2294 2544
2003 2062
2261 2578
2554 2492
2047 2080
2564 2309
2123 2037
2566 2473
2386 2005
2510 1994
2561 2103
2297 1921
1941 2199
2033 2212
2067 2092
2555 2189
2164 2601
2102 2344
2055 2376
2589 2133
2040 2543
2359 2655
2155 1718
2045 2334
1929 2552
2394 1947
2145 2186
2189 2327
2328 2183
2567 2347
1999 2171
2533 2420
1971 2276
2319 2616
1960 2173
2095 1993
2040 2212
2192 2157
2658 2645
2123 2467
2206 1984
2300 2464
2140 2108
2180 2434
2489 2464
2346 2645
2117 2209
2229 1986
2423 2139
2064 2561
2348 2339
2327 2508
2306 2088
2443 2527
2200 2307
2619 2309
2543 1946
2166 2371
2117 2081
2028 2629
2309 2561
2179 1993
2174 2610
2571 2018
2122 1997
2095 2504
2002 2196
2124 2655
2501 2003
2050 2171
2290 1983
2494 2378
2104 2369
2583 1951
2475 1941
2324 1925
2553 1985
2451 2333
2317 2411
2030 2553
2564 2591
2604 2370
2392 2507
2526 2140
2553 1986
2033 2347
2104 2607
2410 2500
2526 2150
2216 2266
2387 1946
2629 2117
2532 2088
2594 2189
2098 2118
2063 2275
2451 2075
2174 2038
2290 2093
2108 2374
2055 2575
2552 2542
2552 2064
2223 2333
2213 2464
2254 2189
2611 2423
1577 2436
2119 2397
2142 2216
1985 2108
2590 2142
2149 2038
2266 2095
2138 2385
2257 2240
2086 2059
2328 2616
1979 2407
2464 2142
2340 2103
2299 2560
2619 2536
1465 2285
2090 1993
2542 2329
1965 2286
2520 2370
2014 2225
2077 2290
2526 2237
2173 2248
2083 2410
2616 2068
2309 2056
2241 2445
2376 2619
2649 2038
2309 2306
2058 2150
2543 2560
2592 2010
2369 2093
2419 2582
2018 2013
2451 2420
2611 2088
2489 2654
2502 2533
2139 2356
2476 2410
2292 2471
2559 2299
2118 2229
2611 2575
2187 2510
2438 2451
2163 2125
2399 2242
2311 2500
2237 1993
2331 2348
2136 2088
2150 2467
2623 2240
1954 2241
2043 2376
2157 2364
2636 136
2353 2550
2590 2045
2244 2210
2308 2654
2056 1971
1971 2244
2095 2552
1982 1988
2551 2408
2352 2266
1993 2619
2149 2039
2033 2564
2625 2575
2597 2289
2267 2215
2147 2083
2617 2451
2409 2037
2117 2199
1577 2333
1951 2645
1718 2132
2047 1577
2578 2381
2398 2461
2133 2047
2647 2538
2366 2031
2586 2542
2601 2408
2552 2030
2253 1941
2546 2290
2220 2059
2068 2247
2418 2392
2247 2187
2084 2220
1918 2549
2643 2125
2240 2564
2573 1941
2500 2329
2039 2598
2142 2549
2287 2033
2420 2259
2471 2151
2654 2200
2402 2361
2556 2334
2229 2611
2601 2374
2233 2108
2656 2181
2127 2031
2078 2359
2032 2304
2528 2621
2492 2484
2244 2433
2077 2347
2482 2613
2579 2624
2533 2543
2507 1918
2609 2071
2046 2142
2419 2174
2646 2504
2292 2215
2340 2559
2352 2074
2423 2200
2633 2297
2438 2111
2205 2209
2336 2555
2200 2020
1929 2354
2188 2307
2057 2302
2537 1926
2399 2273
2551 2418
2598 2491
2210 2578
1918 2069
2283 2629
2329 1985
2227 2534
2274 2333
2468 2521
2578 2638
2549 2124
2616 2333
2043 2625
2212 2275
2203 2292
2381 2201
2011 2459
2610 2612
2653 2267
2637 2344
2592 2629
2566 2211
1943 2290
2598 2516
2374 2308
2372 2398
2121 2030
2504 2615
2567 2516
2507 1983
2218 2469
2616 2653
2325 2328
2381 2309
2387 2347
1968 1954
2213 2308
1920 1959
2654 1946
2454 2631
1577 2198
2164 2484
1929 2064
2076 2207
2384 2510
2553 2404
2199 2629
1966 2352
1979 2526
1938 2430
1963 2655
1959 1920
2340 2278
2462 2081
2040 2276
2283 2398
1921 2116
2552 2363
2327 2232
2597 2384
2254 2199
2184 2407
2073 2408
2035 2366
1577 2582
2500 1971
2617 2338
2393 2060
2280 2336
2059 2654
2419 2246
2532 2136
2408 2326
2268 2617
2223 2038
2559 2340
2626 2006
2271 2468
2351 2233
2601 2098
2390 2509
2500 2593
2164 2492
1935 1980
2067 2646
1968 2365
2642 2144
2261 2654
1966 1962
2468 2573
2552 2414
2649 2072
2622 2349
2601 2624
2084 2020
2088 2381
2370 1962
2504 2520
2043 2086
2243 2125
1975 2313
2165 2410
2246 2198
2309 2615
2623 2507
2635 2436
2292 2266
2292 2208
2594 2328
2289 2406
1718 2589
2132 2294
2144 1920
2122 2578
2073 2165
2098 2046
2285 2472
2575 2601
1938 2370
2191 2516
2324 2363
2657 2626
2598 2176
2600 1925
1914 2097
2590 1953
2574 2381
2400 2389
2485 2331
2253 2200
2233 2073
2511 2419
2059 2331
2542 2073
2631 2506
2395 2184
2610 2047
2111 1932
2590 2206
2184 2611
2600 2040
2233 2550
2586 2103
2571 2032
2093 2244
2434 2161
2434 2101
2616 2529
2154 2218
2268 2285
2047 2406
2408 2407
1577 2589
1986 2112
2190 1963
2579 2184
1966 2573
2323 2414
2334 1946
2153 2151
2087 2336
2290 2069
2331 2257
2288 2350
2167 2535
2307 2266
2212 2539
2040 1993
2086 2206
2475 2347
2551 1989
2115 2200
2039 1955
2091 1934
2533 2436
2293 2028
2486 2622
2179 2266
2485 2339
2558 2113
2150 2551
2198 2250
2142 2500
2629 2328
2495 2543
1718 2246
2588 2047
2140 2210
2118 2058
2354 2526
2004 2192
1971 1979
2257 2276
2539 2136
2339 2546
2539 2654
2090 2290
2217 2448
2209 2270
1971 1983
2415 2081
2183 2032
2240 2218
2338 2496
2551 1985
2575 2655
2030 2630
1939 2304
2150 2623
2574 2556
2201 2184
2624 2526
2300 2395
2603 2176
2543 2276
2575 2340
1939 1916
1971 2331
2381 2063
2183 2518
2607 2549
2469 2300
2005 2376
2275 2433
2499 2090
2348 2201
2072 2279
2042 2629
2586 2495
2308 2206
2216 2542
2500 2271
1917 2131
2446 1963
2108 2164
1465 2007
2410 2331
2507 2348
2143 2159
2642 2010
2172 2354
2477 2233
2543 2559
1953 2326
2604 2500
2468 2433
2078 2229
2385 2398
2044 2499
2604 2123
2560 2500
2007 2601
2279 2399
2097 2658
2148 2128
2279 2068
2206 2323
1918 2095
2300 2383
2555 2196
2285 2608
2199 2547
2374 1962
2575 2546
2068 1947
1946 2005
2436 2343
1718 2508
1989 2410
2229 2433
2564 2495
2064 2266
2556 2059
2077 2139
2090 2142
2417 2537
2300 1986
2212 2090
2588 2336
2625 2646
2599 2144
2109 2369
2655 2460
2058 1979
2623 2290
2348 2601
2092 2303
2524 2499
2154 2646
2550 1953
2184 2244
2101 2221
2414 2376
2438 2053
2030 2356
2183 2002
2465 2592
2255 1992
2118 2359
2175 2176
2392 2300
2526 2591
2399 2419
2164 2043
2266 2631
2268 2072
2272 2318
2142 2063
2005 2654
1941 2604
2188 2593
2592 2608
2482 2381
2017 1996
2438 2332
2462 2115
2559 2212
2028 2133
1995 2024
2030 1917
2308 2386
2629 1994
2319 2511
2007 2147
2578 2090
2352 2410
2289 2637
2136 2638
2078 2484
2328 2304
2429 2546
2363 2352
2275 2216
2398 2629
2104 2045
1917 2526
2111 2232
2063 2069
2323 2233
2056 2476
1914 2061
2210 2559
2072 1954
2323 2591
2112 2446
2084 1985
2233 2526
2537 2127
2188 1918
2384 2224
2461 2333
2456 2541
2429 2328
2617 2344
1941 2561
2500 2073
2257 2539
2165 1938
1920 2144
2185 2149
2142 2331
2629 2343
2489 1943
2007 2019
2443 2584
2112 2323
2241 2071
2358 2283
2038 1923
2062 2511
2338 2125
2275 2561
2451 2235
2619 2551
2132 1947
2507 2165
2304 2226
2149 2343
2343 2132
2111 2071
2529 2502
2611 2206
2300 2299
2064 2586
2104 2240
2464 2561
2462 1946
2109 2140
2323 2408
2033 2500
2309 2611
2344 2617
2506 2104
2610 2141
2300 2201
2278 2213
2458 1920
1970 2243
1997 2526
2607 2520
2560 2253
2600 2212
2250 2128
2196 2461
2508 2338
2308 2550
2564 2554
2063 2007
2659 2583
2229 2139
2140 2124
2328 2138
1971 2575
2330 2133
2294 2151
2154 2559
2602 2485
2390 1981
2642 2518
2072 2592
2356 2290
2123 2339
2078 2069
2433 2324
2647 1935
2006 1973
2109 2376
2206 2619
2616 2038
2492 1953
2023 2129
1932 1920
1962 2553
2043 2561
2121 1929
2084 2353
2374 2043
1983 2563
2394 2194
2087 2149
2646 2383
2567 2327
2449 2103
2326 2201
2117 2191
2190 2074
2384 2292
2266 1985
2462 2308
2139 2446
2054 2434
2087 2420
2369 2278
2579 1993
2118 2323
2006 1968
2060 2242
2332 2592
2574 2275
2532 1962
2100 2313
1955 2327
2040 2564
2290 2083
1943 2240
2164 2088
1979 2046
2589 2249
2344 2138
2573 2624
2007 2428
1916 2289
2147 2078
2052 2289
2042 2463
2199 2432
2278 2590
2246 2377
2103 2646
2160 2412
2323 2539
2112 2464
2334 2395
2295 2502
2220 2326
2611 2600
2404 2579
2423 2526
2633 1951
2161 2501
2045 2539
2508 2153
2499 2574
2307 2069
2347 1577
2118 2244
1962 2030
2543 2081
1943 2323
2057 2199
2020 2553
2059 2095
2344 2415
2112 2573
2559 2423
2087 2117
2616 2389
2233 2359
2326 2477
2434 2169
2429 2590
1962 2063
2151 2187
2386 2586
2319 2496
1962 2088
1918 2266
2550 2564
2070 2361
2275 2429
2309 2586
2649 2071
2623 2414
2520 2257
2123 2084
2224 2643
2002 2419
2068 2571
2176 2642
2188 2460
2324 2489
2477 2414
2619 2630
2090 2391
2604 2154
2624 2329
2221 2394
2061 2636
2064 2370
2498 1923
2533 2384
1984 2430
2259 2333
2025 2097
2131 2619
1913 2127
2508 2292
2236 2405
2290 2271
1983 2430
2232 2289
2598 1465
2423 2564
2211 2612
2619 2543
2659 1958
1966 2190
2143 2592
2323 2098
2258 2037
2471 2282
2018 2192
2151 2468
2136 2428
2150 2550
2588 2203
2040 2121
2625 2063
2538 1980
2122 2088
2140 2477
2275 1943
2549 2392
2112 2073
2171 2004
2644 2488
2134 2081
2240 2020
2485 2591
2068 2417
2471 2183
2329 2139
2297 1935
2400 2127
2601 2409
2021 2103
1966 2462
1940 2328
2506 2329
2475 2087
2002 2087
2433 2574
2631 1993
2576 2184
2190 2469
2176 2637
2215 2254
2597 2081
2233 2590
1999 1968
2020 2369
2253 1943
2186 2473
2332 2102
2339 2381
2007 2597
2199 2003
2381 2275
2460 2150
2554 2600
2347 2128
2537 2432
2504 2136
2549 2139
1940 2264
2509 2029
2332 2315
2381 2257
2378 2365
2131 2165
2482 2090
2414 2638
2097 2006
2207 2320
2591 2244
2088 2391
2353 2386
2271 2033
2356 2409
1994 2510
2372 2153
2350 2026
2542 2124
1979 2060
1984 1929
1465 2081
2174 1577
2372 2254
2575 2423
2103 2150
2521 2551
2430 2088
1983 2122
2604 2088
2136 2184
2090 2575
2395 2559
1989 2542
2153 2144
2231 2129
2108 2495
2467 2150
2650 2486
1925 1917
2551 2040
1931 2011
2435 2050
2239 1577
2231 2523
2127 1926
2410 2586
2590 2559
2430 2363
2128 2075
2246 2047
2142 2069
2364 2006
2266 2056
2315 2053
1978 2047
2398 2053
2404 2086
1917 2139
2054 1970
2054 2594
2309 2556
1946 2237
2495 2188
2059 2093
2471 2250
2533 2135
2331 2623
2484 2624
2491 1955
2570 2301
2648 1957
2560 2376
2574 2033
2145 2325
2078 2556
2210 2560
2575 2201
1943 2073
2365 2157
2526 1953
2201 1966
2652 2161
2460 2464
2102 2347
2095 2630
2451 2279
2078 2407
2654 2484
2553 2615
2126 1965
2242 2141
2428 2408
1959 1947
2622 2444
2369 2104
2507 1993
2446 2363
2338 2279
1928 1976
2306 2482
2510 2333
2410 2190
2266 1962
2449 2234
2088 2200
2347 2319
2104 2506
2648 2657
2014 2626
2427 2454
2334 2611
2497 2503
2279 2420
2110 2072
1993 2500
2520 2611
2213 2261
2471 2344
2489 2560
2617 2491
2144 2463
2254 2081
2423 2404
2236 2023
2266 2030
2551 2266
2172 2386
2098 2172
2108 2550
2521 2339
2213 2607
2516 1932
2018 2000
2266 2532
2575 2352
2594 2394
2414 2500
2589 2537
2346 2027
2128 2479
2268 2406
2196 2247
2347 2386
2352 2306
2184 2077
2132 2475
2037 2485
2271 2347
2088 2043
2407 2655
2550 2428
2629 2052
2158 2523
2602 1918
2546 2233
2543 2370
2435 2171
2090 2115
2384 2400
1932 2183
2397 2488
2649 2138
2610 2270
2468 2151
2550 2602
2594 2176
2201 2370
2233 2642
2351 2246
1990 2335
2423 1985
1965 2335
2377 2394
2423 2625
2519 2336
2604 2058
2253 2356
2101 2053
2144 2617
2142 2276
2549 2103
2546 2033
2247 2289
2112 1997
2037 2408
2292 2509
1940 2039
2363 2507
2117 2310
1938 1985
2344 2187
2537 2199
2037 2033
2275 2124
2589 1577
2533 2292
2253 2059
2423 2409
1962 2278
2190 2276
2088 2244
2559 2121
2125 2498
2354 2112
2458 2384
2276 2560
2069 1985
2557 1923
2133 2143
1985 2253
2395 1983
2660 2097
2046 2184
2359 2619
1979 2098
2390 2222
2433 2121
2573 2218
2229 2165
2033 2213
2306 2546
2225 1991
2306 2638
2434 2384
2278 2229
2484 2495
2458 1952
2491 2279
2463 2273
2231 2628
2387 2218
2200 2429
2190 2088
2586 2334
1975 2368
2104 2084
2088 2347
2582 2002
1994 2111
2340 2046
2163 2054
2095 2115
2010 2588
2390 2075
2244 2136
2231 2361
2278 2369
2133 1577
2491 2144
2500 2124
2324 2216
2370 2546
2137 2506
2319 2137
2073 2646
2220 2392
2539 2404
2028 1947
2282 2609
2406 2031
2056 2564
2103 2563
2155 2149
2654 2276
2111 2267
2275 2020
2357 2181
2384 2208
2098 2088
2434 2582
2654 2083
2069 2606
1929 2561
2331 2520
2573 2576
2133 2031
2319 2203
2218 1966
2109 2165
2131 2611
2598 2144
136 2199
2327 2222
2246 2629
2002 2153
2542 2495
2039 2642
2005 2201
2278 2520
2475 2588
2026 2007
1958 2159
2201 2276
1963 2485
2153 2053
2172 2200
2276 2045
2428 2188
2220 2078
2313 2162
2139 2489
2111 2028
2201 1918
2638 2625
2103 2404
2134 2567
2081 2445
2500 2093
2216 1953
2551 2275
2625 1986
2115 2218
2631 2574
2108 2118
2547 2458
2592 2180
2127 2355
2588 2117
2226 2048
2331 2630
2072 2594
2615 2504
1943 2201
2533 2068
2379 2367
2068 2038
2478 2300
2436 2068
1979 2329
1926 2191
2560 2646
2579 2271
2115 2339
2567 2537
2118 2370
2062 1952
2500 2347
2088 2564
2154 2123
2594 2417
2004 1914
2328 2511
2489 2482
1948 2472
1986 2507
2233 2391
2174 1987
2560 2109
2630 2201
2363 2190
2104 2179
2452 1944
2122 2074
2446 2300
2419 2102
2549 2339
2299 2276
2361 1975
2087 2537
2625 2354
2549 2300
2224 2511
2064 2147
2611 2212
2564 2229
2319 2328
2098 2324
2543 2551
2344 2111
2560 2600
2073 2188
2508 1954
2500 2495
2579 2574
2223 2054
2326 2290
2619 2064
2148 2543
2404 2526
2598 2250
2171 1927
2496 2398
1932 2372
2028 2102
2123 2063
1985 2045
2037 2122
2279 2516
2194 2138
2142 2601
2653 2254
2053 2235
1951 2097
2381 2563
2160 2313
2259 2608
2477 1962
2088 2095
1964 2296
2597 2127
2351 2420
1941 2309
2508 2333
2292 2151
2047 2319
2163 1577
2140 2590
2625 1971
2232 2598
2409 2560
2326 2563
2300 1918
1951 1973
2324 2370
2199 2127
2642 2416
1920 2039
2055 2446
1465 2194
2363 1946
2518 2142
2007 1959
2184 2201
2158 2231
2071 2068
2073 2213
2553 2290
2598 2052
2477 2064
2574 2410
2164 2300
2053 2398
2149 2241
2583 1998
2318 1926
2059 2489
1941 1577
2607 2386
2575 2506
2184 2123
2336 1954
2347 2030
2467 2600
2534 2503
2428 2607
2237 2591
2124 2240
2142 2213
2240 2606
2098 2220
2250 2333
2275 2340
1988 2443
2271 2418
2371 2023
2384 2343
2180 2598
2644 2070
2511 2509
2087 2293
2327 1970
2433 2184
2208 2333
2134 2471
2188 2060
2001 2472
2366 2406
2393 2056
2552 2058
2510 2330
2049 2047
2504 2020
2495 2043
2616 2355
2619 2037
2520 1938
2557 2328
1917 2573
2460 2638
2038 2224
2278 2164
2564 2550
2601 2188
2393 2258
2625 1979
2391 2623
2081 2026
2028 2128
2250 2461
2153 1970
2093 2172
2578 2492
2526 2334
2462 2630
2132 2199
2093 2275
2638 2356
2077 2220
2469 1946
2438 2132
2112 2109
1941 2101
2253 2088
2323 2655
1917 2098
2625 2334
2485 2154
2176 1970
2294 2101
2395 2237
2461 2294
2347 2526
2297 2018
2057 2332
2229 2462
2386 1946
2293 2039
2138 2032
2542 2131
2123 2240
1983 2043
2601 2078
1938 2408
2319 2081
2625 2190
2640 1927
2525 2325
2600 2552
2139 2499
2092 2492
2045 2655
1946 2164
2086 2073
2518 2199
2333 2377
2095 2352
2381 2112
2053 2068
2610 1944
2582 2282
2375 2439
2104 2206
2233 2244
2169 2054
2257 2055
2179 1979
2004 1995
2077 2123
2125 2519
2460 2142
2037 2427
2029 2333
2512 2044
2206 2356
2550 2611
2000 2337
2339 2573
2602 2563
2083 2613
2491 2235
2611 1993
2065 2215
2492 2507
2086 2655
1925 2381
2604 2495
2137 2384
2370 2340
2403 2049
1962 2055
2098 2549
2184 2237
2294 2384
2329 2574
2222 2438
2433 2604
2043 2446
1983 2467
2423 2624
2326 2123
2542 2347
2446 2030
2165 1943
2026 2516
2159 2585
2275 2428
1963 2506
1718 2617
2462 2060
2083 2147
2240 2386
1962 1943
2615 2381
1577 2413
2423 2619
2045 2154
2386 2131
2307 2124
2628 2023
2410 2350
2064 2520
2516 2223
2144 2039
2561 2172
2429 2142
2157 2417
2608 2398
2428 2591
2579 2210
2007 2604
2278 1963
2511 2396
2150 2090
1941 2054
2074 2307
2115 2586
2508 2398
2327 2032
2347 1962
2103 2359
2244 2213
1944 2416
2249 2558
2316 2193
2560 2408
2434 2432
2328 2053
2153 1947
2032 2338
2638 1963
2237 2139
2096 2509
2630 2410
2624 2326
2462 2276
2559 2123
1935 1999
2045 1918
136 2267
2199 2616
2419 1964
2069 2307
2608 2065
2157 2202
2146 2126
2210 2098
2521 2233
2154 2464
2491 2463
2571 2472
2243 2390
2465 2054
2129 2317
2567 2511
2019 2037
2407 2220
2019 2234
2064 2083
2086 2037
2201 2334
2560 2478
2072 2199
2111 2399
2410 2520
2122 2504
2322 2114
2305 2572
2395 1979
2257 2347
2172 2083
2372 2259
2420 2617
1949 2126
2081 2432
1985 2244
2044 2454
2087 2547
2189 2149
2253 2374
2121 2492
2267 2509
1940 2555
2549 2591
2485 2395
2056 2266
1983 2423
2144 2038
2068 2053
2043 2064
2346 1980
2512 2268
2132 2451
2229 2179
2496 1465
2067 2262
2124 2253
2038 2555
2030 2083
2267 2081
2546 2218
2039 2511
1933 2160
2504 2404
2439 2558
2615 2646
2507 2489
2654 2507
2579 2046
2329 2266
2603 2111
2115 2098
2245 2301
2211 2036
2249 2174
2464 2307
2093 1971
2353 2290
2619 1946
2383 2340
2244 2098
2135 2372
2216 2334
2218 2093
2410 2352
2172 2309
2642 2111
2468 2563
2395 1971
2037 2090
2495 2553
2352 2506
2061 2583
1985 2059
2615 1941
2526 2356
2199 2292
2356 2154
1970 2318
2526 2392
2222 2101
1971 2073
2218 2266
2121 2602
2025 2659
2024 2640
2336 2174
2323 2353
2591 2030
1943 2374
2043 2543
2024 2001
2419 1947
2410 2104
2131 2278
1970 2419
2327 2351
2560 2108
2488 2091
2458 2117
2126 2047
2039 2102
2544 2629
2368 2471
2660 136
2043 2574
2465 2471
2306 2409
2278 2410
2210 2131
2369 2154
2363 2374
2027 2645
2103 2593
2007 2589
2495 2353
1953 2464
2508 2537
2475 2343
2492 2630
2136 2307
2419 2189
2464 2059
2093 2552
2356 1993
2086 2140
2278 2408
2546 2108
2331 2020
1959 2047
2154 1993
1920 2072
2469 2257
2381 2655
2556 1962
1920 1939
2282 2343
2638 2408
1925 1929
2254 2068
2323 2340
1985 2532
2574 2460
2625 2573
2575 1993
2383 2564
1955 2222
2324 2539
2081 2071
2239 1465
1970 2368
2586 2331
2336 2302
2583 136
1938 2552
2549 2112
2229 2485
2241 1940
2189 2266
2092 2058
2478 2611
2184 2307
2646 2615
2093 2190
2308 2098
1984 2631
2408 2339
2164 2005
2033 1946
2567 2496
2368 2151
2506 2561
2117 2315
2345 2036
2395 1986
2655 2121
2478 2229
2001 2647
2384 2003
2475 2007
2398 1465
2102 2223
2229 2369
2294 1718
2107 2260
2261 2521
2348 2600
2619 2206
2043 2504
2653 2472
2469 2121
2164 2172
2170 2466
2479 2537
2135 1465
2539 2340
2484 1918
2052 2169
1948 1940
2352 2253
2229 1989
2356 2370
2115 2257
1981 2235
2176 2242
2410 2308
2276 2142
2325 1944
2220 2139
2030 2090
2081 2543
2259 2394
2302 2510
2302 2336
2224 2289
2324 2118
2472 2333
2364 1972
2213 2074
2579 2043
2292 2127
2557 2270
1927 2001
2047 2530
2438 2328
2271 2623
2070 2570
2220 2200
2132 2432
2561 2164
2560 2564
2063 2578
2128 2512
2091 2317
2495 2604
1943 2147
2398 1577
1913 2531
2317 2120
2385 1465
1947 2458
2471 2002
2272 2310
2446 2623
2015 2156
2545 2391
2379 2187
2433 2340
2654 2404
2172 2409
1938 1943
2268 2032
2315 1932
2157 2225
2414 2253
2550 2601
2468 2124
2546 2040
2594 2117
2564 2033
2177 2328
2369 1966
1971 2409
2062 2242
2560 2334
2153 2241
2128 2279
2599 2543
2125 2509
2510 2451
2471 2087
2032 1940
2598 2241
2393 2404
2592 2125
2464 2409
2343 2333
2259 2473
2368 2304
2618 2440
2109 1962
2542 2154
2078 1943
1983 2429
2037 2123
2543 2602
2468 2059
2583 2284
1946 2324
2471 2327
2428 2460
2135 2502
2507 2409
2064 2115
1993 2506
2633 2025
2394 1577
2121 2253
1979 2088
2461 2246
1938 1979
2487 2281
2606 2369
2603 2221
2561 2083
2363 2504
2257 1925
1932 2247
2528 2431
2331 2433
2020 1985
2655 2069
2239 2047
2646 2290
2108 2083
2655 2123
2461 2471
2462 2369
2280 2594
2111 2384
2118 2074
2279 2042
2612 2325
2615 2352
2347 2560
2555 2117
2084 2233
2086 2188
2139 2309
2201 2482
2216 2363
2024 1973
2593 2552
2542 2218
2591 2552
2257 2112
2121 2093
2500 1918
2017 2296
2266 2234
2336 2516
2338 2191
1994 2153
2491 2003
2172 2324
1941 2323
2624 1946
2348 2190
2165 2625
2561 2078
1940 2351
2205 2366
2276 2069
2477 2275
2420 2543
2428 2309
2149 2133
2150 2495
2607 2324
2257 2607
2038 2398
2118 2423
2417 2135
1917 2172
2233 2500
2561 2556
2328 2434
2329 2611
2045 2520
2007 2537
2072 2111
2104 2477
2617 2653
2220 2469
2213 2564
2582 2052
2423 2482
2567 2463
1914 2620
2369 2340
2498 1994
2104 1938
2586 1984
2246 2071
2174 2211
2038 2436
1985 2578
2339 2020
2117 2458
2365 1954
1947 2072
1966 2078
2352 2142
2328 2032
2133 2231
2552 2468
2643 2007
1985 2326
2568 2603
2551 2615
2294 2111
2365 1968
2477 2323
2265 2406
2334 1941
2333 2062
2511 2125
2090 2095
2005 2095
2334 2179
2323 2124
2604 2090
2279 2629
2642 2002
2107 2120
2510 2293
2600 2118
2058 2206
1998 2337
2601 2363
2480 2518
2585 1972
2338 2127
2049 2448
2104 2188
2242 2399
2386 2216
2176 2512
2072 2333
2507 2578
1465 2302
2655 2210
2023 2231
2243 2053
2047 2616
2283 2279
2574 2625
2368 2226
2073 2353
2376 2611
2216 2078
2592 2259
2391 2229
2573 2064
2630 2552
2368 2282
2559 2271
2508 2555
1577 2153
2638 2074
2115 2140
2646 2184
2220 2093
2107 2562
2519 2111
2200 2369
2117 2068
2451 2537
2094 2487
2123 2507
2338 2319
2468 1985
2370 2104
2088 1989
2384 2232
2409 2261
2112 1929
2433 2575
2343 2344
2404 2560
2165 2329
2153 2293
2218 2504
2384 2617
2037 2329
2306 2184
2072 2461
2491 2445
1979 2150
1963 2393
2121 2575
1943 2552
2623 2347
2593 2212
2188 2278
2069 2625
2206 2033
2157 1998
2059 2550
1928 2640
2226 2322
2217 2450
2005 1943
2564 2553
2573 1983
2171 1951
2405 2403
2078 2593
2546 2077
2356 2460
2033 2200
2344 2396
2410 2311
2135 2071
2349 2444
2201 1946
2365 1958
2458 2283
2392 1993
2526 2088
2189 2268
2586 2468
2539 2271
2275 2086
2224 2294
2404 2005
1940 2302
2006 1991
2573 2172
2292 1947
2294 1947
2659 2091
2553 2184
2394 2432
2088 2376
2404 2037
2108 2578
2504 2586
2196 2643
2659 2585
2104 2098
2282 2003
2172 2625
2462 2482
2550 2033
2623 2073
2546 2586
2266 2391
2135 2194
1465 2512
1992 2426
2495 2109
2007 2592
2225 1957
2108 2418
2464 2069
2161 2438
2317 2644
1930 2129
2063 2593
2647 2337
1973 2365
2508 2174
2590 2578
2087 2475
2646 2311
2179 2464
2114 2231
1934 2373
2419 2153
2480 2272
1917 2206
2374 2446
2059 2492
2308 2532
2300 2601
2199 2191
2619 2257
1577 2144
2043 2646
2415 2327
2029 2318
2188 2069
2469 2233
2254 1959
2123 2638
2317 2231
2390 1939
2185 2133
2103 2532
2108 1966
2131 2354
2409 2278
2309 2060
2492 2324
2135 1959
2546 2543
2086 2363
2404 2309
2606 2607
2292 2132
1918 2586
2144 2068
2218 2206
2331 2212
2196 2053
2416 2270
2154 2467
1966 2210
2607 2064
2117 2194
2433 2543
2623 2374
2039 2057
2478 1966
2315 2134
2589 2081
1945 2127
2551 1917
2588 2010
1935 2284
2240 2339
2495 2500
2319 2598
2400 2250
2414 2407
2323 2407
2313 2488
2567 2189
2400 2531
1946 2253
2139 2088
2413 2384
2451 2223
2526 2189
2377 2649
2209 2362
1577 2273
2552 2619
1918 2213
2468 2290
2233 2201
2309 2391
2447 2640
2331 2323
1941 2279
2193 2146
2103 2339
2284 1914
2363 2601
1938 2539
1938 1953
2115 2615
2102 2510
2385 2348
2005 2093
2047 2052
2308 2369
2602 2395
2045 2201
2376 2607
2131 1938
1983 2326
2646 2601
2123 2340
2520 2323
2624 2339
2465 1948
1993 2090
2038 2239
2228 2214
2012 2364
2111 2174
2131 2086
2475 2282
2460 2276
2495 2369
2474 2119
1926 2282
2391 2376
2271 2154
2083 2074
2344 2163
2613 2123
2471 2394
2526 2139
1960 2152
2574 2340
2275 2376
2475 2002
2157 2011
2172 2578
2395 1962
2495 2299
2068 2533
2491 1945
1984 2059
2553 2348
2532 1918
2103 2334
2276 2220
2331 2395
2233 2468
2104 2520
2174 2117
2582 2372
2520 2334
2381 2331
2575 2607
2145 2656
2520 2188
2620 1921
2226 2598
2169 2471
2045 2184
2218 2554
2060 2278
2638 2386
2058 2218
2180 2304
2164 2561
2372 2052
2602 2601
2546 2037
2307 2331
2328 2458
2268 2144
2339 1943
2132 2068
2068 2149
1964 2145
2279 2417
2153 2196
2638 2551
2273 1926
2498 2328
2493 2419
2246 2617
2266 2482
2150 2063
1941 2047
2037 2586
2268 1972
1997 2564
2399 2032
2600 2206
1962 2539
1959 2235
2525 2318
2266 2210
2409 2356
2546 2467
2071 2547
2389 1935
2200 2179
2128 2328
2171 2268
2333 2010
2475 2338
2030 2142
2509 2223
1984 1942
2184 1962
2074 2604
1945 2537
2020 2326
2149 2608
2229 2062
2007 2102
1970 2333
2164 1946
2308 2553
2150 2546
2069 2520
1966 2084
2233 2030
2336 2176
2495 2532
2440 2236
2039 136
2143 2511
2610 2036
2553 2307
2238 2105
2069 2428
2563 2309
2007 2434
1945 2608
2446 2539
2545 2515
2561 2121
2047 2398
2369 2495
2311 2040
2210 2526
2352 2430
1918 2190
1986 2395
1941 2607
2229 2408
2268 1987
1914 1919
2373 2656
1997 1938
2028 2328
2275 2063
1983 2484
2549 2122
1971 2340
2589 2384
1953 2121
2363 2240
2325 2366
2149 2153
1986 2418
2043 1971
2467 2586
2507 2602
2328 2155
1929 2625
2241 2336
2200 2253
2644 2497
2594 2589
2359 2446
2448 2120
2165 2037
1994 1945
2005 2216
2002 2246
2520 2326
2451 2180
2149 2328
2090 2500
2266 2602
2309 2189
2108 2271
2215 2183
2010 2250
2146 2371
2460 2244
2116 2171
1942 2478
2649 136
2045 2290
2074 2630
2625 2037
2410 1943
2611 2115
2229 2521
2257 1989
2299 2172
2511 2042
2112 2206
2118 2551
2225 2025
2060 2369
2446 2578
2191 2138
2222 2377
2429 2339
2028 2533
1983 2090
2032 2491
1998 2660
2378 1991
2102 2153
2460 2090
2154 1962
2244 2552
2615 2578
2059 2623
2111 2148
2518 2183
2500 2216
2327 2649
2526 2078
2600 2539
2044 2142
1577 2475
2246 2588
2068 2302
2409 1971
2211 2038
2103 2478
2120 1960
2296 2345
2449 2142
2511 2169
2354 2339
2087 2002
2356 1962
2607 2210
2451 2589
2326 2521
1953 2573
2328 2491
2578 2543
2081 2252
2533 2510
2078 2136
2550 2559
2294 2510
2188 2093
2567 2180
2056 2045
2410 2476
2313 2422
2385 2384
2521 2526
2278 2485
2093 2233
2608 2509
2352 1966
2339 2410
1925 2410
2532 2290
1980 2538
1577 1945
2078 2200
2464 2021
2431 2528
1993 2179
2302 2436
2336 2102
2288 2300
2409 2123
2241 1916
2179 2602
2461 2336
2646 2348
2280 2283
2395 2410
2467 2104
2222 1981
2090 2056
2010 2203
2453 2291
2278 2655
2559 2329
2164 1962
2655 2299
2307 2604
2123 2172
2199 2399
2122 2404
2198 2169
2009 2004
2475 1916
2600 2083
2188 2124
1946 2299
2332 2235
1975 2236
2347 2121
2352 2340
2598 2127
2078 2433
2264 2588
2121 2275
2140 2033
2334 2266
2191 2336
2354 2600
2060 1966
2160 1922
2365 2006
2123 2655
1968 1957
2184 2363
2070 2156
1993 2118
1962 2216
2056 2229
2331 2060
1938 2063
2600 2266
2502 2298
2324 2381
1985 2564
2598 2629
1948 2598
2410 2404
1938 2150
2250 2153
2068 2028
2053 2101
2492 1917
2605 2125
2544 2143
2459 2157
2186 2232
2144 1718
2376 2303
2343 2283
2292 2544
2180 2368
2551 2482
2363 2244
2630 1983
2069 2353
2097 1998
2078 2590
2108 2593
1993 1938
2111 2047
2174 2510
2598 2379
2283 2537
2068 2280
1986 2339
2407 2045
2369 2392
2190 2492
2428 2418
2338 1948
2109 2543
2292 2149
2630 2069
2111 2643
2655 2430
2240 2271
2601 2478
2649 2203
2072 1718
2239 2509
2303 2142
2111 2294
2633 2116
2553 2139
2202 2627
2567 2598
2154 2172
2542 2348
2225 2116
2290 2578
2124 2218
2215 2199
1944 2038
2607 2539
2011 2585
1988 2490
2408 2625
2258 2040
2056 2654
2637 2145
2509 2149
2030 2266
2289 2232
2381 2363
2294 2434
1966 2410
1918 2564
2476 2309
2445 2589
2531 1913
2578 2095
2261 2369
2190 1984
2574 2499
2306 2112
2201 2615
2142 1946
2635 2232
2233 1966
2478 2430
2078 2352
2589 2087
2582 2463
2611 2356
2586 1993
2300 2179
2101 2003
2031 2133
2092 2391
2491 1940
2409 2121
2097 2538
2215 2081
2084 2046
2180 2461
2093 2430
2081 2246
2615 2591
2374 2139
1958 2659
2199 2537
2200 2462
2475 2187
2307 2630
2445 2039
2652 2415
2602 2200
2081 2471
2122 2546
2549 2020
2538 1991
2154 2037
2275 2414
2506 2521
2642 2232
2391 2303
2074 2220
2542 2142
2403 1978
2108 2077
1917 2046
1993 2460
2655 2410
2171 2097
2395 2329
2213 2098
2148 2293
2617 2511
1940 2042
2404 2278
2240 2210
2093 2646
2109 2108
2497 2314
2292 2144
2658 2657
2332 2283
2054 2567
2189 2303
2027 2018
1927 2006
1998 2018
1940 2649
2567 2267
2283 2293
2376 2381
2309 2005
2134 2268
1465 1941
1718 2319
1976 2659
2203 2463
2516 1948
2169 2125
2258 2428
2063 2638
2451 2328
2352 2504
2081 2101
2222 2003
2047 1926
2336 2039
2257 2500
2553 2363
1943 2507
2337 2157
2619 2300
2630 2043
2156 2455
2090 2576
2649 2125
2282 2372
2007 2117
1992 1988
1959 2420
1938 2244
2468 2533
2489 2334
2192 1927
2078 1989
2036 2031
1465 2368
2115 2124
2326 2037
2639 2640
2601 2600
2603 2161
2220 2271
2148 1577
2387 2611
2299 1918
2353 2045
2538 2297
2118 2600
2384 2315
2420 2338
2514 2214
2384 2194
2169 2642
2433 2124
2638 2482
2392 2574
2253 2606
1979 2084
2607 2237
2607 2404
2095 2074
2617 1920
2543 2064
2531 2384
2573 2611
2235 1926
2012 1999
2530 2065
2643 2194
2366 2612
2458 2537
1995 2640
2491 2336
1941 2395
2069 2602
1927 1951
2436 2254
2574 2552
2322 2656
2016 2447
2579 2348
2331 2150
2313 2375
2363 2638
2088 1917
2428 2007
1936 2047
2627 2620
2094 2167
2045 2551
2032 1959
2526 2615
2550 2560
2059 2030
2046 2020
2646 2154
1931 2006
2625 2370
2363 2467
2475 2273
2179 2347
2629 2643
2104 2507
2649 2458
1926 2296
2108 2359
2615 2602
2060 2121
2434 2180
2084 2615
2427 1971
2189 2394
2615 2404
2336 2135
2309 2624
2150 2131
2593 2575
2271 2615
1945 2589
1718 2028
2201 2376
2124 2118
2546 2299
2560 2574
2323 2005
2341 2236
2327 1465
2428 2654
2333 2567
2649 2151
2165 2504
2502 1920
2122 2037
2340 2086
1940 2598
1994 2598
1918 2331
2601 2275
2072 2458
2553 2323
1993 2213
2640 2024
2597 2047
2333 2319
2640 2538
2194 2002
2026 2247
2506 2460
2578 2482
2021 1993
2538 2202
2213 2561
2133 2509
2030 2033
2326 2638
2592 1981
1914 1951
2504 2352
2390 2396
2123 2276
1917 2339
2532 2078
2103 2492
2586 2104
2174 2398
2072 2132
1985 2095
2127 1941
2434 2087
2607 2103
2267 2394
2534 1936
2159 1921
2259 2537
2574 2142
2468 2550
2586 2229
2471 1959
2393 2084
2261 2600
2309 2578
2077 2216
2601 2423
1914 2645
2254 2047
2322 2128
2429 1993
2028 2336
2005 2086
2363 2308
2257 2624
2615 2088
2111 1947
2192 2011
2351 2191
2602 2407
2026 2250
2499 2353
2560 2359
2007 1926
2156 1975
2098 2460
2174 2247
2229 2564
2087 1932
2033 2619
2287 2331
2062 2458
2389 2400
2159 2583
2139 2240
2028 2293
2559 2482
2394 2161
2257 2164
2282 2153
2365 2538
2560 2601
2452 1970
2001 2225
1964 2310
2138 2609
2030 2550
2555 2304
2603 2283
2279 2372
2404 2564
1961 2535
2153 2496
2533 2199
2549 2604
2352 1925
2233 2615
2624 2073
2187 2039
2418 2218
2072 2451
2279 2445
2404 2275
2253 1971
2630 2590
2327 2396
2554 2240
2088 2549
2164 2423
2072 2169
1931 2202
2381 1984
2147 2545
2261 2118
2285 2543
2288 2391
2600 2646
2654 2339
2428 2504
2376 2201
2408 2276
2103 2550
2128 2338
2157 1991
2354 2300
2418 2607
2233 2048
2302 1959
2128 2250
2233 1993
2289 2081
2607 2499
2326 2307
1945 2176
2283 2102
2189 2616
2087 2249
2315 2144
2471 2589
2649 1954
1939 2394
2356 2326
1971 2404
2326 2188
2172 2218
2307 2482
2416 2205
2553 2108
2059 2122
2133 1964
2253 2334
2117 1948
2425 2298
2543 1718
1945 2379
2507 2122
2282 2183
2390 2243
2557 1964
1948 2163
2102 136
1951 2447
2511 2057
2327 2268
2206 2073
1916 1577
1980 2297
2125 2279
2573 2257
2482 2324
2174 1955
2389 2250
2271 2543
2022 2284
2271 2573
2108 2266
2040 2074
2555 2398
2039 2463
2381 2359
2410 2150
2161 2652
2201 2043
2109 2131
2165 2266
2364 2435
2574 2278
2221 2132
1962 2253
2339 1953
2266 1918
2326 2574
2403 2497
2510 2589
2073 2131
2283 1926
2053 2135
2117 2567
1938 2409
2404 2055
2038 2589
2509 1920
2108 2276
2138 2250
2520 2308
2559 2428
1930 2286
2296 2473
1946 2464
2485 2553
2630 2462
2410 1925
2142 2339
2631 2088
2169 2434
2604 1979
2224 2042
2504 2216
2213 2404
2068 2394
2648 2660
1979 2356
2145 1926
2093 2164
2240 2307
2240 2190
2602 2579
2391 2536
2328 2142
2139 2604
2499 2055
2328 2042
2117 1941
2224 2052
2347 2485
2132 2187
2064 2482
2577 2120
1577 2519
2478 2551
2099 1976
2482 2469
2244 2037
2560 2139
2131 2655
2500 2109
2266 1989
2021 1979
2495 2654
2351 2176
2532 1984
2073 2253
2383 2216
2410 1941
2266 2278
2381 1985
2638 2561
2319 2224
2216 2526
2354 2046
2428 2376
2495 2395
1939 2068
2020 1984
2047 2153
2026 2150
2416 2211
2653 2436
2501 2132
2612 2174
2585 2538
2550 2395
2381 2469
1981 2344
2371 2361
2237 2492
2211 2117
2499 2123
2374 2005
2033 2278
2229 2093
2206 2218
2140 2467
2007 2555
2108 1997
1998 2378
2609 2028
2334 2306
2501 2432
2351 2028
2095 2410
2073 1943
2206 2469
2492 2348
2233 2140
2454 2044
2292 2597
2588 2582
2572 2149
2140 2381
2376 2363
1927 2585
2112 2033
2550 2593
2103 2326
2386 2244
1938 2165
1982 2560
2142 2299
2409 2172
2626 1957
2469 2220
2047 2581
2339 2579
2521 2201
2326 2467
2339 2308
2370 2655
2150 2575
2464 2172
2414 2539
2370 2212
2616 2010
2542 2464
2306 2123
2201 2088
2148 2125
2239 2436
2229 2055
2143 2648
2542 2630
2404 1993
2340 2478
1962 2084
2283 1941
2073 2524
2005 2150
2459 2447
2611 2109
2384 2134
2354 1918
2564 2374
2353 2073
2607 2500
2615 2271
2574 2323
2419 2125
2489 2607
1979 2369
2642 2336
2450 2548
2551 1943
2492 2468
2349 2515
2073 2504
2624 2423
2351 2189
1955 2510
2046 2551
1941 2334
136 2336
2410 2309
2261 2356
2586 2212
2270 2141
2247 2463
1984 2521
2176 2246
2607 2244
2601 2140
2224 2332
2122 2098
1995 2018
2425 2209
2577 2126
2246 2010
1947 2518
2309 2499
2128 2132
2598 2087
2376 1979
2337 1998
2309 2593
2117 2533
2507 2220
1918 2275
1718 2198
2423 2631
2282 2512
2341 2659
2543 2123
1986 2482
2429 1971
2161 2232
2433 2492
2341 2085
2543 2030
2033 2154
1932 2039
2334 2218
2223 2643
2108 2078
1962 2606
2593 1986
2139 2276
2133 2508
2607 2593
2504 2118
2401 2594
2628 2035
1984 2409
2488 2397
2344 2155
2104 2266
2273 2151
2095 2593
2494 2639
2617 2436
2180 2264
2243 1959
2344 2161
2573 2553
2138 2649
2073 2086
2472 2194
2032 2224
2315 2351
2010 1718
2045 1971
2629 2127
2037 2244
2010 2039
2420 2071
2103 2477
2176 2247
2098 2624
2172 2407
2103 2551
2271 1983
2419 2038
2047 1465
1947 2087
1922 2156
2304 2518
2408 1917
2035 2614
2339 2560
2611 2546
2271 2037
2384 2283
2543 2398
2306 2507
2502 136
2184 2414
2232 2117
2229 2074
2081 2319
2501 2542
2063 2370
2125 2458
2285 2508
2007 2067
2399 2598
2660 2657
2347 2073
2299 2124
2144 2599
2283 2304
2553 2172
2037 1985
2083 2654
1917 2084
2295 1948
1939 2180
2597 2543
2617 1948
2317 2049
2299 2499
1941 2103
2423 2552
2339 2606
2485 2037
2521 2625
2117 2347
2297 2627
136 2128
1993 2098
1966 2414
2282 2285
2212 2429
2092 1942
1979 2218
2468 2446
1994 2148
2434 2081
2611 2095
2348 1966
2643 2519
2543 2510
2131 2601
2331 2287
2521 2532
2503 2248
2477 2329
1989 2059
1946 2477
1986 2348
2054 2368
2619 2329
2608 2283
2295 2187
2638 2266
1935 2192
2611 2429
1974 2368
2476 2229
2247 2461
2116 2012
2040 2410
1929 2329
2489 2339
1984 2590
2087 2054
2398 2582
2549 1985
2292 2333
2585 2024
2308 2625
2348 2040
1972 2337
2255 2320
2426 2076
2060 2088
2352 2553
2460 2098
2399 2471
2526 2593
2561 2115
2121 2560
2555 2087
2184 2410
2174 2194
2629 2385
2045 2500
2322 2231
2563 2150
2491 2250
2631 1979
2648 2659
2266 2468
2244 1943
2415 2101
2241 2451
2551 2477
2206 2210
1981 2221
2326 2381
2334 2104
1947 2198
2317 2361
2181 2120
1971 2542
2398 2247
2464 1971
2526 2386
2352 1993
2591 2139
1985 2206
2582 2196
2478 2019
2220 2601
2283 2198
2573 2468
2340 2083
2521 2307
2386 2563
2607 2586
1993 2045
2212 2460
2056 2118
2613 2560
2334 1985
2187 1577
2118 2056
2299 2244
1976 2018
1928 2417
2386 2213
1919 2143
1577 2398
2647 2001
2140 2485
1984 2073
2154 1985
2206 2374
2604 1966
2561 2428
2067 2526
2213 2237
2055 2604
2544 2278
2030 2507
2325 2194
2299 2045
2556 2290
2311 2354
2266 2654
2429 2409
2043 2549
2121 1983
1959 2572
2142 2340
2630 2103
2133 1959
2282 1941
1985 1984
2351 2183
2583 2024
2142 2462
2511 2533
2206 2433
1577 2332
2549 2574
1985 2504
2073 2374
2093 1929
2216 2370
2372 2292
2026 2351
2433 2229
2071 2148
2304 2396
2032 1955
2339 2418
2376 2045
2059 2359
2419 2198
2189 2250
1985 1966
2376 1938
2294 2267
2468 2118
2590 2655
2329 2212
2625 2391
2001 1931
2290 2468
2629 2616
2283 2224
2643 2543
2218 2118
2174 2475
1971 2324
2047 1990
2282 2368
2340 2165
1959 2054
2103 2539
2112 1925
2576 2600
2616 2419
2292 2054
2374 2216
2164 2136
2434 2390
1938 2646
2030 2407
2226 2142
2654 2586
2235 1947
2131 2142
2404 2093
2625 2220
2033 2586
2575 2542
2347 2068
2202 1954
2558 2614
2508 2081
2005 2374
1993 2549
2308 2624
2395 2190
2307 2363
2174 2588
2095 2526
2038 2125
2333 2465
1920 2153
2223 2417
2188 2573
2338 2007
1938 2560
2499 1946
2282 1948
2586 2290
2275 2381
2391 2093
2083 2095
1939 2501
2343 2289
2579 2108
2176 2151
1995 2447
2312 2127
2117 2384
1954 2649
2098 1993
2657 1931
2271 2550
2602 2095
2386 2154
1962 2593
2516 2203
1977 2265
2413 2203
1941 2104
2492 1966
2464 2300
2309 2526
2077 2121
2151 2002
2520 2542
2504 2559
2289 2007
2553 2607
2484 2433
2176 1916
2010 2343
1941 2026
2586 2552
2323 2229
2030 2615
2394 2127
2229 2551
2198 2368
2354 2184
2646 2103
2507 2040
2064 1984
2507 2005
2302 2372
2423 2043
2290 2638
2619 2131
2552 2244
1985 2137
2271 2240
1963 2088
2411 2277
2639 2633
2033 2600
2161 2479
2276 2590
1993 2430
2171 2645
2102 1959
2142 1971
2052 2081
2077 2561
2283 2155
2124 1943
1965 2557
2370 2299
2612 2366
2423 2299
2567 1926
2128 2310
2059 2290
2253 2311
2642 2588
2354 2623
2629 2241
2326 2287
2397 2228
1971 2030
2223 2042
2279 2153
2139 2407
2329 1953
2256 2265
2310 2155
2430 2340
2302 2128
2295 2125
1975 2411
2578 2037
2278 2423
2585 2284
2154 2237
1994 2047
2078 2506
2010 2196
2619 2271
2347 2602
2432 2132
2212 1925
2447 1921
1932 2475
2600 2124
1938 2495
2608 1941
2638 2115
2109 2395
2514 2031
2549 2271
2631 2499
2187 2458
2428 2407
2047 1930
2620 2658
2621 2313
2073 2521
2221 2603
2198 2461
2284 2024
2324 2302
1991 2647
2232 2417
2289 2608
136 1998
2458 2510
2254 2511
2024 2027
2054 2642
2229 1966
2159 1998
2586 2429
2397 2047
2410 2140
2016 2004
2542 1983
2526 2142
2208 2057
2287 1993
2398 2134
2104 2410
2325 2149
2247 2169
2435 2647
2271 2423
2121 2408
2536 2172
2653 1577
2064 1943
2449 2478
2328 2475
2215 2543
2384 2616
2139 2331
2307 2184
2229 2275
2359 2414
2606 2414
1926 2087
2657 1991
2165 2164
2506 2229
2348 1986
2473 2145
2282 2294
2075 2451
2191 2053
2630 2539
2110 2222
2148 2047
1718 2224
2030 2124
2139 2064
2629 2062
1955 2283
1941 2302
2434 2332
2379 2264
2608 2508
2567 2065
2410 1986
2165 1971
2445 2289
2464 2261
2381 2059
2607 2615
2587 2160
2192 2006
2250 2241
2536 2229
2347 2224
2139 2077
2484 1983
2469 2611
2037 2550
1947 2642
2359 2615
1990 1975
2556 2593
2520 2591
2254 2598
2081 2603
2241 2199
2430 2564
2002 1916
1986 2615
1980 2365
2428 2121
2020 2339
2030 2573
2343 2087
2200 2602
2224 2133
2271 2121
2251 2160
2395 2495
2111 2319
2331 2468
2216 2220
2005 2329
2072 2518
2374 2290
1946 2492
2638 2619
1718 2007
2334 2564
2206 1943
2043 2077
2057 1987
1944 2362
2135 2417
2356 2043
2587 2317
2333 1955
2203 2384
2133 2127
2607 2339
2150 2600
2575 2551
2047 2032
1980 2116
1995 1935
2609 2138
2190 2348
2418 2063
2184 2542
1985 2021
2120 2034
2368 2597
2299 2404
2095 2339
2543 2410
2006 2378
2356 2240
2549 2446
2395 2430
2370 1966
2101 2283
2631 2331
2250 2531
2516 2555
2468 2137
2078 2478
2408 2046
2390 1959
2425 2038
2201 2165
2386 2253
2603 1970
2130 2160
2268 2530
2138 2451
2309 1917
1918 2506
2068 1940
2095 2467
2653 2282
2567 2068
2071 2183
2090 2504
2347 2273
2329 2121
2304 2501
2368 1577
2467 2275
2404 2542
2266 2243
2131 2074
1465 2111
2110 2235
2307 2093
2338 2372
2394 2259
2542 2374
2271 2055
2308 2560
2084 2356
2365 2647
2077 2200
2073 2395
2054 2135
2282 2313
2367 2214
2589 2394
2374 2220
2218 2646
2657 2025
2084 2500
2602 2276
2138 2057
2624 2506
2172 2484
2306 1993
2161 2194
1465 2292
2023 2366
2039 2151
1926 2232
2423 2574
2606 2395
2305 2068
2359 2200
2515 2320
2205 2047
2507 2575
2322 2406
2395 2376
2072 2396
2619 1993
2147 2188
2602 2611
2601 2309
2254 2031
2005 2123
2429 2646
2441 2422
2564 2575
2221 2432
2348 2278
2314 2047
2235 2328
2060 2500
2620 2143
2364 1914
2354 2492
2550 1985
2463 2143
2384 1940
2612 2322
2161 2384
2044 2520
2222 2226
1943 2233
2122 2172
2637 2289
1932 2332
2462 2220
2283 2223
2155 2273
1963 2059
2282 2475
2638 2423
2166 2335
2489 2354
2553 2069
2290 2122
1932 1947
2122 2131
2536 2184
2469 2619
2550 1989
2101 2134
2482 2037
2200 2108
2509 2081
2172 2046
2053 2511
2139 2543
2223 2163
2550 2347
2074 2504
2606 1962
2504 2229
2654 2261
2521 2418
2020 2142
2319 2174
2220 2638
2484 2560
2040 2395
2220 2324
2302 2187
2054 1577
2369 1997
2086 2395
2512 2471
2648 2447
2244 2500
2509 2649
2549 2469
2276 2347
1984 2624
2180 2472
2220 2150
2324 2095
2068 2471
1993 2278
2632 2614
2369 1938
1974 1964
2592 2143
2331 2266
2213 1983
2045 2460
2090 2043
2058 2019
2233 2484
2561 1925
2374 2112
2133 2514
2398 2385
2354 2374
2101 2117
2384 2332
2063 2410
2241 2328
2583 2346
2526 2253
1954 2196
2318 2211
2240 2299
2002 2516
2381 2086
2133 2196
2389 2413
2127 2302
2543 2078
2502 1940
2615 2484
1916 2241
2075 2377
2308 2467
2212 2559
1979 2492
2332 2572
2111 2603
2400 2610
1920 1945
1951 1980
2279 1926
2087 2445
2602 1986
2233 2350
2468 2339
2235 2062
2356 2059
2561 2124
2615 2040
2194 2111
2597 2283
2330 2268
2267 2137
2302 2293
2468 2600
1925 2150
2139 2323
2134 2101
2209 1926
2642 1465
2183 2047
2040 2078
2088 2359
2598 2463
2433 2244
2329 1943
2553 2352
1968 1976
2495 2020
2109 2433
2607 2561
1981 2336
2619 1925
2261 2090
2172 1946
2137 1941
2238 2260
2630 2244
2384 1985
2331 2460
2583 2459
1978 2248
2040 2210
2137 2279
2058 2154
1940 2250
2153 2054
2601 2520
2486 1988
2434 1959
2370 2489
2318 2557
2188 2359
2354 2218
2624 2625
2111 2547
2516 2512
2280 2161
2608 2372
2289 2330
2489 2131
2290 2553
2257 2213
1986 2477
2477 2593
2187 2254
2311 2147
2659 2260
2479 1947
1985 2319
2553 2631
2345 2226
2590 2109
2150 2216
1999 1980
2140 2573
2608 2649
2499 1917
1962 2095
2223 2232
2598 2072
2340 2261
2340 2109
2324 1984
2240 1941
2553 2040
2290 2356
2128 2287
2532 2507
2460 1963
2649 2010
2410 2234
2387 2460
2655 2591
2053 2054
2229 2532
2344 2199
2468 2026
2083 2467
1923 2310
2222 2132
2404 2045
2356 2625
2559 2045
2054 2134
2290 2172
1577 2239
2119 2488
2027 1998
2279 2592
2492 2410
2190 2521
2176 2610
1993 2287
1947 2547
2514 1964
1945 2111
2307 1983
2085 1926
1946 2433
2408 2275
2307 2308
2518 2471
2276 2638
2328 2068
2198 1577
2012 2116
1916 2498
2201 2563
1964 2091
2468 2084
2206 2550
2032 2268
2228 1960
2338 2629
1944 2610
2078 2086
2555 1954
2029 2272
2613 2131
1943 2655
2564 1941
2574 2261
2090 2140
2594 2133
2430 2122
2593 2482
2251 2173
2030 1925
2126 2361
2115 2418
2327 2398
1989 2276
2633 2202
2572 2385
2646 2607
1995 2417
2002 2434
2153 2475
2068 2434
2468 2484
2148 2398
2224 2241
2097 2626
2583 2159
1929 2485
2121 1979
2553 1963
2169 2143
2138 2508
2377 2285
2139 2326
1993 2489
1955 2026
2085 2406
2179 2604
2419 2054
2486 2320
2555 2333
2188 2118
2103 2356
2617 2038
2087 2292
2469 2468
2038 2174
2244 2429
2472 1972
2059 2308
2068 2101
2401 2349
2542 2506
2252 2333
1985 2615
2484 2275
2043 2374
2420 2072
2304 2434
1933 2488
2268 1945
2516 2247
2101 2223
2234 2526
2081 2336
2184 1971
1941 2347
2585 2645
2328 2224
2046 2104
2416 2226
2338 1945
2478 2414
2589 2330
2611 2553
2184 2500
1984 2638
2465 2351
2125 2616
2593 2233
2335 2403
2482 2573
2509 2328
2430 2095
2387 2019
2054 2133
2492 2326
2579 2542
1928 1973
1932 2071
2348 2309
1946 2575
2521 2348
2359 2331
2607 2216
2551 2478
2655 2339
2086 2575
2381 2520
2340 2500
2408 2188
2526 2449
2063 2550
2101 2571
2046 2060
2081 1955
1984 2433
2273 2132
2469 2604
2347 2530
2200 2590
2223 2215
2283 2267
2657 2585
2348 2073
2042 2533
2165 2257
2233 2404
2266 2059
2466 2650
2525 2362
2556 2253
2575 2078
2449 2189
2283 2436
2546 2139
2586 2353
2032 2537
2331 2142
2109 2142
2141 2038
2165 2591
2309 2188
2183 1948
2301 2245
2132 2264
2136 2200
2608 2597
2446 2601
2018 2538
2602 1989
2647 1914
2578 2253
2428 2278
2465 2598
2372 2054
2241 2087
2642 2289
2128 2463
2111 2176
2376 2240
2042 2436
2642 2242
2600 2261
2586 2484
2386 2212
2643 2347
2098 2631
2172 2464
2409 2579
2604 2172
2241 2343
2004 2337
1946 2506
2127 2151
2549 2532
2201 2139
2387 2352
1979 2550
2472 2143
2590 2257
2054 2028
2347 2579
1943 1929
2125 2047
2451 2101
2309 2563
2034 2321
1963 2020
2273 2169
1928 1927
2655 1966
2247 2333
2423 2300
2107 2411
1980 1914
2430 2395
2409 2103
2336 2510
1993 2468
2059 2340
2471 2642
2037 2060
2072 2096
1997 2190
2098 2625
2071 2117
1947 1970
2474 2317
2027 1928
2626 2202
2395 2077
2638 2409
1919 2627
2140 2526
1984 2278
2030 2359
2020 2560
2294 2224
2127 2567
2554 2206
2338 2377
2543 2374
2140 2423
2329 2563
2092 2019
2278 2266
2550 2218
2142 2266
2292 2491
2142 2655
2526 2543
2582 2250
2309 1946
2383 2478
2063 2326
2212 2623
2371 2129
2241 1926
2229 2501
1465 2223
2577 2412
2203 2533
2384 2555
2551 2190
2414 2056
2610 2322
2183 2273
2598 2436
2184 2374
2408 2590
2165 2244
1917 2059
2174 1945
1978 1990
2266 2443
2067 2387
2331 2218
2631 2464
2520 2625
2098 2244
2605 2002
2148 1945
2590 2428
2172 2446
2590 2418
2022 2538
1979 2462
2324 2563
2253 2064
2559 2078
1966 2299
2045 2040
2032 2319
2645 2116
2273 2463
1982 2092
2543 2324
1993 2591
2317 2456
2161 2649
2620 2004
2174 2608
2118 2334
2222 2415
2264 2243
2625 2611
2507 2408
1916 2003
2414 2108
2266 2109
2647 2636
2138 2472
2590 1966
2189 2047
1973 2097
2467 2363
2411 2158
2247 2641
2336 2398
2278 2646
2111 2068
2289 1959
2266 2408
1993 2086
2556 2261
2433 2060
2063 2564
2142 2623
136 2264
2064 2104
2521 2468
2543 1997
2328 2319
2654 2244
2278 1993
2138 2232
2423 1953
2183 1916
2463 2347
2300 2478
2630 2404
2344 2594
1986 2060
2131 2484
1998 2620
2573 2520
2454 2084
2218 2549
2096 2603
2484 2326
2165 2542
2237 2200
2087 2247
2654 2266
2573 2326
2372 1577
2472 1954
2124 2579
2118 2539
2326 2624
1941 2563
2255 2453
2364 2365
2363 2553
2235 2451
2224 2509
2169 2151
2324 2552
2064 2352
2260 2160
2615 2563
2103 2045
1983 2303
1946 2353
2129 2342
2187 2332
2627 2658
2088 1986
1986 2492
2430 2553
2294 2537
2539 2103
2071 2264
2133 2071
2459 2268
2208 1941
2003 1970
2334 2573
2563 2276
2479 2003
2240 2593
2592 2149
2318 2480
1945 2072
1926 2241
2338 2597
2240 2423
2469 2244
2374 2118
2615 1985
2127 2254
2384 2336
1962 2646
2004 2435
2647 2494
2410 2492
2200 2045
2471 2038
2536 2464
2054 136
2395 2356
2308 2299
1954 2068
2184 2460
2279 2174
2085 2107
2009 1914
2140 2623
2370 2376
2139 2311
2579 2073
2546 2359
2179 2063
1946 2131
2276 2414
2344 2432
2038 2203
2273 2289
2582 2241
2458 2592
2221 2333
2512 2629
2447 2636
2325 2555
2416 1952
2216 2607
1993 2631
2588 1954
2242 2163
2348 2559
2414 2086
2342 1964
2492 2266
2093 2063
2542 2188
2116 2018
2124 2468
2655 2216
2081 2588
2495 2607
2521 2499
2139 2630
1993 2539
2370 2369
2102 1940
2199 2343
2111 2250
2250 2010
1945 2597
2279 2189
2233 2005
2018 2657
2336 2280
2233 2026
2126 2181
1993 2206
2242 2289
2446 2334
2468 2046
2418 2593
2369 2060
2512 2520
2132 2555
2110 2479
2507 2045
2151 2347
2348 2602
2068 2319
2593 2122
2232 2333
2084 2579
2607 2395
2229 2253
2231 1960
2068 2138
2636 2583
2347 2469
1984 2334
2011 2009
2196 2420
2367 2608
2384 2533
1920 1932
2643 2247
2001 2012
2157 2004
2491 2510
2086 2090
1984 2064
2482 2356
1981 2072
2194 2279
2344 2588
2155 2610
2463 2436
2549 1918
2282 2292
2081 2149
2077 2460
2046 2271
2309 2077
2356 2559
2489 2324
1973 2268
2128 1972
2275 2112
2326 2600
2043 1993
2583 2364
2370 2611
2472 2279
2253 2573
2321 2041
2040 2115
2225 1998
2469 2607
2458 2026
2606 2045
2122 2240
1973 2337
2611 2154
2576 2476
2149 2463
2559 2131
2620 2583
2209 2205
2463 2629
2218 2104
2279 2368
1948 2347
2410 2084
2340 2060
2334 2469
2575 2258
2118 2386
2354 2359
1960 2440
2624 2033
2062 2333
2485 1962
2064 2261
2218 2122
2480 2031
2512 2637
2567 2087
2040 2501
2504 2549
2563 2521
2500 1962
2485 1997
2211 2289
2087 2223
1946 1938
2654 2037
2294 1954
1960 2105
2030 2395
2338 2153
2529 2531
2123 2579
2024 2447
2366 2608
2278 2128
2309 2288
2467 2492
2336 2151
2347 1940
2616 2102
2464 2521
2459 2022
2646 2142
2149 2247
2629 2153
2409 2206
2122 2059
2068 2249
2016 2657
2132 2336
2071 2398
2657 2006
2432 1939
2235 2085
2325 2406
2118 2564
2591 2433
2199 2598
2331 2484
2468 2086
2108 2020
2464 1943
2629 2247
2630 1997
2519 2250
2090 2433
2395 2560
2043 2220
2386 2549
2104 2136
2123 2381
2206 2604
2307 2560
2164 2233
2629 2199
2273 2377
2324 2077
2567 2293
2302 1577
2286 2411
2045 2084
2027 2171
2642 2141
2097 1972
2194 1941
2307 2561
2344 1987
2088 2308
2434 2247
2233 2311
2109 2551
1940 2475
2111 2555
1940 2010
2586 2546
2324 2323
1985 1938
2604 2347
2043 2046
2283 2189
2054 2003
1946 2244
2271 2575
2430 2386
2369 2536
2630 2098
2611 2369
2372 2223
2104 2112
1979 2090
2267 2283
2333 1939
2063 2507
2417 2007
2290 2615
2522 2510
2229 2045
2502 2198
2520 2218
2030 2339
2604 2300
2226 2110
1964 2035
2603 1939
2511 2458
2233 2340
2225 2660
2559 2604
2186 2145
1941 2088
1988 2650
2165 2347
2593 1918
2386 2546
2539 2507
2078 2137
2434 2509
2559 2258
2623 2600
2520 2083
2040 2340
2154 2086
2407 2559
2093 2086
1962 1979
2504 2386
2188 1929
2240 2395
2515 2490
2122 2495
2290 2495
1932 2149
1953 2423
2352 1979
2484 2084
2604 1984
2039 2183
2588 2509
2564 2339
2404 1962
2149 2336
1946 2418
2351 2007
2054 2616
2132 2512
2055 2040
2074 2266
2188 2059
2154 2500
2300 2060
2630 1993
2416 2325
2629 2496
2133 2336
1979 1917
2333 2274
1962 2423
2088 2118
2063 2407
2547 2473
2328 2254
2571 2194
2022 2050
2353 2323
2078 2165
2640 1999
2122 2136
1945 2052
2369 2184
2655 2306
2615 2408
2073 2098
2010 2347
2342 2091
2639 1951
2186 2038
2042 2338
2223 2617
2053 2180
2507 2376
2058 2573
2124 2504
2184 2521
2323 2506
2649 2338
2131 2542
2171 2346
2601 2021
1944 2047
2115 2309
2559 2118
2063 2423
2141 2318
2047 2176
2259 2543
1962 2074
2408 2308
2333 2215
2292 2598
2206 2559
2353 2122
2453 2255
2254 2491
2396 2510
2187 2148
2078 2638
1941 1918
2218 2550
2007 1465
2179 2078
2019 2058
2176 1577
1959 2183
1968 2640
2190 2586
2550 2521
2510 2653
2607 2381
2391 2033
2576 2630
1938 2033
2290 2086
2093 2123
2037 2098
2093 2495
2161 2396
2433 2625
2318 2270
2077 2370
2358 2411
2464 2593
2501 2394
2266 2624
2560 2083
136 1972
1577 2468
2326 2556
2354 2063
2111 2471
2537 2345
2246 2641
2218 2611
2381 2604
2578 2408
2268 2508
2081 1959
2557 2031
1577 2533
2351 2032
2143 2128
2183 2537
2077 2045
2118 2374
2030 2200
2377 2617
2323 2164
2564 2484
2171 2018
2578 2109
2560 2532
2281 2301
2218 2276
2068 2333
2215 2153
2323 2118
2363 2005
2392 2500
2121 2172
2176 2471
2151 2241
2347 2279
2619 2556
1985 2348
2494 2284
2069 2206
1971 2408
2090 2354
2348 2290
2042 2057
2332 2508
2103 1943
2042 2292
2084 2606
2510 2264
2468 1917
2631 2593
2092 2288
2458 2052
2099 1941
2115 2477
1918 2619
2564 2290
2464 2275
2504 2093
1993 2043
2560 2624
2629 2592
2456 2382
2220 2115
2187 2512
2348 2090
2083 2601
2624 2095
2469 2253
2206 2409
1938 2131
1985 2387
1999 2009
2045 2464
2183 1577
2410 2536
1938 2098
2393 1985
2582 2028
1921 2061
2506 1985
2494 2011
2339 1929
2590 2624
2108 2579
2090 2464
1986 2037
2586 2188
2212 2229
1959 2062
2289 2039
2206 1985
1926 2280
2309 2353
2138 2463
2428 2258
2038 2649
1938 2093
2046 2190
2326 2200
2347 2072
2659 2405
2071 2267
2059 2469
2059 2369
2040 2293
2087 2224
2465 2420
2598 2068
2354 2037
2598 2567
1938 2179
2253 1938
2011 2648
2629 2071
2348 1943
2489 1953
2121 2104
2084 2088
2559 2069
2347 2136
2520 2206
2630 2064
2590 2244
2073 2212
2267 2007
2438 2294
2574 2395
2552 2574
1938 2347
2201 2278
1942 2526
2150 2428
2451 2533
2376 2164
1993 2040
2418 2404
2653 1932
2430 2121
2594 2367
2212 2630
2549 2083
2378 2583
2507 2253
2006 2024
2030 2433
2131 2139
2462 2208
2368 2117
2646 2638
2158 2228
1943 2485
2098 2575
2118 2077
2053 2501
2006 2620
1917 2623
2009 2116
2439 2217
2550 2112
2090 2139
2325 2294
2069 2030
1962 2121
1984 2276
2063 2573
2323 2575
2191 2068
1925 2655
2409 2468
2415 2432
2594 2038
1993 2492
2247 2068
2469 2369
2590 2043
1993 2078
2103 2112
2187 2475
2338 2180
2042 2372
2638 2253
2086 2638
1971 2154
2077 2564
2337 2027
2624 2037
2142 2578
1989 2299
2194 2161
2110 2384
2220 2201
2428 2093
2557 1965
2476 2430
2464 2299
2607 1979
2233 2060
2351 2117
2510 2099
2289 1955
2582 2629
2489 2601
2512 2128
2363 2409
2551 1984
1998 2159
2638 2655
1962 2573
2336 2419
2072 2280
2601 2084
2086 2063
2018 1927
2506 2020
2026 2543
2492 2611
2010 2133
2226 2419
2225 2157
2485 2040
2125 2501
2180 2111
2266 2069
1993 1963
2344 1954
1958 2365
2343 2616
2309 1979
2030 2165
2187 2026
1923 2254
2464 1917
2330 2144
2122 2201
2068 2259
2283 2054
2290 2590
1921 1973
2579 2593
1926 136
2418 2601
2264 136
2323 2356
2339 2409
2500 2655
2649 2451
2364 2627
2283 2081
1988 2170
2003 2101
2086 2604
2194 2319
2459 1973
2164 2257
2347 2010
1959 2511
2582 1939
2308 2324
1941 1947
2592 2292
2467 2033
2054 2243
2646 2369
2482 2542
2002 2250
2220 2308
2504 2064
2609 2054
2001 1980
2180 2458
2414 2495
2153 2203
1943 2307
2520 2504
2603 2294
2253 2045
2043 1983
2549 2619
1929 2356
2302 2194
1970 2396
2381 1925
2543 2285
2251 2644
2602 2306
1984 2098
2334 2468
1947 1954
2372 2039
1997 2549
2418 2521
2131 2206
2601 2551
2423 2121
2200 1962
1946 2188
2623 2495
2037 1943
2516 2169
2475 2516
2608 2241
2218 2477
2465 2333
2365 2001
1985 2188
2331 2504
2485 2428
2611 2131
2111 2328
2244 2495
2356 2123
2554 2410
2180 2567
2111 2203
2061 2626
2351 2137
2067 2584
1958 2097
2022 1958
2420 2081
2547 2232
2264 2461
2040 2489
2074 1984
2315 2282
2351 2087
2138 2417
2194 2642
2125 2250
2047 2543
2578 2201
2001 2538
2340 2253
2592 2351
1917 2275
2201 1917
2370 2482
2139 2619
2588 2038
2460 2311
2249 2332
2615 2520
2125 1941
2418 2363
2345 2279
2328 2368
2328 2333
2087 2592
2423 2464
1920 2608
2410 2307
2489 2218
2271 1946
1958 1935
2488 2286
2333 2390
2282 1970
2196 2351
2229 2136
1971 2086
2149 2643
1966 2261
2282 2289
2103 2433
2499 2550
2292 2279
2552 1946
2276 2266
2607 2408
2093 2046
2037 2468
2154 2564
2139 2103
2276 2593
2176 2032
2220 2229
2149 2333
2623 2446
2276 1979
2654 2299
2153 2125
2011 2447
2142 2615
2308 2093
2127 2384
2510 2567
2072 2597
2109 1966
2110 2101
2655 2348
1986 1943
2123 2409
2615 1984
2410 2606
2630 2575
2506 2046
2610 2226
2220 1962
2271 2147
2239 2267
2507 2356
1979 2374
1986 2586
2101 2415
2081 2235
2077 2418
2404 2468
2331 2654
1991 1950
1918 2611
2658 1968
2087 1941
2315 1940
2119 2412
2161 2547
2639 2116
2109 2638
2229 2164
2323 1929
2132 2518
2526 1993
2559 1925
2573 2083
2341 2238
2206 2408
2359 2201
2329 2093
2071 2052
2062 2315
2215 2292
2279 2198
2607 2045
2317 2129
2254 2138
2263 2558
2420 2315
1984 2104
2539 2623
1979 2005
2333 2246
1928 2013
2489 2311
2180 2327
2233 2516
1927 2583
2506 2560
2123 2098
2099 2313
1718 2475
1983 1938
2390 2081
2115 1986
1577 2377
2429 2237
2574 2506
1943 2329
2261 2188
2561 2233
2066 2047
2340 2575
2078 2064
2498 2471
1917 2363
2601 2020
2419 2519
2188 2606
2133 2072
2376 2532
2052 2319
2030 2334
2339 2551
2594 2289
2608 2176
2086 2112
2460 2340
2385 2039
2009 1995
2191 1940
2143 2061
2259 2443
2047 1936
2074 2104
2240 2139
2084 2409
2199 2351
2032 2071
2386 2308
2492 2532
2196 2463
2492 2552
2369 2103
2593 1984
2532 2376
2586 2115
2492 1985
2028 2039
2607 2253
2093 1953
2438 1939
2336 2491
2359 2654
2354 2139
2053 2039
1997 2078
2069 2220
2607 1953
2277 2145
2461 2345
2462 2073
2047 2036
2150 2374
2290 1938
2235 2537
2420 2194
2586 2550
2133 2372
2538 2585
1577 2605
1920 2351
1948 2143
2415 2161
2309 1918
2042 2333
1945 1954
2118 2108
2523 2566
2218 2552
2604 1917
2410 2275
2553 2056
2521 2326
2507 2067
2123 2615
2246 2125
2172 2078
1984 2090
2468 2561
2286 1930
2485 2220
2465 2087
2246 2642
2615 2253
2365 2202
2390 2110
2408 2482
2591 2359
2409 2154
2363 2095
2313 2406
2294 2196
1939 2235
1964 2288
2529 2413
2300 2347
2464 2615
2590 1993
2056 2539
2047 2310
2283 2031
2576 2123
2313 2656
2333 2629
2073 2369
2460 2108
2363 2655
2090 2559
2199 2438
1966 2323
2188 2348
2048 2296
2140 2216
2551 2563
2608 2451
2247 2081
2020 2485
2408 2206
1932 2567
2053 2038
2324 1917
2104 1925
2194 2183
2329 2115
1953 2220
2602 2154
1920 2617
1983 2093
1916 2203
1970 2132
2174 2384
2491 2292
2533 2250
2118 2489
2299 2430
1962 2370
2134 2385
1938 2352
2283 2508
2590 2033
2504 2428
2169 2279
2088 2495
2261 2172
2326 2046
2546 2123
2464 2118
2436 2279
1947 2419
1983 2278
2389 2616
2259 2491
2574 2184
2122 2354
2607 2356
2052 2555
2487 2301
2007 2617
2630 2056
136 2511
2140 2561
2098 2005
2655 2030
2187 2132
2554 2495
2122 2069
2428 2339
2328 2512
2244 2462
2549 2123
1953 2446
2112 2359
2393 2478
2003 2377
2381 2489
2599 2555
2418 2324
2363 2484
2142 2428
2122 2374
2397 2497
136 2337
2547 2149
2553 2559
2520 2340
2183 2007
2007 2414
2218 2233
2369 1918
2473 2608
2381 2507
2381 1953
2074 2098
1943 2306
1920 2127
2071 2643
2025 1957
2064 2073
2131 2600
2282 2597
2377 2294
2254 2475
2527 2595
2274 2384
2014 2364
2072 2117
2073 2532
2449 2594
2521 1986
2150 1962
2123 2591
2153 2081
2501 2649
2161 2032
2578 2033
2479 2377
2144 2087
2560 2073
2532 2593
2433 2045
1972 2538
2500 2033
2354 2020
2543 2233
2511 2133
2533 2282
2469 2410
2206 2095
2582 1932
2458 2268
2142 2046
1995 2159
2556 2542
2559 2460
2643 2420
2028 2653
2118 2078
2200 2611
2184 2139
2115 2142
1917 2124
2088 2602
1925 2190
1984 2467
2154 2229
2336 2183
1577 2419
2363 2124
2520 2573
2467 2331
2418 2064
2179 2123
2489 2201
2472 2283
2471 1940
2560 2546
2429 2347
2447 2016
2134 2127
2240 2037
1972 2627
2276 2485
2295 2557
2102 2582
2369 2055
2223 2451
2436 2071
2128 2054
2655 2326
2275 2290
1962 2045
2509 2642
2656 2277
2386 2484
2107 1915
2121 2112
2083 1986
2473 2211
2280 2451
1945 2555
1951 2192
2542 2359
2353 1917
2225 136
2183 2148
2108 2306
2033 2275
2582 2471
2075 1947
2293 2592
2622 2486
2395 2109
2190 2083
1945 2343
2438 2390
2560 2428
2055 2331
2078 2033
2445 2087
2609 2347
1988 1992
2482 2309
2451 2054
2190 2331
2575 2088
2340 2352
2472 2598
2645 2011
2469 2428
2101 2264
2264 1577
2423 2348
2324 2046
2331 1989
2460 1953
2617 2415
2564 2551
2149 2319
2461 2224
2183 1955
2601 2532
2319 2151
2020 2464
2624 2539
2510 2246
2509 2054
2559 2229
2659 2424
2482 2423
2351 2052
2484 2095
2356 2630
2492 2098
2467 2484
2294 2203
2187 2125
2582 2283
2117 1945
2102 2246
2384 2609
2381 2108
2117 2319
136 2292
2247 1932
2645 2636
2257 2074
2224 2062
2153 2508
1945 2511
2638 2078
2052 2475
2221 2344
1955 2289
1970 1952
2551 1979
2004 1919
2625 2654
2590 2121
2370 2526
2543 2133
2586 2201
1925 2140
2319 2461
1994 2196
2643 2232
2077 2381
2164 2290
2527 2443
2384 1994
2468 2109
2348 2469
2356 2615
2533 2567
2278 1953
2202 1957
2352 2220
2060 2395
2657 2645
2469 2624
2213 2124
2369 2520
2274 2081
2498 2223
2438 2434
2117 2198
2478 2073
2348 2115
2040 2363
2420 2187
1925 2058
2652 2062
2338 2052
2236 2628
2220 2309
2087 2343
2395 2561
2555 2332
2333 2343
2200 1985
2203 1916
1940 2502
2053 2629
2267 1970
2369 2554
2554 1946
2348 2352
1940 2533
2544 2533
2478 2309
2127 2319
2500 1997
2359 1917
2026 2369
2112 2521
2128 1961
1920 2372
1971 2188
2489 1941
1951 2157
2508 1577
1932 2191
2643 2333
2446 2520
2504 2601
2089 2049
2140 2275
2210 2073
2303 2300
2299 2261
2374 1971
2336 1920
2550 2093
2416 2603
1577 2132
2332 2071
2496 2279
1932 2516
2451 2344
2384 2102
2546 2253
1993 2123
2242 2610
2322 2313
1983 2069
2108 1971
1959 2187
2028 2149
2564 2131
2183 2491
2236 2152
1718 2102
1984 2086
1950 2626
2264 2267
2586 2084
2139 2093
2104 2334
2121 2354
2429 2611
2253 2339
2392 2139
2299 2331
2132 2642
2084 2218
2098 2462
2271 2630
2564 2244
2491 2223
1918 2353
2649 1940
2127 2592
2190 2122
2213 2088
2220 2484
2642 2304
2363 2212
2289 2133
2649 2605
2172 2500
2318 2038
2224 1955
1718 2187
2624 2084
2568 2501
2290 2352
2071 2032
2495 2638
2037 2526
2103 2090
1957 2585
1931 2225
2059 2352
2266 2334
2033 2118
2115 1962
2233 2324
2363 2299
2636 1980
1940 2138
2574 2098
2140 2507
2474 2023
2216 2218
2459 1928
1966 2356
2039 2149
2579 2354
2521 2020
2345 2344
1989 2423
2020 2607
2339 2354
2158 2488
2451 2189
2532 1971
2643 2071
2561 2139
1985 2526
2240 2489
2604 2520
2212 2154
2463 2289
2111 2438
2491 2128
2297 2022
2128 2436
2658 2004
2635 2224
2624 2477
2551 2033
2518 2283
1946 2462
2279 1947
2448 2402
2135 2268
2368 2332
2347 2095
2187 2180
2433 2542
2304 1916
2284 2538
2467 2323
1983 2559
2351 2128
2093 2446
2488 1964
2469 2040
2500 2591
2220 2275
2238 2251
2062 2221
2123 2460
2140 2073
2300 2073
2607 2201
2530 2385
2515 2444
2573 2485
2598 2128
2284 2097
2638 2601
2308 2060
2038 2187
2218 2560
1989 2216
1940 2071
2215 2592
2121 2347
1958 2027
2384 1959
2137 2573
2409 1953
2646 2240
2045 2433
2188 2564
2369 2237
2419 2637
2135 2302
2293 2087
2345 2443
2554 2611
2624 2521
2184 2476
2409 2348
1984 2348
2102 2617
2071 2567
2028 1718
2278 2462
2654 2326
2116 2660
1955 2127
2062 2161
2604 2020
1946 2037
2323 2103
1939 2072
2354 2172
2633 2364
2174 2325
2361 2089
2537 2235
2059 1989
2512 2510
2212 2386
2598 2328
2560 2005
2046 2563
2381 2290
2499 2578
1918 2460
2032 2458
2495 2088
2190 2069
2211 2291
2601 2005
2392 2478
2244 2043
2370 2058
2078 2615
2479 2101
2604 2046
2043 2253
2308 2549
2210 2037
2088 2550
136 2538
1942 2611
2344 2047
2074 2179
2140 2266
2165 2492
2244 2308
2438 1959
2369 1979
2010 2512
2460 2578
2054 2279
1985 2020
2069 1925
1984 2376
2543 2102
2646 2477
2461 2099
2498 2616
2592 1920
2492 2112
2655 2446
2275 2551
2060 2352
2308 2271
2101 2458
2401 2398
2251 1915
2177 2333
2479 1981
2131 2326
2460 2064
2088 2233
2552 2140
2501 2603
2369 2624
2037 2654
2086 2103
2601 2638
2150 2326
2327 2468
2404 2386
2238 2160
2063 2005
2118 2033
1938 2591
2567 2135
2241 2117
2385 2572
1983 2331
2018 1995
1959 2087
1465 2028
2038 2345
2410 2139
2399 1970
2275 2559
2491 2629
2389 2459
2339 2563
2402 2371
2505 1964
2129 2120
2623 2131
2611 2044
2547 2102
2059 2063
2598 2194
2075 2003
2010 2649
2243 2223
2386 2370
1986 2352
2058 2564
2040 2347
2376 2553
2604 2121
2594 2344
1945 2643
2221 2226
2526 2467
2604 2309
2415 1947
2639 2365
2593 2290
1916 2304
1976 2459
2489 2220
2210 2561
2372 2133
2083 2507
2033 2220
2090 2271
2498 1947
2356 2611
1718 2547
2261 2353
2188 2554
2553 2369
2323 2391
2176 2081
2539 2140
2500 2542
2253 2201
2542 2307
2036 2047
2102 2498
1927 1954
2363 2423
2290 2607
2261 1918
2629 2512
2266 2184
2001 2192
2356 2139
2271 2233
2184 2468
2271 2363
2523 2049
2462 2561
2602 2551
2220 2370
2060 2433
2536 1993
2311 2233
2500 2611
2520 2495
2546 2306
2083 2073
2139 2069
2356 2602
2240 2104
2448 2049
1983 2561
2563 2165
2112 2233
2056 2376
2604 2276
2364 2268
2332 2475
2242 2209
2420 2028
2223 2512
2045 2309
2604 2395
2386 2504
2059 2077
2509 2518
2354 2083
2353 2586
2469 2593
2638 2309
2300 2334
2382 2456
2164 2559
2539 2395
2306 2154
2485 2638
2435 2297
2414 2600
2550 2615
2116 2061
2386 1966
2643 2336
2537 2194
2203 2169
2463 2567
2610 2176
2624 2352
2563 2414
2590 2553
2564 2275
2150 2624
2061 1980
2576 2092
2377 2143
2430 1983
2231 2158
2124 2306
2056 2278
2394 1939
1964 1965
2602 2607
1926 1955
2210 2495
2240 2478
1988 2622
2333 2068
2543 1971
1929 2630
2404 2276
2572 2543
2289 2125
2440 2107
2253 2229
2458 2264
2218 2108
2261 2611
2423 2600
2555 2345
2619 2220
2243 2387
2203 2491
2333 2135
2189 2071
1941 2229
2414 2331
2271 2218
2077 2606
2348 2446
2567 2642
2305 2111
2386 2369
2282 1939
2546 2564
2272 2325
2324 2045
2244 2409
2555 1941
1940 2087
2192 2648
1940 2187
2121 1986
2053 2555
2080 2145
1914 2024
2138 2387
2257 2188
2348 2646
2660 2626
2128 2344
2306 2500
2352 2108
2214 2036
2261 2040
2258 2478
2179 2423
2516 2007
2500 2430
1999 2459
2551 2395
2394 2367
2300 1979
2046 2095
2561 2586
2315 1959
2237 2240
2088 2300
2181 2412
2319 2117
2473 2032
2386 2552
2139 2074
1932 2241
2536 2391
2603 1947
2418 2244
1955 2328
2052 2199
2556 1917
2344 2399
2121 2329
1927 1991
2030 2423
2302 2385
2564 2500
2171 1973
2425 2325
2383 2237
2032 2598
1941 2598
2337 2639
2598 2268
2053 2315
2590 1938
2266 2363
2478 2124
2616 2471
2500 2646
2560 2395
2356 2088
2611 1989
2332 2509
2543 1577
2368 2039
2588 2149
2390 2221
2032 2327
2229 2354
2078 2521
2319 2629
2206 2539
2624 2046
2447 1968
1971 2093
2030 1983
2124 2446
2409 2573
2071 2599
2081 2438
2538 1954
2468 1577
2399 2368
2275 1917
2276 2043
1983 2655
2000 2538
2059 2088
2619 2112
2500 2363
2615 2564
2447 2658
2240 2233
2038 2215
1929 2109
2592 2194
2266 2115
2645 2097
2500 2083
2615 2275
2644 2228
2495 2352
2211 2608
2467 1979
2125 1954
1980 2620
2043 2590
1965 2126
2368 2203
2611 1962
2150 2240
2133 2232
2024 2647
2347 2300
2641 2425
2629 2187
2560 2278
2055 2060
2328 2101
2183 1959
2436 2191
2233 2275
2386 1943
2624 2063
2369 1986
1932 2134
2244 2229
1925 2257
1950 2061
2194 2053
2464 2574
2184 2253
2172 2619
2223 1941
2423 2593
2030 2369
2235 2377
1953 2218
2282 2148
1958 2583
1966 1942
2594 2243
2641 2047
2547 1955
2213 2309
2161 2608
2103 2309
2107 2403
2246 2328
2048 2544
2064 1971
2005 2356
2627 2225
2582 2125
2077 2261
1923 2155
1941 2065
1970 2377
1929 2229
2234 2037
1984 2604
2235 2592
2190 2201
2073 2495
2552 2046
1920 2533
2477 2334
2022 1935
2149 1916
2118 2073
2438 2072
1973 1951
2390 2235
2054 2319
2554 2353
2505 1974
2611 1983
2516 2199
2323 2033
2257 2414
2526 1942
2261 2624
2385 2065
2012 1972
2004 1998
2646 2492
1995 2620
2049 2497
2139 2275
1987 1920
2559 1953
2336 2149
2418 2188
2018 1998
1941 2187
2059 2069
2492 2233
2052 2007
2526 2026
2038 2616
2209 1944
2098 1963
2469 2229
2331 1984
1920 2461
2519 2516
2109 1946
2461 2327
2482 2446
2547 2537
2308 2408
2563 1917
1943 1993
2398 136
2063 2331
2546 2536
2138 2117
2467 1966
1998 2583
2264 2473
2520 2395
2532 2190
2098 1984
2410 2044
2362 2480
1946 2276
2397 2628
2210 2233
2477 2446
2338 2598
2492 2600
2552 2131
2243 2479
2104 2299
2468 2549
2131 2547
2199 2468
2235 2294
2574 2309
2615 2553
2607 2631
2098 1971
2233 2237
2395 2340
1988 2399
2504 2409
2551 2139
2631 2573
2378 1980
2317 2402
2239 1941
2007 1955
2567 2151
1966 2275
2347 2071
2574 2619
2172 2359
2103 2586
2488 2035
2222 1970
2323 2210
2268 2642
2526 1962
2257 2376
2095 1943
2555 2617
2127 2223
2005 2601
2593 2086
2654 2554
2539 2326
2266 2369
1973 2016
2068 2232
2103 2560
2064 2532
2307 2220
2028 2461
2078 2482
2482 2392
2581 2367
2112 2586
2083 2331
2040 2123
1984 2218
2323 2093
2419 2318
2619 2590
2339 2331
1979 2559
2520 2546
2492 2118
2302 1964
2098 2229
2319 2338
2338 2283
2555 2420
2123 2521
2333 2509
2138 2127
2346 2159
2464 2030
1997 2200
2247 2368
2009 1951
2179 1946
2112 2140
2629 2196
1984 2043
2196 2117
2326 2103
2090 2131
2500 2601
2205 2416
2338 2512
2241 2194
2053 2203
2461 2367
2188 2374
1941 2039
2359 2542
1973 2018
2607 2489
2516 2594
1947 2292
2174 2336
2189 2542
2241 1920
2601 2200
2386 2234
2500 2237
2026 2333
2463 2498
2112 2090
2111 2519
2394 2294
2010 2273
2395 2118
2224 2254
2559 2446
1917 2482
2212 2309
2095 2103
1945 2047
2416 2038
2274 2511
2074 2347
2279 1920
2539 2005
2434 2199
1920 2458
2309 2103
2365 2027
2188 2376
2319 2002
2319 2111
2201 2575
2020 2201
2331 2324
1978 2497
2370 2309
2063 2600
2564 2112
2275 2500
2511 2054
2598 2609
2648 2585
2602 2278
2319 1948
2131 2593
2347 2148
2028 2283
2655 2083
2586 2037
2133 2194
2140 2593
2173 2335
2347 2308
2069 2190
2220 2088
2282 2594
2487 2094
2078 2348
2143 2365
2616 2610
2593 2392
2555 2052
2461 1948
2153 2010
2438 2458
2206 2088
1918 2324
2573 2376
2484 2104
2561 1938
2157 2171
2429 2381
2638 2299
2498 2333
2377 2302
2229 2654
2460 2109
2068 2445
2338 1920
1953 2095
2139 2500
2472 2285
2356 1985
1986 2485
1997 2381
2643 2111
2044 2266
2078 2554
2125 2282
2201 1962
2318 2415
2598 2347
2253 2131
2202 2284
2326 2549
2104 1966
2078 1986
2386 2630
2135 2597
2359 2546
2105 2238
2447 1951
1993 2059
2539 1979
2121 2469
2007 2144
2220 2615
2184 2309
1914 2025
2123 2387
2140 2352
2097 1927
2283 2399
2356 2604
1577 2292
2083 2115
2064 2060
2423 2150
1928 2171
2271 2560
2414 2340
2475 2199
2394 2471
2371 2119
1995 2171
2354 2625
1938 2374
2539 2423
2552 2190
1935 2171
2090 2077
2559 2323
2050 2435
2088 2275
2030 2374
2217 2540
2520 2044
2243 1981
2495 2276
1947 2151
1963 2056
1931 2658
2625 2340
2500 2306
2561 2307
2190 2495
2659 2192
2354 2469
2273 2039
2385 2592
2074 2033
2641 2246
2190 2123
2173 1975
1962 2059
2059 2579
2032 2465
1973 2006
2046 2395
1963 2428
2037 1971
2326 2073
2418 2233
1972 2143
2381 2352
2111 1981
2323 2374
2499 2521
2369 2150
2307 2559
2298 2125
2007 2135
2629 2279
2370 2030
2347 2063
136 2491
2549 2560
2399 2637
2027 2378
2069 2323
2111 2144
1988 2076
2339 1984
2053 2643
2398 2653
1916 1952
2471 2254
1914 2009
1940 2582
2201 2532
2020 1946
2282 2629
2045 2276
1955 2547
2333 2643
2339 2590
2347 2289
2187 2289
2308 2237
2343 2241
2103 1953
1929 2244
2294 2588
2317 2474
2196 2199
2428 2005
2200 2654
2444 2490
2500 2077
2464 1929
2428 2575
2598 2377
2229 2063
2504 2220
2102 2451
2001 2583
2088 2040
2126 2089
2121 2611
2571 2598
2126 2412
2237 2172
2374 2347
2308 2188
2643 2087
2399 2054
2307 2060
2463 1916
2644 2342
1990 2497
1718 2071
2590 1929
2100 2113
2282 2010
2220 2551
2462 2309
2451 2081
2322 2642
2354 1963
2629 2582
2033 2045
2542 2030
2489 2150
1989 2331
1919 2159
2539 2500
2142 2164
2143 2544
2332 2138
2636 2027
2604 1963
2073 2324
1941 2611
2104 2216
2629 2285
2615 2623
2619 2482
2046 2212
2149 2510
2597 1941
2218 2606
2112 2604
1979 1941
2654 2218
1970 2531
2324 2108
2116 1991
2646 2326
2384 2389
2194 2259
2202 2024
2573 2492
1946 2619
2543 2467
2381 2433
2404 2326
1941 2315
2010 1945
2629 2137
2127 2087
2511 2372
2049 2440
1926 1959
2332 2196
2307 2395
2363 2179
2617 2007
2201 2369
2475 2344
2433 1966
2543 2438
2418 2276
2603 2096
2199 2501
2638 2150
2275 1986
2289 2302
1913 2502
2509 2598
2189 2334
2420 1948
2005 2142
2142 2240
2326 2139
2430 2489
1993 2414
2581 2379
2500 2410
2597 2372
2597 2143
2183 2543
2240 2115
2482 2005
2053 2183
1982 2134
2307 2574
2607 2164
2071 1920
2520 2165
2593 2532
2111 2567
2420 2180
2392 2553
1997 2430
2047 2417
2385 2223
1979 2625
2578 2275
1998 2648
2335 2503
2334 2556
2283 2143
2077 2604
2575 2278
2022 2639
2368 2294
2409 2520
2231 2236
1964 2322
2601 2150
2199 1981
1971 2359
2578 2602
2657 2009
2184 2392
2561 2499
2139 2546
2526 2154
2414 2467
2132 2319
2220 2607
2074 2326
2539 2409
1948 2629
2218 2323
2593 2507
2575 2370
2376 2414
2153 2117
2247 2149
2271 2200
2125 1920
1941 1993
2072 2608
2235 2282
2546 2492
2574 2631
2571 2232
1955 2522
2026 2319
2338 2081
2561 1941
2533 2081
2154 2468
2347 1993
2615 2164
2560 2206
2212 2563
2629 2081
2134 2038
2183 1939
2606 2142
2189 2451
2165 2043
2328 2582
1985 2147
2420 2087
2092 2602
2201 2188
2060 1963
2122 2564
2398 1945
2124 2074
2030 2542
2590 2646
2017 2041
2206 2478
2061 2346
2142 2606
2149 2111
1929 2150
2638 2088
2464 2201
2093 2121
2190 2646
2110 2081
2151 1940
2374 2104
1925 2348
2150 2048
2348 2623
1970 1916
2278 2104
2449 2240
2104 2604
1959 2125
2653 2071
2511 136
2143 2491
2146 2145
2278 2059
2087 2007
2369 2591
2521 2109
2172 2271
2081 2072
2123 2504
2099 2126
2237 2549
2266 2190
2102 2351
2289 1940
2326 2142
1959 2325
2504 2307
2306 2340
2578 1966
1970 2603
2327 2161
2056 2395
2586 2005
2578 2521
2404 2359
2443 2387
2588 2325
2347 2533
2154 1986
2323 2418
2611 2165
2121 2257
2617 2199
2211 2425
2203 2531
1913 1577
2451 2463
2264 2458
2500 1985
2462 2408
2359 2462
2145 2566
2331 2339
2461 2198
2040 2550
2586 2604
2139 2121
2484 2290
2308 2507
1943 2542
2188 2122
2194 2537
2543 2630
2345 2047
2056 2573
2356 2172
1940 2292
1988 1924
2271 2352
1976 2337
2246 2117
2032 2471
2154 2607
2542 2391
2326 2131
2033 2550
2013 1972
2188 2646
1941 2257
2188 2356
2339 2607
2308 2484
2543 2309
2216 2104
2224 2151
2271 2123
2139 2359
2127 2533
1984 1946
2407 2142
2111 2042
2464 2369
2339 2266
1920 2543
2239 2642
2134 1577
2108 2073
2104 1984
2300 2104
2164 1942
2564 2352
2313 2099
2430 2354
2236 2317
2498 2199
2416 2133
2532 2521
2172 2602
2223 2649
2374 2593
2108 1953
2071 2196
2033 2233
2266 2064
2542 2607
2472 2384
1935 2006
2590 2063
2172 2098
2300 2638
2095 2607
2216 2142
1983 2553
2047 2436
2588 2134
2237 2190
2482 2086
2372 2196
2420 2053
2602 2266
2467 2090
1966 2624
2430 2334
2627 1957
2290 1963
2339 1997
2233 2123
2266 2392
2061 2658
2307 2179
2103 2476
2261 2073
2133 2247
2560 2299
2140 2484
2087 2543
2539 2354
2542 2229
2306 2578
2115 2190
2004 2627
1971 2543
2090 2309
2081 2282
2630 2172
2564 2074
2469 1917
2189 2543
2296 2289
2420 1932
2597 2332
2370 2139
2434 2294
2278 2506
2391 2147
2060 1979
2526 2469
2638 1946
2056 2350
2140 2347
2362 2289
2112 2354
2370 2607
1946 2564
2404 2090
2601 2590
2279 2002
2618 2130
2331 2123
2359 2489
2266 2179
2504 2005
2391 1943
2121 2619
2568 2274
2630 2507
2327 2247
2291 1926
2593 1946
1971 2307
2117 2555
1925 2561
2183 2282
2146 2129
2258 2266
2374 1925
2415 2075
2081 2267
2588 2071
2083 1962
2288 2044
2124 2395
2604 2059
2526 1979
2560 2345
2376 2109
2075 2479
2307 2428
2276 2655
2324 2530
2007 2151
1972 2660
1999 2006
2648 2364
2592 2176
2615 2240
2299 2233
2138 1945
2163 2328
2376 2088
2188 2611
2637 2480
2623 2340
2212 2266
2646 2564
1985 2550
2165 2095
2611 2324
2369 2300
2068 2588
2611 2454
2241 2302
2108 2624
2083 2631
2381 2307
2165 2623
2074 2331
2590 2308
2097 2660
2103 2561
2642 2322
2627 1973
2396 2280
2526 2414
2236 2580
2187 2047
2213 2040
1973 2636
2199 2508
2149 2273
2093 2409
2606 2253
2047 2039
2267 2385
2275 2549
2144 2384
2126 1975
2032 2149
2071 2268
2218 2139
2241 1947
2455 1915
2597 1945
2012 2018
2370 2347
2593 2037
2511 2294
2543 2516
1927 1957
2052 2138
2372 2336
1941 2530
2233 2121
2123 2046
2384 2351
2502 2283
2078 2045
2224 2187
2384 2653
2052 2149
2064 2469
2394 1945
2361 1934
2171 2022
2122 2326
2428 2092
2220 2482
2323 1953
2631 2611
2309 1971
2053 2394
2463 2176
2102 2127
2395 2462
2423 2352
1948 2434
2623 2140
2063 2549
2124 2142
2286 2175
2111 2246
2135 2196
2642 2333
2224 1948
1959 2264
1966 1993
2174 2032
2240 2088
2096 2390
2372 2068
2594 2617
2516 2319
2602 2560
2591 2229
2340 1963
2220 2575
2554 2539
1973 1954
2461 2509
2504 2556
2117 2325
2095 1979
2319 2052
2591 2520
2468 2103
2344 2183
2432 2438
2655 2005
2654 2131
2292 2351
2507 2532
2058 1925
2035 2618
2534 1990
2501 2054
1927 2337
2061 1921
2502 2028
1943 2414
2104 2539
2272 2362
2639 1998
2344 2282
2500 2607
2202 2389
2290 2418
2348 2142
2352 2122
2060 2376
2022 2116
2293 2071
2142 2546
1983 1918
2223 2543
2546 2477
2261 2414
2064 2136
2102 2533
2619 2546
2395 2334
2546 2103
2348 2550
1935 2657
2399 2544
2154 2347
2553 2122
2494 1958
2356 2554
2521 2638
2502 2267
2403 2286
2410 2339
2458 2598
2655 2549
2111 1994
2244 2078
2172 2103
2598 2304
2091 2035
2647 2620
2510 2471
2408 2165
2104 1953
2061 2143
2325 2138
2037 2164
2180 2283
2536 2340
2090 2386
2206 2213
2543 2544
2229 2098
2134 2333
2386 2139
1951 1968
2558 2621
2201 2030
2064 2489
2376 2356
2542 2646
2604 2619
2363 2064
2140 2290
2115 2423
2088 1943
2638 2077
2201 2123
2047 1959
1941 2491
2604 2323
2579 2233
2592 2283
2285 2032
2071 2254
2563 2212
2242 2176
1986 2086
2151 2174
2482 2386
2093 2095
2476 2184
2384 1973
2266 2307
2567 2040
2040 1979
1931 1991
2467 2078
2495 2623
2513 2426
2045 2615
2189 2203
2131 2495
2299 2356
2451 2007
2197 2099
2423 2369
2555 2102
2656 2080
1966 2625
2131 2476
136 2543
2038 2102
2468 1953
2624 2552
2259 2215
2261 2602
2518 2226
2423 2064
2451 2187
2367 2145
2220 2408
1947 2594
2143 2336
1943 2520
1985 1925
1918 2261
2326 2121
2169 2038
2253 2553
2467 2237
2635 2367
1943 2092
2121 2233
2199 2344
1948 2153
2177 2304
1929 2005
2363 2324
1987 2273
2279 2071
2203 2509
1965 2325
2101 2479
2491 2194
2464 2578
2201 2546
2047 2510
2344 2072
2491 2138
1942 1984
1929 2381
2271 2539
2151 2052
2043 2164
1999 2012
2201 2244
2495 2140
2477 2354
2139 2172
2537 2451
2463 2283
2386 2064
2053 2332
2356 2352
2546 2554
1948 2471
2374 2309
2163 2198
2058 2552
2377 2511
2324 2507
2326 2122
2117 2582
2280 2345
2329 2140
2246 2567
2340 2154
2478 2142
2564 2271
2570 2577
2489 2564
2103 2468
2485 1918
2109 2468
2241 2649
2257 1953
2229 1943
2232 2111
1979 1943
2331 2352
2063 2467
2242 1964
2314 2540
2538 2640
2475 136
2134 2068
2233 2591
2026 2002
2351 2516
1970 2452
2161 2328
2184 2040
2559 2407
2603 2062
1938 2521
2299 2266
2394 2451
1946 2499
2026 2127
2332 1932
1964 2126
2047 2148
2398 2594
2574 2218
2131 2418
2543 2643
2024 2620
2563 2602
2138 2134
2336 2196
2589 2598
1989 2500
2619 2150
2253 1979
2365 2012
2287 2244
2319 2007
2145 2038
2386 2324
2579 2118
2521 2601
1972 2009
2151 2319
2064 2122
2280 2635
2121 2600
2289 2343
2347 1938
2086 2654
2418 2229
2188 2005
2588 2292
2201 2040
2654 2020
2202 1919
2121 2526
1949 2236
2445 2223
2319 2196
1973 1972
2343 1718
2542 2093
2608 2189
2488 2228
2330 2336
2272 2211
2275 2363
2142 2115
2489 2033
2030 2564
2593 2140
2336 2384
1917 2188
2271 2625
2040 2331
2275 2495
1986 2593
2083 2206
1986 2331
2462 2573
2536 2065
2404 2212
1993 2300
2559 2275
2109 2559
2625 2477
1997 2095
2533 2333
1984 2507
1465 2336
2139 2237
2142 2512
2460 1938
2257 2095
2554 2593
2308 2077
2520 2638
1983 2266
2326 2446
2220 2353
2399 2241
2375 2548
2372 2176
2139 2532
2171 2658
2638 2179
2560 1946
2336 2305
2494 2171
2159 1968
2376 2074
2073 2060
2142 2165
2479 2235
2383 2482
2523 2120
2198 2463
2521 1979
2598 2203
2465 2533
2165 2300
2143 2620
2331 2526
2299 2257
2111 1916
2084 2348
2578 2625
2511 1920
2300 1993
2031 1926
2150 2352
2592 2336
2226 2296
2492 2623
2601 2299
2352 2063
2064 2078
2354 2499
2184 1917
2078 2150
2602 2118
2247 2509
2104 2550
2558 2051
2383 2507
2331 2093
2410 2625
2071 2330
2384 2592
1985 2553
2059 2353
2081 2135
2515 2076
2140 2506
2040 2233
2482 2526
2133 2038
2461 2351
2327 2002
2622 2515
2602 2233
2625 1983
2026 1940
2597 2315
2159 1950
2496 2543
2271 2551
2625 2574
2559 2060
2575 2188
2028 2194
2115 2542
2317 2540
2184 2154
2575 2334
2416 2289
2237 2482
2130 2341
2556 2306
2467 1983
2207 2349
2592 1941
2607 2347
2033 2266
2536 2060
1970 2509
2278 1929
2551 2326
2501 2161
2552 2433
1943 2611
2142 2037
2619 2395
2077 2553
2299 2020
2410 2300
2206 2046
2250 2384
2560 2356
2262 2092
2575 2532
2224 2533
2085 2048
2607 2104
2043 2423
2176 2241
2149 1577
2078 2020
2533 2143
2273 2519
2030 2593
2351 2302
2183 2511
2384 2125
2196 1940
2213 2506
2539 2607
2428 2551
2294 2458
2423 2188
2172 2154
2494 2645
2372 2191
2002 2199
2626 2027
2047 2644
2152 2373
1925 2542
1998 2626
1972 2435
2077 1993
2287 2150
2409 2140
2212 2356
2346 2061
2275 2184
2198 2038
1577 2510
2460 2564
2018 2378
2340 2404
1942 2164
2196 2336
2266 2257
2625 2229
2144 2333
2257 2033
1993 2601
2115 2601
2566 2186
2169 2368
1932 2068
2351 2347
2489 2326
2074 2045
2347 2302
2052 2384
2620 1976
2129 2260
2075 2072
2253 2275
2094 2301
2095 2112
2059 2593
2268 2583
2313 2317
2449 2631
2369 2655
2399 2125
2388 2313
2253 2563
2491 2594
1964 1944
2475 2498
2254 2215
2267 2547
2361 2488
2293 2267
2560 1986
2529 2463
2085 2581
2504 2623
2645 1999
2201 1983
2581 2302
2588 1940
1993 1929
2033 2556
2131 2546
1945 2174
2187 2183
2428 2212
2040 1984
2178 2316
2617 2153
2172 2216
2537 2336
2338 2203
2040 2631
2098 1979
2136 1997
2216 2386
2369 2216
2085 2265
2200 2356
2329 2142
2287 2206
2077 2526
2116 2016
2093 2103
2415 2110
2526 1938
2140 2104
2212 2654
2344 2054
2042 2544
2127 2176
2356 2244
2240 2556
2299 1984
2552 2590
2061 1927
1986 2381
2575 2550
2512 2319
2278 2123
2466 2255
2501 2438
1940 2344
2278 2303
2315 2319
2055 2542
2075 2652
2589 2510
2229 2553
2602 2449
2163 2223
2282 2451
2299 2611
2103 2428
2482 2240
2617 2594
2033 2469
2042 2183
2611 2299
2629 2007
2005 2564
1926 2283
2239 2385
2589 2047
2600 2433
2051 2313
1941 2420
2611 2124
2206 1938
2391 2404
2077 2218
2043 1929
2567 2153
2280 1926
2253 2140
2075 2434
2655 2600
1925 2340
2047 2572
1918 2630
1917 2549
2047 2283
2047 2068
2414 2446
2095 2190
2164 2526
2418 2123
2591 2307
2273 2125
2333 2582
1976 2022
2649 2144
2199 2530
1993 2121
1984 2573
2636 2633
2028 2605
2521 2578
2228 1964
2488 2277
2330 2451
2381 2376
2185 1923
2351 2629
2306 2063
2150 2395
2052 2047
2206 2188
2060 2206
1919 1973
136 2254
2374 2078
1943 2257
2336 2643
2446 2073
2311 2234
1915 2107
2367 2032
2025 2648
2611 2188
2140 2278
2591 2090
2592 2396
2498 2149
2536 1966
2222 2110
2073 2340
2404 2234
2492 2467
2462 2467
2267 2161
2016 1998
2339 2300
2084 2393
1918 2347
1959 2026
1997 1966
2241 2047
2446 2083
2492 2395
2201 2550
2052 2053
2619 2591
2543 2206
2006 1972
2412 1922
2040 1985
2486 2255
2092 2200
2507 2104
2064 2526
2347 2547
2369 2118
2614 2656
2471 2283
2256 2291
2283 2007
2428 2423
2499 2234
2352 2287
2053 2191
2088 2154
2205 2141
2623 2218
1984 2308
2045 2550
2446 2244
2512 2279
2062 2229
2549 2551
2292 2071
2313 2440
2201 2150
2213 2278
2276 2591
2430 1938
2323 2564
2187 2295
2513 2444
2591 1917
2151 1945
2125 2072
2624 2563
2176 2282
2438 2274
2363 1938
1917 2564
2077 2575
2619 2560
2023 2361
2624 2229
2007 2127
2299 2504
2189 2476
2046 2206
2381 2542
2507 2546
2409 1938
2381 2623
1983 2329
2133 2368
2629 1954
2069 1943
2468 2258
2591 2172
2430 2104
2273 2518
2299 2607
2565 2017
2275 2348
2110 2221
2223 2187
2629 2039
2125 2642
2495 2370
1951 2659
2122 2410
2086 1917
2261 2506
2037 2433
2630 2619
2593 2363
1916 1939
1945 2189
2098 2428
1465 2319
2042 2543
1951 1991
2059 2165
2290 2370
1976 2159
2654 2386
2537 2328
2083 2469
2323 2122
2028 2295
2126 1922
1929 2624
2298 1944
2603 2054
2553 1993
2510 2511
2633 2620
2218 1983
2482 2559
2409 2423
2463 1955
1973 2583
2088 2386
2620 2459
2394 2571
1943 2619
2356 2410
1919 1931
2475 2471
1952 2226
2136 2030
2646 2624
2211 2406
1975 2158
2237 2309
2173 2156
2585 2297
2377 1939
1718 2267
1941 2367
2538 2626
2176 1718
2285 2351
2472 2571
2464 2309
2242 2362
2144 2649
2347 1966
1945 2007
2054 2643
2549 2408
1943 1997
2601 2655
2367 2224
1985 2063
2604 2005
2578 1918
2627 2202
2087 1969
2397 2049
2121 2309
2414 2229
2323 2429
2440 2371
2139 2428
2520 2348
2117 2254
2041 2017
2006 2626
2306 2543
2597 2264
2109 2601
1945 2345
2347 2428
2401 2622
2271 2374
2161 1947
2343 2327
2063 2376
2384 1577
2289 1948
2554 2271
2191 2498
2188 2309
2088 2104
2532 2604
2369 2045
2018 2459
2329 2578
2630 2607
2622 2426
2399 2516
2655 2045
2309 2607
2381 2554
136 2135
2567 2268
2053 2384
2157 2268
2368 2102
2114 2008
2020 2624
2372 2081
2090 2331
2331 2423
2452 2182
2131 2069
2148 2194
1939 2434
2464 2150
2463 2471
2578 2499
2102 2463
1962 2579
2615 2638
2464 2140
2323 1979
2567 2233
2355 2459
2611 1918
2063 2104
1921 2378
2163 2368
2464 2064
2463 2250
1925 2218
2331 2407
2474 2133
2266 2233
2636 1973
2543 1984
2604 2573
2311 2139
2648 2004
2567 2007
2579 2655
1917 2308
2278 2340
1953 2045
1981 2007
2042 2508
2050 2645
1938 2121
2628 2361
2511 2333
2309 2386
1975 2119
2501 2598
2565 1996
2539 2526
2473 2327
2574 2037
2002 2304
2133 1916
2499 2165
2468 2467
2542 2098
2072 2510
2275 2408
2583 2659
2246 1926
2290 2606
2556 2521
2063 1917
2491 2315
2294 1939
2410 2354
2372 2268
2246 2169
2244 2275
2151 2436
2220 2218
2088 2423
2328 2588
2573 1989
2324 2150
1946 2374
2607 2526
2149 2330
2512 2133
1945 2199
2433 2190
2059 2404
2314 2503
1979 2520
2340 1946
2053 2451
2060 2323
2509 2582
2315 2417
2417 2289
2649 2508
1984 2484
2469 2561
2510 2336
2154 2542
2214 2318
2620 1968
2040 2526
1966 2464
2033 2654
2578 2030
2617 1945
2052 1932
2654 2220
2302 2042
2619 2542
2347 2578
2485 1986
2390 2101
1990 2314
2187 2588
2520 2064
2369 2575
2074 2520
2172 2063
2586 2602
2237 2244
2047 2268
2202 2364
2127 2643
2550 2142
2369 2430
2430 2067
2469 2353
1577 2039
2005 2308
1577 2319
2549 1971
2313 2371
2129 2313
2592 2598
2121 2467
2126 2659
2081 2343
2384 2344
2228 2448
2461 2419
2623 2190
2139 2550
2172 2261
2244 2638
2266 2086
2573 2212
2084 2602
1934 2091
2047 2475
2598 2399
2462 2206
2392 2404
1938 2554
2354 2073
2142 2118
2542 2454
2102 2459
2090 2123
2135 2042
1970 2471
2536 2553
2604 2073
1984 2112
2189 2336
2347 2546
2401 1988
2462 2376
2201 2590
2484 2553
2339 2359
2400 2102
2198 2471
2115 1917
2172 2654
2507 1979
2031 2232
2543 2043
2458 2068
2581 2324
2009 2459
2104 1943
2159 2659
2645 2660
2282 2338
2408 2121
2623 2020
1942 2564
2054 2491
2150 2115
2349 2170
2655 2578
1946 2109
1960 2577
2198 2283
2096 2480
1947 2479
2237 2306
2268 2292
2068 2087
2334 2550
2149 2419
2164 2613
2151 2368
2250 2039
1918 2482
2282 2543
2549 1979
2409 2007
2081 1926
2216 2408
2543 2355
2290 2056
2458 1939
2073 2122
2408 2623
2292 2138
2169 2461
2468 1971
2111 2592
2056 2311
2586 2551
2176 1926
2445 2047
2575 2353
2159 2116
2503 1978
2497 2397
2229 2631
1938 2095
2200 2299
2088 2624
2446 2122
2619 2290
2005 2477
2002 2226
2198 2518
2553 2276
2648 2640
1928 2157
2384 2333
2073 2206
2516 2047
2083 2190
2132 2048
2197 1964
2559 1993
2602 2299
2294 2415
2631 2253
2460 2339
2078 2218
2391 2381
2537 1939
2338 2068
2324 2347
2328 1947
2125 1948
2416 2557
2233 2460
1951 2633
2172 2611
2224 2519
2268 2149
2150 2573
2386 2418
2007 2547
2223 2508
2611 2428
2001 2657
2134 2194
2176 2406
2598 2344
2660 2284
2271 2179
2408 2546
2654 2121
2279 2026
2143 2087
1964 2066
2488 1975
2122 2229
2325 2367
2266 2290
2011 1951
2594 2153
2311 2428
2171 2627
1989 2573
2364 2647
2575 2339
2374 2077
2629 2054
2352 2607
2649 2598
2005 2504
2504 1918
2075 2327
2022 2000
2543 2469
2381 2430
1917 2165
2372 2293
2123 2428
2341 2456
2482 2108
2039 1932
2190 2165
136 2024
2623 1985
2329 2586
2055 2543
2154 2549
2506 2108
2600 2007
2414 2521
2231 2322
2598 2243
2331 2467
2411 2313
2261 1946
2617 2127
1972 1976
2285 2174
2574 2131
2064 2059
2601 2244
2645 2346
2206 2121
2261 2093
2024 2159
2395 2611
2648 2159
2369 2266
2342 2051
2090 2526
2026 2531
2097 1958
2328 2372
2220 2311
2333 2026
2045 2352
1971 2088
1999 2583
2275 2560
1959 2143
1962 2446
2656 2562
2480 2318
2408 2395
2563 2213
2631 2188
2543 2289
2103 2188
2436 2135
2620 2647
1938 2037
136 2283
2428 2037
2643 2068
2157 2018
2405 2146
2606 2240
1929 2112
1939 2333
2461 2384
2338 2347
2294 2174
1943 2059
2520 2124
1953 2290
1918 2484
2212 2244
1947 2328
2273 2133
2233 1985
2309 2275
2529 2127
2276 2601
1718 2223
2542 2539
2150 2625
2060 2625
2445 2436
2477 2646
2138 2394
2347 2550
2330 2302
2590 2164
2593 2055
2339 2329
2577 2156
2257 2323
2425 2642
2032 2282
2280 2032
2131 2150
2491 2653
2412 2107
2142 2098
2340 2118
2086 2467
2551 2543
1465 2239
2005 2625
2086 1946
2156 2424
2579 2347
2292 2465
2430 1997
2449 1986
2172 1929
1941 1920
2578 1985
2098 2233
1938 2604
2447 2364
2139 2063
2564 2477
2304 2161
2418 2423
2055 2347
2040 2240
2539 2088
2343 2199
2417 2264
2606 2084
2372 2643
2619 1983
2363 2020
2624 2482
1989 2112
2640 2620
2625 2216
2560 2266
2306 2020
2200 2112
2420 2384
2411 2523
2102 2612
2142 2449
2074 2499
2607 1917
2241 2203
2467 2334
1991 2011
1987 2344
2546 2104
2338 2343
2491 2555
2646 2037
2028 2289
2165 2553
2244 2045
2604 2098
2499 2112
2557 2117
2073 1938
2619 2115
2176 2555
2354 2348
2336 2072
1943 2630
2078 1941
2127 2463
2430 2323
2071 1932
1955 2461
1986 2064
2551 2150
2161 2594
2026 2434
1983 2512
2583 2647
2151 2153
2617 2328
2267 2176
1971 2356
2187 2635
2616 2400
2064 2331
2005 1953
2253 2078
2611 2353
2559 2240
1970 2389
2142 2226
2125 2241
2140 2578
2598 2292
2347 2631
2367 2226
2135 2187
2188 2261
2108 2308
1988 2426
2072 2479
2331 2561
2366 1926
1985 2586
2131 2500
1577 2328
2125 2053
2586 2607
2040 2271
2384 1926
2220 2600
2241 2543
2194 2347
2220 2593
2293 2081
2319 2153
2007 2512
2047 1987
2410 2554
2586 2356
2504 2323
2333 2224
2226 1970
2326 2299
2088 2352
2165 1985
2127 2396
2508 2445
2207 2076
2111 2293
2101 2111
2329 2309
2295 2028
2504 2564
2399 2134
2370 2073
2039 2597
2194 2384
2489 1993
2399 2052
2326 2575
2444 2513
2404 2060
2469 2348
2280 2072
1989 2590
2140 1917
1948 2302
1955 2589
2626 1950
2356 2381
2351 2510
2378 2225
2093 2564
2408 2593
2592 2294
2062 2002
1985 2033
2022 2657
2408 2363
2134 2279
2280 2390
2561 2064
2028 2250
2615 2549
2196 2047
2353 1943
2045 2404
2492 2359
2169 2516
2356 1984
2344 2537
2112 2088
2309 2520
2306 1985
2556 2655
1918 2369
2282 2177
2217 2313
2189 2309
2067 2602
2606 1943
2503 2403
2376 2055
2028 1941
2290 2520
2198 2344
2229 1925
2196 2135
2201 2602
2010 2377
2172 2307
2244 2354
2549 2200
2138 2471
2175 2047
2240 2607
2194 2420
2537 2132
2556 2069
2148 2102
1932 1994
2352 2069
2075 2222
2074 2638
2111 2510
2347 2247
2593 2604
2543 1993
2630 2468
2617 2062
2240 1984
2333 2148
2602 2069
2552 2464
2278 2543
2414 2476
2309 2374
1948 1577
1980 1919
1979 2261
1959 2567
2206 2500
2492 2299
2078 2600
2122 2418
2588 2028
2625 2543
2532 2601
2508 2039
2630 2430
2132 2274
2510 136
2604 2271
2292 2052
2133 2594
2435 2346
2271 2326
2407 2139
2247 2026
2521 1971
2090 2408
2600 2276
2023 2035
2410 2045
2546 2339
2271 2532
1993 2553
2624 2115
2538 2004
2563 2218
2144 2153
2436 2111
2637 2047
2407 2200
1918 2354
2179 2021
2506 2550
2370 2356
2123 2307
2134 2053
2579 2404
2339 2073
2448 1964
2081 2224
2223 2463
2468 2309
1939 2537
2482 2218
2461 2250
2199 2594
1985 2093
2060 2095
2180 2336
2239 2512
2504 2359
2423 2309
2284 1919
2340 2408
1953 2354
2007 2468
2099 2247
2372 2264
2237 2429
2302 2629
2026 1981
2052 2250
2573 2201
2660 1973
2139 2623
2590 2083
2241 2038
2038 2052
2294 2153
2422 2313
2187 2191
1948 2289
2038 2141
2472 2282
2564 2560
2571 2116
2543 2433
2033 2526
2332 2294
2054 2174
2075 2243
2054 2652
2602 2353
2069 2579
2316 2228
2088 2556
2384 2268
2378 2027
2049 2314
2369 2563
2244 2551
2084 2056
2020 2154
2254 2174
2471 2434
2273 2054
2463 2127
2570 2049
2538 2417
2104 2500
1997 2575
2339 2324
2532 2118
2540 2162
2244 2601
1993 2356
2356 2623
2111 2325
2506 1962
2131 2045
2594 2058
2471 2102
2290 2381
2440 2231
2271 2369
1966 2020
2283 1948
2206 1941
2539 2278
1920 2598
2183 2135
2548 2439
2646 2575
2559 2464
1954 1718
2398 2491
2369 2354
2354 2423
2593 2213
2333 1959
1966 2266
2172 2460
2653 2081
2059 2559
2504 2037
2088 2469
2187 2246
2309 1962
2592 2132
2126 1949
2417 2138
2047 2318
1932 2180
2510 2026
2081 1916
2108 2638
2139 1963
2038 2372
2561 2184
1981 1947
1942 2088
2072 2603
2539 2334
2240 2142
2501 2224
2324 2055
2255 2486
2474 2628
2396 2479
2253 2329
2631 2500
2075 2390
1979 2370
2296 2017
2112 2324
1917 2179
2495 2118
2213 2615
1953 2559
2348 2654
2408 2542
1973 2009
1938 2069
2521 2347
2036 1926
2038 2189
2390 2394
2324 1943
2593 2123
2196 1948
2150 2218
2000 2647
2520 2512
2324 2654
2355 2203
2600 2005
1979 2564
2407 2354
2307 2218
2578 2165
2313 2231
2203 2068
2512 2282
1955 2138
2546 2484
1995 2061
2322 2419
1946 2549
1932 2087
1929 2586
2074 2370
2161 2072
2374 2037
1914 2006
2461 2285
2598 2420
1938 1984
2010 2419
2145 2642
2404 2354
2598 2161
2561 2624
1993 2093
2553 2630
1917 2218
2597 2417
2640 1919
2374 2506
2319 2451
2419 2344
1915 2146
2519 2582
2600 2601
2308 2095
2523 2397
2309 2542
2189 2589
2500 2115
2045 2326
2328 2151
2142 2124
2464 2083
2573 2564
2068 2385
2340 1993
2469 2188
2083 2624
2655 2485
136 2039
2433 2414
2475 2629
2010 2032
2213 2556
2631 2240
2418 1984
2363 2287
2654 2446
2250 2143
2624 1966
2372 2282
2118 2324
2211 2362
2423 2090
2121 2331
2124 2460
2370 2590
2089 2448
2274 2652
2624 2056
2247 2002
2056 2090
2131 2430
2282 2252
1939 2384
2642 2191
1938 2655
2239 2187
2069 2524
1979 2469
2386 2339
1979 2253
2064 1938
2309 1966
2495 2326
2058 2064
2352 1938
2056 2578
2071 2510
1939 2294
1914 2627
2537 2415
2103 2331
2369 1985
1916 2132
1957 2659
2073 2020
1946 2354
2649 2597
2507 2093
2060 2218
2464 2376
2408 2602
1948 2028
2646 2139
2203 2128
2216 2407
2370 2418
2170 2349
2087 2461
2111 2396
2087 2653
1918 2123
1938 2549
2039 2372
2153 1941
2611 2201
2278 2468
2340 2172
2608 2285
1975 2156
2232 2007
2331 2601
2543 2007
2542 2381
2332 2555
2199 2138
2590 2093
2190 2464
2564 2086
2330 2068
2254 2134
2553 2275
2638 2563
2478 1942
2590 1946
2485 2059
2594 2518
2593 2271
2164 2575
2020 2253
2055 2059
2504 2253
2293 2137
2330 2254
2381 2590
2122 2309
2339 2056
1986 1966
2157 2636
2020 2340
2029 2117
2112 2074
2253 2446
2086 2216
2347 2037
2135 1994
2340 2308
1946 2615
2063 2233
2117 2283
2629 1948
2136 2408
1917 2484
2282 2304
1917 2654
2150 2539
2333 2332
2114 1975
1971 2407
2521 2467
2550 1966
2039 2028
2500 2574
2511 2471
1966 2220
2233 2343
2347 1946
2404 2220
1941 2430
2561 2409
2625 2386
1985 2495
2253 2625
2081 2327
1577 2336
2033 2104
2150 2206
2053 2215
2638 2615
2199 2259
2420 2042
2549 2507
2115 2329
2374 2556
2162 2091
2542 2184
2123 2121
2240 1966
2223 2283
1941 1979
2552 2423
2464 2188
2549 2063
2607 2467
2332 2032
2409 2624
2407 2489
2088 2414
2351 2279
2381 2020
2087 2057
2410 2043
2199 1926
2605 1970
2229 2563
2075 2221
2543 2492
2304 2399
2491 2117
2279 2511
2154 2638
2319 1941
2187 2372
2192 1973
2289 2047
1954 2125
2339 2309
1921 2013
2469 2131
2460 1946
2367 1964
2323 2240
2369 2631
2309 2550
1943 2103
2173 2091
2544 2543
2031 2214
2331 1917
2285 1465
2069 2499
2549 2229
2364 2284
1935 1958
2309 2210
2170 1988
2625 2109
1932 2592
2087 2259
2430 2370
2097 2025
2040 2611
1927 1928
2495 2164
2187 2555
2285 2390
2143 2420
2430 2482
2607 2370
2567 2117
2633 2658
2125 2588
2047 2637
2033 2190
2042 2223
2218 2347
2308 2307
2583 2001
2225 2648
2329 2073
2619 2240
2118 1938
2623 2326
2108 1941
2154 2590
2451 2071
2069 2271
2226 2368
2060 1943
2280 1945
2310 2461
2172 2560
2074 2354
2415 1970
2030 2324
2340 2526
2582 2174
2123 2348
2278 2561
2213 2600
2244 2103
2137 2283
2592 2264
1577 2643
2273 2191
2604 2257
2098 2542
2623 2408
2604 2423
2602 2078
2435 1951
2154 2290
1964 2268
2302 2054
1952 2368
2111 1955
1925 2492
2078 2063
2507 2244
1932 2420
2020 2573
2593 2083
2572 2057
2267 2338
2268 2203
2390 2603
2649 2471
2646 2218
2561 2237
2509 2007
2344 2603
2616 2153
2602 2323
2206 2590
2005 2334
2347 2521
2560 2244
1980 2011
2294 1945
1938 2084
2328 1923
2319 2254
2556 2150
1960 2146
2542 2290
2120 2523
2555 2125
2471 2232
2350 2266
2623 2200
2290 2307
2418 1986
2117 2128
2110 2501
2495 2619
2465 2396
2141 2642
2302 1972
2485 2201
2490 2515
2443 1942
2267 2010
2088 2655
2271 2655
2354 2064
2061 2660
2082 2644
1938 2464
2526 2630
2340 1966
2521 2530
2145 2296
2243 2652
2343 1954
2359 2430
2338 1947
2463 2264
2617 2330
2101 2379
2078 1942
2290 2573
2590 2118
2344 2180
2344 2101
1964 2419
2206 2307
2353 2206
2624 1993
1985 2446
2061 2364
2142 2485
2526 2376
2460 2520
2284 2639
2384 2241
2218 2499
2229 1985
1926 2186
2407 2122
1938 2607
2333 2394
2022 1931
2142 2443
1966 2386
2404 2575
2074 2290
2191 2071
2604 2266
2077 2131
2566 1926
2370 2290
2485 2030
2649 2283
1577 2344
2597 2398
2065 2560
2090 2287
2283 2280
2469 2218
1943 2354
2172 1985
2174 2071
2052 2071
2141 2637
2220 2056
2414 2026
1941 2547
2542 2220
2331 2600
2390 1947
2266 2646
2363 2078
2344 2246
2149 2445
2464 2086
2615 2308
2299 2591
2240 2590
2033 2030
2153 2254
2328 2110
1971 2654
2462 1962
2275 2586
2564 2363
2060 2309
2504 2275
2463 2333
2233 2086
2484 2142
2553 1983
1935 2297
2404 2266
2150 2184
1984 2046
2081 2458
2520 2220
2047 2327
2579 2604
2373 2152
2026 2133
1983 2532
2623 2563
2600 1962
2142 2460
2060 2619
2459 2024
2253 2604
2432 2344
2047 2066
2090 2200
2348 2299
2554 2095
2657 1919
2526 2056
2485 1943
2477 2109
2378 2494
2307 1963
2343 2169
2073 2339
1943 2077
2615 2124
2467 2347
2352 2033
2093 2630
2084 1986
2104 2059
2395 1984
1957 2633
2597 2592
2414 2324
2420 1941
2165 2462
2506 2574
2372 2332
1945 2054
2201 2121
2054 2125
2578 2088
2198 2068
2289 2642
2253 2539
2239 2026
2434 2377
2054 2598
2095 2218
136 2268
2507 2118
2434 2304
1981 2537
2608 2510
2376 2409
2150 1985
2438 2394
2603 2390
2199 2315
2283 2509
2121 2229
2573 2460
2553 2638
1939 2471
2567 2377
2324 2201
2491 2643
2246 1577
2091 2260
2348 2276
2510 2054
2506 2244
2604 2093
2187 2241
2617 2075
2560 2084
2384 2042
2616 2151
2340 2418
2285 2102
2420 2653
2149 1964
2207 2622
2214 2291
2616 1577
2069 2063
2059 2578
1973 1957
2016 1919
2512 1465
2122 1943
2184 2172
2083 2553
2020 2495
2294 2068
2042 2385
2125 2111
2620 1954
1962 2190
2253 2244
2331 2552
2460 2030
1987 2510
2220 2090
2069 2462
2365 2620
1926 2345
2482 2500
2384 2032
2433 2164
2095 2212
2188 2469
2179 2278
2133 2653
2290 2630
2616 2223
1941 2046
2430 2607
2381 2078
2286 1936
2236 2335
2631 2624
2412 2424
2309 2630
2131 2112
2126 2405
2359 2088
2590 2220
2475 1577
2068 2241
2032 2294
2161 2473
2602 2188
2458 2608
2098 2323
1938 2484
2275 2356
2038 2209
2244 2352
2037 2299
2395 2103
1718 1932
2165 2240
2393 1963
2112 2083
2043 2088
2368 2132
1946 2257
2601 2560
2576 2512
2222 2652
2072 2327
2128 2117
2434 2062
2482 2112
2472 2117
2005 1917
2239 1955
2590 2521
2237 2218
2210 2200
2211 1964
2369 2407
2632 2342
2400 2413
2040 2602
2096 2518
2638 2586
2029 2313
2395 2539
2207 2513
2132 2603
2095 2655
2624 2123
2526 2040
136 2510
2630 2300
2161 2304
1979 2352
1983 2560
2202 1980
2257 2409
1983 2046
2108 2409
2611 2655
2180 2516
2122 1986
2560 2063
1970 2163
2133 1945
1966 2553
2352 1997
2433 2109
2102 2028
2088 2654
2498 136
2184 2266
1916 2616
2551 1941
2052 2616
2462 2299
2352 2154
2606 2131
2199 2479
2623 2607
2043 2190
1940 2472
2546 2201
2368 2180
2508 2068
2189 2526
2359 2124
2212 2600
2091 2130
2611 2123
2148 2571
2611 2147
2223 2509
2086 2646
2218 2095
2640 2447
2233 2520
2655 2266
2638 2190
2573 2482
2054 2102
2222 1947
2446 2139
2598 1954
2626 2004
2244 2200
2220 2287
1946 2122
2078 2275
2392 2476
2473 2597
2429 2507
2266 2122
2035 2231
2258 2142
2616 2054
2226 2557
2352 1918
1959 2292
2372 2148
2010 2475
2030 2462
2506 2213
1989 2625
2602 2386
2347 2206
2504 2056
2566 2523
2586 2554
1948 2081
2038 1948
2458 2138
2352 2323
2033 2309
2240 2370
1983 1946
2059 1986
2160 2156
2504 1966
2060 2084
2625 2278
1718 2149
2564 2212
2145 2366
2290 2030
1985 2354
2498 2048
1465 2629
2061 2025
2308 2278
2122 2386
2492 2654
2166 2405
2642 2250
2089 2231
2510 2491
2086 2142
2547 2555
2530 2148
1962 2112
2068 2294
2140 2542
2460 2507
2030 2600
2460 2485
2610 2406
2228 2361
2220 2073
2386 2150
2582 2649
2594 2161
2323 2109
2189 2038
2543 2436
2398 2026
2639 2364
2045 2020
2266 2288
2516 2519
2302 2268
2542 2564
2340 2309
2543 2519
2174 2289
2115 2323
2506 2631
2157 2001
1972 2006
2047 2191
2123 2433
2394 2032
2625 2309
2059 2464
2343 2491
2137 2148
2243 2222
2338 2508
2059 2467
2042 1964
2279 2224
2464 2090
2200 2623
2376 2550
1986 2326
2552 2615
2563 2030
2063 2093
2409 2467
2404 2554
2211 2066
2368 2289
2554 2123
2433 2220
2191 2054
2370 2492
2374 2083
2484 2037
2378 2640
2361 2402
2516 2101
2259 2007
1945 2232
2284 2006
2278 2395
2425 2076
1955 2087
2395 2386
136 2498
2043 1953
2560 2539
2352 2625
2347 2187
2631 2069
2539 1938
2553 2507
2567 2332
2590 2593
2619 2561
1990 2049
2594 2232
2395 2551
2247 2302
2062 2081
2078 2005
2278 2428
1979 2392
1943 2190
2359 2376
2520 2446
2229 2040
2435 1980
1926 2138
1964 2610
2482 2229
2196 2273
2638 2276
2268 2232
2509 2451
2606 2064
2620 2364
2282 2510
1959 2174
2154 2414
2394 2396
2498 2151
2136 2646
1953 1983
2650 2076
2144 2241
2549 2237
2340 2077
2582 2588
2164 2381
1944 2318
2244 1941
2118 2504
2658 2011
2485 2131
2509 2135
2426 1988
2240 2165
1973 2660
2350 2615
2414 1938
2136 1979
2395 2244
2122 2352
2385 2208
2036 2610
2546 2579
2332 1941
2198 2149
2248 2047
2053 2597
2351 2343
2406 2038
2567 2629
2532 2218
2550 2561
2401 2170
2374 2150
2045 2216
1941 2643
2494 2435
2445 2508
2618 2448
2074 2172
2122 2043
2482 2478
2309 2058
2244 2550
2274 2199
2485 2276
2546 2212
2139 2482
2139 1918
2155 2475
2088 2526
2103 2290
1920 2148
2334 2467
2184 2429
2300 2549
2160 2360
2064 2354
2247 2399
2647 1991
2224 2135
2590 2078
2324 2261
2154 2165
2115 2326
2027 2202
2072 2598
2188 2560
1945 2133
2306 2526
2000 1927
1966 2655
2007 2333
2592 2169
2313 2080
136 2660
2460 2290
2468 2354
2253 2233
2411 2373
2338 2148
2090 1929
2172 2266
2073 2563
1983 2290
2042 2649
2036 2566
2543 2142
2093 2359
2309 2073
2148 1920
2154 2655
2176 2071
2271 1966
2404 2033
2118 2165
2031 2174
2044 1942
2593 2625
2134 2336
2294 2282
2607 1966
1941 2510
2420 2509
1954 2659
2574 2615
2029 2509
2407 2600
2180 2203
2410 1917
1971 2190
2063 2354
2030 2244
2471 2176
2586 2326
2049 2248
2504 2550
2381 2005
2304 1926
2508 2072
2475 2582
1964 2406
2465 2117
2275 2115
1465 2169
2340 2374
2551 2607
2261 2233
2112 2499
2629 2608
2428 2526
2559 2055
2143 2451
2458 2183
2337 2116
2247 2294
2043 2074
2543 2149
2591 2324
1943 2045
2631 2109
2101 2390
2267 1465
2602 2030
2549 2290
2393 2007
2045 2131
2506 2575
1929 2266
2495 2074
2604 2179
2218 2308
2183 2385
2072 1981
1718 2616
2276 2526
2210 2464
1918 2536
2339 2212
2392 2233
2327 2127
2125 2603
2260 2236
1997 2607
2326 2623
2223 2151
2654 2423
2088 2334
2064 2093
2240 2078
2448 2228
2283 2327
2280 2394
2420 2183
2550 2323
2131 2575
2353 2504
2324 2573
2492 2210
2438 2543
2184 2646
2142 2188
2162 2341
1989 2356
2187 2589
1971 2536
2278 2575
2237 2489
2339 2147
2112 2340
2354 2507
2056 2086
2183 2420
2409 2131
2564 2109
2333 2512
2176 2273
2308 2347
2615 2122
2115 2229
2020 2590
2246 2438
2325 2177
2135 2544
2280 2327
2122 2556
2286 1965
2149 2224
2185 1718
2477 2216
2389 1913
1955 2594
2305 2385
2354 2299
2053 2199
2655 2449
2349 1982
2434 1945
2384 1939
2465 1577
1926 2133
1946 2136
2125 2333
2171 2202
2584 2056
1939 2518
1929 1984
2060 2139
1984 2374
2117 2242
2347 2043
2220 1943
2005 2098
2235 2608
2653 2465
2653 2072
2020 2271
2546 2507
2133 2153
2190 1989
2462 2601
2467 2064
2254 2133
2551 2164
2547 136
2240 2237
2387 1983
136 2635
2226 2379
2561 2386
2647 2648
2261 1971
2188 2526
2306 2253
2250 2198
2054 2603
2244 2604
2304 2176
1920 2629
2232 2491
2142 2423
2133 2451
2478 2056
2176 2294
1920 2183
2588 2239
2275 2542
2172 2275
2473 2232
2327 2333
1997 1979
1984 2233
2352 2464
2192 2538
2623 2460
2247 2180
2224 2589
2629 2599
2611 2559
2069 2093
2244 2363
1920 2328
2572 2305
2115 1946
2154 2103
2190 2409
1920 1940
2334 2625
2333 2616
2264 1954
2543 2623
2392 2278
2229 2476
1929 2118
2553 2469
2390 2468
2607 2088
2047 2598
2619 2213
2386 2184
2260 2173
2588 2512
2301 2094
2090 2257
2240 1917
2087 1945
2010 1920
2082 2412
2289 2153
2189 2279
2655 2560
2040 2056
2201 2261
2485 2104
2429 2586
2479 1939
2245 2535
2257 2073
1962 2331
2128 1577
1979 2477
1917 2602
2646 1985
2329 2560
2467 2142
2602 2484
2586 2073
1965 2049
2202 1951
2329 2194
2072 2125
2639 2494
2084 2164
2478 2092
2144 2254
2508 2087
2515 2207
2309 2290
2061 1991
2142 2393
2237 2115
2233 2611
2215 2385
2630 2381
2047 2372
2510 2047
2444 2426
1947 2377
2132 2111
2553 2556
2043 2542
2539 2257
2103 2271
1941 2324
2423 2550
2066 1964
2053 1985
2104 2229
2604 2104
2355 2529
2624 2306
2103 2244
1940 2589
2206 2103
2128 2143
2414 1917
2498 1954
2352 2118
2643 2315
2507 2553
2037 2115
2299 1966
2047 2336
2124 2469
2620 2365
2071 2338
2118 2290
2045 2299
2103 2131
2404 2147
2031 2176
2142 2108
2389 1970
2247 2413
2494 2647
2451 2161
2104 2654
2433 1946
1972 2027
2140 1979
1936 2403
2363 2184
2369 1984
2460 2271
2590 2600
2408 2040
2198 2511
2485 2165
2460 2212
2492 2201
2180 2143
2275 2095
1993 2404
2608 1465
2045 2121
1987 2278
2003 2235
2275 2307
2385 2053
1938 2123
2053 2438
2047 2232
1920 2472
2603 2333
2022 2016
2471 2302
2507 2619
2501 2243
2471 2279
2188 2395
2526 2347
2433 2253
2625 2093
2107 2644
2142 2552
2140 2190
2642 2272
2282 2053
2122 1993
2324 2093
2088 2542
2602 2309
2078 2370
1945 2135
2406 2186
2550 2468
2221 1916
2257 1997
2372 2567
2138 2151
2290 2150
1948 1945
2324 2112
2139 2469
2153 2594
2064 2556
2327 2652
2600 2179
2598 2187
2133 2294
2198 2102
2562 2448
1718 2169
2343 2461
2199 2465
1940 2419
2334 2118
1991 2657
1920 2509
2215 2111
2555 2465
1971 2043
1984 2468
2410 2212
2556 2339
1980 1931
1918 2084
2418 2492
2112 2383
2585 2657
2128 2598
2491 1465
2629 2148
2200 2638
2333 2315
2223 2347
2338 2102
2460 2559
1959 1970
1979 2353
2604 2552
2054 2072
2216 2118
2279 2052
2521 2560
2482 2216
2624 2611
2564 1938
1995 1928
2108 2329
2308 2363
2266 2271
2233 2370
2386 2356
2005 2468
2133 2180
2600 2201
136 2001
2374 2218
2657 1973
2319 2054
2374 1979
2593 1979
2582 2533
2250 2087
2216 2602
2082 2228
2416 2209
2649 2032
2564 1997
2299 2307
2653 2039
2180 2328
2526 2233
2136 2064
2057 2081
2212 2542
2257 2237
2461 2032
2547 2026
2414 2573
2522 2451
2638 2084
2054 2445
2492 2354
2597 2062
2220 1979
2485 2261
1979 2539
2289 2260
2116 2648
2629 1941
2069 2074
2551 2460
2551 2638
2473 2649
2550 2045
1971 2233
2415 2072
2095 2591
1962 2240
2611 2069
2097 2585
2617 2068
1941 2052
2477 2220
2625 2233
2602 1983
2233 2347
2640 1968
2247 2362
1995 1999
2297 2640
2122 2477
2434 2183
2516 2338
2026 2289
2131 2095
2081 2372
2108 2467
2298 2543
2344 1970
2083 2088
2593 2591
1993 2348
2339 2370
1958 2050
2575 1946
1951 2202
2077 2037
2069 2103
2172 2184
1926 2366
2103 2115
2417 1940
1917 2093
1941 2144
2069 1983
1927 1914
2381 2216
2336 2294
2088 2553
2173 2411
2582 2555
2329 2090
2121 2573
2074 2083
2451 2522
2601 2526
2395 2520
2102 2194
2495 2083
2549 2043
2033 1993
2313 2119
2324 2063
2109 2139
2543 2223
2556 2121
2607 2278
2155 2642
2462 2395
2123 1985
1966 2340
2212 2324
2020 2218
2347 2188
1985 2131
1972 2645
2237 2131
2054 2315
2030 2575
2588 2616
2625 2329
2262 2576
2304 2512
2434 2110
2299 2546
2574 2329
2423 1984
2616 2241
2484 2485
1972 2011
2471 2169
2458 2434
1983 2212
2237 2352
2053 2134
2241 2127
2131 2122
2462 2172
2344 2222
2499 2430
2149 2057
2617 2280
2551 2485
1986 2045
2410 2206
1932 2445
2365 2657
2606 2229
2428 2244
2451 2241
2475 2047
2560 2065
2551 2631
2369 2409
2511 2649
2279 2293
2376 2546
2309 2033
2261 2063
2043 2564
1917 2359
2319 2125
1946 1929
2064 2575
2409 2326
2559 2213
1946 2552
2240 2446
2053 2510
2271 2164
2339 2449
2203 2510
2355 2250
2202 2658
2059 2573
2198 2125
2340 2059
2394 2345
2502 2125
2448 2371
2229 2623
2088 2374
2069 2536
2546 2654
2409 2600
2356 2266
2299 2104
2434 2153
2347 2283
2326 2150
2060 2506
2206 1993
2506 2462
2593 2631
2326 2140
2604 2623
2072 1945
2464 2131
2614 2080
2243 2511
2363 2275
2507 2446
2383 2092
2537 2649
2446 2600
2419 2127
2240 2324
2061 2627
2315 2567
2482 2462
2377 1916
1983 2363
2531 2233
2229 2606
2020 2331
2174 2594
2423 2059
2246 2187
1954 1921
2446 2468
2409 2482
1986 2520
2111 2268
2165 2109
1953 2409
2467 2546
2007 2241
2095 2139
2087 2498
2091 2411
1577 2458
2036 2288
2561 2020
2040 2213
2271 2069
2598 2180
2068 1959
2261 2266
2370 2276
2498 2203
2161 2280
2078 2430
2108 2482
2586 2122
2550 2625
2124 1993
2619 2201
2511 2436
2627 2025
2567 2196
2347 2028
1916 2399
2006 1927
2399 2128
2305 2087
2285 2588
1916 2471
2392 2495
2059 2423
2410 2123
2212 2083
2433 2607
2356 2020
2205 2031
2369 2326
2542 2392
2591 2600
2095 2118
2150 2308
2336 2028
2348 2172
2284 2011
2506 2290
1917 2074
2149 2226
2619 2492
2164 2638
2312 2389
1718 2343
2520 2363
2234 2311
2290 2539
2288 2345
2300 2370
2554 2059
2537 1959
2601 2121
2386 2575
2104 2611
2133 2543
2309 2575
2285 2511
2620 2225
2059 2611
2192 2447
2235 1981
2077 2354
2374 2543
1917 2414
2187 2153
2233 2353
2088 2604
2611 2275
2616 2125
2074 2059
2573 2112
2007 2461
2243 1970
2240 2546
2637 2176
2276 2611
2286 2371
2212 2520
2598 2183
2078 2469
2387 2300
1983 2551
2059 2201
2211 2419
2087 2516
2430 2376
2395 2506
2593 2326
2417 2473
2202 2346
1920 2471
2142 2212
2111 2327
2408 2611
2240 2374
2074 2542
2153 2002
2552 2123
2433 2495
2430 2309
2367 2325
2264 2547
2391 2190
2138 1465
2607 2556
1918 2593
2194 2081
2033 2290
2643 2629
2299 2507
2589 2138
2153 2396
2384 2137
2633 1995
2059 2033
2210 2404
2074 2201
1946 2083
2278 2573
1994 2372
2629 2294
2054 2111
2194 2325
2323 2271
2536 2164
2267 2174
2397 2644
2376 1925
2052 2336
2137 2143
2127 2491
2250 2436
2031 2480
2275 2109
2201 2408
2636 2626
2377 1948
2103 2352
2355 2543
2153 2187
2244 2021
2486 2515
2292 2609
2339 2030
2509 2603
2242 2133
2005 2423
2088 2559
2067 2476
2111 2052
1916 2282
2224 2649
2498 2425
2176 2187
2398 2071
2387 2454
2081 2279
2033 2098
2121 2060
2278 2624
1917 2381
2081 2032
2088 2309
2047 2174
2374 2606
2642 2194
2081 2111
2098 2339
2344 2642
2141 1944
2184 2613
2506 2137
2243 2264
1976 2001
2020 2500
2059 2043
2218 2150
2327 2438
2187 2002
2244 2334
2251 2618
2489 2430
1984 2520
2083 2300
2030 2229
2625 2369
2134 2533
2447 136
2414 2477
2550 2030
2135 2475
1918 2309
1986 2136
2507 2112
2583 2157
2333 2511
2104 1929
2146 2341
2499 1983
2399 2582
2264 2101
2077 2201
2521 2590
2184 1979
2222 2075
2271 2213
1943 2564
2526 2602
2589 1926
2047 2072
2574 2083
2646 2073
2418 2121
2578 2600
2221 2243
2292 2417
2124 2108
2250 2368
2418 2077
2500 2200
1956 2245
2552 2275
2611 2500
2055 2414
2352 2586
1963 1971
2325 2038
1923 2498
2539 2485
2526 2464
2059 2244
2647 2633
1940 2327
2117 2368
2518 2509
2471 1718
2030 2299
2224 2148
1577 2191
2117 2273
2642 2239
2377 2498
2200 2560
2553 2340
2551 2324
1918 2154
1948 1947
2500 2188
2384 2047
2344 2637
2058 1941
1577 2149
2597 2420
2325 1926
2640 2417
2264 2132
2446 2136
2081 2501
2206 2326
2504 1946
2637 1923
1959 2102
2476 2392
2057 2254
2499 2560
2046 2625
2642 2509
2124 2165
2384 2169
2407 2593
2325 2029
2399 2002
1993 2552
2121 2410
1918 1917
2406 2318
2549 1993
2095 2005
2408 2331
2319 2512
2213 2492
2352 1983
2506 2060
2600 2542
2542 2334
2253 2123
2201 2624
2104 1985
2507 2108
2037 2086
2266 2507
2543 2586
2428 2611
2361 2126
2636 2061
2045 2619
2083 2200
2592 2268
2615 2348
2068 2111
1966 2118
2276 2257
2292 2420
2574 2140
2294 1948
2154 2354
2309 2154
2504 2604
2053 2161
2461 1916
2248 2397
2278 1979
2347 2370
2123 2326
2328 2054
1986 2574
2510 2547
2428 2586
2028 2143
2612 1964
2074 2607
1938 2109
2190 2395
2028 2071
2654 2348
2376 2287
2313 2448
2210 1986
2002 2183
2123 1917
2108 2607
2172 2206
2559 2543
2115 2334
2451 2438
2410 1929
2310 2416
2200 2478
1983 2121
2593 2300
2056 1985
1979 2074
2478 2340
2639 2225
2430 2108
2282 2241
2323 2115
2414 2433
2600 1993
2137 2533
2477 2154
1985 1917
2344 2479
2302 2285
2040 2131
2297 2494
2507 2056
2345 2214
2624 2460
2472 2639
2077 2492
2379 2259
2172 1966
2088 2083
2582 2128
2254 2616
2110 2652
2165 2188
2468 2154
2196 1954
2136 2564
2081 2196
2007 2148
2072 2127
2218 2395
2509 2432
2560 2258
2069 1917
2196 2588
2532 2624
2087 2617
2418 2646
2083 2271
2615 2083
2461 2567
2189 2241
2507 2266
2319 2653
2564 2546
2234 2092
2394 2053
2408 2477
2293 2040
2334 2086
2047 1944
2386 2464
2501 2062
2356 2353
2480 2362
2282 2319
2233 2115
2611 2460
2325 2473
2244 2046
2005 2556
2098 2347
2649 2127
2220 2485
2354 1953
2183 2128
2370 2408
1993 2485
2118 2140
2142 2348
2170 2426
1465 2347
2659 1960
2332 2384
1994 2007
2477 2179
2116 1914
1982 2513
2542 2574
2413 2312
2593 2118
2655 2575
2607 2484
2658 1954
2127 2102
2180 1465
1980 1957
2546 1993
2386 2600
2542 1997
2290 2600
2601 1941
1981 2071
2617 2189
2246 2434
2369 2468
2068 2347
2549 1962
2477 2266
2093 2521
1926 2247
1998 1980
2104 2118
2526 2311
2026 2125
2164 1993
2328 2384
2201 2299
2223 2394
2059 2064
1920 2235
2384 1955
2128 2646
1938 2550
2395 2074
2007 2347
2043 1984
2240 2334
2331 1985
2029 2062
2344 2461
2093 2240
2630 2184
2491 2161
2069 2464
1718 2344
2257 2118
2199 1948
2142 2387
2352 2240
2069 2551
2220 2550
2574 2352
563 1967
2111 2125
2590 2165
2218 2586
2127 2199
2463 1948
1465 2153
2345 2367
2250 2463
2172 2485
2215 1987
2543 2293
2059 2055
1953 2468
2203 1959
2209 2155
2480 2425
2374 2356
2561 2549
2430 2073
2214 1974
2198 2502
2064 2340
2454 2058
2588 2649
2154 2122
2468 2098
2613 2331
2240 1979
1923 2226
2275 2430
2088 2520
2244 2418
2573 2578
2131 2446
1943 2370
2460 2590
2407 2190
1943 2326
2396 2377
2395 2485
2086 2359
2139 2340
2428 2383
2392 2043
2404 2046
2538 2620
2574 2467
2187 1945
2347 2593
2593 2142
1971 2261
2489 2646
2564 2392
2153 2133
2384 2461
2128 2047
2609 2199
2068 2102
2278 2326
2627 2660
2655 2521
2290 2229
2186 1964
2223 2007
2641 2355
2257 2410
2058 2229
2165 2073
2246 2128
1970 2222
2630 2095
2464 2212
2267 2351
2006 2658
2062 2222
2408 2423
2206 2063
2004 1950
2619 2172
2026 2508
2510 1577
2653 2153
1943 2275
1927 2024
2381 2423
2206 2549
2077 2005
2423 2112
2485 2188
2363 2410
2551 2578
2532 1993
2247 2028
2336 2319
2611 2427
2071 2491
2397 2035
2179 2300
2267 2102
1947 2273
2030 2430
2492 2414
2176 2588
1994 2199
2579 2611
2183 2434
2418 2553
2349 2622
2229 1946
2451 2510
2266 2573
2304 2032
2037 1984
2273 2264
2223 2127
2649 2498
2458 2543
2543 2446
2088 1966
2040 2604
2213 2229
2543 2045
2395 2200
1986 1962
2291 2406
2591 2574
2043 2563
2379 1941
2290 2216
2602 2469
1995 2050
2295 2629
2120 2587
2623 1941
2216 2059
2123 2499
2220 2363
2026 2436
2045 2348
2118 2257
2174 1916
2058 2482
2206 2370
2083 2290
1959 2652
2090 2046
2511 2132
2060 2560
2073 2370
1925 2056
2302 1969
2005 2244
2413 2531
2616 1718
2192 1972
2340 2619
2359 2539
2446 2348
2303 2118
2369 2559
2111 1718
1966 2500
2475 2010
2436 2347
2077 2546
2586 2543
2283 2502
2394 2473
2643 2649
2020 2564
2508 2254
2030 2376
2019 2526
2602 2526
2604 2575
2630 2090
1970 2384
2220 2190
2035 1960
2643 1945
1970 2110
2133 2032
2390 2537
2604 2526
1966 2604
2033 2521
2068 1955
2038 2283
2542 2108
2623 2602
1945 2516
2631 2630
2533 2053
1993 2131
2482 2300
2172 2115
2323 2347
2169 2134
2224 2246
2376 2323
2530 2081
1991 1976
1931 2001
2014 1980
2254 2512
2190 2433
2495 2554
2058 2142
2567 2241
1465 2643
2118 2549
2150 2098
1966 2433
1935 2159
2602 2290
2155 2247
2241 2191
2396 2101
2434 2396
2611 2539
2625 1966
2133 2010
2555 2582
2131 2556
2408 2043
2489 2093
1932 1577
2595 2483
2190 2115
2485 2073
2477 2340
2497 2193
2619 2347
2090 2300
2254 2117
2212 2233
2002 2351
1966 2154
2615 2108
2003 2054
2546 2142
2307 2329
2289 2048
1465 2508
2123 2299
2139 2460
2543 2224
2014 2648
2276 2500
2302 2038
2115 2307
2224 2458
2032 1954
2347 2460
2326 1943
2607 2150
2078 2237
2633 1931
2002 2273
2032 2599
2127 2279
2396 2211
2550 2118
2542 2578
2473 2384
2143 2052
1989 2553
2495 1997
2123 2086
2428 2550
2007 2623
2410 2564
2074 2108
2086 2418
2183 2039
1985 2530
2486 2349
2400 2616
1917 2040
2072 2436
2478 2646
2108 2240
1959 2283
2377 2588
2564 2077
2302 2208
2540 2314
2240 2428
2115 2150
2241 2333
2125 2028
2555 2026
2630 2213
2327 2592
136 1926
1962 2109
2302 2149
2280 2434
2109 2278
2294 2280
2404 2624
2623 2212
2102 2289
2093 2045
2077 1989
1993 2578
2363 2489
2115 2064
2428 2064
2169 2582
1957 2097
2072 2189
2300 2561
2340 1962
2187 2567
2340 2257
2024 2648
2279 2533
2543 2575
2436 2081
2363 1997
2148 2289
2339 2576
2452 2325
2658 1927
2163 2582
1986 2271
1917 2615
2501 2069
1985 2123
2369 2404
2095 2654
2408 2543
2040 2607
2329 2278
2499 1986
2524 1985
2560 2433
2542 2549
1984 2574
2561 1917
2284 2018
2043 2607
2137 2062
1966 2602
2201 1943
2020 2506
2183 2038
2478 2560
2229 2059
2005 2482
1718 2180
2061 2538
2032 2143
2290 2124
2471 2268
1920 2592
2313 2540
2193 2080
2072 2501
1946 2602
2543 2607
2020 1966
2348 1941
2054 2294
2611 2392
2111 1954
1992 2444
2165 2602
2266 2131
2535 2094
2631 1989
2460 2073
2073 1918
2046 2468
2181 2656
2131 2586
2325 2480
2063 2118
2486 2401
2208 2385
2328 2332
2374 2554
2392 2564
2289 2448
2140 2619
2630 2308
2308 2559
2231 2047
2224 1954
2216 2504
2071 2293
2417 2279
2434 2007
2646 2074
2059 2300
2471 2398
2253 2237
2345 2288
2590 2329
1943 2631
2138 2031
2579 2266
2376 2464
2348 2619
2347 2427
2506 2423
2088 1993
2084 2624
2526 2339
2229 2123
2267 2187
2007 2560
2340 2078
2069 2655
2630 2556
2119 2618
2104 2376
2022 1973
2348 2624
2268 2027
1948 2194
2395 2323
2509 2588
2037 2165
2043 1925
2068 2132
1941 2188
2364 1951
2128 1947
2194 2047
2624 2495
2240 2549
2283 2468
2506 1979
2172 2123
2306 2564
2056 2218
2473 2205
2602 2271
2468 1986
2380 2448
2553 2073
2054 2399
2369 2469
1980 2659
2576 2136
2526 1971
2351 2102
2543 2394
2117 2475
2376 2261
2109 2578
1941 1959
2387 2619
2418 2299
2309 2495
2176 2557
2543 2468
2179 2037
1985 2121
2309 2020
1938 2500
2302 2420
2586 2395
2616 2134
2240 1929
2285 2372
2580 2047
2268 2616
2573 2543
2419 2525
2616 2052
2600 2460
1984 2123
2151 2032
2125 2007
2323 2363
2076 2466
2642 2039
2532 2142
1941 2081
1938 2290
1928 2447
1718 2144
2323 2078
2229 1938
2555 1945
1941 2465
2279 2223
2033 2374
2155 2525
2077 2638
2540 2480
2581 2047
1577 2282
2211 2396
2658 2633
2376 2040
1925 2299
2542 2287
2007 2458
2040 2408
2083 2352
2069 2521
2103 2469
1577 2629
2307 2108
2290 2104
2564 2103
2039 1945
2430 2586
2096 2132
2203 2289
2086 2611
1577 2183
2432 2394
2037 2500
1979 2331
2623 2308
2489 2492
1951 2006
2443 2490
2338 2028
2625 2414
2413 2102
2348 2244
2603 2289
2300 2339
2438 2344
2389 2529
2030 2499
2414 2468
2461 2101
2109 2630
2563 2339
2201 2428
2123 2386
2461 2434
2059 2526
2646 2033
2622 2170
2118 2233
2384 2377
2224 2250
2081 2273
2093 2590
2201 2404
2229 2482
2608 2137
2104 2356
2564 2142
2045 2139
1465 2315
2011 2000
2127 2312
2123 1984
1951 1972
2410 2550
2191 2042
2582 2461
2372 2338
2077 2464
2020 2104
2368 2169
1952 2221
2450 2632
2585 1995
2054 2071
2151 2351
2556 2220
2347 2338
2447 2009
2191 2328
2384 2223
2420 2137
2153 1718
2308 2104
2369 2601
2271 2064
2652 2199
2327 2038
2540 1944
2064 2213
2045 2407
1980 1921
2509 2544
2139 2410
2360 1933
1944 2176
2020 2172
2169 1987
2634 2540
2209 2419
2083 2093
2218 2329
2325 1959
2322 2235
2326 2306
2104 2086
2449 2429
2409 1993
2478 2086
2495 2077
2484 2414
2537 2110
2356 2140
2507 2407
2369 2098
2275 2395
1935 1973
2617 1718
2617 2026
2623 2348
2089 2361
2398 2543
2072 2463
2526 2564
2032 2635
2504 2526
2104 2623
2124 2370
1939 2246
2323 2430
2007 2268
1465 2068
2086 2218
2468 2199
2499 2464
2593 2414
2266 2574
2136 2229
2206 2624
1926 2169
2056 2331
2154 2112
2482 2464
1964 2488
2117 1959
2297 1972
2328 2289
1979 2363
1917 2467
2074 2323
2324 2037
2054 1945
2118 2088
2576 2404
2620 1957
1930 2035
2309 2088
2391 2275
2215 2239
2204 2421
2218 2543
2443 2622
1968 2143
2239 2458
2477 2423
2052 2509
2564 2433
2571 2508
2248 2534
2058 2611
2532 2220
2077 2600
1943 2410
2625 2526
1971 2323
2072 2420
2374 2484
2046 2043
2039 2385
2189 2330
2363 2329
2600 2430
2403 2107
2138 2491
2020 1993
2616 2292
2594 2510
2543 2295
2030 2005
2578 2124
2196 2582
1917 2546
2043 1986
2600 2500
2032 2042
2588 2328
2180 2199
2484 2604
2546 1946
2087 2133
2611 2200
2430 2624
2374 2492
1991 2027
1966 2348
2428 1946
2433 1962
2615 2184
2237 2074
2282 1945
2495 2477
1986 2131
2468 1941
2026 2414
1951 136
2276 2108
2339 2391
2510 2419
2299 2553
2398 2068
2169 2512
2018 1968
1926 2463
2174 2267
2142 2607
2543 2298
2608 2087
2395 2625
2313 2197
2134 2087
2654 2655
2210 2133
2157 136
1986 2200
2302 1932
2086 2257
2507 2539
2551 1993
2153 2028
2116 2202
2363 2369
2116 2001
2533 2544
2202 2225
2484 2654
2347 2042
2213 2353
2652 2333
2056 2299
1926 2081
1925 2376
2033 2095
1979 2414
2292 2224
2630 2446
2275 2005
1942 2499
2029 2002
2593 1966
2294 2399
2365 2004
2654 2546
2111 2368
2498 2169
2404 2392
2485 2363
2133 2254
1465 2279
2253 2352
2071 2028
2124 2363
1957 1973
2418 2489
2432 2110
2567 2246
2552 2591
2492 2043
2454 2142
1938 2188
2630 2374
2279 2125
1979 2121
2030 2253
2059 2408
2206 2290
1925 2573
2510 2132
2037 2546
2652 2111
1918 2546
2468 2526
2172 2507
2045 2124
2578 2271
2134 2102
2356 2593
2484 2059
2381 2179
2615 2084
2359 2356
2573 1993
2223 2592
2328 2555
2276 2331
2220 2347
2068 2653
2102 2132
2519 1916
2153 2283
2438 2592
2464 2112
2381 1971
2438 2194
1959 2101
2348 2409
2407 2095
2502 2224
2638 2131
2359 2309
2461 2328
2395 2464
2098 2266
2200 2414
2180 1718
2517 2133
2468 2108
2546 2383
2084 2098
2056 1986
2276 1941
1971 2564
2058 2044
2142 2190
2491 2419
1960 2120
2638 2244
2200 2600
2410 2578
2093 2370
2088 2165
2339 1986
2020 2140
2602 2139
2391 1962
1954 1940
2469 2190
2659 2022
2190 2354
2518 2241
1984 1943
2461 2463
2121 2482
2539 2104
2376 2220
2546 1918
2271 2210
2363 2386
2555 2143
2429 2229
2093 2606
2059 2386
2046 2078
2477 1986
2631 2112
2299 2213
2047 2203
2598 2510
2188 2244
2371 2231
2131 2630
2328 2292
2550 2507
2477 2369
2475 2377
2139 2646
1940 1948
2556 2550
2520 2539
2540 2272
2378 2050
2240 2059
2115 2055
2266 2083
2005 2602
2104 2489
2192 2435
2561 2593
2630 2579
2655 1984
2351 2372
1993 2172
2067 2037
2274 2062
2521 2376
2410 2257
2003 2304
2464 2563
1985 2352
2354 2482
2627 2006
2611 2630
2631 2410
2564 2124
2601 2630
2121 2326
2047 2345
2414 2188
2554 2504
2289 2319
2199 2196
1979 2615
2376 2229
2434 2603
2103 2086
2118 2331
2275 2631
2529 2250
2617 1939
2347 2556
2279 2330
1940 2143
1926 2254
2154 2429
2369 2339
2313 2342
2085 2211
2085 2610
2081 2555
2610 2345
2347 2539
1938 2142
2266 2499
2087 2194
2394 2003
2241 2419
2384 2198
2328 2075
2224 2445
2046 2064
2511 2180
2151 2246
2418 2309
2053 2302
2556 2601
2093 2383
2028 2279
2103 2324
2410 2574
2224 2547
1951 2061
2180 2174
2327 2102
2598 2302
2136 2489
2190 2359
2496 2135
2412 2577
2121 2188
2463 2589
2292 2293
2526 2506
2602 2543
2215 2333
1947 2537
2282 2547
2520 2352
2594 2137
2593 2423
2478 2090
2056 2206
2509 2377
1922 2160
2579 2543
2511 2183
2526 1983
2567 2128
1465 2187
2098 2507
2425 2480
2150 2654
1991 1998
2347 2387
2378 2202
2430 2103
2005 2324
2065 1465
2039 2461
2336 1955
2142 2020
1929 2200
2582 1916
2247 2496
2043 2147
1945 2254
2472 2001
2290 2564
2020 2206
2364 2018
2081 2511
2370 2063
2482 2063
2069 2045
1929 1938
2554 2560
2647 1995
2506 2374
2073 2233
2374 1983
2381 2348
2266 1917
1995 2012
2543 2239
2036 2366
2059 1983
2524 2165
2418 2088
2284 2027
2508 2199
2394 2199
2209 2296
1913 2616
2150 2046
2306 2093
2103 2607
2630 2542
1972 2268
2007 2629
2654 2500
2354 2550
2409 2352
2374 2108
2414 2122
2371 2049
2218 2590
2495 2381
2342 2618
2039 2052
2187 2377
2103 2139
2473 2161
2019 1942
2033 2467
1955 2174
1946 2507
2642 2169
2372 2333
2282 2533
2307 2244
2419 1987
2339 2334
2054 2163
2074 2560
2549 2218
2292 2183
2183 2144
2384 2643
2343 2125
2543 2511
2433 1929
2588 1945
2504 2602
2601 2115
2478 2258
2140 2363
1577 2471
2266 2591
2590 2564
2102 2305
1964 2138
2649 2327
2191 2451
2055 1953
2525 2270
2142 2060
2567 2133
2276 2546
2283 2241
2449 1938
2324 2646
2162 1964
2647 2097
2354 1938
2090 2348
2276 2386
2229 2414
2391 2383
2498 2068
2348 2218
2184 2069
1935 2620
2504 2165
2188 2056
1921 2022
2086 2482
2290 2484
1987 2199
2489 2040
2180 2279
2436 2189
2374 2477
2224 2026
2423 2210
2658 2006
2648 2018
2567 2597
1971 2112
2138 2241
1921 2627
2406 2345
2592 2071
2329 2559
2334 2064
2095 2059
1718 2292
2149 2533
1941 1955
1980 1950
1995 136
2165 2276
2110 2062
2179 2356
1939 2332
2264 2053
2068 1939
1941 2526
2410 2542
1948 1932
2648 2097
2206 2495
2196 2325
2592 2047
2619 2266
2104 2606
2578 2590
2290 2058
2395 2033
2352 2578
2273 2384
2489 2078
2179 2059
2258 2172
2221 2003
2603 2292
2307 2033
2069 2611
2165 2615
2201 2237
2494 2658
2151 1954
2496 2338
1984 2118
1941 2148
2047 2608
2009 2447
2331 2140
1985 2122
2363 2229
2271 2098
2555 2042
2275 2506
2038 2032
2409 2638
2045 1966
2086 2233
2083 2278
2576 2300
2073 2430
2387 2189
1923 2031
2617 2547
2088 1946
1979 1997
2201 2579
2212 2172
1989 1983
2093 2520
2148 2338
2629 2128
2246 1916
2267 2653
2421 2634
2503 2314
2350 2056
1916 2246
2611 2586
2111 2161
1964 2612
2620 1958
2145 1923
2284 1991
1979 1938
2345 2366
2221 2110
2471 2617
2223 2081
2315 2283
2126 2152
2520 2469
2239 2336
2643 2642
2655 1997
2064 2300
2057 1959
2406 2211
2492 2213
2194 1945
1982 2280
2201 2206
1948 2068
2259 1926
2216 2324
2378 1998
2340 2578
2081 2463
2377 2138
2391 2300
2408 2218
2059 2216
2233 2464
2172 2136
1577 2133
2575 2084
2123 2489
2183 2215
1948 2524
2588 2384
2247 2304
2446 2492
1946 1971
2417 2102
2460 2300
2196 2292
2543 2348
2321 2178
2574 2559
2619 2468
2108 2109
2172 2563
2556 2266
2582 2268
2052 1920
2419 2610
2278 2348
2271 2329
2237 2030
2574 2240
2319 2643
2659 2364
1948 2511
2334 2019
2125 1932
2154 2307
2035 2107
2122 2353
2560 2216
2590 2218
2598 2472
1917 2464
2047 2361
2139 1917
2356 2482
2313 2133
2103 2374
2104 2165
2631 2324
2411 2397
2220 2560
1943 2430
1954 2111
2659 1951
2154 2326
2095 1962
2519 2002
2458 2399
2309 2370
2331 2086
1999 1951
2461 2555
2448 2562
2184 2520
2023 2317
2309 2257
2115 2201
2117 1955
2002 2143
2172 2220
2559 2165
2332 2057
2323 2560
2551 2299
2183 2174
1997 2218
2560 2220
2123 2418
1935 2097
2649 2555
2348 2088
2059 2240
2626 1914
2430 2142
1946 2638
2404 2507
2105 2126
2533 2196
2011 2097
1951 1958
2103 2308
2598 2273
2078 2058
2404 2290
2611 2604
2257 2386
2213 2619
1931 2192
2059 2356
2354 2446
1984 2045
2117 1940
2164 1979
2266 2324
2054 1959
2461 2279
2333 2028
2491 2007
2189 2550
2299 2073
2576 1943
2537 2508
2037 2409
1914 2365
2138 2543
2275 2122
1963 2237
2104 2323
1948 2038
2623 2040
2423 2601
2539 2554
2124 2216
2157 1976
2059 2546
2428 1993
2300 2164
2543 2042
2381 2467
2063 2306
2651 2505
2370 2271
2123 2462
2395 2206
2109 2604
2103 2020
2626 2159
2162 2540
2112 2240
1954 1926
2559 2084
2376 2073
2240 2484
2196 2007
2271 2020
1963 2323
2625 2139
1943 2033
2303 2391
2250 2169
2348 2482
2188 2575
2218 2485
2460 2468
2254 2510
2190 2339
2033 2520
2308 2611
2560 2381
2112 2418
2578 2078
2297 2585
2046 2409
2354 2430
2354 2553
2084 2407
2552 2601
1984 2560
2268 2018
2605 2029
2487 1961
2410 2271
2294 2533
2558 2548
2593 2359
2188 2115
2519 2028
1988 2444
2364 2004
2229 2625
2372 2302
2216 2638
2535 2487
2611 1971
1939 136
2414 2546
1993 2395
2273 2149
1991 1951
2144 2183
2347 2212
2492 2374
2623 1971
2023 2089
2604 2369
2352 2056
2468 2213
1917 2543
1954 2343
2625 2020
2083 2575
2436 2419
2323 2074
1953 2020
2199 2451
2324 2020
2508 2279
2384 2151
2529 2203
2033 2059
2412 1915
2615 2220
2511 2026
2659 1931
2232 2547
2302 2328
2516 2511
1946 2275
2374 2499
2199 2132
2347 2625
1954 2327
2300 2064
2150 2464
2332 2458
2165 2275
1939 2377
2154 2201
1983 2323
2196 2148
2409 2324
2149 2588
2007 2379
2598 2642
2617 2434
2436 2463
2539 2323
2033 1989
2338 2555
2037 1986
2646 1962
2086 2123
2074 2218
2240 2103
2582 2543
2376 2212
2211 2345
2224 2328
2282 1959
2276 2495
2353 2093
2507 2460
2546 2237
1971 2460
2348 2615
2173 2341
2601 1946
2346 1919
2430 2074
2282 2616
2625 1929
2122 2606
2484 2108
2590 1917
2006 2627
2271 1985
2129 1960
2560 2212
2199 2029
2268 2635
2506 2078
2338 2062
2165 2078
2026 2629
2446 2646
2164 1986
2381 2560
2243 2603
2223 2445
2574 2500
2188 2108
2624 2216
2301 1956
2267 2054
2228 2089
1991 2171
1465 2282
2654 2395
2108 2655
2638 1983
2516 2125
2401 1992
2537 1947
2170 1992
2275 2093
2084 2427
2378 136
1940 2643
2229 2576
2425 1964
1941 2489
2200 2546
2543 2482
2165 2040
2139 2033
2329 2108
2602 1979
2623 2142
2593 2090
2153 2137
2611 2601
1926 2209
2266 2046
2292 136
2477 2624
2306 2326
2139 2123
2121 1918
2390 2282
2126 2173
2194 2273
2038 2653
2543 2323
2485 2464
2226 2283
2353 2212
2370 2088
2573 2331
2340 2539
2467 2172
1986 2334
2552 2655
2293 1941
2574 2088
2159 2024
2578 2554
2343 2149
2241 1954
2060 2572
2136 2543
1926 2268
1929 2339
1935 1931
2142 2084
1948 2128
2367 2345
2611 2499
1993 2095
2247 1920
2184 2655
2467 2329
1997 2309
2067 2234
1926 2566
2278 2240
2108 2526
2529 2459
136 2629
2064 2408
2060 2200
2123 1979
2499 2433
1951 2459
2150 2348
2199 2161
2111 2617
2290 2504
2228 2107
1962 2484
2573 2464
2306 2045
1921 2143
2619 1966
2067 2189
2339 1918
2142 2233
2196 2054
2546 2030
2189 2512
2489 2184
2624 2275
2351 2292
2010 2111
2385 2302
2370 2266
2568 2222
2240 2253
2646 2136
2414 2353
2062 2101
2309 2109
2607 2165
1955 2039
1962 2428
2428 2043
2030 2408
2551 2484
2293 2282
2649 1945
2292 1941
1938 1941
2655 2118
1920 2567
2588 2180
2593 2216
2476 2131
2567 2609
1918 2500
2600 2147
2243 2075
1983 2464
2151 2068
2026 2588
2190 2428
2033 2356
2161 1970
2220 2433
2611 2584
2028 2616
2446 1946
2118 2220
2206 2078
2183 1994
2102 2285
1995 2647
2458 2279
2511 2438
2351 2289
2278 2309
2638 2418
2128 2537
1934 2440
2056 2553
2494 2016
2619 2340
2240 2625
2376 2602
1943 1983
2207 1988
2611 2136
1980 1927
2131 2340
2645 2648
1465 2598
2339 2504
2069 1962
2576 2536
2473 2127
2402 2488
2579 1962
2096 1939
1465 2125
2241 2132
2526 2108
2154 2381
1941 2276
2004 2648
2083 1966
2078 2290
2043 2602
2107 2085
2615 2266
1577 2038
2201 2485
2237 2339
2469 2600
2102 2241
2324 2086
2220 2210
2108 2553
2116 1951
2331 2574
2550 2308
2463 2653
2118 2482
2507 2623
2101 2062
2150 2482
2297 2538
2280 2264
2090 2579
2309 2233
2393 2542
2511 2087
2560 2237
2257 2131
2593 2506
2385 2543
2496 2187
2089 2371
2118 1966
2176 2169
2603 2568
1962 2460
2103 2625
1938 2200
1465 2332
2123 2043
2379 1926
2615 2575
2575 2045
2604 2261
2200 2630
2408 2392
2647 2171
1993 2573
2174 2581
2287 2123
2033 2554
2310 2525
2374 2410
2142 2083
2121 1938
2278 2242
2398 2224
2446 2339
2242 2038
2654 2086
2053 2609
2290 2206
2083 2561
2289 2597
2183 2533
2062 2396
2174 2241
2449 2561
2657 2346
2532 2574
1962 2261
2485 2311
2417 2215
2356 2423
1983 2433
2543 2229
2423 2359
2506 2090
2190 2340
2647 2284
2334 2386
2271 2030
2559 2410
2395 2266
2347 2339
2560 2469
2074 2646
2633 2657
2469 2033
1973 2626
2593 2654
2554 2564
2033 2210
2370 2414
2544 2328
2309 2625
1984 2326
2229 2484
2351 2144
2653 2191
1943 2604
2563 2600
2641 2557
2384 2057
2503 2497
1959 2603
2463 2592
1926 2594
2292 2498
2516 2510
1987 2419
2436 2398
2243 2594
2039 2643
2223 2279
2209 2038
2069 2559
2337 2640
2056 2271
2132 1959
2259 2199
2414 2478
2064 1963
2165 2271
2376 2077
2504 2154
2085 2379
2338 2384
2350 2391
2492 2086
2478 2619
2149 2294
1997 2543
2348 2139
2467 2526
2194 2153
2526 2309
2043 2559
2235 2072
2307 2229
2241 2617
2629 2588
2467 2543
2607 1986
1926 1932
2553 2395
2090 2088
2372 2319
1943 2309
2305 2117
2223 2498
2063 2139
2484 2140
2408 2428
2172 2299
2410 2387
2031 2610
2132 2282
2555 2608
2392 2339
2600 2121
2173 2047
2597 2189
2247 2608
2293 2302
2323 2083
2369 2611
2356 2073
2553 2492
2576 2131
2165 2220
2508 1941
2190 2601
2551 2356
2643 2327
2414 2506
2063 2340
2428 2095
2174 2616
2395 2046
2090 2184
2068 2194
2088 2591
2146 1915
2196 1465
2359 2059
2180 1939
2415 2003
2134 2187
2429 2561
2307 2299
2624 2484
2088 2593
2352 2630
2613 2179
2507 1984
2244 2504
2266 2606
2451 2434
2224 2465
2018 2640
2244 2468
1966 2359
1941 2028
2117 2594
2416 2296
2133 2510
2410 2064
2149 2384
2346 2435
2228 2397
2326 2237
2640 2648
2131 2623
2419 2649
2083 2323
2125 2398
2413 2389
2090 2418
2189 1964
2415 2328
2323 2520
2391 2092
1953 2043
1925 2030
2241 2189
2053 2289
2276 2131
2610 2498
2488 2644
2578 2077
2131 2200
2077 2069
2073 1985
1925 1993
2220 2356
2212 2492
1944 2298
2063 1984
2010 2149
2586 2575
2430 2646
2140 2408
2542 2258
2601 2506
2338 2465
2377 2274
2063 2446
2409 2408
2547 2081
2050 2022
2156 2251
1973 2538
2409 2201
2344 2003
2304 2180
2619 2090
2063 1963
2368 2649
2053 2537
2420 2302
2433 2591
2089 2614
2645 2364
2353 2324
2659 2645
2275 2546
2434 2125
2603 2396
2294 2501
2469 2206
1947 2436
2361 2119
1983 2460
2586 2233
2506 2624
2329 2118
1948 2010
2289 2071
2238 2360
2484 2244
2336 2366
2307 2104
2206 2055
2043 2654
1984 2551
2369 2428
1954 2594
1953 2086
2057 2087
2146 1960
2120 2317
2328 2250
2135 2174
2473 2543
2098 2084
2272 2480
2578 2354
2641 2419
2488 2089
2348 1993
2194 2239
2060 2393
2602 1929
2115 2154
2068 2461
2563 2326
2200 2520
2109 2492
2299 2290
2521 2306
1718 2199
2068 2463
2334 2326
1943 2109
2492 2593
2555 2292
2643 2351
2220 2395
2611 2084
2537 2473
2551 2271
1946 2069
2460 2504
1941 2319
2599 2153
2071 2010
2118 2561
2323 1941
2604 2108
1985 2601
2052 2002
2206 2200
2586 2655
2073 2460
2264 2180
2553 2532
2642 2134
2187 2330
2239 2338
2059 2575
2356 2220
2428 2546
2240 2630
2282 1916
1955 2223
2644 2049
2046 2507
1938 2507
2154 2507
2539 2370
2640 1954
2263 2431
2347 2500
2582 2183
2197 1975
2285 2597
2414 2560
2463 2028
2271 2559
2446 2172
2643 2163
2218 2376
2139 2165
2484 2554
2040 2206
1978 2314
2622 1988
2261 1966
2550 1983
2206 2179
2537 2304
2463 2002
2464 2601
1997 2604
1955 2111
2482 2408
2250 2203
2573 2561
2376 2046
2125 2143
2485 2539
2201 2115
2306 2428
2471 1932
2025 1919
2071 1948
2102 2327
1946 2331
2264 2087
2502 2223
1935 2389
1465 2134
2250 2344
2261 2428
2646 2430
2038 2007
1929 2275
2052 2292
2180 2194
2475 2304
2366 2592
2220 2543
2607 2307
2506 2590
2124 2526
1918 2601
2026 1577
2410 2093
2423 2607
1946 2098
2542 2536
2054 2555
2606 2543
2294 2292
2074 2086
2485 2604
2575 1986
2253 2184
2047 2471
1925 2536
2171 1980
2623 2124
1964 2608
2381 2090
2658 1951
2623 2356
2279 2138
2560 2507
2310 2133
1960 1975
2206 2381
1979 2139
2139 2370
1997 2063
2149 2434
1916 2032
2410 2347
2039 2282
2589 2151
2395 1993
2519 2471
2509 2501
2133 2319
2136 2464
2161 2537
2309 2240
2267 2555
2600 2172
2010 2351
2084 2323
2086 2468
2071 2144
2368 1952
2289 2294
1966 2308
2218 1997
2507 2607
2312 2413
2428 2140
2526 2500
2247 2183
2485 2122
2183 2608
2218 1962
1938 2005
2369 2347
2247 2629
2271 2607
2451 2512
2122 2077
2202 2297
2244 2201
1955 1945
2613 2240
2156 2173
2508 2294
2575 2468
2124 2556
2247 2282
2059 2484
2356 2056
2608 2396
2155 1923
2485 2615
2559 2188
1997 2340
1718 2176
2022 2472
2428 2564
2216 2201
2083 2184
2279 2384
2495 2409
2183 2653
2598 2081
2078 2536
2525 2416
2410 2573
2174 2338
2629 2400
2131 2121
2042 2332
2119 2361
2308 2469
2492 1993
2112 2482
2429 1942
2098 2213
2121 2564
2495 2240
2340 2356
2037 2131
2112 2370
2430 2560
2553 2433
2407 2423
2140 2560
2095 2464
2054 2151
1929 2290
1942 2058
2501 2415
1948 2328
2567 1932
1962 2275
2419 2616
2010 2384
2226 2085
2492 2553
2032 2039
2315 2194
2511 2510
2468 2601
2331 2404
2069 2123
1919 2284
1941 2516
2550 2499
2338 2039
2180 2589
2206 2150
1979 2586
1926 2304
2037 2112
2292 2511
1985 2428
2404 2118
2579 1925
2475 2203
2187 2508
2110 2161
2522 2176
2053 2138
2102 1948
2523 1934
2299 2108
2010 1954
2053 2333
2218 1946
1985 2287
2286 2403
2308 2323
2333 2458
2509 1941
2409 1985
2458 2189
2241 2420
2404 2602
2604 2184
2095 2056
1938 2122
2575 1979
2302 2377
2189 2187
2087 2533
2212 2142
2326 2485
2247 1718
2322 2557
2607 2020
2087 2191
2095 1966
2393 2142
2150 1966
2003 2333
2433 2313
2646 2324
2359 2464
2327 2053
2276 2654
2010 2052
2498 2254
2335 1930
2409 2109
2479 2132
2404 2122
2092 2429
2395 2005
2304 2471
2026 2176
2170 2490
2496 2138
2373 2193
2642 2128
2328 2177
2440 2181
2047 2028
2196 2319
1962 2536
2184 1997
2240 2611
2235 2501
2654 2410
1921 2640
2300 2646
2133 2209
2636 2018
2643 2605
2550 2206
2576 2056
2461 2537
2151 2010
2339 2624
2377 2475
2626 2659
2242 2395
2305 2102
2323 2485
2001 2018
2135 2330
2444 2207
1954 2250
2485 2430
2578 2460
2218 2356
2520 1984
1943 1986
2290 2154
1941 2379
2045 2064
2578 2074
2579 2045
2533 2148
2418 2287
1946 2546
2174 2328
2428 2067
2619 2073
2239 2347
2512 1718
2327 2223
2323 2460
2138 2133
2564 2601
2087 2042
1931 2004
2582 2117
2616 2128
2555 2344
2551 2278
2093 2559
2643 2533
2354 2124
1920 2653
2336 1948
2176 2289
2275 2464
2275 1989
2223 2332
1935 2011
2090 1966
2337 1980
2304 2384
1999 2647
2052 2592
2258 2646
2589 2398
1957 2435
2478 2393
136 2223
2516 2384
2341 2321
2624 2206
2543 2598
2018 2337
2445 2072
2327 2434
2189 2102
2492 2624
2607 2172
1986 2376
2189 2555
2433 2615
2281 2245
2194 2653
2469 2150
2399 2344
2188 2213
2354 2549
2172 2093
2257 2340
2434 2458
2510 2153
2593 2619
2630 2386
1986 2090
2154 2374
2433 2376
2627 1914
2468 2233
2148 2458
2266 2308
2609 1577
2575 2433
2253 2210
2327 2384
2410 2261
2215 1941
2504 2258
2497 2277
2460 2482
2413 2247
2093 2118
1718 2653
2284 2648
2040 2142
2322 2412
1997 2118
2267 2325
2211 1923
2043 2611
2326 2602
2368 2616
2600 2467
1959 2293
1943 2386
2229 2233
2109 2164
2083 2464
1946 2184
2108 2275
2347 2555
2379 2223
2392 2261
2520 2414
2128 2502
2474 2411
2201 2005
2374 1984
2323 2055
2199 2039
2368 2328
2032 2196
2268 2417
2601 2206
1993 2140
2191 2305
2240 2275
2336 2032
2200 2103
2339 2630
2468 2428
2148 2137
2033 2532
2292 2289
2573 1985
2372 2053
2487 2535
2108 2630
2611 2240
2414 2124
2383 2058
2340 2370
2619 2553
2587 2129
2093 2306
2333 2533
2575 2064
2279 2215
1993 2276
1918 2578
2642 2133
2044 2602
2389 2512
2005 2104
2488 2360
2289 2254
2659 2365
1962 2521
2059 2078
2212 2404
2330 2180
2539 2604
2306 2308
2339 1993
2468 2140
2606 2339
2093 2654
2005 2122
1993 2611
2646 2347
2333 2241
2272 2222
2071 2377
2659 2284
2608 2399
2324 2414
2199 2345
2109 2506
2498 1926
2657 2583
2334 2154
2506 1943
2624 2578
2508 2594
2543 2140
2236 2523
2526 2445
2504 2201
2593 2574
2084 2552
1995 2016
2028 2592
1964 1941
2507 2037
2066 2211
2458 1577
2088 2464
2446 1953
2396 2511
2210 2326
2187 2516
1993 2550
2180 2038
2385 1941
2328 2557
1951 2636
1959 2385
2059 2200
2043 2430
2244 2543
2559 2433
2309 1943
2339 2564
2043 2165
2064 2376
2040 2139
2206 2593
2022 2364
2033 2369
2229 2299
1943 2334
2232 2345
2140 2046
2409 2306
2369 2646
2064 2090
2435 1957
2640 2009
2101 2054
2241 1718
2157 2645
2307 2253
1577 2062
2059 2591
2460 2586
2551 2077
2526 2590
2102 2588
2370 2625
2492 2276
2496 2629
1986 2150
2377 2629
2083 2504
2485 2376
2121 2090
2551 2590
2267 2203
1997 2532
2103 2414
2410 2460
2169 2196
2279 1964
2199 1939
1929 2083
2289 2038
1926 2461
2292 1945
2325 2133
2068 2169
1984 2074
2155 2501
2001 2364
2276 2213
2590 2213
2611 2063
2489 2370
2619 2611
2555 2194
2030 2213
2498 2509
2330 2617
2239 2143
2149 1940
2010 2567
2199 1465
2343 2117
2350 2271
1954 2117
2194 2597
2037 2154
2436 2223
2244 2654
2381 2485
1985 2233
2266 2546
2438 2096
2409 2407
2032 2280
1985 2591
2593 2206
2586 2600
2448 1960
2549 2233
2140 2446
1465 2203
2261 2123
2220 2489
2564 2619
2073 1963
1930 2397
2593 1938
2465 2543
2518 2611
2654 1993
2138 2052
2551 2446
1465 2491
2419 2416
2042 1718
2406 2473
1915 2587
2174 2180
2300 2086
2373 2412
2322 2211
2139 2306
2280 2598
2240 2150
1972 1991
2461 2588
2363 2381
2003 1947
2468 2552
2445 2384
2112 2601
2155 2641
2409 2625
2171 2012
2064 2020
2458 2652
2615 2020
2446 2271
2098 2073
2126 2335
2333 2294
2040 2109
1953 1917
2071 2328
2030 2654
2387 2532
2275 1929
2242 2313
2005 2331
2468 2279
2411 1930
1960 2371
2586 2414
2083 2354
2249 2068
2074 2593
2512 2176
2271 2103
1943 2526
2043 2188
2370 2216
2172 2179
2331 2593
2124 2354
2566 2038
2189 2567
2064 2005
2261 2300
2468 2327
2279 2327
2536 2630
2616 2268
1972 2659
2018 2648
2126 1960
2149 2471
2123 2112
1953 2347
2586 2631
2415 2132
2480 2117
2148 2333
2293 2629
2153 2007
2104 2414
2339 2593
2636 1998
2556 2307
1931 2633
2090 1985
2374 2623
2538 1927
2625 2046
2169 2246
2148 1940
1921 2633
2324 2339
2533 2102
2278 2090
2342 2644
2273 2461
1913 2389
2637 2272
2578 2290
2409 2040
2244 2615
2124 2578
2324 2240
2638 2216
2347 1971
2071 2054
2165 2190
2363 2059
2132 2222
2529 2555
2524 2073
2087 2053
2257 2543
2509 2304
2479 2199
2031 2205
2510 2518
2508 2567
2395 2500
2414 2046
2485 2468
2540 2637
2244 2140
2356 1986
2206 2460
2275 2630
2340 2306
1985 2499
1955 2394
2220 2559
2372 2047
2549 1946
2313 2361
2030 2104
2585 2659
2475 2052
2499 2030
2523 2488
1968 1921
2559 2218
2420 2117
2445 2133
2451 2336
2410 2021
2359 2090
2530 2208
2532 2655
2249 2087
2344 2498
2482 2043
2289 2166
2655 2606
2220 2122
2602 2275
2343 2133
2359 2131
2282 2394
1938 2334
2136 2244
1960 2313
2010 2187
2154 2352
2440 2313
2492 2164
2573 1918
2590 2575
2174 2537
2144 2401
2513 2076
2578 2059
2630 2655
2408 2074
1916 2518
2289 2616
1918 2088
1916 2199
2194 2199
1979 2575
2650 2513
2445 2463
1984 1966
2093 2088
2531 2026
2326 2334
2633 2378
2575 2164
2272 2637
2471 2436
2539 1962
1926 2149
2489 2363
2275 2142
1983 2600
2212 2030
2440 1960
2177 2451
2059 2601
2510 2002
2372 2594
1981 2394
2221 2641
1929 2507
2020 2615
2482 2521
2526 2210
2416 2141
2567 2210
2446 2549
2074 2489
1954 2203
2324 2307
2128 2203
2386 2190
2479 2111
2629 2502
2143 1972
1947 2327
2525 1970
2102 2336
1913 2250
2278 2188
2020 2520
2556 2504
2412 2656
2078 2299
2348 2331
2259 2068
2646 2064
2365 2636
2436 2128
2326 2339
1940 2153
2605 2242
2209 2242
1995 2494
2143 2649
2449 2623
2297 2620
2098 2551
2118 2579
2001 1951
1962 2043
2063 2408
2161 2522
2199 2087
2340 2552
2608 2047
2643 2282
2320 2076
2590 2460
2555 2273
2324 2064
2526 1941
2556 2184
2485 2278
2347 1943
2508 2471
2387 2142
2374 2615
2071 1577
2472 2032
2146 2173
2068 2283
2033 2593
2559 2395
2334 2201
2148 2592
2143 2436
2290 2088
2532 2229
2104 2573
2125 2243
2491 2127
2059 2109
1972 2531
2118 2404
2092 2507
2306 2489
2474 2289
2311 2521
2289 2511
2241 2594
2240 2258
2039 2417
2543 1994
2138 2148
2521 2309
2640 2171
2356 2500
2343 2026
2326 2552
2040 2323
2606 2077
2011 1931
1946 1997
2030 2561
2352 2354
2556 2574
2188 2030
2500 2392
2542 2115
2052 2294
2496 2081
2311 2253
2590 2469
2347 2220
1953 2507
2376 2154
2608 2543
2393 2584
2409 2307
2323 2257
2508 1932
2573 1946
2258 2504
2630 2576
2171 2364
2592 2127
2469 2340
2430 1917
2608 2294
2199 2294
2365 2364
2109 2121
2037 2142
2346 1998
2309 2376
2068 2512
2201 2339
2594 2461
1976 1973
2410 2512
2302 2071
2109 2045
2299 2154
2503 1975
1577 2327
2011 2157
2132 2458
2358 2313
2549 2201
2218 2037
1984 2257
2348 2083
2112 2477
2046 2108
2586 2630
2520 2253
2460 2615
2081 2351
2549 2356
2467 2253
1989 2593
2492 2604
2194 2196
2324 1985
2512 2302
2184 2492
2043 2306
2045 2526
2122 2428
2003 2328
2233 1984
2336 2191
2340 2216
2392 2299
2181 2405
2243 2235
2512 2254
2391 2244
2037 2560
2616 2176
2073 1929
2488 2335
2537 2138
2430 2043
2504 2563
2631 2309
2575 2179
2143 2582
1980 2647
2302 2597
2188 2423
2533 2319
2088 2184
2131 2381
2133 1955
2492 2064
2553 2266
1929 2409
2417 1994
2471 2384
1983 2073
2229 2370
2376 2348
2084 2512
2134 2463
2216 2507
2659 1914
2551 2090
2390 2501
2635 2345
2559 2348
2561 2104
2132 2081
2575 2418
2059 2073
2257 2590
2494 2538
2491 2294
2356 2369
2122 2414
2299 2098
2578 2220
2607 2409
2063 2278
2140 1929
2555 2137
2083 2381
2261 1962
2201 2037
2077 2590
2605 2309
2615 2233
2659 2297
2164 2276
2593 2188
2180 2176
2206 2184
2074 2591
2039 2653
1577 2567
2658 2659
2532 2201
1997 2237
2495 2552
2484 2165
2464 2446
2543 2053
1998 2000
2607 2078
2042 2592
2240 2477
2201 2409
2377 2338
2564 2356
2039 2144
2552 2408
2537 2367
2324 2078
1984 2266
2343 2250
2235 2333
2165 2624
2552 2495
2410 2086
2275 1997
2028 1916
2564 2240
2233 2489
1979 2240
2615 2543
2400 1913
1979 2654
2152 1990
2020 1979
2283 2465
2090 2308
2655 2340
2233 2287
2061 1995
2150 2376
2463 2224
2179 2575
2359 2423
2469 2542
2410 2575
2605 2298
2572 2199
2328 2617
2630 2059
2045 2190
1966 2630
2143 1954
1958 2645
2504 2578
1983 2601
2184 2200
2271 2261
2173 2534
1926 1718
2212 1985
1946 2033
2073 2381
2579 2564
2005 2213
2242 2117
2414 1985
2489 2347
2144 2594
2365 2627
2601 2561
2616 2436
1973 2648
2338 2194
2081 2582
2020 2542
2179 2218
1920 2468
2353 2123
1954 1916
2408 2056
1918 1971
1718 2054
2064 2139
2093 2604
2467 2103
2563 2200
2377 2180
2600 2275
2136 2201
2502 2629
2139 2122
2039 1948
1942 2218
2244 2190
1577 1959
2638 2381
2288 2214
2434 2054
2183 2163
2131 2090
1994 2567
2351 2039
2131 2449
2582 2189
2073 2121
2282 2310
2440 2126
1938 2429
2109 2520
2414 2184
2086 2539
2191 1577
2299 2655
1971 2563
2637 2642
1963 2073
2264 2002
2638 2020
2411 2146
1979 2278
2589 2054
2407 2553
2660 2116
2180 2372
1945 2594
2059 2339
2617 2289
2359 2590
1928 1995
2331 2408
2334 2077
2482 2220
2343 2325
2064 2271
2196 2475
1932 2187
2498 1718
2096 2222
2045 2556
2007 2038
2031 2291
2174 2279
2031 2325
2593 2020
1992 2466
2213 2078
2292 2134
2562 2618
1966 2590
2468 2464
1946 2124
2491 2543
2411 2236
2560 2007
2259 2594
1920 2398
2430 1918
1916 2298
2267 2047
2578 2188
2461 2002
2491 2283
2198 2294
2617 2537
1947 2174
2264 2187
2196 2629
2468 2240
2047 2007
2573 1979
2363 2602
2560 2233
2588 2465
2098 2210
2078 2607
1923 2518
2138 2537
2460 2216
2351 2283
2466 2076
2381 2602
2553 2188
2275 2418
2334 2331
2615 2542
2555 2302
2511 2616
2543 2351
2043 2469
1963 2244
2339 2098
1966 2109
2103 2395
2386 2340
2327 2533
2645 2538
1954 2153
2069 2331
2391 2607
2430 2500
2116 2633
1943 2179
2103 2407
2090 2446
1935 2004
2122 2339
2108 1963
2032 2377
2059 2600
2609 2148
2085 2296
2347 2123
2510 2203
2277 2497
1980 1935
1941 2423
2172 2586
1993 2590
2396 1939
1973 2346
2563 2552
2123 2020
2127 2608
2001 1973
2109 2410
2074 2005
2093 2216
2419 2272
2257 2526
2203 2336
2448 2089
2043 1985
2103 2184
2045 2468
2485 2043
2218 2121
2632 2051
2206 1986
1960 2091
1465 2267
2590 2579
2187 2224
2229 2586
2052 2603
2081 2420
2607 2563
2340 2033
2133 2588
2655 2625
2072 1947
2567 2582
2501 2282
2211 2367
2116 2006
2554 2323
2069 2374
1936 2173
2283 2598
2073 2123
1953 2600
2417 2171
2631 2212
2275 2244
2484 2542
2334 2374
2172 2300
2428 2090
2127 2153
2203 1577
2344 2247
2500 2353
2240 2408
2347 2151
2067 2393
2064 2630
1997 1971
2165 1946
2348 2492
2616 2254
2266 1925
2418 2059
2177 2294
2278 2600
2352 2077
2093 2069
2561 2467
2477 2123
2037 1946
1946 2229
2480 2182
2033 2359
2430 2409
2433 2464
2143 2283
2077 2118
2108 2201
2446 2033
2095 2093
2347 2374
2649 2351
2543 2172
1926 2598
2448 2614
2004 1927
2347 2026
2510 2032
2150 2429
2078 2043
2005 2233
2592 2332
2428 2045
2336 2458
2153 2224
2500 2266
2241 2149
2275 2404
2374 2069
2253 2188
2507 1943
2112 2179
2154 2428
2059 2586
2356 2090
1985 2655
136 2111
2205 2211
2604 2654
2053 2239
2124 2423
2261 2136
2180 2398
2111 1939
2240 2550
2369 2142
2314 1978
2564 2139
2088 1925
2508 2516
2081 2174
2190 2121
2593 2220
2188 2446
2254 1926
1926 2259
2164 2600
2000 2192
1979 2210
2328 2143
1970 1981
2132 2280
2404 2040
2578 2108
1962 2140
2472 2533
2482 2539
2428 2083
2611 2218
2551 2597
2290 1993
2474 2158
2294 2368
2495 2551
2046 2244
2520 2121
2007 2254
2332 2134
2657 2647
2296 2232
2122 2307
2336 2071
2329 2201
2659 1954
2184 2189
2374 2299
2211 2416
1966 2354
2233 1941
2395 2586
2282 2328
1946 2179
2539 2376
2187 2176
1972 2000
2610 1926
2464 1989
2519 2649
2532 2520
2475 2111
2538 2061
2300 2055
2240 2184
2072 2081
2501 2266
2410 2090
2492 2150
2607 2446
1982 2345
2243 2547
2345 2510
2148 2463
2302 2191
2467 2095
2340 2063
2279 2101
2244 2033
2559 2363
2279 2047
2489 2428
2309 2467
2585 1921
2086 2200
2284 2001
2496 2180
2168 2421
2586 2611
2462 2090
1976 2639
1951 2116
2616 1913
2164 2604
2156 2160
2210 2624
2526 2207
2218 2229
2109 2561
2154 2067
2224 2072
2555 2081
2283 2126
1988 2486
2058 2043
2233 2139
2194 2032
2102 2026
2054 2196
2491 2345
2083 2244
2374 2074
2318 1923
2539 2142
2073 2088
2560 1985
2217 2422
2200 1989
2574 2078
2001 2645
2638 2213
2169 2002
2212 2020
2526 2354
2354 2030
1989 2083
2591 2590
2154 2045
2199 2148
2102 1994
2475 2328
2138 2338
2055 2302
2112 2630
2326 2418
2093 2376
2199 2471
2361 2228
2376 1918
2623 2229
2139 2348
2326 2507
2002 2264
2359 2340
2288 2092
2564 1917
2654 2615
2073 2307
2054 2458
2398 2285
2045 2477
2374 2244
2347 2489
2419 2608
2143 2377
2165 2449
1920 2609
1922 2126
2549 2433
2087 2268
2147 2067
2199 2319
1927 1972
2030 2602
2237 2290
2088 2073
2460 2275
2077 2206
2276 2410
2212 2140
2043 2324
2633 2639
2271 2549
1995 2000
2556 2602
2561 1929
2624 2549
2267 2039
2153 2052
2336 2293
2573 2206
2500 2005
2624 2266
1945 1926
2489 2136
2211 2272
2568 2072
2276 2408
2127 2629
2312 2116
2278 2347
1938 1917
2103 2489
2087 2169
2556 2460
2110 2432
2625 2056
2005 1985
2139 2307
2341 1919
2658 1921
2618 2558
2615 2624
2216 2559
2261 2220
2586 2430
1918 2329
2329 2190
2307 2586
1993 2604
2551 2462
2246 1939
2297 1999
2108 2370
2542 2561
2095 2077
2461 2010
2475 1920
1966 2062
2143 1921
1926 2068
2229 2467
2370 2409
2602 2539
2323 1938
2623 2464
1947 2180
2654 2560
1966 2093
2117 2250
2616 2169
2328 2498
2042 2153
2266 2055
1993 2253
2575 2536
2327 2328
1998 2636
2043 2408
2284 2585
2274 2111
1971 2526
2233 2339
2533 2589
2037 2615
2239 2007
2646 2482
2064 2095
2514 2066
2597 2491
2555 2283
2078 2467
2490 2259
2101 2608
2162 2173
2045 2220
2560 2020
1966 2112
2412 2119
2140 2112
2188 2482
2637 1964
2250 2187
2324 2139
2592 2510
2556 2210
2262 2545
2233 2218
2150 2200
2500 2261
2271 2073
2212 2308
1985 2074
2078 2606
2409 2253
2093 2083
2280 2132
2521 2045
2109 2043
2423 2655
2630 2326
1931 2620
2511 2135
2203 2629
2463 2038
1946 2504
2607 2200
2543 2237
2423 1925
2491 2617
2074 2073
2500 2369
1993 2108
2602 2638
2102 2475
2601 2429
1947 2511
2000 1995
2169 2511
2160 1933
2631 2607
2418 2206
2420 2111
1953 2381
2356 2108
2564 1962
2363 2477
2313 2230
2550 2495
2241 2398
1946 2381
2587 1915
2149 1920
2630 2212
2213 2095
2196 2133
2533 2071
2629 2319
2384 2053
2293 2279
2234 2499
1927 1919
2552 1918
1925 2601
1979 1985
2395 2606
2298 2425
2328 2531
2455 2412
2328 2194
2520 2164
2464 2276
2118 2433
2237 2520
2311 2560
2488 2628
2549 1983
2068 1948
2289 2322
2283 2294
1983 2630
2575 2460
2659 2025
2543 2611
2625 2579
2176 2310
2144 2283
2290 1966
2031 2366
2564 2615
2461 2368
2434 2279
1972 2639
2381 2354
2554 2464
2164 2040
1979 1989
2399 2332
2257 2464
2601 2495
2342 2456
1918 2030
2332 2399
2088 2033
2201 2359
2619 2574
2184 2433
2199 1577
2655 2624
2369 2381
2367 2211
2423 1918
2606 2575
2320 2515
2504 2485
2652 2054
2607 1984
2172 1953
2485 2625
2206 2543
2149 2332
2542 2323
2098 2104
2194 2144
2630 2261
2472 2087
2307 2619
2568 2101
2020 2625
2521 2543
2165 2261
2462 2302
1918 2374
2121 2430
2131 1917
1926 2134
2122 2370
2643 136
1976 2000
2220 2578
2491 2592
2296 2610
2069 2631
2171 2192
2561 2340
2395 2084
2369 2560
2606 2040
2266 2063
1973 2050
2649 1926
2499 2019
2135 2072
2028 2332
2354 2504
1941 2121
2037 2393
2200 1929
2030 2482
2652 2222
2077 2108
2611 2122
2627 1995
2370 2124
2127 2508
2509 2616
2146 2181
2196 2283
2573 2381
2499 2278
2492 2188
2343 2038
2131 2188
2001 1968
2617 2081
2180 2642
2319 1939
2374 2121
2603 2399
2068 2498
2586 2526
2283 2592
2224 2436
2386 2095
2434 1948
1947 2501
2122 2275
2010 2087
2319 2355
2467 2611
2629 2491
2616 1941
2259 2161
2074 2654
2194 1948
2074 2381
2354 1946
2247 2516
2464 2370
2446 2326
2075 2132
1926 2472
1919 2660
2043 2326
2586 2154
2095 2520
2654 2233
2591 2615
2149 2002
2020 2150
2060 2229
2116 1954
2510 1718
2073 2428
2588 2475
2206 2391
2539 2055
2630 2154
2405 2166
2363 2201
2046 2414
1918 2206
2030 2073
2063 2213
2073 2556
2324 1966
2140 2602
1929 2331
2266 2551
2059 2090
2374 2040
2582 2223
2646 2623
2409 2602
2345 2491
2489 2121
2429 2234
2030 2131
2430 2201
2363 2083
2072 2328
2410 2056
2345 2406
2615 2601
2323 2559
2200 1979
2253 2086
2638 2489
2073 2323
2573 2551
2344 2224
2525 2031
2328 2052
2308 2218
2081 2530
2039 2068
1993 2212
2611 2512
2267 1947
2536 1918
2040 2037
2006 2116
2563 2428
2533 1955
2624 2604
1918 1962
1979 1953
2150 1984
2123 2206
1962 2165
2235 2603
1929 2467
2521 2077
2190 2093
2327 2239
2574 2124
2315 2292
2602 2575
2061 2014
2044 2410
2306 2348
2184 1984
2244 2131
2273 2629
2011 2061
2378 2636
1917 1929
2476 2611
2379 2508
2289 2588
1970 2344
2117 2434
2115 2020
2071 2125
2127 2174
2507 2552
2275 2190
2311 2507
2604 2237
2479 2062
2409 2492
2366 2145
2276 2542
2052 2420
2178 2321
2117 2145
2532 2140
2500 2423
2326 1966
1997 1984
2610 2209
2480 2242
2200 1971
2555 2315
2307 1971
2078 2184
1929 2045
2615 2460
2561 2059
1953 2550
2341 1934
2258 2560
2250 2312
2278 1984
2083 2356
1997 2059
2159 2538
2563 2324
2395 2163
1941 2429
1953 1938
2560 2040
2020 1953
1948 2072
2142 2229
2631 2553
2201 2625
2294 1916
2115 2604
2250 2138
2340 2139
2294 1955
2611 2083
2240 2543
2460 2033
2327 2259
2136 2500
2624 2593
2218 2556
2244 2347
2381 2484
2389 2127
2523 2335
2631 2407
2049 2158
2176 2250
2137 2555
2111 2508
2468 2261
2289 2268
1951 1914
1941 2183
2283 2128
2482 2602
2135 2629
2083 2188
2599 2148
2184 2098
2283 2643
2121 2500
1929 2464
1991 2116
2611 1985
1943 2064
2506 2499
1986 2253
2376 2278
2446 2573
2645 2583
2325 2416
2395 2593
2561 2088
2054 2653
1984 1918
2253 2359
2300 2499
2489 2154
1913 2530
2399 2347
2655 2104
1940 2333
2064 2500
2433 2404
2573 2601
2292 1985
1919 1968
2363 1941
2423 2638
2469 2307
2200 2386
2093 2526
2575 2261
2056 2477
2196 2419
1577 2279
2336 2332
2289 2242
2206 2069
2228 2540
2374 2030
2635 2491
2428 1962
2036 2345
2111 2289
2135 2028
2220 2526
2630 2409
2207 2515
2631 2356
2111 2302
2376 2056
2033 2601
2200 1986
2266 2112
2356 2142
2575 2591
2607 2546
2395 2189
2071 2153
2181 2373
2116 2447
2056 2055
2220 2340
2589 2038
2524 2309
1718 136
2118 2395
2118 1953
2164 2220
2159 1935
2153 1945
2187 2007
2629 2125
2560 2055
2179 2122
2512 2032
2506 2340
2095 2414
1994 2071
2604 1929
2103 2546
2495 2579
2201 2122
2043 2352
2384 1920
2179 2212
2508 2134
2404 2083
2588 2543
2282 2537
2583 2657
2347 2059
2081 1465
2396 2509
2631 1917
1930 2313
2423 2307
2659 2648
2327 2081
2093 2340
2116 1972
2203 2338
2326 2261
2390 2199
2069 2624
2323 2631
2608 2282
1957 2636
2642 2028
2526 2043
2006 1998
2638 2630
2326 2484
2560 2506
2377 2479
2093 2485
2638 2464
2220 2624
2616 2567
2593 2306
2518 2304
2058 1966
2331 1963
2030 1946
2221 2438
1917 2309
2067 1942
2436 2589
2344 2451
2183 2328
2510 2072
2115 2602
2418 2464
1973 2024
2104 2308
2257 2478
2637 2325
2608 2169
2623 2064
2395 2428
2394 2377
2234 2303
2653 2555
2148 2332
2212 2395
2261 1983
1918 1963
2040 2574
2365 2640
2482 2624
2471 2273
2547 2285
2604 2586
2275 2309
2116 2004
2423 1989
2040 2103
2657 2171
2324 2083
2520 2237
2554 2276
1929 1943
2227 2107
2590 2123
2521 2604
2003 2344
1938 2553
2345 2594
2081 2333
2603 2394
2209 2637
2059 2410
2285 2555
2656 2193
2370 2593
2433 2560
2554 2142
2069 2619
2586 2410
2591 2045
2328 2149
2573 1962
2187 2293
2638 2164
2174 2052
2160 2238
2347 2002
2567 2616
2299 2551
2282 2042
2290 2507
2139 2150
2323 1966
2271 2112
2622 2550
2589 2102
2095 2359
2148 1718
2267 2642
2011 2025
2267 2511
1971 2469
2043 2410
2423 2275
2280 2062
2492 2253
2610 2085
2029 2362
2052 2471
2290 2430
2229 2118
2542 2266
2250 2617
2449 2165
2087 1970
2108 2564
2611 2189
2257 2615
2232 2267
2304 2177
2536 2142
2463 2582
2463 2325
2084 2188
2315 2072
2615 2309
1962 2299
2495 1986
1577 2592
2645 2192
1947 2509
2266 2418
2060 2308
2538 2001
2617 2087
2220 2037
2187 2609
2020 2184
2417 2594
2171 2225
2354 2109
2326 1993
2495 1941
2504 2607
2352 2602
2638 2404
2594 2543
2118 2059
2062 2069
2054 2053
2254 2547
2506 2600
2617 2054
2327 2117
2247 2222
2328 2533
2586 2058
1926 2642
2354 2095
1927 2640
2655 2278
2289 2512
2403 2503
2484 2266
2576 2257
2498 2452
2485 2140
1959 2111
2499 2404
2164 2188
1992 2207
1985 2492
2573 1971
2223 2294
1984 2606
2611 2354
2102 1718
2032 2594
2611 2030
2071 2137
2118 2124
2074 2625
2154 1997
1951 2639
2237 1943
1926 2475
2638 2109
2347 2083
2482 2073
2190 2590
2337 1976
2124 2482
2381 2172
2638 2308
2257 2506
2138 2128
2103 2237
2646 2088
2046 2275
2072 2232
1985 2189
2458 2280
2191 2555
2258 2233
2495 2324
2200 2086
2139 2257
2655 2407
2283 2199
2623 2429
2624 2104
2090 2573
2068 2589
2096 2062
2276 2484
2143 1968
2356 2428
2253 2564
2623 2121
2275 2462
1919 2011
2232 2614
2246 2176
1577 2007
2087 2065
1954 2273
2558 2119
2338 2026
2622 1992
2154 2058
2171 1928
2485 2290
1925 2164
2460 2347
1997 2266
2533 2134
2140 2624
1927 1999
2056 1918
2329 2104
2174 2133
2555 2187
2150 2606
2509 2002
2124 2552
2631 2578
2495 2586
2627 2648
2399 2616
1954 1931
2153 1932
1964 2361
2368 2608
2271 2469
2047 2313
2278 2077
2573 2184
2033 2184
2642 2318
2064 2290
2492 2546
2122 2363
2253 2164
2446 1938
1971 2506
2347 1954
2344 1959
2655 2131
2458 1947
2446 2543
2084 2550
2352 2179
2504 2369
2259 1988
2623 1984
2189 2039
1984 2646
1925 2564
2363 2428
136 2133
2491 2153
2038 2242
2328 1945
2242 2318
2586 2095
2179 2601
2068 2183
2406 2085
2368 2336
1953 2329
2075 1959
2489 2468
1983 2340
2212 2086
2516 2399
1920 2327
2591 2464
2458 2509
2356 2539
2104 2521
2573 2165
2033 2201
2348 2030
1918 2532
2253 2477
2414 2140
1979 2095
2018 1980
2020 2229
2423 2179
2253 2395
2590 2115
2340 2307
2176 2425
2551 1938
2169 2102
2131 2229
2123 2077
2563 2206
2277 2357
1968 2389
2543 2059
2559 2586
2038 1920
2098 2550
2567 2384
2509 2438
2582 2187
2306 2604
2509 2246
2059 2604
2494 2000
2123 2059
2462 2324
2583 2061
1943 2083
2461 2616
2631 2386
2546 2165
1983 2590
2222 1939
2042 1577
2250 2343
2097 2171
2259 2038
2082 2402
2592 2137
2649 1465
2611 2040
2098 1943
2278 2121
2629 2543
2313 1965
2045 2638
2218 2059
2173 2162
2509 2028
2267 2183
2174 1923
2203 2312
2261 2495
2347 2084
2126 2035
2518 2642
2127 2241
2244 2104
2153 2498
2117 2174
2563 2059
2211 2366
2520 2093
2161 2243
2053 2491
2348 2266
2347 2499
1926 2589
2366 1964
2313 2199
2131 2353
2563 1984
2138 2047
2235 2053
2190 1971
2552 2095
1918 2059
2073 2210
1948 2617
2032 2608
1945 2491
2409 2142
2331 2655
2348 2579
2194 2247
1987 2042
2374 2154
2169 2588
2290 2200
2141 2610
2654 1918
2121 2184
2102 2629
2526 2172
2471 2068
2656 2412
1946 2121
2615 2069
2372 2315
2624 2060
1983 2604
2407 2347
2059 2074
2150 1971
2617 1577
2047 2610
2067 2449
2607 2646
2095 2046
2625 2088
1945 2509
2324 2124
2552 2073
2104 2556
2148 2241
1931 2143
1992 2320
2541 2456
2552 2602
2394 2101
2604 2164
2315 2047
2308 2037
2654 2154
2171 2417
2586 2539
2331 2559
2164 2520
2069 2507
2294 2028
2510 2537
2372 2180
2417 1995
2218 2381
2560 2124
2302 2143
2378 2157
2212 1962
2352 2073
2603 2310
2408 2309
1948 2247
2052 2279
2472 2138
2111 2133
2399 2283
2598 2010
2273 2285
2381 2408
2253 2043
2330 2194
1983 2619
2607 2354
2394 2598
2200 2408
2033 2073
2030 2477
2602 2124
1962 1985
1946 2060
2247 2155
2302 1926
2193 1975
2038 2617
2073 2429
2398 2420
2542 2404
2083 2386
2109 2046
2210 2069
2546 2553
1935 2640
2354 2077
2241 1923
2564 2542
2520 2604
2333 2273
1953 2593
2125 2592
1914 2494
2266 2218
2482 2233
2615 2206
2477 2122
2336 2472
2364 2660
1970 2390
2068 2127
2058 2507
2602 2115
2410 2165
2069 1993
2313 1964
2462 1917
2078 2147
2187 2653
2043 2428
2552 2467
2098 2376
1941 2398
1927 2447
2072 2203
2002 2510
2206 2363
2392 2492
2043 2340
2024 2660
2451 2133
2055 2115
2020 2492
2625 2073
2429 2604
2175 2289
2291 2453
2044 2611
2473 2598
2607 2188
2246 2498
2409 2469
1941 2123
2240 2007
2420 2279
2551 2131
1983 2104
1926 2125
2469 2404
1946 2539
2074 2043
2108 2074
2261 2564
2551 2507
2084 2578
2233 2122
2552 2551
2336 2268
2118 2408
2367 2612
2560 1938
2363 2430
2133 2241
2518 2273
2642 2211
1972 2389
2228 2317
2600 2095
2283 2039
2125 2344
2161 2132
2460 2492
2262 2300
2216 2093
2009 1968
2266 2103
2111 2138
2121 2363
2043 2123
2246 2133
2078 2309
2451 2102
1979 2043
2150 2287
2532 2212
2377 2072
2289 2603
2072 2223
2200 2237
2555 2293
2140 1986
2561 2408
2200 2090
1938 2468
2268 2128
2469 2083
2446 2460
2199 2472
2087 2315
2196 2010
2559 2551
2179 2112
2458 2180
2494 1935
2043 2392
2116 2355
2179 2308
2594 2449
2539 2131
2120 2181
2169 2249
2372 2174
1959 1987
2414 2088
2459 2417
2404 2630
1918 2083
2013 1976
2325 2031
1960 2035
1951 1998
2608 2598
2509 2292
2203 2127
2053 2461
2576 2188
2549 2369
2467 2630
2026 2282
2187 2336
2137 2420
2007 2087
1971 2064
2654 1979
2290 2414
2309 2326
2489 2233
2414 2363
2189 2491
2043 2240
2289 1465
2625 2409
1986 2354
2391 1985
2519 2643
2212 2564
2491 2589
2409 2216
2154 2257
2093 2257
2560 2611
2507 2308
2231 2035
1972 2648
2267 2239
2060 2077
2123 2253
2223 2345
1927 2378
2290 1979
2558 2439
1983 2543
2086 2184
2153 2597
2552 2240
2347 2586
2560 2308
2220 2266
2561 2348
2064 2600
2554 2005
2063 1962
2586 2309
2153 2264
2589 2144
2459 1999
2056 2482
2273 2598
2601 2418
2266 2414
2104 2374
2598 2054
2601 2611
2289 2144
2655 2590
2520 2460
2056 2408
2294 2198
2519 2502
2074 2257
2045 2074
2244 1984
2183 2196
2537 2547
2418 2139
1982 2142
1985 2506
2278 2074
2042 2028
2215 1959
2056 2124
2218 2179
2543 2032
2165 1918
2428 2489
2046 2084
2174 1926
2040 2244
2123 2058
2645 1995
2133 2242
2237 2615
1917 1925
2257 2654
2418 2376
2485 2563
136 2157
2578 1993
1998 2016
2103 2369
2078 2103
2223 2519
2332 1945
2511 2247
2377 2537
1938 2216
1986 2078
2550 2213
2292 2028
2480 2239
2499 2261
2348 2593
2302 2081
1938 2040
2434 2652
1577 2609
2063 2485
2111 2533
2199 2608
2489 2172
2118 2428
2654 2353
1963 2140
2078 2520
1989 2606
2387 2542
2593 1917
2229 2630
2560 2348
2200 2261
2384 2111
2201 2363
2064 2546
2309 2646
2478 1938
2086 2139
2192 2365
2053 2132
1981 2161
2088 2353
2614 2089
1962 2619
1976 2157
2115 2624
1971 2218
1991 2225
2123 2237
2478 2543
2556 2123
2552 2309
2500 2654
2549 2423
2085 2186
2045 2363
2556 2030
2423 2115
2043 2271
1979 1918
2033 2602
1966 2581
2108 2233
2475 2267
2058 2309
2323 2611
2339 1983
2069 2469
2007 2183
2453 2176
2433 2213
1966 2449
2369 2485
2472 1940
2033 2428
2214 2345
2495 1943
1983 2542
2056 2638
2087 2398
2213 2410
2582 2333
2223 2254
2179 2184
2007 2282
1945 2039
2202 2171
2495 2165
1993 2046
2395 2311
2418 2074
2068 2224
1925 2485
2417 2459
2187 2398
2200 2212
2606 2602
2275 2240
2072 2282
2025 2159
2011 2494
2495 2363
2002 2247
2455 1922
2289 2174
2401 2076
2126 2162
1923 2185
2332 2642
2549 2363
2407 2404
1916 2111
2503 2047
2043 2554
2020 2376
2414 2369
2176 2603
1983 2109
2381 2391
2491 2232
2339 2369
2582 2042
2188 1953
2339 1963
2059 1946
2376 2307
1917 2240
2499 2524
2268 2458
1997 2464
2620 1951
2109 2430
2395 2098
2046 2210
2059 2083
2258 2376
2131 2220
2331 2108
2149 2246
2150 2638
2030 2446
2347 2250
2049 2397
2363 2630
2607 2376
2553 2339
2532 2108
2347 2005
2075 1939
1920 2196
2063 2624
2363 2088
2164 2324
2537 2417
2344 2198
2467 2326
2585 2620
2625 2095
2142 2553
2111 2117
1975 2173
2115 2109
2276 2206
2237 2063
2326 1946
2088 2216
2085 2235
2347 2372
2278 2363
2601 2257
2065 1985
1939 2280
2655 2499
1932 2199
2169 2039
2654 2464
1938 2306
2199 1916
2589 2071
2640 2050
2364 2633
2334 2500
2121 2521
2563 1997
2589 2174
2190 1983
2346 2337
2359 2112
2229 2030
2607 2464
2520 1966
2211 2322
1985 2037
2602 2370
2090 2615
2309 2410
2101 2461
1932 2151
2314 2534
2089 2402
2607 1989
2127 1945
2211 2473
2624 2369
2176 1944
2056 1917
2169 2475
2479 2161
2643 2491
2201 2083
2550 2556
1933 2577
2275 2206
2142 2433
2418 1929
1993 2164
2609 2629
2646 2478
1577 2068
2244 2600
2021 2564
2404 2460
2184 2063
2258 2005
2538 2027
2589 2325
2116 2157
2032 2420
2231 2497
2296 2416
2196 2087
2127 2246
2642 2597
2615 2147
2555 2510
2090 2395
2510 2396
2516 2198
2076 2401
2053 2547
2302 2472
2068 2377
2477 2374
2395 2306
2254 2451
2464 2240
2504 2218
2374 2340
2339 2109
2475 2135
2124 2467
2233 2630
2047 2282
2550 2184
2359 2564
2369 2464
2464 2638
2458 2653
2098 2574
2290 2334
2188 2631
2440 2497
1925 2520
2043 2407
2090 1953
2150 2323
2254 2327
2391 2350
2464 1925
2266 2154
2351 2047
2233 2433
2124 2477
2559 2369
2371 2540
2564 2324
2586 2278
2040 2164
2586 2329
2229 2208
2258 2356
2164 2363
2388 2152
2191 1987
2283 2438
2414 2074
2560 2602
2550 2623
2418 2201
2198 2273
2393 2207
2111 2224
2611 1942
2374 2253
2325 2502
2282 2087
2550 2340
2608 2385
2233 2112
2354 2352
2598 136
2604 2150
2381 2244
1964 2384
2045 2410
2315 2533
2420 2398
2101 2110
2601 2619
2218 1971
2384 2629
2399 1718
1919 2006
1986 2370
2032 2555
2323 2188
2485 1917
2131 2590
2602 2073
2077 1929
2232 2189
2032 1947
2469 2308
2074 2184
2363 2408
2055 2078
2229 2359
2081 2199
2326 2331
1945 1941
2606 2410
2220 2573
2042 2315
2414 2409
2078 2428
2384 2398
2592 2062
2201 2549
1957 2006
2169 2295
2276 1966
2264 2153
2078 2500
2273 2134
1971 2499
2616 2344
2430 2484
2484 2532
2313 1960
2197 2085
2615 2559
2495 2418
1916 1940
2220 2233
2426 2401
1465 2180
2250 2509
1983 2386
2236 2126
2319 2475
2032 2180
2315 2642
2123 2543
2430 2090
2371 2236
2547 2224
2330 1945
2404 2625
2409 2374
2370 2244
2418 2408
2352 2213
2376 2542
2023 2197
2563 2253
2240 2229
2438 2128
2078 2414
2323 2150
1916 2343
2163 2395
2630 2536
1966 1984
2266 2084
1917 2468
2608 2537
2500 2492
2183 2582
2468 2037
2232 2473
2416 2362
2625 2506
2052 2491
2334 1986
1953 2611
2186 2379
2224 2176
2563 2172
2268 2250
2411 2358
2653 2616
1920 1941
2434 2451
2567 2183
2261 2556
2564 2059
1984 2020
2412 2455
2428 2507
2372 2028
2561 2507
2244 2020
2241 2508
2521 1983
1972 1995
2172 2139
2410 2446
2564 1984
1973 2116
2369 2507
2271 2212
2404 2063
1917 2386
2376 2369
2434 2518
2164 2033
2176 2649
2220 2625
2123 2354
2224 136
2471 2010
2507 2478
1957 1995
1915 2156
2093 2300
2198 2138
2328 2544
2115 2040
2418 2477
2117 2144
2064 2201
2410 2077
2032 2038
1940 2319
2404 2140
2047 2453
2659 2341
2024 1914
2438 2399
2037 1993
2417 2232
2154 2409
2349 2207
2394 1959
2559 1917
2033 2484
2218 2123
2144 2187
1964 2038
2140 2395
2328 2567
2068 2081
2068 2419
2561 2559
2118 2550
2491 2509
1465 2333
2368 1926
2607 2477
2484 2464
1987 2133
2420 2458
2136 2261
2592 2191
2340 2074
2115 2078
2325 2010
2461 2292
2384 2176
2386 2559
2331 2213
1962 2430
2340 2290
2123 2005
2469 2240
2146 2405
2133 1926
2045 2607
2559 2550
2277 2335
2510 2042
2216 2340
2049 2371
2516 2268
2537 2062
2128 2603
2103 2520
2180 2039
2619 2055
2007 2047
2600 2619
2121 2150
2504 2334
2242 2298
2104 2140
2495 2123
2210 2543
2384 2390
2085 2152
2467 2654
2268 2588
2319 2062
2420 2191
1954 2087
2416 2047
2087 2508
2148 2007
1920 2191
2257 2638
1938 2339
1919 2202
2578 2624
1917 2300
2241 2509
2099 2199
2250 2125
2413 2116
2592 2315
2128 2148
2433 2484
2339 2446
2467 2381
2309 2271
2083 2590
2088 2561
2593 2046
2172 2109
2607 2504
2282 2617
2619 2521
2642 2246
2071 1994
2353 2563
2640 2346
2047 2057
1918 2005
1941 2327
2551 2073
2516 2111
2384 2135
2655 2275
2325 2196
2385 2420
2190 2430
2463 2196
2598 2294
2101 2568
2033 2069
2583 2365
2573 2190
2557 2199
2368 2138
2398 2279
2216 2564
2485 2551
2547 2180
1940 2180
2549 2073
2187 2054
2480 2133
2002 2642
1983 2189
2196 2279
2275 2043
2553 2586
2446 2561
2140 2206
2404 2244
2305 2191
2427 2037
2354 2561
2029 2540
1966 2030
2025 2061
1997 2073
2602 2462
2078 2573
2210 2611
2616 2289
2304 2608
2559 2059
1962 2086
2149 2132
2296 2367
1465 2102
1925 2271
2604 2646
2145 2133
2372 2057
1981 2053
2144 2543
2416 2155
2328 2198
2414 2271
2567 2002
2216 2477
2242 2182
2261 2575
1971 2604
2069 2352
2329 2165
2356 2112
2331 2077
2279 2582
2477 2495
2629 2642
2132 2052
2300 2206
2643 2199
2607 2554
2116 2009
2445 2215
2213 1943
2278 2414
2259 2232
2354 2244
2107 2047
2186 2425
2154 2188
2141 1923
2061 1931
2212 2604
2332 2127
2507 2543
2131 2290
2003 2642
2616 2127
2474 2277
2291 2256
2624 2492
2623 2482
1947 2243
2267 2285
2109 2485
2112 2485
2132 2169
2414 2218
2498 2475
1942 2631
1926 2597
2591 2088
2231 2440
2153 2268
2352 2575
2593 2073
2007 2508
1985 2323
2210 2556
2220 2376
2590 2266
2199 2032
1947 2588
2593 1953
2428 2299
2549 2381
2187 2496
2607 2090
2127 2196
2451 2191
2549 2098
1962 2108
2542 2418
2471 2629
2384 2081
2446 2404
2031 2612
2509 2224
2140 2600
2059 2630
2104 2043
2520 2387
2282 1947
2292 2194
2063 2329
2477 2607
2458 2451
2491 2398
2020 2266
2122 2604
2122 2409
1941 1945
2268 2174
1979 2299
2371 2488
2521 2078
2011 2006
2148 2347
2492 2428
2361 2448
1955 2254
2200 2624
2022 2365
2392 2275
2331 2069
2602 1925
2638 2154
2007 2138
2648 1919
2187 2267
2037 2446
2072 136
2108 2560
1986 2030
2119 2570
2322 2612
2064 1979
1989 2631
2460 2624
2142 2271
2604 2553
2223 1718
2056 2103
2118 2122
2010 2325
2507 2374
2511 2134
2088 2188
2631 2348
2304 2344
2333 2293
2430 2086
2284 2494
2356 2237
2646 2128
1962 2150
2591 2376
2140 2056
2370 2507
1954 2377
1946 2601
2142 2045
2073 2630
2172 2482
2134 2215
2642 2047
2604 1943
2659 1957
2047 2134
2109 2348
2613 2083
2033 2121
2503 2361
2351 2180
2586 2040
2323 2348
2550 2478
2273 1987
2509 2250
2158 2411
2218 2564
2556 2078
2428 2370
1926 2054
2394 2597
2005 2348
2538 2365
2005 2446
2429 2233
2616 2343
2287 2339
2081 2053
2329 2354
2203 2010
2482 1985
2458 2508
2071 2151
2020 2040
2478 2240
2549 2095
2611 2309
1993 2266
2212 2064
2152 2236
2618 1964
2404 2069
1920 2071
1918 2073
1916 2052
2032 2138
1953 2064
2485 2218
2586 2237
2363 2564
2537 2285
2432 2509
2201 1953
2365 1976
2064 2033
2309 2430
2653 2028
2108 2423
2133 1965
2582 2294
2164 2462
2543 1953
2315 2081
2007 2516
2084 1918
2200 2063
1945 2419
2289 2273
2363 2359
2643 2319
2142 2468
2645 2157
2591 2381
2430 2218
1943 2350
2448 2644
2370 1938
1925 2244
2275 2625
1953 2055
2468 2266
2601 2543
2268 2538
2083 1917
2059 2142
2143 2629
2108 2309
2040 2098
1968 1995
2428 2104
2449 2526
2429 2092
1922 2317
2037 2543
2590 2395
2199 2110
2624 2109
2564 2326
1983 2020
2210 1993
2339 2386
2087 2572
2086 2043
2253 1993
2163 2643
2133 2239
2333 2153
1946 2630
2199 2653
2392 2592
2037 2258
1938 2326
2469 2655
2608 2491
2369 2654
1577 2223
2246 2224
2086 2308
2140 2404
2064 2433
2469 2356
2332 2368
2384 2471
1919 1927
2495 1925
2111 2180
2544 2399
2418 2462
1995 2025
2046 1984
2381 1929
2564 2578
1964 2540
2369 2020
2020 2124
2072 2054
2115 2469
2351 2333
2118 2103
2485 2347
2264 1941
2332 2087
2123 2271
2110 1952
2414 2210
2289 2445
2386 1983
2424 1922
2573 2124
2254 1955
2542 1938
2414 2492
2501 2398
2040 1962
2150 2253
2161 2390
2356 2363
2542 2550
2308 2266
2267 2247
2134 1987
2509 2419
2290 1946
2240 2414
2344 2117
2229 2078
2460 2579
2464 2271
2386 2172
2646 2446
2495 2600
2165 2468
2220 2164
1925 2604
2561 2030
2073 2520
1987 2445
2482 2631
2179 2334
1920 2010
1983 2124
2606 2468
2340 2556
2277 2373
2030 1929
2139 2190
2520 2392
2544 2325
2473 2471
2033 2229
2501 2072
2073 2507
2359 2083
2191 2111
2601 1993
2257 2369
2206 2507
2086 2179
2279 2472
2037 2172
2384 1916
2258 1946
2633 1973
2410 2532
2512 1920
2059 2115
2144 1941
1944 2141
2308 2601
2264 1939
1931 2061
2623 2559
2124 2073
2209 2226
2637 2209
2276 1943
2152 2082
2059 2539
2007 2387
1920 2007
2555 2547
2416 1964
2046 2482
2278 2630
1922 1915
2142 2492
2122 2271
2033 2630
1923 2581
2598 2458
2282 2432
2127 1973
2020 2467
2084 2607
2392 2418
2556 2414
2123 2469
2446 2324
2002 2327
2502 2643
2283 2230
2092 2172
2405 2231
2630 2464
2266 2539
1926 2508
2561 2638
2629 2135
2546 2069
2500 2559
2095 2237
2037 2484
2233 2153
2643 2128
1938 2446
2153 2128
2299 2323
1971 2433
2586 2083
2381 2324
2025 2365
2216 2063
2157 2012
2624 2354
2282 2458
2389 1972
2020 2323
2417 2471
2187 2592
2461 2053
2037 2536
2461 2355
2275 2386
2200 2104
2331 2083
1995 2627
1929 2258
2433 2602
2038 2512
2331 2381
1916 2007
2282 1932
2069 2275
2543 2088
2378 2648
1465 2542
2354 2154
2509 2555
2300 2506
2133 2366
2149 2071
2433 2275
2059 2084
2299 1946
1985 2266
2550 2348
2045 2395
2354 1986
2052 2511
2060 2564
2472 2302
2064 1953
2334 2090
2464 2462
2150 2124
2546 2276
2334 1993
2270 2318
2564 1971
2511 2007
2103 2190
2033 2353
2194 2285
2284 1958
2187 2491
2564 2083
2561 2084
1993 2339
2560 2115
2393 2391
2395 1941
2055 2404
1963 2139
1993 2142
2019 2584
2232 2543
2606 2404
2277 1949
2552 2165
2326 2542
2197 2341
2352 2409
2148 1941
1941 2492
2356 2418
2128 2438
2550 2150
2244 2593
2410 2363
2570 1960
2500 2532
2078 2300
2395 2331
2311 2056
2433 2468
2340 2638
2196 2465
1925 2323
2307 1962
2122 1953
1926 2509
2539 2190
2344 2319
2551 2104
2233 2331
1929 2414
2552 2103
2194 2282
2392 2063
2586 2220
2507 2276
2376 2150
2313 1930
1971 2021
2551 2109
2020 2593
1958 2538
2201 2433
2642 2461
2510 2398
2165 2559
2309 2484
2336 1959
2603 2149
2232 2471
2250 2567
2439 2450
2507 2258
2329 2506
2451 2479
2643 2148
2461 2343
2615 2331
2398 2180
2460 2467
2279 2053
2077 2607
2583 2027
2212 2433
2253 2428
1979 2655
2331 2586
2590 2654
2052 2010
1923 2211
2359 2504
2438 2229
2327 1982
2299 1917
2063 2560
1955 1947
2512 2544
1923 2241
2459 2018
2404 2492
2328 2247
2624 2500
2469 2615
2299 2359
2353 2229
1927 2658
2237 2410
1989 2619
1947 2652
2039 2315
2188 2430
2372 2616
2301 2535
2063 2098
2039 2333
1938 2638
2165 2290
2112 2306
2307 2131
1919 2658
2467 2190
2128 2642
2507 2339
2095 2206
2333 2065
2289 1987
1991 2346
2334 2631
2465 1920
2376 2359
2601 2340
2631 2526
2116 1957
2226 2047
2130 2448
2032 1923
2642 2525
2511 1955
2257 2299
2001 2627
2597 2042
2592 2597
2578 2324
2647 1980
2276 2124
2597 2508
1918 2602
2533 2189
2290 2579
2092 2037
2440 2228
2200 2308
2510 2028
2333 2302
2578 2150
2542 2590
2072 2047
2607 2179
2191 2475
2408 2240
2200 2275
2359 2554
2101 1947
2354 2602
2220 1984
2313 2263
2332 2180
2347 2340
1945 2367
2560 2340
2430 2190
2408 2237
2582 2224
2620 2645
2510 2254
1940 2241
2520 2339
2235 2598
2485 2624
2135 2293
1951 2657
2020 2131
2553 2561
2351 2336
2013 2018
2055 2560
2296 2211
2240 2046
2201 2464
2001 2633
2409 1929
2045 1985
2436 2508
2560 2213
2363 2521
2211 2656
2371 1960
2032 2148
2642 2007
2209 2283
2510 2111
2458 1941
2511 2138
1921 1968
1920 2511
2169 2174
2090 2507
1964 2366
2098 2600
2602 2300
2347 1945
2069 2078
1979 2600
2539 2575
2398 2243
2212 1979
2010 2002
2180 1947
2642 2233
2507 2615
2289 2250
2504 2561
2313 2443
1465 2148
2553 2428
2557 2322
2002 2518
1925 2607
2573 2033
2526 2551
1953 2395
2055 2410
2307 2233
2290 2131
2164 2560
2508 2417
2609 2183
2455 2232
2354 1929
2652 2617
2507 2624
2369 2253
2478 2624
2189 2449
2194 2315
2503 2335
2533 2042
2253 2638
2244 2521
2578 2352
2257 2266
2446 2311
1923 2642
2625 2607
2188 2271
2132 2511
2184 2591
2602 2423
2324 2253
1919 2346
1997 2356
2088 2370
2348 2520
2436 2151
2551 2601
2138 2199
2150 2630
2601 2625
2333 2543
2294 2377
2147 2218
2597 2196
2290 2559
2174 2144
2473 2547
2211 2313
2165 1984
2392 2460
2184 2348
2229 2526
136 2653
2417 1987
2272 2416
2628 1960
1946 1984
2640 2192
2201 2539
2174 2127
2184 2543
2250 136
2093 2601
2122 2218
2551 2433
2118 2586
2478 2059
2495 2374
2556 2172
2591 2240
2594 2101
2624 2418
2045 2601
1941 2282
2471 2582
2124 2309
2376 2563
2552 2118
2112 2064
2485 2590
1948 2475
2558 2431
2002 2029
2279 2555
2273 2102
2602 2206
2279 2102
2529 2530
2367 2068
2629 2283
2543 2319
2246 1948
2148 2028
2196 1994
2056 2600
2284 2447
1984 2552
2500 2561
2200 2504
2362 1923
2556 2142
2429 2601
2430 2030
2308 2139
2214 2256
2590 2381
2140 1993
2511 2394
2401 2259
2560 2460
2433 2381
2047 2208
2601 1943
2190 2095
2037 2104
2498 2143
2363 2030
2206 2229
1984 2352
2551 2210
2240 2604
2176 2343
2081 2241
2160 2659
2078 2271
1986 2404
1980 2014
2602 1997
2246 2226
2326 1983
2564 2307
2498 2592
2581 2565
2653 2510
2024 2284
2573 2347
2050 2018
2607 2460
2354 2521
2071 2451
1940 2295
1943 2142
2585 2097
2307 1946
2028 2176
2030 2323
1926 2649
2601 2108
2144 2511
2282 2196
2585 2364
2354 2468
2283 2445
2464 2354
2561 2216
2047 2038
2468 2142
2029 1981
2308 2615
2573 2363
2052 2087
2192 2626
1916 2087
2516 2283
2202 2378
2331 2363
2084 2469
2395 2121
2264 2537
2229 2077
2590 1985
2133 2616
1935 2000
2274 2132
2630 2142
2433 1918
2543 2315
1968 1931
2037 2553
2512 2143
2142 2526
1993 2560
2139 2200
2142 1986
2087 1916
2574 2630
2586 2504
2521 2104
2488 2361
2216 2244
2082 2397
2103 2549
2464 2095
2432 2603
2560 2200
1971 2492
2638 2300
2236 2107
2384 2267
2363 2354
2278 2103
2586 2121
2007 2419
2485 2354
2594 2429
2143 136
2098 2464
2136 2308
2043 2573
2526 2539
2264 2032
2124 2586
2078 2188
2652 2592
2419 2273
2381 2139
2508 2319
2140 2543
2200 2055
2313 2051
2550 2090
2087 2282
2324 2464
2597 2347
2199 2516
2598 2616
2490 2426
1986 2104
2557 2416
1951 2538
2624 2290
2394 2479
2124 2109
1953 2088
1959 2075
2313 2548
2143 2149
2268 2451
2212 2374
1986 2654
2460 2078
1930 2047
2374 2084
1960 2231
2151 2224
2539 2095
2323 2428
2642 2302
2625 2638
2368 2128
2319 2372
2179 2206
2549 2561
2410 2005
2108 2122
2246 2351
2331 1979
1920 2292
2579 2560
2064 2606
2555 2589
2069 2549
2485 2560
2244 2220
2199 2372
2042 2203
2420 2510
2278 2287
2419 2319
2552 2376
2040 2324
2488 2049
2338 2196
2557 2540
2473 1945
2597 1985
1577 2389
2484 1997
2169 2377
2463 1920
2459 2378
2060 2078
2061 2620
2559 2172
2229 2266
2645 2657
2526 2084
2132 2396
2156 2231
2025 1914
2190 2460
2471 2519
2332 2239
2124 1929
2417 2384
1577 2054
2642 2153
2047 2411
2279 2598
2549 2374
2368 2264
2551 2623
1959 2479
2493 1970
2469 2586
2187 2629
2516 2544
2090 2586
2471 136
1966 2576
2223 2384
2363 2172
2495 2139
2617 1947
2180 2509
2302 1920
136 2153
2593 2257
2434 2344
2594 1988
2430 2520
2154 2546
2032 2398
2511 2332
2133 2313
2391 2213
2364 2159
2381 2237
2657 2659
2024 1927
2367 2085
2059 2543
2463 2508
2074 2578
2074 1943
2619 2433
2189 2508
1963 2462
1966 2090
2611 2387
2467 2093
2589 2180
2028 2199
2092 1982
2123 2213
2484 1986
2655 2409
2564 2020
2039 2543
2473 2406
2446 2615
2408 2200
2464 2093
2376 1986
1926 2036
2098 2586
2190 2381
1993 2638
1993 2104
2386 2240
2607 2030
2037 2601
2347 2518
2351 2149
2586 2590
2282 2472
2414 2590
2445 2649
2655 2654
2275 2331
2499 2121
2338 1932
2512 2266
2127 2400
2318 2425
1929 2218
2446 2507
2267 2529
2039 2273
1983 2078
1919 2657
2649 2191
2002 2194
2055 2590
1943 2433
2620 2447
2244 2467
2324 2590
2648 2024
2112 2615
2532 2266
2131 2563
2353 2172
2460 1979
2469 2275
2444 2650
2415 2396
2137 2468
2213 2563
2306 2220
2123 2391
2240 2646
2551 2334
2045 1979
2343 2247
2286 2440
1938 2542
1941 2559
2482 2064
2499 2276
2608 2028
1941 2369
1985 2512
2253 1966
2623 1983
2020 1917
2577 2317
2547 2268
2324 2485
2138 2332
2429 2007
2394 2282
2131 2331
2030 1989
2115 2240
2275 2539
2459 1951
2138 2372
2326 2619
2196 2215
2145 2637
2184 2625
2212 2121
2309 2631
2482 2331
2240 2309
2026 2081
2554 1918
2543 2125
1984 1925
2559 1929
2194 2149
2257 1984
2183 2292
2348 2069
2200 2077
2081 2102
1917 1963
2416 1944
1941 2590
2070 2091
2229 2271
2084 1993
2165 2123
2296 2133
2198 2133
2498 2319
2646 2468
2074 2655
2381 2615
2304 2327
2187 1941
2507 2275
2024 136
2003 2110
2206 2124
1986 2484
1946 2604
2354 2201
1973 1999
2542 2625
1920 2032
2563 2404
2294 2652
2637 2419
2561 2150
2275 1963
2143 2180
2549 2323
2370 2122
2199 2174
2183 2199
2578 2121
2243 2274
1984 2103
1994 2062
2364 2202
1959 2302
1927 1995
1986 2353
2086 2546
2259 2649
2064 2429
2033 2188
2260 2341
2475 2642
2370 2484
2206 2059
2390 2003
2153 2246
2352 1984
2352 2495
2336 2133
2323 2077
2655 2150
1983 2306
2198 1718
2030 2563
2352 2093
2103 2123
2578 1963
1929 1917
1918 2212
2032 2328
2507 2136
2478 2469
2573 1963
2551 2521
2363 2376
2598 2594
2583 1935
2624 2395
2154 2407
1964 2325
2164 2551
2543 2356
2081 2047
2467 2469
1718 1926
2540 2310
1989 2190
2210 2385
2233 2128
2392 1943
2240 2410
2617 2101
2292 2026
1918 2244
2510 2592
2332 2327
2578 2140
2077 2348
2056 2189
2134 1948
2293 2148
2354 2611
2322 1964
2190 2638
2370 2601
2464 2073
2266 2299
2170 2207
2563 2164
2250 2047
2579 2352
2649 2028
2052 2351
2329 2045
2127 2203
2333 2451
2223 2598
2646 2408
2429 2266
2087 2385
2511 1959
2600 2339
2293 2594
2083 2573
1985 2069
2251 2238
2598 2533
1923 2247
2525 2155
2629 2338
2068 2617
2631 2586
2376 2121
2353 2495
2124 1986
2600 2615
2244 2060
1975 2286
1947 2629
2189 2419
2225 2011
2323 2593
2123 2244
2034 2421
2140 2499
2198 2007
2240 2084
2181 2497
2526 2429
2154 2611
2366 2176
2213 2290
2093 2611
2323 2410
2232 2292
2462 2615
2007 2526
2318 2406
2043 2121
1941 2191
2504 2340
2484 2030
2588 2241
2237 2611
2363 2418
2218 1985
2526 1986
2377 2010
1465 2053
2201 2060
2154 2276
2187 2344
2344 2250
2585 2061
2000 2011
2194 2338
2627 1919
1577 2134
2654 2638
2655 2212
2419 2327
2543 2183
2118 2308
2348 2326
2521 2240
2229 2468
2462 2521
2292 2072
2378 2459
2121 2124
1465 2199
2088 1962
2415 2318
2615 2237
2398 1941
2111 2273
2394 2111
2604 2356
2325 2117
2467 2482
2108 1984
2030 2112
2386 2526
2030 2532
2429 2154
2306 1946
2507 2347
2033 2561
2202 2640
2631 1985
2306 2266
2326 1971
2598 1718
2150 2220
2606 2624
2271 2074
2088 2069
2521 2623
2236 2341
2051 2126
2063 2404
2118 2303
1975 2322
2586 2307
2123 2484
2086 2404
2409 2059
2135 2436
2020 2602
2463 2246
2071 2653
2300 2261
2414 2329
2423 2233
1981 2511
2559 2542
2602 2098
2510 2052
2492 2237
2372 2417
2336 2588
2172 2492
2420 2555
2477 2055
2047 2642
2136 2118
2002 2399
2224 2327
2604 2560
2500 2287
2317 2628
2142 2184
2268 2608
2363 2086
2577 2397
2176 2138
2603 2617
2060 2045
2114 2160
2429 2383
2586 2275
2196 2511
1989 2253
2436 2283
2130 2156
2336 2243
2121 2271
2275 2046
2188 2043
2564 2118
2477 2326
2533 2224
2047 2194
1979 2229
2323 2063
2104 2212
2287 2005
2040 2090
2047 2643
2088 1942
2275 2624
2328 2429
2561 2123
2356 2307
2223 2385
2268 2510
2233 2428
2560 2554
2543 2302
2257 2200
2059 2478
2345 2101
2275 2579
2357 2587
2190 2560
2232 2133
2223 2594
2302 2135
2282 2137
2560 2190
2045 2430
2123 2564
1963 2339
2365 2022
2404 2576
2199 2038
2124 2484
2649 1941
2117 2496
2118 2352
2026 2327
1943 2395
2638 2526
2142 2560
2447 2268
1939 2344
1927 2647
2319 2038
2201 1984
2368 1975
1993 2261
2264 2191
2176 2292
2246 2289
2273 2582
2332 2510
2344 2221
2620 2538
2037 2539
2407 2123
2398 2327
2660 2011
2071 1945
2414 2112
2002 2605
2032 1941
2617 2283
2575 2428
2073 2276
2287 2093
2529 2267
2229 1984
2593 2154
2410 2098
2626 1931
1962 2142
2246 2052
2376 2468
2348 2093
2392 2206
2320 1988
2438 2003
2190 2418
2484 2229
1985 2414
2005 2210
2590 2348
2468 2069
2345 2598
1979 2607
2563 2353
2551 2046
1946 2088
2190 2575
2124 2334
1983 2309
2201 1971
2054 2617
2247 2176
2154 2624
2384 2415
2218 2387
2172 2600
2560 2482
2063 2521
2451 2294
2495 2309
2028 2608
2467 2140
2229 2573
1986 2449
2090 2477
2484 2574
2189 2056
2649 2102
2220 2300
2218 2261
2538 2337
2521 2607
2347 2039
2394 2187
2329 2504
2511 2567
2023 2628
2407 2331
1917 2118
2018 2022
2172 2352
2324 1963
1997 2593
2591 1984
1577 2617
2111 1926
2033 2404
2104 2352
2506 2257
2172 2462
2327 2101
2290 2604
2607 2418
2047 2367
2393 2387
2398 2617
1945 2471
2224 2295
2608 2332
1997 2414
2062 2542
2636 2645
2212 2521
2054 2463
2492 2206
2136 2625
1964 2117
2464 2407
2654 2543
2191 2282
2342 2317
2088 2467
2133 2145
1979 2593
2511 2289
2429 1917
2630 2526
2189 2069
2212 2631
2404 2216
2068 1932
2659 2097
2088 2446
2507 2404
1979 2190
2511 2328
2467 2340
2367 2280
2019 2393
2630 2549
2287 2590
2589 2649
2287 2266
1918 1993
2482 2121
2172 2374
2507 1917
2434 2438
1946 2469
2186 2406
2624 2308
2423 2354
2266 2044
2494 2626
2510 1932
2344 2629
2590 2482
2184 2624
1914 2004
1577 2128
2134 2510
2040 2088
2132 2324
2588 2102
2188 2329
2384 2396
2392 2408
2469 2590
2278 2477
2144 1948
1946 2573
2111 136
2095 2064
2615 2299
2090 2611
2043 2037
2052 2343
2501 2479
2377 2512
2327 2643
2115 2539
2007 2598
2226 1923
1997 2323
1955 2072
2643 2127
2153 2471
2282 2071
2073 2218
2236 2197
2111 2509
2005 2088
2143 2627
2240 1993
2229 2579
2160 2107
2469 1986
2436 2336
136 1945
2342 2236
2340 2115
1980 2009
2032 2127
2140 2340
2007 2247
2047 2366
2086 2290
1959 2135
2287 2074
2169 2198
2534 2335
1959 2465
2279 2072
1950 2014
2050 1998
2299 2575
2529 2102
2338 2543
2331 2446
2007 2053
2005 2258
2144 2445
2351 2274
2386 2404
2310 1964
2122 2278
2140 2464
2059 1979
2165 2369
2312 1913
2174 2138
2556 1929
1925 2172
2005 2276
2199 1970
2031 2525
2424 2659
2655 2172
2124 2433
1955 2643
2184 2020
2492 2356
2063 2229
2104 2339
2574 1985
2436 1941
2588 2344
2659 2197
2003 2453
2425 2296
2286 2049
2303 2189
2149 2498
2253 2414
2387 2303
2408 2045
1926 2205
1465 2042
2464 1938
2233 2543
1938 2275
2573 2414
2068 2305
2415 2603
2464 2229
2139 1984
2395 2543
1962 2615
2218 2278
1962 2069
2077 2578
2072 2183
1925 2559
2660 2447
2084 2404
2075 2328
1954 2328
2254 2071
2461 2642
1973 2494
2429 2302
2347 2468
2289 2582
2189 2472
2418 1962
2620 2061
2625 2408
2359 2578
2643 2223
2660 2648
2561 2356
2047 2180
2398 2338
2446 2088
2555 2028
1913 2116
2153 2351
2233 2307
2181 2587
2092 2607
2391 2189
2268 2134
2266 1946
2084 2261
2207 2478
2116 1995
2282 2032
2108 2604
2002 2010
2384 2531
2407 2370
2184 2108
2088 2630
2507 2593
2345 2296
2629 2246
2372 2279
2095 2543
2619 2326
1914 2647
2465 2180
2556 2233
2257 1971
2112 2154
1965 2474
2500 2020
1935 2647
2418 2602
2055 2037
2391 2478
2543 2542
2103 2056
2218 2040
2408 1929
1929 2020
2104 2060
2423 2271
2236 2360
2184 2278
2525 2603
2399 2007
2324 1962
2414 2005
2190 2229
2033 2611
2490 2170
2501 2434
2593 1925
1980 2159
1962 2418
2172 2430
2612 2296
2199 2053
2183 2149
1953 2257
2322 2226
2268 2533
1993 2607
1940 2163
2276 1983
2244 2326
2033 2340
2597 2351
2223 2282
2510 2283
2498 2368
2543 2040
2588 2273
2129 2644
2309 1938
2619 2410
2069 2083
2239 2242
2164 2428
2196 2102
2590 2190
2468 2326
2482 2088
2612 2038
2299 2625
2188 2546
2511 2191
2299 2414
2151 2509
2605 2224
2339 2118
2304 2438
1966 2306
2520 2655
2273 2047
2492 2244
2007 2198
2241 2629
2165 2150
2561 2363
2020 2414
2467 2200
2352 2083
2340 2240
1917 2078
2275 2526
2104 2073
2355 2413
2364 2297
2364 2447
2020 2600
2340 2395
1946 2306
2510 2267
2532 2428
2352 2590
2315 2589
2109 2611
2006 2202
2210 2619
2246 2475
1929 2410
2164 2278
2563 2464
2573 2550
2560 2477
2123 1929
2271 2334
2495 2410
2547 2199
2329 2593
1985 2307
2353 2088
2140 2308
2395 2556
2184 1941
2305 1987
1993 2586
2154 2306
2319 2529
2191 2302
2598 2511
2370 2033
2300 1983
2597 2032
2015 2357
2138 2617
2543 2649
2598 2471
2417 2394
2028 2347
2329 2154
2053 2282
2223 2028
2408 2409
2640 2001
2200 2381
2520 1971
2430 2271
2261 2095
2624 2430
2625 2578
1951 2004
2233 2136
2624 2579
2460 2326
1938 2428
2020 2118
2551 1929
1963 2369
2189 2292
2313 2047
2078 2331
2492 2090
2306 2278
2202 2626
2103 2623
2377 2436
2611 2064
2232 2211
2634 2421
2520 2601
2587 1933
2142 2542
2539 1946
2032 2102
2310 2603
2155 2048
2551 2600
2047 2641
2475 2026
2433 2500
2625 2539
2131 2467
2143 2543
2102 2183
2150 2123
2420 2196
2102 2116
2254 2398
2260 2197
2573 2299
2253 2324
2526 2063
2392 2326
2039 2111
2095 2299
2140 2356
2139 2229
1987 2332
2391 2067
2560 1917
1959 2498
2124 2220
2330 1955
2125 1945
2463 2241
2039 2279
2038 2226
2412 2317
2369 2123
2118 2542
2118 2593
2328 2529
2184 1929
2659 1919
2469 2347
2045 2586
2408 2504
1993 2258
2132 2377
2273 2250
2376 2142
2104 2103
2319 2649
2428 2112
2117 2609
2190 2030
2060 2075
2489 2507
2602 2108
2282 2511
2464 2290
2491 2394
2093 2467
2028 2582
2271 2561
2090 2376
2331 2240
2218 2482
2253 2556
2627 1999
2273 2643
2507 2084
2461 2151
2061 2011
2170 2486
1943 1984
2351 2325
2593 2356
2616 2283
2553 2408
2028 2294
2287 2410
2492 2229
2518 2377
1971 2630
2391 2234
2020 2469
2611 2278
2261 2037
2485 1963
1983 2495
2102 2328
1948 1718
2240 2086
2386 2206
2626 2657
2370 2184
2475 2246
2370 2136
2419 2642
2630 1984
2037 2271
2253 2542
2056 2078
2404 2201
2376 1971
2123 2408
2095 2045
2410 2381
2206 2468
2575 2150
2625 2033
2381 2591
2244 2590
2103 2218
2428 2172
2133 2310
2184 2579
1920 2250
2229 2069
2429 2071
2200 2067
2261 2590
1916 2143
2586 1986
2229 2520
2162 2405
2451 2038
2005 2543
2212 2323
2086 2326
2641 2610
2040 2073
2295 2582
2227 2263
2592 2491
2070 2236
2169 2643
2645 1991
2567 2215
2601 2556
2229 2556
2559 2579
2370 1985
2213 2542
2370 2542
2109 2033
2417 1945
1917 2266
2547 2338
2232 2455
2037 2404
2031 2117
2143 1577
2063 2430
2381 2121
2604 2131
2020 2348
2190 1943
2112 2559
2188 2098
2150 2121
2180 2351
2237 2559
2460 2573
2302 2642
2077 2095
2347 1918
1932 2189
2446 2306
2104 2340
2369 2069
2630 2131
2409 2550
2654 2140
2546 2354
1979 2115
2563 2504
2594 2174
2532 2590
2072 2649
2469 2184
2613 1983
2582 2509
2240 2122
2083 2500
2084 2229
2069 2020
2220 2086
2123 2311
2112 2561
2154 2142
2579 2093
2029 2282
2149 2509
2467 2121
2095 2340
2193 2316
2324 2109
2492 2058
2467 2429
2592 2026
1983 1979
2042 2582
2347 2554
2510 1465
1976 2013
2653 2087
2567 1948
2325 2047
2230 2358
2446 2409
2591 2607
2261 2339
1979 2078
2507 2030
2506 2576
2098 2078
2543 2593
2140 2142
2600 1989
2536 2043
2560 2290
2624 2553
2468 2253
2142 2179
2046 2591
2510 1987
2176 2543
2409 2654
2610 2289
2609 2555
2323 2046
2347 2271
2639 2000
2607 2123
2451 2592
2410 2359
1985 2392
2065 2333
2402 2614
2154 2370
2339 2638
2268 2598
2499 2449
2475 2555
2117 2042
2154 2309
2112 2468
2117 2138
2233 2381
1971 2299
1985 2404
2246 2111
1948 2279
2370 2307
2278 2631
2561 2275
2056 2506
2542 1925
2216 2520
2190 2623
2504 2030
2590 2069
2492 1946
2032 2054
2471 2588
2512 2333
2058 2073
2108 2369
2477 2408
2478 2526
2002 2637
2273 2196
2306 2233
2218 2069
2504 2088
2482 2484
1984 2275
2278 2560
2575 2037
2510 2189
2468 2045
2593 2573
2266 2223
2543 1925
2425 2270
2501 2075
1966 2165
2448 2317
2368 2501
2244 2172
2449 2499
2593 2331
1942 1925
1993 2464
2553 1943
2224 2143
2489 1946
2600 2386
2153 2510
2126 2105
2359 1962
2625 2433
2412 2126
2334 2387
2653 1955
2030 2539
2604 2334
2257 1966
2447 2027
2302 2544
2410 2556
1986 2553
2231 2313
2359 2593
1954 2009
2261 2409
1917 2324
2619 2210
1939 2399
2376 2290
2006 2225
2490 2398
2574 2109
2624 2220
2609 2597
2510 2007
2018 136
2294 2161
2039 2616
2007 2420
1983 2391
2654 2601
2386 2078
2059 2495
2218 2418
2641 1923
2414 2172
1989 2275
2081 2368
2069 2492
2074 2261
2244 2040
2081 2315
1998 2571
2498 2250
2131 2123
2143 2133
1964 2335
2026 2537
2240 2619
2592 1577
2446 2484
2293 2420
2164 2507
2542 2095
1962 2139
2144 2054
2190 2376
2537 2026
2174 2268
2625 1953
2610 2272
1943 2303
2127 2187
2624 2188
2138 2315
2399 2509
2574 2446
2037 2077
2478 2409
2374 2542
1984 2576
1939 2643
2143 2319
2264 2327
2253 2630
2543 2423
2353 2611
2206 2504
2106 2168
2047 2555
1947 2294
2310 2557
1918 2201
2101 1945
2073 2623
2415 2390
2495 2602
1938 2623
2303 2266
2498 2052
2149 2102
2095 1984
2326 2056
2174 2081
2593 2615
2592 1959
2466 1992
2111 2390
1960 2540
2117 2153
1956 2570
2165 2655
2559 1918
2327 2174
2654 2090
2341 2156
2649 2502
2240 2290
2356 2229
2315 2332
2229 2347
2190 2045
2020 2507
2164 2593
2418 2005
1947 1981
2625 2500
2556 2347
1993 2033
2544 2282
2058 2093
2630 1946
2567 2053
2081 1981
2043 1946
2040 1966
2149 2081
2405 2412
2072 2026
2602 2553
2563 2045
2209 2174
2092 2526
2514 2133
2207 2170
2543 2109
1920 2180
2054 2390
2313 2145
2122 2064
2057 2039
2518 2246
2395 2142
1922 2455
2349 2426
2265 2036
2244 2623
2508 2038
2101 2235
2307 2142
2136 2404
2552 2124
2340 2446
1917 2077
1985 2103
2477 2507
2492 2103
2376 2484
1973 1928
2102 2047
2502 2516
2369 2139
2561 2464
2081 2642
1953 2140
2588 2330
1941 2150
2532 1985
2418 2212
2492 2376
2608 2211
2216 2549
2102 2081
2184 2370
2002 1941
2325 2525
2133 2155
2153 2398
2532 2600
2368 1939
2309 2324
2151 2267
2078 2088
2133 2279
2179 2590
2638 2553
2040 2446
2336 2445
2573 2271
2615 2395
2537 2491
2016 2024
2112 2520
2052 2588
1577 2642
2123 2331
1993 2115
2645 2365
2090 2506
2556 2326
2352 2500
2591 2655
2655 2561
2552 2093
2086 2244
2139 2109
2206 2190
2292 2174
2461 2199
2328 2191
2434 2512
2428 2386
2059 2590
2616 2413
2200 2083
2284 2116
2276 2340
2646 2625
2619 2078
2409 2347
2090 2118
1981 2479
2655 1979
2308 2542
2062 2420
2497 2403
2361 2317
2333 2232
2315 2153
2124 2574
2267 1926
2165 2460
2294 2525
2229 2443
2625 1989
2635 2259
2171 2660
2597 2316
2083 2055
2176 2264
2012 2494
2002 2149
2495 2485
1947 2512
2394 2491
2536 2611
2138 2267
1917 2410
1925 2347
2332 2169
2169 2199
2117 2537
2095 2430
2594 2338
2578 2484
2423 2093
2351 2138
2553 2121
1718 2336
2032 2589
2138 2567
2291 2289
2052 2224
1989 2078
2064 2391
2045 1946
2103 1938
2573 2323
2324 2229
1991 2639
2504 2278
2607 2095
1939 2475
2315 2039
2086 2485
2451 2445
1918 2381
2062 2592
2417 2223
2268 2512
2111 2194
2140 2556
2109 2354
1993 1986
2404 2409
1946 2095
1985 2073
2294 2241
2311 2395
2408 2184
2573 2356
2033 2063
2270 1944
2354 2460
2597 2180
2047 2315
2567 2592
2078 2354
2233 2623
1991 2633
2419 2518
2118 2615
2469 2464
2073 2030
2289 2451
2491 2137
2414 2306
2588 2283
2635 136
1971 2560
2414 2290
2198 2434
1974 2214
2554 2030
2575 2213
2025 2346
2464 2154
2387 2234
2363 2559
2564 2218
2419 2292
2011 2472
1983 2356
1981 2101
2062 2509
2374 2655
2022 2225
2201 2136
2471 2198
2344 2355
2039 2292
1938 2574
2328 2396
2351 2398
2532 2423
2201 2638
2519 2598
2631 2103
2290 2190
2631 2340
2136 2220
2183 2127
2122 2139
2590 2485
2419 2111
2125 2151
2069 2189
2030 2489
2163 1970
2600 2069
2140 2654
2097 2659
2032 2302
2418 2220
2542 2655
2649 2054
2115 2220
2084 2108
2395 2218
2573 2593
2192 2022
2237 2601
2173 2405
2576 2611
2112 2543
1921 2620
2386 2615
2243 2451
1991 2004
2451 2134
2220 2299
2423 1983
2488 2236
2549 2090
1979 2064
2067 2428
2520 2233
2154 1917
2064 2551
1936 2562
2237 2184
2037 2266
2331 2590
1954 2176
2103 2233
2508 2161
2370 2108
2062 2327
2603 2235
2419 2002
2109 2477
2472 2597
2043 2201
2140 2095
1997 2560
2573 2630
2148 2461
2093 2607
2478 2623
2266 2561
1945 2592
2112 2045
1938 2492
2244 2542
2464 1984
2384 2501
2277 2038
2131 2334
2092 2271
2607 2507
2553 2123
2352 2140
2623 2611
2550 2607
2611 2578
2154 2299
136 2171
2575 2646
2026 2367
1914 2636
1994 1941
2433 2428
2586 1946
2370 2564
2624 2468
2384 2279
2047 2224
2007 2398
2128 2163
2093 2271
2083 2340
1718 2512
2566 2345
2334 2489
2319 2283
2266 2306
2333 2537
1981 2652
1945 2283
2655 2619
2617 2336
2423 2074
2138 2194
2108 2190
2224 2502
2356 2030
2112 2611
2037 2591
2209 2031
2081 2187
2367 2127
2060 2108
2086 2118
2500 1925
1935 2022
2228 2342
2519 2224
2471 2328
2187 2642
2511 2537
2299 2093
1932 2351
2077 2550
2546 2088
1951 2284
2394 2333
2600 2409
2521 2600
2594 2125
2184 2275
2640 2365
2069 2347
2461 2087
1917 2121
2007 1947
2213 2339
2346 2018
2376 1929
2507 2086
1913 2312
2468 2646
2095 2559
2369 2348
2406 2612
2647 1999
2625 2326
1966 2033
2461 1970
2229 2210
2617 1941
2464 2556
2095 2485
2292 2338
1920 2512
2372 2598
2410 2240
1993 2334
2543 2430
2494 1991
1971 2369
2243 2081
2257 2184
2370 2300
2468 2553
2324 2131
2032 2174
2164 2624
2187 2194
2090 2370
2510 2247
1997 2123
2616 2351
2326 2654
2448 2540
2138 2279
2478 1941
2198 2319
2610 2211
2518 1945
2059 2233
2556 2374
2575 2553
2304 2461
2521 2118
2645 2639
2564 2369
2259 2087
2369 2084
2064 2573
2115 2607
2553 2200
2206 2118
2338 2328
1918 2220
2546 2329
2037 2489
1979 2410
2383 2429
2489 2543
2043 2492
1958 2494
2261 2084
2302 2134
2384 2087
2038 2511
2169 2010
2463 2007
1947 2010
2340 2200
2095 2244
2491 2132
2111 2101
1983 2092
2364 2657
2374 2631
2187 2282
2433 1943
2229 2090
2520 2410
2077 2278
2408 2638
1981 2054
2393 2266
2095 2131
2006 1931
2273 1923
2367 2232
2506 2266
2037 2423
2559 2601
2139 2467
2334 2056
2585 1954
2028 2117
2302 2463
2285 2071
2366 2226
1943 2376
2095 2073
2156 2659
2468 2506
2213 2409
2560 2037
2246 2153
2235 2384
2132 2501
2123 2220
2078 2074
2574 2139
2653 2194
2354 2045
1985 2602
2403 2047
2020 2354
1983 2370
2624 1983
2346 2389
2060 2083
2222 2479
2081 1970
2554 2309
2551 2575
2029 2298
2615 2334
2415 2344
2004 2027
1952 2003
2600 2559
2384 2180
2224 2512
1989 2615
2629 2224
2160 2126
2037 2078
2578 2556
2071 2138
2039 2138
2103 2033
2627 1991
2560 2550
2237 2233
2492 2646
2102 2111
1913 2529
1963 2064
2097 1935
1954 1972
2372 2327
2315 2384
1971 2485
1951 2225
2292 2555
2396 1926
2461 2511
2308 2590
2601 2369
2306 2560
1918 1983
2652 2132
2354 2578
1928 1972
2299 2392
2479 2282
2266 1966
2278 2539
2625 2331
2349 1992
2559 2499
2121 1984
2058 1983
2526 2395
2287 2542
2179 2142
2408 1971
2240 2554
2592 2039
2271 2257
2347 1926
2539 2407
2615 2339
2608 2133
2237 2600
2020 2005
2307 1986
2376 2504
2561 2090
2555 2368
2555 2250
2643 2295
2409 2549
2196 2081
2473 2267
2609 2187
2200 2631
2323 1943
2112 2257
2307 2564
2646 1938
2194 1932
2045 2374
2032 2343
2501 2110
1959 2285
2547 2336
2600 2060
2030 2103
2423 2237
1970 2325
1993 2331
2495 2086
2276 2084
2250 2279
2053 2594
2040 2600
1465 2054
2294 2264
2479 2274
2369 2573
2609 2282
2125 2510
2108 2386
2509 2062
2479 2396
2040 2299
2121 2240
2169 2072
2188 2037
2150 2409
2630 2005
2315 1577
2118 2216
2084 2484
2414 2139
2237 2331
1946 2446
2356 1971
2218 2602
2575 2300
2104 2370
2542 2200
2237 2118
2102 2187
2485 2115
2003 2327
2218 2460
1989 2122
2373 2361
2267 2377
2347 2604
2462 2229
2133 2398
2348 2021
2511 1926
2526 2352
2081 2065
2183 2241
2549 2467
2404 2323
2190 2326
2082 2371
2384 2101
1943 2578
2433 2590
2348 2307
2629 2102
2567 2102
2593 2611
1966 2428
2198 2264
2212 2526
2395 2624
2306 2309
2414 2240
2654 1986
2086 2348
2592 1955
2103 2590
2597 2473
2278 2446
2629 2333
1970 2183
2180 2508
2042 2133
2520 2033
2223 2191
2395 2619
2533 2649
2235 2243
2542 2278
2654 2489
2118 2064
2009 2435
2216 2404
1918 2339
2616 2589
2328 2203
2624 2353
2250 1940
2308 2492
2511 2592
2068 2338
2344 2196
2593 2638
2073 2005
2630 2559
1955 2616
2095 2600
2112 2216
2201 2573
2415 2235
2123 2154
2159 2284
2111 2511
2399 1945
2607 2340
2417 2372
2607 2326
2610 2182
2323 2339
2072 2434
2077 2309
2244 2484
2309 2331
2271 2104
2299 2218
2443 2313
2021 2485
2339 2428
2601 2074
2484 2308
2611 2623
2550 2088
2088 2190
2060 2370
1945 2010
2446 1929
2526 2007
1920 2087
2625 1946
2482 2359
2303 1942
2172 2604
2104 2625
2474 2314
2507 2020
2354 2118
1962 2551
2624 2154
2176 2416
1929 2520
2138 2111
2567 2543
2592 2451
2638 2123
2046 2600
2574 2590
2559 2005
2354 2369
2292 2533
2078 2591
2326 2586
2261 2352
1999 1935
2526 2308
2210 1962
2579 2056
2328 2026
1953 2103
2495 2271
2648 2284
2134 2588
2123 2266
2332 2053
2648 2645
2334 2655
2032 2187
2588 2598
2592 2471
2329 1993
2157 2027
2206 1917
2046 2123
2567 2653
2391 2331
2250 2191
2586 2348
2257 2331
2151 2054
2408 2468
2142 2112
1941 2194
2118 1925
2407 2324
2102 2419
2460 2428
2224 2047
2615 2414
2498 2289
2112 2506
2046 2233
1938 2233
2172 2033
2037 2216
2069 2108
2348 2590
1577 2498
2500 2154
2244 2073
2590 2324
2002 2026
2526 2266
2093 2410
2060 2630
1963 2601
2003 2161
2150 2560
1918 2056
2423 1971
2586 2046
1970 2652
2233 2210
1971 2532
2283 1577
1983 2506
2078 2109
2447 2202
2533 2555
2068 2026
2109 2586
2313 2107
2273 2081
2020 2631
2573 2446
1917 2460
2044 1983
1946 2103
2601 2469
2629 2183
2560 1925
2387 2262
2037 2020
2212 1993
2292 1926
2276 2409
2117 2328
2315 2491
2083 2084
2210 2354
2600 2037
1962 1917
2155 2608
2124 2414
2174 2419
2468 2212
2594 2293
2391 2123
2611 2058
2408 2266
2344 2419
2485 2352
2307 1966
2464 2559
2054 2498
2534 2286
2059 2278
2619 2030
2201 2266
2436 2377
2635 2533
2471 2351
1936 2049
2394 2652
2366 2232
2232 2205
2060 2201
2104 2391
2582 2151
2307 2139
2060 2163
2606 2206
2346 2365
2417 2047
1931 1914
2247 1941
2526 2387
2468 2560
2149 1945
1964 1926
2112 1946
2658 2061
2575 2005
2254 2319
1926 2211
2022 2011
2414 2073
1935 1995
2495 2386
2292 2343
2206 2040
2199 1940
2331 2190
2384 2215
2567 2336
2206 2083
2137 2042
2077 2625
2128 2616
2520 2549
2308 2331
2385 2445
2624 2374
2220 2033
2606 1986
136 2081
2625 2074
2201 2308
2033 2507
2408 2414
2109 2309
2334 2526
2500 2278
2090 2654
2266 2374
2491 2155
2030 2347
2592 2366
2150 2526
2603 2415
1951 1927
2532 2069
2247 2336
2561 2352
2385 1987
2078 2139
2381 2299
2635 2148
2459 136
2283 2328
2329 2240
1955 2247
2613 2590
2381 2464
2132 2292
2590 2092
2093 2033
2300 2482
2634 2041
2078 2083
2550 2553
2183 2509
2005 2404
2078 2630
2206 2520
2213 2275
2649 2161
1916 2294
2154 2604
2542 2556
2365 1995
1997 2506
2283 2529
1954 2116
2416 2272
2472 2169
2007 2086
2624 2210
2570 2129
2266 2311
2174 2249
2372 2582
2447 2097
2131 2306
2052 2099
2289 2176
2101 2436
2306 2624
2477 2037
2414 2300
1938 2392
2485 2323
2142 2469
2463 2529
2510 2143
1959 2138
2630 2088
2202 2633
2233 2229
2623 2489
2026 2608
2040 2108
1942 2234
1953 2104
2598 2417
2611 2376
2631 2564
2125 2533
2359 1938
2210 2423
2250 2199
2276 2059
1948 2333
2412 2173
2340 2484
2327 1947
2521 1966
1958 2640
2112 1962
2033 1938
2021 2409
2650 2426
2336 2653
1936 2534
1971 2201
2607 2108
1986 2043
2193 2023
2392 2352
2347 2315
2131 2083
1970 2399
2652 2390
2206 2334
2369 2021
2623 2103
2124 1925
2087 2302
1927 2659
2253 2309
2434 2068
2266 1938
2090 2607
2071 2302
2575 2229
2340 2088
2231 2577
2275 2084
2392 2240
2381 1941
2617 2111
1918 2340
2268 2327
2574 2069
2619 2625
2447 2192
2027 2284
2064 2206
2606 2276
2135 2117
2471 1954
2473 2396
2627 1972
2364 2346
2602 2404
2554 2404
2586 2359
2042 1465
2127 2071
2268 2087
1938 1997
2594 1941
2188 2074
2201 2560
2068 2072
2535 2301
2164 2165
2274 2351
2646 2354
2482 2046
2374 2275
2090 2045
2394 2267
2084 2391
2266 2512
1951 2435
2411 2286
2032 2199
2283 2472
1959 1926
2365 2297
2607 2084
2189 1926
2206 2392
2206 2306
2157 2000
1984 2550
2602 2331
1946 2020
2206 2108
2386 2275
2610 2155
2201 2381
2329 2613
2300 1941
2420 2292
2498 2247
2279 2254
1941 2090
2492 2549
2504 2329
2117 2377
2289 2072
1718 1465
2058 2244
2078 2526
2371 2618
2108 2500
2020 2578
2347 2189
2294 2508
2083 2033
2381 2607
2273 2143
2139 2590
2206 2655
2655 1963
2370 2083
2200 2607
2644 2129
2543 1989
2600 2446
2040 1946
2226 2304
2554 2428
2229 2410
2586 2339
2333 2327
2087 1987
2339 2124
2229 2559
2589 2169
1998 2585
2162 2313
2283 2235
2521 2575
2309 1941
2598 2282
2425 2292
1465 2567
2357 1937
2011 2627
2636 2284
2161 2509
2237 2020
2038 2039
2189 2463
2104 2142
1964 2133
2087 2068
1918 2638
2161 2062
1966 2560
2560 2520
1918 2308
2121 2059
2244 2464
2093 1997
1918 2623
2307 2579
2087 2372
2423 2229
2028 1940
1926 2491
2602 2593
2607 2074
2118 2172
2189 2285
2111 2081
2396 2327
2460 2604
2328 2169
2359 2118
1929 2309
2088 2573
2253 2122
1962 2586
2081 2223
2074 2112
1997 2257
2498 2127
2209 2480
2553 2059
2135 2038
2464 2554
2408 2077
2363 2575
2138 2458
2526 2560
2226 2416
2136 2122
2139 2484
2088 2306
2149 1959
2122 2123
2068 2328
2338 1994
2039 2127
2026 2384
2433 2507
1971 2429
2624 2214
2126 2317
2619 1989
2131 2084
2559 2046
2418 2326
2629 2377
2194 2351
2406 1926
2458 2038
2078 2055
2564 1966
1916 2183
2060 2005
2313 2160
2151 2071
2240 2507
2425 1923
1984 2482
2045 2359
1986 2261
1966 2326
2043 2131
2240 2467
2271 2083
2139 2492
2279 2463
2150 2593
2174 2508
2294 2509
2282 2384
2554 2467
2018 2159
2347 2040
1941 2619
2116 2459
1941 2428
2471 2133
2418 2131
2138 2436
2062 2479
2131 2469
2500 2521
2322 2361
2072 2390
2333 1985
2226 2510
2408 2655
2142 2323
2386 2625
1959 2134
2315 2032
2290 1997
1917 2423
1970 2002
2261 2064
2389 2531
2095 2354
2463 2328
2237 2058
2289 2010
2037 2326
2409 2058
2615 2359
2579 2546
2142 1918
2023 1960
2364 2648
2554 2352
2326 2504
2188 2139
2188 1985
2354 2309
2615 2600
2283 2068
2275 1925
1982 2443
2372 2194
2384 2222
2278 2201
2404 2172
2469 1918
2088 2084
2491 2180
2037 1929
2142 2122
2072 2338
2582 2328
2381 2069
2140 2329
2334 2150
2180 2332
2329 2276
2218 2142
2475 2102
2189 2234
1933 2126
1919 2626
2428 2033
2619 2165
2336 2597
2059 2056
2257 2190
2581 2029
2451 2254
1939 1920
2623 2037
2103 2323
2491 2347
2582 2127
2592 2465
2169 2042
2184 2216
2171 2159
2368 2183
1929 2536
2121 2088
2520 2615
2464 2520
2244 2088
1986 2549
2590 2560
2433 2140
2600 2407
2525 1964
2398 2451
2112 2492
2194 2071
1970 2555
2196 2294
1935 2633
1985 2104
1948 2567
2624 2083
2117 2126
2539 2600
2005 2323
2567 2617
2115 2575
2616 1955
2172 2331
1929 2392
2464 2237
2333 2652
2573 2309
2559 2154
2618 2317
2242 2060
2327 2183
2543 2451
1971 1962
2203 2589
2212 2462
2512 2560
2539 2484
2554 2140
2597 1577
2003 1981
2223 2087
2323 2088
2098 2206
2064 2369
2149 2031
2623 2551
2433 2037
2083 2359
2131 2253
2546 2131
2354 2586
2266 2476
2282 2544
2520 1929
2153 2135
2485 2495
2582 2343
2659 2346
2326 2109
2509 1465
2360 2488
2343 2629
1985 2240
2328 2003
1958 1919
2007 2372
2369 2131
2352 2532
2154 1929
1940 2176
2602 2131
2485 2369
2495 2539
2069 2467
2334 2410
2032 1718
2283 2038
2606 2600
2124 2561
2048 2287
2024 1958
2314 2474
2070 1960
2198 2185
2462 2323
2366 2336
2221 2101
1979 2233
2090 2103
2115 1979
2102 2519
2201 2118
2347 2196
2308 2354
2040 2559
2117 2610
2149 2052
2561 2201
2250 2555
2532 2139
1979 2123
2617 2149
2306 2275
2423 1962
2468 2095
2108 2059
2323 2590
2356 2340
2154 2430
2492 2261
2258 2507
2412 2570
2201 2233
2601 2287
2118 2200
2125 2187
2601 2218
2047 2246
2327 2279
2497 2534
2348 1984
2649 2588
2349 2650
2109 2064
2007 2543
2606 2331
2117 2264
2395 2139
2233 2104
2064 2112
2324 2060
2589 2372
1986 2469
2073 2290
1984 2229
2020 2604
2408 2229
2399 2169
2000 1935
2307 2573
2115 2359
2550 2026
2469 2500
2567 2071
1945 2463
2053 2351
2259 2336
2415 2617
2247 2537
2417 2571
2533 2315
2506 2500
2394 2589
2308 2655
2156 2587
2043 2467
2199 2491
2188 2257
2057 2508
2319 2135
2125 2471
1985 2065
2188 2164
2093 2578
2430 2347
2069 2139
2021 2348
2028 2567
2047 2065
2418 1946
2484 2526
2655 2093
2093 2401
2458 2396
1972 2658
2471 2292
2254 2471
2658 2459
2611 2323
1966 2404
2655 1985
2276 1986
2074 2482
2344 2333
1918 2495
2333 1948
2253 2484
2583 1958
2000 1951
2244 2340
2381 2261
2510 2224
2600 2220
2338 2351
2463 2133
2001 2447
2243 2394
2169 2344
2430 2150
2064 2350
1960 2523
2331 2033
2451 2543
2419 2268
2660 2364
2354 2477
2133 2589
2507 2428
2103 2524
2497 1933
2120 2129
2379 2280
2164 2108
2501 2537
2504 2354
1577 2180
1980 2006
2133 2592
2127 2189
2279 2434
2409 2615
2492 1979
2584 2387
1943 2165
2023 2047
2613 2602
2154 2108
2133 2394
1951 1921
2391 2206
2335 2286
2406 1923
2203 2072
2318 2651
2254 2509
2579 2495
2103 2504
2289 2509
2623 2045
2078 2655
1917 2591
2266 2611
2484 2172
2597 2319
2517 2031
2482 2369
1927 1935
2188 2206
2509 2153
2007 2302
2078 1984
2307 2625
2143 1959
2135 2347
1925 2615
2192 2620
2030 2340
1985 2309
2183 2293
2630 2165
1940 2315
1973 1931
2188 2103
2139 1966
2040 2573
1994 2629
2326 2184
2176 2196
2119 2371
2550 2622
2309 2409
2151 2292
2140 1953
2376 2188
1933 2497
2143 2292
2283 1465
2586 2240
1993 2564
2448 2035
2289 2498
2363 2164
2276 2395
2203 2032
1957 2061
2216 2229
1931 2024
2529 2384
2047 1985
2507 2590
2083 2418
2347 2575
2320 2255
2204 2034
2060 2611
2236 2342
2224 2194
2333 2419
2139 2395
2500 2433
2224 2153
2132 2415
2196 2039
2139 2477
2145 2211
2088 2410
1968 2447
1962 2356
1917 2237
2547 1465
2624 2556
2511 2068
1914 1935
1962 2103
2475 2436
2299 2090
2521 2586
2250 1577
2606 2244
2109 2306
1922 2424
2150 2329
2495 1963
2607 2115
1985 2081
2516 2598
2118 1943
2414 2276
2206 2606
2376 2313
2349 2490
2133 2144
2305 2336
2257 2630
2124 1918
2578 2654
2117 2491
2479 2128
2428 2348
1929 2206
2553 2602
2103 2654
2200 2521
2507 2352
2069 2591
1963 2500
2559 1938
2184 2078
2537 2221
2592 2643
2090 2220
2582 2289
2064 2625
2655 2354
2539 2275
2489 2123
2467 1943
2351 2319
2250 2511
2200 2240
1937 2015
2063 2392
2220 1993
2646 2410
2624 2469
1954 2508
1920 2399
2468 2469
2386 2410
2590 2323
2553 2359
1918 2276
2340 2428
2601 2430
2644 2236
2059 2433
2384 2132
2363 2109
2018 2472
2381 2033
2329 1983
2172 1993
2196 2555
2131 2005
2114 1965
2145 2080
2216 2359
2377 1954
2125 2461
2593 2504
2435 1914
2616 2144
2090 2059
2330 2289
2300 2112
2261 2078
2347 2191
2645 2459
2624 1929
2224 2629
1935 2538
2654 2428
2611 2564
2428 2287
2386 2477
2000 2284
2210 2103
2006 2001
2140 2184
2249 2313
2602 1984
2410 2055
2282 2235
2223 1577
2247 2327
2446 2206
1971 1993
2326 2363
1959 2149
2075 2617
1920 2247
2428 1971
2463 2643
2591 2074
2161 2292
1979 2381
2021 1971
2046 2088
2300 2449
1986 1979
2543 2135
2369 2359
1994 1985
2355 1913
2171 2050
1930 2117
2328 2071
2109 1997
2410 2477
2082 2035
2323 2409
2075 2438
2306 2188
2601 1918
2299 2549
2561 2654
2323 2216
2050 2337
2356 2104
1971 2556
1922 2587
1938 2212
2246 2463
2560 2122
2287 2485
2136 2172
1962 2122
2363 2309
2151 2629
2118 2369
1947 2280
2040 2553
2374 1917
2221 2111
2274 1939
2619 2077
2140 2532
2212 2468
2098 2543
2104 2287
1958 1927
1927 2459
2128 2533
2285 2510
2631 2449
2088 2142
2546 2172
2302 2338
2511 2451
1465 2543
2655 2206
2172 2237
2409 2323
1918 2098
2306 1971
2398 2597
2032 2498
2275 2201
2223 2491
2469 1938
2086 2266
2446 2055
2477 2095
2560 2323
2200 2506
2289 1926
2554 2484
2104 2408
2023 1964
2150 2478
2299 2140
1958 2647
1926 2417
2223 2057
2328 2235
2042 2653
2071 2598
1980 2657
2244 2165
2417 1577
2420 2039
2247 2343
2307 2348
2271 2043
2516 2629
2414 1979
2042 2642
2087 2128
2508 2589
1923 2174
2542 2356
2004 2626
2319 2132
2084 2507
2257 2520
1943 2504
1960 1964
2159 2192
2399 2132
2136 2124
2492 1984
2105 2360
2494 1951
2200 2404
2237 1938
2454 2387
2201 2108
2073 2139
2229 1983
2059 1966
2489 2542
2132 2273
2536 2276
2073 2559
2030 2218
2546 2064
2297 1927
2033 2348
2428 2237
2180 2588
2121 2118
2005 1918
2385 1920
2118 2532
2323 2142
2032 2436
2055 2329
2308 1917
2063 2352
2462 2118
2046 1986
2063 2409
2189 2319
2591 2299
2376 2500
2556 2392
2250 2491
2189 2372
1971 1929
2657 2159
2253 2306
2603 2072
2440 2089
2307 2601
2324 2611
2194 2187
2007 2325
2250 2189
2045 1925
2203 2111
2588 1916
2526 2067
2188 1938
1971 2240
2543 2582
2611 2108
2138 2203
2319 2498
1977 2256
2304 2516
2111 1959
2135 2068
2062 1985
2115 2033
2236 2105
2507 2124
2139 2210
2099 2358
2404 1971
2617 2394
2187 2117
2280 2617
2042 2148
2089 2228
2124 2559
2255 2076
1917 2184
2060 1986
2350 2092
2199 1947
2469 2507
2153 2463
2086 2093
2625 2460
2190 2554
2553 2418
2637 2557
2154 2213
2128 1920
2594 1926
2110 2003
2586 2625
2188 2604
2623 2638
2343 2174
2552 2109
1997 2590
2368 1932
1941 2461
2547 2597
2083 2201
2187 2087
2526 2218
2653 2180
2363 2206
2381 2103
2056 2499
2507 2115
1953 2046
1955 2125
2279 2127
2098 2020
2364 2012
2554 2220
1938 2118
2598 2111
2069 2501
2266 2359
1971 2271
2602 2467
2033 1962
2504 2430
1941 2578
2293 2333
2629 2597
1954 2289
2230 2099
2150 1983
2471 2223
1995 1980
2048 2233
2603 2416
2629 2516
2139 2433
2299 2056
2507 1941
2159 2620
2353 2104
2292 2191
2331 2430
1945 2458
2238 2341
2095 2083
1918 2507
1968 2001
2623 2165
2127 1913
2190 2266
2030 2150
2267 2151
2266 2043
2240 2506
2615 2467
2649 2491
2536 2619
2029 2452
1983 1925
2326 2482
2326 2244
2081 2629
2045 2095
1923 2416
2093 2309
2053 2117
2494 2364
2446 2309
2573 1966
2040 2623
1973 2159
2629 2372
2081 2609
2235 2396
2218 2271
2422 2217
2555 2039
2460 2532
1986 2213
2047 2149
2235 2274
2112 1966
2624 2507
2526 2115
2372 2555
2592 2333
2078 1925
2240 2359
2056 1997
2409 2093
2027 1951
2166 1960
2290 2574
2642 2328
2339 2655
2363 2492
1953 2323
2387 2243
2404 2423
2646 2172
2469 2551
2078 2575
2326 2347
2506 2033
2046 2552
2309 2063
2502 2544
2630 2253
2551 2573
2098 2033
2182 2610
2261 2109
2414 1986
2206 2216
2374 2123
2283 2543
2461 2608
2071 2247
2003 2243
2124 2654
2347 2369
2484 2340
1918 1938
2554 2188
2095 2369
2102 2189
2558 2263
2007 2267
2384 2491
2154 2033
2047 2325
2575 2446
2598 2394
2615 2340
1923 2270
2630 2140
2372 2149
2500 2290
2593 2352
2102 2642
2165 2340
2132 2003
2611 2220
1947 1916
2327 2461
2104 2069
2241 2282
2354 2040
2372 2135
2508 2511
2582 2153
2492 2446
1987 2223
2216 1971
2602 2552
2190 2520
1983 2334
2579 2142
2347 2135
2469 2271
2339 2604
2407 2446
2590 2506
2142 1942
2045 2590
2203 1954
2203 2239
2432 2272
2007 1941
1970 2054
2084 2112
2299 2139
1939 2608
2335 1936
2289 2610
2125 2295
2616 2028
2428 2086
2050 2378
2309 2045
2407 2086
2331 2391
2138 2054
2361 2313
2326 2266
2478 2147
2518 2266
2037 2234
2199 2543
1941 2567
2475 2226
2075 2062
1941 2623
2498 2273
2403 2173
2296 2047
2445 2598
2059 2261
2110 1981
2518 2347
2500 1938
2643 2273
2030 2404
2509 2458
2216 2123
1957 2225
2655 1938
2339 2526
2332 2351
2507 2579
2475 1923
2411 2497
2414 2359
2468 2300
2074 2573
2492 2309
2508 2250
1980 2027
2039 2087
2613 2056
2372 2537
1939 2110
2300 2056
2151 2461
2116 2337
2611 2290
2507 2271
1993 2308
2586 2418
2475 2028
2042 1916
2410 2112
2088 2290
2646 2122
2271 2619
2372 2289
1971 2037
2537 2333
2488 2146
2394 2344
2527 2483
2084 2069
2472 2191
2233 2408
2237 2369
2046 1979
2052 2132
2327 2555
2123 2556
2646 2600
2658 2346
2021 2604
2429 2563
2054 2589
2184 2574
2657 2627
2344 2394
1968 2009
2308 2428
2504 2084
2390 2415
2464 2020
2333 2133
2507 2429
2606 2526
2410 2604
1945 2259
2356 2206
2000 2171
2118 2601
2607 2058
2537 2087
2607 1929
1917 2055
2171 2365
2062 2537
2078 2485
1964 1960
2603 2052
1918 2560
2225 1951
2419 1940
2064 2507
2410 2329
2154 2482
2037 2220
2561 2271
2045 2324
2047 2497
2133 1947
2027 2639
2506 2601
2542 1465
2154 2578
2561 2212
2543 2266
2430 2299
2404 2136
2616 2039
2179 1971
2477 2638
2087 2148
2125 2148
2161 2111
2183 2475
2564 2253
2223 2224
2656 1965
2333 2432
2278 2020
2603 2110
2327 2479
2273 2616
2324 2619
2423 2654
2428 2142
2328 2338
2624 2098
1986 2307
2171 2001
2188 2576
2571 2394
1948 2250
2171 1998
2336 2451
2118 2090
2331 2495
2549 2410
2343 2384
2598 2332
2115 2433
2253 2300
2000 2645
2150 2033
2286 2335
2447 2620
2549 2359
2073 2108
2123 2560
2604 2326
2588 2039
2174 2148
2098 2140
2555 2338
1927 2620
2098 2404
2117 2148
2399 2294
2150 2655
2184 2093
2601 2122
2623 2257
2098 2578
2476 2584
2086 2131
2103 1917
2406 2610
2111 2243
2463 2336
2557 2176
2152 2231
2487 1956
2046 2363
2475 1940
2475 2169
2217 2548
2040 2208
2083 2506
2356 1918
2543 2201
2158 1975
2511 2543
1948 2052
2619 2108
2046 2218
1925 2206
2625 2521
2052 2128
2616 2007
2047 2594
2315 2111
2220 2546
2000 1958
2039 1941
2532 2348
1917 2655
2068 2117
2536 2206
2600 2200
1920 2042
2122 2142
2151 2471
2089 2628
2196 2183
2097 2640
2142 2253
2323 2464
1952 2296
2118 2063
2433 2266
2004 2640
2484 2564
2164 2098
2623 2543
2533 2465
2267 2302
2343 2294
2512 2087
2356 2430
1973 1995
2240 2201
2274 1959
2261 2500
2461 2629
2348 2386
2641 2416
2471 2117
1948 2273
1923 2603
2264 2039
2244 2506
2045 1993
2655 2056
2206 2369
2601 2095
2150 2261
2188 2386
2088 2123
1963 2646
2059 1985
2516 2649
2404 2638
2108 2300
2579 1918
2340 2607
2354 2646
2039 2508
2090 2352
2068 2344
1938 2074
1985 2468
2046 2578
2430 2093
2509 2052
2368 2054
2241 2279
2589 2327
2347 2507
2607 2374
2620 1928
2220 1971
1918 2655
2294 2333
2654 2253
2649 2510
2260 2105
2107 2146
2559 2326
2482 2172
2139 2520
2248 2173
2469 2103
2542 2299
2032 2649
2297 2006
2319 2333
2482 2550
2495 1993
2642 1941
1917 2551
2161 2475
2026 2498
2112 2086
2542 2601
2139 2551
2284 2202
2091 2023
2408 2220
2573 1984
1998 2627
2189 2417
2490 2444
2117 1923
2188 2552
2649 2224
2361 2023
2326 1917
2328 2274
2484 2539
2072 2377
2350 2288
1966 2387
2124 2543
1941 2600
2407 2500
2398 2445
1914 1972
2294 2180
2294 2283
1983 2059
2521 2258
2225 2284
2142 2654
2281 2487
1979 1929
2520 2084
2048 2292
2531 2400
2073 2492
2101 1959
1965 2322
2512 2028
2290 2139
2611 2561
2374 1986
2384 2282
1983 1984
2467 2124
2619 2460
2300 2354
2268 2378
2323 2073
2637 2425
2567 1465
2031 2138
2601 2395
2557 2133
2408 2109
2172 2520
2062 2451
2116 2639
2254 2102
2053 2479
2188 1997
2647 2659
2637 2242
2507 2046
2276 2573
1985 2408
2482 2604
2607 2299
2159 2346
2414 2482
2511 2144
2335 1964
2347 2184
2392 2184
2131 2561
2642 2145
2084 2324
2109 2339
1914 2364
2218 2604
1916 2128
2278 2586
2592 2235
2604 2229
2117 2292
2516 2072
2221 2328
2279 2347
2516 2458
2020 1929
2504 1929
1972 2159
2384 2438
2533 2138
2064 2121
2264 2592
2134 2398
2009 2011
2060 2520
2039 2081
2054 2250
1932 2081
1995 1951
2329 2188
2189 2347
2255 2207
2331 2109
2593 2381
2060 1985
1935 1927
1963 2253
2370 2112
2573 2549
2377 1970
2381 2370
2045 2240
2482 2326
2376 2326
2200 2370
2551 2554
1955 2468
2241 2599
2135 1932
2455 2424
2499 2131
2588 2026
2339 2122
2059 1963
1577 2135
2654 2492
2326 2579
2276 2348
1577 2465
2072 2052
2344 2010
2352 2387
2532 2552
2093 2139
2018 1957
1940 1916
2651 1964
2446 2359
2328 2028
2590 2201
1997 2109
2430 1962
1941 2336
2144 2598
2111 2189
2586 2206
2033 2037
2206 2613
1954 2268
2525 2117
2553 2546
2287 2309
2117 2628
2141 2047
2556 1993
2212 1938
2446 2200
2279 2148
2604 1997
2307 2624
2601 2118
2579 2395
1940 2417
1991 136
2340 2460
2171 136
1985 2078
2492 2078
2591 1985
1980 1968
2112 2551
2010 2616
1993 2602
2550 2423
1993 2559
2500 2539
2220 2500
2598 2419
2556 2376
2458 2267
1962 2559
2053 1465
2223 2510
2244 2324
2125 2087
2657 2018
2307 2200
2103 2084
2551 2619
2200 2140
2165 2552
2202 2620
2233 2212
2172 1918
2120 2156
2247 1947
2049 2035
2379 2007
2087 2241
2077 2334
2386 2334
2203 2047
2327 2510
2623 2329
2389 2626
2498 2463
2132 2509
2138 1994
2194 2472
2610 2616
2357 2129
1953 2210
2005 2030
2199 2047
2343 2319
2543 1941
2111 2221
2547 2509
2224 2292
2075 2384
2630 2654
2213 2638
2355 2128
2233 1918
2363 1943
2328 2039
2657 2447
2201 2553
2302 2057
1979 2504
2290 2140
2374 2339
2654 2104
2600 2064
2507 2139
1953 2078
2348 2560
2615 2095
2579 2326
2448 2082
2173 2357
2564 1986
2631 2083
1962 2625
2271 2430
2276 2190
2240 2600
2410 2122
2633 2027
2002 2127
1941 2560
2370 1943
1943 2654
2248 2152
2241 2224
2526 2428
2278 2139
1946 2115
2174 2372
2340 2037
1917 2045
2131 2613
2137 2071
2617 2463
2383 2546
2278 2556
2451 2511
2550 2037
2112 2430
2416 2176
2206 2109
1465 2132
2240 2123
2491 1577
2180 2555
2429 2512
2244 2477
2464 2074
2655 2253
2334 2088
2064 2624
2156 2015
2058 1943
2578 2477
2184 2386
2469 2086
1997 2630
2546 2552
2539 1917
2553 2326
1966 2478
2395 2043
2145 2107
2521 2200
2381 2630
2564 2340
2009 2143
2500 2624
2111 2473
2045 2278
2074 2056
2146 2162
2488 2313
2030 2064
2229 2539
2194 2042
2261 2290
2221 2434
2491 2224
2575 2356
2368 2052
2417 2039
2533 2598
2074 2103
2121 2299
2331 2356
2004 1973
2512 2203
2594 2425
2080 2236
2216 2339
2171 2435
2539 2118
2448 2231
2309 2605
2430 2464
2461 2081
2409 2063
2500 2404
2308 2370
2489 2064
2020 2468
2197 2156
2171 2157
2521 1925
2103 1985
2473 2186
2356 1979
2028 2042
2039 2351
2376 1966
2328 2343
2003 2438
2419 2475
2639 2337
2103 2370
2369 2026
2077 2414
2177 2509
2138 2510
2330 2350
2104 2150
2308 2124
2213 2064
2340 2536
2352 2392
2519 2163
2151 2223
2530 2302
2600 2564
2133 2081
2254 2328
2377 2328
2333 2292
2335 2047
2124 2532
2184 2287
2500 2386
2131 2109
2593 2184
2037 2462
2586 2428
2199 1994
2188 2492
2223 2398
2183 2065
2059 2624
2507 2172
2246 2471
2344 2002
2337 2018
2283 2567
2460 1941
1940 2588
2001 2022
2617 2649
2005 2164
2462 2646
1918 2563
2059 2619
1718 2174
2460 2499
2111 2235
2578 2615
2237 2462
2408 2078
2214 2047
2659 2357
2078 2206
2145 2502
2393 2229
1925 2266
2274 2438
2059 1917
2347 2264
2176 2185
2462 2212
2430 2331
2045 2210
1941 1938
2352 2309
2020 2559
2276 2184
2241 2081
2028 2081
2386 2073
2532 2602
2030 2414
2253 2005
2329 2428
2551 2559
1954 2180
2087 2163
2124 2059
2332 1994
2482 2625
2334 2300
2326 2395
2651 2318
2012 2378
2543 1959
1997 2500
2550 2253
2611 2073
2240 2340
2516 2052
2142 2287
2657 2225
2560 2104
2174 2111
2506 2551
1953 2601
2307 2064
2467 2040
2521 2386
2433 2467
2484 2043
2607 1943
2272 2117
2112 2578
2624 2030
2055 2278
1577 2010
2423 2124
2052 2347
2385 2305
2275 2409
2039 1959
2032 2512
1931 2116
2546 2059
2463 2512
2378 2447
2118 2261
2288 2266
2553 2278
2192 2004
2592 2347
2638 1985
2550 1941
1970 2282
1941 2509
2069 2630
2065 2462
2174 1954
1929 2308
2469 2108
2045 2564
2602 2600
2520 2309
2011 1973
2574 2172
2649 2111
2492 2370
2311 2462
2189 1983
2522 2161
2626 2633
2654 2552
2438 2304
2001 2157
2217 2113
1943 2216
2376 2556
1995 2364
2598 2026
2591 2201
2324 2172
1984 2418
2326 1962
2348 2410
1959 1948
2299 2573
2108 2278
2619 1943
2218 2115
2247 2117
2045 2108
2060 2290
2032 2333
2121 2586
2142 2536
2553 2446
1987 2372
2188 2253
2139 2354
2591 2624
2460 2088
2656 2145
2310 2282
2136 1962
1917 2504
2351 2315
2239 2002
2600 2573
2549 2306
2432 2415
2417 2378
2095 2462
2275 2140
2190 2536
1925 2625
2520 2109
1972 2629
2365 1980
1926 2101
2037 2190
2423 2020
2655 2095
2130 2397
2492 2060
2144 2282
2552 1971
2184 2600
1962 2229
2602 2369
2331 2074
2244 2561
2464 2553
1954 1935
2253 2526
2302 2324
2220 2539
1946 2352
1718 2081
2547 2153
2347 2102
2326 2376
2193 2397
2087 2135
2046 2326
1986 2165
2244 2624
2398 2144
2533 1994
2109 2103
2471 2174
2463 2153
2267 2510
2172 2536
2005 2551
2154 2308
2579 2140
2268 2471
2594 2128
1964 2176
2133 2151
2617 2379
1951 2585
2086 2058
2092 2331
1986 2602
2350 2588
2257 2121
1914 2583
2499 2460
2289 2214
2638 2064
2131 2543
1983 1962
2052 2111
2392 2551
2407 1985
1993 2374
2084 2429
2586 1917
2418 2542
2131 2184
2241 2254
2188 2045
1929 2369
2482 2084
2201 2078
2398 2336
2361 2628
1926 2267
2308 2172
2478 2482
2374 2638
2104 2482
1993 2654
2615 2201
1966 2353
2343 2273
2410 2576
2278 2098
2336 2509
2372 2250
2212 2078
2126 2371
2354 2237
2233 2184
2516 2508
2579 2549
2112 2278
2043 2323
2141 2416
2220 2213
2324 2090
2384 2420
2125 2038
2640 2364
2120 2412
2323 2112
2103 2306
2148 2609
2306 2655
2117 2268
2107 2089
2028 2519
2499 2549
2300 2093
2111 2279
2592 2081
2122 2220
2369 2625
2074 2356
2625 2559
2277 2656
2268 1959
1987 2047
2180 2653
2043 1966
2356 2124
1936 2314
2532 2253
2638 2324
2183 2649
1971 2165
2631 2190
2088 2638
1946 2154
2078 2391
2485 2206
2550 2654
2477 2500
2118 2306
2495 2112
2628 2126
2199 2652
2088 2115
2625 2550
2088 1963
2359 2299
1979 2604
2059 1918
2030 2206
2423 2504
2150 2233
2027 2633
2462 2460
2163 2519
2546 2323
2271 2477
2060 2266
2381 2646
2244 2408
2314 2286
2076 2170
2090 2414
2344 2071
1991 2645
2643 2144
2504 2095
2232 1945
1983 2083
2180 2267
1983 2040
2313 2130
2169 2187
2506 2593
2359 2507
2504 1986
2552 2381
2617 2072
2190 2630
2213 1985
2064 2063
2619 2478
2127 2529
2474 2231
2551 2340
2283 2053
2165 2601
2229 2478
1920 2384
2528 2558
2474 2570
2625 2560
2145 2085
2611 2059
2604 2115
1929 2287
2529 2389
1947 2274
2438 2155
2123 2359
2268 2567
2418 2575
1957 2159
2472 2196
2394 2133
2229 2638
2150 2414
2292 1577
2398 2169
2627 2001
1919 2341
2016 2018
2088 2340
2043 2429
2069 2266
2550 2309
2384 2508
2247 2246
2640 2159
2323 2561
2396 2465
2430 2123
2279 2597
2484 2078
2005 2190
2121 2655
2148 2292
2176 1923
2001 2116
2532 2131
2215 2445
2368 2598
2059 2460
2504 2625
2179 2118
2498 2226
2039 2267
2643 2039
2347 2567
2188 2392
2127 2594
2144 2174
2491 2508
2500 2046
2088 2404
2154 2556
2054 1948
2370 2430
2594 2398
1994 2451
2575 1971
2492 2460
2232 2186
2317 1922
1934 2313
2393 2334
2292 2143
2611 2467
1947 2007
2341 2197
2225 2202
2102 1920
1966 2542
2190 2059
2098 2056
2578 2376
1971 2428
2081 2010
2352 2290
1947 2128
2409 1979
2384 1970
2371 2126
2199 2169
1989 1966
2410 2210
2347 2139
1924 2259
2537 2081
2216 2423
2616 2537
2408 2324
2093 2307
2347 2563
2121 1946
2121 2464
1988 1982
2559 2278
2231 2488
2005 1997
2391 2576
2324 2356
2543 2118
2428 2275
2235 2304
2397 2342
2148 2599
2409 2190
2401 2426
1966 2499
2611 2077
2309 2074
2292 1932
2082 2448
1988 2513
2056 2613
1962 2271
2276 2561
2637 2117
2126 2341
2351 2327
2376 2630
2360 2126
2356 2077
2410 2109
2201 1929
2229 2172
2610 2419
2038 2330
2283 2101
2142 2506
2233 2601
2436 2544
2494 2337
2200 2625
2308 2339
2077 2266
2348 2253
2054 2398
2410 2408
2143 2068
2407 2381
2491 2249
2043 2098
2533 2149
1985 2046
1997 2244
2560 2078
2299 2216
2461 2235
2571 2009
2339 2467
2482 2020
2220 2623
2083 2655
2332 2463
2292 2567
2206 2646
1962 2395
1997 2131
2248 2335
2395 2532
2331 2271
2646 2309
2203 2498
2194 2555
2372 1959
2478 1983
2256 2133
2274 2222
2220 2331
2218 2220
2220 2430
2179 2188
2300 2218
2485 2233
2307 2467
2134 2199
2229 2560
2200 2290
2148 2510
1926 2471
2433 1983
2591 2098
2428 2206
2653 2333
2165 2376
2131 1993
2174 2047
2643 2149
1947 1955
2549 2307
2133 2637
2614 2228
2077 2074
2479 2438
2030 2607
1957 2364
2003 2537
2352 2520
2477 2121
2150 2543
2400 2355
2060 2559
1942 2393
1981 2458
2630 2348
2090 2172
2122 2300
2492 2140
2111 2274
2372 1987
2315 2330
2390 2053
2427 2142
2047 2592
2192 2472
2218 2007
2417 2018
2005 2078
2653 2111
2498 2377
2590 1925
2123 2482
2446 2418
2261 2077
2446 2216
2623 2058
2053 2196
2391 2545
1932 2508
2198 2132
2023 2577
2144 2653
2174 1718
2073 2404
2253 2150
2201 2507
1918 2485
2280 2294
2250 2355
2591 2331
2260 2228
2384 2589
2323 2625
1932 1916
2147 2387
2040 2606
2449 1942
2089 2440
2467 2131
2264 2102
2117 2294
2625 2532
2469 2553
2334 2363
2526 2430
2021 2276
2336 2372
2247 2292
2148 2327
2364 2459
2579 2299
2377 2652
2266 2123
2526 2206
2334 2139
2338 2282
2135 2338
2063 1938
2582 1920
2273 2203
1941 2338
2302 2148
2022 2660
2154 2586
2543 1985
2213 2030
2426 1992
2477 2339
2273 2117
2058 2104
1963 2307
2033 2123
2522 2608
2123 2485
2533 2038
2257 2172
1954 2199
2266 2504
2414 2069
2608 2367
2604 2381
2123 2574
2597 2187
2451 2603
2325 2174
2109 2326
2340 2237
2368 2133
2484 2549
2590 2539
2257 2309
2115 2552
2579 2520
2289 2398
2059 2485
2212 2615
2348 2271
1943 2098
2438 2075
2591 2124
2550 2306
2030 2164
2074 2090
2347 2430
2419 2498
2083 2539
2292 2332
2607 2348
2273 2419
2491 1923
2104 2309
2408 2410
2553 2093
2077 2560
2611 2055
2516 1577
2047 2010
2077 2103
2123 2229
2150 2005
2509 2180
2090 2324
2625 2290
2445 2111
2086 2331
2024 2658
2121 2077
2387 2334
2577 2440
2247 1923
2124 2492
2574 2347
2017 2565
2037 2611
2498 2242
2002 2475
2038 2087
2345 2232
2290 2550
2039 2232
2247 2597
2095 1986
2542 2507
2538 2009
2028 2138
2096 2243
2271 2492
2343 2328
2164 2563
2340 2506
2588 2510
2507 2423
2140 1966
2131 2576
2619 2233
2614 2113
2037 2139
2164 2464
2564 1985
2615 2574
2392 2073
2574 2464
2418 2446
2497 2049
2412 2405
2525 2133
2347 2275
2419 2603
2131 2638
2103 2083
2075 2396
2413 2355
2408 2551
1931 2627
2511 2246
2540 2029
2323 2624
2225 2620
2369 2140
2283 2347
2554 1917
2315 2472
1943 2484
1929 2139
1985 2279
2203 2151
2462 1985
2038 2180
2348 2430
1941 2555
1951 2364
2409 1984
1998 2364
2081 2215
2332 2054
2550 1943
2333 2057
2378 2024
2206 2131
2351 2592
2509 2396
2563 1966
2327 2282
2338 2149
2103 1929
2369 2299
2377 2087
1986 2140
1959 2537
2600 2043
2376 2200
2616 1945
2347 2510
2371 2440
2492 2275
1964 1923
2258 2112
2275 2121
2056 2020
2502 2163
2088 2121
2451 2319
1932 2135
2153 2588
2533 2194
2336 2053
2300 2446
1917 2033
1941 2127
1993 2237
2353 2561
2229 2073
2054 2075
2243 2062
2611 2590
2009 2337
2447 2538
2176 2525
2467 2348
2471 2598
1938 2266
2200 2122
2062 1994
2603 2081
1941 2264
2154 2030
2275 2623
1968 2659
2354 1966
2063 2131
2502 2543
2559 2553
2468 1993
2374 2354
1966 2309
2009 1972
2244 2591
2002 2137
2352 2542
1994 2028
1992 2401
2328 2302
2406 2219
2259 2420
2306 2237
2491 2047
2543 2472
2244 2218
2210 2348
2136 2045
2253 2348
2232 2125
2084 2638
2636 2639
1920 2215
2142 2464
1953 2607
2543 2253
2461 2293
2324 2543
2235 2265
2430 2139
2005 2090
2261 2150
2033 2352
2111 2502
2154 2323
2539 2212
2073 2484
2434 2249
2394 2062
2271 2526
2471 2567
2356 2590
2063 2142
2289 2649
2294 2471
2118 1993
2128 2294
2464 2430
2073 2485
1918 1946
2285 2267
2646 2543
2260 1930
2451 2053
2072 2247
2554 2078
2278 2331
1925 2098
2600 2418
2180 2087
2414 2489
2284 2365
2410 2407
2292 2268
2077 2410
2575 1985
2530 2529
2637 2029
2467 2308
2073 2347
2172 2350
2257 2115
2142 2590
2495 2404
2369 2206
2602 2140
2625 2154
2630 2124
2543 2134
2367 2296
2282 2598
2172 2546
2495 2104
2124 2069
2396 2072
1959 2319
2037 2257
2594 2032
2285 2187
2507 2549
2088 2460
2600 1983
2109 2409
2095 2334
2201 2216
2370 2150
2276 2625
2290 2123
2543 2306
2649 2149
2593 2043
2030 2625
2600 2122
1929 2233
2502 2302
2200 2559
2224 2071
2067 2084
1966 2253
1980 2012
2073 2244
2073 2482
2334 2482
2356 2055
2134 2642
2164 2607
2069 2500
2550 2131
1919 2538
2122 1989
2590 2074
2009 2013
2233 2376
2024 2022
2369 2543
2592 2338
2509 2463
2516 2279
2211 2186
2516 2028
2582 2419
2392 2324
2122 2299
2553 2593
2090 2216
2498 2268
2258 2393
2194 2330
2142 2189
2243 2384
2339 2275
2550 2386
2491 2081
1718 1577
2420 2597
1995 1991
1941 2593
2074 2418
2598 1926
2215 2267
2593 2485
2571 2531
2428 2311
2225 2001
2190 2556
1948 2042
2549 2370
2604 2418
2642 2510
1946 2201
2407 1979
2311 2220
2537 2434
2575 2484
1985 2623
2266 2326
2234 2391
2598 2351
2363 1983
1929 2142
1919 2648
2038 1577
2611 2078
2054 2153
2077 2551
2062 1959
2121 2278
1973 1935
2430 2433
2169 2273
2038 2133
1987 2385
2356 2078
2225 2171
2064 2464
2299 2352
2313 2227
2642 2629
2611 2300
2047 2209
1994 2117
2370 1917
2267 2458
2215 2149
2206 2601
2347 2451
2492 2586
2494 1914
2578 2559
2324 2299
2179 2086
2412 2023
2032 2417
2142 2392
2655 2553
1979 2323
2040 2147
2564 2306
2258 2369
2645 2268
2499 2553
2161 2264
2003 2479
2464 2564
2187 2417
2509 2471
2237 2334
2396 2282
2556 2381
2446 2063
2468 2348
2326 2030
2414 2550
1989 2300
1940 2151
2551 2257
1941 2556
2108 2030
2047 2247
2304 2509
2654 2374
2428 2554
2428 2520
2561 2446
1943 2237
2482 2347
2046 2460
2507 2188
2352 2549
2299 2467
2407 2033
2108 1929
2433 2630
2108 2063
2218 2340
2510 2199
2071 2463
2579 2561
2240 2407
2504 2074
2333 2071
1953 2136
2063 1946
2650 2490
1982 2594
2313 2558
2103 2210
2184 2046
2271 2088
2532 2331
2104 1971
2645 1914
1975 2361
2623 2104
2022 2157
2294 2649
2002 2582
2590 2520
2553 2030
2289 2145
2479 2603
2469 2409
2043 2278
2276 1962
2124 2043
2410 2253
2542 2623
2122 2216
1959 1577
1983 2550
2551 2060
2418 2216
2194 2461
2340 2123
1917 2495
2485 2542
2557 2310
2590 2551
2044 1966
2348 2109
2064 2218
2266 2276
2472 2555
2643 2246
2042 2138
2261 1993
2139 1962
2633 1968
2342 2628
2117 2641
2280 2384
2364 2337
2073 2391
2088 2468
2475 1718
2311 2123
2392 2446
2638 1925
2064 2086
2586 2369
2619 2387
2338 2293
2030 2237
2408 2552
2615 2551
2318 2155
2477 2575
2140 2165
2509 2592
2184 2549
2056 2323
2199 2243
2418 2615
2134 2285
2508 2473
2153 2592
2148 2336
2173 2286
2261 2553
2394 2268
2241 2198
2340 2064
2241 1932
2226 2461
2371 2227
2390 2111
2627 2011
2257 1986
2410 2069
2112 2139
2149 2347
1970 2072
2395 2040
2184 2469
2233 2521
2630 1985
2629 2151
2040 2218
2581 2296
2042 2283
2199 2313
2040 2064
2336 2153
2323 2630
2200 2619
2646 2407
2556 2300
2326 2414
2363 2624
2354 1993
2506 1918
1718 2254
2188 2212
2233 2554
2201 2564
2508 136
2108 2561
2283 2603
1925 2112
2352 2131
2560 2046
2564 2410
2601 2586
2574 2212
2381 2030
1963 1943
2336 2267
2150 2122
2063 1997
2302 2250
1985 1929
2633 2626
2008 2232
2590 2407
2352 2229
2323 2290
2340 2489
1577 2509
2526 2103
2611 2172
2600 2165
2278 2526
1919 1999
2133 2511
2391 2266
2307 2216
2300 2090
2033 2331
2547 2327
2601 2033
2030 1979
2533 2582
2623 2586
2590 2363
2323 2206
2058 2654
1927 2011
1971 2573
2550 2526
2190 2542
2300 2376
2063 2590
2246 2355
2559 2564
2601 2240
1979 2271
2115 2276
2563 2611
1947 2498
2625 2103
2611 2484
1990 2397
2586 2108
2187 2343
2184 2590
1962 2083
2417 2161
2519 2518
1940 2343
2467 2602
2104 2131
2253 2593
2544 2502
2387 2147
2081 2042
2581 2048
2103 2604
2143 2010
2340 2164
2369 2590
2216 2115
2646 2429
2103 2258
2140 2311
1942 2443
1938 2354
2551 2188
2161 2026
2652 2451
2039 2498
2209 2211
2233 2179
1926 2368
2127 2367
2487 2167
2583 1980
2504 2121
2206 2556
2531 2328
2427 2347
2333 2344
2546 2615
2068 2592
2369 2043
1926 1970
2464 2492
2611 2090
2553 2060
2123 2578
2244 2376
2271 2485
2445 2149
2292 2047
2471 2032
2191 2436
1914 1980
2187 2445
1918 1979
2604 2359
2556 2179
2104 2347
2229 2112
2549 2520
2649 2436
2351 1941
2103 2154
2542 2043
1944 2133
2592 2072
2031 2047
2276 2323
2102 2302
2414 2299
2233 2531
2309 2369
2090 2299
2500 2428
2591 2140
2433 2206
2098 2308
2027 1914
2579 2578
2233 2556
2336 2239
1953 2033
2395 2123
2654 2418
2492 2489
2165 2604
2073 2499
2199 2057
2397 2562
2033 1963
2590 2147
2409 2607
2347 2601
2459 2027
2353 2356
2189 2398
1949 2152
2619 2074
2081 2617
2354 2140
2214 2288
1932 2007
1943 2131
2244 2307
1948 2071
2338 2199
2623 2521
2368 2174
2069 2005
1938 2278
2033 2546
2325 2199
2189 2582
2359 2086
2340 2482
1985 2142
2575 2040
2054 2267
2642 1947
1939 2415
1960 2236
2035 2129
2108 1986
1995 2633
2536 2165
2020 2381
1927 1958
2128 2302
2151 2512
2356 2374
2131 2395
2089 2397
2030 2619
2604 2124
2159 2009
2212 2464
1955 1959
2107 2145
2652 2282
2264 1940
2266 2244
2338 2468
1957 2620
2611 2258
2542 2602
2586 2164
2006 2027
2552 2331
2632 2313
2059 2237
2464 2077
2419 2641
2484 2381
2083 2348
2593 2560
1917 2140
2268 2436
2121 2561
2111 2247
2615 1946
2511 2279
2302 2215
2200 2056
2051 2342
2284 2627
2333 2642
2326 2348
2468 1929
2233 2600
2479 2384
2224 2343
1926 2174
1918 2278
2367 2406
2436 2475
2397 2260
2354 2340
2626 2538
2438 2221
2369 1989
2151 2384
1993 2229
2062 1981
2098 2150
2564 1942
2426 2622
2539 2112
1971 2078
2111 2598
2630 1941
2638 2086
2553 1989
2386 1971
2278 2218
1941 2451
2151 2463
2438 2199
2640 1958
2233 2430
1933 2360
1985 2077
1948 2327
2191 2250
2242 2062
2206 2586
2313 2450
2279 2479
2266 2485
1952 2111
2547 2161
2625 2164
2135 2336
2338 2475
136 2279
2463 2642
2347 2053
2055 2266
2339 2468
2630 2030
1971 2040
2630 2306
2354 2150
2172 2506
2385 2215
2455 2146
1935 2658
1948 2351
2049 2317
2423 2347
2304 2328
2356 1938
2469 2115
2369 2329
2060 2059
2247 2132
2112 2131
2287 2063
2005 2253
2232 2068
2642 1964
2147 2404
2589 2616
2024 2268
2591 2638
2660 2627
2179 2311
2429 2543
2410 2213
2077 2253
2551 2233
2250 2502
1983 2602
2147 2300
2464 2410
2115 2122
2578 2485
2607 2506
2501 1970
2098 2573
1983 2478
2516 2351
2559 2040
2287 2386
2304 2003
1982 2222
2347 2522
2063 2492
2115 2074
2185 2425
2064 2550
2409 2020
2643 2567
2026 2381
2040 2370
1919 2620
2308 2309
2611 2329
2539 2369
2472 2543
2139 1943
2460 2369
2611 2554
2334 2030
2072 2174
2601 1983
2521 1953
1925 2423
2461 2649
2045 2063
2586 2261
2088 2554
1994 2194
2334 2123
2057 2592
2254 2649
2194 2471
2266 2564
2132 2434
1985 2410
2526 2326
2095 2554
2512 1985
2128 2475
2582 2081
2271 2586
2061 1935
2491 2054
2054 2519
2362 2176
2035 2091
2184 2482
2578 2601
2463 2543
2278 2495
2574 2414
2555 2347
1959 2068
2142 2044
2601 2446
2246 2347
2537 2264
2629 1465
2654 2630
2071 2429
2404 2500
2087 2289
2628 2089
2587 2357
2169 2032
2118 2410
2009 2027
2563 2586
2188 2240
2440 2335
2660 2006
2472 2629
2559 1941
2609 2384
2613 2340
2109 2340
2084 1983
1962 2520
2073 2064
2660 2658
2197 2091
2322 2107
1938 2210
2172 1971
2103 2088
2187 2292
2198 2087
2405 2129
2243 2111
2374 2654
1989 2271
2189 1945
1918 2430
2007 2463
2463 2151
1997 2093
2280 1941
2594 2282
2001 2435
2206 2467
2657 1914
2366 2038
2412 2082
2458 2518
2112 2410
2260 2659
1959 2132
2298 2516
2074 2276
2616 2588
2408 2233
2308 2179
2088 2418
2543 2190
2275 1938
2235 2511
2384 2117
2551 2086
2179 2229
2030 2559
2609 2196
2324 1983
2121 2549
2047 2175
2253 1997
2592 1945
2022 2097
2091 2371
2602 2216
2109 2499
2007 2249
2464 1985
2194 2399
2026 1925
2412 2160
2299 2190
2359 2103
2553 2536
1980 2645
1938 2433
2376 2601
2189 2032
2366 2023
2623 2615
2325 2102
2352 2206
2630 2495
2489 2408
2576 2262
2309 2044
2649 2463
2482 2131
2030 1918
2592 2052
2001 2011
2504 2240
2200 2469
2311 2326
2659 2061
2125 2336
2579 2229
2522 2042
2257 1962
2276 2240
2594 2211
2253 2266
2071 1941
2218 2542
2356 2323
2416 2637
2247 2419
2327 2180
2309 2069
2261 2468
1924 2401
2151 2588
2436 2649
2602 2090
2018 2050
2111 2249
2512 2588
2602 2408
2271 2323
2467 2423
2512 2199
2233 2477
2292 2328
2328 2432
2336 2343
2500 2311
2577 2570
2172 2559
2081 2436
2259 2102
2061 2001
2182 2452
2645 2627
2133 2087
2150 2043
2035 2488
2363 1986
2593 2551
2610 2038
2646 2007
2052 2148
2294 2247
2617 1926
2467 2574
2543 2629
2043 2299
2575 1941
2150 2237
2573 2020
2176 2475
2030 2578
2361 2644
2604 2549
2629 2278
2359 2218
2506 2056
2121 2590
1918 2233
2122 1929
2398 2419
2151 2247
2504 2370
2447 2417
2055 2218
2464 2381
2115 2395
2285 2241
1971 2546
2139 1986
2395 2521
2608 2208
2590 2423
2038 2445
2115 2237
2347 1925
2220 2553
1984 2347
2244 2646
2310 2419
2049 2503
2121 2108
2630 1962
2429 2216
2317 2587
1985 2560
2395 1943
2464 2504
2624 2233
2026 2328
2213 2521
1973 2657
2328 2542
2492 2131
2280 2199
2261 2619
2543 2259
2010 2155
2421 2204
2022 2018
2073 2619
2148 2643
2419 1577
2172 2521
2502 1913
1938 2348
2434 2243
1918 2300
2508 1959
2211 2048
2592 2398
2394 2138
2583 2337
2464 2631
2364 2001
1577 2385
2149 2617
2550 2630
1918 2579
2546 2446
2335 2173
2423 2543
2290 2165
2043 2606
2043 2433
2512 2429
2578 2348
2619 2200
2275 2392
2551 2376
2073 2478
2428 2395
2625 2069
1975 2335
2289 2419
2429 2123
2146 2659
2082 1926
2590 2172
1932 2465
1984 2131
2404 2154
2396 2127
2331 2418
2108 2551
2047 2333
2046 1917
2122 2244
2425 2242
2323 2573
2499 1942
2344 2347
2257 2370
2526 2190
2116 2312
1972 2585
1959 1955
2184 1943
2081 2127
2482 2150
2604 2482
2384 2544
2477 1985
2370 2287
2150 2077
2615 2172
2059 2329
1465 2398
2154 2359
2271 2309
2436 2319
2300 2067
2297 2009
1979 2433
2058 2088
2063 2607
2336 2330
2553 2244
2080 2277
2187 2038
2046 2005
2589 1718
2385 2138
2268 2042
2343 1577
2512 2007
2111 2134
2442 2499
2417 2189
2293 2533
2385 2239
2504 2045
2054 2475
1943 2063
2598 2338
2223 1955
2333 2529
2309 2363
2266 2229
2030 2043
2606 2625
1993 2433
2637 2362
2308 2326
2451 2436
2559 2266
2074 2433
2310 2272
2244 1946
2299 1925
2323 2020
2339 2188
2153 2176
2090 2591
2499 2095
2629 2598
2563 2374
2630 1925
2546 2369
2250 2294
2052 2510
2480 2540
2212 2299
2363 2542
2642 2475
2655 2154
2583 1972
2059 2542
2279 2268
2201 2104
2248 1978
2063 2625
2192 2018
2327 2379
2648 2001
1959 2003
2367 2598
2516 2087
2370 2578
2572 2075
2241 2138
1989 2142
2624 2408
2180 2026
2246 1932
2052 2543
2482 2578
2124 2184
2446 2131
2526 1984
2539 2206
2433 2278
2084 2546
2013 1928
2363 2154
2040 2556
2090 2560
2118 2526
2407 1917
2363 2334
2323 2190
2250 2332
2064 2190
2300 2131
1983 2549
2196 1932
2149 2368
2306 2334
2631 2543
2056 2520
2128 2544
2354 2122
2294 2252
2315 2333
2309 2428
2463 2451
1932 2333
2526 2507
2495 2218
2286 2173
1941 2137
2220 1938
2430 2578
2623 2625
2387 2404
2376 2600
2290 2407
2489 2104
2007 2436
2284 1972
2287 2220
2329 2229
2138 1920
2611 2104
2161 2417
2410 2059
2276 2624
2434 1947
2271 2090
1985 2216
2554 1925
2582 2298
2030 2624
2345 2555
2242 2605
2495 2323
2550 2469
2033 2460
2368 2125
2471 2465
2543 2271
1979 2521
2283 2588
2342 2562
2482 1962
1985 2391
2563 2410
2381 2543
2386 2414
2213 2602
2602 2060
2419 2133
1971 2118
2223 2605
2426 2486
2128 2332
2039 2153
2268 136
2233 2560
2039 2010
2472 2189
2199 2603
2287 2446
2512 2576
2073 2462
2229 2590
2550 2573
2108 2103
2081 2075
2392 2575
2127 2002
2553 2579
2638 2654
1973 2004
2224 2087
1939 2032
1978 1936
2331 2276
1940 2463
2392 2430
2385 2153
2631 2118
2463 2135
2278 2131
2638 2063
2218 2140
2410 2499
1962 2601
2338 2592
2123 2108
2139 2086
2206 2625
2279 2396
2003 2282
2283 2138
2398 1964
2121 1985
1943 2058
1919 1972
2381 2356
2283 2149
2043 2059
2102 2610
2482 2655
2391 2090
2624 1938
2369 2574
2571 2143
2550 2233
1930 2411
1997 1985
2499 2395
2468 2344
2564 2383
2433 2142
2151 2522
2241 2384
2326 2093
2241 2294
2184 2271
2272 2176
2372 2138
1918 2184
1946 2307
2224 2180
2590 2184
2283 136
2594 2199
2603 2243
2576 2573
2417 2199
1943 2121
2127 2292
2511 2052
2186 2211
2326 2359
2533 2328
2042 2598
2500 2578
1971 2410
1918 2108
2189 2133
2543 2220
2617 2438
2047 2474
1987 2581
1985 2590
2112 2123
2659 2156
2597 2068
1954 1948
2352 2433
1577 2315
2153 2068
2598 2509
2183 2169
1931 1927
2083 2078
2202 2159
2361 2322
2597 2547
2240 2326
2376 2095
2144 2616
2586 2074
2199 1987
2127 136
2600 2554
2064 2124
2615 2507
2169 2111
1925 2278
2028 2183
2104 2139
1947 2390
2290 2561
2368 2461
2275 2324
2145 2544
2073 2489
2332 2292
2509 2241
2385 2629
2225 2192
2334 2043
2126 2488
2624 1925
2511 2319
2324 2287
2180 2543
2032 2472
2131 2409
2550 2201
1986 2363
2140 2630
2033 2370
2560 1963
2218 2244
2332 2511
1986 2233
2622 2513
2250 2117
2063 2500
2444 2515
2347 2233
2190 2278
2395 2299
2499 2393
2477 2240
2499 2266
2334 2559
2199 2557
2126 2008
2037 2354
2418 2115
2560 2392
2598 2134
2485 2020
2334 2492
2073 2179
2622 1924
2063 1966
2138 2293
2280 2282
2090 2521
2228 2316
2532 2184
2074 2190
2308 2464
2056 2147
2154 1918
2592 2385
2289 2461
2326 2124
2046 2446
2428 2433
2590 2103
2339 1917
2047 2302
2414 2507
2611 2478
2395 1917
2111 2007
2408 2560
1985 2549
1954 2032
2543 2329
2359 2184
2376 2136
2655 1918
2078 1979
2425 2637
2200 2074
1989 2266
2340 2423
1997 2410
2115 2549
2109 2462
2240 2553
2508 2436
2319 2068
2128 2268
2196 2653
2602 2591
2162 2146
1993 2353
2212 2561
2237 2423
2649 2081
2135 2598
2187 2174
2086 2356
2093 2561
1943 2123
2369 2030
2133 2608
2619 2354
1943 2495
2543 2215
2539 2090
2582 2176
2445 2597
2399 2304
2040 2593
2424 2587
2026 2299
2482 2033
2477 2553
2482 2654
2179 2504
2625 2352
2566 2367
2284 2171
2126 2231
2233 2020
1963 2142
2359 1985
1989 2575
2407 2539
1929 2604
2150 2354
2045 1943
2273 2498
2220 2109
2418 2539
2282 2081
2261 2043
2073 2554
2069 1963
2474 2523
2419 2010
2482 2638
2586 2478
2156 1922
2039 2465
2458 136
1985 2546
2062 2438
2266 2098
2508 2259
2552 2078
1969 2087
2550 2063
2191 2194
2436 2143
2559 2233
2040 2468
2184 2602
2035 2628
2521 2030
2081 2461
2218 2339
2090 2404
1984 2139
2546 2073
2047 2196
1981 2328
2139 2408
2419 2132
2154 2600
2208 2040
2077 2329
2326 2271
1958 2585
2504 2172
2243 2537
2333 2475
1954 2620
2376 2560
2249 2372
1958 2024
2007 2259
2142 2386
2124 2369
2248 2644
2164 2206
2244 2469
2176 2153
2277 2488
2005 2363
2315 2609
2199 2384
2640 2658
2232 2223
2560 2543
2322 2145
2611 2504
2192 2001
2304 2283
2348 2334
2364 2620
2348 2604
2333 2072
2250 2081
2601 2386
2324 2553
2630 2469
2542 1929
1997 2271
2598 2133
1946 2084
2229 2290
2590 2574
2331 2625
2201 2300
2095 2253
2445 1932
1718 2111
2329 2253
2282 2068
1993 2154
2179 2485
2449 2655
2121 1993
2266 2350
2033 2464
2369 2619
2216 2590
2592 2555
1941 2333
2102 2176
1953 1993
2376 2575
2069 2118
2484 2131
2539 2593
1955 2338
1979 1983
2308 2423
2084 2201
2202 2000
2309 2150
2434 2003
2164 2536
1914 2648
1925 2619
2078 2257
1916 1970
2266 2464
2060 2340
2550 2492
2467 2460
2611 2043
2399 2377
2654 2482
2074 2348
2616 2294
2469 2560
2322 2577
2338 2643
2206 2324
1950 2648
2149 2155
2501 2235
2546 2352
2005 2386
2608 2026
2313 2232
2189 1955
2139 2468
2467 2607
2037 2478
2404 2433
2139 2090
2007 2491
2655 1962
2191 2332
2101 1981
2103 2606
2574 2201
2194 2592
2597 1948
1577 2026
1966 1925
2236 2070
1993 2352
2043 2154
2573 2307
2626 1980
2473 2031
2559 2500
2484 2347
2340 2549
2536 2376
2378 2018
2037 1979
2557 2531
2284 2636
2410 2553
1966 2575
1971 2074
1979 2549
2356 2469
2489 2244
2220 2429
2199 2289
2089 2023
2093 2464
2123 2611
2047 2509
2033 2495
2347 2619
2348 2077
2526 1997
2118 2347
1935 1991
2134 2417
2628 2371
2109 1929
2275 2188
2537 2294
2508 1955
2026 2468
2601 2334
2500 1984
2071 1940
2323 2056
2082 2049
2642 2598
1984 1917
1953 2655
2650 2401
2629 2649
2598 2473
2123 2139
2370 2467
2311 2460
2498 2649
2237 2414
2567 2472
2266 2150
2244 2611
2428 2638
2083 2165
2625 1997
2068 2143
2418 2307
2071 2461
2481 1956
2123 2607
1925 2414
2275 1979
2258 2559
2347 2653
2542 2409
2338 2053
2153 2328
2271 2275
2328 2072
2619 2093
2428 1963
2423 2381
2198 2282
2559 2359
2419 1955
1919 2633
2053 2273
1948 2026
2392 2619
2407 2213
2308 2090
2333 2194
2135 1940
2187 2285
2299 2506
2532 2172
2233 2482
2525 2176
2500 2131
2279 2283
2287 2370
2472 2180
2338 2533
1931 1919
2472 2315
2464 2482
2344 2125
2586 2088
2602 2520
2243 2267
2451 2398
2500 2244
2406 2133
1946 2655
2140 2045
2430 1985
2223 1959
2492 2088
2088 2150
2282 2102
2176 2174
2549 2331
2451 2508
2363 2339
2088 2140
2340 2233
2289 2318
2131 2287
2090 2492
2575 2602
2027 2459
1914 1991
2550 2354
2246 2419
2559 2630
2601 2428
2140 2601
2054 2293
2165 1917
2053 2247
2133 2367
2547 2243
2459 2531
2404 2573
2083 1938
2409 2542
2276 2492
2370 2339
2620 1991
2549 2064
2299 2142
2580 2411
1984 2363
2232 2072
2577 1960
2250 2512
2479 2081
2199 2597
2122 2165
1983 2521
2309 2579
136 2143
2501 2344
2129 2371
2308 2409
2090 2484
2268 2544
2122 2638
1914 2171
2244 2121
2124 1963
1920 2111
2374 2140
2184 2073
2602 2428
2184 2356
1970 2328
2035 2023
2362 2610
2152 2107
2259 2345
2352 2404
2232 2571
2027 1995
2115 1918
2407 2410
2630 2324
2078 2213
2464 2164
2598 1955
2223 2327
2289 2127
2233 2090
2556 2611
1962 2561
1993 2060
2279 2250
2339 2201
2348 2586
1954 1927
2226 2053
2655 2520
2326 2253
2419 2294
2004 1976
2005 1929
2220 1918
2063 2271
2563 2495
2271 1929
2200 2549
2567 2589
2539 2150
2532 2046
2460 2526
2310 2176
2418 2290
2176 2133
1943 2324
2150 2615
2131 2376
2417 2187
2607 2190
1985 2212
2462 2109
2161 2336
2200 2526
2198 2598
2629 2143
2613 2220
2659 2660
2290 2395
2611 2518
2482 2045
2275 2266
2004 136
1963 2507
2437 2106
2142 2476
2221 2415
2600 2543
2033 2418
2036 2289
2411 2107
2387 2449
1916 2434
2374 2563
1941 2283
2500 2586
2191 1959
2559 2602
2374 2334
2365 2284
2257 2307
2308 2140
2246 2510
2654 2521
2233 1938
2237 2590
2504 2206
2333 2128
2018 2012
2074 2206
2588 1947
2292 2302
2415 2479
2644 2251
2154 1966
2359 1966
2052 1954
2344 2235
1941 2539
2347 2463
2058 2454
2235 2390
2354 2464
2282 2327
2369 2460
2460 2165
2275 2150
2542 2369
2103 2073
2567 2250
2640 2583
1968 2459
2339 2046
2335 2248
2064 2131
2512 2294
2139 2233
2039 1987
2604 2147
2095 2586
2218 1979
2337 1973
2172 2212
2590 2352
2573 2043
2399 2398
2084 2506
2575 1938
2220 2604
2164 2433
1916 2221
2098 2369
2049 1965
2051 2558
2224 2605
2188 2590
1986 2088
2590 2179
2325 2162
2218 2369
2095 2033
2446 2118
2154 2369
2038 2169
2573 2404
2610 2242
2045 2098
2611 2410
2004 2378
2583 2648
1938 2220
2639 2647
2429 2189
2218 2495
2520 2506
1945 1920
2404 2352
1979 2573
2280 2054
2326 2308
2111 2196
2436 2445
2198 2224
2543 2417
2245 2281
1998 1928
2273 2267
2122 2381
2303 2393
2184 2109
2076 2320
2428 2604
2125 1718
1994 2191
2504 2184
2083 2122
2631 2201
2039 2194
2319 2471
2327 2187
2295 2223
2072 1932
2443 2142
2306 2090
2510 1945
1985 2053
2474 1975
2203 2399
2593 2218
2619 2299
2149 2289
2361 2236
2464 2467
1939 2003
2630 2550
2558 2313
2575 2507
2149 2032
2339 2063
2007 1932
2654 1929
2555 2111
2138 2589
2220 2334
1989 2123
2463 2199
2149 2292
2520 2278
2410 2467
2500 2095
2131 2266
2261 1985
2299 2123
2108 2546
2286 2248
2264 1718
1946 1917
2266 2261
2068 2345
2363 2233
2324 2506
2411 2474
2631 2619
2022 2658
2127 2338
2287 2428
2551 2184
2463 2372
2241 2616
2049 1978
2552 2340
2218 2532
2500 2339
2237 2521
2354 1971
2309 2638
2471 2511
1966 2363
2078 2212
2484 2276
2652 2458
2179 2200
2234 2476
2073 2058
1718 2598
1966 2307
2218 2625
2638 2573
2378 2364
2194 2473
2038 2582
2642 2292
2619 2045
2260 2107
2007 2137
2638 2218
2573 2600
2332 2068
2356 2339
2135 2039
1918 2521
1993 2030
2124 2064
2187 1994
2617 2510
2302 2264
2244 1962
2220 2216
2347 2246
2387 2602
2289 1964
1939 2509
2306 2210
2123 2376
2368 1974
2471 2132
1993 2507
2423 2118
2549 2556
2396 2026
2060 2404
2074 2376
2190 1929
2546 1985
2292 2560
2575 2324
2333 2187
2589 2436
2087 2187
2331 2376
2037 2140
2492 1971
2109 2088
2520 2359
2131 1971
1955 1941
2552 2410
2138 2445
2482 2363
2110 2396
2646 2340
2649 2176
2201 2356
2464 2485
2386 2233
2404 2446
2460 2404
1938 2059
2564 2430
2346 2626
2237 2356
2384 2472
2354 2311
2348 2020
2377 2415
2211 2594
1940 2068
2127 1940
2362 2242
2365 2024
2003 2222
1921 2447
2299 2206
1978 2474
2374 2624
2045 2549
2213 2271
2446 2553
2033 2395
2573 2395
2608 2368
2600 1986
2279 2081
2176 2254
2279 2468
2549 2611
2062 2328
2331 2579
2084 2090
1940 2516
2394 2232
2506 1971
2005 2590
1943 2069
2049 2523
2423 2410
2660 1972
2387 2584
2359 1943
2366 2289
2131 2030
1958 2297
2266 2395
2126 2587
2086 1953
2594 2451
2476 2069
2112 2484
2495 2428
2638 2348
2311 2539
2002 2142
2153 2385
2446 2638
2275 2077
2199 2228
2381 2220
2226 2038
2026 2224
2649 2163
2418 2154
2290 2121
2240 2460
1997 2331
2430 2045
2137 2072
2334 2586
2376 2084
2309 2392
2328 1941
2440 2197
2117 2247
1962 2220
2554 2339
2607 2112
2567 1994
2237 1946
1932 1941
1945 1955
2374 2553
1946 2112
2418 1938
2614 2632
2076 2650
2070 2488
2059 1971
2126 2301
1932 2582
2053 1926
2648 2157
2142 2131
2054 2187
2508 1465
2124 2601
2387 2391
2504 2033
2537 2567
2047 2384
2454 2611
2543 2131
1943 2561
2088 2329
1718 1947
2328 2336
2451 2132
2602 2606
2271 2093
2631 2257
2294 2603
2624 2560
2478 2288
2103 2552
2509 2133
2137 2597
2506 2030
2555 2149
2118 2484
2624 2078
2117 2211
2308 2392
2497 1978
2631 2423
1971 2140
1972 1973
2376 2576
2543 2601
2621 2263
2348 2549
2279 2169
2582 2032
2059 2140
2460 2521
2309 1953
2283 2191
2067 2303
2297 1919
2279 2451
2347 1983
2140 2164
2573 2619
2348 2611
2093 2064
2553 2549
2040 2482
2203 1913
2142 2619
2306 2078
2492 1929
1993 2124
2561 2376
2472 1976
2086 2551
2525 2272
2153 2143
2027 2009
2090 2655
2500 2630
2007 2153
2109 2495
2057 2575
2363 2460
2047 2508
2554 2213
2553 2392
2655 2607
2516 2273
2053 2327
1945 2149
2590 2586
2391 2288
2184 2449
2240 2468
2180 2294
2078 2190
2607 2212
2169 2463
2330 1940
2559 1946
2553 2484
2491 2246
2606 2500
2332 2125
2468 2165
1917 2631
2028 2598
2318 1970
2435 2001
2558 2100
2492 2469
1985 1953
2573 2428
2561 2278
2410 2074
2029 1923
2300 2604
2131 1962
2625 2271
2030 2554
1966 2063
2078 2216
2128 1948
1945 2304
2578 2409
2458 2161
2410 1997
2072 2617
2438 2501
2091 2197
2290 1962
2040 2485
2184 1983
2495 2060
2464 2324
2297 2647
1964 2186
2187 2498
2598 2169
2500 2064
2447 2018
2229 2108
2206 2093
2472 2022
2124 2550
2247 2239
2012 1980
2271 2307
1954 2598
2436 2351
2138 2347
2381 2407
2616 2531
2510 2463
2039 2241
2128 2368
2290 2064
2392 2395
2333 1947
2196 2510
2526 2393
2268 2336
2397 2089
2329 2410
1914 2626
2362 2318
2516 2502
2638 2546
2534 2049
2120 2405
2073 2184
2510 2279
2154 2630
2506 2414
1979 2188
2257 1979
2115 2216
2625 2430
2220 2556
2302 2138
2354 2489
2064 2601
2201 2521
2266 2093
2561 2414
2433 1984
2398 2471
2415 2384
2078 2060
2054 2629
2539 2172
2140 2201
2220 2046
2458 2054
2121 2290
2515 2401
2460 2324
2542 2604
2461 2026
1919 2365
2338 2461
2414 2462
2035 2313
2585 1980
2063 2604
2140 2492
2476 2240
2234 2410
2078 2240
2423 2560
2494 2583
2461 2054
2086 2560
1577 2302
2078 2386
2049 2286
2206 1962
2090 2532
2638 2477
2359 2190
2087 1959
2627 2364
2332 2328
2588 2246
2088 2576
2624 2561
2077 2408
2266 2287
2446 2112
1945 2038
2598 2047
2139 2624
1970 2537
2618 2217
1962 2266
1943 2331
2563 1938
1945 2081
1918 2504
2143 2135
2196 2002
2068 2555
2169 1916
2578 2240
2005 2220
2345 2007
2536 2190
2108 2253
2562 2049
2598 2543
1986 2123
2030 2484
2289 1718
2002 2294
2339 2216
2349 2466
2103 1997
2520 2492
2275 2489
2266 2607
2533 2294
2108 2381
2607 2429
2624 2059
1983 2154
2386 2631
2368 2377
2093 2363
2047 2215
2332 2282
2458 2247
2201 2347
2212 2363
2118 2201
2198 2246
2638 2504
2193 2656
1938 2329
2553 2564
2460 2359
2118 2188
2531 2203
2542 2060
2285 2053
2332 2144
2434 2274
2369 2606
2630 2188
1995 2346
2460 2200
2173 2146
2124 2083
2347 2134
2460 2655
2555 2598
2567 2187
1942 1983
2354 2462
2180 2153
2268 1928
2313 2325
2601 2331
2104 1962
2352 2477
2124 2139
2206 2623
2196 2032
2133 2384
2052 2153
2059 1997
2554 2131
2027 2447
1983 2229
2589 2187
2539 2624
2282 2652
2188 2607
2324 2492
2410 2201
2604 2601
1984 2591
2086 2309
2104 2446
2199 2194
2271 2542
2128 2042
2454 2266
1946 2278
2328 2598
2010 2267
2133 2440
2276 2376
2446 2213
2261 2507
2602 2354
2275 1953
2087 2102
2289 2291
2381 2026
2327 2072
1955 2511
2031 2145
2133 2102
2332 2191
2543 2137
2461 2344
2012 1995
1577 2508
2047 2087
2609 1948
2247 1926
2655 2404
2241 2180
2414 1971
2160 2114
2055 2323
2440 2023
2118 2121
2535 2245
2131 1963
2377 2068
2629 2068
2498 2419
2216 2615
1976 1991
1918 2348
2576 2460
2430 2266
2314 2497
2328 2471
2116 2102
2307 2553
2084 2104
2206 2201
2150 2059
2586 2578
2212 2551
1985 2237
2492 2392
2598 2635
2069 2201
2340 2586
2077 2331
2084 2347
2280 1959
2391 1983
2638 2201
2212 2331
2459 2396
2187 2347
2245 2487
2467 2601
2471 2475
2324 2030
2183 2327
2087 2246
2471 2445
136 2436
2579 1938
2355 2384
2385 2332
2348 2323
2630 2504
2124 2307
2355 2319
2068 2330
2328 2516
2538 2659
2149 2151
2559 2220
2436 2292
2010 2169
2540 2317
1968 2633
2462 2240
2542 2059
2390 2072
2188 2323
2233 2059
2418 2172
2002 2512
2344 2243
2549 2464
2343 1945
2291 2036
2179 2309
2600 2278
2131 2492
2042 2180
2381 2347
2377 2304
2032 2509
2573 2369
2073 2118
2257 2139
2184 2551
2150 2607
2228 2628
2630 2340
2097 2648
2566 1964
2117 1994
2430 2352
2137 2081
2031 2254
1991 2627
2299 1989
2500 2374
2336 2572
2059 2123
2174 2436
2446 2323
2369 2213
2370 2404
2649 1920
2543 2021
2330 2319
2568 2096
2244 1971
2598 2333
2331 2092
1946 2542
2428 2615
2117 2327
2418 2386
2264 2203
2060 2575
2268 2111
2509 2274
2492 2123
2258 2611
2396 2003
2623 2233
2359 2253
2616 1940
2407 2408
2597 2071
2073 2611
2531 2616
2233 2188
1941 2111
2540 2091
2149 2187
2419 2617
2131 2560
1962 2556
2021 2563
1914 2011
2201 2630
2638 1943
2280 1981
2180 2597
2462 2506
2558 2422
1962 2638
2598 2319
2359 2410
2264 2372
2165 2536
2549 2586
2365 1914
2598 2653
2138 2189
2103 2638
2308 2005
2216 2150
2323 2184
2090 2347
2600 2506
2593 2005
2073 2326
2257 2601
1941 2223
2068 1945
2461 2183
2047 2338
2352 2615
2109 1984
1947 1948
2199 2498
2369 2356
2304 2310
2191 2187
2081 2472
2172 2561
2202 2157
2582 2138
2617 2652
2643 2592
2030 2381
2183 2597
2102 2125
2626 2620
2278 2122
2615 1979
2190 2329
2395 2600
2068 2125
2138 2336
2188 2638
1986 2369
2258 2542
1920 2315
2447 2378
2138 2254
2078 2460
2448 2313
2033 2150
2593 2323
2074 2131
2043 2309
1971 1984
2009 2538
2364 2016
1943 2115
2630 2611
2201 1979
2184 2623
2573 1925
2093 2253
2061 1919
2142 2561
2300 2262
2090 2112
2597 2338
2078 2602
2415 2652
2244 2414
2109 2240
2582 2133
2428 2324
2159 2006
2220 2507
2392 2309
2600 2326
1981 2026
2586 2069
2279 2543
2292 2102
2550 2353
2495 2059
2210 2573
2508 1920
2646 2190
2225 2006
2602 2504
2253 1917
2098 2037
2005 2200
2133 2026
2617 2132
2132 2471
2507 1985
2537 2222
2268 1995
1718 2196
2289 2183
2531 2389
2463 2267
2359 2077
2504 2381
2157 2538
2390 2285
2417 2180
2309 2348
2306 2069
2589 2508
2482 2212
1986 2300
2338 2336
2557 2637
2563 2376
2559 2575
2305 2047
2615 1971
2019 2007
2438 2643
2232 1926
2007 2646
1943 2601
2359 2352
2290 2276
2410 2646
2300 2084
2537 2279
2208 2292
2108 2131
2323 1962
2482 2504
2436 2543
2365 2583
2376 2428
2433 2218
2339 2218
2619 2244
2328 2390
1998 1957
2307 2578
2543 2268
2253 2340
2214 2265
2657 1998
2648 2583
2468 2408
2631 2233
2212 2240
1943 2140
2410 2561
1916 2039
2414 2559
2353 2190
2253 2430
2232 2635
1945 1959
1986 2550
2354 2078
2544 2135
2052 2273
2169 2149
1917 2037
2290 2460
2069 2573
2419 2289
1921 1980
2218 2467
2268 2283
2083 2233
2394 2068
2427 1966
2102 2203
2419 2117
2273 1939
2090 2213
2639 2027
2071 2498
1941 2507
1946 2218
2591 2078
2093 2586
2563 2430
2307 2414
2446 2046
2058 2123
2246 2491
2603 2101
2118 1946
2386 2655
2604 2446
2445 2616
2072 2137
2369 2212
2325 2603
2372 2511
2505 2453
2033 2056
2491 2087
2129 2577
2506 2359
2039 2289
2004 2447
2643 2283
2475 2133
2275 2299
2520 2118
2292 2396
2206 2115
2002 2007
2429 2334
2339 2103
2254 2247
2313 2628
2065 2384
2045 2253
2292 2117
2588 2642
2625 2600
2659 2626
1917 2430
1943 2340
2582 1948
2116 1999
2504 1971
2656 2107
2610 2312
2074 2150
2075 2282
2347 2354
2307 2607
1979 2551
2006 1980
2140 2090
2290 2237
2563 2307
2344 2128
2367 2081
2203 2616
2615 2307
2233 2563
2078 2624
2477 2131
1940 2246
2199 2075
2044 2429
2139 2308
2659 2004
2150 2392
2326 2489
2526 2600
2554 2150
2642 2471
2218 2409
2165 2423
2323 1986
1946 2212
2173 2049
1945 2582
2110 2390
2588 2194
2370 2324
1954 2202
2140 2123
2218 2464
2660 2009
2095 2213
2149 2572
2149 1465
1941 2630
2593 2395
2232 2194
2428 2308
2056 2504
2241 2399
2530 2087
2240 2112
2191 2134
2359 2139
1941 2615
2275 2347
2123 2323
1993 2103
2229 2086
2432 2222
2045 2386
2233 2328
2055 2499
2077 2504
2056 2607
2147 2478
2593 2276
2629 2471
2537 2598
2592 2279
1997 2045
2163 2224
2373 2277
2410 2299
2271 2414
2327 2372
2306 2030
2059 2563
1939 2292
2595 2527
2643 1940
2478 2391
2410 2414
2172 2601
2172 2489
2093 2104
2025 2620
1941 2521
2010 2071
2302 2598
2356 2188
1979 2131
2352 2561
2582 2519
1962 2630
2372 2509
1963 1929
2323 2172
2112 2005
2582 2498
2102 2273
2028 2643
2323 2275
2032 2254
2328 2327
2069 2253
2092 2423
2090 2083
2139 2430
2617 2327
2224 2398
2199 2176
2118 1983
2039 2215
2611 2542
2429 1966
2230 2313
2367 2461
2040 2326
2326 2604
2040 2567
2359 2244
2268 2223
2460 2600
2563 2485
2292 1939
2546 2638
2234 1942
2356 2619
1963 1918
2124 2323
2573 2625
1979 1946
2549 2409
2300 2037
1954 2187
2200 2575
2578 2423
2556 2005
2189 2429
2123 1986
2103 2631
2220 2112
2289 2211
2598 1945
2392 2593
2467 2139
2615 2468
2623 2334
2194 2176
2616 2629
2135 2511
2644 2440
2222 2272
2405 2173
2000 2639
2087 1955
2410 2376
2112 2478
2446 1966
2088 2601
2411 2047
2271 2356
2624 2190
2604 2578
2027 1972
2266 2593
2428 2561
2030 2521
2593 2237
2284 2620
2433 2033
2069 2240
2005 2624
2218 2240
2149 2629
2047 2049
2555 2132
2118 2287
2344 2384
2198 2143
2194 2329
2464 2575
2271 2084
2218 2060
2111 2333
1981 2390
1930 2260
2610 2531
2480 2176
2444 2622
2102 1577
2624 2261
2183 2294
2147 1983
1943 2467
2055 2142
2455 2126
2071 136
2343 2052
2213 2324
2005 1993
1962 2408
2624 2586
2087 2368
2370 2638
2077 2308
2138 2496
2154 1963
2644 2317
2050 1980
2074 2095
2304 2555
2188 1993
2011 2192
2144 2196
2516 2471
2088 2395
2609 2153
2218 2446
2240 2464
2215 2259
2088 2240
2604 2055
2600 2495
1985 2449
1964 2219
2356 2083
2126 2577
2461 2047
2336 2203
2586 2619
1935 2659
2282 2555
2458 2338
2159 1991
2005 2615
2244 1983
1929 2573
2489 2340
2395 2201
2254 2617
2180 2068
1718 2461
2510 2304
2307 2201
1985 2139
2220 2602
1968 2006
2309 2200
2471 2072
1983 2539
2276 2374
1971 1941
2340 2122
2598 2151
2307 2123
1718 2330
2146 2411
2319 2191
2191 2233
2630 2353
2170 2399
2151 2649
2045 2414
2229 2220
2304 2389
2200 2139
2210 2266
2226 1964
1922 2412
2408 2624
2460 1993
2247 2194
2150 2347
2384 2133
2172 2201
2226 2345
2233 2206
2091 2448
2507 1971
2307 2257
2287 2118
2553 1979
2142 2055
2072 1970
2464 2184
2525 2047
2552 2112
2206 2354
2069 2575
2433 2347
2020 2069
2333 2087
2188 2266
2083 2299
2642 2295
1998 2097
2536 2574
2352 2200
2590 2240
2604 2033
2295 2224
2273 2294
2121 2460
2086 2334
2513 2349
2038 2637
2081 2191
1923 2318
2310 1923
2600 2077
2628 2313
2555 2161
2221 1981
2159 1980
2095 2407
2420 2598
2043 2409
1985 1971
2327 1939
2191 2224
2492 2142
2498 2512
2532 2560
2007 1981
2213 2206
2191 2343
2306 2630
2383 2428
2116 2645
2125 2068
2153 2279
2343 2282
2354 2478
2090 2462
2630 1966
2395 2369
2072 2509
2337 2494
2032 2087
1962 2233
2333 2191
2229 2213
2302 1994
2147 2590
2201 2093
2084 1917
2500 1943
1997 2551
2329 1971
2364 1919
2359 2482
2188 2601
2339 2482
2091 2105
2504 2546
2333 2438
2300 2078
2201 1985
2240 2409
2351 2529
2511 1923
2158 2474
2062 1970
1972 2447
2061 2297
2121 2409
2407 2631
2625 2287
2399 2163
2583 2640
2042 2250
1925 2045
2467 2020
2201 1942
2638 1993
2275 2590
2324 1941
1983 1929
2500 2638
2116 2378
2040 2150
2154 2408
2125 2102
1979 2552
1995 1957
2132 2246
2610 2247
2062 2029
2415 2511
2115 2037
2435 2494
2172 2363
2588 2007
2018 2116
2485 2477
2111 2038
2557 2047
2543 2385
2306 2354
2083 2428
2646 2500
2508 2194
2551 2546
2649 2377
2451 1981
2138 2071
2187 1920
2209 2117
2509 2461
1986 2139
2102 2052
2330 2436
2557 2425
2203 2588
2262 1982
2046 2376
2302 2511
2254 2144
2331 2030
2307 2271
2366 2133
2658 2024
2521 2073
2102 2547
2347 2561
2306 2139
2054 2087
1971 2579
2288 2189
2586 2323
2042 2254
2653 2588
2131 2154
2108 2140
1971 2363
2573 2056
2324 2348
2303 1986
2571 1941
2553 2423
2229 2043
2434 2280
2275 2033
2533 2032
2142 2467
2326 1963
2276 2563
2593 2489
2499 2140
2556 2395
2463 2511
2140 2495
2358 2099
2473 2612
2530 2560
2287 2625
2378 2284
2485 2504
1998 136
1953 2646
2554 1979
2042 2434
2056 2037
1983 2257
2234 2393
2549 2115
2095 2060
2398 2542
2010 2151
2354 2564
2496 2134
2072 2384
2058 2623
2223 2608
1925 2521
2097 1951
2172 2122
2221 2075
2581 2498
2264 2597
2058 2131
2063 2237
2597 1926
2449 2334
2061 2633
2184 2395
2411 2488
2273 2588
2266 2058
2250 2643
2183 1941
2252 2177
2462 2381
2543 2165
2408 2356
2536 2410
2390 2327
2549 2309
2547 2007
1972 2620
2509 2273
2004 2660
2659 2159
1465 2516
2193 2335
2619 2549
2608 2419
2539 2615
2376 2115
2253 2410
2274 2344
2117 2336
2539 2123
2509 2510
2150 2104
2328 2282
2340 2311
136 2378
2575 2142
2370 2654
2524 2526
2482 1983
2660 2024
2525 2145
2502 2187
1917 2638
1986 2142
2285 2567
2187 2198
2131 2404
2555 2491
2328 1926
2061 1950
2191 1994
2374 2395
2111 2135
2133 2176
2147 2576
2445 2330
2026 2592
2126 2120
2302 2461
2045 2354
2323 2433
2641 2642
2469 2309
2611 2631
2200 1983
2218 2131
2086 2172
2339 2521
2152 2146
2074 2123
2471 1916
2203 2149
2585 2202
2188 2084
2418 2150
2469 1943
2169 2384
2063 1979
2093 2058
2525 2419
1925 2551
2609 2111
2108 2430
2213 2391
2149 2203
2554 2172
2282 2279
2143 2567
2086 2154
2374 1953
2620 1980
2597 2138
2183 2472
2048 2211
2592 2344
2183 136
2309 2619
2592 2394
1920 2241
2601 2564
2339 2429
2187 2223
1960 2488
2611 1979
2039 2336
2430 1946
2525 2425
1984 2446
2131 2190
2282 1994
2642 2268
2233 2559
1975 2175
2142 2410
2404 2504
2625 2590
2020 2093
2654 2271
2111 2420
2542 2611
2331 2615
2406 2214
2363 1979
2247 1940
1943 2300
2159 2171
2268 2330
2249 2491
2608 2280
2519 2223
2620 2585
2311 2404
2429 2093
2123 2309
1991 2364
2611 2213
2492 2139
1942 2142
2274 2509
2560 2499
2233 2165
1918 2590
2237 2593
2064 2410
2611 2190
2118 2309
2502 2135
2363 2033
1966 2037
2495 2275
2412 2260
2289 2224
2340 2593
2472 2187
1995 1998
2556 2045
2084 2575
2394 2434
2549 2140
2498 2292
2464 2374
2638 2354
2143 2616
2122 2154
2476 2303
2126 2070
2183 2345
2090 1918
2121 2468
2201 2210
2124 1997
2102 2010
2438 2396
2465 2653
2559 1983
1971 2374
1954 2509
2188 1943
1941 2247
2520 2216
2229 2115
2201 2552
2619 2040
2352 1962
2488 2317
2533 2445
2529 2351
2026 2087
1917 1985
2376 2258
2086 1984
1941 2381
2084 2067
2220 2619
2184 2334
2149 2199
2261 2601
2369 2602
2478 1917
2409 2083
2409 2299
2600 2299
2355 2246
2124 2638
1962 2549
2085 2091
2482 2370
2095 2090
1917 2520
2608 2054
2024 2157
2615 2561
1966 2468
2348 2556
2213 2142
2083 2005
2617 2292
2253 1986
2633 1980
2390 2132
2339 2404
2629 2133
2296 1926
2327 2294
2112 2564
2411 2317
2555 2282
2467 2083
2216 2352
2404 2552
2117 2344
2589 2451
2495 2559
2150 2520
2103 2392
2082 2120
2133 2199
2559 2381
2133 2250
2002 2169
2609 2420
2435 2027
2640 2660
1971 2624
2103 2521
2174 2296
2139 2112
2521 2542
2468 2485
2001 2000
2371 2342
1971 2427
2475 2598
2376 1943
2188 2578
2101 2396
2037 2188
2381 2266
2630 2352
2426 2444
2585 2022
2258 1917
2578 2098
2216 2058
2590 2210
2414 2484
1984 2526
2467 2218
2153 2148
2366 2214
2578 2560
2326 2210
2555 1577
2194 2509
2590 2492
2123 2090
1929 2140
1962 2257
2592 2384
2161 2081
2038 2384
2518 2096
2289 2151
2433 2352
2376 2172
2593 2164
2591 2164
2351 2616
2543 2046
2347 2087
2446 2604
2212 1943
2556 1942
2113 2614
2477 2561
1945 2138
2616 2032
2299 2188
2409 2410
2072 2555
2659 2658
2563 2347
2184 2083
2293 2319
2115 2352
2192 2640
2257 2593
1946 2392
2371 2322
2001 2640
2559 2043
1926 2537
2602 2495
2248 1990
2264 1932
136 2636
2037 2520
2324 2271
2528 2313
2302 2117
2370 2140
2604 2507
2555 1959
2575 2369
2592 2537
2428 2136
2033 2381
2020 2210
2201 2290
2320 2490
2302 2127
2351 2509
2352 2573
2311 2266
2549 2579
2597 2330
2533 1948
2237 2090
2649 2617
2037 2103
1945 1940
2307 2600
2642 2282
2409 2339
2577 2231
2446 2414
2371 2197
1918 2271
1938 2615
2032 2007
2642 2176
2326 2492
1947 2241
2551 2201
2310 2117
2007 2343
2229 1993
2200 2046
2429 2058
2399 2617
2606 2655
2117 2183
2478 2383
2218 2331
2546 2074
2601 2212
2408 2307
2359 2560
2600 2078
2031 2283
2292 2169
2200 1943
2276 2121
2573 2253
2153 2138
2283 2117
1984 2060
2202 2657
2521 2212
2126 2160
2560 2311
2084 1946
2540 2126
2469 1983
2138 2512
2404 2393
2462 2078
2109 2098
2488 2107
2454 1966
2092 2409
2428 2307
2102 1926
2278 2055
1985 2290
2154 2104
2582 2007
2395 2590
2215 2223
2448 2129
2521 2460
2059 2276
2261 2212
1929 2395
2516 2054
2352 2604
2201 2499
2087 2471
2261 2237
2638 2606
2109 2655
2176 2068
1926 2273
2530 2268
2223 2328
2396 2537
2223 2567
2438 2054
2213 2188
2419 2047
2174 2471
2131 2323
2374 2433
2536 2266
2571 2101
1939 2282
2201 2329
2329 2624
2323 2395
2300 2576
2154 2060
2625 2118
2620 2346
2392 2188
2617 2196
1941 2328
2275 2326
2601 2485
2261 2115
2104 1941
1971 2423
2560 2526
2127 2007
2123 2624
1939 2183
2624 2077
2086 2504
2597 2302
1920 2302
2187 2283
2586 2469
2203 2174
2191 2087
1973 2202
2290 2218
2098 2560
2225 1931
2324 2278
2103 2376
2123 2363
2598 2588
2592 2032
2370 2103
1946 2428
2275 2218
1976 2006
1971 1997
2414 2611
2138 2191
2593 2309
2356 2033
1940 2294
1998 2225
2143 2510
2657 2192
2376 2549
2244 2428
2597 2285
2374 1943
2347 2333
2057 2608
1938 1946
2327 1926
2290 2077
2218 2561
2498 2155
2247 1945
2262 2067
2203 136
2240 2261
2586 1971
2506 2131
2336 2642
2078 2040
2299 2005
2077 2495
1983 2607
2433 1917
2384 2413
2107 2126
2287 2026
2128 2081
2554 2093
2036 2291
2404 1946
2331 1962
2088 2428
2040 2619
2080 2656
2461 2399
1948 2319
2179 2553
2642 2125
2464 2418
2154 2253
2603 2652
2183 2010
1962 2560
2617 2268
2414 2154
2586 2573
2261 2184
1985 2058
1976 2099
2378 2645
2229 2404
2589 2189
2615 2165
2376 2140
2150 2026
2184 2504
1938 2564
2118 2218
2030 2428
2052 2332
2237 2624
2141 2242
2067 2391
2184 1966
2274 2568
2022 1998
2520 2579
2590 2290
136 2027
2104 2088
2121 2578
2133 2325
2201 2591
2250 2319
1942 2037
1938 2593
2351 2555
2199 2463
1958 2639
2244 2115
2172 2556
2350 2147
2627 2645
2006 2297
1981 2617
2142 2574
2338 2264
2460 2423
1983 1986
2071 2246
2053 2243
2216 1943
2201 2271
2341 2160
2354 2551
2149 2399
2427 2476
2261 2323
2037 2040
1932 1948
1997 2290
2283 2372
1984 2506
2543 2180
2339 2055
2063 2381
2118 2354
2489 2623
2283 2385
2500 2123
2117 2072
2007 2211
2627 2284
2244 2575
1916 2283
2177 2282
2191 2510
2510 2285
2654 2409
2121 2103
2509 2498
2260 2129
2485 2021
2465 2187
2043 2354
2180 2102
2657 1968
2233 2172
2384 2463
2554 2033
2206 2551
2032 2283
2104 2090
2459 2192
2026 2128
2370 2253
2027 2157
1923 2328
2131 2073
2551 2410
2142 2086
2176 2141
2598 2138
2086 1929
1914 1931
2623 2043
1935 2346
2069 2638
2142 1966
2290 2188
2347 2261
2619 1938
2526 2184
1962 2309
2131 2460
2409 2074
2339 2477
2199 2203
2604 2045
2418 2551
2072 2133
2270 2557
2511 2501
2619 1985
2348 2354
2638 2139
2074 1966
2460 2306
2611 2112
2607 2624
2237 2408
2138 2292
1993 1966
2536 2078
2223 2582
1973 1968
1989 2520
1931 2659
2194 2010
1955 2133
2095 2624
2324 2499
2642 2054
2660 2645
2074 2590
2629 2087
2428 2300
2060 2495
2326 2370
2593 2093
2369 2600
2318 2310
2330 2224
2464 1953
2334 2040
2083 2619
2307 2504
2416 2031
2033 2165
2326 1985
2549 2624
2464 2395
2005 2037
1972 2116
2275 2040
2020 2278
2112 2500
2374 2504
2414 2257
2426 2170
2307 2276
1971 2619
2199 2007
1938 2140
2518 2054
2138 136
2319 1465
2042 2302
2121 1962
2460 1918
2354 2043
2200 2216
2331 2275
2657 2202
2384 2221
2510 2629
2122 2408
2224 2344
2201 2055
2133 2461
2121 2037
2128 1941
2609 2144
2005 1946
1970 2087
2014 1950
2007 2351
2283 1994
2179 1943
2266 2200
2539 2216
1957 2640
2147 2040
2590 1983
2155 2289
2579 2124
2540 1960
2237 2276
2348 2655
2625 2630
2539 2033
2423 2340
1968 1919
2561 2550
2504 2655
2339 2340
2502 2649
2500 2037
2309 1929
2071 2543
2313 2366
2537 2243
2308 2478
2040 2386
2183 2224
2038 2588
2198 2187
2232 2039
2110 2434
2235 2280
2369 2414
2477 2090
2573 2058
1929 2601
2555 2010
2660 1919
2184 2118
2653 2174
2323 2495
2081 1718
2564 2257
2608 2174
1986 2521
2542 2118
2172 2532
2064 2430
2150 1943
2506 2323
2615 2103
1938 2563
2153 2543
2201 2323
2229 2216
2123 2115
2378 1973
2616 2189
2468 1997
2619 2654
2123 2347
2410 2449
2324 2407
2417 2111
1990 2047
2559 2615
2512 2304
2142 2409
2451 2653
2282 2603
2539 2550
136 2319
2623 2237
2526 2624
2024 2004
2224 2279
2588 2653
2240 2430
2093 2602
2333 2250
2625 2593
2564 2504
2420 2294
2274 1947
2591 2276
2602 2339
2139 2005
2428 2381
1997 2154
1971 2329
2598 2465
1929 2104
136 2302
2283 2135
2083 2408
2516 2148
2024 1921
2348 1971
2288 2468
2353 1946
2254 2057
1929 2122
2087 2143
1990 2248
2433 2550
1946 2043
2654 1985
2623 2078
2161 2068
2011 2171
2025 1921
2495 2590
2335 2070
2431 2313
2477 2395
2334 2575
2578 2579
2498 2102
2409 2495
2331 2299
2241 2028
2351 2472
2063 2179
2526 2109
2461 1945
2137 2328
2018 2157
2484 1993
2208 2530
2631 2615
2586 2059
1941 2058
2395 2309
2052 2246
2564 2121
2543 2491
2095 2276
1983 2615
2638 2521
2553 2213
2466 2207
2602 2112
2062 1939
2307 2115
2307 2563
2352 2045
2315 2597
2046 2030
2061 1972
2317 2577
2095 2611
2623 2093
1577 2169
2553 1917
2640 2202
2593 2150
2081 2134
2430 2200
2516 2002
2300 2092
1926 2246
1998 2365
2327 2031
2138 2038
2042 2516
1957 1998
2469 2354
2410 2033
2137 2629
2029 2605
2299 2654
2311 1946
2037 2084
2075 2280
1925 2356
2183 2026
2122 2108
2069 2140
2110 2199
2475 2151
2629 1920
2433 2423
2590 2500
2045 2563
2591 2237
1918 1997
2101 2367
2372 2038
2327 2224
2482 1979
2319 2071
2005 2064
2117 2471
2108 2410
2463 2292
2348 2306
2445 2328
2521 2409
2214 2313
2647 1921
2259 2592
2589 2203
2189 2067
2436 2533
2454 2545
2395 2150
2122 2188
2081 2176
2408 2492
2131 2408
2537 2589
2637 2133
2395 2140
2056 2257
2295 2543
2151 2111
2404 2109
2434 2537
1962 2624
2619 1941
2247 2153
2594 1945
2131 2275
2176 2175
1975 2248
1966 2549
2073 2142
2460 1917
1985 2423
2601 2063
2038 2198
2095 1971
2300 2326
2391 2600
2091 2313
2607 2560
2381 2122
2508 2283
1926 2032
2445 2032
2153 1959
2125 2463
2409 2376
2480 1923
1962 2363
2218 2201
2078 1985
2112 2093
2322 2156
2404 2499
2150 2340
2486 2207
2323 2551
2549 2573
2384 2597
1932 2315
2589 2289
2555 1955
2043 2507
2458 2594
2073 2229
2475 2191
2309 2602
1979 2073
2300 2278
2584 2611
2347 2142
2417 2068
2363 2370
2353 2469
2194 2588
2240 2266
2030 2500
2133 2598
2224 2203
2290 2543
2482 2551
2578 1941
2177 2081
2124 2590
1959 2072
1925 2543
2513 1988
2188 2579
1946 1962
2275 2410
2491 2199
2500 2606
2658 2022
2397 2570
2135 2081
2564 2040
2509 2415
2631 2460
1962 2353
2275 2593
2326 2115
1959 2508
1946 1918
2348 2237
2443 2266
2200 2115
2266 2619
2031 2327
2290 1989
2261 2655
2164 1925
2037 2043
2047 2267
2142 2504
2612 2031
2083 2542
2419 2068
2653 2302
2059 2154
2299 2374
1577 2343
2118 2623
2150 2140
2087 1948
2020 2073
2409 2088
2025 2657
2157 1927
2309 2446
2312 2616
2075 2511
2154 2266
2056 2059
2464 2257
2460 2307
1917 2086
2587 1922
2002 2283
2026 2161
2285 2273
2125 2161
2244 2184
2593 2244
2131 2489
2494 1998
2085 2322
2138 2533
2296 2612
2502 2145
2276 2005
2244 1963
2176 2054
2150 2601
2097 2024
2037 2600
2040 1953
2630 1918
2148 2187
1991 1980
2118 2184
2499 2611
2179 2074
2246 2282
2268 1955
1939 1945
2471 2161
2363 1993
2492 2556
2408 2033
2250 2399
2637 2610
2102 2436
2035 1930
2007 2240
2010 1947
2525 2310
2020 2307
2093 2543
2491 1941
2385 2111
2201 2164
1954 2582
2024 2018
2278 1966
2536 2542
1920 1955
2537 2161
2386 2090
2063 2154
2024 1980
2078 2631
1964 2557
2336 2143
2597 2203
2098 2122
2475 2081
2411 2580
2135 2533
2464 1997
2038 2053
2237 2383
2551 2098
2212 2414
2458 2294
2090 2165
2394 2384
2410 2324
2594 2241
2394 2183
2417 2072
1941 2131
2306 2586
2115 2409
2246 2304
2300 2150
2179 2495
2630 2118
1920 2347
2209 2416
2196 2302
2270 2209
2532 2625
2124 2131
2050 2157
2069 2122
2615 2037
1955 2345
2276 2261
2148 2394
2108 2549
1923 2289
2031 2149
2009 1921
2610 2603
2368 1465
2586 1966
1959 1941
2411 2335
2068 2508
2376 2124
1979 2140
2240 2561
2340 2376
2147 2600
2363 2340
2275 2613
2425 2155
1955 2007
1960 2342
2048 2226
2352 1946
2310 2128
1971 2489
2532 2276
2289 2425
2187 2081
2084 2078
2537 2377
2604 2374
2415 2111
2090 2630
2237 2064
2123 2033
2542 2363
2578 2045
2005 2043
2073 2359
1979 2184
2184 2539
2330 2028
2102 2461
1962 1983
2579 2460
2573 2154
2137 2608
2363 2090
2428 2069
2213 1962
2109 2233
2557 2295
1972 2302
2309 2216
2310 2304
2560 2573
2093 2278
2047 2053
2254 1718
2327 1940
2045 2409
2607 2469
2282 2054
2165 2352
2509 2176
2477 2278
2342 2107
2040 2020
2114 2322
2549 2499
2203 2368
2484 2331
2146 2361
2308 2623
2521 2563
2507 2573
2335 2193
2405 2126
2020 2521
1992 2486
1946 2086
2098 2615
2353 2607
2095 2619
2532 2395
2200 2092
2068 2643
2037 2347
2063 1959
2351 2471
2132 2390
2645 1919
2508 2042
2555 1940
2550 1997
2133 1718
2345 1955
1941 2063
2083 2586
2174 2491
2477 1943
2428 2553
2002 2347
2267 2282
2267 2592
2229 2212
2520 2266
2484 2591
2348 2074
2282 2302
2476 2056
2233 2037
2597 2007
2600 2630
2600 2216
2359 2115
2330 2589
2140 2098
2338 2223
2356 1943
2446 2124
2464 2611
2564 2216
1966 2339
2240 1953
2033 2623
2539 1986
2631 2220
2061 2159
2386 2201
2560 2613
2601 2646
2352 2244
1981 2003
2484 2123
2421 2168
1963 2098
2391 2584
2445 2372
2156 2341
2611 2005
2548 2558
2389 2247
2507 2150
2331 2410
1989 2218
2582 2567
2095 2200
2643 2463
2414 2059
2283 2292
2063 2266
2385 2268
2539 2381
2348 2495
2323 2600
2410 2611
2394 2264
2307 2077
2348 2630
2479 2652
2504 2339
2436 2133
2237 2464
2409 1925
2543 2144
2520 2074
2482 2430
2461 2377
2478 2067
2604 1962
2103 2074
2060 2154
2338 2151
2507 2625
2348 1983
2643 2081
2557 2325
2553 2131
2423 2489
2459 2202
2602 2104
2476 2300
2385 2102
2253 2118
2045 2090
2019 2387
1947 1959
2171 2620
2026 1926
2140 2539
2492 2554
2573 2118
1997 2654
2414 2543
2404 2233
2092 2206
2030 2290
1996 2017
2654 2363
2257 2354
2369 2040
2574 2331
2323 2108
2630 2037
2043 2623
1926 2082
2053 2436
1914 2027
2477 2521
2076 2444
1984 2539
2499 2201
2149 2344
2063 2058
2615 2550
2276 2600
2602 2063
2338 2458
2139 1946
2494 136
2573 2308
2489 2586
2615 1962
2276 2606
1962 2464
2174 2087
2189 2081
2550 2339
2135 2279
2554 2374
2039 2203
2608 2081
2021 2233
2336 2054
2232 2268
2224 2273
2414 2630
2507 2655
2607 2553
2060 2240
2553 2084
2081 2283
2206 2521
2462 2418
1946 2074
2366 2345
2208 2462
2188 1986
2002 2198
2611 2462
2165 2172
1989 2257
2463 2254
2573 2556
2604 2363
2450 2614
1934 2341
2173 1990
2241 2232
2354 2560
2637 2211
2653 2289
2005 2428
2271 2276
2374 2109
2361 2047
2655 2469
2552 2409
2524 1948
2065 2302
1945 2191
1577 2283
2611 2615
2020 2654
2615 2098
2253 2408
1993 2615
2370 2550
2150 2331
2323 2546
2386 2638
2477 2030
2403 2335
1577 2529
2241 1577
2374 2560
1997 2495
2328 1939
2547 2398
2625 2655
2237 2043
2235 2081
2176 2087
1986 2210
2464 2363
2594 1947
2484 2611
136 2643
2586 2446
1999 2378
2550 1993
1947 2081
2131 2551
2576 2590
1932 2028
1958 2364
2010 2081
1921 1919
1997 2369
2435 2018
2169 2052
2604 2430
2446 2086
2646 2559
2610 2389
2184 2220
2428 2359
2471 2187
1943 2624
2352 2257
2407 2625
2340 2543
1984 2607
2275 2520
2347 1929
2011 1998
2461 2282
2557 2642
2151 2589
2374 2619
1921 2297
2266 2430
2064 2590
2090 1938
2182 1944
2028 2292
1959 2279
2328 2537
2096 2432
1985 2056
1971 2150
2561 1966
2655 2112
1971 2216
2093 2619
2307 2290
2542 2552
2638 2340
2558 2618
2546 2600
2344 2273
2180 1920
2037 2240
2216 2064
2053 2264
2545 2056
2143 2176
2323 1989
2120 2577
2433 2290
2560 2655
2047 2498
2621 2439
2495 2564
2144 2199
2501 2384
2233 2369
2418 1953
1926 2291
1926 2325
2169 2153
2200 1918
2409 2005
1917 2329
2549 1966
2484 2220
2108 2363
1916 2512
2379 2226
2614 2402
2185 2289
2619 2615
1971 2059
2109 2521
1953 2363
2485 2244
2172 2150
2151 1920
2653 2183
2440 1964
2147 2476
2233 2499
2337 2346
2604 2165
2201 2414
2408 2201
2047 2173
2551 2122
2253 2624
2491 2635
2516 1941
2398 2319
2331 2253
2578 2020
2123 2573
2451 2280
2659 2126
2361 2166
1919 2024
2237 2578
2218 2046
2118 2083
2234 2266
2133 2169
2235 2509
2559 2210
2507 1929
2153 2511
1945 2510
2354 2210
2604 1941
2387 2478
2264 1981
2069 2654
2287 1918
2333 2039
2347 2395
1939 1947
2071 2471
2039 2471
2065 2608
2213 2369
2142 2059
1938 2536
1984 1971
2395 2414
2206 2353
1954 2640
2088 2430
2567 2461
2122 1946
2570 1956
2237 1963
2482 2123
2264 2280
2023 2488
2077 2136
2331 2485
2512 2427
2659 1976
2418 2045
2485 2549
2543 2592
2563 2329
1962 2504
2551 2063
2376 2404
2555 2268
2140 2410
2322 1926
2364 2640
2271 2495
2206 2575
2478 2118
2289 2440
2064 2216
1989 2460
2607 2271
2603 2434
2135 2137
1985 1918
2099 2510
2559 2556
2278 2093
2615 2573
2498 2174
2319 2072
2057 2053
1983 2575
2398 1932
2025 1935
2154 2489
1985 2469
2385 1969
2187 2032
2315 2347
2005 2611
1718 2491
2504 2112
2085 2232
2370 2240
2084 2499
2578 1943
2520 2056
2224 1718
2224 2038
2242 2325
2642 2151
2592 2282
2419 1916
2065 2183
2144 2398
2615 2290
2560 2492
2151 2169
2103 2410
2563 2184
1919 2640
2063 1943
2629 2273
2137 2510
2266 2489
2504 1925
1954 1999
2039 1916
2237 2340
1962 2477
1946 1979
1985 2179
2582 2510
2268 2071
2201 2543
2511 2336
2229 2142
1577 1932
2218 1993
2445 1955
2520 2190
2359 2033
2506 2172
2511 1970
2274 2075
1979 2058
2414 2200
2026 2398
1941 2138
1916 2002
2471 2649
2103 2381
2540 2361
2550 2212
1993 1979
2072 2144
2164 2142
2435 2000
2414 2090
2072 2399
2073 2386
2420 2032
2030 2467
2122 2407
2471 2196
2601 2090
2276 2630
2417 2157
1993 1946
2579 1917
2266 2020
2247 2199
2330 2223
2030 2638
2083 2520
2549 2299
1962 2188
2489 2369
2577 1933
2266 2469
2054 2194
2468 2404
2063 2206
2346 2001
2543 2216
2319 2026
2624 2542
2463 2282
2592 2609
2430 2306
2556 2464
2039 2169
2443 2147
2136 2507
2150 2069
2038 2241
1938 1962
2039 2567
1939 2390
2053 2420
2032 2332
2206 2165
2209 2232
2458 2007
2550 2586
2196 2609
2492 2564
2564 2095
2045 2462
1971 2290
2409 2064
2110 2111
2093 2492
2111 2653
2081 2384
2214 1926
2198 2419
2123 2122
2619 2564
2600 2462
2369 2423
2430 2244
2172 2257
1984 1986
2543 2561
2118 2604
2515 1988
2139 2631
2518 2419
2600 2423
2194 2417
2172 2478
2090 2623
2446 2278
2077 2240
2282 2254
2268 1577
2485 2287
2464 2552
2139 2485
2142 2306
2257 2554
2287 2363
2472 1968
2101 1941
1983 1943
2088 2206
2118 1918
2586 2131
2090 2086
1988 2349
2359 2093
2150 2078
1973 2364
2300 2369
1577 1940
2064 2543
1970 2438
2042 2215
2148 2328
1919 2364
2641 2525
2526 2381
2056 2615
2537 2384
2467 2409
2138 2081
2223 2183
1984 2030
2461 2597
2183 2246
2398 2511
2244 2063
2043 2093
2398 2608
2564 2408
2078 2077
2556 2229
1993 1962
1947 2068
2240 2376
2420 2451
1991 1995
2431 2558
2143 2279
2321 2341
1940 2028
2484 2324
2206 2020
2185 2031
2485 1985
2118 2606
2132 2394
2461 1932
2430 2449
2374 2142
2279 2315
2451 2292
1985 2190
2262 2506
1985 2172
2054 2509
2482 1941
2602 2630
2013 2297
2520 2381
2551 2229
2593 2578
2368 2111
2254 2268
2340 2210
2151 2143
2043 2506
2508 2598
2433 2601
2028 2516
2213 2201
2567 2285
2300 2542
2063 2184
2253 2290
1962 2600
2056 2485
2495 2391
2578 2504
2591 2218
2336 2042
1929 2073
1964 2514
2395 2460
2180 2191
2615 2055
2176 2145
2228 2411
1936 2388
2549 2109
2386 2287
2592 2508
2561 1993
2604 2287
2302 2125
1945 2101
2184 2150
2343 2536
2605 2516
1962 2123
2093 2433
2031 2473
2090 2037
2625 2347
2018 2171
2196 2071
2028 2372
2469 2363
2601 2546
2601 2323
2043 1962
2060 2549
2495 2073
2567 2508
2593 2348
2133 2138
2464 2348
2386 2553
2290 2602
2043 1997
2464 2536
2462 1941
2629 2544
2180 2629
2073 2278
1999 2297
2030 2201
2379 2566
2463 2125
2370 2154
1973 2061
2078 2410
2638 2339
1993 2542
1920 2475
2561 2611
1947 1939
2601 2154
2601 2237
2504 2090
2032 2111
2509 1955
2020 2220
2290 2654
2306 2124
2653 2068
2221 1947
2598 2592
2266 2090
2290 2324
2385 1577
2464 2550
2329 2078
2625 1985
2619 2593
2482 2154
2308 2142
2561 2276
2398 2259
2201 2504
2356 2395
1954 2538
2103 2201
2368 2279
2045 2287
2118 2190
2036 2265
2328 2196
2208 1985
1918 2026
2251 2156
2356 2477
2395 2188
2369 2363
1999 2640
2063 2655
2365 1927
2314 2107
2507 2206
2629 2072
2410 2233
1993 2499
2436 2617
2336 2567
2404 2477
2002 2068
2459 2645
1970 2598
2414 1946
2384 2039
2289 2149
2469 2478
2506 2376
2131 2348
2612 2523
2047 2503
2543 1943
2039 2223
2414 2103
2555 2643
2030 2370
2573 2059
2368 2032
136 2183
2362 2425
2533 2127
2511 2280
2190 2579
2184 2308
2374 2278
2115 2492
2083 1925
2182 2242
2391 2172
2268 2319
2542 1979
2508 2463
2465 2071
2169 1945
2509 2351
2294 2199
1989 2551
2095 2604
2090 2206
2368 2143
2338 2609
2183 2102
2112 2638
2292 2048
2089 2488
1919 1921
2266 2164
1998 1919
2266 2356
2464 2326
2200 2359
2615 2446
2271 2593
2409 2430
2368 2509
2276 2499
2432 2235
2215 1985
2176 2384
2471 2473
2591 2499
2350 2363
2090 2188
2124 2063
2053 2508
2612 2085
2304 2072
2233 1929
2453 2406
1962 2060
2169 2472
2002 2588
2507 2542
1979 2165
2606 2233
2278 2542
2384 2394
2039 2047
2337 2447
2564 1983
2598 2501
2062 2280
1961 2301
2567 2279
1939 2222
2509 2128
2278 1987
2317 2342
2557 2641
2521 2550
2196 1945
2055 1962
2506 2234
2007 2338
2532 2559
2275 2578
2188 2090
2222 2111
1994 2384
2539 2549
2095 1925
2542 1971
2511 2101
2123 2136
2242 2031
2471 2127
1976 1928
2607 2495
2083 1918
2549 2308
2414 1962
2543 2117
2201 2020
2054 2180
2292 1916
2550 2655
2172 2404
2428 2374
1970 2274
2109 2329
2161 2367
2501 2283
2553 2354
2212 2095
2326 2646
1994 2338
2235 1939
2376 2593
2551 2428
2042 1941
2090 2600
2272 2209
2324 2549
2054 2588
2150 2179
2184 2550
2504 2331
2196 2176
2047 2226
2300 2602
2240 2500
2150 2353
2212 2088
2054 2224
2600 2410
2215 2417
2511 2398
2452 1923
2077 2352
2264 2135
2068 2153
2369 2492
1986 2556
1951 2297
2083 2414
1985 2005
2347 2542
2348 2532
2103 2363
2472 2144
2394 2509
2115 2244
2033 2244
2462 2410
2423 2395
2338 1465
2299 2030
2103 2307
2053 2509
2340 2244
2491 2053
2555 2351
2356 2212
2121 2064
2206 2573
2653 2384
2071 2007
2039 2609
2543 2615
2509 2629
2080 2313
2179 2124
2432 1947
2404 2200
2374 2578
2623 2624
1986 2536
2408 2086
2189 2144
1932 1945
2039 2629
2254 136
2140 1938
2647 2009
2379 2068
1931 1995
2172 2574
2216 2586
2366 2325
1951 2011
2359 2492
2647 2004
2611 2184
1923 2272
2602 1938
1994 2330
2499 2442
2381 2600
2392 2410
2597 2247
2434 2117
2037 2083
2055 1986
2600 2574
2463 2068
1921 2024
2625 2077
2109 1971
2199 2215
2278 2115
2292 2588
2093 2043
2423 2261
2564 2602
2592 2087
2638 2469
1920 2062
2278 2433
2074 2408
2564 2478
2435 2009
2377 1947
2339 2392
2111 2149
2446 2037
2078 2307
2220 2123
2227 2313
2060 2073
2520 2602
2244 2278
2115 2468
2210 2414
2333 2177
2423 2363
2342 2411
1971 2578
1942 2303
2326 2240
2507 2591
1955 2117
2414 2077
2046 2354
2111 1987
2348 2369
2299 2200
2203 2199
2307 2063
2332 2199
2071 2319
1938 2654
2076 2425
1465 2289
2335 2238
2361 2146
2203 2223
2026 2547
2352 2423
2381 2118
2148 2032
2410 1938
1939 2101
2023 2236
2630 1943
2271 2359
2593 2460
2643 2117
1948 2292
2654 2123
2292 2111
2585 1957
2032 2445
2363 2121
2363 2654
2234 2576
2109 2275
2140 2604
2212 1971
2650 1992
2052 2133
2294 2332
2328 2137
2469 2495
2542 2201
2289 2148
2602 2218
2500 2043
1718 2471
2093 2395
2654 2033
2330 2279
2346 2620
2371 2181
2409 2218
2347 2506
2282 2643
1997 2561
2627 2633
2068 2537
2408 2005
2064 2108
2117 1932
2369 1917
2520 2307
2544 2117
2288 1964
2464 2392
2351 1465
2433 2552
2419 2155
2218 2546
1951 2647
2564 2655
2553 2095
2561 2043
1925 2124
1928 2027
2134 2169
2309 2469
2638 2543
2199 2143
1947 2475
2488 2129
2028 2054
2368 2434
2543 2572
2573 1938
1941 2464
2502 2605
2607 2063
2433 2307
2331 2059
2462 2132
2495 2601
2410 2037
2512 2138
2598 2062
2063 2414
2503 2173
1994 1959
2625 2124
2599 2465
2021 1985
2631 1946
2129 2540
2229 2536
2345 2280
2384 2153
2063 2218
2323 2553
2095 2088
2030 2121
2211 2325
2218 2615
2370 2410
2586 2093
2029 2344
2199 1941
1941 2102
2468 2005
2361 1964
2188 2179
2464 2103
2087 1465
2083 1943
2117 2463
1938 2601
2347 2409
1918 2467
1718 1916
2331 2131
2206 2140
2550 1986
1993 1971
2549 2550
2142 2033
2430 2429
2082 2152
2449 2303
1959 2274
2287 2088
2521 2506
2261 2131
2184 2124
2328 1577
2434 1916
2559 2164
2572 2215
1942 2387
2112 2309
2040 2308
1948 2338
2451 1994
2029 2325
2465 2224
2597 2445
2540 2557
2075 2394
2266 2446
2370 2086
2615 2347
2576 2088
2028 2247
2117 2420
2104 2326
2064 1929
2175 2642
2180 2007
2235 2458
1923 2117
2078 2123
2054 2302
2416 2310
2512 2389
2331 2619
2463 2419
2485 2266
2154 2184
2420 2642
2033 2543
2071 2087
2557 2226
2536 2369
2309 2123
2343 2588
2336 2511
2365 2346
2315 2191
2055 1917
2615 2526
2363 2043
2200 2492
2273 2032
2361 2286
2126 2236
1948 2282
2478 2602
2148 2224
1979 2206
2229 2206
1986 2468
2143 2028
2278 2063
2095 2233
2174 1959
1953 2543
2593 2139
1959 1985
2549 2601
2083 2307
2299 1985
2203 2189
2489 2253
2582 2295
2218 2578
2206 2542
2112 2095
2340 2121
2184 2339
1962 2324
2492 2190
2583 1991
1983 2507
2047 2458
2172 2108
2381 1986
1941 2642
2211 2205
2229 2104
2283 2463
2509 2148
2081 2194
2573 2030
2063 2150
2600 2074
2172 2591
2547 2053
2602 1985
2539 1941
2030 2591
2511 2062
2056 2287
1993 2561
2601 1971
1971 2550
2272 2642
2603 2325
2484 2299
2302 2028
2419 2512
2346 1995
2324 2408
2376 2624
2326 2374
2037 2507
2054 2096
2095 2275
2076 2426
2492 1943
2404 2607
2506 2468
2560 2484
2246 2174
2057 2372
2531 2529
2093 2428
2109 2069
1985 2115
2630 2266
2447 1928
2048 2128
2176 2419
1920 2465
2327 2368
2536 1929
2369 2446
2043 1918
2629 2336
2282 2465
2575 1943
2491 2588
1981 2592
2631 2542
2087 2039
2123 2549
2102 2169
2459 2284
2144 2330
2461 1947
2339 2287
2436 1948
2372 2384
2284 1951
2649 2241
2218 2077
2407 2602
2188 1989
2324 2088
2215 2508
2630 2307
2590 2104
2441 2558
2607 2352
2161 1959
2353 2370
2061 2202
2135 2128
2010 2283
2048 2155
2345 2068
2588 2461
2309 2478
1920 2028
2374 2414
2188 2615
2077 2275
2174 2187
2551 2606
2203 2643
1921 2459
2611 2237
2059 2418
2123 2551
2640 2225
2032 2384
1465 2530
2410 2083
1916 2344
2313 2126
2107 2587
1976 1998
2117 2187
2653 2458
2081 2533
2221 2222
2348 2233
2400 2292
2030 1986
2607 2601
2513 2207
2154 2271
2390 2617
2064 2428
2232 2047
2519 2125
2121 2550
2134 2254
2654 2354
2218 2306
2250 1954
2064 2623
2519 2295
2073 2543
2118 2037
2123 2559
1948 2125
2247 2254
2509 1959
2171 1968
2560 2501
2615 2386
2243 2199
2169 2304
2300 2460
2327 2419
2550 2043
2059 2121
2194 1465
2327 1981
2326 2311
2259 2194
2165 2229
2598 2498
2578 2308
1918 2551
2544 2042
2602 2084
2376 2339
2645 2647
2553 2578
2387 1966
2184 2064
2086 2261
1943 1938
2345 1926
2057 2047
2619 2056
2444 2401
2308 2586
2004 2647
2090 2625
2454 2542
2002 2511
2109 2074
2223 2372
2479 2344
2559 2095
2337 1927
2030 1997
2074 2278
2078 2423
2584 2391
1929 2500
1920 2259
1918 2559
2108 2464
2412 1937
2563 1971
2083 2433
2334 2020
2151 2149
2072 2394
2582 2068
2646 2654
2359 2233
1914 2585
2328 2087
2028 2463
2104 2409
2409 2630
2489 2602
2503 2049
2328 2199
2069 2395
2266 2506
2203 2547
2085 2341
2026 2347
1932 2609
2611 2348
2396 1981
2356 2201
2549 2240
2354 2271
2084 2326
2124 1979
1991 2157
2049 2313
2199 2588
2364 2494
2398 2047
2363 2543
2309 2190
2416 2610
2311 2258
2229 2499
2624 1985
2165 2464
2040 2590
2585 2159
1929 2638
2433 2551
2445 2007
2418 2550
2153 2042
2574 2021
1964 2042
2561 2477
2381 2308
2482 2184
2617 2222
2045 2347
2340 2590
2299 2381
2553 2407
2544 2463
2603 2501
2283 2169
2328 2180
2492 2520
2323 2376
2407 2216
2045 1983
2392 2509
2108 2037
2488 2448
2404 2506
2369 2521
2556 2244
2199 2071
1916 2642
2135 2264
1959 2002
2247 1939
2037 1997
2352 2619
2266 2037
2062 2319
2188 2550
2235 2434
2268 2047
2183 2028
2190 2482
2125 1939
2510 2038
2543 1920
2508 2053
2410 1984
2045 1938
1986 2084
1985 2334
2050 2538
2555 2127
1465 2135
2624 2108
2164 2253
2507 2311
2418 2433
2593 2266
1963 2077
2410 2409
2423 2326
2610 2117
2461 1920
2468 1920
2187 2302
2292 1920
2323 2140
2392 2121
2414 2045
2268 2594
2508 2543
2593 2200
2266 1953
2463 2042
2240 2216
2149 2555
2271 2150
1995 2004
2525 2642
2071 2332
2336 2215
2243 2132
2084 2387
2299 2324
2435 2645
2344 2598
2302 2581
2240 2030
2287 2090
2006 2639
2052 2072
2501 2396
2348 2356
2083 2602
2381 2323
2556 2575
2324 2462
2418 1917
2304 2475
2157 2365
2323 2381
2617 2458
2241 2567
2019 2092
2309 2212
2372 2572
2057 2336
2464 2489
2183 2283
2489 2604
2343 1916
1917 2542
2223 2153
2078 1929
2307 1993
2241 2319
2423 2069
1985 2489
2032 2273
2173 2540
1946 2104
2174 2434
2340 2136
2309 2206
2623 2210
2200 2477
2109 2324
2190 2131
2218 2404
1718 2328
2150 2334
2460 2500
2604 2299
2127 2250
2196 2328
2150 2188
1955 2608
2296 2209
2153 2434
2331 2631
2578 1983
2018 2016
2169 2189
2506 2206
2261 2326
2563 2546
2336 2649
2093 1966
2347 1947
2592 2057
2547 2203
2108 2600
2127 2343
2597 2135
2521 2410
2200 2353
2564 2058
2359 2526
2275 2611
2235 2594
2575 2069
2240 2154
2154 2118
2353 2554
2224 2302
2309 1993
2630 2200
2063 2539
2258 2257
2657 2365
1947 2052
1718 2588
2111 2259
2139 2521
2273 2111
1986 2218
2150 1979
2055 2370
2068 1465
1970 2283
2102 2087
2005 2060
2468 2611
1960 2126
2583 2494
2059 2602
2152 2085
2633 2022
2117 2102
2323 2392
2292 2384
2374 1966
2575 2218
2226 2209
2506 2190
2347 2344
1980 1973
2135 136
2468 2074
2545 2262
1942 2449
2068 1954
2611 2408
2579 2374
1976 136
2112 1986
2521 2492
2226 2366
2534 2659
2539 2464
1945 2649
2323 2086
2538 2116
2073 2043
2081 2415
2054 2344
2495 2348
2086 2323
2351 2643
2531 2610
2338 2327
2391 2552
2276 2329
2446 2347
2409 2021
2560 2615
2115 2560
1718 2436
2201 2495
1971 2237
2090 2063
1938 2624
2363 2063
2202 2006
2550 2574
2581 1966
1914 2657
2276 2074
2619 1929
2143 2472
1947 2319
1939 2081
2655 2184
2526 2484
2244 2095
2499 2172
2365 1973
2077 2190
2143 2250
2474 1965
2059 2553
1938 2237
2233 2083
2271 2131
2073 2237
2073 2200
2372 2125
2592 2438
2253 1929
2268 2249
2059 2500
2625 1943
2347 2259
2074 2088
2611 2507
2054 2223
2150 2386
2040 2369
2611 2326
2653 2138
1985 1986
2032 2518
2567 2199
2140 2084
2640 1928
2313 2411
2203 2343
2092 2350
2307 2078
2374 2073
2224 2543
2555 2047
2069 2340
2552 2324
2384 2608
2134 2026
2339 2088
2039 1577
2348 2229
2315 2117
2258 2150
2494 2024
2261 2370
2033 2074
2510 2196
2028 2384
2140 2339
2587 2424
2492 2200
2005 2559
2273 2328
1923 2475
2210 1946
2542 2261
2138 2039
1943 1917
2200 2040
2340 2551
2087 2250
2184 2261
1947 2384
2188 2574
1941 2030
2025 2633
2315 2338
1979 2376
2040 1929
2543 2420
2098 2331
2472 2068
2113 2313
2510 2235
2174 2199
1943 2043
2180 2183
2113 2100
2619 2563
2188 2276
2363 2253
2472 1920
2054 2327
2543 2143
1916 2151
2334 2216
2147 2271
2199 2555
2363 2123
2121 2428
2652 2110
2217 2100
2150 2408
2631 1953
2002 2598
2030 2115
2593 2607
2136 2539
2359 2074
2266 2560
2520 2258
2040 2309
2376 2276
2625 2495
2143 2273
2088 2074
2054 2451
2290 2340
2336 2592
1946 2261
1929 1918
1918 2043
2381 2240
2150 1986
2615 1918
2604 2468
2594 2355
2062 2629
2201 2631
2308 2131
2121 1966
1926 2071
2200 2339
2142 1929
2394 2026
1983 2624
1948 2597
2047 2347
2542 2212
2112 2142
2125 2332
1951 1919
2199 2042
2009 1973
2229 2240
2347 2511
2229 2329
2572 2336
2055 2056
2216 2103
1926 2072
2480 2637
2144 2032
2601 2591
2508 2608
2485 2381
2418 2323
2149 2185
2161 2007
2384 1465
2229 2190
2420 2138
1920 2128
2359 2257
1964 2226
2105 2342
1943 2040
2027 2116
2064 2237
1985 2611
2446 2593
2373 1934
2643 1941
2488 2082
2495 2172
2615 2546
2336 2582
1947 2394
2650 2515
2551 2604
2064 2046
2643 2279
2460 2552
2410 2485
2473 2589
1925 2504
2384 2289
2564 2489
2128 2304
2134 2616
2504 2290
2149 2068
2135 2463
2475 2196
2405 2236
1921 2025
2418 2122
1985 2218
2601 1984
2028 2273
2559 2253
2128 1916
2020 2309
1963 2340
2278 2578
2223 2047
2122 2045
2626 1958
2542 2560
2157 2648
2370 2549
2635 2443
2299 2363
2321 2017
1945 2465
2560 2512
2156 2130
2250 2111
2586 2077
1955 2629
2611 2086
2414 2142
2071 1955
2600 2354
2125 2419
2078 2363
2576 1979
2511 2420
2355 2641
2340 2615
2038 2473
2191 2241
2489 2539
2630 2561
2343 2246
2135 2133
2233 2395
2396 1970
2137 2135
2074 2460
2410 2619
2261 2059
2138 2420
2142 2501
1997 2229
2484 2359
2498 2296
2172 2030
2198 2384
2161 2101
2176 2333
2040 2423
2394 2283
2635 2598
2108 2040
2319 2592
2045 2142
2509 1916
1940 2133
2049 2173
2292 2247
2115 2059
2409 2478
2409 2090
1943 2556
2218 2607
2290 2374
2407 2063
2200 2271
2433 2115
2381 2271
2536 1971
2112 2020
1954 2143
1994 2138
2220 2184
2161 1955
2266 2212
2294 2054
2597 2436
2478 2150
2534 2497
2254 2176
2542 2104
2108 2611
2306 2109
1718 2148
1959 2223
2081 1939
136 2284
2398 2125
2293 2543
2287 2142
2578 2430
2108 2339
2459 2529
2512 2434
2552 2369
2093 2356
2069 2115
2495 1985
1948 2032
2151 2133
2218 2601
2577 2587
2078 2090
2625 2359
2477 2526
2118 2414
2261 2381
2410 2468
1914 2001
2543 1926
2478 2308
2631 2600
2323 2352
2518 2185
1918 2492
2122 2184
2509 2254
2081 2394
2646 2123
2276 2095
1920 2194
2463 2516
2069 2188
2141 2133
2638 2069
2516 2191
2327 1577
2280 2491
2188 2391
2062 2390
2323 2090
2005 2395
2594 2508
1981 2396
2631 2218
2078 1983
2264 2215
2590 1943
2246 2368
2559 2103
2150 2056
2104 2460
2549 2190
1918 1985
2283 2209
2573 2462
2428 2552
2289 2336
2153 2461
1958 1951
2117 2394
2224 2198
2290 2073
2024 1972
2351 2567
2112 2433
2131 1983
2590 2140
2201 2446
2511 2199
2020 2462
2563 1946
2240 2485
2299 2033
2506 2043
2122 2340
2574 2359
2007 2134
2209 2289
2625 1925
2616 2509
2556 2559
2040 1938
2348 2564
2447 2022
2276 2469
2446 1993
2073 1962
2123 2210
2472 2018
2122 2551
2289 2629
2275 2359
2307 2408
2125 1959
1917 2356
2200 2410
2409 2604
1997 2074
2628 2049
2521 2063
2331 2300
2185 2434
2339 2121
2159 1973
1920 2149
2478 2257
2248 1975
1946 2430
2543 2496
2458 2649
2257 1983
2096 2054
2229 2543
2464 2549
1987 1959
2555 2508
2186 2085
2602 2086
2602 2604
2241 2183
2069 2574
2165 2520
2510 1941
2022 1976
2578 2237
2549 2482
2392 2468
1913 2203
2420 2328
1985 2339
2129 2570
2333 2472
2510 2608
2327 2254
2218 2290
2302 2491
2109 2059
2501 2390
2521 2172
2381 2142
2620 2633
1989 1984
2477 2352
2440 2361
1926 2567
2523 2474
2154 2376
2660 1951
2043 2334
2589 2068
2550 2590
2026 2153
2551 2539
2276 1971
2316 2577
2586 2492
2038 2509
2273 2187
2054 2039
2135 2319
2124 2154
2188 2184
1917 2005
2348 2551
1941 2169
2233 2074
2045 2323
2357 2562
2556 2098
2081 2289
2284 2647
2536 2088
2090 1971
2102 1941
1923 2242
2333 2280
2639 2011
2218 2324
2370 2363
2482 1946
2306 2414
2000 1976
2462 1938
1941 2271
2053 2390
2547 2174
2593 2334
2267 2133
2642 2653
2144 2643
2604 1983
2157 2447
2069 2560
2648 2143
2646 2551
2151 2138
1986 2056
2052 2068
2359 2056
2399 2463
2520 2078
2081 2537
2506 2404
2347 1953
1993 2329
2206 2563
2294 2010
1577 2289
2510 1948
2201 1925
2095 2546
2354 2593
1918 2290
2404 2206
1985 2543
2353 2521
2488 2342
1963 2060
2220 2329
2229 2200
2326 2218
2459 1991
2642 2472
2188 2551
2428 2266
2159 2627
2655 2074
2467 2324
2351 1959
2257 2551
2575 2121
2001 2061
2430 2601
2370 2560
1923 2362
2061 2097
2331 2278
2578 2139
2659 1980
2468 2172
2276 2549
2330 2616
2045 2271
1918 2542
2237 2556
2553 2253
2309 2500
2617 2461
2404 1986
2238 2162
2033 2083
2539 2311
2343 2155
2298 2480
2554 2244
2088 2299
2599 2653
2131 1966
2498 2071
2290 2423
2340 2073
1946 2142
1966 2045
2657 2620
2384 2436
2613 2184
2071 2133
2340 1953
2408 1985
2476 2189
2053 2075
2484 2261
2224 2451
2329 2543
2007 2052
2122 2030
1943 2276
2328 1981
2184 2359
2138 2465
2098 2030
2169 1718
2333 2003
2428 2074
2436 1577
2447 2297
2271 1938
2589 2007
2574 2369
2410 2237
2449 2430
2409 2188
2630 2564
2101 2603
2398 2223
2328 2163
2549 2033
2568 2054
2043 2482
2236 1964
2084 2460
1917 2560
1577 2250
2133 2302
2244 2309
2285 2215
2220 2460
2551 2381
2392 1929
2159 1995
2532 2090
2623 2492
2329 2233
2507 2554
2042 2047
2408 2037
2154 2391
2183 2137
2037 2108
2324 2460
2247 1465
1951 2001
1943 2477
2369 2005
2254 2149
2438 2415
2478 2354
1962 1993
2417 2508
2329 2123
2462 2586
2201 2200
2010 2054
2290 2404
1926 2145
2040 2546
2347 2484
2461 1940
2353 2188
1992 2650
2598 2330
2561 2334
2575 2140
2133 2525
2635 1945
1946 1966
2139 2600
1945 1947
1966 2123
2068 2151
2144 2138
2116 2128
2500 2206
2294 2072
2088 2063
2552 2604
2300 2631
2492 2074
1983 2131
2075 2128
2054 2274
2115 2233
2561 1985
2333 2075
2007 2266
2110 2438
2492 2046
1955 2555
2052 2338
2654 2593
2199 2475
2593 2433
1983 2244
2101 2511
1718 1955
2338 1959
2655 2218
2533 2471
2553 2150
2285 2194
2033 2625
2131 2172
2020 2299
2590 2549
2124 1917
2210 2333
2652 2003
2495 2090
2334 2142
2625 1941
2414 2356
2434 2026
2257 2078
2148 2516
2307 2410
2507 2504
2400 2384
2356 2103
2467 2118
2409 2646
2038 2612
2104 2578
2560 2530
2574 2554
2329 2462
2449 2611
2381 2482
2033 2109
2047 2314
2134 2347
2522 1982
2356 2376
2020 2556
2330 2510
2428 2560
2589 1955
2477 2201
1966 2331
2174 2285
2629 1718
2471 2417
2203 2264
2127 2616
2007 2429
2468 2543
2188 2539
2093 2200
2521 2556
2176 1964
2592 2653
2468 2329
2218 1925
2142 2244
2111 2241
2131 2539
2561 2468
2451 2032
2229 2278
2354 2206
2107 2628
2660 2225
2038 2186
2324 2326
2055 2477
2347 2064
2347 2492
2468 2047
2042 2522
2142 2308
2369 1929
2347 2210
2510 2465
2655 1983
2240 2574
2172 2276
2218 2430
2642 2267
2339 2299
2494 2004
2208 2592
2225 2639
2618 1960
2150 2055
2531 1972
2419 2629
2237 2495
2169 1947
2069 2184
2172 2112
2498 2294
2326 2430
2364 2585
2220 2045
2063 2464
2124 2040
2273 2198
1718 1945
2408 1953
1916 2384
2559 2654
2103 2140
2229 1979
2235 2438
2229 2446
2460 2253
2374 2409
2525 2289
2283 2247
2300 2118
1947 2153
2575 2556
1918 2326
2507 2359
2086 2593
2601 2184
2521 1943
2299 2037
2324 2084
2054 2338
2643 2384
2512 2344
2490 2650
2445 2144
2292 2267
2200 2244
2543 2555
2538 2346
1964 2448
2381 2164
2108 2460
2309 2460
2474 2580
2348 1938
2124 2078
1953 2624
2135 2384
2257 2123
2140 2037
2511 2304
2098 2638
2399 2282
2213 2140
2352 2526
1951 1935
2611 2381
1935 2225
2586 2216
2261 1979
2279 1959
2643 2438
2564 2220
2216 2188
2611 2593
2451 2072
2279 2196
2253 2549
2331 2063
2292 2461
1970 2327
2339 2172
2653 2463
2309 2590
1918 2020
2436 2502
2116 2027
2489 2124
2344 2102
2329 2088
2484 1971
2414 2469
2074 1963
2054 2189
2261 2190
2511 2039
2386 2040
2010 2241
2007 2510
2199 2582
2172 2395
2460 2495
1990 1978
2051 2632
2206 2257
2468 2414
2512 2516
1577 2087
2042 2445
2216 2409
2084 2044
2649 2537
2210 2607
1929 2030
2326 2551
2006 2660
2468 2340
1985 2308
2115 2464
1987 2417
2324 2184
2469 2638
2040 2506
2139 2140
2109 2201
2042 1932
2054 2336
2491 2247
2190 2353
2293 2336
2574 2326
2655 1946
2438 2333
2556 2088
2409 2308
1935 2660
2454 1983
2087 2594
2601 1966
2572 2468
2433 2549
2233 2532
2134 1932
2553 2045
2363 2103
2143 1973
2192 1919
1929 2033
2261 2586
2097 2022
2042 2102
2121 2489
2370 2142
1991 2024
2324 2623
2549 2275
2032 2508
1920 2502
2576 1984
2520 2140
2244 2216
2053 2533
2142 2550
2374 2532
1988 2259
2319 2087
2326 2233
2428 2492
2068 2616
2309 2655
2001 2159
2618 2251
2045 2306
2507 2323
2363 1971
2236 2361
1993 2218
2210 2218
2353 2233
2625 2604
2508 2347
2055 2615
2289 2471
2315 2465
1926 2111
2343 2233
2059 2532
2438 2081
2149 2054
2068 2279
2602 2556
2409 2552
1931 1935
2010 2047
2228 2035
2202 1973
2213 2590
2394 2039
2090 2237
1917 2433
2536 2491
1984 2299
2592 2183
2038 2134
2176 2328
2371 2047
2108 2154
2339 2532
2475 2224
2344 2390
1577 2053
2537 2543
2090 2593
2020 2233
2200 2093
1993 1983
2093 1946
2414 2275
2381 2093
2046 2150
2561 2601
2052 1718
2032 2072
2604 2077
1920 2294
2181 2129
2324 2311
2103 2655
2332 2293
1979 2142
2278 1943
2093 2484
2399 2149
2209 2498
2151 2344
2579 2507
2191 2183
2352 2469
2033 2604
2432 2396
2520 2550
2465 2264
2469 2323
2620 2022
2097 2000
2352 2121
1920 2279
2233 2507
2043 2655
2601 2376
2586 2276
2374 2369
2020 2084
2246 2180
1959 2268
2536 1925
2064 2275
2294 2598
1938 2489
2392 2190
2307 2074
2511 2463
2376 2561
2386 2112
1983 2200
2007 1718
2520 2077
1918 2469
2253 2090
2564 2428
2254 2508
2436 2588
2631 2200
2138 1964
2228 2260
2511 2075
2010 2555
2133 2189
2438 1947
2464 2586
2578 2131
2500 2103
1917 2539
2624 2532
2451 2268
2220 2407
2649 2259
2635 2032
2179 2638
2419 2343
1955 2071
2046 2188
2233 2116
1983 2526
2091 2129
2065 1941
2560 2347
1970 2511
1980 2648
2240 2329
2002 2203
2200 1917
1959 2250
2316 2231
2475 2125
2593 2261
2329 1984
2642 2366
2131 2063
2539 2201
2323 2446
2020 2190
1946 2359
2623 2542
2200 2573
2073 1993
2266 2462
2005 2045
2046 2500
2643 2471
2559 2638
2153 2599
2095 1997
2548 2113
2445 2042
1972 2378
2130 2197
2076 2515
2259 2327
2608 2511
1964 2416
2201 2423
2088 2625
2183 2451
2202 1931
2459 1921
2644 2424
2223 2250
2108 2340
1994 2533
2334 1938
2088 2172
1941 2142
2428 2139
2081 2589
2170 2444
2104 2005
2373 2411
2628 2644
1964 2505
2436 2302
2124 2604
2282 2479
2210 2040
2537 2111
2356 2271
2387 2037
2631 2044
2539 2086
2266 2553
2658 2447
2500 2045
2482 2340
2053 2052
2087 2555
2065 2208
2258 2549
2072 2511
2161 2110
2309 2423
2327 2629
2164 2369
2267 2002
2150 2139
2132 2592
2261 1953
2604 2220
2356 2646
2407 2615
2459 2013
2143 1985
2150 2276
2425 2185
1945 2434
2554 2190
2494 2018
2433 1986
2059 2188
2043 2359
2045 2077
2148 2180
2564 2299
2598 2235
2430 2112
2268 2254
2433 2095
2631 2123
2649 2511
2088 2064
1979 2495
2616 2116
1949 2277
1963 2573
2253 2507
2409 2257
1941 2093
2139 2216
2303 2387
1973 2647
2176 2180
2272 2060
2038 1987
2210 1966
2539 1993
2313 2282
2031 2289
2423 2308
2318 2416
2491 2451
2351 2533
2083 2123
2486 1992
2520 2356
2485 2611
2311 2287
2132 2462
2218 2030
2013 1921
2129 2614
2276 2021
1987 2254
2553 2495
2062 2384
1995 2639
2090 2122
2062 2183
2649 2133
2610 2296
2103 2059
2520 1983
2087 1940
1952 2222
2073 2602
2485 2326
2180 2384
2601 2139
1994 2543
2546 2495
2139 2078
2624 2428
2117 2007
1935 2365
2047 2193
2359 2229
2183 2081
2319 2149
2544 2128
2412 2341
2480 2298
2590 2339
2218 2172
2030 2354
2546 2200
2282 2138
2600 2631
2187 2643
1954 1919
2074 2619
2028 2134
2410 2118
1945 2071
1989 2037
2339 1946
2629 2461
1962 2339
2142 2625
2356 2084
2072 1920
2478 1943
2368 2250
2274 2434
2110 2511
2356 1953
2384 2327
2032 2028
2311 2103
2069 2090
2344 2616
2229 2331
136 2054
2327 2047
2499 2500
2592 2054
2326 2593
2224 1940
2224 2169
2325 2425
2511 2223
1945 2250
2534 1975
2157 2459
2351 1920
2215 2384
1926 2406
2075 2344
2324 2607
1918 2615
2508 2379
2184 2257
2436 1955
2088 2136
2307 2376
2191 2032
2268 2571
2206 2418
2559 2324
1989 2229
2563 2507
2081 2052
2223 2555
2509 2372
2612 2226
2598 1959
2062 2279
2551 2506
2532 2556
2271 2056
2179 2613
2131 2654
2386 2083
2331 2611
2368 2292
1917 2492
2624 2118
2655 2492
2123 2030
2266 1984
2537 2652
2154 2131
2539 2428
2484 2655
2500 2356
2551 2112
2131 2115
2576 2410
1943 2602
2507 2290
2461 1941
2607 2308
2074 2468
2341 2173
2292 2419
1985 1979
2365 2159
2038 2598
2001 1972
2200 2324
2476 1942
2539 2619
2311 2131
2608 2101
2463 2054
2068 2366
2610 1964
2586 2485
2428 2352
2309 2340
1998 2116
2053 2328
1989 2220
2331 2507
1986 2600
2495 2520
2429 2150
2064 2423
2088 2507
2659 2534
2009 2583
2090 2276
2410 1946
2430 1941
2624 2020
2223 2511
2060 2093
2086 2407
2192 2657
2325 2289
2007 2169
2520 2600
1943 2559
1945 2328
2533 2511
2311 2646
1938 2136
2183 2132
2292 2203
2115 2299
2289 2185
2471 1948
2537 2617
2446 2433
2046 2579
2597 2510
2030 2021
2385 2283
2104 2030
2275 2123
2464 2115
1948 2007
2551 2553
2140 2552
2261 2276
1957 2365
2293 2332
1954 2169
1995 1973
2398 2062
2396 2199
2139 2638
1997 2619
2381 2564
2624 2005
2133 2141
2526 2118
2304 2169
2247 2241
2138 2259
2601 2073
2092 2393
2187 2268
2447 2171
2218 2507
2290 2348
2102 2068
1934 2388
2149 2372
2169 2589
2347 2239
2291 1977
2554 2212
1973 2319
2501 2040
2395 2088
2623 2275
2151 2039
2298 1916
2302 2241
2370 2575
2046 2619
2142 2631
2319 1955
2405 2181
2451 2169
2597 1932
2564 2404
2267 2071
2613 2164
2287 2324
2336 2232
2550 1979
2212 2188
2329 2218
2352 2271
2449 2602
2650 2255
2169 2047
2030 2556
2334 2369
2655 2408
2187 2419
1962 2136
1985 2559
2575 2326
2351 2062
2334 2233
2188 2275
2648 1951
2097 1957
2410 1985
2124 2615
2025 1980
2419 1926
2191 2081
2447 2639
2404 2654
2539 2108
2053 2072
2655 2611
2617 2333
2408 1943
2468 2218
2257 1938
1927 2660
2018 2417
2630 2593
2265 2256
2370 2055
2176 1965
2615 2278
2469 2381
2286 2503
2294 2176
2555 2072
2471 2319
2267 2617
2604 2040
2309 2573
2068 2161
2136 2233
2319 2194
2532 2352
1972 1998
2037 2477
2009 2647
2597 2137
2241 2111
2083 2240
2324 2604
2436 2471
2196 2347
2033 2386
2276 2103
2520 2184
2563 2559
1973 1980
2556 2578
2611 2418
2491 2280
2000 2202
1983 2625
2309 2468
2356 2560
2368 2087
2464 2200
2573 2430
1980 2018
2052 2461
2655 2602
2543 2098
2467 2604
2078 2546
2043 2484
1465 2372
2563 2088
2471 2304
1993 2495
2604 2078
2555 2099
2257 2564
2027 2365
2237 2308
2398 2087
2359 2278
2028 2224
2149 2223
2213 2630
1939 2111
2241 2002
1984 2356
1983 2339
2507 2646
1976 2384
2600 2353
2551 2560
2630 2078
2460 2430
2068 2196
2477 2409
2542 2055
2117 2134
2045 2546
2231 2023
2638 2646
2090 2323
2274 1970
2240 2308
2299 2084
2578 1979
2108 1918
2121 2553
2352 2468
2326 2309
2376 2395
2359 2520
2121 2308
2645 2006
2229 2395
2210 1983
2187 2264
2190 2237
2213 1986
2266 1465
2414 2410
2125 2512
2292 2087
2095 2271
2401 1924
2118 1986
2271 2601
2148 2071
2117 2465
2385 2180
2133 2328
2347 2404
2600 2638
1983 2220
2642 2132
2206 2564
1929 2078
2439 2528
2111 2461
2190 2188
2292 2643
2404 2655
2108 2543
2283 2163
2290 2339
2179 2271
2132 1577
2062 2072
2400 2319
1984 2206
2647 2050
2485 2601
1984 2150
1919 2192
2333 1465
2440 2286
2212 2369
2302 1940
1946 2172
2038 2327
2504 2611
2174 1940
2212 2607
2244 2460
428 563
2433 2374
2024 2494
2142 2290
2146 2455
2052 2283
2617 2598
2190 1917
2131 2478
2619 2631
2093 2593
2292 2180
2560 2464
2347 2643
2295 2643
2059 2172
2308 2059
2495 1918
2464 2625
2588 2436
2501 1981
2602 2142
2118 2271
2059 2060
2381 2306
2142 2407
1941 2240
2479 2501
2348 2521
2446 2307
2356 2074
2586 2482
2053 2285
2538 1919
2600 2604
2492 2212
2615 2086
2041 2634
2458 2125
2104 2123
2578 2395
2369 2578
2093 2218
2016 1931
2471 2377
2492 2020
1932 2282
2303 1983
2246 2643
2654 2188
2468 2559
2272 1923
2546 2575
2464 2469
2134 2007
2533 2241
2386 2326
2212 2507
2326 2040
2266 2586
1953 2172
2022 2620
2033 2287
2005 2112
1940 2498
2559 2090
2420 1955
1954 2475
2196 2332
2109 2363
2472 2336
2564 2056
2216 2045
1989 2040
2307 2240
2103 2240
1932 1926
2370 2077
2111 2215
1986 2423
2271 2266
2304 2199
2362 2211
2109 2271
2028 2588
1962 2218
2408 2112
2033 1971
2366 2126
2560 2586
2319 2250
2510 2445
2299 2370
2111 2110
2045 2578
1947 2062
2135 2642
2077 2395
136 2180
2183 2264
2407 2131
2090 2030
2161 2003
2196 1941
2229 2150
2259 2379
2331 2340
2187 2149
2598 2367
2276 2551
2030 2604
2331 2179
2275 2391
2196 2144
2087 2111
2482 2307
2525 2637
2200 1953
2374 2059
2042 1948
2445 2471
2010 1948
2250 2302
2290 2506
2039 2191
2111 2010
2088 2326
2278 2356
2211 2296
2436 2250
2220 2240
2131 2108
2629 1955
2109 2507
2407 2369
2266 1929
2064 2615
2002 2267
2237 1983
2600 2521
2597 2293
2134 2319
2353 2352
2588 2187
2395 2604
2176 2318
2062 2543
2593 2624
2266 2526
2511 2127
2348 2060
2103 2591
2539 2030
2338 2054
2239 2203
2127 2336
2409 2564
2264 2071
2304 2052
1938 2414
2512 2038
2115 2485
2539 2063
2196 2417
1971 2611
1943 2108
1989 2464
2386 2423
2340 2624
2445 2653
2381 2429
2268 2259
2333 2501
2658 2097
2294 2138
2078 1953
2436 1959
1942 2007
2564 2233
2654 2625
2443 2542
2485 2374
2183 2072
2086 2056
2597 2567
2306 2602
1983 2428
2579 1985
2259 2401
2200 2601
2462 2266
2004 2364
2172 2348
1943 2188
2600 2210
2428 2347
2464 1963
1948 2609
2418 2625
2038 2259
2278 2308
2187 2617
2429 2607
2056 2410
2153 1465
2449 2476
2029 1944
2484 2164
2397 2577
2601 2460
2598 2254
2564 2526
2320 2486
2356 2093
2038 1944
2051 2614
2547 1577
2395 2392
2507 2307
2136 2108
1939 2053
2266 2556
2224 2598
2111 1952
2225 2014
2381 1943
2531 1970
2414 2460
2116 2413
2345 2219
2643 2203
2025 2626
2427 2478
2234 2584
2433 2363
2264 2498
2648 1921
2561 2354
2551 2552
2165 2212
2550 2520
2018 1928
1917 1953
2460 2124
2001 1957
2091 2341
2546 2551
2342 2402
2203 2529
1577 1994
2333 2125
2371 1964
2510 2377
2134 2028
2526 2324
2210 2172
2340 2563
2563 2229
1971 2593
2385 2336
1999 1976
2345 1945
2359 2500
2560 2086
2477 2140
2530 2117
1971 1943
2164 1966
2275 2257
2071 2516
2460 2329
2482 2611
2511 2603
2500 2299
2084 2060
1993 1917
2188 2172
2115 1984
2243 2598
2125 1926
2500 2477
2001 2337
2508 2327
2275 2253
2499 2139
2354 2179
2102 2039
2286 2047
2607 2611
1962 2154
1924 2207
2469 2376
2537 2461
2549 2150
2112 2184
2504 2103
2240 2356
2078 2409
2203 2649
2359 2339
2161 1981
2658 1935
2627 2171
2468 2153
2436 2268
2532 1938
2037 2387
2031 1923
2332 2438
2045 1917
1986 2074
2099 2555
1971 2131
2055 1918
2571 2268
2377 2117
2516 2010
2560 2563
2458 2081
1718 2031
2630 2276
2575 2386
2370 1946
2617 2183
2196 1959
2423 1966
1941 2005
2520 1943
2395 2359
2370 2093
2039 2199
2472 2347
2165 2485
2458 2148
2095 2309
2218 2154
2640 2157
1966 2467
2423 2266
2328 2062
2392 2323
2556 2308
2347 2323
2117 2598
2611 1941
2620 1973
2543 2502
2246 2582
2626 1919
2624 2404
2235 1982
2578 1971
2589 1945
2109 2229
1971 2090
2139 2084
2261 2240
2193 1936
2069 2060
2275 2306
1966 2600
2604 1938
2276 2467
2309 2300
2398 2293
2037 2623
2103 1983
2169 2332
2201 2468
2084 2309
2190 1938
2378 2639
1971 2347
2283 2351
2063 1983
1985 2275
2031 2272
2002 2062
2553 2500
2278 2056
2058 1985
2602 2623
2324 2115
2379 2598
2123 2506
2216 2410
2352 2655
2606 2213
2482 2376
2618 2371
2336 1947
2069 2556
2069 2104
2111 2295
2142 2104
2430 1943
2582 1718
2124 2299
2004 2018
2246 2268
2103 2206
2561 2077
2246 2511
2223 2039
2326 2220
2423 2030
2403 2314
2584 2478
2392 2374
2575 2098
2176 2461
2142 2559
2611 2446
2188 2363
2404 2299
2069 2443
1947 2355
2090 2552
2307 2590
2287 2602
1985 2261
2038 2138
2299 2109
2224 2102
1949 2181
2033 2410
2188 2353
2359 2121
2126 2628
2549 2078
2190 2559
2606 2604
2608 2379
2429 2184
2434 2198
1979 2213
2433 2084
2593 2104
2030 2306
2555 2239
2507 1938
2271 2554
2283 2336
2235 2461
2136 2216
2520 1989
2336 2463
2052 2102
2336 2138
2150 2602
2202 2192
2479 2221
2206 2261
2138 2174
2060 2271
2562 2656
1966 2409
2140 1985
2407 2021
1938 2253
2533 136
1972 1927
1985 2646
2374 2546
2134 2180
2317 2228
2052 2117
2502 2169
2059 2086
2176 2594
2616 2111
2154 2090
2040 2112
2324 2395
1918 2287
2330 2007
1933 2129
2506 2395
2319 1959
2308 2118
2520 2575
2612 2289
1938 2449
1985 2140
2035 1975
2257 2578
1577 2547
2209 2610
2190 2574
2172 2414
2284 2364
2463 2247
2217 2558
2244 2030
2339 2059
1948 2199
2592 1994
2423 2573
2005 2464
2625 2468
2153 2302
2387 2429
2598 2148
2123 2500
2072 2180
2589 2315
2495 2563
2313 2049
2467 2240
2211 2566
2631 2495
2144 2319
2446 2109
2088 2536
2092 2067
1921 2659
2571 2187
2254 2180
2647 2645
2064 2308
2615 1993
2283 2052
2550 2542
2608 2199
2623 2560
2001 2639
2189 1985
2093 2131
2190 2271
2409 2593
1947 2110
2542 2443
2139 2073
2359 2469
2393 2526
2430 2359
2190 2073
1962 2404
2044 2288
2212 2353
1983 2376
2300 2564
2500 2098
2394 2007
2436 2087
2333 2608
2090 2253
2056 2074
2404 2237
2331 2428
2659 2647
2638 2492
2211 2525
2131 2261
2104 2271
2599 2032
2283 2032
2116 1973
2143 2294
1986 2276
2102 2332
2188 2500
2577 2129
2081 2594
2118 1962
1577 2355
2207 2426
2049 2488
2366 2205
2536 2033
2468 2220
2108 2331
2183 2592
2652 2377
2604 2201
2161 2511
1945 2183
2117 1465
2266 2484
2257 2563
2179 2600
2617 2102
1920 2125
2340 2201
2073 2356
2285 2338
2123 2218
2606 2059
2183 2344
1577 2298
1984 2212
1933 2120
2241 2516
2268 2364
1983 1989
2344 2149
2555 2153
2660 1914
1947 2133
2460 1962
2087 2597
2033 2142
2418 2271
2591 1929
2088 1983
2344 1945
2404 1966
1929 2560
1942 2556
2213 2468
2609 1932
2030 2040
2607 2623
2021 2601
2275 2104
2123 2069
2218 2074
2526 2619
2354 2233
2102 1916
2152 2405
2334 2561
2431 2263
2038 2047
2556 2040
1976 2004
2240 2353
2016 2022
2133 2068
2631 2210
1948 1920
2561 2112
2126 2448
2122 2446
2237 2206
2649 2223
2594 1577
2410 2430
2463 2223
2539 2418
2504 2077
2556 2631
2619 2606
2186 2047
2372 2347
2244 2407
2464 2206
2275 2213
2169 2194
2246 2241
2078 2543
2549 2213
2630 2060
2273 2475
2396 2451
1982 2522
2555 2134
1945 2032
2169 1954
2458 2516
2477 2309
2109 2590
2328 2279
2409 1943
2118 2131
2043 2370
2428 2030
2507 1925
2253 2093
1918 2121
2229 2140
2052 2039
2586 1918
2339 2257
2284 1927
2243 2282
2498 2196
1979 2489
2500 1917
2329 2625
2131 2359
2363 2646
2246 2247
2188 1941
2557 2603
2471 2224
2407 2564
2058 2007
1989 2339
2326 2340
2495 2484
2201 2033
2482 1971
2239 2518
2268 2157
2046 2276
2138 2144
1971 1938
2004 2538
2352 2638
1993 2005
1983 2395
2276 2324
1963 2354
2331 1943
2135 2138
2331 2369
2161 2259
1979 2164
1943 2546
2538 1999
2540 2173
2090 2550
1932 136
2247 2332
2642 2031
2242 2452
2325 2176
2225 1914
2236 1960
2069 2460
2148 2372
2103 2278
2275 2045
2043 2140
2272 2031
2461 2598
2134 2384
2056 2212
2144 2609
2420 1959
1939 2125
2588 2133
2030 2309
1993 2370
2118 2093
2429 2275
2247 2398
2111 2616
2307 2602
1971 2561
2134 2292
2001 1995
2376 2477
2521 1984
1577 2544
2398 2183
2076 2622
2343 2498
2359 2037
2299 1997
2307 2374
2434 2336
2081 2274
2007 2234
2074 1946
2643 2250
2142 2518
2526 2121
2124 2549
2309 2462
2282 2191
2560 1979
2246 2598
2601 2093
2655 2309
2039 2224
2084 2495
2546 2275
2216 2043
2468 2283
2542 2300
2136 1943
2629 2028
2509 2289
2201 2554
2615 2586
2086 1986
2430 2410
2042 2128
2272 2141
2462 1966
2564 2266
1923 2480
2451 1947
2201 2190
2333 1718
2600 2073
2603 2003
2312 2531
2631 2084
2294 2102
2104 1918
2363 2188
2150 2275
2511 2161
2278 1983
2553 2386
2254 2042
2332 2567
2384 2551
1932 2461
2486 2650
2605 2649
2542 2206
1947 1577
2244 2554
2218 1953
2628 2228
2555 2592
2492 2220
2549 2206
2660 1991
2510 2516
2201 2073
2282 2293
2073 2546
2247 1948
2190 2112
2563 2604
2306 2561
2241 2283
2090 2551
2399 2053
2623 2184
2257 2462
2142 2275
2533 2468
2127 1577
2172 2347
2323 2638
2476 2482
2546 2500
2113 2558
2326 2539
2460 2631
1959 2333
2619 2253
2229 2542
1929 2593
2137 2333
2506 2464
2053 2543
2374 2188
2376 1993
2608 2138
2428 2500
2469 2201
2602 2549
2224 2189
1917 1997
2346 1973
2108 1993
2026 2239
2526 2220
2035 2228
2155 2425
2212 2124
2247 2052
2616 2095
2625 1918
2287 2553
2201 2218
2187 2333
2574 2539
2489 1985
2469 2172
2506 2218
2050 2297
2381 2549
2049 2628
2408 2418
2021 2407
2563 2386
1948 2332
2333 2176
1925 2578
2078 2489
2199 2367
2221 2235
2045 2206
2308 2290
2111 2377
2559 2339
2077 1946
2089 2107
2046 2624
2302 2052
2376 2586
2532 1997
2649 2519
2315 2302
2423 2578
2556 2064
2537 2232
2018 2365
2567 2372
2348 2381
2559 1979
2107 2656
1943 1918
2331 2613
2078 2507
1998 2640
2423 2460
2370 2630
2073 2579
2510 2642
2339 2460
2574 2392
2482 2409
2184 2619
2359 2266
2210 2201
2655 2352
2484 2615
2201 2611
2039 2187
2367 2617
1926 2327
1943 2353
2435 2004
2536 2343
2294 2396
2449 2067
1981 2274
2561 2429
2429 2206
2329 2601
2327 2026
2648 2225
2323 2200
2458 2332
2307 2103
2078 2164
2047 2286
2603 2479
2123 2093
2124 2287
2122 2430
2244 2489
2549 2088
2559 2334
2374 2602
2299 2418
136 2116
2387 2443
2646 2593
2332 2198
2280 2518
2063 2122
2007 2600
2043 2095
2327 2125
2095 2539
2052 2377
1918 2625
2507 2077
2247 2285
1938 2323
2472 2225
2381 2104
1577 2463
2102 2149
2063 2646
2536 1938
2122 2308
1927 1931
2257 2576
2220 2462
2458 2445
2618 2228
2546 2370
2080 2193
2440 2035
2520 2428
2526 2606
2585 2640
2392 2150
1970 2608
2555 2053
2328 2174
2253 2069
2118 2329
2549 2077
1917 2374
2369 1971
2190 2553
1577 2247
2328 2233
2616 2133
2384 2010
2229 2423
2250 2389
2309 2347
2246 2132
2329 2542
2083 1985
2117 2372
2315 2199
2352 2124
2080 2614
1962 2090
2248 1936
1929 2551
2294 2125
1957 1951
2622 2604
2445 2336
1984 2172
2439 2313
2086 2430
2307 2507
2660 2061
2621 2528
2468 2164
2279 2032
2458 2438
2409 2043
2482 2339
2601 2077
1941 2355
2083 2409
2115 2574
2624 2478
2068 2223
2112 1918
2300 2323
2054 2247
2539 1983
2588 2111
1974 2651
2099 2283
1986 2220
2218 2088
1985 2043
2549 2542
2494 1919
2324 2308
1992 2170
1997 2275
2072 2161
2090 2539
2134 2555
2543 1983
2123 1943
2624 2299
2409 2559
2059 2348
2077 2549
2088 2086
2037 2045
2611 2469
2468 2420
2007 2239
2648 2014
2512 1947
2046 2553
2445 2224
2356 2324
2469 2575
2229 2363
2139 2124
1917 1962
2270 2525
2586 1985
2307 2073
2604 2275
2108 2492
1963 2240
2271 2324
2249 2279
2451 2068
1577 2176
2625 2564
1945 1577
2583 1999
2309 2299
2399 2466
2131 2520
2138 2598
2451 2144
2554 2507
2482 2040
2033 2078
2224 2582
2607 2086
2609 2285
2428 1983
2090 2499
1962 2210
2118 2136
2464 2266
2329 2607
1940 2330
2209 2272
2218 2631
2398 2347
2468 2390
2046 2090
2425 2594
2290 2257
2508 2336
2233 2266
2445 2174
2001 1935
2188 2331
2199 2254
2597 2111
2253 2409
1941 2042
2399 1920
2348 1918
2011 2364
2150 2504
2153 2617
2233 2423
2213 2554
2339 2233
2200 2213
2465 2134
1953 2492
2167 2281
1946 2046
1577 1916
2063 2611
2144 2292
2352 2218
2244 2559
2244 2395
2133 2054
2408 2253
1577 2117
2353 2083
2608 2629
2374 2172
2339 2374
2364 2061
1943 2478
1929 2619
2353 2307
2611 2118
2142 1943
2500 2323
2615 2261
2608 2183
2216 2200
1956 2634
2032 2461
2088 1971
2642 2555
2419 2169
2103 2573
2550 2188
2579 2506
2420 2319
136 2038
2464 2352
2107 1922
2542 2654
2329 2331
2210 2381
2149 2519
2184 1986
2438 2110
2334 2045
2308 2108
2030 1971
2578 2607
2081 2177
2042 2199
2384 2246
1946 2108
2551 2549
2056 2339
1985 1989
2282 2419
2212 2593
2188 2123
2359 2460
2189 2387
2033 2326
2624 2218
2131 2356
2272 2133
2078 2376
2200 2220
2140 2103
1993 2233
2012 1976
2370 2233
2378 2171
2523 2236
2150 2356
2283 2319
2091 2156
2404 2164
2348 1925
2104 2172
1940 2026
2464 2046
2480 2209
2616 1920
2333 2372
2188 2549
2309 2115
2180 2417
2450 2100
2324 2446
2345 1982
2605 2028
2560 2549
2482 1918
2511 2384
2615 2064
2461 2594
2207 2259
2081 1920
2108 2139
2266 2348
2241 2347
2643 2174
1919 2022
2022 1980
2537 2183
2525 2209
1954 2133
2543 2187
2183 2510
2396 2274
2059 2108
2206 2611
2133 1944
2120 2107
2339 1938
2308 2020
2550 2460
2418 2190
2032 2259
2498 1916
2271 1917
1971 2109
2461 2543
2507 2059
1929 2095
2093 1983
2604 2551
2138 2302
2209 2325
2607 2574
2553 2142
1926 2338
2410 2124
2039 2189
2546 2213
2464 2573
2187 2465
2115 2600
2001 1914
1932 2127
2104 2428
2132 2243
2354 2276
2507 2638
2212 2418
2132 2491
2590 2464
2660 2494
2004 1991
2600 2213
2287 2124
2056 2233
2278 2073
2367 2635
2274 2603
2149 2250
2591 2532
2325 2107
2316 2360
2543 2533
2617 2304
2298 2605
2638 2073
2504 2124
2150 2258
1975 2503
2258 2409
2045 2504
2136 1986
2312 2250
2058 2607
2244 1989
2368 1947
2656 2373
1999 2027
2328 2153
1962 2078
2068 2128
2020 2058
2377 2518
2289 1944
2199 2282
2309 2532
2247 2510
2261 2140
2560 2307
2426 2513
2267 2461
2560 2093
2346 2640
2607 1938
2151 2399
2206 2489
2053 2047
1954 2498
2190 2308
2617 2053
2211 2031
2543 2567
2508 2215
2312 2319
2501 2096
2552 2084
2010 2333
2329 2206
2271 2578
2342 2313
2414 2109
2551 2118
2095 2323
2261 2542
2384 2302
2020 2499
2600 2370
2328 2377
2414 2308
2176 2522
1963 2331
2078 2369
2206 2142
2191 2609
2139 2495
2122 1983
1941 2384
2102 2148
2350 2262
1959 2215
2352 2369
2636 2001
2003 2603
2115 2060
2039 2368
2054 2191
2232 2031
2235 2101
2043 2593
2408 1941
2216 1985
2377 2471
2435 2364
2171 2061
2616 2047
2240 2188
2199 2396
2136 2326
1980 2378
2408 2063
2060 2460
2353 2542
2618 2342
2027 2435
2348 2376
2344 2151
2197 2540
2520 2324
2246 1920
2620 2657
2549 2504
2372 2471
1962 2654
2116 2616
2469 1962
2240 1971
1995 2657
1993 2381
2331 1986
2507 2354
2022 2192
2504 2043
2602 1966
2220 2020
2158 2335
2576 2229
2184 2142
2285 2282
2087 2028
2550 1962
1995 2225
2047 2533
2526 2216
2425 2362
2583 1995
1984 2121
2110 1947
2180 2028
2278 2300
1932 2398
2054 1947
2546 2460
2619 2184
2553 1929
2433 2123
1946 2551
2189 2653
2124 1985
2235 1920
2646 2276
2056 2140
2467 2229
2254 2419
1946 1983
2282 2377
2638 2083
2347 2582
2354 2655
2582 2398
2042 1994
2611 2433
2069 2354
2550 2064
1718 2068
2539 2331
2561 2560
2170 2513
2433 2600
2039 2071
2340 2220
2482 2564
2574 2546
2594 2304
2268 2153
2068 2191
2484 2613
2133 2480
2335 2523
2476 2234
2103 2064
2620 2159
2463 2144
2059 1929
2404 2350
2002 2319
2295 2111
2495 2625
2213 2549
2520 2507
2071 2282
2047 2649
1986 2244
2111 2516
2427 2189
2404 2213
2155 2343
1577 1920
2210 2290
2083 2218
2647 1951
1955 1926
2103 2340
2095 2210
2499 2331
2593 2229
2468 2398
2417 2259
2050 1995
2265 2291
2128 2322
2194 2224
2543 2414
2542 2083
2625 2395
2489 2446
2235 2327
2352 1943
1942 2552
2600 2084
2332 2247
2233 1971
1979 2290
2037 2370
2601 2271
2485 2492
1925 1971
2071 2285
2069 2229
2399 2475
2464 2532
2064 2142
2497 2181
2467 2073
2032 2473
2395 2108
2333 1926
2043 2229
1465 2191
2590 2233
2484 2190
2077 1953
2498 2241
2348 2507
2496 2196
2369 2504
1929 2370
2151 2102
2119 2129
2538 2435
2469 1966
2123 2045
2244 2482
2252 2509
2615 1997
2065 2292
1916 1954
2455 2197
2315 2451
2244 2290
2246 2196
2116 1931
2009 2378
2424 2644
2059 2560
2313 2644
2257 1993
2559 2578
2484 2363
2404 2095
2533 2368
2544 1577
2498 2384
1997 2624
2237 2154
2069 1966
2590 2124
2445 2458
2308 2109
2625 2423
2607 2543
2554 2266
2362 2325
2556 2237
2559 2611
2309 1963
1957 2018
2654 2088
2459 1995
2102 2508
2374 2482
1963 2590
2275 2103
2323 2500
2324 2208
2593 2056
2396 2333
2287 2352
2366 2367
2430 2324
2213 2090
1917 2190
2253 2307
2363 1962
1938 2064
2471 2368
1971 2600
2139 2244
2149 2010
2108 2352
2366 2186
2372 2508
2395 2655
2506 2309
2642 2116
1926 2199
2369 2074
2428 2077
1953 2331
2654 2550
2640 1998
2308 2275
2655 2559
2491 2351
2469 2352
2022 2585
2512 2246
2052 2344
1963 2172
2099 2197
2347 2032
2176 2010
2028 2315
1942 2266
2142 2374
2032 1945
2414 2131
2370 2257
2547 2071
1994 2102
2077 2233
2551 2347
2317 2488
2442 2037
2276 1989
2244 2499
2038 2594
2174 2209
2433 2005
2172 2086
1960 2162
2216 2381
2007 2058
1923 2406
2253 2543
2010 2102
2654 2526
2529 2283
2602 2433
2140 2374
2308 2340
2150 2040
2353 2499
2202 1968
2174 2183
2276 2586
2190 2446
2352 2556
2290 2623
2488 2402
2271 2611
1966 2578
2546 2078
2408 2615
2570 2070
1985 2485
2125 2518
2074 2404
2619 2469
2320 2444
2172 2020
2339 2506
2538 2268
2055 2229
2180 2081
2464 2654
2028 1932
2309 2356
1983 2410
2384 1941
2436 2047
2056 2092
2492 2278
2336 2180
2607 2056
2464 2542
2273 2608
2236 1975
2597 1994
2266 2331
2386 1962
2347 1997
2240 2579
2292 2081
1941 2300
2018 2364
2078 2253
2484 2253
2395 2423
2649 2399
2537 2101
2590 2507
1989 2404
1966 2526
2095 2154
2359 2210
1943 2408
2475 2161
2642 2198
2122 2607
1959 2597
2152 1949
2594 2183
2508 2372
2243 1939
2543 2246
2603 2155
2229 2430
1917 2499
2647 2364
2229 1962
2121 2218
2220 2063
2619 2275
2311 2324
2485 2600
2260 2289
2103 2043
2078 2561
2083 2220
2346 2657
2111 2199
2247 2475
2289 2473
2394 2390
2657 1957
2279 2143
2280 2068
1964 2618
2206 2560
2199 2390
2293 1959
2461 2582
2289 2463
2271 2404
2547 2087
2614 2558
2552 2546
1943 2593
2253 2489
2180 2285
2084 2504
2419 2226
2266 2336
2509 2235
2165 2142
2448 2628
2078 2278
1954 2297
1938 2103
2606 2551
2489 2086
1959 2451
1955 2224
1986 2433
2247 2007
1940 2436
2294 2250
2206 2352
2103 2200
2543 2458
2109 2308
2304 2246
2321 2034
2328 2273
2420 2241
2602 2464
2406 2036
1577 2163
2162 2325
2512 2398
1916 2133
2171 2648
2579 2307
2526 1985
2067 2300
2271 2046
2025 2011
1932 2223
2007 2417
2001 2027
2095 2395
2604 2007
2037 2460
2088 2615
2451 2608
2600 1917
2125 2138
2419 2516
2276 2370
1926 2347
2428 2123
2602 2573
2149 2582
2347 2508
2055 2307
2649 1577
2343 2102
2467 2625
2386 2266
1972 2494
2611 2395
1945 2196
2163 2344
2575 2122
2544 2302
2352 2037
1993 1918
1964 1974
2112 2539
2348 2131
2385 2117
2579 2290
2460 2414
1577 2148
2078 2339
2299 2631
2434 2461
2268 1926
2307 2188
2347 2332
1916 2463
2038 2642
2062 2282
2511 2608
2339 2600
2367 2571
2498 1959
2331 2064
2340 2348
2305 2372
2084 2395
2074 2500
1979 2590
2636 2346
2292 2472
2237 2543
1946 2311
1938 2218
2030 2275
2369 2370
2060 2331
2643 2028
1986 2188
2131 2037
1945 2143
2449 2019
2202 2459
2037 2593
1917 2624
1985 2464
2220 2206
2582 2039
2266 2615
2334 1962
2428 2429
2576 2090
2153 2420
2206 2339
2364 2024
2430 1925
1984 2165
2109 2073
2055 1989
2325 2111
2500 2104
2030 2468
2488 2570
2635 2187
2052 2333
2654 2561
2395 2210
2593 1929
2161 2235
2374 1929
2460 2118
2418 2638
2370 1941
2642 2247
2601 2329
2229 2593
2117 2226
2332 2111
1993 2423
1954 2461
2218 2237
2552 2276
2124 2212
2282 2194
2543 2188
2507 2229
2289 2187
2365 2050
2253 2154
1980 1999
2560 2414
1973 2435
2608 2149
2078 2374
2289 2643
2308 2154
2611 1946
2077 2299
2423 2033
2526 2521
2623 2469
2271 1953
2512 2189
2102 1945
2443 1984
2237 2395
2111 2222
2254 2072
2477 2619
2600 2088
2002 2279
2143 2368
2220 2542
2354 2575
2068 2398
2324 1997
2543 1979
2282 1926
1465 2138
2313 2029
2374 2271
2628 2317
2631 2404
1916 2555
1971 2504
2109 2573
2323 2563
2001 2171
2578 2428
2480 2416
2501 2199
2235 2155
2433 2212
2347 2600
2386 2521
2578 2410
2244 2299
2037 2201
1953 2122
2064 2103
2624 2131
2419 2557
2124 2623
2090 2604
2428 2410
2109 2464
2308 2604
2054 2032
2032 2582
2132 2438
2278 2184
2011 2660
2068 2187
2090 2553
2377 2132
1925 2549
136 1932
2111 2512
2453 2651
2355 2594
2093 2077
2511 2187
2574 2206
2623 2369
2313 2214
1957 1935
1962 2374
2065 2087
1959 2203
2117 2653
2020 2212
2397 2231
2201 2601
2494 2297
2285 2294
2030 2088
2654 2179
2062 2125
2590 2331
1947 2102
2660 2001
2028 2475
2653 2196
2367 2366
2340 2108
2339 2093
2313 2228
2323 2615
2394 2603
1970 2151
1932 2224
2307 2556
2552 2526
2398 2384
2532 1917
2526 2077
2327 2436
2537 2280
2550 2103
2144 2047
2560 2271
2200 2278
2201 2324
2324 2593
2173 2503
2229 2046
2121 2615
2429 2467
2608 2473
2220 2179
2463 2533
2060 2553
2261 2331
2354 2500
2543 2038
2392 2118
2310 2047
2584 2019
2063 2309
2630 2492
1964 2313
2567 2010
2010 1577
2463 2649
2561 2430
2652 2434
2542 2309
2381 2593
2147 2575
2485 2655
2438 2062
2087 1985
2646 1943
2121 2190
1920 2616
2038 2211
2144 2465
1997 2352
2084 2123
2122 2590
1997 2409
2123 2356
2334 2271
2139 2560
2460 2553
2159 1919
2123 2630
2283 1920
2287 2326
2271 2140
2069 2306
2430 2220
2333 2508
2144 2223
1997 2240
2576 1917
2072 2468
2142 2446
2319 2394
1970 2434
1971 2123
2333 2603
2190 2539
2145 2236
2042 1940
1979 2631
2519 2512
2069 2150
2006 2494
2059 2184
2139 2526
2521 2395
2550 2408
2143 2042
2623 2504
2161 1939
2551 2384
2118 1979
2579 2556
1926 2322
2537 2592
2341 2162
2037 2428
2328 1970
2339 2601
2264 2183
2546 2418
2069 2324
2585 1951
2585 2001
2126 2091
2340 2504
2600 1953
2423 2206
2201 1963
1984 2602
2331 2539
2604 1993
2104 2601
2133 2436
2088 2078
1998 2004
2602 2387
2601 2575
2084 2331
2187 1718
2258 2410
2549 2477
2150 2554
2409 2507
2081 2057
2409 2418
2188 1917
2409 2563
2410 2063
2339 2190
1983 2476
2218 1929
2526 2374
2026 2268
2386 2654
2475 2174
1999 1973
2092 2383
1941 2068
1941 2293
2047 2081
2261 2464
1914 2660
2435 1972
2583 1927
2060 2348
2028 2180
2200 2233
2529 2338
2404 2410
2617 2603
2395 2060
2064 2045
2031 1964
2157 1995
2218 2055
2236 2145
2340 2331
1984 2536
2579 2306
2363 2520
2042 2347
2538 2022
2191 2643
2464 2063
2266 2387
2430 2154
2171 2633
2643 1577
2655 2115
2363 2326
2257 2201
2173 1949
2031 2416
2149 2047
2189 2611
2563 2095
2050 1973
2153 2250
2307 2542
2296 2379
2552 1984
2319 1926
1981 2199
2611 2536
2340 1941
2488 2070
2088 2237
2313 2100
2093 2115
2331 2578
2223 2174
2031 1718
2600 2098
2607 2521
2371 2035
2132 2161
2564 1943
2043 2078
2643 2053
2103 2093
2395 1946
2262 2350
2471 1920
2436 2635
1959 2042
2625 2122
2153 2377
2564 2464
2047 2144
2348 2240
2445 1959
1926 2285
2484 2179
2484 2376
2190 2218
2354 2278
2132 2185
2043 2600
2176 2031
2005 1983
2060 2464
2433 2356
2458 2071
2063 2124
2630 2520
2326 2213
2240 2074
2630 2484
2384 2567
2165 2218
2377 2151
2069 2369
2299 1979
2356 2521
1973 1914
2386 2348
2436 2498
2257 2602
2509 1970
2278 2172
2030 2154
1976 2447
2151 2616
2575 2257
1957 1968
2404 2553
1984 1983
2187 2315
2386 2123
2277 2231
2414 1943
2024 2459
2275 2607
2142 2551
1929 2484
2211 2047
2253 2504
2139 2386
2115 2561
2363 2469
2026 2567
2125 2149
2625 2464
2630 2485
2001 2494
2627 1998
2294 2372
2429 2387
1981 2280
2237 2381
2081 2243
2285 1941
1577 2351
2419 2224
2495 2329
2237 2500
1948 1941
2163 2399
2206 2308
2611 2276
2494 2225
2043 2363
1920 2151
2496 2567
2609 2081
2428 2326
2498 2325
1959 2328
2339 2206
2224 2125
1916 2509
2156 2322
2482 2244
1987 2138
2307 2339
2603 1981
2087 2491
2122 2553
2333 2328
2133 2333
2510 2137
2315 1955
2465 2510
2037 2578
2542 2088
2404 2064
2557 2318
2624 2172
2214 2031
2318 2029
2646 2040
1986 2118
2468 2492
2332 2249
2275 2154
2630 2574
2268 2394
2356 2308
2448 2440
2268 2127
2266 2552
2123 2233
2391 2154
1915 2114
2550 2414
2646 2553
2652 2438
2604 2428
2005 2309
1972 1957
2649 2330
2283 2133
2005 2229
2386 2045
2116 2011
2325 2155
2639 1976
2242 2642
2539 2253
2303 2007
2057 2530
2308 2150
2323 2504
1936 1978
2384 2026
2589 2458
2328 2102
2462 1993
2240 2560
2619 1971
2519 2399
2073 2354
2526 2542
2090 2469
2253 2464
2461 2039
2040 2229
2045 1929
2507 2464
2284 1957
2037 2095
2491 2436
2465 2191
2654 2030
2507 2200
2191 2338
2521 2324
2510 2643
2010 2582
2233 2351
2559 2257
2093 2579
2448 2397
2653 2642
2218 2363
2334 2429
2221 2384
2029 2581
2601 2563
2203 2582
2237 2150
2244 2423
2471 1939
2326 2553
2110 2537
2126 2424
2519 2419
2463 2351
2336 2223
1993 2306
2276 2046
1963 2124
1939 2328
2378 2012
2365 2659
2646 2266
2404 2258
2374 2376
2302 2133
2123 2477
2208 2324
1577 2127
2069 2258
2344 2652
2279 1465
2095 2500
2556 2124
2631 1966
2117 2224
1985 2524
2176 2047
2074 2507
2099 2091
2202 2647
2617 2567
2292 2508
1982 2262
2093 2429
2077 2619
1918 2410
2356 2564
2104 2290
1966 2088
2027 1958
1946 2140
1948 2344
1917 2063
2602 1946
2064 2407
2351 2134
2201 2131
2133 2463
2191 2472
2165 2543
2343 2338
2598 2582
1943 1985
1917 2030
2086 2078
2303 1943
2053 2223
2047 2305
2267 2087
2033 2131
2554 2299
2542 2164
2172 2495
2081 1964
1966 2550
2407 2240
2241 2592
2408 2258
2516 2032
2638 2271
2161 2294
2087 2071
2125 2071
1983 2646
2194 2302
2473 2322
2197 2313
2189 2184
2552 2266
2223 2138
2253 2460
1917 2469
2095 2220
2187 2543
2555 2599
2275 2601
2563 2201
2124 1938
2264 2368
2302 2471
1942 2084
2526 2278
2511 2302
2600 2507
2150 2154
2319 1940
2297 1958
2551 2646
2398 2138
2354 2188
2072 2294
1943 2184
2086 2564
2420 2533
2395 2408
2307 2353
2334 2507
2243 2336
2589 2072
2212 2469
2370 2308
2294 2343
2440 2289
2179 2220
2649 2279
2420 2468
2377 2247
2638 2108
2222 2096
2058 2234
2067 2019
2200 2495
2109 2290
2233 2300
2225 2627
2259 2347
2589 2555
1955 2183
2304 2125
2218 2275
2063 2601
2237 2430
2611 2524
2550 2123
2508 2117
2344 2254
2250 1913
2073 2109
2542 2553
2313 2120
2063 2261
2039 2117
2613 2139
2551 2550
1921 1935
2329 2467
2225 2097
2141 2362
2560 2069
2630 2370
1955 2592
1945 2347
2574 2495
2520 2578
2103 2347
2028 1577
2649 2148
2332 2052
2318 1964
2369 2561
2578 2229
1991 2061
1943 2551
2518 2458
2352 2064
2250 2629
2294 2007
2073 2201
2307 2606
2200 2257
2381 2124
2512 2068
2145 2525
2124 2339
1979 2040
2582 2163
2073 1925
2404 2210
2460 2323
2030 2520
1955 2279
2338 2174
2603 2419
2115 2324
2150 1941
2372 2385
1955 2302
2543 2047
2336 2057
1941 2601
1938 2299
1946 2206
2183 1920
2241 2072
2338 2032
1997 2499
2240 2276
2559 2109
2438 1952
2629 2026
2414 2352
2489 2043
2575 2043
1920 2223
2601 2347
2192 2202
2474 1960
2370 2553
2206 2561
1916 2149
2215 2047
2550 2190
2063 2216
2363 2414
2428 2059
2434 2241
2143 2002
2194 2609
2549 2212
2046 2495
2617 2250
2306 2446
2006 2645
2154 1946
1953 2123
1929 2359
2328 2427
2083 2478
2478 2512
2123 2625
2630 2206
2623 2150
2410 2088
1917 2043
2191 2007
2232 2280
2292 2135
2519 2377
2102 2279
2293 2068
2207 2550
2243 2438
1966 2615
2247 2355
1973 1927
2553 2464
2302 2567
2246 2032
2292 2581
2233 2098
2008 2455
2500 2604
2131 2607
2328 2128
2254 2087
2093 2638
2062 2434
2477 2139
2086 2414
2602 2376
1971 2625
2506 2045
2040 2575
2364 2157
2555 2653
2409 2331
2463 2327
2500 2485
2578 2233
2575 2233
2394 2279
2136 2376
2169 2203
2184 2552
2552 2561
2128 2246
2172 2554
1958 2171
1917 2244
2064 2244
2324 2220
2304 2128
2153 2102
2512 2132
2037 2046
2218 2624
2027 2337
2299 2409
2002 2128
2101 1926
2237 2363
1921 2001
2554 1962
2086 2005
2134 2283
2139 2037
1962 2020
2533 2398
2553 2542
2218 2559
2434 2617
2184 2578
1962 2495
2532 2387
2395 2307
2114 2228
2033 2077
[truncated: 200,283 more chars]
