# Supplementary material
Source: ML conference proceedings conference paper supplement (https://proceedings.neurips.cc/paper_files/paper/2022/hash/6faf3b8ed0df532c14d0fc009e451b6d-Abstract.html)
Supplement: Supplementary file 1 [file 6faf3b8ed0df532c14d0fc009e451b6d-Supplemental-Conference.zip › codes/dataset/movies.csv]

movieId	title	genres
1	Toy Story (1995)	Adventure|Animation|Children|Comedy|Fantasy
2	Jumanji (1995)	Adventure|Children|Fantasy
3	Grumpier Old Men (1995)	Comedy|Romance
4	Waiting to Exhale (1995)	Comedy|Drama|Romance
5	Father of the Bride Part II (1995)	Comedy
6	Heat (1995)	Action|Crime|Thriller
7	Sabrina (1995)	Comedy|Romance
8	Tom and Huck (1995)	Adventure|Children
9	Sudden Death (1995)	Action
10	GoldenEye (1995)	Action|Adventure|Thriller
11	American President, The (1995)	Comedy|Drama|Romance
12	Dracula: Dead and Loving It (1995)	Comedy|Horror
13	Balto (1995)	Adventure|Animation|Children
14	Nixon (1995)	Drama
15	Cutthroat Island (1995)	Action|Adventure|Romance
16	Casino (1995)	Crime|Drama
17	Sense and Sensibility (1995)	Drama|Romance
18	Four Rooms (1995)	Comedy
19	Ace Ventura: When Nature Calls (1995)	Comedy
20	Money Train (1995)	Action|Comedy|Crime|Drama|Thriller
21	Get Shorty (1995)	Comedy|Crime|Thriller
22	Copycat (1995)	Crime|Drama|Horror|Mystery|Thriller
23	Assassins (1995)	Action|Crime|Thriller
24	Powder (1995)	Drama|Sci-Fi
25	Leaving Las Vegas (1995)	Drama|Romance
26	Othello (1995)	Drama
27	Now and Then (1995)	Children|Drama
28	Persuasion (1995)	Drama|Romance
29	City of Lost Children, The (Cité des enfants perdus, La) (1995)	Adventure|Drama|Fantasy|Mystery|Sci-Fi
30	Shanghai Triad (Yao a yao yao dao waipo qiao) (1995)	Crime|Drama
31	Dangerous Minds (1995)	Drama
32	Twelve Monkeys (a.k.a. 12 Monkeys) (1995)	Mystery|Sci-Fi|Thriller
33	Wings of Courage (1995)	Adventure|Romance|IMAX
34	Babe (1995)	Children|Drama
35	Carrington (1995)	Drama|Romance
36	Dead Man Walking (1995)	Crime|Drama
37	Across the Sea of Time (1995)	Documentary|IMAX
38	It Takes Two (1995)	Children|Comedy
39	Clueless (1995)	Comedy|Romance
40	Cry, the Beloved Country (1995)	Drama
41	Richard III (1995)	Drama|War
42	Dead Presidents (1995)	Action|Crime|Drama
43	Restoration (1995)	Drama
44	Mortal Kombat (1995)	Action|Adventure|Fantasy
45	To Die For (1995)	Comedy|Drama|Thriller
46	How to Make an American Quilt (1995)	Drama|Romance
47	Seven (a.k.a. Se7en) (1995)	Mystery|Thriller
48	Pocahontas (1995)	Animation|Children|Drama|Musical|Romance
49	When Night Is Falling (1995)	Drama|Romance
50	Usual Suspects, The (1995)	Crime|Mystery|Thriller
51	Guardian Angel (1994)	Action|Drama|Thriller
52	Mighty Aphrodite (1995)	Comedy|Drama|Romance
53	Lamerica (1994)	Adventure|Drama
54	Big Green, The (1995)	Children|Comedy
55	Georgia (1995)	Drama
56	Kids of the Round Table (1995)	Adventure|Children|Fantasy
57	Home for the Holidays (1995)	Drama
58	Postman, The (Postino, Il) (1994)	Comedy|Drama|Romance
59	Confessional, The (Confessionnal, Le) (1995)	Drama|Mystery
60	Indian in the Cupboard, The (1995)	Adventure|Children|Fantasy
61	Eye for an Eye (1996)	Drama|Thriller
62	Mr. Holland's Opus (1995)	Drama
63	Don't Be a Menace to South Central While Drinking Your Juice in the Hood (1996)	Comedy|Crime
64	Two if by Sea (1996)	Comedy|Romance
65	Bio-Dome (1996)	Comedy
66	Lawnmower Man 2: Beyond Cyberspace (1996)	Action|Sci-Fi|Thriller
67	Two Bits (1995)	Drama
68	French Twist (Gazon maudit) (1995)	Comedy|Romance
69	Friday (1995)	Comedy
70	From Dusk Till Dawn (1996)	Action|Comedy|Horror|Thriller
71	Fair Game (1995)	Action
72	Kicking and Screaming (1995)	Comedy|Drama
73	Misérables, Les (1995)	Drama|War
74	Bed of Roses (1996)	Drama|Romance
75	Big Bully (1996)	Comedy|Drama
76	Screamers (1995)	Action|Sci-Fi|Thriller
77	Nico Icon (1995)	Documentary
78	Crossing Guard, The (1995)	Action|Crime|Drama|Thriller
79	Juror, The (1996)	Drama|Thriller
80	White Balloon, The (Badkonake sefid) (1995)	Children|Drama
81	Things to Do in Denver When You're Dead (1995)	Crime|Drama|Romance
82	Antonia's Line (Antonia) (1995)	Comedy|Drama
83	Once Upon a Time... When We Were Colored (1995)	Drama|Romance
84	Last Summer in the Hamptons (1995)	Comedy|Drama
85	Angels and Insects (1995)	Drama|Romance
86	White Squall (1996)	Action|Adventure|Drama
87	Dunston Checks In (1996)	Children|Comedy
88	Black Sheep (1996)	Comedy
89	Nick of Time (1995)	Action|Thriller
90	Journey of August King, The (1995)	Drama
92	Mary Reilly (1996)	Drama|Horror|Thriller
93	Vampire in Brooklyn (1995)	Comedy|Horror|Romance
94	Beautiful Girls (1996)	Comedy|Drama|Romance
95	Broken Arrow (1996)	Action|Adventure|Thriller
96	In the Bleak Midwinter (1995)	Comedy|Drama
97	Hate (Haine, La) (1995)	Crime|Drama
98	Shopping (1994)	Action|Thriller
99	Heidi Fleiss: Hollywood Madam (1995)	Documentary
100	City Hall (1996)	Drama|Thriller
101	Bottle Rocket (1996)	Adventure|Comedy|Crime|Romance
102	Mr. Wrong (1996)	Comedy
103	Unforgettable (1996)	Mystery|Sci-Fi|Thriller
104	Happy Gilmore (1996)	Comedy
105	Bridges of Madison County, The (1995)	Drama|Romance
106	Nobody Loves Me (Keiner liebt mich) (1994)	Comedy|Drama
107	Muppet Treasure Island (1996)	Adventure|Children|Comedy|Musical
108	Catwalk (1996)	Documentary
109	Headless Body in Topless Bar (1995)	Comedy|Drama|Thriller
110	Braveheart (1995)	Action|Drama|War
111	Taxi Driver (1976)	Crime|Drama|Thriller
112	Rumble in the Bronx (Hont faan kui) (1995)	Action|Adventure|Comedy|Crime
113	Before and After (1996)	Drama|Mystery
114	Margaret's Museum (1995)	Drama
115	Happiness Is in the Field (Bonheur est dans le pré, Le) (1995)	Comedy
116	Anne Frank Remembered (1995)	Documentary
117	Young Poisoner's Handbook, The (1995)	Crime|Drama
118	If Lucy Fell (1996)	Comedy|Romance
119	Steal Big, Steal Little (1995)	Comedy
120	Race the Sun (1996)	Adventure|Comedy|Drama
121	Boys of St. Vincent, The (1992)	Drama
122	Boomerang (1992)	Comedy|Romance
123	Chungking Express (Chung Hing sam lam) (1994)	Drama|Mystery|Romance
124	Star Maker, The (Uomo delle stelle, L') (1995)	Drama
125	Flirting With Disaster (1996)	Comedy
126	NeverEnding Story III, The (1994)	Adventure|Children|Fantasy
127	Silences of the Palace, The (Saimt el Qusur) (1994)	Drama
128	Jupiter's Wife (1994)	Documentary
129	Pie in the Sky (1996)	Comedy|Romance
130	Angela (1995)	Drama
131	Frankie Starlight (1995)	Drama|Romance
132	Jade (1995)	Thriller
133	Nueba Yol (1995)	Comedy|Drama
134	Sonic Outlaws (1995)	Documentary
135	Down Periscope (1996)	Comedy
136	From the Journals of Jean Seberg (1995)	Documentary
137	Man of the Year (1995)	Documentary
138	Neon Bible, The (1995)	Drama
139	Target (1995)	Action|Drama
140	Up Close and Personal (1996)	Drama|Romance
141	Birdcage, The (1996)	Comedy
142	Shadows (Cienie) (1988)	Drama
143	Gospa (1995)	Drama
144	Brothers McMullen, The (1995)	Comedy
145	Bad Boys (1995)	Action|Comedy|Crime|Drama|Thriller
146	Amazing Panda Adventure, The (1995)	Adventure|Children
147	Basketball Diaries, The (1995)	Drama
148	Awfully Big Adventure, An (1995)	Drama
149	Amateur (1994)	Crime|Drama|Thriller
150	Apollo 13 (1995)	Adventure|Drama|IMAX
151	Rob Roy (1995)	Action|Drama|Romance|War
152	Addiction, The (1995)	Drama|Horror
153	Batman Forever (1995)	Action|Adventure|Comedy|Crime
154	Beauty of the Day (Belle de jour) (1967)	Drama
155	Beyond Rangoon (1995)	Adventure|Drama|War
156	Blue in the Face (1995)	Comedy|Drama
157	Canadian Bacon (1995)	Comedy|War
158	Casper (1995)	Adventure|Children
159	Clockers (1995)	Crime|Drama|Mystery
160	Congo (1995)	Action|Adventure|Mystery|Sci-Fi
161	Crimson Tide (1995)	Drama|Thriller|War
162	Crumb (1994)	Documentary
163	Desperado (1995)	Action|Romance|Western
164	Devil in a Blue Dress (1995)	Crime|Film-Noir|Mystery|Thriller
165	Die Hard: With a Vengeance (1995)	Action|Crime|Thriller
166	Doom Generation, The (1995)	Comedy|Crime|Drama
167	Feast of July (1995)	Drama
168	First Knight (1995)	Action|Drama|Romance
169	Free Willy 2: The Adventure Home (1995)	Adventure|Children|Drama
170	Hackers (1995)	Action|Adventure|Crime|Thriller
171	Jeffrey (1995)	Comedy|Drama
172	Johnny Mnemonic (1995)	Action|Sci-Fi|Thriller
173	Judge Dredd (1995)	Action|Crime|Sci-Fi
174	Jury Duty (1995)	Comedy
175	Kids (1995)	Drama
176	Living in Oblivion (1995)	Comedy
177	Lord of Illusions (1995)	Horror
178	Love & Human Remains (1993)	Comedy|Drama
179	Mad Love (1995)	Drama|Romance
180	Mallrats (1995)	Comedy|Romance
181	Mighty Morphin Power Rangers: The Movie (1995)	Action|Children
182	Moonlight and Valentino (1995)	Drama|Romance
183	Mute Witness (1994)	Comedy|Horror|Thriller
184	Nadja (1994)	Drama
185	Net, The (1995)	Action|Crime|Thriller
186	Nine Months (1995)	Comedy|Romance
187	Party Girl (1995)	Comedy
188	Prophecy, The (1995)	Fantasy|Horror|Mystery
189	Reckless (1995)	Comedy|Fantasy
190	Safe (1995)	Thriller
191	Scarlet Letter, The (1995)	Drama|Romance
192	Show, The (1995)	Documentary
193	Showgirls (1995)	Drama
194	Smoke (1995)	Comedy|Drama
195	Something to Talk About (1995)	Comedy|Drama|Romance
196	Species (1995)	Horror|Sci-Fi
197	Stars Fell on Henrietta, The (1995)	Drama
198	Strange Days (1995)	Action|Crime|Drama|Mystery|Sci-Fi|Thriller
199	Umbrellas of Cherbourg, The (Parapluies de Cherbourg, Les) (1964)	Drama|Musical|Romance
200	Tie That Binds, The (1995)	Thriller
201	Three Wishes (1995)	Drama|Fantasy
202	Total Eclipse (1995)	Drama|Romance
203	To Wong Foo, Thanks for Everything! Julie Newmar (1995)	Comedy
204	Under Siege 2: Dark Territory (1995)	Action
205	Unstrung Heroes (1995)	Comedy|Drama
206	Unzipped (1995)	Documentary
207	Walk in the Clouds, A (1995)	Drama|Romance
208	Waterworld (1995)	Action|Adventure|Sci-Fi
209	White Man's Burden (1995)	Drama
210	Wild Bill (1995)	Western
211	Browning Version, The (1994)	Drama
212	Bushwhacked (1995)	Adventure|Comedy|Crime|Mystery
213	Burnt by the Sun (Utomlyonnye solntsem) (1994)	Drama
214	Before the Rain (Pred dozhdot) (1994)	Drama|War
215	Before Sunrise (1995)	Drama|Romance
216	Billy Madison (1995)	Comedy
217	Babysitter, The (1995)	Drama|Thriller
218	Boys on the Side (1995)	Comedy|Drama
219	Cure, The (1995)	Drama
220	Castle Freak (1995)	Horror
222	Circle of Friends (1995)	Drama|Romance
223	Clerks (1994)	Comedy
224	Don Juan DeMarco (1995)	Comedy|Drama|Romance
225	Disclosure (1994)	Drama|Thriller
226	Dream Man (1995)	Thriller
227	Drop Zone (1994)	Action|Thriller
228	Destiny Turns on the Radio (1995)	Comedy
229	Death and the Maiden (1994)	Drama|Thriller
230	Dolores Claiborne (1995)	Drama|Thriller
231	Dumb & Dumber (Dumb and Dumber) (1994)	Adventure|Comedy
232	Eat Drink Man Woman (Yin shi nan nu) (1994)	Comedy|Drama|Romance
233	Exotica (1994)	Drama
234	Exit to Eden (1994)	Comedy
235	Ed Wood (1994)	Comedy|Drama
236	French Kiss (1995)	Action|Comedy|Romance
237	Forget Paris (1995)	Comedy|Romance
238	Far From Home: The Adventures of Yellow Dog (1995)	Adventure|Children
239	Goofy Movie, A (1995)	Animation|Children|Comedy|Romance
240	Hideaway (1995)	Thriller
241	Fluke (1995)	Children|Drama
242	Farinelli: il castrato (1994)	Drama|Musical
243	Gordy (1995)	Children|Comedy|Fantasy
244	Gumby: The Movie (1995)	Animation|Children
245	Glass Shield, The (1994)	Crime|Drama
246	Hoop Dreams (1994)	Documentary
247	Heavenly Creatures (1994)	Crime|Drama
248	Houseguest (1994)	Comedy
249	Immortal Beloved (1994)	Drama|Romance
250	Heavyweights (Heavy Weights) (1995)	Children|Comedy
251	Hunted, The (1995)	Action
252	I.Q. (1994)	Comedy|Romance
253	Interview with the Vampire: The Vampire Chronicles (1994)	Drama|Horror
254	Jefferson in Paris (1995)	Drama
255	Jerky Boys, The (1995)	Comedy
256	Junior (1994)	Comedy|Sci-Fi
257	Just Cause (1995)	Mystery|Thriller
258	Kid in King Arthur's Court, A (1995)	Adventure|Children|Comedy|Fantasy|Romance
259	Kiss of Death (1995)	Crime|Drama|Thriller
260	Star Wars: Episode IV - A New Hope (1977)	Action|Adventure|Sci-Fi
261	Little Women (1994)	Drama
262	Little Princess, A (1995)	Children|Drama
263	Ladybird Ladybird (1994)	Drama
264	Enfer, L' (1994)	Drama
265	Like Water for Chocolate (Como agua para chocolate) (1992)	Drama|Fantasy|Romance
266	Legends of the Fall (1994)	Drama|Romance|War|Western
267	Major Payne (1995)	Comedy
268	Little Odessa (1994)	Crime|Drama
269	My Crazy Life (Mi vida loca) (1993)	Drama
270	Love Affair (1994)	Drama|Romance
271	Losing Isaiah (1995)	Drama
272	Madness of King George, The (1994)	Comedy|Drama
273	Mary Shelley's Frankenstein (Frankenstein) (1994)	Drama|Horror|Sci-Fi
274	Man of the House (1995)	Comedy
275	Mixed Nuts (1994)	Comedy
276	Milk Money (1994)	Comedy|Romance
277	Miracle on 34th Street (1994)	Drama
278	Miami Rhapsody (1995)	Comedy
279	My Family (1995)	Drama
280	Murder in the First (1995)	Drama|Thriller
281	Nobody's Fool (1994)	Comedy|Drama|Romance
282	Nell (1994)	Drama
283	New Jersey Drive (1995)	Crime|Drama
284	New York Cop (Nyû Yôku no koppu) (1993)	Action|Crime
285	Beyond Bedlam (1993)	Drama|Horror
286	Nemesis 2: Nebula (1995)	Action|Sci-Fi|Thriller
287	Nina Takes a Lover (1994)	Comedy|Romance
288	Natural Born Killers (1994)	Action|Crime|Thriller
289	Only You (1994)	Comedy|Romance
290	Once Were Warriors (1994)	Crime|Drama
291	Poison Ivy II (1996)	Drama|Thriller
292	Outbreak (1995)	Action|Drama|Sci-Fi|Thriller
293	Léon: The Professional (a.k.a. The Professional) (Léon) (1994)	Action|Crime|Drama|Thriller
294	Perez Family, The (1995)	Comedy|Romance
295	Pyromaniac's Love Story, A (1995)	Comedy|Romance
296	Pulp Fiction (1994)	Comedy|Crime|Drama|Thriller
297	Panther (1995)	Drama
298	Pushing Hands (Tui shou) (1992)	Drama
299	Priest (1994)	Drama
300	Quiz Show (1994)	Drama
301	Picture Bride (Bijo photo) (1994)	Drama|Romance
302	Queen Margot (Reine Margot, La) (1994)	Drama|Romance
303	Quick and the Dead, The (1995)	Action|Thriller|Western
304	Roommates (1995)	Comedy|Drama
305	Ready to Wear (Pret-A-Porter) (1994)	Comedy
306	Three Colors: Red (Trois couleurs: Rouge) (1994)	Drama
307	Three Colors: Blue (Trois couleurs: Bleu) (1993)	Drama
308	Three Colors: White (Trzy kolory: Bialy) (1994)	Comedy|Drama
309	Red Firecracker, Green Firecracker (Pao Da Shuang Deng) (1994)	Drama
310	Rent-a-Kid (1995)	Comedy
311	Relative Fear (1994)	Horror|Thriller
312	Stuart Saves His Family (1995)	Comedy
313	Swan Princess, The (1994)	Animation|Children
314	Secret of Roan Inish, The (1994)	Children|Drama|Fantasy|Mystery
315	Specialist, The (1994)	Action|Drama|Thriller
316	Stargate (1994)	Action|Adventure|Sci-Fi
317	Santa Clause, The (1994)	Comedy|Drama|Fantasy
318	Shawshank Redemption, The (1994)	Crime|Drama
319	Shallow Grave (1994)	Comedy|Drama|Thriller
320	Suture (1993)	Film-Noir|Thriller
321	Strawberry and Chocolate (Fresa y chocolate) (1993)	Drama
322	Swimming with Sharks (1995)	Comedy|Drama
324	Sum of Us, The (1994)	Comedy|Drama
325	National Lampoon's Senior Trip (1995)	Comedy
326	To Live (Huozhe) (1994)	Drama
327	Tank Girl (1995)	Action|Comedy|Sci-Fi
328	Tales from the Crypt Presents: Demon Knight (1995)	Horror|Thriller
329	Star Trek: Generations (1994)	Adventure|Drama|Sci-Fi
330	Tales from the Hood (1995)	Action|Crime|Horror
331	Tom & Viv (1994)	Drama
332	Village of the Damned (1995)	Horror|Sci-Fi
333	Tommy Boy (1995)	Comedy
334	Vanya on 42nd Street (1994)	Drama
335	Underneath (1995)	Mystery|Thriller
336	Walking Dead, The (1995)	Drama|War
337	What's Eating Gilbert Grape (1993)	Drama
338	Virtuosity (1995)	Action|Sci-Fi|Thriller
339	While You Were Sleeping (1995)	Comedy|Romance
340	War, The (1994)	Adventure|Drama|War
341	Double Happiness (1994)	Drama
342	Muriel's Wedding (1994)	Comedy
343	Baby-Sitters Club, The (1995)	Children
344	Ace Ventura: Pet Detective (1994)	Comedy
345	Adventures of Priscilla, Queen of the Desert, The (1994)	Comedy|Drama
346	Backbeat (1993)	Drama|Musical
347	Bitter Moon (1992)	Drama|Film-Noir|Romance
348	Bullets Over Broadway (1994)	Comedy
349	Clear and Present Danger (1994)	Action|Crime|Drama|Thriller
350	Client, The (1994)	Drama|Mystery|Thriller
351	Corrina, Corrina (1994)	Comedy|Drama|Romance
352	Crooklyn (1994)	Comedy|Drama
353	Crow, The (1994)	Action|Crime|Fantasy|Thriller
354	Cobb (1994)	Drama
355	Flintstones, The (1994)	Children|Comedy|Fantasy
356	Forrest Gump (1994)	Comedy|Drama|Romance|War
357	Four Weddings and a Funeral (1994)	Comedy|Romance
358	Higher Learning (1995)	Drama
359	I Like It Like That (1994)	Comedy|Drama|Romance
360	I Love Trouble (1994)	Action|Comedy
361	It Could Happen to You (1994)	Comedy|Drama|Romance
362	Jungle Book, The (1994)	Adventure|Children|Romance
363	Wonderful, Horrible Life of Leni Riefenstahl, The (Macht der Bilder: Leni Riefenstahl, Die) (1993)	Documentary
364	Lion King, The (1994)	Adventure|Animation|Children|Drama|Musical|IMAX
365	Little Buddha (1993)	Drama
366	Wes Craven's New Nightmare (Nightmare on Elm Street Part 7: Freddy's Finale, A) (1994)	Drama|Horror|Mystery|Thriller
367	Mask, The (1994)	Action|Comedy|Crime|Fantasy
368	Maverick (1994)	Adventure|Comedy|Western
369	Mrs. Parker and the Vicious Circle (1994)	Drama
370	Naked Gun 33 1/3: The Final Insult (1994)	Action|Comedy
371	Paper, The (1994)	Comedy|Drama
372	Reality Bites (1994)	Comedy|Drama|Romance
373	Red Rock West (1992)	Thriller
374	Richie Rich (1994)	Children|Comedy
375	Safe Passage (1994)	Drama
376	River Wild, The (1994)	Action|Thriller
377	Speed (1994)	Action|Romance|Thriller
378	Speechless (1994)	Comedy|Romance
379	Timecop (1994)	Action|Sci-Fi|Thriller
380	True Lies (1994)	Action|Adventure|Comedy|Romance|Thriller
381	When a Man Loves a Woman (1994)	Drama|Romance
382	Wolf (1994)	Drama|Horror|Romance|Thriller
383	Wyatt Earp (1994)	Western
384	Bad Company (1995)	Action|Crime|Drama
385	Man of No Importance, A (1994)	Drama
386	S.F.W. (1994)	Drama
387	Low Down Dirty Shame, A (1994)	Action|Comedy
388	Boys Life (1995)	Drama
389	Colonel Chabert, Le (1994)	Drama|Romance|War
390	Faster Pussycat! Kill! Kill! (1965)	Action|Crime|Drama
391	Jason's Lyric (1994)	Crime|Drama
392	Secret Adventures of Tom Thumb, The (1993)	Adventure|Animation
393	Street Fighter (1994)	Action|Adventure|Fantasy
394	Coldblooded (1995)	Comedy
395	Desert Winds (1995)	Drama|Fantasy|Romance
396	Fall Time (1995)	Drama
397	Fear, The (1995)	Horror
398	Frank and Ollie (1995)	Documentary
399	Girl in the Cadillac (1995)	Drama
400	Homage (1995)	Drama
401	Mirage (1995)	Action|Thriller
402	Open Season (1996)	Comedy
403	Two Crimes (Dos crímenes) (1995)	Comedy|Crime|Drama
404	Brother Minister: The Assassination of Malcolm X (1994)	Documentary
405	Highlander III: The Sorcerer (a.k.a. Highlander: The Final Dimension) (1994)	Action|Fantasy
406	Federal Hill (1994)	Drama
407	In the Mouth of Madness (1995)	Horror|Thriller
408	8 Seconds (1994)	Drama
409	Above the Rim (1994)	Crime|Drama
410	Addams Family Values (1993)	Children|Comedy|Fantasy
411	Martin Lawrence: You So Crazy (1994)	Comedy|Documentary
412	Age of Innocence, The (1993)	Drama
413	Airheads (1994)	Comedy
414	Air Up There, The (1994)	Comedy
415	Another Stakeout (1993)	Comedy|Thriller
416	Bad Girls (1994)	Western
417	Barcelona (1994)	Comedy|Romance
418	Being Human (1993)	Drama
419	Beverly Hillbillies, The (1993)	Comedy
420	Beverly Hills Cop III (1994)	Action|Comedy|Crime|Thriller
421	Black Beauty (1994)	Adventure|Children|Drama
422	Blink (1994)	Thriller
423	Blown Away (1994)	Action|Thriller
424	Blue Chips (1994)	Drama
425	Blue Sky (1994)	Drama|Romance
426	Body Snatchers (1993)	Horror|Sci-Fi|Thriller
427	Boxing Helena (1993)	Drama|Mystery|Romance|Thriller
428	Bronx Tale, A (1993)	Drama
429	Cabin Boy (1994)	Comedy
430	Calendar Girl (1993)	Comedy|Drama
431	Carlito's Way (1993)	Crime|Drama
432	City Slickers II: The Legend of Curly's Gold (1994)	Adventure|Comedy|Western
433	Clean Slate (1994)	Comedy
434	Cliffhanger (1993)	Action|Adventure|Thriller
435	Coneheads (1993)	Comedy|Sci-Fi
436	Color of Night (1994)	Drama|Thriller
437	Cops and Robbersons (1994)	Comedy
438	Cowboy Way, The (1994)	Action|Comedy|Drama
439	Dangerous Game (1993)	Drama
440	Dave (1993)	Comedy|Romance
441	Dazed and Confused (1993)	Comedy
442	Demolition Man (1993)	Action|Adventure|Sci-Fi
443	Endless Summer 2, The (1994)	Adventure|Documentary
444	Even Cowgirls Get the Blues (1993)	Comedy|Romance
445	Fatal Instinct (1993)	Comedy
446	Farewell My Concubine (Ba wang bie ji) (1993)	Drama|Romance
447	Favor, The (1994)	Comedy|Romance
448	Fearless (1993)	Drama
449	Fear of a Black Hat (1994)	Comedy
450	With Honors (1994)	Comedy|Drama
451	Flesh and Bone (1993)	Drama|Mystery|Romance
452	Widows' Peak (1994)	Drama
453	For Love or Money (1993)	Comedy|Romance
454	Firm, The (1993)	Drama|Thriller
455	Free Willy (1993)	Adventure|Children|Drama
456	Fresh (1994)	Crime|Drama|Thriller
457	Fugitive, The (1993)	Thriller
458	Geronimo: An American Legend (1993)	Drama|Western
459	Getaway, The (1994)	Action|Adventure|Crime|Drama|Romance|Thriller
460	Getting Even with Dad (1994)	Comedy
461	Go Fish (1994)	Drama|Romance
462	Good Man in Africa, A (1994)	Action|Adventure
463	Guilty as Sin (1993)	Crime|Drama|Thriller
464	Hard Target (1993)	Action|Adventure|Crime|Thriller
465	Heaven & Earth (1993)	Action|Drama|War
466	Hot Shots! Part Deux (1993)	Action|Comedy|War
467	Live Nude Girls (1995)	Comedy
468	Englishman Who Went Up a Hill But Came Down a Mountain, The (1995)	Comedy|Romance
469	House of the Spirits, The (1993)	Drama|Romance
470	House Party 3 (1994)	Comedy
471	Hudsucker Proxy, The (1994)	Comedy
472	I'll Do Anything (1994)	Comedy|Drama
473	In the Army Now (1994)	Comedy|War
474	In the Line of Fire (1993)	Action|Thriller
475	In the Name of the Father (1993)	Drama
476	Inkwell, The (1994)	Comedy|Drama
477	What's Love Got to Do with It? (1993)	Drama|Musical
478	Jimmy Hollywood (1994)	Comedy|Crime|Drama
479	Judgment Night (1993)	Action|Crime|Thriller
480	Jurassic Park (1993)	Action|Adventure|Sci-Fi|Thriller
481	Kalifornia (1993)	Drama|Thriller
482	Killing Zoe (1994)	Crime|Drama|Thriller
483	King of the Hill (1993)	Drama
484	Lassie (1994)	Adventure|Children
485	Last Action Hero (1993)	Action|Adventure|Comedy|Fantasy
486	Life with Mikey (1993)	Comedy
487	Lightning Jack (1994)	Comedy|Western
488	M. Butterfly (1993)	Drama|Romance
489	Made in America (1993)	Comedy
490	Malice (1993)	Thriller
491	Man Without a Face, The (1993)	Drama
492	Manhattan Murder Mystery (1993)	Comedy|Mystery
493	Menace II Society (1993)	Action|Crime|Drama
494	Executive Decision (1996)	Action|Adventure|Thriller
495	In the Realm of the Senses (Ai no corrida) (1976)	Drama
496	What Happened Was... (1994)	Comedy|Drama|Romance|Thriller
497	Much Ado About Nothing (1993)	Comedy|Romance
498	Mr. Jones (1993)	Drama|Romance
499	Mr. Wonderful (1993)	Comedy|Romance
500	Mrs. Doubtfire (1993)	Comedy|Drama
501	Naked (1993)	Drama
502	Next Karate Kid, The (1994)	Action|Children|Romance
503	New Age, The (1994)	Drama
504	No Escape (1994)	Action|Drama|Sci-Fi
505	North (1994)	Comedy
506	Orlando (1992)	Drama|Fantasy|Romance
507	Perfect World, A (1993)	Crime|Drama|Thriller
508	Philadelphia (1993)	Drama
509	Piano, The (1993)	Drama|Romance
510	Poetic Justice (1993)	Drama
511	Program, The (1993)	Action|Drama
512	Puppet Masters, The (1994)	Horror|Sci-Fi
513	Radioland Murders (1994)	Comedy|Mystery|Romance
514	Ref, The (1994)	Comedy
515	Remains of the Day, The (1993)	Drama|Romance
516	Renaissance Man (1994)	Comedy|Drama
517	Rising Sun (1993)	Action|Drama|Mystery
518	Road to Wellville, The (1994)	Comedy
519	RoboCop 3 (1993)	Action|Crime|Drama|Sci-Fi|Thriller
520	Robin Hood: Men in Tights (1993)	Comedy
521	Romeo Is Bleeding (1993)	Crime|Thriller
522	Romper Stomper (1992)	Action|Drama
523	Ruby in Paradise (1993)	Drama
524	Rudy (1993)	Drama
525	Saint of Fort Washington, The (1993)	Drama
526	Savage Nights (Nuits fauves, Les) (1992)	Drama
527	Schindler's List (1993)	Drama|War
528	Scout, The (1994)	Comedy|Drama
529	Searching for Bobby Fischer (1993)	Drama
530	Second Best (1994)	Drama
531	Secret Garden, The (1993)	Children|Drama
532	Serial Mom (1994)	Comedy|Crime|Horror
533	Shadow, The (1994)	Action|Adventure|Fantasy|Mystery
534	Shadowlands (1993)	Drama|Romance
535	Short Cuts (1993)	Drama
536	Simple Twist of Fate, A (1994)	Drama
537	Sirens (1994)	Drama
538	Six Degrees of Separation (1993)	Drama
539	Sleepless in Seattle (1993)	Comedy|Drama|Romance
540	Sliver (1993)	Thriller
541	Blade Runner (1982)	Action|Sci-Fi|Thriller
542	Son in Law (1993)	Comedy|Drama|Romance
543	So I Married an Axe Murderer (1993)	Comedy|Romance|Thriller
544	Striking Distance (1993)	Action|Crime
545	Harem (1985)	Drama
546	Super Mario Bros. (1993)	Action|Adventure|Children|Comedy|Fantasy|Sci-Fi
547	Surviving the Game (1994)	Action|Adventure|Thriller
548	Terminal Velocity (1994)	Action|Mystery|Thriller
549	Thirty-Two Short Films About Glenn Gould (1993)	Drama|Musical
550	Threesome (1994)	Comedy|Romance
551	Nightmare Before Christmas, The (1993)	Animation|Children|Fantasy|Musical
552	Three Musketeers, The (1993)	Action|Adventure|Comedy|Romance
553	Tombstone (1993)	Action|Drama|Western
554	Trial by Jury (1994)	Crime|Drama|Thriller
555	True Romance (1993)	Crime|Thriller
556	War Room, The (1993)	Documentary
558	Pagemaster, The (1994)	Action|Adventure|Animation|Children|Fantasy
559	Paris, France (1993)	Comedy
560	Beans of Egypt, Maine, The (1994)	Drama
561	Killer (Bulletproof Heart) (1994)	Drama|Thriller
562	Welcome to the Dollhouse (1995)	Comedy|Drama
563	Germinal (1993)	Drama|Romance
564	Chasers (1994)	Comedy
565	Cronos (1993)	Drama|Horror
566	Naked in New York (1994)	Comedy|Romance
567	Kika (1993)	Comedy|Drama
568	Bhaji on the Beach (1993)	Comedy|Drama
569	Little Big League (1994)	Comedy|Drama
570	Slingshot, The (Kådisbellan) (1993)	Comedy|Drama
571	Wedding Gift, The (1994)	Drama|Romance
572	Foreign Student (1994)	Drama
573	Ciao, Professore! (Io speriamo che me la cavo) (1992)	Drama
574	Spanking the Monkey (1994)	Comedy|Drama
575	Little Rascals, The (1994)	Children|Comedy
576	Fausto (1993)	Comedy
577	Andre (1994)	Adventure|Children|Drama
579	Escort, The (Scorta, La) (1993)	Crime|Thriller
580	Princess Caraboo (1994)	Drama
581	Celluloid Closet, The (1995)	Documentary
582	Métisse (Café au Lait) (1993)	Comedy|Drama
583	Dear Diary (Caro Diario) (1994)	Comedy|Drama
584	I Don't Want to Talk About It (De eso no se habla) (1993)	Drama|Romance
585	Brady Bunch Movie, The (1995)	Comedy
586	Home Alone (1990)	Children|Comedy
587	Ghost (1990)	Comedy|Drama|Fantasy|Romance|Thriller
588	Aladdin (1992)	Adventure|Animation|Children|Comedy|Musical
589	Terminator 2: Judgment Day (1991)	Action|Sci-Fi
590	Dances with Wolves (1990)	Adventure|Drama|Western
591	Tough and Deadly (1995)	Action|Drama|Thriller
592	Batman (1989)	Action|Crime|Thriller
593	Silence of the Lambs, The (1991)	Crime|Horror|Thriller
594	Snow White and the Seven Dwarfs (1937)	Animation|Children|Drama|Fantasy|Musical
595	Beauty and the Beast (1991)	Animation|Children|Fantasy|Musical|Romance|IMAX
596	Pinocchio (1940)	Animation|Children|Fantasy|Musical
597	Pretty Woman (1990)	Comedy|Romance
598	Window to Paris (Okno v Parizh) (1994)	Comedy|Fantasy
599	Wild Bunch, The (1969)	Adventure|Western
600	Love and a .45 (1994)	Action|Comedy|Crime
601	Wooden Man's Bride, The (Yan shen) (1994)	Drama
602	Great Day in Harlem, A (1994)	Documentary
603	Bye Bye, Love (1995)	Comedy
604	Criminals (1996)	Documentary
605	One Fine Day (1996)	Drama|Romance
606	Candyman: Farewell to the Flesh (1995)	Fantasy|Horror
607	Century (1993)	Drama
608	Fargo (1996)	Comedy|Crime|Drama|Thriller
609	Homeward Bound II: Lost in San Francisco (1996)	Adventure|Children
610	Heavy Metal (1981)	Action|Adventure|Animation|Horror|Sci-Fi
611	Hellraiser: Bloodline (1996)	Action|Horror|Sci-Fi
612	Pallbearer, The (1996)	Comedy
613	Jane Eyre (1996)	Drama|Romance
614	Loaded (1994)	Drama|Thriller
615	Bread and Chocolate (Pane e cioccolata) (1973)	Comedy|Drama
616	Aristocats, The (1970)	Animation|Children
617	Flower of My Secret, The (La flor de mi secreto) (1995)	Comedy|Drama
618	Two Much (1995)	Comedy|Romance
619	Ed (1996)	Comedy
620	Scream of Stone (Cerro Torre: Schrei aus Stein) (1991)	Drama
621	My Favorite Season (1993)	Drama
623	Modern Affair, A (1995)	Romance
624	Condition Red (Beyond the Law) (1995)	Action|Drama|Thriller
625	Asfour Stah (1990)	Drama
626	Thin Line Between Love and Hate, A (1996)	Comedy
627	Last Supper, The (1995)	Drama|Thriller
628	Primal Fear (1996)	Crime|Drama|Mystery|Thriller
629	Rude (1995)	Drama
630	Carried Away (1996)	Drama|Romance
631	All Dogs Go to Heaven 2 (1996)	Adventure|Animation|Children|Fantasy|Musical|Romance
632	Land and Freedom (Tierra y libertad) (1995)	Drama|War
633	Denise Calls Up (1995)	Comedy
634	Theodore Rex (1995)	Comedy
635	Family Thing, A (1996)	Comedy|Drama
636	Frisk (1995)	Drama
637	Sgt. Bilko (1996)	Comedy
638	Jack and Sarah (1995)	Romance
639	Girl 6 (1996)	Comedy|Drama
640	Diabolique (1996)	Drama|Thriller
641	Little Indian, Big City (Un indien dans la ville) (1994)	Adventure|Children|Comedy
642	Roula (1995)	Drama
643	Peanuts - Die Bank zahlt alles (1996)	Comedy
644	Happy Weekend (1996)	Comedy
645	Nelly & Monsieur Arnaud (1995)	Drama
647	Courage Under Fire (1996)	Action|Crime|Drama|War
648	Mission: Impossible (1996)	Action|Adventure|Mystery|Thriller
649	Cold Fever (Á köldum klaka) (1995)	Comedy|Drama
650	Moll Flanders (1996)	Drama
651	Superweib, Das (1996)	Comedy
652	301, 302 (301/302) (1995)	Horror|Mystery|Thriller
653	Dragonheart (1996)	Action|Adventure|Fantasy
654	And Nobody Weeps for Me (Und keiner weint mir nach) (1996)	Drama|Romance
655	My Mother's Courage (Mutters Courage) (1995)	Comedy
656	Eddie (1996)	Comedy
657	Yankee Zulu (1994)	Comedy|Drama
658	Billy's Holiday (1995)	Drama|Musical
659	Purple Noon (Plein soleil) (1960)	Crime|Drama|Thriller
660	August (1996)	Drama
661	James and the Giant Peach (1996)	Adventure|Animation|Children|Fantasy|Musical
662	Fear (1996)	Thriller
663	Kids in the Hall: Brain Candy (1996)	Comedy
664	Faithful (1996)	Comedy
665	Underground (1995)	Comedy|Drama|War
666	All Things Fair (Lust och fägring stor) (1995)	Drama|Romance|War
667	Bloodsport 2 (a.k.a. Bloodsport II: The Next Kumite) (1996)	Action
668	Song of the Little Road (Pather Panchali) (1955)	Drama
670	World of Apu, The (Apur Sansar) (1959)	Drama
671	Mystery Science Theater 3000: The Movie (1996)	Comedy|Sci-Fi
672	Tarantella (1995)	Drama
673	Space Jam (1996)	Adventure|Animation|Children|Comedy|Fantasy|Sci-Fi
674	Barbarella (1968)	Adventure|Comedy|Sci-Fi
675	Hostile Intentions (1994)	Action|Drama|Thriller
676	They Bite (1996)	Comedy|Horror|Sci-Fi
678	Some Folks Call It a Sling Blade (1993)	Drama|Thriller
679	Run of the Country, The (1995)	Drama
680	Alphaville (Alphaville, une étrange aventure de Lemmy Caution) (1965)	Drama|Mystery|Romance|Sci-Fi|Thriller
681	Coup de torchon (Clean Slate) (1981)	Crime
682	Tigrero: A Film That Was Never Made (1994)	Documentary|Drama
683	Eye of Vichy, The (Oeil de Vichy, L') (1993)	Documentary
684	Windows (1980)	Drama
685	It's My Party (1996)	Drama
687	Country Life (1994)	Drama|Romance
688	Operation Dumbo Drop (1995)	Action|Adventure|Comedy|War
690	Promise, The (Versprechen, Das) (1995)	Drama|Romance
691	Mrs. Winterbourne (1996)	Comedy|Romance
692	Solo (1996)	Action|Sci-Fi|Thriller
693	Under the Domim Tree (Etz Hadomim Tafus) (1994)	Drama
694	Substitute, The (1996)	Action|Crime|Drama
695	True Crime (1996)	Mystery|Thriller
696	Butterfly Kiss (1995)	Drama|Thriller
697	Feeling Minnesota (1996)	Drama|Romance
698	Delta of Venus (1995)	Drama
699	To Cross the Rubicon (1991)	Drama
700	Angus (1995)	Comedy
701	Daens (1992)	Drama
702	Faces (1968)	Drama
703	Boys (1996)	Drama
704	Quest, The (1996)	Action|Adventure
705	Cosi (1996)	Comedy
706	Sunset Park (1996)	Drama
707	Mulholland Falls (1996)	Crime|Drama|Thriller
708	Truth About Cats & Dogs, The (1996)	Comedy|Romance
709	Oliver & Company (1988)	Adventure|Animation|Children|Comedy|Musical
710	Celtic Pride (1996)	Comedy
711	Flipper (1996)	Adventure|Children
712	Captives (1994)	Crime|Drama|Romance|Thriller
713	Of Love and Shadows (1994)	Drama
714	Dead Man (1995)	Drama|Mystery|Western
715	Horseman on the Roof, The (Hussard sur le toit, Le) (1995)	Drama|Romance
716	Switchblade Sisters (1975)	Crime
717	Mouth to Mouth (Boca a boca) (1995)	Comedy
718	Visitors, The (Visiteurs, Les) (1993)	Comedy|Fantasy|Sci-Fi
719	Multiplicity (1996)	Comedy
720	Wallace & Gromit: The Best of Aardman Animation (1996)	Adventure|Animation|Comedy
721	Halfmoon (Paul Bowles - Halbmond) (1995)	Drama
722	Haunted World of Edward D. Wood Jr., The (1996)	Documentary
723	Two Friends (1986)	Drama
724	Craft, The (1996)	Drama|Fantasy|Horror|Thriller
725	Great White Hype, The (1996)	Comedy
726	Last Dance (1996)	Drama
727	War Stories (1995)	Documentary
728	Cold Comfort Farm (1995)	Comedy
729	Institute Benjamenta, or This Dream People Call Human Life (1995)	Drama
730	Low Life (1994)	Drama
731	Heaven's Prisoners (1996)	Crime|Thriller
732	Original Gangstas (1996)	Crime
733	Rock, The (1996)	Action|Adventure|Thriller
734	Getting Away With Murder (1996)	Comedy
735	Cemetery Man (Dellamorte Dellamore) (1994)	Horror
736	Twister (1996)	Action|Adventure|Romance|Thriller
737	Barb Wire (1996)	Action|Sci-Fi
738	Garçu, Le (1995)	Drama
739	Honey Moon (Honigmond) (1996)	Comedy
741	Ghost in the Shell (Kôkaku kidôtai) (1995)	Animation|Sci-Fi
742	Thinner (1996)	Horror|Thriller
743	Spy Hard (1996)	Comedy
744	Brothers in Trouble (1995)	Drama
745	Wallace & Gromit: A Close Shave (1995)	Animation|Children|Comedy
746	Force of Evil (1948)	Film-Noir
747	Stupids, The (1996)	Comedy
748	Arrival, The (1996)	Action|Sci-Fi|Thriller
749	Man from Down Under, The (1943)	Drama
750	Dr. Strangelove or: How I Learned to Stop Worrying and Love the Bomb (1964)	Comedy|War
751	Careful (1992)	Comedy|Horror
752	Vermont Is For Lovers (1992)	Comedy|Documentary|Romance
753	Month by the Lake, A (1995)	Comedy|Drama|Romance
754	Gold Diggers: The Secret of Bear Mountain (1995)	Adventure|Children
755	Kim (1950)	Children|Drama
756	Carmen Miranda: Bananas Is My Business (1994)	Documentary
757	Ashes of Time (Dung che sai duk) (1994)	Drama
758	Jar, The (Khomreh) (1992)	Drama
759	Maya Lin: A Strong Clear Vision (1994)	Documentary
760	Stalingrad (1993)	Drama|War
761	Phantom, The (1996)	Action|Adventure
762	Striptease (1996)	Comedy|Crime
763	Last of the High Kings, The (a.k.a. Summer Fling) (1996)	Comedy|Drama
764	Heavy (1995)	Drama|Romance
765	Jack (1996)	Comedy|Drama
766	I Shot Andy Warhol (1996)	Drama
767	Grass Harp, The (1995)	Comedy|Drama
768	Someone Else's America (1995)	Drama
769	Marlene Dietrich: Shadow and Light (1996)	Documentary
770	Costa Brava (1946)	Drama
771	Life Is Rosy (a.k.a. Life Is Beautiful) (Vie est belle, La) (1987)	Comedy|Drama
772	Quartier Mozart (1992)	Comedy
773	Touki Bouki (1973)	Drama
774	Wend Kuuni (a.k.a. God's Gift) (1982)	Drama
775	Spirits of the Dead (1968)	Horror|Mystery
776	Babyfever (1994)	Comedy|Drama
777	Pharaoh's Army (1995)	War
778	Trainspotting (1996)	Comedy|Crime|Drama
779	'Til There Was You (1997)	Drama|Romance
780	Independence Day (a.k.a. ID4) (1996)	Action|Adventure|Sci-Fi|Thriller
781	Stealing Beauty (1996)	Drama
782	Fan, The (1996)	Drama|Thriller
783	Hunchback of Notre Dame, The (1996)	Animation|Children|Drama|Musical|Romance
784	Cable Guy, The (1996)	Comedy|Thriller
785	Kingpin (1996)	Comedy
786	Eraser (1996)	Action|Drama|Thriller
787	Gate of Heavenly Peace, The (1995)	Documentary
788	Nutty Professor, The (1996)	Comedy|Fantasy|Romance|Sci-Fi
789	I, the Worst of All (Yo, la peor de todas) (1990)	Drama
790	Unforgettable Summer, An (Un été inoubliable) (1994)	Drama
791	Last Klezmer: Leopold Kozlowski, His Life and Music, The (1994)	Documentary
792	Hungarian Fairy Tale, A (Hol volt, hol nem volt) (1987)	Fantasy
793	My Life and Times With Antonin Artaud (En compagnie d'Antonin Artaud) (1993)	Drama
794	Midnight Dancers (Sibak) (1994)	Comedy|Drama
795	Somebody to Love (1994)	Drama
796	Very Natural Thing, A (1974)	Drama
797	Old Lady Who Walked in the Sea, The (Vieille qui marchait dans la mer, La) (1991)	Comedy
798	Daylight (1996)	Action|Adventure|Drama|Thriller
799	Frighteners, The (1996)	Comedy|Horror|Thriller
800	Lone Star (1996)	Drama|Mystery|Western
801	Harriet the Spy (1996)	Children|Comedy
802	Phenomenon (1996)	Drama|Romance
803	Walking and Talking (1996)	Comedy|Drama|Romance
804	She's the One (1996)	Comedy|Romance
805	Time to Kill, A (1996)	Drama|Thriller
806	American Buffalo (1996)	Crime|Drama
807	Rendezvous in Paris (Rendez-vous de Paris, Les) (1995)	Comedy|Romance
808	Alaska (1996)	Adventure|Children
809	Fled (1996)	Action|Adventure
810	Kazaam (1996)	Children|Comedy|Fantasy
812	Magic Hunter (Büvös vadász) (1994)	Drama
813	Larger Than Life (1996)	Comedy
814	Boy Called Hate, A (1995)	Drama
815	Power 98 (1996)	Action|Mystery|Thriller
816	Two Deaths (1995)	Drama
818	Very Brady Sequel, A (1996)	Comedy
819	Stefano Quantestorie (1993)	Comedy|Drama
820	Death in the Garden (Mort en ce jardin, La) (1956)	Drama
821	Crude Oasis, The (1995)	Drama|Romance
822	Hedd Wyn (1992)	Drama|Romance|War
823	Collector, The (La collectionneuse) (1967)	Drama
824	Kaspar Hauser (1993)	Drama|Mystery
825	Regular Guys (Echte Kerle) (1996)	Comedy|Romance
826	Women Robbers (Diebinnen) (1995)	Drama
827	Convent, The (O Convento) (1995)	Drama
828	Adventures of Pinocchio, The (1996)	Adventure|Children
829	Joe's Apartment (1996)	Comedy|Fantasy|Musical
830	First Wives Club, The (1996)	Comedy
831	Stonewall (1995)	Drama
832	Ransom (1996)	Crime|Thriller
833	High School High (1996)	Comedy
834	Phat Beach (1996)	Comedy
835	Foxfire (1996)	Drama
836	Chain Reaction (1996)	Action|Adventure|Thriller
837	Matilda (1996)	Children|Comedy|Fantasy
838	Emma (1996)	Comedy|Drama|Romance
839	Crow: City of Angels, The (1996)	Action|Thriller
840	House Arrest (1996)	Children|Comedy
841	Eyes Without a Face (Yeux sans visage, Les) (1959)	Horror
842	Tales from the Crypt Presents: Bordello of Blood (1996)	Comedy|Horror
843	Lotto Land (1995)	Drama
844	Story of Xinghua, The (Xinghua san yue tian) (1994)	Drama
845	Day the Sun Turned Cold, The (Tianguo niezi) (1994)	Drama
846	Flirt (1995)	Drama
847	Big Squeeze, The (1996)	Comedy|Drama
848	Spitfire Grill, The (1996)	Drama
849	Escape from L.A. (1996)	Action|Adventure|Sci-Fi|Thriller
850	Cyclo (Xich lo) (1995)	Crime|Drama
851	Basquiat (1996)	Drama
852	Tin Cup (1996)	Comedy|Drama|Romance
853	Dingo (1991)	Drama
854	Ballad of Narayama, The (Narayama Bushiko) (1958)	Drama
855	Every Other Weekend (Un week-end sur deux) (1990)	Drama
856	Mille bolle blu (1993)	Comedy
857	Crows and Sparrows (Wuya yu maque) (1949)	Drama
858	Godfather, The (1972)	Crime|Drama
859	Hippie Revolution, The (1996)	Documentary
860	Maybe, Maybe Not (Bewegte Mann, Der) (1994)	Comedy
861	Supercop (Police Story 3: Supercop) (Jing cha gu shi III: Chao ji jing cha) (1992)	Action|Comedy|Crime|Thriller
862	Manny & Lo (1996)	Drama
864	Wife, The (1995)	Comedy|Drama
865	Small Faces (1996)	Drama
866	Bound (1996)	Crime|Drama|Romance|Thriller
867	Carpool (1996)	Comedy|Crime
868	Death in Brunswick (1991)	Comedy
869	Kansas City (1996)	Crime|Drama|Musical|Thriller
870	Gone Fishin' (1997)	Comedy
871	Lover's Knot (1996)	Comedy
872	Vive L'Amour (Ai qing wan sui) (1994)	Drama
873	Shadow of Angels (Schatten der Engel) (1976)	Drama
874	Killer: A Journal of Murder (1995)	Crime|Drama
875	Nothing to Lose (1994)	Action|Crime|Drama
876	Supercop 2 (Project S) (Chao ji ji hua) (1993)	Action|Comedy|Crime|Thriller
877	Girls Town (1996)	Comedy|Drama
878	Bye-Bye (1995)	Drama
879	Relic, The (1997)	Horror|Thriller
880	Island of Dr. Moreau, The (1996)	Sci-Fi|Thriller
881	First Kid (1996)	Children|Comedy
882	Trigger Effect, The (1996)	Drama|Thriller
884	Sweet Nothing (1996)	Drama
885	Bogus (1996)	Children|Drama|Fantasy
886	Bulletproof (1996)	Action|Comedy|Crime
887	Talk of Angels (1998)	Drama
888	Land Before Time III: The Time of the Great Giving (1995)	Adventure|Animation|Children|Musical
889	1-900 (06) (1994)	Drama|Romance
890	Baton Rouge (Bâton rouge) (1988)	Thriller
891	Halloween: The Curse of Michael Myers (Halloween 6: The Curse of Michael Myers) (1995)	Horror|Thriller
892	Twelfth Night (1996)	Comedy|Drama|Romance
893	Mother Night (1996)	Drama
894	Liebelei (1933)	Romance
895	Venice/Venice (1992)	Drama
896	Wild Reeds (Les roseaux sauvages) (1994)	Drama
897	For Whom the Bell Tolls (1943)	Adventure|Drama|Romance|War
898	Philadelphia Story, The (1940)	Comedy|Drama|Romance
899	Singin' in the Rain (1952)	Comedy|Musical|Romance
900	American in Paris, An (1951)	Musical|Romance
901	Funny Face (1957)	Comedy|Musical
902	Breakfast at Tiffany's (1961)	Drama|Romance
903	Vertigo (1958)	Drama|Mystery|Romance|Thriller
904	Rear Window (1954)	Mystery|Thriller
905	It Happened One Night (1934)	Comedy|Romance
906	Gaslight (1944)	Drama|Thriller
907	Gay Divorcee, The (1934)	Comedy|Musical|Romance
908	North by Northwest (1959)	Action|Adventure|Mystery|Romance|Thriller
909	Apartment, The (1960)	Comedy|Drama|Romance
910	Some Like It Hot (1959)	Comedy|Crime
911	Charade (1963)	Comedy|Crime|Mystery|Romance|Thriller
912	Casablanca (1942)	Drama|Romance
913	Maltese Falcon, The (1941)	Film-Noir|Mystery
914	My Fair Lady (1964)	Comedy|Drama|Musical|Romance
915	Sabrina (1954)	Comedy|Romance
916	Roman Holiday (1953)	Comedy|Drama|Romance
917	Little Princess, The (1939)	Children|Drama
918	Meet Me in St. Louis (1944)	Musical
919	Wizard of Oz, The (1939)	Adventure|Children|Fantasy|Musical
920	Gone with the Wind (1939)	Drama|Romance|War
921	My Favorite Year (1982)	Comedy
922	Sunset Blvd. (a.k.a. Sunset Boulevard) (1950)	Drama|Film-Noir|Romance
923	Citizen Kane (1941)	Drama|Mystery
924	2001: A Space Odyssey (1968)	Adventure|Drama|Sci-Fi
925	Golden Earrings (1947)	Adventure|Romance|War
926	All About Eve (1950)	Drama
927	Women, The (1939)	Comedy
928	Rebecca (1940)	Drama|Mystery|Romance|Thriller
929	Foreign Correspondent (1940)	Drama|Film-Noir|Mystery|Thriller
930	Notorious (1946)	Film-Noir|Romance|Thriller
931	Spellbound (1945)	Mystery|Romance|Thriller
932	Affair to Remember, An (1957)	Drama|Romance
933	To Catch a Thief (1955)	Crime|Mystery|Romance|Thriller
934	Father of the Bride (1950)	Comedy
935	Band Wagon, The (1953)	Comedy|Musical
936	Ninotchka (1939)	Comedy|Romance
937	Love in the Afternoon (1957)	Comedy|Romance
938	Gigi (1958)	Musical
939	Reluctant Debutante, The (1958)	Comedy|Drama
940	Adventures of Robin Hood, The (1938)	Action|Adventure|Romance
941	Mark of Zorro, The (1940)	Adventure
942	Laura (1944)	Crime|Film-Noir|Mystery
943	Ghost and Mrs. Muir, The (1947)	Drama|Fantasy|Romance
944	Lost Horizon (1937)	Drama
945	Top Hat (1935)	Comedy|Musical|Romance
946	To Be or Not to Be (1942)	Comedy|Drama|War
947	My Man Godfrey (1936)	Comedy|Romance
948	Giant (1956)	Drama|Romance|Western
949	East of Eden (1955)	Drama
950	Thin Man, The (1934)	Comedy|Crime
951	His Girl Friday (1940)	Comedy|Romance
952	Around the World in 80 Days (1956)	Adventure|Comedy
953	It's a Wonderful Life (1946)	Drama|Fantasy|Romance
954	Mr. Smith Goes to Washington (1939)	Drama
955	Bringing Up Baby (1938)	Comedy|Romance
956	Penny Serenade (1941)	Drama|Romance
957	Scarlet Letter, The (1926)	Drama
958	Lady of Burlesque (1943)	Comedy|Mystery
959	Of Human Bondage (1934)	Drama
960	Angel on My Shoulder (1946)	Crime|Drama
961	Little Lord Fauntleroy (1936)	Drama
962	They Made Me a Criminal (I Became a Criminal) (They Made Me a Fugitive) (1939)	Crime|Drama
963	Inspector General, The (1949)	Musical
964	Angel and the Badman (1947)	Romance|Western
965	39 Steps, The (1935)	Drama|Mystery|Thriller
966	Walk in the Sun, A (1945)	War
967	Outlaw, The (1943)	Western
968	Night of the Living Dead (1968)	Horror|Sci-Fi|Thriller
969	African Queen, The (1951)	Adventure|Comedy|Romance|War
970	Beat the Devil (1953)	Adventure|Comedy|Crime|Drama|Romance
971	Cat on a Hot Tin Roof (1958)	Drama
972	Last Time I Saw Paris, The (1954)	Drama
973	Meet John Doe (1941)	Comedy|Drama
974	Algiers (1938)	Drama|Romance
975	Something to Sing About (1937)	Comedy|Musical
976	Farewell to Arms, A (1932)	Romance|War
977	Moonlight Murder (1936)	Mystery
979	Nothing Personal (1995)	Drama|War
980	Yes, Madam (a.k.a. Police Assassins) (a.k.a. In the Line of Duty 2) (Huang gu shi jie) (1985)	Action
981	Dangerous Ground (1997)	Drama
982	Picnic (1955)	Drama
983	Madagascar Skin (1995)	Romance
984	Pompatus of Love, The (1996)	Comedy|Drama
985	Small Wonders (1995)	Documentary
986	Fly Away Home (1996)	Adventure|Children
987	Bliss (1997)	Drama|Romance
988	Grace of My Heart (1996)	Comedy|Drama
989	Brother of Sleep (Schlafes Bruder) (1995)	Drama
990	Maximum Risk (1996)	Action|Adventure|Thriller
991	Michael Collins (1996)	Drama
992	Rich Man's Wife, The (1996)	Thriller
993	Infinity (1996)	Drama
994	Big Night (1996)	Comedy|Drama
996	Last Man Standing (1996)	Action|Crime|Drama|Thriller
997	Caught (1996)	Drama|Thriller
998	Set It Off (1996)	Action|Crime
999	2 Days in the Valley (1996)	Crime|Film-Noir
1000	Curdled (1996)	Crime
1001	Associate, The (Associé, L') (1979)	Comedy
1002	Ed's Next Move (1996)	Comedy|Romance
1003	Extreme Measures (1996)	Drama|Thriller
1004	Glimmer Man, The (1996)	Action|Thriller
1005	D3: The Mighty Ducks (1996)	Children|Comedy
1006	Chamber, The (1996)	Drama
1007	Apple Dumpling Gang, The (1975)	Children|Comedy|Western
1008	Davy Crockett, King of the Wild Frontier (1955)	Adventure|Western
1009	Escape to Witch Mountain (1975)	Adventure|Children|Fantasy
1010	Love Bug, The (1969)	Children|Comedy
1011	Herbie Rides Again (1974)	Adventure|Children|Comedy
1012	Old Yeller (1957)	Children|Drama
1013	Parent Trap, The (1961)	Children|Comedy|Romance
1014	Pollyanna (1960)	Children|Comedy|Drama
1015	Homeward Bound: The Incredible Journey (1993)	Adventure|Children|Drama
1016	Shaggy Dog, The (1959)	Children|Comedy
1017	Swiss Family Robinson (1960)	Adventure|Children
1018	That Darn Cat! (1965)	Children|Comedy|Mystery
1019	20,000 Leagues Under the Sea (1954)	Adventure|Drama|Sci-Fi
1020	Cool Runnings (1993)	Comedy
1021	Angels in the Outfield (1994)	Children|Comedy
1022	Cinderella (1950)	Animation|Children|Fantasy|Musical|Romance
1023	Winnie the Pooh and the Blustery Day (1968)	Animation|Children|Musical
1024	Three Caballeros, The (1945)	Animation|Children|Musical
1025	Sword in the Stone, The (1963)	Animation|Children|Fantasy|Musical
1026	So Dear to My Heart (1949)	Children|Drama
1027	Robin Hood: Prince of Thieves (1991)	Adventure|Drama
1028	Mary Poppins (1964)	Children|Comedy|Fantasy|Musical
1029	Dumbo (1941)	Animation|Children|Drama|Musical
1030	Pete's Dragon (1977)	Adventure|Animation|Children|Musical
1031	Bedknobs and Broomsticks (1971)	Adventure|Children|Musical
1032	Alice in Wonderland (1951)	Adventure|Animation|Children|Fantasy|Musical
1033	Fox and the Hound, The (1981)	Animation|Children|Drama
1034	Freeway (1996)	Comedy|Crime|Drama|Thriller
1035	Sound of Music, The (1965)	Musical|Romance
1036	Die Hard (1988)	Action|Crime|Thriller
1037	Lawnmower Man, The (1992)	Action|Horror|Sci-Fi|Thriller
1038	Unhook the Stars (1996)	Drama
1039	Synthetic Pleasures (1995)	Documentary
1040	Secret Agent, The (1996)	Drama
1041	Secrets & Lies (1996)	Drama
1042	That Thing You Do! (1996)	Comedy|Drama
1043	To Gillian on Her 37th Birthday (1996)	Drama|Romance
1044	Surviving Picasso (1996)	Drama
1045	Love Is All There Is (1996)	Comedy|Drama
1046	Beautiful Thing (1996)	Drama|Romance
1047	Long Kiss Goodnight, The (1996)	Action|Drama|Thriller
1049	Ghost and the Darkness, The (1996)	Action|Adventure
1050	Looking for Richard (1996)	Documentary|Drama
1051	Trees Lounge (1996)	Drama
1052	Proprietor, The (1996)	Drama
1053	Normal Life (1996)	Crime|Drama|Romance
1054	Get on the Bus (1996)	Drama
1055	Shadow Conspiracy (1997)	Thriller
1056	Jude (1996)	Drama
1057	Everyone Says I Love You (1996)	Comedy|Musical|Romance
1058	Bitter Sugar (Azúcar amarga) (1996)	Drama
1059	William Shakespeare's Romeo + Juliet (1996)	Drama|Romance
1060	Swingers (1996)	Comedy|Drama
1061	Sleepers (1996)	Thriller
1062	Sunchaser, The (1996)	Drama
1063	Johns (1996)	Drama
1064	Aladdin and the King of Thieves (1996)	Animation|Children|Comedy|Fantasy|Musical|Romance
1065	Five Angles on Murder (1950)	Mystery
1066	Shall We Dance (1937)	Comedy|Musical|Romance
1067	Damsel in Distress, A (1937)	Comedy|Musical|Romance
1068	Crossfire (1947)	Crime|Film-Noir
1069	Murder, My Sweet (1944)	Crime|Film-Noir|Thriller
1070	Macao (1952)	Adventure
1071	For the Moment (1994)	Romance|War
1073	Willy Wonka & the Chocolate Factory (1971)	Children|Comedy|Fantasy|Musical
1075	Sexual Life of the Belgians, The (Vie sexuelle des Belges 1950-1978, La) (1994)	Comedy|Romance
1076	Innocents, The (1961)	Drama|Horror|Thriller
1077	Sleeper (1973)	Comedy|Sci-Fi
1078	Bananas (1971)	Comedy|War
1079	Fish Called Wanda, A (1988)	Comedy|Crime
1080	Monty Python's Life of Brian (1979)	Comedy
1081	Victor/Victoria (1982)	Comedy|Musical|Romance
1082	Candidate, The (1972)	Drama
1083	Great Race, The (1965)	Comedy|Musical
1084	Bonnie and Clyde (1967)	Crime|Drama
1085	Old Man and the Sea, The (1958)	Adventure|Drama
1086	Dial M for Murder (1954)	Crime|Mystery|Thriller
1087	Madame Butterfly (1995)	Musical
1088	Dirty Dancing (1987)	Drama|Musical|Romance
1089	Reservoir Dogs (1992)	Crime|Mystery|Thriller
1090	Platoon (1986)	Drama|War
1091	Weekend at Bernie's (1989)	Comedy
1092	Basic Instinct (1992)	Crime|Mystery|Thriller
1093	Doors, The (1991)	Drama
1094	Crying Game, The (1992)	Drama|Romance|Thriller
1095	Glengarry Glen Ross (1992)	Drama
1096	Sophie's Choice (1982)	Drama
1097	E.T. the Extra-Terrestrial (1982)	Children|Drama|Sci-Fi
1098	Search for One-eye Jimmy, The (1996)	Comedy
1099	Christmas Carol, A (1938)	Children|Drama|Fantasy
1100	Days of Thunder (1990)	Action|Drama|Romance
1101	Top Gun (1986)	Action|Romance
1102	American Strays (1996)	Action
1103	Rebel Without a Cause (1955)	Drama
1104	Streetcar Named Desire, A (1951)	Drama
1105	Children of the Corn IV: The Gathering (1996)	Horror
1106	Leopard Son, The (1996)	Documentary
1107	Loser (1991)	Comedy
1109	Charm's Incidents (Charms Zwischenfälle) (1996)	Drama
1110	Bird of Prey (1996)	Action
1111	Microcosmos (Microcosmos: Le peuple de l'herbe) (1996)	Documentary
1112	Palookaville (1996)	Action|Comedy|Drama
1113	Associate, The (1996)	Comedy
1114	Funeral, The (1996)	Crime|Drama
1115	Sleepover (1995)	Drama
1116	Single Girl, A (Fille seule, La) (1995)	Drama
1117	Eighth Day, The (Huitième jour, Le) (1996)	Drama
1118	North Star (a.k.a. Tashunga) (1995)	Action|Adventure|Crime|Drama|Western
1119	Drunks (1995)	Drama
1120	People vs. Larry Flynt, The (1996)	Comedy|Drama
1121	Glory Daze (1995)	Drama
1122	Plutonium Circus (1995)	Documentary
1123	Perfect Candidate, A (1996)	Documentary
1124	On Golden Pond (1981)	Drama
1125	Return of the Pink Panther, The (1975)	Comedy|Crime
1126	Drop Dead Fred (1991)	Comedy|Fantasy
1127	Abyss, The (1989)	Action|Adventure|Sci-Fi|Thriller
1128	Fog, The (1980)	Horror
1129	Escape from New York (1981)	Action|Adventure|Sci-Fi|Thriller
1130	Howling, The (1980)	Horror|Mystery
1131	Jean de Florette (1986)	Drama|Mystery
1132	Manon of the Spring (Manon des sources) (1986)	Drama
1133	Talking About Sex (1994)	Comedy|Drama
1134	Johnny 100 Pesos (Johnny cien pesos) (1993)	Action|Drama
1135	Private Benjamin (1980)	Comedy
1136	Monty Python and the Holy Grail (1975)	Adventure|Comedy|Fantasy
1137	Hustler White (1996)	Romance
1138	Dadetown (1995)	Drama
1139	Everything Relative (1996)	Drama
1140	Entertaining Angels: The Dorothy Day Story (1996)	Drama
1141	Last Call (Hoogste tijd) (1995)	Drama
1142	Get Over It (1996)	Drama
1143	Three Lives and Only One Death (Trois vies & une seule mort) (1996)	Comedy
1144	Line King: The Al Hirschfeld Story, The (1996)	Documentary
1145	Snowriders (1996)	Documentary
1146	Curtis's Charm (1995)	Comedy|Drama
1147	When We Were Kings (1996)	Documentary
1148	Wallace & Gromit: The Wrong Trousers (1993)	Animation|Children|Comedy|Crime
1149	JLG/JLG (JLG/JLG - autoportrait de décembre) (1994)	Documentary|Drama
1150	Return of Martin Guerre, The (Retour de Martin Guerre, Le) (1982)	Drama
1151	Faust (1994)	Animation|Comedy|Thriller
1152	He Walked by Night (1948)	Crime|Film-Noir|Thriller
1153	Raw Deal (1948)	Film-Noir
1154	T-Men (1947)	Film-Noir
1155	Invitation, The (Zaproszenie) (1986)	Drama
1156	Children Are Watching Us, The (Bambini ci guardano, I) (1944)	Drama
1157	Symphonie pastorale, La (1946)	Drama
1158	Here Comes Cookie (1935)	Comedy
1159	Love in Bloom (1935)	Romance
1160	Six of a Kind (1934)	Comedy
1161	Tin Drum, The (Blechtrommel, Die) (1979)	Drama|War
1162	Ruling Class, The (1972)	Comedy|Drama
1163	Mina Tannenbaum (1994)	Drama
1164	2 ou 3 choses que je sais d'elle (2 or 3 Things I Know About Her) (1967)	Drama
1165	Bloody Child, The (1996)	Drama|Thriller
1166	Farmer & Chase (1997)	Comedy
1167	Dear God (1996)	Comedy
1168	Bad Moon (1996)	Action|Adventure|Horror
1169	American Dream (1990)	Documentary
1170	Best of the Best 3: No Turning Back (1995)	Action
1171	Bob Roberts (1992)	Comedy
1172	Cinema Paradiso (Nuovo cinema Paradiso) (1989)	Drama
1173	Cook the Thief His Wife & Her Lover, The (1989)	Comedy|Drama
1174	Dead Tired (Grosse Fatigue) (1994)	Comedy
1175	Delicatessen (1991)	Comedy|Drama|Romance
1176	Double Life of Veronique, The (Double Vie de Véronique, La) (1991)	Drama|Fantasy|Romance
1177	Enchanted April (1992)	Drama|Romance
1178	Paths of Glory (1957)	Drama|War
1179	Grifters, The (1990)	Crime|Drama|Film-Noir
1180	Hear My Song (1991)	Comedy
1181	Shooter, The (1997)	Western
1183	English Patient, The (1996)	Drama|Romance|War
1184	Mediterraneo (1991)	Comedy|Drama
1185	My Left Foot (1989)	Drama
1186	Sex, Lies, and Videotape (1989)	Drama
1187	Passion Fish (1992)	Drama
1188	Strictly Ballroom (1992)	Comedy|Romance
1189	Thin Blue Line, The (1988)	Documentary
1190	Tie Me Up! Tie Me Down! (¡Átame!) (1990)	Crime|Drama|Romance
1191	Madonna: Truth or Dare (1991)	Documentary|Musical
1192	Paris Is Burning (1990)	Documentary
1193	One Flew Over the Cuckoo's Nest (1975)	Drama
1194	Cheech and Chong's Up in Smoke (1978)	Comedy
1196	Star Wars: Episode V - The Empire Strikes Back (1980)	Action|Adventure|Sci-Fi
1197	Princess Bride, The (1987)	Action|Adventure|Comedy|Fantasy|Romance
1198	Raiders of the Lost Ark (Indiana Jones and the Raiders of the Lost Ark) (1981)	Action|Adventure
1199	Brazil (1985)	Fantasy|Sci-Fi
1200	Aliens (1986)	Action|Adventure|Horror|Sci-Fi
1201	Good, the Bad and the Ugly, The (Buono, il brutto, il cattivo, Il) (1966)	Action|Adventure|Western
1202	Withnail & I (1987)	Comedy
1203	12 Angry Men (1957)	Drama
1204	Lawrence of Arabia (1962)	Adventure|Drama|War
1206	Clockwork Orange, A (1971)	Crime|Drama|Sci-Fi|Thriller
1207	To Kill a Mockingbird (1962)	Drama
1208	Apocalypse Now (1979)	Action|Drama|War
1209	Once Upon a Time in the West (C'era una volta il West) (1968)	Action|Drama|Western
1210	Star Wars: Episode VI - Return of the Jedi (1983)	Action|Adventure|Sci-Fi
1211	Wings of Desire (Himmel über Berlin, Der) (1987)	Drama|Fantasy|Romance
1212	Third Man, The (1949)	Film-Noir|Mystery|Thriller
1213	Goodfellas (1990)	Crime|Drama
1214	Alien (1979)	Horror|Sci-Fi
1215	Army of Darkness (1993)	Action|Adventure|Comedy|Fantasy|Horror
1216	Big Blue, The (Grand bleu, Le) (1988)	Adventure|Drama|Romance
1217	Ran (1985)	Drama|War
1218	Killer, The (Die xue shuang xiong) (1989)	Action|Crime|Drama|Thriller
1219	Psycho (1960)	Crime|Horror
1220	Blues Brothers, The (1980)	Action|Comedy|Musical
1221	Godfather: Part II, The (1974)	Crime|Drama
1222	Full Metal Jacket (1987)	Drama|War
1223	Grand Day Out with Wallace and Gromit, A (1989)	Adventure|Animation|Children|Comedy|Sci-Fi
1224	Henry V (1989)	Action|Drama|Romance|War
1225	Amadeus (1984)	Drama
1226	Quiet Man, The (1952)	Drama|Romance
1227	Once Upon a Time in America (1984)	Crime|Drama
1228	Raging Bull (1980)	Drama
1230	Annie Hall (1977)	Comedy|Romance
1231	Right Stuff, The (1983)	Drama
1232	Stalker (1979)	Drama|Mystery|Sci-Fi
1233	Boot, Das (Boat, The) (1981)	Action|Drama|War
1234	Sting, The (1973)	Comedy|Crime
1235	Harold and Maude (1971)	Comedy|Drama|Romance
1236	Trust (1990)	Comedy|Drama|Romance
1237	Seventh Seal, The (Sjunde inseglet, Det) (1957)	Drama
1238	Local Hero (1983)	Comedy
1240	Terminator, The (1984)	Action|Sci-Fi|Thriller
1241	Dead Alive (Braindead) (1992)	Comedy|Fantasy|Horror
1242	Glory (1989)	Drama|War
1243	Rosencrantz and Guildenstern Are Dead (1990)	Comedy|Drama
1244	Manhattan (1979)	Comedy|Drama|Romance
1245	Miller's Crossing (1990)	Crime|Drama|Film-Noir|Thriller
1246	Dead Poets Society (1989)	Drama
1247	Graduate, The (1967)	Comedy|Drama|Romance
1248	Touch of Evil (1958)	Crime|Film-Noir|Thriller
1249	Femme Nikita, La (Nikita) (1990)	Action|Crime|Romance|Thriller
1250	Bridge on the River Kwai, The (1957)	Adventure|Drama|War
1251	8 1/2 (8½) (1963)	Drama|Fantasy
1252	Chinatown (1974)	Crime|Film-Noir|Mystery|Thriller
1253	Day the Earth Stood Still, The (1951)	Drama|Sci-Fi|Thriller
1254	Treasure of the Sierra Madre, The (1948)	Action|Adventure|Drama|Western
1255	Bad Taste (1987)	Comedy|Horror|Sci-Fi
1256	Duck Soup (1933)	Comedy|Musical|War
1257	Better Off Dead... (1985)	Comedy|Romance
1258	Shining, The (1980)	Horror
1259	Stand by Me (1986)	Adventure|Drama
1260	M (1931)	Crime|Film-Noir|Thriller
1261	Evil Dead II (Dead by Dawn) (1987)	Action|Comedy|Fantasy|Horror
1262	Great Escape, The (1963)	Action|Adventure|Drama|War
1263	Deer Hunter, The (1978)	Drama|War
1264	Diva (1981)	Action|Drama|Mystery|Romance|Thriller
1265	Groundhog Day (1993)	Comedy|Fantasy|Romance
1266	Unforgiven (1992)	Drama|Western
1267	Manchurian Candidate, The (1962)	Crime|Thriller|War
1268	Pump Up the Volume (1990)	Comedy|Drama
1269	Arsenic and Old Lace (1944)	Comedy|Mystery|Thriller
1270	Back to the Future (1985)	Adventure|Comedy|Sci-Fi
1271	Fried Green Tomatoes (1991)	Comedy|Crime|Drama
1272	Patton (1970)	Drama|War
1273	Down by Law (1986)	Comedy|Drama|Film-Noir
1274	Akira (1988)	Action|Adventure|Animation|Sci-Fi
1275	Highlander (1986)	Action|Adventure|Fantasy
1276	Cool Hand Luke (1967)	Drama
1277	Cyrano de Bergerac (1990)	Comedy|Drama|Romance
1278	Young Frankenstein (1974)	Comedy|Fantasy
1279	Night on Earth (1991)	Comedy|Drama
1280	Raise the Red Lantern (Da hong deng long gao gao gua) (1991)	Drama
1281	Great Dictator, The (1940)	Comedy|Drama|War
1282	Fantasia (1940)	Animation|Children|Fantasy|Musical
1283	High Noon (1952)	Drama|Western
1284	Big Sleep, The (1946)	Crime|Film-Noir|Mystery
1285	Heathers (1989)	Comedy
1286	Somewhere in Time (1980)	Drama|Romance
1287	Ben-Hur (1959)	Action|Adventure|Drama
1288	This Is Spinal Tap (1984)	Comedy
1289	Koyaanisqatsi (a.k.a. Koyaanisqatsi: Life Out of Balance) (1983)	Documentary
1290	Some Kind of Wonderful (1987)	Drama|Romance
1291	Indiana Jones and the Last Crusade (1989)	Action|Adventure
1292	Being There (1979)	Comedy|Drama
1293	Gandhi (1982)	Drama
1295	Unbearable Lightness of Being, The (1988)	Drama
1296	Room with a View, A (1986)	Drama|Romance
1297	Real Genius (1985)	Comedy
1298	Pink Floyd: The Wall (1982)	Drama|Musical
1299	Killing Fields, The (1984)	Drama|War
1300	My Life as a Dog (Mitt liv som hund) (1985)	Comedy|Drama
1301	Forbidden Planet (1956)	Drama|Sci-Fi
1302	Field of Dreams (1989)	Children|Drama|Fantasy
1303	Man Who Would Be King, The (1975)	Adventure|Drama
1304	Butch Cassidy and the Sundance Kid (1969)	Action|Western
1305	Paris, Texas (1984)	Drama|Romance
1306	Until the End of the World (Bis ans Ende der Welt) (1991)	Adventure|Drama|Sci-Fi
1307	When Harry Met Sally... (1989)	Comedy|Romance
1308	I Shot a Man in Vegas (1995)	Comedy
1309	Parallel Sons (1995)	Drama|Romance
1310	Hype! (1996)	Documentary
1311	Santa with Muscles (1996)	Comedy
1312	Female Perversions (1996)	Drama
1313	Mad Dog Time (1996)	Crime
1314	Breathing Room (1996)	Romance
1315	Paris Was a Woman (1995)	Documentary
1316	Anna (1996)	Drama
1317	I'm Not Rappaport (1996)	Comedy
1318	Blue Juice (1995)	Comedy|Drama
1319	Kids of Survival (1996)	Documentary
1320	Alien³ (a.k.a. Alien 3) (1992)	Action|Horror|Sci-Fi|Thriller
1321	American Werewolf in London, An (1981)	Comedy|Horror|Thriller
1322	Amityville 1992: It's About Time (1992)	Horror
1323	Amityville 3-D (1983)	Horror
1324	Amityville: Dollhouse (1996)	Horror
1325	Amityville: A New Generation (1993)	Horror
1326	Amityville II: The Possession (1982)	Horror
1327	Amityville Horror, The (1979)	Drama|Horror|Mystery|Thriller
1328	Amityville Curse, The (1990)	Horror
1329	Blood for Dracula (Andy Warhol's Dracula) (1974)	Horror
1330	April Fool's Day (1986)	Horror
1331	Audrey Rose (1977)	Horror
1332	Believers, The (1987)	Horror|Thriller
1333	Birds, The (1963)	Horror|Thriller
1334	Blob, The (1958)	Horror|Sci-Fi
1335	Blood Beach (1981)	Horror|Mystery
1336	Body Parts (1991)	Horror|Thriller
1337	Body Snatcher, The (1945)	Drama|Horror|Thriller
1339	Dracula (Bram Stoker's Dracula) (1992)	Fantasy|Horror|Romance|Thriller
1340	Bride of Frankenstein, The (Bride of Frankenstein) (1935)	Drama|Horror|Sci-Fi
1341	Burnt Offerings (1976)	Horror
1342	Candyman (1992)	Horror|Thriller
1343	Cape Fear (1991)	Thriller
1344	Cape Fear (1962)	Crime|Drama|Thriller
1345	Carrie (1976)	Drama|Fantasy|Horror|Thriller
1346	Cat People (1982)	Drama|Fantasy|Horror
1347	Nightmare on Elm Street, A (1984)	Horror|Thriller
1348	Nosferatu (Nosferatu, eine Symphonie des Grauens) (1922)	Horror
1349	Vampire in Venice (Nosferatu a Venezia) (Nosferatu in Venice) (1986)	Horror
1350	Omen, The (1976)	Horror|Mystery|Thriller
1351	Blood and Wine (Blood & Wine) (1996)	Crime|Drama|Thriller
1352	Albino Alligator (1996)	Crime|Thriller
1353	Mirror Has Two Faces, The (1996)	Comedy|Drama|Romance
1354	Breaking the Waves (1996)	Drama|Mystery
1355	Nightwatch (1997)	Horror|Thriller
1356	Star Trek: First Contact (1996)	Action|Adventure|Sci-Fi|Thriller
1357	Shine (1996)	Drama|Romance
1358	Sling Blade (1996)	Drama
1359	Jingle All the Way (1996)	Children|Comedy
1360	Identification of a Woman (Identificazione di una donna) (1982)	Drama
1361	Paradise Lost: The Child Murders at Robin Hood Hills (1996)	Documentary
1363	Preacher's Wife, The (1996)	Drama
1364	Zero Kelvin (Kjærlighetens kjøtere) (1995)	Drama
1365	Ridicule (1996)	Drama
1366	Crucible, The (1996)	Drama
1367	101 Dalmatians (1996)	Adventure|Children|Comedy
1368	Forbidden Christ, The (Cristo proibito, Il) (1950)	Drama
1369	I Can't Sleep (J'ai pas sommeil) (1994)	Drama|Thriller
1370	Die Hard 2 (1990)	Action|Adventure|Thriller
1371	Star Trek: The Motion Picture (1979)	Adventure|Sci-Fi
1372	Star Trek VI: The Undiscovered Country (1991)	Action|Mystery|Sci-Fi
1373	Star Trek V: The Final Frontier (1989)	Action|Sci-Fi
1374	Star Trek II: The Wrath of Khan (1982)	Action|Adventure|Sci-Fi|Thriller
1375	Star Trek III: The Search for Spock (1984)	Action|Adventure|Sci-Fi
1376	Star Trek IV: The Voyage Home (1986)	Adventure|Comedy|Sci-Fi
1377	Batman Returns (1992)	Action|Crime
1378	Young Guns (1988)	Action|Comedy|Western
1379	Young Guns II (1990)	Action|Western
1380	Grease (1978)	Comedy|Musical|Romance
1381	Grease 2 (1982)	Comedy|Musical|Romance
1382	Marked for Death (1990)	Action|Drama
1383	Adrenalin: Fear the Rush (1996)	Action|Sci-Fi
1384	Substance of Fire, The (1996)	Drama
1385	Under Siege (1992)	Action|Drama|Thriller
1386	Terror in a Texas Town (1958)	Western
1387	Jaws (1975)	Action|Horror
1388	Jaws 2 (1978)	Horror|Thriller
1389	Jaws 3-D (1983)	Action|Horror
1390	My Fellow Americans (1996)	Comedy
1391	Mars Attacks! (1996)	Action|Comedy|Sci-Fi
1392	Citizen Ruth (1996)	Comedy|Drama
1393	Jerry Maguire (1996)	Drama|Romance
1394	Raising Arizona (1987)	Comedy
1395	Tin Men (1987)	Comedy|Drama
1396	Sneakers (1992)	Action|Comedy|Crime|Drama|Sci-Fi
1397	Bastard Out of Carolina (1996)	Drama
1398	In Love and War (1996)	Romance|War
1399	Marvin's Room (1996)	Drama
1400	Somebody is Waiting (1996)	Drama
1401	Ghosts of Mississippi (1996)	Drama
1404	Night Falls on Manhattan (1996)	Crime|Drama
1405	Beavis and Butt-Head Do America (1996)	Adventure|Animation|Comedy|Crime
1406	Judgement in Stone, A (Cérémonie, La) (1995)	Drama
1407	Scream (1996)	Comedy|Horror|Mystery|Thriller
1408	Last of the Mohicans, The (1992)	Action|Romance|War|Western
1409	Michael (1996)	Comedy|Drama|Fantasy|Romance
1410	Evening Star, The (1996)	Comedy|Drama
1411	Hamlet (1996)	Crime|Drama|Romance
1412	Some Mother's Son (1996)	Drama
1413	Whole Wide World, The (1996)	Drama
1414	Mother (1996)	Comedy
1415	Thieves (Voleurs, Les) (1996)	Crime|Drama|Romance
1416	Evita (1996)	Drama|Musical
1417	Portrait of a Lady, The (1996)	Drama
1419	Walkabout (1971)	Adventure|Drama
1420	Message to Love: The Isle of Wight Festival (1996)	Documentary
1421	Grateful Dead (1995)	Documentary
1422	Murder at 1600 (1997)	Crime|Drama|Mystery|Thriller
1423	Hearts and Minds (1996)	Drama
1424	Inside (1996)	Action
1425	Fierce Creatures (1997)	Comedy
1426	Zeus and Roxanne (1997)	Children
1427	Turbulence (1997)	Action|Thriller
1428	Angel Baby (1995)	Drama
1429	First Strike (Police Story 4: First Strike) (Ging chaat goo si 4: Ji gaan daan yam mo) (1996)	Action|Adventure|Comedy|Thriller
1430	Underworld (1996)	Comedy|Thriller
1431	Beverly Hills Ninja (1997)	Action|Comedy
1432	Metro (1997)	Action|Comedy|Crime|Drama|Thriller
1433	Machine, The (1994)	Comedy|Horror|Sci-Fi|Thriller
1434	Stranger, The (1994)	Action
1436	Falling in Love Again (1980)	Comedy
1437	Cement Garden, The (1993)	Drama
1438	Dante's Peak (1997)	Action|Thriller
1439	Meet Wally Sparks (1997)	Comedy
1440	Amos & Andrew (1993)	Comedy
1441	Benny & Joon (1993)	Comedy|Romance
1442	Prefontaine (1997)	Drama
1443	Tickle in the Heart, A (1996)	Documentary
1444	Guantanamera (1994)	Comedy
1445	McHale's Navy (1997)	Comedy|War
1446	Kolya (Kolja) (1996)	Comedy|Drama
1447	Gridlock'd (1997)	Crime
1448	Fire on the Mountain (1996)	Documentary
1449	Waiting for Guffman (1996)	Comedy
1450	Prisoner of the Mountains (Kavkazsky plennik) (1996)	War
1453	Beautician and the Beast, The (1997)	Comedy|Romance
1454	SubUrbia (1997)	Comedy|Drama
1455	Hotel de Love (1996)	Comedy|Romance
1456	Pest, The (1997)	Comedy
1457	Fools Rush In (1997)	Comedy|Drama|Romance
1458	Touch (1997)	Drama|Fantasy|Romance
1459	Absolute Power (1997)	Mystery|Thriller
1460	That Darn Cat (1997)	Children|Comedy|Mystery
1461	Vegas Vacation (National Lampoon's Las Vegas Vacation) (1997)	Comedy
1462	Unforgotten: Twenty-Five Years After Willowbrook (1996)	Documentary
1463	That Old Feeling (1997)	Comedy|Romance
1464	Lost Highway (1997)	Crime|Drama|Fantasy|Film-Noir|Mystery|Romance
1465	Rosewood (1997)	Action|Drama
1466	Donnie Brasco (1997)	Crime|Drama
1467	Salut cousin! (1996)	Comedy|Drama
1468	Booty Call (1997)	Comedy|Romance
1470	Rhyme & Reason (1997)	Documentary
1471	Boys Life 2 (1997)	Drama
1472	City of Industry (1997)	Crime|Thriller
1473	Best Men (1997)	Action|Comedy|Crime|Drama
1474	Jungle2Jungle (a.k.a. Jungle 2 Jungle) (1997)	Children|Comedy
1475	Kama Sutra: A Tale of Love (1996)	Romance
1476	Private Parts (1997)	Comedy|Drama
1477	Love Jones (1997)	Romance
1479	Saint, The (1997)	Action|Romance|Sci-Fi|Thriller
1480	Smilla's Sense of Snow (1997)	Drama|Thriller
1482	Van, The (1996)	Comedy|Drama
1483	Crash (1996)	Drama|Thriller
1484	Daytrippers, The (1996)	Comedy|Drama|Mystery|Romance
1485	Liar Liar (1997)	Comedy
1486	Quiet Room, The (1996)	Drama
1487	Selena (1997)	Drama|Musical
1488	Devil's Own, The (1997)	Action|Drama|Thriller
1489	Cats Don't Dance (1997)	Animation|Children|Musical
1490	B*A*P*S (1997)	Comedy
1493	Love and Other Catastrophes (1996)	Romance
1495	Turbo: A Power Rangers Movie (1997)	Action|Adventure|Children
1496	Anna Karenina (1997)	Drama|Romance
1497	Double Team (1997)	Action
1498	Inventing the Abbotts (1997)	Drama|Romance
1499	Anaconda (1997)	Action|Adventure|Thriller
1500	Grosse Pointe Blank (1997)	Comedy|Crime|Romance
1501	Keys to Tulsa (1997)	Crime
1502	Kissed (1996)	Drama|Romance
1503	8 Heads in a Duffel Bag (1997)	Comedy
1504	Hollow Reed (1996)	Drama
1507	Paradise Road (1997)	Drama|War
1508	Traveller (1997)	Drama
1509	All Over Me (1997)	Drama
1510	Brother's Kiss, A (1997)	Drama
1511	Chef in Love, A (Shekvarebuli kulinaris ataserti retsepti) (1997)	Comedy|Romance
1513	Romy and Michele's High School Reunion (1997)	Comedy
1514	Temptress Moon (Feng Yue) (1996)	Romance
1515	Volcano (1997)	Action|Drama|Thriller
1516	Children of the Revolution (1996)	Comedy
1517	Austin Powers: International Man of Mystery (1997)	Action|Adventure|Comedy
1518	Breakdown (1997)	Action|Thriller
1519	Broken English (1996)	Drama
1520	Commandments (1997)	Romance
1522	Ripe (1996)	Drama
1523	Truth or Consequences, N.M. (1997)	Action|Crime|Romance
1524	Turning, The (1992)	Drama
1525	Warriors of Virtue (1997)	Action|Adventure|Children|Fantasy
1526	Fathers' Day (1997)	Comedy
1527	Fifth Element, The (1997)	Action|Adventure|Comedy|Sci-Fi
1528	Intimate Relations (1996)	Comedy
1529	Nowhere (1997)	Comedy|Drama
1531	Losing Chase (1996)	Drama
1532	Sprung (1997)	Comedy
1533	Promise, The (La promesse) (1996)	Drama
1534	Bonheur, Le (1965)	Drama
1535	Love! Valour! Compassion! (1997)	Drama|Romance
1537	Shall We Dance? (Shall We Dansu?) (1996)	Comedy|Drama|Romance
1538	Second Jungle Book: Mowgli & Baloo, The (1997)	Adventure|Children
1539	Twin Town (1997)	Comedy|Crime
1541	Addicted to Love (1997)	Comedy|Romance
1542	Brassed Off (1996)	Comedy|Drama|Romance
1543	Designated Mourner, The (1997)	Drama
1544	Lost World: Jurassic Park, The (1997)	Action|Adventure|Sci-Fi|Thriller
1545	Ponette (1996)	Drama
1546	Schizopolis (1996)	Comedy
1547	Shiloh (1997)	Children|Drama
1548	War at Home, The (1996)	Drama
1549	Rough Magic (1995)	Drama|Romance
1550	Trial and Error (1997)	Comedy|Romance
1551	Buddy (1997)	Adventure|Children|Drama
1552	Con Air (1997)	Action|Adventure|Thriller
1553	Late Bloomers (1996)	Comedy
1554	Pillow Book, The (1996)	Drama|Romance
1555	To Have, or Not (En avoir (ou pas)) (1995)	Drama
1556	Speed 2: Cruise Control (1997)	Action|Romance|Thriller
1557	Squeeze (1997)	Drama
1558	Sudden Manhattan (1997)	Comedy
1559	Next Step, The (1997)	Drama
1561	Wedding Bell Blues (1996)	Comedy
1562	Batman & Robin (1997)	Action|Adventure|Fantasy|Thriller
1563	Dream With the Fishes (1997)	Drama
1564	For Roseanna (Roseanna's Grave) (1997)	Comedy|Drama|Romance
1565	Head Above Water (1996)	Comedy|Thriller
1566	Hercules (1997)	Adventure|Animation|Children|Comedy|Musical
1567	Last Time I Committed Suicide, The (1997)	Drama
1568	MURDER and murder (1996)	Crime|Drama|Mystery
1569	My Best Friend's Wedding (1997)	Comedy|Romance
1570	Tetsuo II: Body Hammer (1992)	Horror|Sci-Fi
1571	When the Cat's Away (Chacun cherche son chat) (1996)	Comedy|Romance
1572	Contempt (Mépris, Le) (1963)	Drama
1573	Face/Off (1997)	Action|Crime|Drama|Thriller
1574	Fall (1997)	Romance
1575	Gabbeh (1996)	Drama
1577	Mondo (1996)	Drama
1578	Innocent Sleep, The (1996)	Crime
1579	For Ever Mozart (1996)	Drama
1580	Men in Black (a.k.a. MIB) (1997)	Action|Comedy|Sci-Fi
1581	Out to Sea (1997)	Comedy
1582	Wild America (1997)	Adventure|Children
1583	Simple Wish, A (1997)	Children|Fantasy
1584	Contact (1997)	Drama|Sci-Fi
1585	Love Serenade (1996)	Comedy
1586	G.I. Jane (1997)	Action|Drama
1587	Conan the Barbarian (1982)	Action|Adventure|Fantasy
1588	George of the Jungle (1997)	Children|Comedy
1589	Cop Land (1997)	Action|Crime|Drama|Thriller
1590	Event Horizon (1997)	Horror|Sci-Fi|Thriller
1591	Spawn (1997)	Action|Adventure|Sci-Fi|Thriller
1592	Air Bud (1997)	Children|Comedy
1593	Picture Perfect (1997)	Comedy|Romance
1594	In the Company of Men (1997)	Comedy|Drama
1595	Free Willy 3: The Rescue (1997)	Adventure|Children|Drama
1596	Career Girls (1997)	Drama
1597	Conspiracy Theory (1997)	Drama|Mystery|Romance|Thriller
1598	Desperate Measures (1998)	Crime|Drama|Thriller
1599	Steel (1997)	Action
1600	She's So Lovely (1997)	Drama|Romance
1601	Hoodlum (1997)	Crime|Drama|Film-Noir
1602	Leave It to Beaver (1997)	Comedy
1603	Mimic (1997)	Horror|Sci-Fi|Thriller
1604	Money Talks (1997)	Action|Comedy
1605	Excess Baggage (1997)	Adventure|Romance
1606	Kull the Conqueror (1997)	Action|Adventure
1608	Air Force One (1997)	Action|Thriller
1609	187 (One Eight Seven) (1997)	Drama|Thriller
1610	Hunt for Red October, The (1990)	Action|Adventure|Thriller
1611	My Own Private Idaho (1991)	Drama|Romance
1612	Kiss Me, Guido (1997)	Comedy
1613	Star Maps (1997)	Drama
1614	In & Out (1997)	Comedy
1615	Edge, The (1997)	Adventure|Drama
1616	Peacemaker, The (1997)	Action|Thriller|War
1617	L.A. Confidential (1997)	Crime|Film-Noir|Mystery|Thriller
1619	Seven Years in Tibet (1997)	Adventure|Drama|War
1620	Kiss the Girls (1997)	Crime|Drama|Mystery|Thriller
1621	Soul Food (1997)	Drama
1622	Kicked in the Head (1997)	Comedy|Drama
1623	Wishmaster (1997)	Horror
1624	Thousand Acres, A (1997)	Drama
1625	Game, The (1997)	Drama|Mystery|Thriller
1626	Fire Down Below (1997)	Action|Drama|Thriller
1627	U Turn (1997)	Crime|Drama|Mystery
1628	Locusts, The (1997)	Drama
1629	MatchMaker, The (1997)	Comedy|Romance
1630	Lay of the Land, The (1997)	Comedy|Drama
1631	Assignment, The (1997)	Action|Thriller
1632	Smile Like Yours, A (1997)	Comedy|Romance
1633	Ulee's Gold (1997)	Drama
1635	Ice Storm, The (1997)	Drama
1636	Stag (1997)	Action|Thriller
1639	Chasing Amy (1997)	Comedy|Drama|Romance
1640	How to Be a Player (1997)	Comedy
1641	Full Monty, The (1997)	Comedy|Drama
1642	Indian Summer (a.k.a. Alive & Kicking) (1996)	Comedy|Drama
1643	Mrs. Brown (a.k.a. Her Majesty, Mrs. Brown) (1997)	Drama|Romance
1644	I Know What You Did Last Summer (1997)	Horror|Mystery|Thriller
1645	Devil's Advocate, The (1997)	Drama|Mystery|Thriller
1646	RocketMan (a.k.a. Rocket Man) (1997)	Children|Comedy|Romance|Sci-Fi
1647	Playing God (1997)	Crime|Drama|Thriller
1648	House of Yes, The (1997)	Comedy|Drama
1649	Fast, Cheap & Out of Control (1997)	Documentary
1650	Washington Square (1997)	Drama
1651	Telling Lies in America (1997)	Drama
1652	Year of the Horse (1997)	Documentary
1653	Gattaca (1997)	Drama|Sci-Fi|Thriller
1654	FairyTale: A True Story (1997)	Children|Drama|Fantasy
1655	Phantoms (1998)	Drama|Horror|Thriller
1656	Swept from the Sea (1997)	Drama|Romance
1657	Wonderland (1997)	Comedy|Documentary
1658	Life Less Ordinary, A (1997)	Romance|Thriller
1659	Hurricane Streets (1997)	Drama
1660	Eve's Bayou (1997)	Drama
1661	Switchback (1997)	Crime|Mystery|Thriller
1662	Gang Related (1997)	Crime
1663	Stripes (1981)	Comedy|War
1664	Nenette and Boni (Nénette et Boni) (1996)	Drama
1665	Bean (1997)	Comedy
1666	Hugo Pool (1997)	Romance
1667	Mad City (1997)	Action|Drama
1668	One Night Stand (1997)	Drama
1669	Tango Lesson, The (1997)	Romance
1670	Welcome to Sarajevo (1997)	Drama|War
1671	Deceiver (1997)	Crime|Drama|Thriller
1672	Rainmaker, The (1997)	Drama
1673	Boogie Nights (1997)	Drama
1674	Witness (1985)	Drama|Romance|Thriller
1675	Incognito (1997)	Crime|Thriller
1676	Starship Troopers (1997)	Action|Sci-Fi
1677	Critical Care (1997)	Comedy|Drama
1678	Joy Luck Club, The (1993)	Drama|Romance
1679	Chairman of the Board (1998)	Comedy
1680	Sliding Doors (1998)	Drama|Romance
1681	Mortal Kombat: Annihilation (1997)	Action|Adventure|Fantasy
1682	Truman Show, The (1998)	Comedy|Drama|Sci-Fi
1683	Wings of the Dove, The (1997)	Drama|Romance
1684	Mrs. Dalloway (1997)	Drama|Romance
1685	I Love You, I Love You Not (1996)	Drama|Romance
1686	Red Corner (1997)	Crime|Thriller
1687	Jackal, The (1997)	Action|Thriller
1688	Anastasia (1997)	Adventure|Animation|Children|Drama|Musical
1689	Man Who Knew Too Little, The (1997)	Comedy|Crime|Thriller
1690	Alien: Resurrection (1997)	Action|Horror|Sci-Fi
1692	Alien Escape (1995)	Horror|Sci-Fi
1693	Amistad (1997)	Drama|Mystery
1694	Apostle, The (1997)	Drama
1695	Artemisia (1997)	Drama
1696	Bent (1997)	Drama|War
1697	Bang (1995)	Crime|Drama
1698	Boys, Les (1997)	Comedy
1699	Butcher Boy, The (1997)	Comedy|Drama
1701	Deconstructing Harry (1997)	Comedy|Drama
1702	Flubber (1997)	Children|Comedy|Fantasy
1703	For Richer or Poorer (1997)	Comedy
1704	Good Will Hunting (1997)	Drama|Romance
1705	Guy (1997)	Drama
1706	Tar (1996)	Drama
1707	Home Alone 3 (1997)	Children|Comedy
1708	Ill Gotten Gains (1997)	Drama
1709	Legal Deceit (1997)	Thriller
1710	Man of Her Dreams (a.k.a. The Fiancé) (1997)	Drama
1711	Midnight in the Garden of Good and Evil (1997)	Crime|Drama|Mystery
1713	Mouse Hunt (1997)	Children|Comedy
1714	Never Met Picasso (1996)	Romance
1715	Office Killer (1997)	Thriller
1716	Other Voices, Other Rooms (1995)	Drama
1717	Scream 2 (1997)	Comedy|Horror|Mystery|Thriller
1718	Stranger in the House (1997)	Thriller
1719	Sweet Hereafter, The (1997)	Drama
1720	Time Tracers (1995)	Action|Adventure|Sci-Fi
1721	Titanic (1997)	Drama|Romance
1722	Tomorrow Never Dies (1997)	Action|Adventure|Thriller
1723	Twisted (1996)	Comedy|Drama
1724	Full Speed (À toute vitesse) (1996)	Drama
1725	Education of Little Tree, The (1997)	Drama
1726	Postman, The (1997)	Action|Adventure|Drama|Sci-Fi
1727	Horse Whisperer, The (1998)	Drama|Romance
1728	Winter Guest, The (1997)	Drama
1729	Jackie Brown (1997)	Crime|Drama|Thriller
1730	Kundun (1997)	Drama
1731	Mr. Magoo (1997)	Comedy
1732	Big Lebowski, The (1998)	Comedy|Crime
1733	Afterglow (1997)	Drama|Romance
1734	My Life in Pink (Ma vie en rose) (1997)	Comedy|Drama
1735	Great Expectations (1998)	Drama|Romance
1738	Vermin (1998)	Comedy
1739	3 Ninjas: High Noon On Mega Mountain (1998)	Action|Children|Comedy
1740	Men of Means (1999)	Action|Drama
1742	Caught Up (1998)	Crime
1743	Arguing the World (1998)	Documentary
1744	Firestorm (1998)	Action|Adventure|Thriller
1746	Senseless (1998)	Comedy
1747	Wag the Dog (1997)	Comedy
1748	Dark City (1998)	Adventure|Film-Noir|Sci-Fi|Thriller
1749	Leading Man, The (1996)	Romance
1750	Star Kid (1997)	Adventure|Children|Fantasy|Sci-Fi
1752	Hard Rain (1998)	Action|Crime|Thriller
1753	Half Baked (1998)	Comedy
1754	Fallen (1998)	Crime|Drama|Fantasy|Thriller
1755	Shooting Fish (1997)	Comedy|Romance
1756	Prophecy II, The (1998)	Horror
1757	Fallen Angels (Duo luo tian shi) (1995)	Drama|Romance
1759	Four Days in September (O Que É Isso, Companheiro?) (1997)	Drama
1760	Spice World (1997)	Comedy
1762	Deep Rising (1998)	Action|Horror|Sci-Fi
1764	Tainted (1998)	Comedy|Thriller
1765	Letter From Death Row, A (1998)	Crime|Drama
1767	Music From Another Room (1998)	Drama|Romance
1768	Mother and Son (Mat i syn) (1997)	Drama
1769	Replacement Killers, The (1998)	Action|Crime|Thriller
1770	B. Monkey (1998)	Crime|Romance|Thriller
1771	Night Flier (1997)	Horror
1772	Blues Brothers 2000 (1998)	Action|Comedy|Musical
1773	Tokyo Fist (Tokyo ken) (1995)	Action|Drama
1774	Mass Transit (1998)	Comedy|Drama
1776	Ride (1998)	Drama
1777	Wedding Singer, The (1998)	Comedy|Romance
1779	Sphere (1998)	Sci-Fi|Thriller
1780	Ayn Rand: A Sense of Life (1997)	Documentary
1781	Further Gesture, A (1996)	Drama
1782	Little City (1998)	Comedy|Romance
1783	Palmetto (1998)	Crime|Drama|Mystery|Romance|Thriller
1784	As Good as It Gets (1997)	Comedy|Drama|Romance
1785	King of New York (1990)	Crime|Thriller
1787	Paralyzing Fear: The Story of Polio in America, A (1998)	Documentary
1788	Men with Guns (1997)	Action|Drama
1789	Sadness of Sex, The (1995)	Drama
1791	Twilight (1998)	Crime|Drama|Thriller
1792	U.S. Marshals (1998)	Action|Crime|Thriller
1793	Welcome to Woop-Woop (1997)	Comedy
1794	Love and Death on Long Island (1997)	Comedy|Drama
1795	Callejón de los milagros, El (1995)	Drama
1796	In God's Hands (1998)	Action|Drama
1797	Everest (1998)	Documentary|IMAX
1798	Hush (1998)	Thriller
1799	Suicide Kings (1997)	Comedy|Crime|Drama|Mystery|Thriller
1801	Man in the Iron Mask, The (1998)	Action|Adventure|Drama
1804	Newton Boys, The (1998)	Crime|Drama
1805	Wild Things (1998)	Crime|Drama|Mystery|Thriller
1806	Paulie (1998)	Adventure|Children|Comedy
1807	Cool, Dry Place, A (1998)	Drama
1809	Fireworks (Hana-bi) (1997)	Crime|Drama
1810	Primary Colors (1998)	Comedy|Drama
1811	Niagara, Niagara (1997)	Drama
1812	Wide Awake (1998)	Children|Comedy|Drama
1814	Price Above Rubies, A (1998)	Drama
1815	Eden (1997)	Drama
1816	Two Girls and a Guy (1997)	Comedy|Drama
1817	No Looking Back (1998)	Drama|Romance
1819	Storefront Hitchcock (1997)	Documentary|Musical
1820	Proposition, The (1998)	Drama|Romance
1821	Object of My Affection, The (1998)	Comedy|Romance
1822	Meet the Deedles (1998)	Children|Comedy
1824	Homegrown (1998)	Comedy|Thriller
1825	Player's Club, The (1998)	Comedy|Drama
1826	Barney's Great Adventure (1998)	Adventure|Children
1827	Big One, The (1997)	Comedy|Documentary
1829	Chinese Box (1997)	Drama|Romance
1830	Follow the Bitch (1996)	Comedy
1831	Lost in Space (1998)	Action|Adventure|Sci-Fi
1832	Heaven's Burning (1997)	Action|Drama
1833	Mercury Rising (1998)	Action|Drama|Thriller
1834	Spanish Prisoner, The (1997)	Crime|Drama|Mystery|Thriller
1835	City of Angels (1998)	Drama|Fantasy|Romance
1836	Last Days of Disco, The (1998)	Comedy|Drama
1837	Odd Couple II, The (1998)	Comedy
1839	My Giant (1998)	Comedy
1840	He Got Game (1998)	Drama
1841	Gingerbread Man, The (1998)	Drama|Thriller
1842	Illtown (1996)	Crime|Drama
1843	Slappy and the Stinkers (1998)	Children|Comedy
1844	Live Flesh (Carne trémula) (1997)	Drama|Romance
1845	Zero Effect (1998)	Comedy|Mystery|Thriller
1846	Nil By Mouth (1997)	Drama
1848	Borrowers, The (1997)	Adventure|Children|Comedy|Fantasy
1849	Prince Valiant (1997)	Adventure
1850	I Love You, Don't Touch Me! (1998)	Drama|Romance
1851	Leather Jacket Love Story (1997)	Drama|Romance
1852	Love Walked In (1998)	Drama|Thriller
1853	Alan Smithee Film: Burn Hollywood Burn, An (1997)	Comedy
1854	Kissing a Fool (1998)	Comedy|Romance
1855	Krippendorf's Tribe (1998)	Comedy
1856	Kurt & Courtney (1998)	Documentary
1857	Real Blonde, The (1997)	Comedy
1858	Mr. Nice Guy (Yat goh ho yan) (1997)	Action|Comedy
1859	Taste of Cherry (Ta'm e guilass) (1997)	Drama
1860	Character (Karakter) (1997)	Drama
1861	Junk Mail (Budbringeren) (1997)	Comedy|Thriller
1862	Species II (1998)	Horror|Sci-Fi
1863	Major League: Back to the Minors (1998)	Comedy
1864	Sour Grapes (1998)	Comedy
1865	Wild Man Blues (1997)	Documentary
1866	Big Hit, The (1998)	Action|Comedy|Crime
1867	Tarzan and the Lost City (1998)	Action|Adventure
1869	Black Dog (1998)	Action|Thriller
1870	Dancer, Texas Pop. 81 (1998)	Comedy|Drama
1871	Friend of the Deceased, A (Priyatel pokonika) (1997)	Comedy|Drama
1872	Go Now (1995)	Drama
1873	Misérables, Les (1998)	Crime|Drama|Romance|War
1874	Still Breathing (1997)	Comedy|Romance
1875	Clockwatchers (1997)	Comedy
1876	Deep Impact (1998)	Drama|Sci-Fi|Thriller
1877	Little Men (1998)	Drama
1878	Woo (1998)	Comedy|Romance
1879	Hanging Garden, The (1997)	Drama|Romance
1880	Lawn Dogs (1997)	Drama
1881	Quest for Camelot (1998)	Adventure|Animation|Children|Fantasy|Musical
1882	Godzilla (1998)	Action|Sci-Fi|Thriller
1883	Bulworth (1998)	Comedy|Drama|Romance
1884	Fear and Loathing in Las Vegas (1998)	Adventure|Comedy|Drama
1885	Opposite of Sex, The (1998)	Comedy|Drama|Romance
1886	I Got the Hook Up (1998)	Comedy
1887	Almost Heroes (1998)	Adventure|Comedy|Western
1888	Hope Floats (1998)	Comedy|Drama|Romance
1889	Insomnia (1997)	Drama|Mystery|Thriller
1890	Little Boy Blue (1997)	Drama
1891	Ugly, The (1997)	Horror|Thriller
1892	Perfect Murder, A (1998)	Thriller
1893	Beyond Silence (Jenseits der Stille) (1996)	Drama
1894	Six Days Seven Nights (1998)	Adventure|Comedy|Romance
1895	Can't Hardly Wait (1998)	Comedy|Drama|Romance
1896	Cousin Bette (1998)	Comedy
1897	High Art (1998)	Drama|Romance
1898	Land Girls, The (1998)	Drama|War
1899	Passion in the Desert (1998)	Adventure|Drama
1900	Children of Heaven, The (Bacheha-Ye Aseman) (1997)	Comedy|Drama
1901	Dear Jesse (1997)	Documentary
1902	Dream for an Insomniac (1996)	Drama|Romance
1903	Hav Plenty (1997)	Comedy
1904	Henry Fool (1997)	Comedy|Drama
1905	Marie from the Bay of Angels (Marie Baie Des Anges) (1997)	Drama
1906	Mr. Jealousy (1997)	Comedy|Romance
1907	Mulan (1998)	Adventure|Animation|Children|Comedy|Drama|Musical|Romance
1908	Resurrection Man (1998)	Drama|Thriller
1909	X-Files: Fight the Future, The (1998)	Action|Crime|Mystery|Sci-Fi|Thriller
1910	I Went Down (1997)	Comedy|Crime|Drama
1911	Dr. Dolittle (1998)	Comedy
1912	Out of Sight (1998)	Comedy|Crime|Drama|Romance|Thriller
1913	Picnic at Hanging Rock (1975)	Drama|Mystery
1914	Smoke Signals (1998)	Comedy|Drama
1915	Voyage to the Beginning of the World (Viagem ao Princípio do Mundo) (1997)	Drama
1916	Buffalo '66 (a.k.a. Buffalo 66) (1998)	Drama|Romance
1917	Armageddon (1998)	Action|Romance|Sci-Fi|Thriller
1918	Lethal Weapon 4 (1998)	Action|Comedy|Crime|Thriller
1919	Madeline (1998)	Children|Comedy
1920	Small Soldiers (1998)	Animation|Children|Fantasy|War
1921	Pi (1998)	Drama|Sci-Fi|Thriller
1922	Whatever (1998)	Drama
1923	There's Something About Mary (1998)	Comedy|Romance
1924	Plan 9 from Outer Space (1959)	Horror|Sci-Fi
1925	Wings (1927)	Action|Drama|Romance|War
1926	Broadway Melody, The (1929)	Musical
1927	All Quiet on the Western Front (1930)	Action|Drama|War
1928	Cimarron (1931)	Drama|Western
1929	Grand Hotel (1932)	Drama|Romance
1930	Cavalcade (1933)	Drama|Romance|War
1931	Mutiny on the Bounty (1935)	Adventure|Drama
1932	Great Ziegfeld, The (1936)	Drama|Musical
1933	Life of Emile Zola, The (1937)	Drama
1934	You Can't Take It with You (1938)	Comedy|Romance
1935	How Green Was My Valley (1941)	Drama|Musical|Romance
1936	Mrs. Miniver (1942)	Drama|War
1937	Going My Way (1944)	Comedy|Drama|Musical
1938	Lost Weekend, The (1945)	Drama
1939	Best Years of Our Lives, The (1946)	Drama|War
1940	Gentleman's Agreement (1947)	Drama
1941	Hamlet (1948)	Drama
1942	All the King's Men (1949)	Drama
1943	Greatest Show on Earth, The (1952)	Drama
1944	From Here to Eternity (1953)	Drama|Romance|War
1945	On the Waterfront (1954)	Crime|Drama
1946	Marty (1955)	Drama|Romance
1947	West Side Story (1961)	Drama|Musical|Romance
1948	Tom Jones (1963)	Adventure|Comedy|Romance
1949	Man for All Seasons, A (1966)	Drama
1950	In the Heat of the Night (1967)	Drama|Mystery
1951	Oliver! (1968)	Drama|Musical
1952	Midnight Cowboy (1969)	Drama
1953	French Connection, The (1971)	Action|Crime|Thriller
1954	Rocky (1976)	Drama
1955	Kramer vs. Kramer (1979)	Drama
1956	Ordinary People (1980)	Drama
1957	Chariots of Fire (1981)	Drama
1958	Terms of Endearment (1983)	Comedy|Drama
1959	Out of Africa (1985)	Drama|Romance
1960	Last Emperor, The (1987)	Drama
1961	Rain Man (1988)	Drama
1962	Driving Miss Daisy (1989)	Drama
1963	Take the Money and Run (1969)	Comedy|Crime
1964	Klute (1971)	Drama|Mystery
1965	Repo Man (1984)	Comedy|Sci-Fi
1966	Metropolitan (1990)	Comedy
1967	Labyrinth (1986)	Adventure|Fantasy|Musical
1968	Breakfast Club, The (1985)	Comedy|Drama
1969	Nightmare on Elm Street 2: Freddy's Revenge, A (1985)	Horror
1970	Nightmare on Elm Street 3: Dream Warriors, A (1987)	Horror|Thriller
1971	Nightmare on Elm Street 4: The Dream Master, A (1988)	Horror|Thriller
1972	Nightmare on Elm Street 5: The Dream Child, A (1989)	Horror
1973	Freddy's Dead: The Final Nightmare (Nightmare on Elm Street Part 6: Freddy's Dead, A) (1991)	Horror
1974	Friday the 13th (1980)	Horror|Mystery|Thriller
1975	Friday the 13th Part 2 (1981)	Horror
1976	Friday the 13th Part 3: 3D (1982)	Horror
1977	Friday the 13th Part IV: The Final Chapter (1984)	Horror
1978	Friday the 13th Part V: A New Beginning (1985)	Horror
1979	Friday the 13th Part VI: Jason Lives (1986)	Horror
1980	Friday the 13th Part VII: The New Blood (1988)	Horror
1981	Friday the 13th Part VIII: Jason Takes Manhattan (1989)	Horror
1982	Halloween (1978)	Horror
1983	Halloween II (1981)	Horror
1984	Halloween III: Season of the Witch (1982)	Horror
1985	Halloween 4: The Return of Michael Myers (1988)	Horror
1986	Halloween 5: The Revenge of Michael Myers (1989)	Horror
1987	Prom Night (1980)	Horror
1988	Hello Mary Lou: Prom Night II (1987)	Horror
1989	Prom Night III: The Last Kiss (1989)	Horror
1990	Prom Night IV: Deliver Us From Evil (1992)	Horror
1991	Child's Play (1988)	Horror|Thriller
1992	Child's Play 2 (1990)	Horror|Thriller
1993	Child's Play 3 (1991)	Comedy|Horror|Thriller
1994	Poltergeist (1982)	Horror|Thriller
1995	Poltergeist II: The Other Side (1986)	Horror|Thriller
1996	Poltergeist III (1988)	Horror|Thriller
1997	Exorcist, The (1973)	Horror|Mystery
1998	Exorcist II: The Heretic (1977)	Horror
1999	Exorcist III, The (1990)	Horror
2000	Lethal Weapon (1987)	Action|Comedy|Crime|Drama
2001	Lethal Weapon 2 (1989)	Action|Comedy|Crime|Drama
2002	Lethal Weapon 3 (1992)	Action|Comedy|Crime|Drama
2003	Gremlins (1984)	Comedy|Horror
2004	Gremlins 2: The New Batch (1990)	Comedy|Horror
2005	Goonies, The (1985)	Action|Adventure|Children|Comedy|Fantasy
2006	Mask of Zorro, The (1998)	Action|Comedy|Romance
2007	Polish Wedding (1998)	Comedy
2008	This World, Then the Fireworks (1997)	Crime|Drama|Film-Noir
2009	Soylent Green (1973)	Drama|Mystery|Sci-Fi|Thriller
2010	Metropolis (1927)	Drama|Sci-Fi
2011	Back to the Future Part II (1989)	Adventure|Comedy|Sci-Fi
2012	Back to the Future Part III (1990)	Adventure|Comedy|Sci-Fi|Western
2013	Poseidon Adventure, The (1972)	Action|Adventure|Drama
2014	Freaky Friday (1977)	Children|Comedy|Fantasy
2015	Absent-Minded Professor, The (1961)	Children|Comedy|Fantasy
2016	Apple Dumpling Gang Rides Again, The (1979)	Children|Comedy|Western
2017	Babes in Toyland (1961)	Children|Fantasy|Musical
2018	Bambi (1942)	Animation|Children|Drama
2019	Seven Samurai (Shichinin no samurai) (1954)	Action|Adventure|Drama
2020	Dangerous Liaisons (1988)	Drama|Romance
2021	Dune (1984)	Adventure|Sci-Fi
2022	Last Temptation of Christ, The (1988)	Drama
2023	Godfather: Part III, The (1990)	Crime|Drama|Mystery|Thriller
2024	Rapture, The (1991)	Drama|Mystery
2025	Lolita (1997)	Drama|Romance
2026	Disturbing Behavior (1998)	Horror|Thriller
2027	Jane Austen's Mafia! (1998)	Comedy|Crime
2028	Saving Private Ryan (1998)	Action|Drama|War
2029	Billy's Hollywood Screen Kiss (1997)	Comedy|Romance
2030	East Palace West Palace (Dong gong xi gong) (1997)	Drama
2031	Million Dollar Duck, The (a.k.a. $1,000,000 Duck) (1971)	Children|Comedy
2032	Barefoot Executive, The (1971)	Children|Comedy
2033	Black Cauldron, The (1985)	Adventure|Animation|Children|Fantasy
2034	Black Hole, The (1979)	Children|Sci-Fi
2035	Blackbeard's Ghost (1968)	Children|Comedy
2036	Blank Check (1994)	Children|Comedy
2037	Candleshoe (1977)	Adventure|Children|Comedy
2038	Cat from Outer Space, The (1978)	Children|Comedy|Sci-Fi
2039	Cheetah (1989)	Adventure|Children
2040	Computer Wore Tennis Shoes, The (1969)	Children|Comedy
2041	Condorman (1981)	Action|Adventure|Children|Comedy
2042	D2: The Mighty Ducks (1994)	Children|Comedy
2043	Darby O'Gill and the Little People (1959)	Adventure|Children|Fantasy
2044	Devil and Max Devlin, The (1981)	Comedy|Fantasy
2045	Far Off Place, A (1993)	Adventure|Children|Drama|Romance
2046	Flight of the Navigator (1986)	Adventure|Children|Sci-Fi
2047	Gnome-Mobile, The (1967)	Adventure|Children|Fantasy|Musical
2048	Great Mouse Detective, The (1986)	Action|Animation|Children|Crime
2049	Happiest Millionaire, The (1967)	Comedy|Musical
2050	Herbie Goes Bananas (1980)	Adventure|Children|Comedy
2051	Herbie Goes to Monte Carlo (1977)	Adventure|Children|Comedy
2052	Hocus Pocus (1993)	Children|Comedy|Fantasy|Horror
2053	Honey, I Blew Up the Kid (1992)	Children|Comedy|Sci-Fi
2054	Honey, I Shrunk the Kids (1989)	Adventure|Children|Comedy|Fantasy|Sci-Fi
2055	Hot Lead and Cold Feet (1978)	Action|Comedy|Western
2056	In Search of the Castaways (1962)	Adventure|Children
2057	Incredible Journey, The (1963)	Adventure|Children
2058	Negotiator, The (1998)	Action|Crime|Drama|Mystery|Thriller
2059	Parent Trap, The (1998)	Children|Comedy|Romance
2060	BASEketball (1998)	Comedy
2061	Full Tilt Boogie (1997)	Documentary
2062	Governess, The (1998)	Drama|Romance
2063	Seventh Heaven (Septième ciel, Le) (1997)	Drama|Romance
2064	Roger & Me (1989)	Documentary
2065	Purple Rose of Cairo, The (1985)	Comedy|Drama|Fantasy|Romance
2066	Out of the Past (1947)	Film-Noir
2067	Doctor Zhivago (1965)	Drama|Romance|War
2068	Fanny and Alexander (Fanny och Alexander) (1982)	Drama|Fantasy|Mystery
2069	Trip to Bountiful, The (1985)	Drama
2070	Tender Mercies (1983)	Drama|Romance|Western
2071	And the Band Played On (1993)	Drama
2072	'burbs, The (1989)	Comedy
2073	Fandango (1985)	Comedy
2074	Night Porter, The (Portiere di notte, Il) (1974)	Crime|Drama|Romance
2075	Mephisto (1981)	Drama|War
2076	Blue Velvet (1986)	Drama|Mystery|Thriller
2077	Journey of Natty Gann, The (1985)	Adventure|Children
2078	Jungle Book, The (1967)	Animation|Children|Comedy|Musical
2079	Kidnapped (1960)	Adventure|Children|Drama
2080	Lady and the Tramp (1955)	Animation|Children|Comedy|Romance
2081	Little Mermaid, The (1989)	Animation|Children|Comedy|Musical|Romance
2082	Mighty Ducks, The (1992)	Children|Comedy
[truncated: 25,279 more rows]
