# Supplementary material
Source: ML conference proceedings conference paper supplement (https://proceedings.neurips.cc/paper_files/paper/2022/hash/6faf3b8ed0df532c14d0fc009e451b6d-Abstract.html)
Supplement: Supplementary file 1 [file 6faf3b8ed0df532c14d0fc009e451b6d-Supplemental-Conference.zip › codes/dataset/tweets.txt]

@BreakingNews,,BreakingNews,,Labour opposition leader Jeremy Corbyn tables motion for vote of no-confidence after PM May suffers major defeat by more than 200 votes on her Brexit plan.https://www.nbcnews.com/storyline/brexit-referendum/british-prime-minister-may-loses-historic-vote-her-brexit-deal-n958791 …,,labour opposition leader jeremy corbyn tables motion vote noconfidence pm may suffers major defeat 200 votes brexit,,41,,41,,1547599697,,2019-01-15 19:48:17
@BreakingNews,,BreakingNews,,British PM May's Brexit deal suffers critical parliamentary rejection by more than 200 votes, throwing up a major question mark over what’s next for Britain as the clock ticks down to its departure from the EU - @NBCNews,,british pm mays brexit deal suffers critical parliamentary rejection 200 votes throwing major question mark what’s next britain clock ticks departure eu  nbcnews,,94,,81,,1547599291,,2019-01-15 19:41:31
@BreakingNews,,BreakingNews,,LIVE: Result of critical parliamentary vote on British PM May's Brexit deal expected soon.https://www.pscp.tv/w/1PlKQyZjwRZKE ,,live result critical parliamentary vote british pm mays brexit deal expected,,50,,35,,1547599142,,2019-01-15 19:39:02
@BreakingNews,,BreakingNews,,LIVE: Trump nominee for new US attorney general, William Barr, testifies in US Senate confirmation hearing. http://nbcnews.to/2QNZOT2 https://www.pscp.tv/w/1vOxwZYDVRdJB ,,live trump nominee new us attorney general william barr testifies us senate confirmation hearing,,51,,27,,1547583535,,2019-01-15 15:18:55
@BreakingNews,,BreakingNews,,Upscale hotel complex in Kenya's capital is under attack, with a blast and heavy gunfire, witnesses and police say, with several vehicles are burning, and people are being carried from the scene.   https://nbcnews.to/2DaMTXv https://nbcnews.to/2DaNjgx ,,upscale hotel complex kenyas capital attack blast heavy gunfire witnesses police say several vehicles burning people carried scene,,57,,84,,1547578639,,2019-01-15 13:57:19
@BreakingNews,,BreakingNews,,US House Minority Leader McCarthy: GOP Steering Cmte. votes unanimously to remove Rep. Steve King from all committees after white supremacy comments.https://nbcnews.to/2AFFP3F ,,us house minority leader mccarthy gop steering cmte votes unanimously remove rep steve king committees white supremacy,,381,,135,,1547532027,,2019-01-15 01:00:27
@BreakingNews,,BreakingNews,,Huge blast rocks Kabul on Monday evening; reportedly occurred near Green Village compound. https://nbcnews.to/2FxzvOJ  - @TOLOnews,,huge blast rocks kabul monday evening reportedly occurred near green village compound  tolonews,,29,,36,,1547497388,,2019-01-14 15:23:08
@BreakingNews,,BreakingNews,,Gdańsk Mayor Paweł Adamowicz has died after being stabbed during an attack on a stage at a charity event, Polish media report. https://nbcnews.to/2FAL5Jf ,,gdańsk mayor paweł adamowicz died stabbed attack stage charity event polish media report,,110,,97,,1547492753,,2019-01-14 14:05:53
@BreakingNews,,BreakingNews,,China hands death sentence to Canadian convicted of drug trafficking amid turmoil over Canada’s detention of Huawei executive. https://nbcnews.to/2D8GQ5X  - @WashingtonPost,,china hands death sentence canadian convicted drug trafficking amid turmoil canada’s detention huawei executive  washingtonpost,,42,,56,,1547488634,,2019-01-14 12:57:14
@BreakingNews,,BreakingNews,,Several people injured in powerful explosion at a bakery in central Paris; believed to have been caused by a gas leak, French police say.http://bit.ly/2FmsQb8 ,,several people injured powerful explosion bakery central paris believed caused gas leak french police,,51,,60,,1547301634,,2019-01-12 09:00:34
@BreakingNews,,BreakingNews,,Many injured in "serious" double-decker bus crash in Ottawa. http://nbcnews.to/2D5fCx8  - @CTVNewspic.twitter.com/myXrfGae2h,,many injured serious doubledecker bus crash ottawa  ctvnewspictwittercommyxrfgae2h,,31,,43,,1547263633,,2019-01-11 22:27:13
@BreakingNews,,BreakingNews,,Jayme Closs, a Wisconsin girl who has been missing since her parents were found dead in their home in October, has been found alive, authorities saidhttps://nbcnews.to/2FmJIgS ,,jayme closs wisconsin girl missing since parents found dead home october found alive authorities,,421,,198,,1547191767,,2019-01-11 02:29:27
@BreakingNews,,BreakingNews,,After delayed results and international pressure, Congo’s electoral commission announces that opposition leader Felix Tshisekedi has won the presidential election.https://nbcnews.to/2FnWFXK ,,delayed results international pressure congo’s electoral commission announces opposition leader felix tshisekedi presidential,,43,,30,,1547104823,,2019-01-10 02:20:23
@BreakingNews,,BreakingNews,,Australia says it is considering granting Rahaf Mohammed Alqunun refugee resettlement after the UN on Wednesday deemed her a refugee.https://www.nbcnews.com/news/world/rahaf-mohammed-alqunun-deemed-refugee-australia-might-take-her-n956551 …,,australia says considering granting rahaf mohammed alqunun refugee resettlement un wednesday deemed,,100,,35,,1547063814,,2019-01-09 14:56:54
@BreakingNews,,BreakingNews,,North Korea says Kim Jong Un is on a visit to China from Jan. 7-10, @YonhapNews reports.  Chinese state media says that Kim is visiting at the invitation of Chinese President Xi.,,north korea says kim jong un visit china jan 710 yonhapnews reports  chinese state media says kim visiting invitation chinese president xi,,69,,47,,1546920839,,2019-01-07 23:13:59
@BreakingNews,,BreakingNews,,An 18-year-old Saudi woman who was stopped in Bangkok as she was trying to travel to Australia for asylum to escape alleged abuse by her family has left her airport hotel room for temporary admission into Thailand.https://nbcnews.to/2CUjJvH ,,18yearold saudi woman stopped bangkok trying travel australia asylum escape alleged abuse family left airport hotel room temporary admission,,256,,89,,1546889677,,2019-01-07 14:34:37
@BreakingNews,,BreakingNews,,Soldiers from Gabon's Republican Guard have appeared on state television saying they have launched a coup "to restore democracy" in the West African country.https://nbcnews.to/2CVGG1D ,,soldiers gabons republican guard appeared state television saying launched coup to restore democracy west african,,98,,79,,1546885433,,2019-01-07 13:23:53
@BreakingNews,,BreakingNews,,Malaysian King Sultan Muhammad V has abdicated after just 2 years on the throne, palace says in statement Sunday - ⁦@AP⁩https://apnews.com/d7d868d9d5d4484ab1298d6be3f44dcb?utm_medium=AP&utm_campaign=SocialFlow&utm_source=Twitter …,,malaysian king sultan muhammad v abdicated 2 years throne palace says statement sunday ,,45,,38,,1546797574,,2019-01-06 12:59:34
@BreakingNews,,BreakingNews,,President Trump will not withdraw US troops from northern Syria until Turkish government guarantees it won’t then attack Syrian Kurdish forces that have been critical allies for US in fight against ISIS, US National Security Adviser Bolton says.https://www.nbcnews.com/news/mideast/no-syria-withdrawal-without-commitment-turkey-bolton-says-n955181 …,,president trump withdraw us troops northern syria turkish government guarantees won’t attack syrian kurdish forces critical allies us fight isis us national security adviser bolton,,1962,,604,,1546797427,,2019-01-06 12:57:07
@BreakingNews,,BreakingNews,,3 killed and 4 injured in shooting at Torrance, California, bowling alley. https://nbcnews.to/2FbMPrT  - @latimes,,3 killed 4 injured shooting torrance california bowling alley  latimes,,43,,58,,1546707999,,2019-01-05 12:06:39
@BreakingNews,,BreakingNews,,Marriott International says Friday that 5.25M unencrypted passport numbers were stolen as part of a data breach it disclosed in November.https://nbcnews.to/2FaGr4f ,,marriott international says friday 525m unencrypted passport numbers stolen part data breach disclosed,,95,,152,,1546643312,,2019-01-04 18:08:32
@BreakingNews,,BreakingNews,,US economy gains whopping 312,000 jobs in December. https://nbcnews.to/2F9gS3A  - @NBCNews,,us economy gains whopping 312000 jobs december  nbcnews,,192,,86,,1546626966,,2019-01-04 13:36:06
@BreakingNews,,BreakingNews,,Data and sensitive information from hundreds of German officials has been released online in what may be the result of a cyberattack, according to German officials.https://nbcnews.to/2CMoeby ,,data sensitive information hundreds german officials released online may result cyberattack according german,,70,,71,,1546625703,,2019-01-04 13:15:03
@BreakingNews,,BreakingNews,,116th US Congress convenes with a Democratic majority in the House, and the most diverse group of lawmakers ever with more than 100 women.https://nbcnews.to/2F5JaMh ,,116th us congress convenes democratic majority house diverse group lawmakers ever 100,,491,,130,,1546558636,,2019-01-03 18:37:16
@BreakingNews,,BreakingNews,,China reached a milestone in space exploration Thursday, landing a spacecraft on the far side of the moon, Chinese state media report. https://nbcnews.to/2CNj9A5  - @NYTimes,,china reached milestone space exploration thursday landing spacecraft far side moon chinese state media report  nytimes,,279,,142,,1546507270,,2019-01-03 04:21:10
@BreakingNews,,BreakingNews,,A NASA spacecraft on New Year's Day went farther than any spacecraft has gone before — 4 billion miles from Earth.https://nbcnews.to/2CIuAc1 ,,nasa spacecraft new years day went farther spacecraft gone — 4 billion miles,,396,,147,,1546380126,,2019-01-01 17:02:06
@BreakingNews,,BreakingNews,,US stocks conclude 2018 with the major stock indexes posting worst yearly performances since the 2008 financial crisis.https://nbcnews.to/2EZnguf ,,us stocks conclude 2018 major stock indexes posting worst yearly performances since 2008 financial,,178,,144,,1546310119,,2018-12-31 21:35:19
@CNNBrk,,CNNPolitics,,JUST IN: Acting Attorney General Matt Whitaker agrees to testify before the House Judiciary Committee https://cnn.it/2FETo6R pic.twitter.com/k3d2UudkQG,,in acting attorney general matt whitaker agrees testify house judiciary committee,,222,,82,,1547604797,,2019-01-15 21:13:17
@CNNBrk,,cnnbrk,,In a 424-1 vote, the House overwhelmingly rejects white supremacy and white nationalism after Rep. Steve King's racist comments https://cnn.it/2HbTNzJ pic.twitter.com/Zzz237JcCw,,4241 vote house overwhelmingly rejects white supremacy white nationalism rep steve kings racist comments,,928,,229,,1547605441,,2019-01-15 21:24:01
@CNNBrk,,cnnbrk,,British Prime Minister Theresa May will face a no-confidence vote on Wednesday after a crushing Brexit defeat. Follow live updates:https://cnn.it/2FyosVM ,,british prime minister theresa may face noconfidence vote wednesday crushing brexit defeat follow live,,372,,203,,1547600748,,2019-01-15 20:05:48
@CNNBrk,,cnnbrk,,A record number of UK lawmakers vote against Theresa May's Brexit deal, leaving no clear path forward to resolve the political messhttps://cnn.it/2FyosVM ,,record number uk lawmakers vote theresa mays brexit deal leaving clear path forward resolve political,,318,,213,,1547599536,,2019-01-15 19:45:36
@CNNBrk,,cnnbrk,,British lawmakers are now voting on the main Brexit agreement struck between British Prime Minister Theresa May and the EU. Watch live and follow updates: https://cnn.it/2FyosVM pic.twitter.com/im6MYcoRZ4,,british lawmakers voting main brexit agreement struck british prime minister theresa may eu watch live follow updates,,138,,73,,1547598627,,2019-01-15 19:30:27
@CNNBrk,,cnnbrk,,Kenyan security forces are battling to retake control of an upscale hotel and office complex in Nairobi after gunmen mounted a deadly assault on the compound https://cnn.it/2MbJY3R pic.twitter.com/s9TAJso2Le,,kenyan security forces battling retake control upscale hotel office complex nairobi gunmen mounted deadly assault compound,,160,,98,,1547597975,,2019-01-15 19:19:35
@CNNBrk,,cnnbrk,,President Trump is considering recognizing Venezuela's opposition leader as the legitimate president of the country, sources say http://cnn.it/2DchqUW pic.twitter.com/UWKyL0a3yz,,president trump considering recognizing venezuelas opposition leader legitimate president country sources say,,370,,151,,1547592034,,2019-01-15 17:40:34
@CNNBrk,,cnnbrk,,A federal judge strikes down the Trump administration's deeply contentious plan to reintroduce a citizenship question into the 2020 census https://cnn.it/2FACMNt pic.twitter.com/dq7N9bJOC3,,federal judge strikes trump administrations deeply contentious plan reintroduce citizenship question 2020 census,,992,,234,,1547583413,,2019-01-15 15:16:53
@CNNBrk,,cnnbrk,,People in Zimbabwe say they are not able to access Whatsapp, Facebook and other internet messaging services in wake of violent protests over fuel prices https://cnn.it/2AMVldX pic.twitter.com/HjjXZuM99U,,people zimbabwe say able access whatsapp facebook internet messaging services wake violent protests fuel prices,,697,,538,,1547582616,,2019-01-15 15:03:36
@CNNBrk,,CNNBusiness,,US markets opened little changed on Tuesday as investors wait for the Brexit vote in the United Kingdom. The Dow alternated between gains and losses. The S&P 500 gained 0.2%, while the Nasdaq rose 0.4%. Watch live https://cnn.it/2D9VpGq ,,us markets opened little changed tuesday investors wait brexit vote united kingdom dow alternated gains losses sp 500 gained 02 nasdaq rose 04 watch live,,73,,40,,1547580911,,2019-01-15 14:35:11
@CNNBrk,,cnnbrk,,Attorney general nominee William Barr's Senate confirmation hearing is under way. Follow live updates: https://cnn.it/2ANhYiy pic.twitter.com/i1P7jTam74,,attorney general nominee william barrs senate confirmation hearing way follow live updates,,182,,55,,1547581327,,2019-01-15 14:42:07
@CNNBrk,,cnnbrk,,Authorities in Nairobi, Kenya, are responding to a shooting in the area of the Dusit hotel, a police spokesman tells local news outlets https://cnn.it/2MbJY3R pic.twitter.com/9FVdJwnaUb,,authorities nairobi kenya responding shooting area dusit hotel police spokesman tells local news outlets,,220,,158,,1547578337,,2019-01-15 13:52:17
@CNNBrk,,cnnbrk,,Broadway legend Carol Channing, best known for her starring role in "Hello Dolly!," is dead at age 97 https://cnn.it/2QODJ6T pic.twitter.com/kLDRbi1N31,,broadway legend carol channing best known starring role hello dolly dead age 97,,734,,273,,1547575876,,2019-01-15 13:11:16
@CNNBrk,,cnnbrk,,Rep. Steve King has been stripped of committee assignments following recent racist comments he made, House Minority Leader Kevin McCarthy said https://cnn.it/2SPC42B pic.twitter.com/izk4MZatAC,,rep steve king stripped committee assignments following recent racist comments made house minority leader kevin mccarthy said,,2604,,530,,1547532540,,2019-01-15 01:09:00
@CNNBrk,,cnnbrk,,A river of chocolate blocked part of Interstate 40 near Flagstaff, Arizona, after a tanker hauling 40,000 pounds of liquid chocolate overturned. No one was hurt, but the state Department of Public Safety called it a "sweet cleanup." https://cnn.it/2SPXHzD pic.twitter.com/eVhXuZl9r7,,river chocolate blocked part interstate 40 near flagstaff arizona tanker hauling 40000 pounds liquid chocolate overturned one hurt state department public safety called sweet cleanup,,1627,,587,,1547531626,,2019-01-15 00:53:46
@CNNBrk,,cnnbrk,,Drug kingpin "El Chapo" Guzman spent the years after escaping prison hiding from authorities in the mountains of northwest Mexico with military grade weapons and constantly worrying about being caught, according to testimony from his "right-hand man" https://cnn.it/2SWDHLW pic.twitter.com/3YNMPKUKb6,,drug kingpin el chapo guzman spent years escaping prison hiding authorities mountains northwest mexico military grade weapons constantly worrying caught according testimony righthand man,,241,,86,,1547530254,,2019-01-15 00:30:54
@CNNBrk,,cnnbrk,,The President's team recently refused special counsel Mueller's request for an in-person interview to ask Trump follow-up questions https://cnn.it/2SZXyKp pic.twitter.com/dhbRABTYHO,,presidents team recently refused special counsel muellers request inperson interview ask trump followup questions,,754,,427,,1547529445,,2019-01-15 00:17:25
@CNNBrk,,CNNPolitics,,House Judiciary Chairman Jerry Nadler demands information from the Trump administration on family separations https://cnn.it/2D8GH2m pic.twitter.com/KhtntY97Gt,,house judiciary chairman jerry nadler demands information trump administration family separations,,412,,107,,1547527265,,2019-01-14 23:41:05
@CNNBrk,,cnnbrk,,A man who took hostages at a UPS facility in New Jersey was killed by police, officials say. Neither hostage was hurt. https://cnn.it/2STRjYh pic.twitter.com/1nOQLl89SA,,man took hostages ups facility new jersey killed police officials say neither hostage hurt,,310,,117,,1547524889,,2019-01-14 23:01:29
@CNNBrk,,cnnbrk,,Senate Majority Leader Mitch McConnell sharply condemned Rep. Steve King and said that if King "doesn't understand why 'white supremacy' is offensive, he should find another line of work" https://cnn.it/2SPC42B pic.twitter.com/cFKtnpGeRV,,senate majority leader mitch mcconnell sharply condemned rep steve king said king doesnt understand white supremacy offensive find another line work,,1492,,303,,1547522905,,2019-01-14 22:28:25
@CNNBrk,,cnnbrk,,Judge sets bail at $5 million for man suspected of kidnapping Jayme Closs and killing her parents https://cnn.it/2SPH9YG pic.twitter.com/VCd5nENm3U,,judge sets bail 5 million man suspected kidnapping jayme closs killing parents,,403,,114,,1547520925,,2019-01-14 21:55:25
@CNNBrk,,cnnbrk,,Suspect confesses to kidnapping Jayme Closs and killing her parents, and says he decided to target her after seeing her get on a school bus, a court filing states https://cnn.it/2SPH9YG pic.twitter.com/w7NhWYuipP,,suspect confesses kidnapping jayme closs killing parents says decided target seeing get school bus court filing states,,535,,323,,1547516815,,2019-01-14 20:46:55
@CNNBrk,,cnnbrk,,Florida Rep. Alcee Hastings says he is being treated for pancreatic cancer and plans to stay in Congress during treatment https://cnn.it/2SSw359 pic.twitter.com/wmMQQEmhX6,,florida rep alcee hastings says treated pancreatic cancer plans stay congress treatment,,170,,54,,1547515639,,2019-01-14 20:27:19
@CNNBrk,,cnnbrk,,Police are responding to a possible active shooting at a UPS facility in New Jersey, the company says https://cnn.it/2D8Z9bb pic.twitter.com/fNGcPbKQ5A,,police responding possible active shooting ups facility new jersey company says,,288,,308,,1547497777,,2019-01-14 15:29:37
@CNNBrk,,cnnbrk,,A Polish mayor dies one day after being stabbed by a man who rushed on stage during a charity event https://cnn.it/2RLNgQr pic.twitter.com/wBkg1I6CUD,,polish mayor dies one day stabbed man rushed stage charity event,,296,,221,,1547493461,,2019-01-14 14:17:41
@CNNBrk,,CNNPolitics,,Transcripts show the FBI discussed whether Trump followed Russia's directions as well as whether he acted completely within his authority https://cnn.it/2FwPRXV pic.twitter.com/j8TZ61a1Ky,,transcripts show fbi discussed whether trump followed russias directions well whether acted completely within authority,,849,,366,,1547482885,,2019-01-14 11:21:25
@CNNBrk,,cnnbrk,,Embattled utility PG&E, facing potentially billions of dollars in liability over California's deadly wildfires last year, says CEO Geisha Williams has stepped down https://cnn.it/2SXyFis pic.twitter.com/pDaEqPfa0P,,embattled utility pge facing potentially billions dollars liability californias deadly wildfires last year says ceo geisha williams stepped,,311,,139,,1547454182,,2019-01-14 03:23:02
@CNNBrk,,cnnbrk,,A federal judge stops, in some states, the Trump administration's weakening of Obamacare rules that force insurance companies to cover contraceptives https://cnn.it/2ALgYeE pic.twitter.com/OAdoyFH4Ka,,federal judge stops states trump administrations weakening obamacare rules force insurance companies cover contraceptives,,905,,224,,1547446880,,2019-01-14 01:21:20
@CNNBrk,,cnnbrk,,After months of speculation, the NFL announced that Maroon 5, Big Boi and Travis Scott would perform at the Super Bowl halftime show next month https://cnn.it/2AL60Ww pic.twitter.com/Am5L95VODx,,months speculation nfl announced maroon 5 big boi travis scott would perform super bowl halftime show next month,,1246,,273,,1547435425,,2019-01-13 22:10:25
@CNNBrk,,cnnbrk,,12 people were arrested in Costa Rica and Spain in connection with the kidnapping of a US businessman in Costa Rica in September, officials say. The victim's family paid a ransom, but he is still missing. https://cnn.it/2AJ7BMq pic.twitter.com/8g0ZYyMsBY,,12 people arrested costa rica spain connection kidnapping us businessman costa rica september officials say victims family paid ransom still missing,,301,,160,,1547434191,,2019-01-13 21:49:51
@CNNBrk,,cnnbrk,,"Action will be taken" against Rep. Steve King after his recent comment about white supremacy, House minority leader Kevin McCarthy said. What kind of action? McCarthy didn't say. https://cnn.it/2SS7pBQ pic.twitter.com/CuIs2KG9kt,,action taken rep steve king recent comment white supremacy house minority leader kevin mccarthy said kind action mccarthy say,,943,,222,,1547419413,,2019-01-13 17:43:33
@CNNBrk,,cnnbrk,,The White House's National Security Council asked the Pentagon last year for plans for launching a military attack against Iran, the Wall Street Journal reports https://cnn.it/2ClGO9d pic.twitter.com/Uy24463ah1,,white houses national security council asked pentagon last year plans launching military attack iran wall street journal reports,,506,,294,,1547409364,,2019-01-13 14:56:04
@CNNBrk,,cnnbrk,,A mass drug overdose at a home in Chico, California, has killed one person and sent more than a dozen people to hospitals, police say https://cnn.it/2Fyx6mS pic.twitter.com/sMLX6jQiRX,,mass drug overdose home chico california killed one person sent dozen people hospitals police say,,369,,190,,1547403444,,2019-01-13 13:17:24
@CNNBrk,,cnnbrk,,Investigators believe the man accused of kidnapping Jayme Closs killed her parents to clear the way for him to abduct her, sheriff says https://cnn.it/2Fuv72Z pic.twitter.com/VnsnaaMIy9,,investigators believe man accused kidnapping jayme closs killed parents clear way abduct her sheriff says,,453,,169,,1547358809,,2019-01-13 00:53:29
@CNNBrk,,cnnbrk,,Missy Elliott becomes the first female hip-hop artist to be inducted into the Songwriters Hall of Fame https://cnn.it/2H5rhzQ pic.twitter.com/p3m8f7tkER,,missy elliott becomes first female hiphop artist inducted songwriters hall fame,,4683,,813,,1547357708,,2019-01-13 00:35:08
@CNNBrk,,cnnbrk,,Walter V. Shipley, the architect of several bank mega mergers that reshaped the industry, has died. He was 83. https://cnn.it/2CeHXPM pic.twitter.com/WrJRE4rPAi,,walter v shipley architect several bank mega mergers reshaped industry died 83,,170,,61,,1547354526,,2019-01-12 23:42:06
@CNNBrk,,cnnbrk,,Congressional Black Caucus calls for removal of Rep. Steve King from committee assignments https://cnn.it/2HcIPKr pic.twitter.com/g4eLnTEezH,,congressional black caucus calls removal rep steve king committee assignments,,2675,,644,,1547351819,,2019-01-12 22:56:59
@CNNBrk,,cnnbrk,,Attackers killed five people at a police station in Herat, Afghanistan, police say https://cnn.it/2SPs1KY pic.twitter.com/jNPlz9avWr,,attackers killed five people police station herat afghanistan police say,,167,,93,,1547349369,,2019-01-12 22:16:09
@CNNBrk,,cnnbrk,,Secretary of State Mike Pompeo will meet with Saudi Crown Prince Mohammed bin Salman and plans to address the killing of journalist Jamal Khashoggi https://cnn.it/2Che29z pic.twitter.com/L60BIA7L4T,,secretary state mike pompeo meet saudi crown prince mohammed bin salman plans address killing journalist jamal khashoggi,,349,,145,,1547346406,,2019-01-12 21:26:46
@CNNBrk,,cnnbrk,,The TSA is paying agents who came in the day after the partial government shutdown began for a day's work and awarding $500 bonuses for work during the holiday travel season https://cnn.it/2Hardz3 pic.twitter.com/D5muipYsJQ,,tsa paying agents came day partial government shutdown began days work awarding 500 bonuses work holiday travel season,,710,,161,,1547343150,,2019-01-12 20:32:30
@CNNBrk,,cnnbrk,,A Saudi teen who fled to Thailand to escape her allegedly abusive family has arrived in Canada after being offered asylum https://cnn.it/2snjpiY pic.twitter.com/sJGVMffV5F,,saudi teen fled thailand escape allegedly abusive family arrived canada offered asylum,,3737,,565,,1547328740,,2019-01-12 16:32:20
@CNNBrk,,cnnbrk,,Alexandria Ocasio-Cortez's campaign was fined by New York for not having workers' compensation coverage for a month https://cnn.it/2SRdbUb pic.twitter.com/x5lKcxP87I,,alexandria ocasiocortezs campaign fined new york workers compensation coverage month,,1262,,481,,1547328188,,2019-01-12 16:23:08
@CNNBrk,,cnnbrk,,At the same time the FBI opened a probe into President Trump for possible obstruction of justice after he fired FBI Dir. James Comey, counterintelligence agents were investigating why Trump was acting in ways that seemed to benefit Russia, a source says https://cnn.it/2AIR0bG pic.twitter.com/d08QG22xzG,,time fbi opened probe president trump possible obstruction justice fired fbi dir james comey counterintelligence agents investigating trump acting ways seemed benefit russia source says,,3290,,1003,,1547282960,,2019-01-12 03:49:20
@CNNBrk,,cnnbrk,,Megyn Kelly is leaving NBC two years after signing with the network amid much fanfare. She'll get the remaining part of her $69 million contract, two sources said. https://cnn.it/2SO6eTV pic.twitter.com/WijGtSFFaj,,megyn kelly leaving nbc two years signing network amid much fanfare shell get remaining part 69 million contract two sources said,,668,,226,,1547278266,,2019-01-12 02:31:06
@CNNBrk,,cnnbrk,,A woman whose husband is a federal worker furloughed in the government shutdown won $100,000 and an SUV in a Virginia lottery game https://cnn.it/2SPXbSu pic.twitter.com/ehrWnL5J5V,,woman whose husband federal worker furloughed government shutdown 100000 suv virginia lottery game,,7188,,1162,,1547277175,,2019-01-12 02:12:55
@CNNBrk,,cnnbrk,,SpaceX, Elon Musk's rocket company, says it is laying off 10% of its 6,000-person workforce as it tackles two hugely expensive projects https://cnn.it/2ADMaMU pic.twitter.com/wwn3TBeqHS,,spacex elon musks rocket company says laying 10 6000person workforce tackles two hugely expensive projects,,295,,124,,1547273778,,2019-01-12 01:16:18
@CNNBrk,,cnnbrk,,A double-decker bus crashed in Ottawa, Ontario, killing three people and injuring at least 20, Mayor Jim Watson said https://cnn.it/2SWTN88 pic.twitter.com/Mj6blhhQCs,,doubledecker bus crashed ottawa ontario killing three people injuring least 20 mayor jim watson said,,147,,107,,1547270961,,2019-01-12 00:29:21
@CNNBrk,,cnnbrk,,Rep. Tulsi Gabbard, a Democrat from Hawaii and the first Hindu member of Congress, says she's running for President in 2020 https://cnn.it/2AGQdIa pic.twitter.com/bbqWY5uScr,,rep tulsi gabbard democrat hawaii first hindu member congress says running president 2020,,3571,,1015,,1547267500,,2019-01-11 23:31:40
@CNNBrk,,cnnbrk,,Florida governor suspends the Florida sheriff, Scott Israel, whose Broward County office responded to last year's Parkland massacre https://cnn.it/2TIFxzQ pic.twitter.com/EeFBSXpmFe,,florida governor suspends florida sheriff scott israel whose broward county office responded last years parkland massacre,,513,,130,,1547263746,,2019-01-11 22:29:06
@CNNBrk,,CNNPolitics,,President Trump says you can call his wall "peaches" for all he cares https://cnn.it/2Fu0w5Y pic.twitter.com/N6snjVbsoV,,president trump says call wall peaches cares,,586,,132,,1547261836,,2019-01-11 21:57:16
@CNNBrk,,CNNBusiness,,The Dow climbed more than 2% on the week despite closing slightly lower on Friday. The S&P 500 also advanced 2.5% on the week, while the Nasdaq surged 3.4%. https://cnn.it/2D3K8qW ,,dow climbed 2 week despite closing slightly lower friday sp 500 also advanced 25 week nasdaq surged 34,,155,,53,,1547259158,,2019-01-11 21:12:38
@CNNBrk,,cnnbrk,,President Trump says he is still open to declaring a national emergency over immigration at the southern border, but made clear he would "rather not," calling it an "easy way out" https://cnn.it/2FpzJrj pic.twitter.com/WO0v4yFAsz,,president trump says still open declaring national emergency immigration southern border made clear would rather not calling easy way out,,270,,87,,1547258714,,2019-01-11 21:05:14
@CNNBrk,,cnnbrk,,Justice Ruth Bader Ginsburg shows "no evidence of remaining disease" after cancer surgery but will miss oral arguments next week, the Supreme Court says https://cnn.it/2Fpm3xt pic.twitter.com/XQOvkd9oVt,,justice ruth bader ginsburg shows no evidence remaining disease cancer surgery miss oral arguments next week supreme court says,,1939,,257,,1547249142,,2019-01-11 18:25:42
@CNNBrk,,cnnbrk,,Authorities say 21-year-old Jake Thomas Patterson faces charges in the case of Jayme Closs, the Wisconsin girl found alive months after her parents were killed https://cnn.it/2D2XeEN pic.twitter.com/lLoKDZ0MYY,,authorities say 21yearold jake thomas patterson faces charges case jayme closs wisconsin girl found alive months parents killed,,608,,287,,1547243575,,2019-01-11 16:52:55
@CNNBrk,,cnnbrk,,Authorities give an update on Jayme Closs, a 13-year-old Wisconsin girl found alive months after her parents were found dead. Follow developments:https://cnn.it/2D2XeEN ,,authorities give update jayme closs 13yearold wisconsin girl found alive months parents found dead follow,,1017,,262,,1547240406,,2019-01-11 16:00:06
@CNNBrk,,cnnbrk,,A female rookie police officer was shot dead in California, the second killed in the last two days in the United States. https://cnn.it/2H7N1Lp pic.twitter.com/qERiPt9DMR,,female rookie police officer shot dead california second killed last two days united states,,480,,334,,1547239359,,2019-01-11 15:42:39
@CNNBrk,,cnnbrk,,Thailand's immigration police chief initially said the Saudi woman was offered asylum by Australia and Canada, but he later requested that statement be retracted. This story has been updated:https://cnn.it/2RL9Rg0 ,,thailands immigration police chief initially said saudi woman offered asylum australia canada later requested statement retracted story,,188,,69,,1547233554,,2019-01-11 14:05:54
@CNNBrk,,cnnbrk,,Rahaf Mohammed al-Qunun, the 18-year-old Saudi woman who fled to Thailand to escape her allegedly abusive family, has been granted asylum in Australia, a Thai immigration official sayshttps://cnn.it/2CflDWl ,,rahaf mohammed alqunun 18yearold saudi woman fled thailand escape allegedly abusive family granted asylum australia thai immigration official,,3013,,601,,1547210361,,2019-01-11 07:39:21
@CNNBrk,,cnnbrk,,Jayme Closs, the Wisconsin teen who vanished after her parents were killed, has been found alive nearly 3 months later, authorities say https://cnn.it/2H5iM83 pic.twitter.com/pbn8oR0k1a,,jayme closs wisconsin teen vanished parents killed found alive nearly 3 months later authorities say,,3128,,808,,1547193361,,2019-01-11 02:56:01
@CNNBrk,,cnnbrk,,US begins withdrawing some military equipment from Syria https://cnn.it/2H6xGe3 pic.twitter.com/7oPcyCUB6V,,us begins withdrawing military equipment syria,,267,,117,,1547183638,,2019-01-11 00:13:58
@CNNBrk,,cnnbrk,,Border wall funds could be diverted from a pool meant for Puerto Rico, Texas and other areas hit by disasters if Trump declares a national emergency https://cnn.it/2RI7LO3 pic.twitter.com/rmKWEMahr9,,border wall funds could diverted pool meant puerto rico texas areas hit disasters trump declares national emergency,,1121,,971,,1547179865,,2019-01-10 23:11:05
@CNNBrk,,cnnbrk,,House passes bills to reopen the Agriculture and Transportation departments https://cnn.it/2RA2g43 pic.twitter.com/4VbGNBJFCG,,house passes bills reopen agriculture transportation departments,,661,,168,,1547178371,,2019-01-10 22:46:11
@CNNBrk,,cnnbrk,,As Mueller wraps up his probe, investigators focus on conflicting Trump statements that could be seen as an effort to obstruct justice, sources say https://cnn.it/2RF824h pic.twitter.com/MyYQ3kmTVx,,mueller wraps probe investigators focus conflicting trump statements could seen effort obstruct justice sources say,,866,,249,,1547176025,,2019-01-10 22:07:05
@CNNBrk,,cnnbrk,,Ex-Trump lawyer Michael Cohen has agreed to testify publicly before Congress, a major first move from House Democrats investigating the President https://cnn.it/2VG8A9a pic.twitter.com/hyWFKDa7Qe,,extrump lawyer michael cohen agreed testify publicly congress major first move house democrats investigating president,,3269,,898,,1547169640,,2019-01-10 20:20:40
@CNNBrk,,cnnbrk,,President Trump is headed to McAllen, Texas, to visit the southern border, as he continues to push for his long-promised wall amid the shutdown. Follow live updates: https://cnn.it/2FoWlZ1 pic.twitter.com/f6VYgXSbVr,,president trump headed mcallen texas visit southern border continues push longpromised wall amid shutdown follow live updates,,389,,92,,1547163051,,2019-01-10 18:30:51
@CNNBrk,,cnnbrk,,Hours before 32,000 educators were set to walk off the job, the Los Angeles teachers' union postponed its strike from Thursday to Monday https://cnn.it/2stIngV pic.twitter.com/avZ9DD1yHs,,hours 32000 educators set walk job los angeles teachers union postponed strike thursday monday,,175,,69,,1547158109,,2019-01-10 17:08:29
@CNNBrk,,cnnbrk,,President Trump says he has an "absolute right" to declare a national emergency at the border, but hasn't yet because "I would like to do the deal through Congress." Follow live updates: https://cnn.it/2TGdcu9 pic.twitter.com/QSFoyS42kX,,president trump says absolute right declare national emergency border yet i would like deal congress follow live updates,,389,,109,,1547151710,,2019-01-10 15:21:50
@CNNBrk,,cnnbrk,,Ex-Nissan chairman Carlos Ghosn has fallen ill with a fever and is receiving medical attention at the Tokyo jail where he's been held for nearly two months, his representatives say https://cnn.it/2RBnHBG pic.twitter.com/rvaZiwOMUZ,,exnissan chairman carlos ghosn fallen ill fever receiving medical attention tokyo jail hes held nearly two months representatives say,,158,,87,,1547150063,,2019-01-10 14:54:23
@CNNBrk,,cnnbrk,,A female police officer has died after being shot outside a home as she prepared to start her shift in Shreveport, Louisiana, officials say https://cnn.it/2Hi1vJ1 pic.twitter.com/Bf5HqINgA2,,female police officer died shot outside home prepared start shift shreveport louisiana officials say,,261,,217,,1547143724,,2019-01-10 13:08:44
@CNNBrk,,cnnbrk,,The Duchess of Sussex is to become the patron of four charities supporting vulnerable women, education, the arts and animals, Kensington Palace announcedhttps://cnn.it/2SHnsSY ,,duchess sussex become patron four charities supporting vulnerable women education arts animals kensington palace,,960,,174,,1547134991,,2019-01-10 10:43:11
@CNNBrk,,cnnbrk,,Opposition candidate Felix Tshisekedi wins the Democratic Republic of Congo's presidential election https://cnn.it/2REa6cD pic.twitter.com/4XX6k2tYSe,,opposition candidate felix tshisekedi wins democratic republic congos presidential election,,741,,392,,1547108205,,2019-01-10 03:16:45
@CNNBrk,,cnnbrk,,An ex-commander at US Naval Station Guantanamo Bay, Cuba, is charged with obstruction of justice, concealment, falsifying records and making false statements in a civilian worker's death probe https://cnn.it/2RGDvDd pic.twitter.com/kEK9Qd41Pj,,excommander us naval station guantanamo bay cuba charged obstruction justice concealment falsifying records making false statements civilian workers death probe,,376,,194,,1547107635,,2019-01-10 03:07:15
@CNNBrk,,cnnbrk,,NBA star Enes Kanter says he "can go anywhere in the world," but doesn't feel safe anywhere "besides America" https://cnn.it/2H3wFn3 pic.twitter.com/l9OHeByFtj,,nba star enes kanter says can go anywhere world feel safe anywhere besides america,,740,,278,,1547099991,,2019-01-10 00:59:51
@CNNBrk,,cnnbrk,,The US Coast Guard took down a tip sheet that suggested furloughed employees have garage sales and baby-sit during the partial government shutdown https://cnn.it/2Hh62eL pic.twitter.com/agjqNuBbHx,,us coast guard took tip sheet suggested furloughed employees garage sales babysit partial government shutdown,,997,,724,,1547098753,,2019-01-10 00:39:13
@CNNBrk,,CNNPolitics,,Paul Manafort intended for polling data to go to two Ukrainian oligarchs who owed him millions https://cnn.it/2CZrDUy pic.twitter.com/ZexGCE6kaC,,paul manafort intended polling data go two ukrainian oligarchs owed millions,,389,,200,,1547094269,,2019-01-09 23:24:29
@CNNBrk,,cnnbrk,,The E. coli outbreak linked to romaine lettuce from some regions of Northern and Central California appears to be over, the CDC says https://cnn.it/2H2ciqA pic.twitter.com/pqC1HijPja,,e coli outbreak linked romaine lettuce regions northern central california appears over cdc says,,328,,161,,1547093232,,2019-01-09 23:07:12
@CNNBrk,,cnnbrk,,Homeless man in GoFundMe case arrested after failing to appear in court https://cnn.it/2RIpYe8 pic.twitter.com/oGpw4H9qsI,,homeless man gofundme case arrested failing appear court,,322,,90,,1547089881,,2019-01-09 22:11:21
@CNNBrk,,cnnbrk,,Billionaire Tom Steyer won't run for president in 2020, his spokeswoman tells CNN https://cnn.it/2REbRXj pic.twitter.com/SpGteSHrEp,,billionaire tom steyer run president 2020 spokeswoman tells cnn,,295,,73,,1547088234,,2019-01-09 21:43:54
@CNNBrk,,cnnbrk,,Trump walked out of a Situation Room meeting with Democrats. The President says it was "a total waste of time." https://cnn.it/2H4GAZw pic.twitter.com/ht7dIVvzHo,,trump walked situation room meeting democrats president says a total waste time,,1071,,355,,1547085073,,2019-01-09 20:51:13
@CNNBrk,,CNNPolitics,,Law firm that represented Russian interests is part of mystery Mueller subpoena case https://cnn.it/2FleHdf pic.twitter.com/iFwkmqdrtP,,law firm represented russian interests part mystery mueller subpoena case,,318,,138,,1547077016,,2019-01-09 18:36:56
@CNNBrk,,cnnbrk,,Trump calls border wall a "medieval solution" that works. He signals openness to broader immigration deal and also suggests he may use executive authority to secure funds. https://cnn.it/2RgvOEm pic.twitter.com/sGiqGhDMoo,,trump calls border wall medieval solution works signals openness broader immigration deal also suggests may use executive authority secure funds,,346,,108,,1547076975,,2019-01-09 18:36:15
@CNNBrk,,cnnbrk,,Kevin Hart puts the question to rest as to whether he'll host the Oscars after all, saying, "I'm over it" https://cnn.it/2QzUClq pic.twitter.com/0ae6MD8sHm,,kevin hart puts question rest whether hell host oscars all saying im it,,338,,63,,1547071194,,2019-01-09 16:59:54
@CNNBrk,,cnnbrk,,At least three people were stabbed as a rally for Nigeria's ruling party descended into chaos, police say https://cnn.it/2H3Z24v pic.twitter.com/ANGU2Y1DG5,,least three people stabbed rally nigerias ruling party descended chaos police say,,135,,86,,1547069364,,2019-01-09 16:29:24
@CNNBrk,,cnnbrk,,The world's richest couple is splitting up. Amazon CEO Jeff Bezos and his wife, novelist MacKenzie Bezos, say they are getting a divorce after 25 years of marriage. https://cnn.it/2Fh8IXJ pic.twitter.com/skpskBE2aD,,worlds richest couple splitting up amazon ceo jeff bezos wife novelist mackenzie bezos say getting divorce 25 years marriage,,1328,,693,,1547066434,,2019-01-09 15:40:34
@CNNBrk,,CNNBusiness,,The Dow climbed 125 points at Wednesday’s opening bell as Wall Street continues to recover from a brutal December. The S&P 500 gained 0.3%, leaving the index on track for its first four-day win streak since September. Watch live https://cnn.it/2Fp0IDv ,,dow climbed 125 points wednesday’s opening bell wall street continues recover brutal december sp 500 gained 03 leaving index track first fourday win streak since september watch live,,176,,62,,1547062628,,2019-01-09 14:37:08
@CNNBrk,,CNNPolitics,,Deputy Attorney General Rod Rosenstein is planning to leave the Justice Department shortly after William Barr, the President's nominee for attorney general, is confirmed, according to a source https://cnn.it/2FivGNs pic.twitter.com/TPJLZlqnnA,,deputy attorney general rod rosenstein planning leave justice department shortly william barr presidents nominee attorney general confirmed according source,,453,,263,,1547051263,,2019-01-09 11:27:43
@CNNBrk,,cnnbrk,,Democratic leaders, speaking moments after President Trump's prime-time address, called on him to separate his case for a border wall from funding the federal government https://cnn.it/2AEq4tA pic.twitter.com/NJ3CAFCZzr,,democratic leaders speaking moments president trumps primetime address called separate case border wall funding federal government,,1534,,313,,1547019422,,2019-01-09 02:37:02
@CNNBrk,,cnnbrk,,President Trump put the onus of an 18-day partial government shutdown on Democrats, saying the matter could be easily resolved if they cede to his border funding demands https://cnn.it/2C8RTKy pic.twitter.com/N6Bo03Fhme,,president trump put onus 18day partial government shutdown democrats saying matter could easily resolved cede border funding demands,,555,,139,,1547018349,,2019-01-09 02:19:09
@CNNBrk,,cnnbrk,,Democratic leaders Nancy Pelosi and Chuck Schumer deliver a response to President Trump's address. Follow live updates: https://cnn.it/2C8RTKy pic.twitter.com/KQEkXMq9DK,,democratic leaders nancy pelosi chuck schumer deliver response president trumps address follow live updates,,629,,114,,1547018072,,2019-01-09 02:14:32
@CNNBrk,,cnnbrk,,President Trump will give a prime-time address to make his case for wall funding. Follow live updates https://cnn.it/2C8RTKy pic.twitter.com/GGFfO8evMy,,president trump give primetime address make case wall funding follow live updates,,233,,55,,1547016641,,2019-01-09 01:50:41
@CNNBrk,,cnnbrk,,The NYPD has closed its two investigations into sexual misconduct allegations against celebrity chef Mario Batali, an official tells CNN https://cnn.it/2H0UuMr pic.twitter.com/vcfkDSHKrC,,nypd closed two investigations sexual misconduct allegations celebrity chef mario batali official tells cnn,,178,,78,,1547013136,,2019-01-09 00:52:16
@CNNBrk,,cnnbrk,,The US Department of Agriculture says it will continue providing food stamps to millions of Americans through February as a partial government shutdown continues https://cnn.it/2C4Xwt6 pic.twitter.com/VkKkxJot5Q,,us department agriculture says continue providing food stamps millions americans february partial government shutdown continues,,469,,182,,1547010609,,2019-01-09 00:10:09
@CNNBrk,,cnnbrk,,R. Kelly could face an investigation in Georgia after a Lifetime documentary aired that chronicled allegations of abuse, predatory behavior and pedophilia https://cnn.it/2RK1amp pic.twitter.com/bLpb6i1Gmq,,r kelly could face investigation georgia lifetime documentary aired chronicled allegations abuse predatory behavior pedophilia,,1350,,430,,1547006233,,2019-01-08 22:57:13
@CNNBrk,,cnnbrk,,An internal email by a high-ranking TSA official warns employees who don't show up to work unpaid at a California airport will be deemed AWOL and may face disciplinary action https://cnn.it/2RDQJAD pic.twitter.com/Z1LS9gM28Z,,internal email highranking tsa official warns employees show work unpaid california airport deemed awol may face disciplinary action,,467,,304,,1547005073,,2019-01-08 22:37:53
@CNNBrk,,cnnbrk,,A second suspect will be charged with capital murder in connection with a 7-year-old's drive-by shooting death, authorities say https://cnn.it/2RBBojR pic.twitter.com/asTY68Hf7F,,second suspect charged capital murder connection 7yearolds driveby shooting death authorities say,,471,,115,,1547001190,,2019-01-08 21:33:10
@CNNBrk,,cnnbrk,,The US Supreme Court says an unnamed foreign government-owned company must pay fines while it challenges a Mueller-related subpoena https://cnn.it/2RFfsVg pic.twitter.com/VLPYR6Qv2i,,us supreme court says unnamed foreign governmentowned company must pay fines challenges muellerrelated subpoena,,524,,136,,1546999728,,2019-01-08 21:08:48
@CNNBrk,,cnnbrk,,A court filing reveals that Robert Mueller believes Paul Manafort fed information to a Russian with intelligence ties while he ran Trump's campaign https://cnn.it/2RBNedR pic.twitter.com/fgP7FKSknl,,court filing reveals robert mueller believes paul manafort fed information russian intelligence ties ran trumps campaign,,1402,,550,,1546996244,,2019-01-08 20:10:44
@CNNBrk,,cnnbrk,,Sears tells a bankruptcy court it has accepted a revised bid from a hedge fund that gives it a chance to avoid shutting down https://cnn.it/2FmshgJ pic.twitter.com/tVcp433q3P,,sears tells bankruptcy court accepted revised bid hedge fund gives chance avoid shutting,,494,,237,,1546990984,,2019-01-08 18:43:04
@CNNBrk,,cnnbrk,,Democratic leaders Nancy Pelosi and Chuck Schumer will speak tonight after President Trump makes his case for money for a border wall. Follow live updates: https://cnn.it/2HbeETM pic.twitter.com/ErVHSdH5pB,,democratic leaders nancy pelosi chuck schumer speak tonight president trump makes case money border wall follow live updates,,1818,,455,,1546981016,,2019-01-08 15:56:56
@CNNBrk,,cnnbrk,,The rate of cancer deaths in the US has hit a 25-year decline, a new study says. But there is one potentially troubling trend. https://cnn.it/2FgoZwd pic.twitter.com/C3EBTuhnAf,,rate cancer deaths us hit 25year decline new study says one potentially troubling trend,,541,,202,,1546978458,,2019-01-08 15:14:18
@CNNBrk,,cnnbrk,,A 20-year-old man has confessed to a cyberattack that affected thousands of people in Germany, including hundreds of politicians and public figures, a federal prosecutor says https://cnn.it/2TvmGs2 pic.twitter.com/DRTg6b8ST3,,20yearold man confessed cyberattack affected thousands people germany including hundreds politicians public figures federal prosecutor says,,349,,203,,1546976433,,2019-01-08 14:40:33
@CNNBrk,,CNNBusiness,,The Dow climbed 300 points, or 1.3%, at Tuesday’s opening bell on hopes for progress on a trade deal with China. The S&P 500 jumped 1.1%, leaving both indexes on track for their first three-day winning streak since late November. Watch live https://cnn.it/2CY8NgF ,,dow climbed 300 points 13 tuesday’s opening bell hopes progress trade deal china sp 500 jumped 11 leaving indexes track first threeday winning streak since late november watch live,,144,,44,,1546976230,,2019-01-08 14:37:10
@CNNBrk,,cnnbrk,,The Clemson Tigers are national champions for a third time after defeating the Alabama Crimson Tide 44-16 in the College Football Playoff National Championship Game. https://cnn.it/2TurFt0 pic.twitter.com/gHhWG0Urpl,,clemson tigers national champions third time defeating alabama crimson tide 4416 college football playoff national championship game,,1130,,231,,1546941551,,2019-01-08 04:59:11
@CNNBrk,,cnnbrk,,Former Nissan chairman Carlos Ghosn appeared in court in Tokyo in handcuffs, his first time in public since his arrest seven weeks ago on suspicion of financial misconduct https://cnn.it/2AA9US1 pic.twitter.com/jdn3CPX7HX,,former nissan chairman carlos ghosn appeared court tokyo handcuffs first time public since arrest seven weeks ago suspicion financial misconduct,,205,,96,,1546933294,,2019-01-08 02:41:34
@CNNBrk,,CNNPolitics,,Millions of low-income Americans could have a harder time affording food if the partial government shutdown continues into February https://cnn.it/2Fho8dR pic.twitter.com/kTN8s43tIQ,,millions lowincome americans could harder time affording food partial government shutdown continues february,,337,,183,,1546924383,,2019-01-08 00:13:03
@CNNBrk,,cnnbrk,,At least 24 Native Americans, most of them women, went missing in sparsely populated Montana in 2018, says Sen. Jon Tester, who wants to push the Justice Department to take action  https://cnn.it/2ACgyav pic.twitter.com/UmSHPASxxE,,least 24 native americans women went missing sparsely populated montana 2018 says sen jon tester wants push justice department take action,,1774,,842,,1546925548,,2019-01-08 00:32:28
@CNNBrk,,cnnbrk,,TESS, NASA's planet-hunting telescope that began surveying the sky in July, has found an exoplanet three times the size of Earth just 53 light years away, as well as two other exoplanets https://cnn.it/2SCQJOx pic.twitter.com/SsRZX50xr7,,tess nasas planethunting telescope began surveying sky july found exoplanet three times size earth 53 light years away well two exoplanets,,858,,306,,1546922542,,2019-01-07 23:42:22
@CNNBrk,,cnnbrk,,Police say they've arrested someone in connection with Friday's deadly shooting at a bowling alley in Torrance, California https://cnn.it/2SGXzm5 pic.twitter.com/0tduALlbx0,,police say theyve arrested someone connection fridays deadly shooting bowling alley torrance california,,283,,80,,1546922251,,2019-01-07 23:37:31
@CNNBrk,,cnnbrk,,Seven people have died in national parks since the shutdown began more than 2 weeks ago. That's actually less than average. https://cnn.it/2AvQQEw pic.twitter.com/dpX55ZF3Wy,,seven people died national parks since shutdown began 2 weeks ago thats actually less average,,503,,219,,1546917940,,2019-01-07 22:25:40
@CNNBrk,,CNNPolitics,,The Trump-Russia dossier: What's right, wrong and still unclear? https://cnn.it/2FftJkJ pic.twitter.com/BrZXWyVvBE,,trumprussia dossier whats right wrong still unclear,,178,,69,,1546913011,,2019-01-07 21:03:31
@CNNBrk,,cnnbrk,,A former Uber driver pleaded guilty to killing six people during a 2016 shooting spree in Kalamazoo, Michigan https://cnn.it/2AtBOPJ pic.twitter.com/JczZhSRzS2,,former uber driver pleaded guilty killing six people 2016 shooting spree kalamazoo michigan,,244,,191,,1546912431,,2019-01-07 20:53:51
@CNNBrk,,cnnbrk,,President Trump says he will address the nation at 9 p.m. ET Tuesday on "the Humanitarian and National Security crisis on our Southern Border" https://cnn.it/2GSft3W pic.twitter.com/cMcgOmeGOR,,president trump says address nation 9 pm et tuesday the humanitarian national security crisis southern border,,464,,141,,1546906439,,2019-01-07 19:13:59
@CNNBrk,,cnnbrk,,Texas judge rules Eric Black Jr., the suspected driver in the shooting death of 7-year-old Jazmine Barnes, to be held without bail https://cnn.it/2RdonxF pic.twitter.com/aH2cZR2nvw,,texas judge rules eric black jr suspected driver shooting death 7yearold jazmine barnes held without bail,,517,,154,,1546903962,,2019-01-07 18:32:42
@CNNBrk,,cnnbrk,,A suspect has been arrested in the shooting death of a man who was camping with his daughters in a California park last year. Prosecutors say the suspect has shot at numerous unsuspecting campers and motorists in recent years. https://cnn.it/2AB4ZR0 pic.twitter.com/mmL3UBtwbn,,suspect arrested shooting death man camping daughters california park last year prosecutors say suspect shot numerous unsuspecting campers motorists recent years,,413,,179,,1546903646,,2019-01-07 18:27:26
@CNNBrk,,cnnbrk,,Tennessee governor grants clemency to Cyntoia Brown, a woman sentenced to life after killing the man who bought her for sex at age 16 https://cnn.it/2Ayp9La pic.twitter.com/GTaCOKb2Hc,,tennessee governor grants clemency cyntoia brown woman sentenced life killing man bought sex age 16,,10942,,3240,,1546902486,,2019-01-07 18:08:06
@CNNBrk,,cnnbrk,,A plea of not guilty was entered on Kevin Spacey's behalf in Nantucket court today, and his next hearing on the charge of indecent assault and battery was set for March 4 https://cnn.it/2FbUwzi pic.twitter.com/3hqnSjH8Bo,,plea guilty entered kevin spaceys behalf nantucket court today next hearing charge indecent assault battery set march 4,,210,,100,,1546897204,,2019-01-07 16:40:04
@CNNBrk,,cnnbrk,,Actor Kevin Spacey is expected to plead not guilty in court to accusations that he groped an 18-year-old busboy at a bar on Nantucket island. Follow live updates: https://cnn.it/2RzkBxT pic.twitter.com/dUtomVJpd4,,actor kevin spacey expected plead guilty court accusations groped 18yearold busboy bar nantucket island follow live updates,,288,,154,,1546893917,,2019-01-07 15:45:17
@CNNBrk,,cnnbrk,,Justice Ruth Bader Ginsburg is still recovering from surgery and will not be on the bench for the Supreme Court's first day of oral arguments in the new year https://cnn.it/2LVyGR7 pic.twitter.com/1dg1UG4fbE,,justice ruth bader ginsburg still recovering surgery bench supreme courts first day oral arguments new year,,441,,148,,1546890260,,2019-01-07 14:44:20
@CNNBrk,,CNNBusiness,,In an unusually quiet open for the market, stocks opened flat Monday. The Dow was up 30 points, the S&P 500 rose less than 0.1% and Nasdaq was up 0.2%. Watch live https://cnn.it/2CTZkH0 ,,unusually quiet open market stocks opened flat monday dow 30 points sp 500 rose less 01 nasdaq 02 watch live,,137,,44,,1546889736,,2019-01-07 14:35:36
@CNNBrk,,cnnbrk,,The Justice Department asks a federal judge to extend an Obamacare case deadline, saying the partial shutdown prohibits attorneys from working on it https://cnn.it/2Ffm9aT pic.twitter.com/r3KCKX2153,,justice department asks federal judge extend obamacare case deadline saying partial shutdown prohibits attorneys working,,356,,136,,1546889000,,2019-01-07 14:23:20
@CNNBrk,,CNN,,"Bohemian Rhapsody" wins best motion picture drama #goldenglobes https://cnn.it/2CSzUd4 pic.twitter.com/Vyk3hsZsBm,,bohemian rhapsody wins best motion picture drama goldenglobes,,7535,,1611,,1546852712,,2019-01-07 04:18:32
@CNNBrk,,CNN,,Rami Malek wins best actor in a motion picture drama for “Bohemian Rhapsody” #goldenglobes https://cnn.it/2CUoBRI pic.twitter.com/dZbLMYKFnA,,rami malek wins best actor motion picture drama “bohemian rhapsody” goldenglobes,,6596,,1307,,1546852472,,2019-01-07 04:14:32
@CNNBrk,,CNN,,Glenn Close wins best actress in a motion picture drama for "The Wife" #goldenglobes https://cnn.it/2CTEgkc pic.twitter.com/dUmAEP6err,,glenn close wins best actress motion picture drama the wife goldenglobes,,828,,119,,1546851921,,2019-01-07 04:05:21
@CNNBrk,,CNN,,“Green Book” wins best motion picture musical or comedy #goldenglobes https://cnn.it/2CUanjx pic.twitter.com/J7yscaWEyh,,“green book” wins best motion picture musical comedy goldenglobes,,764,,161,,1546851313,,2019-01-07 03:55:13
@CNNBrk,,CNN,,Rachel Brosnahan wins best performance by an actress in a television series musical or comedy for “The Marvelous Mrs. Maisel” #goldenglobes https://cnn.it/2CSy77Q pic.twitter.com/pMKofJonNe,,rachel brosnahan wins best performance actress television series musical comedy “the marvelous mrs maisel” goldenglobes,,1468,,178,,1546850831,,2019-01-07 03:47:11
@CNNBrk,,CNN,,Olivia Colman wins best actress in a motion picture musical or comedy for “The Favourite” #goldenglobes https://cnn.it/2FfDcIP pic.twitter.com/dzQqazOIPI,,olivia colman wins best actress motion picture musical comedy “the favourite” goldenglobes,,564,,96,,1546850745,,2019-01-07 03:45:45
@CNNBrk,,CNN,,“The Kominsky Method” wins best television series musical or comedy #goldenglobes https://cnn.it/2CQXNBy pic.twitter.com/WGGFeENIFZ,,“the kominsky method” wins best television series musical comedy goldenglobes,,509,,69,,1546849743,,2019-01-07 03:29:03
@CNNBrk,,CNN,,Christian Bale wins best actor in a motion picture musical or comedy for “Vice” #goldenglobes https://cnn.it/2CSraUi pic.twitter.com/fQ1uoneg3n,,christian bale wins best actor motion picture musical comedy “vice” goldenglobes,,1499,,310,,1546847080,,2019-01-07 02:44:40
@CNNBrk,,CNN,,Sandra Oh wins best performance by an actress in a television series drama for “Killing Eve” #goldenglobes https://cnn.it/2FaXK5n pic.twitter.com/CvEKpSgh21,,sandra oh wins best performance actress television series drama “killing eve” goldenglobes,,3666,,617,,1546845743,,2019-01-07 02:22:23
@CNNBrk,,CNN,,“The Americans” wins best television drama #goldenglobes https://cnn.it/2FhXpO2 pic.twitter.com/7yNj8Pg7ak,,“the americans” wins best television drama goldenglobes,,1023,,195,,1546842582,,2019-01-07 01:29:42
@CNNBrk,,cnnbrk,,The arrest of a man in connection with the killing of 7-year-old Jazmine Barnes came from a tip to writer and social activist Shaun King, which he passed to investigators, the sheriff says https://cnn.it/2SKfwAs pic.twitter.com/4hwzlbp90X,,arrest man connection killing 7yearold jazmine barnes came tip writer social activist shaun king passed investigators sheriff says,,1376,,306,,1546835361,,2019-01-06 23:29:21
@CNNBrk,,cnnbrk,,National Park Service says it will use money from visitor fees to keep parks operating during the government shutdown https://cnn.it/2Azja8Y pic.twitter.com/eNTCpLNbFO,,national park service says use money visitor fees keep parks operating government shutdown,,789,,215,,1546823960,,2019-01-06 20:19:20
@CNNBrk,,cnnbrk,,The US will pull out of Syria only with assurances Turkey will not attack Kurdish allies there, national security adviser John Bolton says https://cnn.it/2H0TzLR pic.twitter.com/MV3zcZF8CB,,us pull syria assurances turkey attack kurdish allies there national security adviser john bolton says,,452,,170,,1546819611,,2019-01-06 19:06:51
@CNNBrk,,cnnbrk,,President Trump says the US is negotiating a location for a second summit with North Korea's Kim Jong Un, whom Trump says he has spoken to "indirectly" https://cnn.it/2GXNFLF pic.twitter.com/YcK6T4E1lx,,president trump says us negotiating location second summit north koreas kim jong un trump says spoken indirectly,,331,,127,,1546816047,,2019-01-06 18:07:27
@CNNBrk,,cnnbrk,,The suspect in the shooting death of Jazmine Barnes is expected to be formally charged on Monday. A previous tweet incorrectly said he has already been charged. The previous tweet has been removed. https://cnn.it/2FcgdPM pic.twitter.com/E083fl0nVq,,suspect shooting death jazmine barnes expected formally charged monday previous tweet incorrectly said already charged previous tweet removed,,619,,192,,1546810217,,2019-01-06 16:30:17
@CNNBrk,,cnnbrk,,President Trump says he may declare a national emergency to get money for his border wall depending on what happens over the next few days https://cnn.it/2RuLL9n pic.twitter.com/3mLB7LcJEC,,president trump says may declare national emergency get money border wall depending happens next days,,932,,248,,1546808920,,2019-01-06 16:08:40
@CNNBrk,,cnnbrk,,Saudi woman says she is being detained at Bangkok's main airport after trying to escape from her parents in Kuwait https://cnn.it/2RBDQqE pic.twitter.com/sAUgUaoCkS,,saudi woman says detained bangkoks main airport trying escape parents kuwait,,1523,,1398,,1546807895,,2019-01-06 15:51:35
@CNNBrk,,CNNPolitics,,“We can’t allow this continual process…that if I don’t get what I want…I’m just going to shut down the government. If you reward the President with that kind of tactic, then we are going to see every year the President shutting down the government,” Rep. Adam Schiff sayspic.twitter.com/6b9J6MNBEk,,“we can’t allow continual process…that don’t get want…i’m going shut government reward president kind tactic going see every year president shutting government” rep adam schiff sayspictwittercom6b9j6mnbek,,10564,,3309,,1546804630,,2019-01-06 14:57:10
@CNNBrk,,CNNPolitics,,Alabama Democrat Sen. Doug Jones: “I do not believe that holding government workers and all those affected by government services hostage is the way to determine how best to secure our borders, which everyone wants” #CNNSOTU https://cnn.it/2H08E08 pic.twitter.com/vUqq5PGNWJ,,alabama democrat sen doug jones “i believe holding government workers affected government services hostage way determine best secure borders everyone wants” cnnsotu,,1233,,263,,1546804066,,2019-01-06 14:47:46
@CNNBrk,,CNNPolitics,,Mick Mulvaney on whether he supports President Trump using his emergency powers to fund the border wall: “I’m actually heavily involved with it and have been working with all the Cabinet secretaries to try and find money that we can legally use to defend the southern border”pic.twitter.com/PXTZlNmLk6,,mick mulvaney whether supports president trump using emergency powers fund border wall “i’m actually heavily involved working cabinet secretaries try find money legally use defend southern border”pictwittercompxtzlnmlk6,,202,,57,,1546802432,,2019-01-06 14:20:32
@CNNBrk,,CNNPolitics,,Acting White House chief of staff Mick Mulvaney: “The Democrats … think that they are winning this battle politically and they’re really not interested in opening the government because they think the President is paying a price politically and that’s unfortunate” #CNNSOTUpic.twitter.com/OPcwHxNeZx,,acting white house chief staff mick mulvaney “the democrats … think winning battle politically they’re really interested opening government think president paying price politically that’s unfortunate” cnnsotupictwittercomopcwhxnezx,,186,,71,,1546802037,,2019-01-06 14:13:57
@CNNBrk,,cnnbrk,,At least 40 people were killed when a gold mine collapsed Sunday in northern Afghanistan, authorities sayhttps://cnn.it/2H0yzov ,,least 40 people killed gold mine collapsed sunday northern afghanistan authorities,,279,,177,,1546798736,,2019-01-06 13:18:56
@CNNBrk,,cnnbrk,,Police investigating the drive-by killing of 7-year-old Jazmine Barnes in Houston say that they are interviewing "persons of interest" and that the case has taken a "new direction"  https://cnn.it/2SFXuPM pic.twitter.com/wdaho0J8rL,,police investigating driveby killing 7yearold jazmine barnes houston say interviewing persons interest case taken new direction,,4194,,1664,,1546768820,,2019-01-06 05:00:20
@CNNBrk,,cnnbrk,,Nevada death row inmate Scott Dozier was found dead in his cell, hanging from a bed sheet. His scheduled execution in July 2018 was put on hold over a conflict with the maker of one of the execution drugs. https://cnn.it/2SEDxc7 pic.twitter.com/VpSWDUa712,,nevada death row inmate scott dozier found dead cell hanging bed sheet scheduled execution july 2018 put hold conflict maker one execution drugs,,305,,115,,1546765568,,2019-01-06 04:06:08
@CNNBrk,,cnnbrk,,Talks between Trump administration officials and congressional staff to reopen the government "did not make much progress," acting White House chief of staff Mick Mulvaney says https://cnn.it/2AwAknT pic.twitter.com/CFLxarf2gj,,talks trump administration officials congressional staff reopen government did make much progress acting white house chief staff mick mulvaney says,,235,,102,,1546740345,,2019-01-05 21:05:45
@CNNBrk,,cnnbrk,,French authorities appeal for calm as spurts of unrest erupt across France in the latest gilet jaunes, or "yellow vest," protests https://cnn.it/2Ra0EOJ pic.twitter.com/rqXcSEQxyo,,french authorities appeal calm spurts unrest erupt across france latest gilet jaunes yellow vest protests,,512,,325,,1546736717,,2019-01-05 20:05:17
@CNNBrk,,cnnbrk,,Fearing assassination, NBA player Enes Kanter says he'll skip a team trip to London to avoid Turkey's spies https://cnn.it/2RASIFC pic.twitter.com/BBuhEwTOSk,,fearing assassination nba player enes kanter says hell skip team trip london avoid turkeys spies,,1476,,841,,1546731048,,2019-01-05 18:30:48
@CNNBrk,,cnnbrk,,NASA says it has canceled an upcoming visit by the head of Russia's space agency after mounting pressure from Capitol Hill over US sanctions against the official https://cnn.it/2TwNHvj pic.twitter.com/4qoDpkRuj2,,nasa says canceled upcoming visit head russias space agency mounting pressure capitol hill us sanctions official,,553,,172,,1546726262,,2019-01-05 17:11:02
@CNNBrk,,cnnbrk,,Pay raises will be frozen for Vice President Pence and other Cabinet members until the partial government shutdown is over, according to a memo by the Office of Personnel Management https://cnn.it/2LSBEG1 pic.twitter.com/Z0s6YHivHG,,pay raises frozen vice president pence cabinet members partial government shutdown over according memo office personnel management,,1629,,321,,1546722575,,2019-01-05 16:09:35
@CNNBrk,,cnnbrk,,Los Angeles has sued to stop the operator of The Weather Channel's app from allegedly mining the private data of users and selling that information to third parties https://cnn.it/2scHnxo pic.twitter.com/7jK3Kv1g1p,,los angeles sued stop operator weather channels app allegedly mining private data users selling information third parties,,595,,282,,1546722185,,2019-01-05 16:03:05
@CNNBrk,,cnnbrk,,Moscow says the US is withholding information about a Russian man arrested in a US territory in the Pacific  https://cnn.it/2Rdl21y pic.twitter.com/8veDmEmLdS,,moscow says us withholding information russian man arrested us territory pacific,,269,,91,,1546715218,,2019-01-05 14:06:58
@CNNBrk,,cnnbrk,,At least three dead, four injured after a shooting at a bowling alley in Southern California, police say https://cnn.it/2Ry0kJd pic.twitter.com/2q7U9JNUpV,,least three dead four injured shooting bowling alley southern california police say,,392,,399,,1546703696,,2019-01-05 10:54:56
@CNNBrk,,cnnbrk,,Five teen girls die in an escape room blaze in Poland, officials say https://cnn.it/2GUFhMF pic.twitter.com/LROzslcWXA,,five teen girls die escape room blaze poland officials say,,483,,305,,1546673847,,2019-01-05 02:37:27
@CNNBrk,,cnnbrk,,5 children on their way to Disney World and two truckers were identified as those killed in a fiery I-75 crash in Florida https://cnn.it/2H4CuRs pic.twitter.com/je5PYzJ0ef,,5 children way disney world two truckers identified killed fiery i75 crash florida,,413,,198,,1546671743,,2019-01-05 02:02:23
@CNNBrk,,cnnbrk,,Congressman proposes constitutional amendments to abolish the US Electoral College and prevent presidents from pardoning themselves https://cnn.it/2RucbIm pic.twitter.com/G3aCjBLJZW,,congressman proposes constitutional amendments abolish us electoral college prevent presidents pardoning,,4319,,829,,1546668104,,2019-01-05 01:01:44
@CNNBrk,,cnnbrk,,Navy SEAL pleads not guilty to a premeditated murder charge in the stabbing death of a wounded teenage ISIS fighter https://cnn.it/2H5pD10 pic.twitter.com/36YLqc6tpC,,navy seal pleads guilty premeditated murder charge stabbing death wounded teenage isis fighter,,294,,90,,1546662580,,2019-01-04 23:29:40
@CNNBrk,,cnnbrk,,TSA screeners tasked with keeping air travel safe are calling out sick at major US airports as they're expected to work without pay mid-shutdown https://cnn.it/2GUfi85 pic.twitter.com/7zSikLDaeU,,tsa screeners tasked keeping air travel safe calling sick major us airports theyre expected work without pay midshutdown,,1180,,616,,1546656573,,2019-01-04 21:49:33
@CNNBrk,,cnnbrk,,A federal court extends Robert Mueller's federal grand jury so it can continue to investigate past an 18-month term that was about to expire https://cnn.it/2GWwzhf pic.twitter.com/iFyup1REqp,,federal court extends robert muellers federal grand jury continue investigate past 18month term expire,,1831,,413,,1546654080,,2019-01-04 21:08:00
@CNNBrk,,cnnbrk,,A man who was being treated for suspected Ebola in Sweden does not have the deadly virus, hospital says https://cnn.it/2RxeKt5 pic.twitter.com/1uyqSDI7kD,,man treated suspected ebola sweden deadly virus hospital says,,354,,133,,1546652959,,2019-01-04 20:49:19
@CNNBrk,,cnnbrk,,President Trump confirms that he told top Democrats today that he's ready to let the partial government shutdown go on for months or years. Follow live updates: https://cnn.it/2GUAdId pic.twitter.com/DQEdZt4DK5,,president trump confirms told top democrats today hes ready let partial government shutdown go months years follow live updates,,1024,,506,,1546648513,,2019-01-04 19:35:13
@CNNBrk,,cnnbrk,,House Speaker Pelosi and Sen. Schumer take questions after a shutdown meeting with President Trump. Follow live updates:https://cnn.it/2GSft3W ,,house speaker pelosi sen schumer take questions shutdown meeting president trump follow live,,230,,64,,1546644983,,2019-01-04 18:36:23
@CNNBrk,,cnnbrk,,The man behind the USS Cole attack that killed 17 American sailors in 2000 has been killed in a US airstrike, an official says https://cnn.it/2Rug7J6 pic.twitter.com/F17HtShfrD,,man behind uss cole attack killed 17 american sailors 2000 killed us airstrike official says,,3657,,945,,1546643342,,2019-01-04 18:09:02
@CNNBrk,,CNNPolitics,,Watchdog claims Ivanka Trump violated conflict of interest law with involvement in "opportunity zones" program https://cnn.it/2F8IqWK pic.twitter.com/BENO2cRkCW,,watchdog claims ivanka trump violated conflict interest law involvement opportunity zones program,,1873,,748,,1546639266,,2019-01-04 17:01:06
@CNNBrk,,cnnbrk,,President Trump plans to speak in the Rose Garden this afternoon after his meeting with lawmakers on the shutdown. Follow live updates: https://cnn.it/2C0H90K pic.twitter.com/3s7ko6CUrZ,,president trump plans speak rose garden afternoon meeting lawmakers shutdown follow live updates,,253,,89,,1546638652,,2019-01-04 16:50:52
@CNNBrk,,cnnbrk,,Five children who were likely on their way to Disney World were among those killed in a fiery multi-vehicle crash on a Florida highway Thursday, officials say. The two others killed were men driving semi-trucks. https://cnn.it/2QkHUqN pic.twitter.com/6dVirC5qS1,,five children likely way disney world among killed fiery multivehicle crash florida highway thursday officials say two others killed men driving semitrucks,,369,,246,,1546636495,,2019-01-04 16:14:55
@CNNBrk,,CNNBusiness,,The Dow opened 300 points higher on Friday, rebounding from Thursday’s 660-point plunge. The S&P 500 rose 1.3% and the Nasdaq rose 1.6%. The rebound came after Friday's jobs report showed the US economy still has some strength left in it. Watch live https://cnn.it/2CNE4mq ,,dow opened 300 points higher friday rebounding thursday’s 660point plunge sp 500 rose 13 nasdaq rose 16 rebound came fridays jobs report showed us economy still strength left it watch live,,244,,80,,1546630488,,2019-01-04 14:34:48
@CNNBrk,,cnnbrk,,Employers added 312,000 jobs last month, well more than economists forecast. The unemployment rate ticked up to 3.9% as more people looked for jobs. https://cnn.it/2RoSVfl pic.twitter.com/jXE28Ix5Ya,,employers added 312000 jobs last month well economists forecast unemployment rate ticked 39 people looked jobs,,280,,112,,1546627243,,2019-01-04 13:40:43
@CNNBrk,,cnnbrk,,A person in Sweden is being treated for suspected Ebola contamination, local officials in Uppsala say https://cnn.it/2C40SfV pic.twitter.com/YuGZUXEjLH,,person sweden treated suspected ebola contamination local officials uppsala say,,369,,375,,1546626226,,2019-01-04 13:23:46
@CNNBrk,,CNNPolitics,,JUST IN: House Democrats vote to reject Trump's demand for wall funding https://cnn.it/2F6Yo3J pic.twitter.com/l0oX4qDh18,,in house democrats vote reject trumps demand wall funding,,5022,,766,,1546588088,,2019-01-04 02:48:08
@CNNBrk,,cnnbrk,,Southwest Airlines founder Herb Kelleher, who left his law firm to start the low-cost airline in the 1960s, is dead at 87 https://cnn.it/2RqlNnm pic.twitter.com/vv4nGMIU7W,,southwest airlines founder herb kelleher left law firm start lowcost airline 1960s dead 87,,763,,365,,1546581334,,2019-01-04 00:55:34
@CNNBrk,,cnnbrk,,#MeToo cited as one reason rape reports increased 22% last year in New York https://cnn.it/2Rt4ja0 pic.twitter.com/GPdGTOxgH9,,metoo cited one reason rape reports increased 22 last year new york,,797,,216,,1546579672,,2019-01-04 00:27:52
@CNNBrk,,cnnbrk,,Six people are dead after a fiery multivehicle crash on I-75 in Florida, authorities say https://cnn.it/2Rsy1fc pic.twitter.com/oi4WeBnLuK,,six people dead fiery multivehicle crash i75 florida authorities say,,255,,220,,1546578500,,2019-01-04 00:08:20
@CNNBrk,,cnnbrk,,House Democrats address government shutdown and immigration in the first press conference of the newly sworn-in Congress. Watch live: https://cnn.it/2QJjtYp pic.twitter.com/NDqSPCnzkf,,house democrats address government shutdown immigration first press conference newly swornin congress watch live,,332,,76,,1546578002,,2019-01-04 00:00:02
@CNNBrk,,cnnbrk,,President Trump joins a surprise White House press briefing. Watch CNN: https://cnn.it/2RA4joM pic.twitter.com/j20mDYXPY7,,president trump joins surprise white house press briefing watch cnn,,335,,108,,1546569092,,2019-01-03 21:31:32
@CNNBrk,,cnnbrk,,The White House holds a surprise press briefing. Follow live updates: https://cnn.it/2RA4joM pic.twitter.com/yeVzUlReg2,,white house holds surprise press briefing follow live updates,,182,,54,,1546568545,,2019-01-03 21:22:25
@CNNBrk,,cnnbrk,,House Democratic leader Nancy Pelosi reclaims the speaker's gavel to preside over an emboldened and energized majority https://cnn.it/2GTTCJs pic.twitter.com/8NAQ3R2SSM,,house democratic leader nancy pelosi reclaims speakers gavel preside emboldened energized majority,,2356,,428,,1546560478,,2019-01-03 19:07:58
@CNNBrk,,cnnbrk,,Russia has formally charged US citizen Paul Whelan with espionage, his lawyer says https://cnn.it/2AumwKF pic.twitter.com/sJHvuh6ZPV,,russia formally charged us citizen paul whelan espionage lawyer says,,187,,146,,1546550257,,2019-01-03 16:17:37
@CNNBrk,,cnnbrk,,All passengers and crew are safe after an Ethiopian Airlines plane carrying 139 people skidded off the runway when it landed at Entebbe airport in Uganda, officials say https://cnn.it/2QkLGjM pic.twitter.com/Nw2LL3zh4e,,passengers crew safe ethiopian airlines plane carrying 139 people skidded runway landed entebbe airport uganda officials say,,412,,156,,1546547992,,2019-01-03 15:39:52
@CNNBrk,,CNNBusiness,,US stocks dropped sharply on Thursday morning after Apple warned it will badly miss its quarterly sales forecast because of weakening growth and trade tensions in China. Apple, among the world's most widely held stocks, plummeted 8%. Watch live https://cnn.it/2F8jTkS ,,us stocks dropped sharply thursday morning apple warned badly miss quarterly sales forecast weakening growth trade tensions china apple among worlds widely held stocks plummeted 8 watch live,,321,,172,,1546544084,,2019-01-03 14:34:44
@CNNBrk,,cnnbrk,,Thousands of people are fleeing popular Thai islands as Tropical Storm Pabuk approaches. It could be the most devastating storm to hit Thailand in decades, officials tell CNN. https://cnn.it/2s7gMBF pic.twitter.com/vVHHASssZ1,,thousands people fleeing popular thai islands tropical storm pabuk approaches could devastating storm hit thailand decades officials tell cnn,,600,,432,,1546540553,,2019-01-03 13:35:53
@CNNBrk,,CNNPolitics,,Nancy Pelosi says it's "an open discussion" whether a sitting president can be indicted https://cnn.it/2CLT8AR pic.twitter.com/bpkAK9WahV,,nancy pelosi says an open discussion whether sitting president indicted,,1833,,355,,1546538498,,2019-01-03 13:01:38
@CNNBrk,,cnnbrk,,China's space agency has successfully landed a rover on the far side of the moon in a historic first, state media says https://cnn.it/2RsoTXP pic.twitter.com/BQTTERbUa0,,chinas space agency successfully landed rover far side moon historic first state media says,,1748,,769,,1546503105,,2019-01-03 03:11:45
@CNNBrk,,cnnbrk,,Bob Einstein, whose 50-year career as a comedy writer and performer ranged from "The Smothers Brothers Comedy Hour" to Larry David's "Curb Your Enthusiasm," has died at 76 https://cnn.it/2RynE9S pic.twitter.com/BUWC6QmwlR,,bob einstein whose 50year career comedy writer performer ranged the smothers brothers comedy hour larry davids curb enthusiasm died 76,,651,,179,,1546486495,,2019-01-02 22:34:55
@CNNBrk,,cnnbrk,,Senate Majority Leader Mitch McConnell says no progress was made in a meeting with Trump and that it may take "weeks" to end the partial government shutdown https://cnn.it/2GQIv3V pic.twitter.com/TbFpPBhcAW,,senate majority leader mitch mcconnell says progress made meeting trump may take weeks end partial government shutdown,,492,,236,,1546484709,,2019-01-02 22:05:09
@CNNBrk,,cnnbrk,,Romney says Trump's abrupt decision to pull out of Syria drove him to pen scathing op-ed https://cnn.it/2GRKrt4 pic.twitter.com/Cz9YQAC4RW,,romney says trumps abrupt decision pull syria drove pen scathing oped,,584,,137,,1546482734,,2019-01-02 21:32:14
@CNNBrk,,cnnbrk,,Mitt Romney talks to CNN about the scathing op-ed he wrote on President Trump. Follow live updates: https://cnn.it/2RxaSYU pic.twitter.com/O74891RkrF,,mitt romney talks cnn scathing oped wrote president trump follow live updates,,209,,60,,1546481784,,2019-01-02 21:16:24
@CNNBrk,,cnnbrk,,More than 11,000 pounds of Zeigler Red Hots ready-to-eat chicken and pork sausage products recalled over concerns they may contain metal https://cnn.it/2RvxKbi pic.twitter.com/qJj5jo7VQU,,11000 pounds zeigler red hots readytoeat chicken pork sausage products recalled concerns may contain metal,,135,,138,,1546474776,,2019-01-02 19:19:36
@CNNBrk,,cnnbrk,,The fatal shooting of a US Marine Tuesday in Washington, DC, is being investigated as a possible accidental discharge, official says https://cnn.it/2RvTCTO pic.twitter.com/IWt5tiPzD9,,fatal shooting us marine tuesday washington dc investigated possible accidental discharge official says,,188,,93,,1546473819,,2019-01-02 19:03:39
@CNNBrk,,cnnbrk,,The number of Ebola cases in Congo's outbreak surpasses 600, with 366 deaths, health officials say https://cnn.it/2F45Uw4 pic.twitter.com/BgZjNtRnG2,,number ebola cases congos outbreak surpasses 600 366 deaths health officials say,,899,,997,,1546461485,,2019-01-02 15:38:05
@CNNBrk,,cnnbrk,,President Trump will host congressional leaders in the Situation Room for a 3 p.m. ET briefing on border security. Follow live updates on day 12 of the shutdown: https://cnn.it/2F3gN1p pic.twitter.com/SJO8Uf8e6v,,president trump host congressional leaders situation room 3 pm et briefing border security follow live updates day 12 shutdown,,212,,83,,1546460017,,2019-01-02 15:13:37
@CNNBrk,,cnnbrk,,Russia says US consular officials have been granted access to Paul Whelan, an American detained in Moscow on accusations of spying https://cnn.it/2SylPGW pic.twitter.com/w6I4d9M8KM,,russia says us consular officials granted access paul whelan american detained moscow accusations spying,,228,,104,,1546457997,,2019-01-02 14:39:57
@CNNBrk,,CNNBusiness,,The Dow started 2019 by plunging 375 points, at market open Wednesday. The S&P 500 dropped 1.3%, while the Nasdaq fell 1.7%. Tesla fell 8% after the company announced that it was cutting prices of its vehicles by $2,000. Watch live https://cnn.it/2F47Gh1 ,,dow started 2019 plunging 375 points market open wednesday sp 500 dropped 13 nasdaq fell 17 tesla fell 8 company announced cutting prices vehicles 2000 watch live,,449,,257,,1546457686,,2019-01-02 14:34:46
@CNNBrk,,cnnbrk,,President Trump fires back at Mitt Romney on Twitter after Romney's op-ed saying the President "has not risen to the mantle of the office" http://cnn.it/2F32Twf pic.twitter.com/DXUaYICYxB,,president trump fires back mitt romney twitter romneys oped saying president has risen mantle office,,332,,94,,1546453466,,2019-01-02 13:24:26
@CNNBrk,,cnnbrk,,Six people were killed and 16 injured in an accident involving a commuter train on the Great Belt Bridge in Denmark, police said. https://cnn.it/2R693mo pic.twitter.com/9i8hA8ENKs,,six people killed 16 injured accident involving commuter train great belt bridge denmark police said,,181,,110,,1546444366,,2019-01-02 10:52:46
@CNNBrk,,cnnbrk,,A ticket sold in New York state matched all the numbers to win the $425 million Mega Millions jackpot. https://cnn.it/2AmMvDy pic.twitter.com/uNVyhiWyZI,,ticket sold new york state matched numbers win 425 million mega millions jackpot,,1044,,345,,1546433188,,2019-01-02 07:46:28
@CNNBrk,,cnnbrk,,A small earthquake in North Korea was induced by the September 2017 underground detonation of a nuclear device https://cnn.it/2Akm0Pd pic.twitter.com/nqGsap7l5f,,small earthquake north korea induced september 2017 underground detonation nuclear device,,346,,206,,1546416843,,2019-01-02 03:14:03
@CNNBrk,,cnnbrk,,Sen.-elect Mitt Romney wrote "the President has not risen to the mantle of the office" in an opinion piece for The Washington Post https://cnn.it/2TkFZUY pic.twitter.com/P8PLW0wRVx,,senelect mitt romney wrote the president risen mantle office opinion piece washington post,,4422,,804,,1546415053,,2019-01-02 02:44:13
@CNNBrk,,cnnbrk,,Several water fountains were shut down at a Cleveland airport after passengers aboard a Frontier Airlines flight became sick, airport officials say https://cnn.it/2F20Qtg pic.twitter.com/j2ve3exVCz,,several water fountains shut cleveland airport passengers aboard frontier airlines flight became sick airport officials say,,253,,170,,1546410930,,2019-01-02 01:35:30
@CNNBrk,,cnnbrk,,Toddler rushed to the hospital after a rhino encounter at a Florida zoo https://cnn.it/2AsYgbD pic.twitter.com/OjhvCVi5BY,,toddler rushed hospital rhino encounter florida zoo,,273,,125,,1546408198,,2019-01-02 00:49:58
@CNNBrk,,cnnbrk,,US Customs and Border Protection is investigating an incident in which agents used tear gas, pepper spray and smoke as more than 100 migrants tried to enter the country illegally https://cnn.it/2s3k4py pic.twitter.com/3RNpVzO8tI,,us customs border protection investigating incident agents used tear gas pepper spray smoke 100 migrants tried enter country illegally,,521,,322,,1546402136,,2019-01-01 23:08:56
@CNNBrk,,cnnbrk,,Trump invites congressional leaders from both parties to the White House, sources say, setting the stage for their first meeting since the partial government shutdown began 11 days ago https://cnn.it/2GQ1eg2 pic.twitter.com/Bk6SjdfQmF,,trump invites congressional leaders parties white house sources say setting stage first meeting since partial government shutdown began 11 days ago,,471,,134,,1546389303,,2019-01-01 19:35:03
@CNNBrk,,cnnbrk,,A US Marine was shot and killed while on duty at the Marine Barracks in Washington, DC, early Tuesday morning https://cnn.it/2GNnd7q pic.twitter.com/Y0BfNjvv2t,,us marine shot killed duty marine barracks washington dc early tuesday morning,,320,,297,,1546386895,,2019-01-01 18:54:55
@CNNBrk,,cnnbrk,,Trump slams retired Army Gen. Stanley McChrystal, tweeting that he has a "big, dumb mouth." On Sunday, McChrystal called the President dishonest and immoral. https://cnn.it/2Tk8vWM pic.twitter.com/NKicFsd014,,trump slams retired army gen stanley mcchrystal tweeting big dumb mouth sunday mcchrystal called president dishonest immoral,,1489,,427,,1546386555,,2019-01-01 18:49:15
@CNNBrk,,cnnbrk,,A NASA probe just sent home this image of the most distant object ever visited by a spacecraft. It's 4 billion miles from Earth. https://cnn.it/2CIj6Fk pic.twitter.com/axBBdlcEDg,,nasa probe sent home image distant object ever visited spacecraft 4 billion miles earth,,1557,,453,,1546382031,,2019-01-01 17:33:51
@CNNBrk,,cnnbrk,,Baby boy rescued from rubble a day after an explosion leveled an apartment building in Russia https://cnn.it/2BVxxnQ pic.twitter.com/VWpAeyL1oz,,baby boy rescued rubble day explosion leveled apartment building russia,,546,,104,,1546378396,,2019-01-01 16:33:16
@CNNBrk,,cnnbrk,,Roger Federer wins historic mixed doubles match against fellow tennis great Serena Williams at the Hopman Cup https://cnn.it/2CKlvQ1 pic.twitter.com/wO5zYSTXaW,,roger federer wins historic mixed doubles match fellow tennis great serena williams hopman cup,,1427,,264,,1546376415,,2019-01-01 16:00:15
@CNNBrk,,cnnbrk,,Police launch a terror investigation after three people were stabbed at a UK railway station during New Year's Eve celebrations https://cnn.it/2Rl9jgP pic.twitter.com/r8FbHXEec7,,police launch terror investigation three people stabbed uk railway station new years eve celebrations,,194,,93,,1546369140,,2019-01-01 13:59:00
@CNNBrk,,cnnbrk,,A US citizen who has been detained in Russia on suspicion of spying is a retired Marine who was in Moscow for a wedding, his twin brother says https://cnn.it/2BRL0NO pic.twitter.com/I3mwCD2U2C,,us citizen detained russia suspicion spying retired marine moscow wedding twin brother says,,532,,293,,1546367137,,2019-01-01 13:25:37
@CNNBrk,,cnnbrk,,At least nine people were injured when a driver deliberately plowed into crowds celebrating the New Year in central Tokyo Tuesday morning https://cnn.it/2SvZ72f pic.twitter.com/zFMiZWiagO,,least nine people injured driver deliberately plowed crowds celebrating new year central tokyo tuesday morning,,237,,191,,1546366685,,2019-01-01 13:18:05
@CNNBrk,,cnnbrk,,First responders treated 56 people following a crash just after midnight New Year's Eve involving more than 20 vehicles near Austin, Texas https://cnn.it/2s0GfwP pic.twitter.com/4gRghM1JDC,,first responders treated 56 people following crash midnight new years eve involving 20 vehicles near austin texas,,384,,249,,1546366488,,2019-01-01 13:14:48
@CNNBrk,,cnnbrk,,Bollywood star Kader Khan has died at the age of 81 following a prolonged illness https://cnn.it/2F0JSer pic.twitter.com/ZHKhBLuEel,,bollywood star kader khan died age 81 following prolonged illness,,348,,108,,1546366404,,2019-01-01 13:13:24
@CNNBrk,,cnnbrk,,North Korean leader Kim Jong Un affirmed his apparent commitment to denuclearization but says that might change if the US continues its "one-sided demands" https://cnn.it/2BQ1s10 pic.twitter.com/K0JwN8A1E3,,north korean leader kim jong un affirmed apparent commitment denuclearization says might change us continues onesided demands,,585,,240,,1546329696,,2019-01-01 03:01:36
@CNNBrk,,cnnbrk,,A federal employee labor union is suing the US government for requiring "essential" employees to continue working without pay during the partial government shutdown https://cnn.it/2AqlUWm pic.twitter.com/yCFcF2tsnz,,federal employee labor union suing us government requiring essential employees continue working without pay partial government shutdown,,2129,,526,,1546324865,,2019-01-01 01:41:05
@CNNBrk,,cnnbrk,,A man was detained after three people were stabbed at train station in Manchester, England https://cnn.it/2Rl9jgP pic.twitter.com/sVnrpAcloi,,man detained three people stabbed train station manchester england,,215,,88,,1546324323,,2019-01-01 01:32:03
@CNNBrk,,cnnbrk,,Chief Justice John Roberts praised judges and avoided direct criticism of President Trump in his year-end report https://cnn.it/2rXO5Hw pic.twitter.com/5WY4h268Ww,,chief justice john roberts praised judges avoided direct criticism president trump yearend report,,237,,74,,1546323436,,2019-01-01 01:17:16
@CNNBrk,,cnnbrk,,President Trump will give the Pentagon about four months to withdraw nearly 2,000 military personnel stationed in Syria, The New York Times reports https://cnn.it/2RpdW9n pic.twitter.com/ckS9qMmGj5,,president trump give pentagon four months withdraw nearly 2000 military personnel stationed syria new york times reports,,243,,157,,1546320395,,2019-01-01 00:26:35
@CNNBrk,,cnnbrk,,Chicago murder rate drops for second year in a row https://cnn.it/2GOeIJe pic.twitter.com/ndyDWebJtH,,chicago murder rate drops second year row,,1292,,210,,1546316306,,2018-12-31 23:18:26
@CNNBrk,,cnnbrk,,2018 was one investors would rather forget. US stocks had their worst year in a decade and the Dow and S&P 500 had their worst December since 1931. https://cnn.it/2GPfqpD pic.twitter.com/hZZCpovJYy,,2018 one investors would rather forget us stocks worst year decade dow sp 500 worst december since 1931,,476,,281,,1546310053,,2018-12-31 21:34:13
@CNNBrk,,CNNPolitics,,House Democrats to pass a plan to reopen the government Thursday https://cnn.it/2F2nL6y pic.twitter.com/mCCrMt6erc,,house democrats pass plan reopen government thursday,,1185,,233,,1546301713,,2018-12-31 19:15:13
@CNNBrk,,cnnbrk,,Colorado prosecutors file five charges against Patrick Frazee in the death of Kelsey Berreth, his missing fiancee and mother of his 1-year-old daughter https://cnn.it/2TjbnDq pic.twitter.com/Ii8KKgcA6W,,colorado prosecutors file five charges patrick frazee death kelsey berreth missing fiancee mother 1yearold daughter,,341,,99,,1546295819,,2018-12-31 17:36:59
@CNNBrk,,cnnbrk,,Authorities are hunting for a man who shot into a car as it left a Houston-area Walmart Sunday, killing 7-year-old Jazmine Barnes. The suspect is described as a white male in his 40s who fled the scene in a red truck. https://cnn.it/2ApDIRe pic.twitter.com/a0kIN1MCDG,,authorities hunting man shot car left houstonarea walmart sunday killing 7yearold jazmine barnes suspect described white male 40s fled scene red truck,,1897,,2087,,1546288837,,2018-12-31 15:40:37
@CNNBrk,,cnnbrk,,Sen. Elizabeth Warren launches a presidential exploratory committee ahead of an expected run for the Democratic nomination in 2020 https://cnn.it/2EYmNIQ pic.twitter.com/eXp1zWEz84,,sen elizabeth warren launches presidential exploratory committee ahead expected run democratic nomination 2020,,1527,,319,,1546281210,,2018-12-31 13:33:30
@CNNBrk,,cnnbrk,,Vatican spokesman Greg Burke and his deputy, Paloma Garcia Ovejero, have resigned, according to an official statement https://cnn.it/2EXM1b5 pic.twitter.com/E6roxtmSIX,,vatican spokesman greg burke deputy paloma garcia ovejero resigned according official statement,,202,,101,,1546279819,,2018-12-31 13:10:19
@CNNBrk,,cnnbrk,,Tropical depression Usman's toll in the Philippines climbs to 68 people killed, the national disaster agency says https://cnn.it/2VsNdIu pic.twitter.com/S1BMyxLXrL,,tropical depression usmans toll philippines climbs 68 people killed national disaster agency says,,165,,110,,1546279512,,2018-12-31 13:05:12
@CNNBrk,,cnnbrk,,Search and rescue efforts are ongoing after a suspected gas explosion at an apartment building in Magnitogorsk, Russia. State media reports at least four people have died and dozens are missing. https://cnn.it/2LHjeYS pic.twitter.com/OFAr9b3Ny0,,search rescue efforts ongoing suspected gas explosion apartment building magnitogorsk russia state media reports least four people died dozens missing,,128,,70,,1546277575,,2018-12-31 12:32:55
@CNNBrk,,cnnbrk,,At least two people were killed and 23 wounded in an explosion outside a shopping mall in the southern Philippines, officials said.https://cnn.it/2EWBSuh ,,least two people killed 23 wounded explosion outside shopping mall southern philippines officials,,289,,161,,1546265035,,2018-12-31 09:03:55
@CNNBrk,,cnnbrk,,At least three people are dead and dozens are missing after an explosion rocked an apartment building in the southern Russian city of Magnitogorsk, state media reported.https://cnn.it/2GPv0Bv ,,least three people dead dozens missing explosion rocked apartment building southern russian city magnitogorsk state media,,304,,193,,1546260924,,2018-12-31 07:55:24
@CNNBrk,,cnnbrk,,A lion killed a college intern Sunday at a North Carolina zoological park after it escaped a locked enclosure during a routine cleaning, officials said https://cnn.it/2AndChH pic.twitter.com/pOf8qnjdzX,,lion killed college intern sunday north carolina zoological park escaped locked enclosure routine cleaning officials said,,381,,198,,1546239498,,2018-12-31 01:58:18
@CNNBrk,,cnnbrk,,A federal judge who ruled part of the Affordable Care Act unconstitutional says the law will remain in effect while it's being appealed https://cnn.it/2Soudc5 pic.twitter.com/cf2dEM73od,,federal judge ruled part affordable care act unconstitutional says law remain effect appealed,,635,,222,,1546236931,,2018-12-31 01:15:31
@cnn,,CNN,,A DC-based craft brewery is suing the Trump administration, saying the ongoing partial government shutdown is threatening to prevent it from selling a new beer https://cnn.it/2FDeuCC pic.twitter.com/xBGSHpd8cc,,dcbased craft brewery suing trump administration saying ongoing partial government shutdown threatening prevent selling new beer,,84,,20,,1547609614,,2019-01-15 22:33:34
@cnn,,CNNSitRoom,,“He said he’s going to be independent, he will stand up to political pressure."  CNN’s @mkraju has the latest on Attorney General nominee William Barr’s confirmation hearing before the Senate. http://cnn.it/2ALR6zo pic.twitter.com/BjlwqiAsde,,“he said he’s going independent stand political pressure  cnn’s mkraju latest attorney general nominee william barr’s confirmation hearing senate,,15,,8,,1547608694,,2019-01-15 22:18:14
@cnn,,TheLeadCNN,,“He is going to discourage so many people in the next generation from ever going to work in Washington or working as a civil servant. Why in the hell should you go work in this craziness?” @David_Gergen says about President Trump's handling of the shutdown https://cnn.it/2AHgqGI pic.twitter.com/neo0EpDOFF,,“he going discourage many people next generation ever going work washington working civil servant hell go work craziness” davidgergen says president trumps handling shutdown,,71,,33,,1547607102,,2019-01-15 21:51:42
@cnn,,CNN,,Chris Watts' multilevel Colorado home is being foreclosed and put up for auction -- for any buyers willing to look past its tragic history https://cnn.it/2D9nJsg ,,chris watts multilevel colorado home foreclosed put auction  buyers willing look past tragic history,,46,,11,,1547609075,,2019-01-15 22:24:35
@cnn,,CNN,,"Hulking robots make for good cinema but aren't accurate representations of how AI can and does do harm today," writes Mark Surman, executive director of the Mozilla Foundation, for @CNNOpinionhttps://cnn.it/2FF1JHH ,,hulking robots make good cinema accurate representations ai harm today writes mark surman executive director mozilla foundation,,64,,30,,1547608565,,2019-01-15 22:16:05
@cnn,,CNN,,Kayla, whose husband isn't getting paid today because of the govt. shutdown, joins Full Circle, along with @randikayeCNN, who was with Captain Chesley ‘Sully’ Sullenberger and a group of survivors 10 years after the ‘Miracle on the Hudson.’ Tune in 6:25pET https://cnn.it/2Dc5J0B pic.twitter.com/J9lmZ9X19H,,kayla whose husband getting paid today govt shutdown joins full circle along randikayecnn captain chesley ‘sully’ sullenberger group survivors 10 years ‘miracle hudson’ tune 625pet,,64,,17,,1547608189,,2019-01-15 22:09:49
@cnn,,CNN,,What happens now with Brexit? British PM Theresa May's big defeat leaves no clear options | Analysis by CNN's @lukemcgee https://cnn.it/2FCW5Wb pic.twitter.com/6oJeUjNRhj,,happens brexit british pm theresa mays big defeat leaves clear options  analysis cnns lukemcgee,,105,,38,,1547607667,,2019-01-15 22:01:07
@cnn,,CNN,,Why Gillette's ad slamming toxic masculinity is drawing cheers -- and anger | By @JillFilipovic for @CNNOpinion https://cnn.it/2DaRitI pic.twitter.com/JC8NW6m9BC,,gillettes ad slamming toxic masculinity drawing cheers  anger  jillfilipovic cnnopinion,,189,,66,,1547607031,,2019-01-15 21:50:31
@cnn,,CNN,,"This was a scale of defeat that doubled the prediction of even the worst predicted defeat." -CNN's @camanpour on British PM Theresa May's Brexit deal failure https://cnn.it/2Fvmwhz pic.twitter.com/6cno4im58O,,this scale defeat doubled prediction even worst predicted defeat cnns camanpour british pm theresa mays brexit deal failure,,119,,49,,1547606700,,2019-01-15 21:45:00
@cnn,,CNN,,Acting Attorney General Matt Whitaker agrees to testify before the House Judiciary Committee https://cnn.it/2FBlYpn pic.twitter.com/yvht9CPKeY,,acting attorney general matt whitaker agrees testify house judiciary committee,,236,,79,,1547606054,,2019-01-15 21:34:14
@cnn,,CNN,,Inside the political life of Miguel Cervantes, the star of Chicago's production of "Hamilton" https://cnn.it/2Ddx6HH  #AxeFilespic.twitter.com/lMIrHZiQzQ,,inside political life miguel cervantes star chicagos production hamilton axefilespictwittercomlmirhziqzq,,75,,20,,1547605865,,2019-01-15 21:31:05
@cnn,,CNN,,Acting Attorney General Matt Whitaker has agreed to testify before the House Judiciary Committee early next month, the panel's chairman announced https://cnn.it/2DbGonj pic.twitter.com/57fYDBpuHl,,acting attorney general matt whitaker agreed testify house judiciary committee early next month panels chairman announced,,126,,46,,1547605217,,2019-01-15 21:20:17
@cnn,,TheLeadCNN,,“Barr cast doubt that he would ever fire Mueller, even for good cause.”  @SchneiderCNN has the latest on Attorney General nominee William Barr’s confirmation hearing before the Senate. http://cnn.it/2ALR6zo pic.twitter.com/lX9lvZpVVa,,“barr cast doubt would ever fire mueller even good cause”  schneidercnn latest attorney general nominee william barr’s confirmation hearing senate,,66,,16,,1547604781,,2019-01-15 21:13:01
@cnn,,CNN,,Mari Stull, the wine blogger lobbyist turned Trump administration appointee who is under investigation for allegedly vetting and blacklisting State Department employees for "disloyalty," has left her post, a spokesperson confirmedhttps://cnn.it/2Dbk11k ,,mari stull wine blogger lobbyist turned trump administration appointee investigation allegedly vetting blacklisting state department employees disloyalty left post spokesperson,,222,,107,,1547604664,,2019-01-15 21:11:04
@cnn,,CNNBusiness,,The Nasdaq gained 1.7% on Tuesday as technology stocks raced higher. The Dow jumped 156 points, or 0.7%, while the S&P 500 advanced 1.1%. Netflix helped lead the market rally, jumping 7% after announcing a price hike. https://cnn.it/2FER5Rf ,,nasdaq gained 17 tuesday technology stocks raced higher dow jumped 156 points 07 sp 500 advanced 11 netflix helped lead market rally jumping 7 announcing price hike,,48,,29,,1547604557,,2019-01-15 21:09:17
@cnn,,CNN,,Read Theresa May's full statement to the House of Commons in the immediate aftermath of her historic #BrexitVote defeathttps://cnn.it/2FAynde ,,read theresa mays full statement house commons immediate aftermath historic brexitvote,,80,,53,,1547604513,,2019-01-15 21:08:33
@cnn,,CNNPolitics,,In her line of questioning, Democratic Sen. Kamala Harris tried to draw out a situation in which attorney general nominee William Barr would not take the advice of career ethics officials if they advised him to recuse himself https://cnn.it/2Ma4NMU pic.twitter.com/SBSqQB7UCj,,line questioning democratic sen kamala harris tried draw situation attorney general nominee william barr would take advice career ethics officials advised recuse,,132,,54,,1547604165,,2019-01-15 21:02:45
@cnn,,CNN,,The House, by a vote of 424 to 1, approved a resolution rejecting white supremacy and white nationalism after GOP Rep. Steve King made racist comments in a story published in The New York Timeshttps://cnn.it/2FyxqCa ,,house vote 424 1 approved resolution rejecting white supremacy white nationalism gop rep steve king made racist comments story published new york,,453,,121,,1547604220,,2019-01-15 21:03:40
@cnn,,CNN,,Why journalists at the nation's largest newspaper chain are nervous https://cnn.it/2DaMhBo pic.twitter.com/FT0nbFqBWJ,,journalists nations largest newspaper chain nervous,,51,,26,,1547604067,,2019-01-15 21:01:07
@cnn,,CNN,,The British pound shrugged off a dramatic vote in the UK parliament that left the government's Brexit plans in tattershttps://cnn.it/2FyDISt ,,british pound shrugged dramatic vote uk parliament left governments brexit plans,,91,,52,,1547603463,,2019-01-15 20:51:03
@cnn,,CNN,,7 key takeaways from William Barr's attorney general confirmation hearing | Analysis by @CillizzaCNN https://cnn.it/2Fzz06U pic.twitter.com/0HXOlIFfM7,,7 key takeaways william barrs attorney general confirmation hearing  analysis cillizzacnn,,56,,23,,1547602902,,2019-01-15 20:41:42
@cnn,,CNNnewsroom,,"This was a scale of defeat that doubled the prediction of even the worst predicted." Chief International Anchor @camanpour on Theresa May's Brexit deal failure https://cnn.it/2VSnPfi pic.twitter.com/0SbnnPWAfh,,this scale defeat doubled prediction even worst predicted chief international anchor camanpour theresa mays brexit deal failure,,169,,86,,1547601695,,2019-01-15 20:21:35
@cnn,,CNN,,How to keep AI from turning into the Terminator https://cnn.it/2FCx6lZ  (via @CNNOpinion)pic.twitter.com/pH4EUAft0C,,keep ai turning terminator via cnnopinionpictwittercomph4euaft0c,,107,,35,,1547602383,,2019-01-15 20:33:03
@cnn,,cnni,,Tonight's #BrexitVote in Parliament is the biggest defeat for any British government in modern history. The previous record was a 166-vote loss in 1924.  118 Conservative MPs voted against Prime Minister Theresa May -- a massive rebellion.https://cnn.it/2FywSMS ,,tonights brexitvote parliament biggest defeat british government modern history previous record 166vote loss 1924  118 conservative mps voted prime minister theresa may  massive,,298,,245,,1547601993,,2019-01-15 20:26:33
@cnn,,CNN,,Former Pepsi CEO tops White House shortlist for World Bank https://cnn.it/2FBo8p1 pic.twitter.com/l5sxL18FKq,,former pepsi ceo tops white house shortlist world bank,,102,,47,,1547601965,,2019-01-15 20:26:05
@cnn,,CNN,,With a wildly flailing president, it's up to Congress to end the shutdown, writes Charlie Dent for @CNNOpinion https://cnn.it/2FzKur3 pic.twitter.com/l8WmtrJrGo,,wildly flailing president congress end shutdown writes charlie dent cnnopinion,,270,,89,,1547601544,,2019-01-15 20:19:04
@cnn,,cnni,,After #BrexitVote, the President of the European Commission warns the UK, "time is almost up."https://cnn.it/2DbEQtz ,,brexitvote president european commission warns uk time almost,,175,,105,,1547601310,,2019-01-15 20:15:10
@cnn,,CNN,,A federal judge has denied a request from a federal employees union to require the government to pay air traffic controllers who are currently working without pay during the partial government shutdown https://cnn.it/2FBmIen pic.twitter.com/SbfMqKOjzP,,federal judge denied request federal employees union require government pay air traffic controllers currently working without pay partial government shutdown,,113,,97,,1547601125,,2019-01-15 20:12:05
@cnn,,CNN,,After a defeat for Theresa May's Brexit deal, possible scenarios include: attempted renegotiation with the EU, extending article 50, general election, change of prime minister, second EU referendum, scrapping Brexit altogether, or crashing out with no dealhttps://cnn.it/2FBEpun ,,defeat theresa mays brexit deal possible scenarios include attempted renegotiation eu extending article 50 general election change prime minister second eu referendum scrapping brexit altogether crashing,,435,,286,,1547600841,,2019-01-15 20:07:21
@cnn,,CNN,,The Supreme Court has bolstered a federal law aimed at enhancing sentences for repeat offenders of serious crimes https://cnn.it/2Dcr1uM pic.twitter.com/5LyN4Ba7rL,,supreme court bolstered federal law aimed enhancing sentences repeat offenders serious crimes,,78,,30,,1547600706,,2019-01-15 20:05:06
@cnn,,CNN,,Just after Theresa May's Brexit deal is crushed by a record margin, opposition leader Jeremy Corbyn confirms he has put forward a no-confidence vote in the government https://cnn.it/2FuuRCe  #BrexitVotepic.twitter.com/0boPQLchbA,,theresa mays brexit deal crushed record margin opposition leader jeremy corbyn confirms put forward noconfidence vote government brexitvotepictwittercom0bopqlchba,,839,,487,,1547600284,,2019-01-15 19:58:04
@cnn,,CNN,,Women could boost the global economy, but outdated laws are holding them back, write Jamille Bigio and Rachel Vogelstein for @CNNBusiness Perspectives https://cnn.it/2FArmsU pic.twitter.com/bHKsxHhpVa,,women could boost global economy outdated laws holding back write jamille bigio rachel vogelstein cnnbusiness perspectives,,89,,37,,1547600282,,2019-01-15 19:58:02
@cnn,,cnni,,The #BrexitVote result is the worst parliamentary defeat for a British government in the modern erahttps://cnn.it/2Db8dMP ,,brexitvote result worst parliamentary defeat british government modern,,925,,663,,1547599848,,2019-01-15 19:50:48
@cnn,,CNN,,GOP Rep. Steve King faces growing pressure to resign — including from Republicans https://cnn.it/2FFqWBR pic.twitter.com/aMZJaproPA,,gop rep steve king faces growing pressure resign — including republicans,,296,,69,,1547599865,,2019-01-15 19:51:05
@cnn,,CNN,,BREAKING NEWS: Theresa May's Brexit plan is crushed by 432 votes to 202 in Parliament -- a record margin https://cnn.it/2RKTwbn pic.twitter.com/S0k5kVGPlF,,breaking news theresa mays brexit plan crushed 432 votes 202 parliament  record margin,,873,,558,,1547599455,,2019-01-15 19:44:15
@cnn,,CNN,,JUST IN: Democratic Sen. Kirsten Gillibrand is expected to enter the 2020 presidential race on Tuesday, two sources with knowledge of her plans tell CNN https://cnn.it/2FBisvp pic.twitter.com/5jn1xe5gGw,,in democratic sen kirsten gillibrand expected enter 2020 presidential race tuesday two sources knowledge plans tell cnn,,289,,99,,1547599444,,2019-01-15 19:44:04
@cnn,,CNN,,Saudi teen granted asylum in Canada says she's one of the lucky women who escaped https://cnn.it/2FAopsk pic.twitter.com/BtX2u5v4R8,,saudi teen granted asylum canada says one lucky women escaped,,377,,76,,1547599027,,2019-01-15 19:37:07
@cnn,,CNN,,Chef José Andrés is serving free meals daily to furloughed federal workers in Washington https://cnn.it/2Dbt6Hr pic.twitter.com/Ul11xs4pJd,,chef josé andrés serving free meals daily furloughed federal workers washington,,361,,88,,1547598604,,2019-01-15 19:30:04
@cnn,,CNN,,British lawmakers are voting on Theresa May's Brexit deal now: https://edition.cnn.com/uk/live-news/brexit-theresa-may-deal-vote-gbr-intl/index.html …pic.twitter.com/1VmWWOdL4f,,british lawmakers voting theresa mays brexit deal now,,88,,44,,1547598600,,2019-01-15 19:30:00
@cnn,,CNN,,Pyschologists -- and Gillette -- are right about 'traditional masculinity' | Noah Berlatsky for @CNNopinion https://cnn.it/2FA1VYu pic.twitter.com/LmPBxggvgT,,pyschologists  gillette  right traditional masculinity  noah berlatsky cnnopinion,,337,,77,,1547598005,,2019-01-15 19:20:05
@cnn,,CNN,,Microsoft and Walgreens join forces to take on Amazon in health care https://cnn.it/2Db1FgR pic.twitter.com/2thrK3gNPN,,microsoft walgreens join forces take amazon health care,,136,,45,,1547597404,,2019-01-15 19:10:04
@cnn,,CNN,,Italy's first ever Mormon temple opened this week, just a few miles from the Vatican https://cnn.it/2FARF2j pic.twitter.com/XAf0WXPjSy,,italys first ever mormon temple opened week miles vatican,,176,,65,,1547596200,,2019-01-15 18:50:00
@cnn,,CNN,,Ford's new GT500 is its most powerful car ever https://cnn.it/2HgOQG2 pic.twitter.com/Yq6Damqy3O,,fords new gt500 powerful car ever,,450,,134,,1547595600,,2019-01-15 18:40:00
@cnn,,CNN,,This artist is trying to make Toto's "Africa" play for eternity in the middle of the Namibian deserthttps://cnn.it/2FzzERP ,,artist trying make totos africa play eternity middle namibian,,584,,198,,1547595006,,2019-01-15 18:30:06
@cnn,,CNN,,Honduran officials threaten prison time for migrant parents who travel illegally with minors https://cnn.it/2FBaaDN pic.twitter.com/rPhyJangWI,,honduran officials threaten prison time migrant parents travel illegally minors,,99,,31,,1547594405,,2019-01-15 18:20:05
@cnn,,CNN,,President Trump's attorney general nominee William Barr says a "barrier" on the US-Mexico border is a "critical part of border security." https://cnn.it/2RMW8FG pic.twitter.com/iCrfLBSOvk,,president trumps attorney general nominee william barr says barrier usmexico border critical part border security,,185,,61,,1547594167,,2019-01-15 18:16:07
@cnn,,CNN,,Special counsel Robert Mueller says former Trump campaign official Rick Gates' cooperation continues, a possible sign the investigation isn't done yet https://cnn.it/2Fyconc pic.twitter.com/hv0mEok1Ll,,special counsel robert mueller says former trump campaign official rick gates cooperation continues possible sign investigation done yet,,209,,60,,1547593807,,2019-01-15 18:10:07
@cnn,,CNN,,How Alexa knows the difference between a breaking window and a wine glass https://cnn.it/2FxAjU1 pic.twitter.com/Or1XvDGqPS,,alexa knows difference breaking window wine glass,,89,,34,,1547593207,,2019-01-15 18:00:07
@cnn,,CNN,,The long-awaited 2020 Toyota Supra is here. It features 335 horsepower and can go from zero to 60 miles per hour in 4.1 seconds. https://cnn.it/2VM2J26 pic.twitter.com/AjsFSf0VE1,,longawaited 2020 toyota supra here features 335 horsepower go zero 60 miles per hour 41 seconds,,446,,162,,1547592600,,2019-01-15 17:50:00
@cnn,,CNN,,President Trump is considering recognizing Venezuela's opposition leader as the legitimate president of the country, three sources familiar with the matter tell CNN https://cnn.it/2DcaWoU pic.twitter.com/rYvUSKJjJZ,,president trump considering recognizing venezuelas opposition leader legitimate president country three sources familiar matter tell cnn,,153,,98,,1547592006,,2019-01-15 17:40:06
@cnn,,CNN,,Attorney General nominee William Barr: "I will not be bullied into doing anything I think is wrong by anybody whether it be editorial boards or Congress or the President. I am going to do what I think is right." https://cnn.it/2Fze2Fe pic.twitter.com/AvOLoj5aCj,,attorney general nominee william barr i bullied anything think wrong anybody whether editorial boards congress president going think right,,200,,37,,1547591410,,2019-01-15 17:30:10
@cnn,,CNN,,China might just have grown the first plant ever on the moon https://cnn.it/2Dd6GFT pic.twitter.com/o01Qd9Te6t,,china might grown first plant ever moon,,427,,142,,1547590805,,2019-01-15 17:20:05
@cnn,,CNN,,At least 1,500 GoFundMe pages have been set up by furloughed government employees looking for help. Together, the campaigns so far have raised more than $300,000. https://cnn.it/2FAIEpL pic.twitter.com/aX4gluotxi,,least 1500 gofundme pages set furloughed government employees looking help together campaigns far raised 300000,,221,,108,,1547590204,,2019-01-15 17:10:04
@cnn,,CNNPolitics,,Asked why he'd want to lead the Justice Department given Trump's constant attacks on it and intelligence agencies, Barr says: ”I think they are critical institutions that are essential to preserving the rule of law, which is the heartbeat of this country" https://cnn.it/2FuX8Z3 pic.twitter.com/vG8vUrVGTf,,asked hed want lead justice department given trumps constant attacks intelligence agencies barr says ”i think critical institutions essential preserving rule law heartbeat country,,133,,57,,1547588616,,2019-01-15 16:43:36
@cnn,,CNN,,William Barr's reassurances about Mueller leave a lot of legal wiggle room | Michael Zeldin for @CNNopinion https://cnn.it/2FAU5xJ pic.twitter.com/GA0yArT4Je,,william barrs reassurances mueller leave lot legal wiggle room  michael zeldin cnnopinion,,77,,34,,1547589606,,2019-01-15 17:00:06
@cnn,,CNN,,Chef José Andrés is serving free meals daily to furloughed federal workers in Washington https://cnn.it/2DbSwVp pic.twitter.com/qXqAf5SLog,,chef josé andrés serving free meals daily furloughed federal workers washington,,827,,186,,1547589008,,2019-01-15 16:50:08
@cnn,,CNN,,Thousands of people in fire devastated areas of California are under evacuation orders as a series of storms is expected to bring heavy rain, extreme winds and deep snow through the week https://cnn.it/2Da1xOH pic.twitter.com/FcgBCbVpkG,,thousands people fire devastated areas california evacuation orders series storms expected bring heavy rain extreme winds deep snow week,,130,,65,,1547588406,,2019-01-15 16:40:06
@cnn,,CNN,,Sen. Bernie Sanders will meet on Wednesday with former staff members who alleged they faced harassment and sexism on his 2016 campaign https://cnn.it/2FxTyfY pic.twitter.com/2FxWJgz4B1,,sen bernie sanders meet wednesday former staff members alleged faced harassment sexism 2016 campaign,,119,,33,,1547588129,,2019-01-15 16:35:29
@cnn,,CNN,,Italy's first ever Mormon temple opened this week, just a few miles from the Vatican https://cnn.it/2FARF2j pic.twitter.com/SXlWQUyr7K,,italys first ever mormon temple opened week miles vatican,,198,,61,,1547587495,,2019-01-15 16:24:55
@cnn,,CNN,,Sen. Lindsey Graham: “Do you believe Attorney General Sessions had a conflict because he worked on the Trump campaign?”  Attorney General nominee William Barr: “I think he probably did the right thing recusing himself” from the Mueller investigation https://cnn.it/2RMW8FG pic.twitter.com/T0I2yCGNsU,,sen lindsey graham “do believe attorney general sessions conflict worked trump campaign”  attorney general nominee william barr “i think probably right thing recusing himself” mueller investigation,,350,,91,,1547586720,,2019-01-15 16:12:00
@cnn,,CNN,,AG nominee William Barr: "President Trump has sought no assurances, promises, or commitments from me of any kind, either express or implied, and I have not given him any, other than that I would run the department with professionalism and integrity" https://cnn.it/2RMW8FG pic.twitter.com/wc0MCdF7rE,,ag nominee william barr president trump sought assurances promises commitments kind either express implied given any would run department professionalism integrity,,290,,96,,1547586122,,2019-01-15 16:02:02
@cnn,,CNN,,Netflix is raising prices in the United States. All three of the company's plans will increase in price by $1-$2. The standard $11 plan will increase to $13 per month. https://cnn.it/2DaF6ZH pic.twitter.com/4FEcztdZIA,,netflix raising prices united states three companys plans increase price 12 standard 11 plan increase 13 per month,,150,,139,,1547585407,,2019-01-15 15:50:07
@cnn,,CNN,,82 (and counting) very real direct effects of the partial government shutdown https://cnn.it/2FB10Hk pic.twitter.com/9Wwpbz6KTD,,82 and counting real direct effects partial government shutdown,,99,,55,,1547584991,,2019-01-15 15:43:11
@cnn,,CNN,,President Trump's attorney general pick William Barr: “I don't believe Mr. Mueller would be involved in a witch hunt.” https://cnn.it/2RMW8FG pic.twitter.com/JUexBX4ujF,,president trumps attorney general pick william barr “i believe mr mueller would involved witch hunt”,,329,,115,,1547584442,,2019-01-15 15:34:02
@cnn,,CNN,,JUST IN: A federal judge in New York has struck down the Trump administration's proposal to reintroduce a citizenship question into the 2020 census https://cnn.it/2DbSpJK pic.twitter.com/tOe9pwyueU,,in federal judge new york struck trump administrations proposal reintroduce citizenship question 2020 census,,603,,167,,1547583647,,2019-01-15 15:20:47
@cnn,,CNNPolitics,,“On my watch, Bob will be allowed to finish his work,” Trump attorney general pick Bill Barr says of the special counsel’s ongoing Russia investigation https://cnn.it/2Da0heG pic.twitter.com/xSHXFS3dmo,,“on watch bob allowed finish work” trump attorney general pick bill barr says special counsel’s ongoing russia investigation,,212,,48,,1547583181,,2019-01-15 15:13:01
@cnn,,CNN,,Trump attorney general nominee Bill Barr says he thinks it’s “vitally important” that special counsel Robert Mueller should be allowed to complete his Russia investigation.  Follow live updates: http://cnn.it/2Da0heG pic.twitter.com/rP70v4I8fD,,trump attorney general nominee bill barr says thinks it’s “vitally important” special counsel robert mueller allowed complete russia investigation  follow live updates,,386,,75,,1547583479,,2019-01-15 15:17:59
@cnn,,CNN,,From now until March, up to 120 million pilgrims are expected to descend on Prayagraj in India's northern Uttar Pradesh state for the Kumbh Mela https://cnn.it/2RKqicF pic.twitter.com/BdhPWLSk9Q,,march 120 million pilgrims expected descend prayagraj indias northern uttar pradesh state kumbh mela,,274,,81,,1547582831,,2019-01-15 15:07:11
@cnn,,CNN,,William Barr, President Trump's attorney general pick, is testifying at his confirmation hearing. If confirmed, Barr is the man who will decide the fate of the Mueller investigation.  Watch on CNN: http://CNN.it/go  Follow live updates: https://cnn.it/2Fz1NZf pic.twitter.com/RdaGE627Y1,,william barr president trumps attorney general pick testifying at his confirmation hearing confirmed barr man decide fate mueller investigation  watch cnn follow live updates,,220,,79,,1547582186,,2019-01-15 14:56:26
@cnn,,CNN,,5 numbers that prove the Mueller probe isn't a 'big fat hoax' | Analysis by @CillizzaCNN https://cnn.it/2FyIJuc pic.twitter.com/MUUp3saZ3i,,5 numbers prove mueller probe big fat hoax  analysis cillizzacnn,,366,,111,,1547582117,,2019-01-15 14:55:17
@cnn,,CNN,,After being closed for two years to allow its diminishing golden jellyfish population to recover, Ongeim'l Tketau Jellyfish Lake -- one of Palau's most famous attractions -- has reopened http://cnn.it/2FAQwb8 pic.twitter.com/tciw5Rpvk7,,closed two years allow diminishing golden jellyfish population recover ongeiml tketau jellyfish lake  one palaus famous attractions  reopened,,531,,139,,1547581338,,2019-01-15 14:42:18
@cnn,,CNN,,Stormy Daniels is suing several members of the Columbus, Ohio, police department's vice unit for civil rights violations over her arrest last year at a strip club in the cityhttps://cnn.it/2FxzIBM ,,stormy daniels suing several members columbus ohio police departments vice unit civil rights violations arrest last year strip club,,414,,82,,1547580469,,2019-01-15 14:27:49
@cnn,,CNNnewsroom,,"Keep in mind this essential fact: President Trump fired his previous Attorney General Jeff Sessions for failing to rein in the Mueller probe and is now, likely, replacing him with someone who called a central part of that investigation 'fatally misconceived'" @jimsciutto on Barrpic.twitter.com/HtL3OAmSDt,,keep mind essential fact president trump fired previous attorney general jeff sessions failing rein mueller probe now likely replacing someone called central part investigation fatally misconceived jimsciutto barrpictwittercomhtl3oamsdt,,602,,294,,1547579268,,2019-01-15 14:07:48
@cnn,,CNN,,Delta's CEO says the government shutdown is costing the airline $25 million a month https://cnn.it/2D9MRz5 pic.twitter.com/BLRKxompTD,,deltas ceo says government shutdown costing airline 25 million month,,341,,238,,1547579462,,2019-01-15 14:11:02
@cnn,,CNN,,Multiple law enforcement agencies including an anti-terror unit are responding to a shooting at a hotel in the Kenyan capital of Nairobi, a police spokesman tells local news outletshttps://cnn.it/2DawguZ ,,multiple law enforcement agencies including antiterror unit responding shooting hotel kenyan capital nairobi police spokesman tells local news,,198,,167,,1547578744,,2019-01-15 13:59:04
@cnn,,CNN,,With just hours until the vote on Theresa May's Brexit deal, protesters are out in force outside UK Parliament https://cnn.it/2Fya1Ru pic.twitter.com/5faoABQCp5,,hours vote theresa mays brexit deal protesters force outside uk parliament,,155,,77,,1547578578,,2019-01-15 13:56:18
@cnn,,CNNBusiness,,CNN's @ChristineRomans has the day's top business headlines before the opening bell on Wall Street https://cnn.it/2RSeW68 pic.twitter.com/m6uvadL28G,,cnns christineromans days top business headlines opening bell wall street,,36,,10,,1547577300,,2019-01-15 13:35:00
@cnn,,NewDay,,William Barr is set to sit soon for his second confirmation hearing for attorney general.  @JohnAvlon digs into the archives — and explores why then-Sen. Joe Biden’s comments on “separation of powers” remains the question three decades later https://cnn.it/2QMJfGV  #RealityCheckpic.twitter.com/FaGaiNgNJC,,william barr set sit soon second confirmation hearing attorney general  johnavlon digs archives — explores thensen joe biden’s comments “separation powers” remains question three decades later realitycheckpictwittercomfagaingnjc,,102,,44,,1547576962,,2019-01-15 13:29:22
@cnn,,CNN,,"Some of the things we felt comfortable saying and joking about back then, we now understand is not acceptable"https://cnn.it/2Fy4URi ,,some things felt comfortable saying joking back then understand,,1193,,216,,1547577006,,2019-01-15 13:30:06
@cnn,,CNN,,Ahead of today's parliamentary vote on Prime Minister Theresa May's Brexit deal, it's time to go back to basics -- here's everything you need to know about the divorce between the EU and the UK: https://cnn.it/2D7WGgW pic.twitter.com/XyIxmdwPUg,,ahead todays parliamentary vote prime minister theresa mays brexit deal time go back basics  heres everything need know divorce eu uk,,143,,91,,1547576380,,2019-01-15 13:19:40
@cnn,,NewDay,,Former Director of National Intelligence James Clapper says “Americans should be very concerned” about the Washington Post report that there are no notes from the meetings between President Trump and Putin https://cnn.it/2ClGSpy pic.twitter.com/IRt8YN95YB,,former director national intelligence james clapper says “americans concerned” washington post report notes meetings president trump putin,,587,,207,,1547574261,,2019-01-15 12:44:21
@cnn,,CNN,,America loves to praise Martin Luther King Jr. But we ignore his message. | Peniel Joseph for @CNNopinion https://cnn.it/2Dat96h pic.twitter.com/dy60ihE7F6,,america loves praise martin luther king jr ignore message  peniel joseph cnnopinion,,518,,201,,1547575807,,2019-01-15 13:10:07
@cnn,,CNN,,Antarctica ice melt has accelerated by 280% in the last four decades, researchers say. A pair of new studies share a same ominous message -- that our planet's ice is melting at an alarming rate, which is bad news for global sea levels https://cnn.it/2DaEXFH ,,antarctica ice melt accelerated 280 last four decades researchers say pair new studies share ominous message  planets ice melting alarming rate bad news global sea levels,,540,,405,,1547575324,,2019-01-15 13:02:04
@cnn,,CNN,,Legendary and beloved Broadway star Carol Channing has died, her publicist confirms. She was 97. https://cnn.it/2D9Nhpo pic.twitter.com/KquLQTkaqU,,legendary beloved broadway star carol channing died publicist confirms 97,,1139,,522,,1547574265,,2019-01-15 12:44:25
@cnn,,NewDay,,Sen. @maziehirono says she “wants to get a very firm commitment from Mr. Barr that he will not interfere with the Mueller investigation in any way, shape or form” during the Senate confirmation hearing questioning of Trump AG nominee William Barr today. https://cnn.it/2RRCaJK pic.twitter.com/M21CBExkkp,,sen maziehirono says “wants get firm commitment mr barr interfere mueller investigation way shape form” senate confirmation hearing questioning trump ag nominee william barr today,,474,,147,,1547573636,,2019-01-15 12:33:56
@cnn,,CNN,,Sen. Bernie Sanders will meet on Wednesday with former staff members who alleged they faced harassment and sexism on his 2016 campaign https://cnn.it/2DbzIG4 pic.twitter.com/zD8368xESf,,sen bernie sanders meet wednesday former staff members alleged faced harassment sexism 2016 campaign,,107,,48,,1547573891,,2019-01-15 12:38:11
@cnn,,CNN,,The question that could plague Democrats in 2020 | Analysis by @RonBrownstein https://cnn.it/2DbAvXm pic.twitter.com/4DyDw2PIhy,,question could plague democrats 2020  analysis ronbrownstein,,70,,48,,1547573407,,2019-01-15 12:30:07
@cnn,,CNN,,The Kremlin has slammed speculation that President Trump conspired with Russian President Vladimir Putin, saying that the current controversies roiling the Trump administration reflect larger rifts in American society https://cnn.it/2Db0XR2 pic.twitter.com/zf4351JvHB,,kremlin slammed speculation president trump conspired russian president vladimir putin saying current controversies roiling trump administration reflect larger rifts american society,,155,,82,,1547572805,,2019-01-15 12:20:05
@cnn,,CNN,,Thousands of people in fire devastated areas of California are under evacuation orders as a series of storms is expected to bring heavy rain, extreme winds and deep snow through the week https://cnn.it/2FyY9i2 pic.twitter.com/yrKWltLsgK,,thousands people fire devastated areas california evacuation orders series storms expected bring heavy rain extreme winds deep snow week,,105,,110,,1547572208,,2019-01-15 12:10:08
@cnn,,NewDay,,Rep. Steve King has been removed from committee assignments following racist remarks.   “There was a lot of pressure on leading Republicans to take action and to show they weren’t just going to sweep this under the rug,” @ToulouseO says. https://cnn.it/2FDMqi6 pic.twitter.com/j2QfvJeFtP,,rep steve king removed committee assignments following racist remarks   “there lot pressure leading republicans take action show weren’t going sweep rug” toulouseo says,,238,,56,,1547571459,,2019-01-15 11:57:39
@cnn,,CNN,,5 things for Tuesday:  - Russia investigation - Brexit - Jayme Closs - Government shutdown - Opioid deaths  https://cnn.it/2DbIX8Y pic.twitter.com/tXJ5vsqPS9,,5 things tuesday   russia investigation  brexit  jayme closs  government shutdown  opioid deaths,,126,,64,,1547571608,,2019-01-15 12:00:08
@cnn,,CNN,,From now until March, up to 120 million pilgrims -- nearly double the population of the UK or France -- are expected to descend on Prayagraj in India's northern Uttar Pradesh state for the Kumbh Melahttps://cnn.it/2FwVSEa ,,march 120 million pilgrims  nearly double population uk france  expected descend prayagraj indias northern uttar pradesh state kumbh,,112,,55,,1547571002,,2019-01-15 11:50:02
@cnn,,CNN,,Banning skin bleaching products won't work as long as fair skin is linked with beauty and success | Ola Brown for @CNNhealth https://cnn.it/2FBsFYv pic.twitter.com/5medwBLg8f,,banning skin bleaching products work long fair skin linked beauty success  ola brown cnnhealth,,184,,102,,1547570406,,2019-01-15 11:40:06
@cnn,,CNN,,Facebook plans to invest $300 million in journalism programs https://cnn.it/2DbvUo8 pic.twitter.com/7Ncpkwj9fd,,facebook plans invest 300 million journalism programs,,127,,65,,1547569815,,2019-01-15 11:30:15
@cnn,,CNN,,Los Angeles teachers union calls for 'massive presence' on day 2 of strike https://cnn.it/2DbuABM pic.twitter.com/cWFXVnJaBN,,los angeles teachers union calls massive presence day 2 strike,,155,,82,,1547569204,,2019-01-15 11:20:04
@cnn,,CNN,,President Trump has boxed himself in on the shutdown with nowhere to go | Analysis by @ForecasterEnten https://cnn.it/2Fyejs0 pic.twitter.com/fY2yYGAhbF,,president trump boxed shutdown nowhere go  analysis forecasterenten,,226,,106,,1547568788,,2019-01-15 11:13:08
@cnn,,CNN,,Banning skin bleaching products won't work as long as fair skin is linked with beauty and success, writes @naijaflyingdr for @CNNopinion: https://cnn.it/2Fydy28 pic.twitter.com/8zj2SA3Tqw,,banning skin bleaching products work long fair skin linked beauty success writes naijaflyingdr cnnopinion,,209,,132,,1547568705,,2019-01-15 11:11:45
@cnn,,CNN,,Despite US warning, Iran launches satellite and fails https://cnn.it/2DaPHns pic.twitter.com/kQ8nDy9eJN,,despite us warning iran launches satellite fails,,110,,77,,1547568197,,2019-01-15 11:03:17
@cnn,,CNN,,China is the world's top executioner, according to Amnesty International, sentencing thousands to death every year. But it rarely executes Westerners.https://cnn.it/2FB1DAD ,,china worlds top executioner according amnesty international sentencing thousands death every year rarely executes,,145,,107,,1547567697,,2019-01-15 10:54:57
@cnn,,CNN,,Some of the most gorgeous "Game of Thrones" filming locations are in Spain https://cnn.it/2Dbdh3x pic.twitter.com/swuD4yMyeH,,gorgeous game thrones filming locations spain,,913,,259,,1547567126,,2019-01-15 10:45:26
@cnn,,cnni,,Theresa May's aides in Downing Street are scrambling to ensure the Prime Minister looks in command of events, even if she loses today's vote badly. | @janemerrick23 for @CNNopinion https://cnn.it/2FxjZTb ,,theresa mays aides downing street scrambling ensure prime minister looks command events even loses todays vote badly  janemerrick23 cnnopinion,,82,,26,,1547566926,,2019-01-15 10:42:06
@cnn,,CNN,,Gillette's newest advertisement addresses serious issues like toxic masculinity, sexual harassment and #metoohttps://cnn.it/2FxMznq ,,gillettes newest advertisement addresses serious issues like toxic masculinity sexual harassment,,1531,,434,,1547566632,,2019-01-15 10:37:12
@cnn,,CNN,,Authorities in the Thai capital Bangkok are to deploy planes with special 'rainmaking' capabilities to ease pollution in parts of the cityhttps://cnn.it/2DcrLAp ,,authorities thai capital bangkok deploy planes special rainmaking capabilities ease pollution parts,,137,,98,,1547566125,,2019-01-15 10:28:45
@cnn,,CNN,,India's military is facing a widespread catfishing problem, an army chief has revealed, after an Indian soldier was "honey trapped" into giving sensitive information to a fake Pakistani Facebook accounthttps://cnn.it/2DbB6Z9 ,,indias military facing widespread catfishing problem army chief revealed indian soldier honey trapped giving sensitive information fake pakistani facebook,,119,,64,,1547565735,,2019-01-15 10:22:15
@cnn,,CNN,,Canada's foreign ministry issued a travel warning to its citizens in China over "the risk of arbitrary enforcement of local laws" https://cnn.it/2Fx6K50 ,,canadas foreign ministry issued travel warning citizens china the risk arbitrary enforcement local laws,,140,,85,,1547565161,,2019-01-15 10:12:41
@cnn,,CNN,,A Canadian citizen in China has been sentenced to death for drug smuggling. The ruling comes as relations have strained between the two countries following the arrest of a senior executive from Chinese tech firm Huawei in Vancouver last month.https://cnn.it/2DaNmcs ,,canadian citizen china sentenced death drug smuggling ruling comes relations strained two countries following arrest senior executive chinese tech firm huawei vancouver last,,260,,91,,1547564583,,2019-01-15 10:03:03
@cnn,,CNN,,The biggest pilgrimage on the planet has kicked off in Indiahttps://cnn.it/2Dbmrx2 ,,biggest pilgrimage planet kicked,,142,,78,,1547564100,,2019-01-15 09:55:00
@cnn,,CNN,,She was shot and killed in a case of mistaken identityhttps://cnn.it/2Dbyw5i ,,shot killed case mistaken,,187,,104,,1547563540,,2019-01-15 09:45:40
@cnn,,CNN,,The abandoned Soviet-era spas a community of refugees calls home https://cnn.it/2FDRgfF pic.twitter.com/nkXpvkvlq6,,abandoned sovietera spas community refugees calls home,,170,,71,,1547563165,,2019-01-15 09:39:25
@cnn,,CNN,,"We have 46, 45, 50 students in a class. It's unacceptable," says one veteran teacher.https://cnn.it/2DaGR9v ,,we 46 45 50 students class unacceptable says one veteran,,314,,116,,1547562597,,2019-01-15 09:29:57
@cnn,,CNN,,Democratic lawmakers are discussing how to make the interpreters in Trump's meetings with Putin appear before them to learn what transpired amid reports the US President has worked to keep the content of his huddles with Putin a secret https://cnn.it/2FDxCQy pic.twitter.com/m60f43GhSI,,democratic lawmakers discussing make interpreters trumps meetings putin appear learn transpired amid reports us president worked keep content huddles putin secret,,318,,137,,1547562038,,2019-01-15 09:20:38
@cnn,,CNN,,Luxembourg has announced plans to make all public transportation free from March 2020. With a population of about 600,000 people, the landlocked country is one of the richest -- and smallest -- nations in Europe, and it suffers from major traffic jams. https://cnn.it/2DaHPTe pic.twitter.com/VL6QPIdlnE,,luxembourg announced plans make public transportation free march 2020 population 600000 people landlocked country one richest  smallest  nations europe suffers major traffic jams,,386,,154,,1547561489,,2019-01-15 09:11:29
@cnn,,CNN,,Kim Kardashian West has confirmed that her fourth child with Kanye West will be a baby boyhttps://cnn.it/2D9jtJh ,,kim kardashian west confirmed fourth child kanye west baby,,429,,90,,1547560976,,2019-01-15 09:02:56
@cnn,,CNN,,Antarctica ice melt has accelerated by 280% in the last four decades, researchers say. A pair of new studies share a same ominous message -- that our planet's ice is melting at an alarming rate, which is bad news for global sea levels https://cnn.it/2FD7BBf ,,antarctica ice melt accelerated 280 last four decades researchers say pair new studies share ominous message  planets ice melting alarming rate bad news global sea levels,,270,,219,,1547560848,,2019-01-15 09:00:48
@cnn,,CNN,,More than 40,000 immigration hearings have been canceled because of the partial government shutdown, according to a new reporthttps://cnn.it/2FyFd2W ,,40000 immigration hearings canceled partial government shutdown according new,,160,,135,,1547560302,,2019-01-15 08:51:42
@cnn,,CNN,,The Killers cover political topics from the border wall to mass incarceration in their new song "Land of the Free" https://cnn.it/2DbpHse pic.twitter.com/FOc0NoL60U,,killers cover political topics border wall mass incarceration new song land free,,173,,77,,1547559756,,2019-01-15 08:42:36
@cnn,,CNN,,More than a dozen senators met Monday evening in a bipartisan effort to talk their way out of the government shutdown. "It was rough going," one source said.https://cnn.it/2FyVi8M ,,dozen senators met monday evening bipartisan effort talk way government shutdown it rough going one source,,153,,87,,1547559200,,2019-01-15 08:33:20
@cnn,,CNN,,Stormy Daniels is suing several members of the Columbus, Ohio, police department's vice unit for civil rights violations over her arrest last year at a strip club in the cityhttps://cnn.it/2DbdB2u ,,stormy daniels suing several members columbus ohio police departments vice unit civil rights violations arrest last year strip club,,255,,74,,1547558743,,2019-01-15 08:25:43
@cnn,,CNN,,This past weekend, Canadian air traffic controllers ordered hundreds of pizzas for their American counterparts working without pay due to the ongoing US government shutdown https://cnn.it/2Dbntcm pic.twitter.com/BJTq4otwzn,,past weekend canadian air traffic controllers ordered hundreds pizzas american counterparts working without pay due ongoing us government shutdown,,474,,140,,1547558283,,2019-01-15 08:18:03
@cnn,,CNN,,Three children who were playing outside climbed into an unplugged chest freezer and died after the lid closed and they were unable to get out, a sheriff in northern Florida saidhttps://cnn.it/2FBivYe ,,three children playing outside climbed unplugged chest freezer died lid closed unable get out sheriff northern florida,,176,,140,,1547557727,,2019-01-15 08:08:47
@cnn,,CNN,,5 numbers that prove the Mueller probe isn't a 'big fat hoax' | Analysis by @CillizzaCNN https://cnn.it/2FzK2Ju pic.twitter.com/fMjJAvD2ep,,5 numbers prove mueller probe big fat hoax  analysis cillizzacnn,,173,,90,,1547557353,,2019-01-15 08:02:33
@cnn,,CNN,,Attorney General nominee William Barr shared a controversial memo last year with nearly all of President Trump's lawyers concluding that an aspect of special counsel Robert Mueller's case could be "fatally misconceived," Barr acknowledgedhttps://cnn.it/2FCXGvv ,,attorney general nominee william barr shared controversial memo last year nearly president trumps lawyers concluding aspect special counsel robert muellers case could fatally misconceived barr,,97,,77,,1547556865,,2019-01-15 07:54:25
@cnn,,CNN,,A black lawmaker who resigned in Vermont "was a victim of racial harassment," the state's attorney general said, but the case won't be prosecuted because of the First Amendment https://cnn.it/2DbcQ9i pic.twitter.com/zn9WdEHgob,,black lawmaker resigned vermont was victim racial harassment states attorney general said case prosecuted first amendment,,119,,113,,1547556369,,2019-01-15 07:46:09
@cnn,,CNN,,Jayme Closs told authorities she heard her father get shot and saw her mother die, in an account released by prosecutors. The 13-year-old was held for 88 days, sometimes trapped under her kidnapper's bed. https://cnn.it/2FAIcb9 pic.twitter.com/uKvRxMRpuO,,jayme closs told authorities heard father get shot saw mother die account released prosecutors 13yearold held 88 days sometimes trapped kidnappers bed,,156,,81,,1547555877,,2019-01-15 07:37:57
@cnn,,CNN,,A photo of an ordinary, brown egg has broken Kylie Jenner's record for most-liked Instagram photo http://cnn.it/2suXO8c pic.twitter.com/9kUHy1w61y,,photo ordinary brown egg broken kylie jenners record mostliked instagram photo,,430,,143,,1547555460,,2019-01-15 07:31:00
@cnn,,CNN,,President Trump is personally paying for the fast food meals provided to the Clemson University football team during their national championship celebration at the White House https://cnn.it/2D9ZWIF pic.twitter.com/CuILnnagRu,,president trump personally paying fast food meals provided clemson university football team national championship celebration white house,,309,,96,,1547555358,,2019-01-15 07:29:18
@cnn,,CNN,,After being closed for two years to allow its diminishing golden jellyfish population to recover, Ongeim'l Tketau Jellyfish Lake -- one of Palau's most famous attractions -- has reopened http://cnn.it/2FAQwb8 pic.twitter.com/IDIn4w2D2T,,closed two years allow diminishing golden jellyfish population recover ongeiml tketau jellyfish lake  one palaus famous attractions  reopened,,362,,125,,1547554560,,2019-01-15 07:16:00
@cnn,,CNN,,Jayme Closs told authorities she heard her father get shot and saw her mother die, in an account released by prosecutors. The 13-year-old was held for 88 days, sometimes trapped under her kidnapper's bed. https://cnn.it/2DaShtJ pic.twitter.com/Mj62O1FSq5,,jayme closs told authorities heard father get shot saw mother die account released prosecutors 13yearold held 88 days sometimes trapped kidnappers bed,,189,,79,,1547553664,,2019-01-15 07:01:04
@cnn,,CNN,,Volkswagen unveiled the 2020 Passat at the Detroit Auto Show. Scott Keogh, CEO of Volkswagen Group of America, says VW sees "opportunity" in the sedan space. https://cnn.it/2M8hDeP pic.twitter.com/kXumWQ7KYS,,volkswagen unveiled 2020 passat detroit auto show scott keogh ceo volkswagen group america says vw sees opportunity sedan space,,155,,63,,1547552760,,2019-01-15 06:46:00
@cnn,,CNN,,This past weekend, Canadian air traffic controllers ordered hundreds of pizzas for their American counterparts working without pay due to the ongoing US government shutdown https://cnn.it/2FAZdlp pic.twitter.com/R00hEZUwPZ,,past weekend canadian air traffic controllers ordered hundreds pizzas american counterparts working without pay due ongoing us government shutdown,,750,,173,,1547551863,,2019-01-15 06:31:03
@cnn,,CNN,,Gillette's newest advertisement addresses serious issues like toxic masculinity, sexual harassment and #metoohttps://cnn.it/2Db6qHe ,,gillettes newest advertisement addresses serious issues like toxic masculinity sexual harassment,,1097,,321,,1547551209,,2019-01-15 06:20:09
@cnn,,CNN,,President Trump removed a tweet where he confused a speaking engagement in Louisiana with one in Tennessee, but he is not the first high-profile person to get their geography mixed up. CNN's Jeanne Moos reports. https://cnn.it/2QOhP3v pic.twitter.com/R0UAGqezPb,,president trump removed tweet confused speaking engagement louisiana one tennessee first highprofile person get geography mixed up cnns jeanne moos reports,,201,,76,,1547550960,,2019-01-15 06:16:00
@cnn,,CNN,,Antarctica ice melt has accelerated by 280% in the last four decades, researchers say. A pair of new studies share a same ominous message -- that our planet's ice is melting at an alarming rate, which is bad news for global sea levels https://cnn.it/2DaXvWE ,,antarctica ice melt accelerated 280 last four decades researchers say pair new studies share ominous message  planets ice melting alarming rate bad news global sea levels,,469,,334,,1547550063,,2019-01-15 06:01:03
@cnn,,CNN,,The long-awaited 2020 Toyota Supra is here. It features 335 horsepower and can go from zero to 60 miles per hour in 4.1 seconds. https://cnn.it/2VM2J26 pic.twitter.com/EE581yCa1I,,longawaited 2020 toyota supra here features 335 horsepower go zero 60 miles per hour 41 seconds,,1230,,420,,1547549160,,2019-01-15 05:46:00
@cnn,,CNN,,Three children who were playing outside climbed into an unplugged chest freezer and died after the lid closed and they were unable to get out, a sheriff in northern Florida saidhttps://cnn.it/2DbUaqh ,,three children playing outside climbed unplugged chest freezer died lid closed unable get out sheriff northern florida,,211,,168,,1547548261,,2019-01-15 05:31:01
@cnn,,CNN,,President Trump said he was personally paying for the meals provided to Clemson for their White House visit, due to the government shutdown. Trump told reporters that he was serving "McDonalds, Wendy's and Burger King with some pizza." http://cnn.it/2TPLQlo pic.twitter.com/iGXzrD32F0,,president trump said personally paying meals provided clemson white house visit due government shutdown trump told reporters serving mcdonalds wendys burger king pizza,,999,,296,,1547547360,,2019-01-15 05:16:00
@cnn,,CNN,,5 numbers that prove the Mueller probe isn't a 'big fat hoax' | Analysis by @CillizzaCNN https://cnn.it/2FwnSHQ pic.twitter.com/S2kPESyJma,,5 numbers prove mueller probe big fat hoax  analysis cillizzacnn,,230,,99,,1547546464,,2019-01-15 05:01:04
@cnn,,CNNTonight,,Democrats mull subpoenas for interpreters amid reports of Trump secrecy about Putin  "We can subpoena that interpreter, but the White House is going to claim executive privilege," says Rep. Jim Himes https://cnn.it/2QStO08 pic.twitter.com/WkAFp77HvD,,democrats mull subpoenas interpreters amid reports trump secrecy putin  we subpoena interpreter white house going claim executive privilege says rep jim himes,,321,,112,,1547546281,,2019-01-15 04:58:01
@cnn,,CNN,,More than a dozen senators met Monday evening in a bipartisan effort to talk their way out of the government shutdown. "It was rough going," one source said.https://cnn.it/2Fy6tP3 ,,dozen senators met monday evening bipartisan effort talk way government shutdown it rough going one source,,242,,80,,1547545564,,2019-01-15 04:46:04
@cnn,,CNN,,The Killers cover political topics from the border wall to mass incarceration in their new song "Land of the Free" https://cnn.it/2FAlgss pic.twitter.com/4KJeCUpwGa,,killers cover political topics border wall mass incarceration new song land free,,353,,93,,1547544968,,2019-01-15 04:36:08
@cnn,,CNN,,More than 40,000 immigration hearings have been canceled because of the partial government shutdown, according to a new reporthttps://cnn.it/2Db7eft ,,40000 immigration hearings canceled partial government shutdown according new,,222,,163,,1547544663,,2019-01-15 04:31:03
@cnn,,CNN,,Democratic lawmakers are discussing how to make the interpreters in Trump's meetings with Putin appear before them to learn what transpired amid reports the US President has worked to keep the content of his huddles with Putin a secret https://cnn.it/2FwkBbw pic.twitter.com/gT01Ejyqq8,,democratic lawmakers discussing make interpreters trumps meetings putin appear learn transpired amid reports us president worked keep content huddles putin secret,,351,,107,,1547544363,,2019-01-15 04:26:03
@cnn,,CNNTonight,,"There's an opportunity to now put somebody in Congress that is positive... a principled conservative." Iowa State Sen. Feenstra, who will challenge Rep. Steve King in 2020, reacts to the congressman being stripped of committee assignments following recent racist comments he madepic.twitter.com/0YHRPd0x7y,,theres opportunity put somebody congress positive principled conservative iowa state sen feenstra challenge rep steve king 2020 reacts congressman stripped committee assignments following recent racist comments madepictwittercom0yhrpd0x7y,,199,,58,,1547543972,,2019-01-15 04:19:32
@cnn,,CNN,,Sen. Bernie Sanders will meet on Wednesday with former staff members who alleged they faced harassment and sexism on his 2016 campaign https://cnn.it/2Da6szf pic.twitter.com/5tO74b4mcr,,sen bernie sanders meet wednesday former staff members alleged faced harassment sexism 2016 campaign,,161,,40,,1547543802,,2019-01-15 04:16:42
@cnn,,CNN,,Carol Folt announced her resignation as the chancellor of the University of North Carolina at Chapel Hill amid the debate about the fate of the "Silent Sam" Confederate monument on campushttps://cnn.it/2Da5Ppn ,,carol folt announced resignation chancellor university north carolina chapel hill amid debate fate silent sam confederate monument,,204,,87,,1547543764,,2019-01-15 04:16:04
@cnn,,CNNTonight,,"Why does the President take actions that seem to be in Russia's best interests rather than our own? Obviously we don't know, but what we do know, the facts, we've all seen and heard raise extremely serious questions." - @DonLemon revisits President Trump's past Russia remarkspic.twitter.com/IKbGLvMFsb,,why president take actions seem russias best interests rather own obviously know know facts weve seen heard raise extremely serious questions  donlemon revisits president trumps past russia remarkspictwittercomikbglvmfsb,,2821,,809,,1547542524,,2019-01-15 03:55:24
@cnn,,CNN,,Stormy Daniels is suing several members of the Columbus, Ohio, police department's vice unit for civil rights violations over her arrest last year at a strip club in the cityhttps://cnn.it/2FCFlyF ,,stormy daniels suing several members columbus ohio police departments vice unit civil rights violations arrest last year strip club,,323,,61,,1547543465,,2019-01-15 04:11:05
@cnn,,CNN,,House Judiciary Chairman Jerry Nadler has requested numerous documents and communications related to the administration's "zero-tolerance" policy that led to the separation last year of migrant families who crossed the southern border illegallyhttps://cnn.it/2FyzpGL ,,house judiciary chairman jerry nadler requested numerous documents communications related administrations zerotolerance policy led separation last year migrant families crossed southern border,,348,,117,,1547543278,,2019-01-15 04:07:58
@cnn,,CNN,,Attorney General nominee William Barr shared a controversial memo last year with nearly all of President Trump's lawyers concluding that an aspect of special counsel Robert Mueller's case could be "fatally misconceived," Barr acknowledgedhttps://cnn.it/2Fzz9r0 ,,attorney general nominee william barr shared controversial memo last year nearly president trumps lawyers concluding aspect special counsel robert muellers case could fatally misconceived barr,,119,,75,,1547543071,,2019-01-15 04:04:31
@cnn,,CNN,,Neomi Rao, President Trump's choice to take the DC Circuit seat vacated by Justice Brett Kavanaugh, has a history of controversial writings, including authoring articles attributing some blame to women for being raped under the influence of alcoholhttps://cnn.it/2Fy2IsV ,,neomi rao president trumps choice take dc circuit seat vacated justice brett kavanaugh history controversial writings including authoring articles attributing blame women raped influence,,173,,125,,1547542865,,2019-01-15 04:01:05
@cnn,,CNN,,A photo of an ordinary, brown egg has broken Kylie Jenner's record for most-liked photo https://cnn.it/2suXO8c pic.twitter.com/qyPOsfNcCs,,photo ordinary brown egg broken kylie jenners record mostliked photo,,596,,155,,1547542351,,2019-01-15 03:52:31
@cnn,,CuomoPrimeTime,,Robert Mueller in 2013: "We must never sacrifice our integrity." https://cnn.it/2MaPeVh pic.twitter.com/0lNXExaabX,,robert mueller 2013 we must never sacrifice integrity,,866,,224,,1547541121,,2019-01-15 03:32:01
@cnn,,CNN,,After being closed for two years to allow its diminishing golden jellyfish population to recover, Ongeim'l Tketau Jellyfish Lake -- one of Palau's most famous attractions -- has reopened https://cnn.it/2FAQwb8 pic.twitter.com/RKV1o9SxPz,,closed two years allow diminishing golden jellyfish population recover ongeiml tketau jellyfish lake  one palaus famous attractions  reopened,,440,,111,,1547541960,,2019-01-15 03:46:00
@cnn,,CNN,,A black lawmaker who resigned in Vermont "was a victim of racial harassment," the state's attorney general said, but the case won't be prosecuted because of the First Amendment https://cnn.it/2D9AxiD pic.twitter.com/8rzlckhkEm,,black lawmaker resigned vermont was victim racial harassment states attorney general said case prosecuted first amendment,,111,,67,,1547541942,,2019-01-15 03:45:42
@cnn,,CNN,,The Ed Sullivan Theater in New York City, home of Stephen Colbert's "Late Show," is proving to be a key stop for Democrats who are positioning themselves for 2020 presidential bids, writes CNN's @brianstelterhttps://cnn.it/2Fxww96 ,,ed sullivan theater new york city home stephen colberts late show proving key stop democrats positioning 2020 presidential bids writes cnns,,576,,126,,1547541362,,2019-01-15 03:36:02
@cnn,,CNN,,The Pentagon has approved additional military support for the Department of Homeland Security on the Southwest border, the Defense Department confirmed https://cnn.it/2FDmsM3 pic.twitter.com/JdBr3eSdwo,,pentagon approved additional military support department homeland security southwest border defense department confirmed,,171,,82,,1547541063,,2019-01-15 03:31:03
@cnn,,CNN,,A letter was delivered from US President Donald Trump to North Korean leader Kim Jong Un over the weekend, a source familiar with the ongoing denuclearization talks between Washington and Pyongyang told CNNhttps://cnn.it/2FDlH5F ,,letter delivered us president donald trump north korean leader kim jong un weekend source familiar ongoing denuclearization talks washington pyongyang told,,219,,122,,1547540448,,2019-01-15 03:20:48
@cnn,,CNN,,These gadgets are changing the way moms pump breast milk https://cnn.it/2CeWNFP pic.twitter.com/Y5iG8XqT80,,gadgets changing way moms pump breast milk,,150,,50,,1547540160,,2019-01-15 03:16:00
@cnn,,CuomoPrimeTime,,"We must cultivate patience...maintain a sense of humility...never...sacrifice our integrity. If we do... these...our time will indeed have been time well spent."  Those were the words of Robert Mueller six years ago. He was right then. We are living the proof of that right now.pic.twitter.com/K0695xWCZf,,we must cultivate patiencemaintain sense humilityneversacrifice integrity do theseour time indeed time well spent  words robert mueller six years ago right then living proof right nowpictwittercomk0695xwczf,,1962,,555,,1547539940,,2019-01-15 03:12:20
@cnn,,CNN,,If you're heading to the Maldives for a holiday, there's a strong chance your journey will include a flight on a sea plane. This is what it's like to fly along with the "barefoot pilots" who carry passengers around the popular Indian Ocean destination. https://cnn.it/2Foey8Y pic.twitter.com/l9xy8YHkGd,,heading maldives holiday theres strong chance journey include flight sea plane like fly along barefoot pilots carry passengers around popular indian ocean destination,,271,,90,,1547539630,,2019-01-15 03:07:10
@cnn,,CNN,,Cathay Pacific accidentally discounts business-class tickets — again https://cnn.it/2TPmELI pic.twitter.com/xm9fXPpnpC,,cathay pacific accidentally discounts businessclass tickets —,,94,,39,,1547539537,,2019-01-15 03:05:37
@cnn,,CNN,,A river of chocolate blocked part of Interstate 40 near Flagstaff, Arizona, after a tanker hauling 40,000 pounds of liquid chocolate overturned. No one was hurt, but the state Department of Public Safety called it a "sweet cleanup." https://cnn.it/2Fw9WOe pic.twitter.com/oAeELRLyhs,,river chocolate blocked part interstate 40 near flagstaff arizona tanker hauling 40000 pounds liquid chocolate overturned one hurt state department public safety called sweet cleanup,,377,,124,,1547539267,,2019-01-15 03:01:07
@cnn,,CNN,,Jayme Closs told authorities she heard her father get shot and saw her mother die before the 13-year-old was held for 88 days, sometimes trapped under her kidnapper's bed https://cnn.it/2Fymsg0 ,,jayme closs told authorities heard father get shot saw mother die 13yearold held 88 days sometimes trapped kidnappers bed,,146,,59,,1547539241,,2019-01-15 03:00:41
@cnn,,CuomoPrimeTime,,.@ChrisCuomo: In no way do I want to imply I think I have a reason to say the President is an asset of Russia. I'd love to agree with him that it is absurd.  However when you lie, conceal, have no integrity on the topic and can't be trusted, this is the suspicion that arises.pic.twitter.com/aP4cddZ7lL,,chriscuomo way want imply think reason say president asset russia id love agree absurd  however lie conceal integrity topic cant trusted suspicion arisespictwittercomap4cddz7ll,,2127,,440,,1547537730,,2019-01-15 02:35:30
@cnn,,CNN,,GOP @RepChrisStewart calls on embattled Rep. Steve King to resign from Congress over his racist remarks  “Mr. King, I think, has become ineffective. ... It's not the first time that he has said things that the party just cringes at. ... I wish he'd resign" https://cnn.it/2Da64kp pic.twitter.com/jGcf0uguCG,,gop repchrisstewart calls embattled rep steve king resign congress racist remarks  “mr king think become ineffective  first time said things party cringes at  wish hed resign,,577,,159,,1547537750,,2019-01-15 02:35:50
@cnn,,CNN,,Luxembourg has announced plans to make all public transportation free from March 2020. With a population of about 600,000 people, the landlocked country is one of the richest -- and smallest -- nations in Europe, and it suffers from major traffic jams. https://cnn.it/2FxrbyA pic.twitter.com/bGfaAymaAL,,luxembourg announced plans make public transportation free march 2020 population 600000 people landlocked country one richest  smallest  nations europe suffers major traffic jams,,507,,179,,1547536865,,2019-01-15 02:21:05
@cnn,,AC360,,.@JeffreyToobin: "Why do his lawyers not let Donald Trump talk to investigators?  Because... Trump lies all the time... Trump has lied thousands of times since he's become President and his lawyers being the good lawyers they are don't want him to do it when it would be a crime."pic.twitter.com/fCP8nZvedu,,jeffreytoobin why lawyers let donald trump talk investigators  because trump lies time trump lied thousands times since hes become president lawyers good lawyers want would crimepictwittercomfcp8nzvedu,,2157,,587,,1547534999,,2019-01-15 01:49:59
@cnn,,CNN,,Joaquin "El Chapo" Guzman's life hiding from authorities in the mountains of northwest Mexico was filled with military grade weapons and constant worry over being captured, according to testimony from his "right-hand man" https://cnn.it/2FwCPd7 pic.twitter.com/WMfK8kvoc3,,joaquin el chapo guzmans life hiding authorities mountains northwest mexico filled military grade weapons constant worry captured according testimony righthand man,,110,,53,,1547536205,,2019-01-15 02:10:05
@cnn,,CNN,,Gretchen Carlson turns the spotlight on harassment victims outside of Hollywood https://cnn.it/2FzAxKo pic.twitter.com/FcKl0SzGIH,,gretchen carlson turns spotlight harassment victims outside hollywood,,103,,31,,1547535666,,2019-01-15 02:01:06
@cnn,,AC360,,.@andersoncooper: Today an American President went on national television to do what no American President has had to contemplate doing:  Deny he provided comfort to a dangerous adversary that just carried out an attack on the country he himself governs. #KeepingThemHonestpic.twitter.com/DqiYh2tsW3,,andersoncooper today american president went national television american president contemplate doing  deny provided comfort dangerous adversary carried attack country governs keepingthemhonestpictwittercomdqiyh2tsw3,,5273,,1717,,1547532603,,2019-01-15 01:10:03
@cnn,,CNN,,Toyota announced the return of its two-seat sports car, the Supra, at the Detroit Auto Show. The 2020 model will arrive in dealerships this summer with a starting price around $50,000. https://cnn.it/2VTKgRl pic.twitter.com/DgerEgcaRW,,toyota announced return twoseat sports car supra detroit auto show 2020 model arrive dealerships summer starting price around 50000,,489,,181,,1547535411,,2019-01-15 01:56:51
@cnn,,AC360,,"Amazing... explosive. But... not really surprising."  That's how former Director of National Intelligence James Clapper described the moment when President Trump denied he was not a Russian asset on the lawn of the White House today. http://cnn.it/2VUOHv1 pic.twitter.com/5im06FyPqx,,amazing explosive but really surprising  thats former director national intelligence james clapper described moment president trump denied russian asset lawn white house today,,1073,,387,,1547533056,,2019-01-15 01:17:36
@cnn,,CNN,,President Trump removed a tweet where he confused a speaking engagement in Louisiana with one in Tennessee, but he is not the first high-profile person to get their geography mixed up. CNN's Jeanne Moos reports. https://cnn.it/2QOhP3v pic.twitter.com/USe1zoovXw,,president trump removed tweet confused speaking engagement louisiana one tennessee first highprofile person get geography mixed up cnns jeanne moos reports,,266,,102,,1547535036,,2019-01-15 01:50:36
@cnn,,CNN,,GOP Rep. Steve King has been stripped of committee assignments following recent racist comments he made, House Minority Leader Kevin McCarthy said https://cnn.it/2Fy1GNA pic.twitter.com/WPsfdKQsMf,,gop rep steve king stripped committee assignments following recent racist comments made house minority leader kevin mccarthy said,,640,,113,,1547534747,,2019-01-15 01:45:47
@cnn,,CNN,,Volkswagen unveiled the 2020 Passat at the Detroit Auto Show. Scott Keogh, CEO of Volkswagen Group of America, says VW sees "opportunity" in the sedan space. https://cnn.it/2M8hDeP pic.twitter.com/BQdFYQleGx,,volkswagen unveiled 2020 passat detroit auto show scott keogh ceo volkswagen group america says vw sees opportunity sedan space,,116,,42,,1547534510,,2019-01-15 01:41:50
@cnn,,OutFrontCNN,,During the Clemson Tigers' visit to the White House after their College Football National Championship win, President Donald Trump joked about personally buying hamburgers for the players instead of having his wife, Melania Trump, make them salads. https://cnn.it/2VSA3ob pic.twitter.com/6ToibgeabA,,clemson tigers visit white house college football national championship win president donald trump joked personally buying hamburgers players instead wife melania trump make salads,,590,,184,,1547533567,,2019-01-15 01:26:07
@cnn,,CNN,,House Minority Leader Kevin McCarthy announced that the House Republican Steering Committee -- which oversees committee assignments -- met Monday night and made a decision that GOP Rep. Steve King "will not be serving on committees in this Congress"https://cnn.it/2FwY4eQ ,,house minority leader kevin mccarthy announced house republican steering committee  oversees committee assignments  met monday night made decision gop rep steve king will serving committees,,697,,145,,1547533767,,2019-01-15 01:29:27
@cnn,,CNN,,House to vote on a resolution disapproving of Republican Rep. Steve King's comments on white nationalism https://cnn.it/2DaHQ9q pic.twitter.com/aMSqo0K0ak,,house vote resolution disapproving republican rep steve kings comments white nationalism,,176,,52,,1547532402,,2019-01-15 01:06:42
@cnn,,OutFrontCNN,,President Trump insists he's been tougher on Russia than any of his predecessors.  "Tough on Russia? Well, the President's behavior doesn't really back up his words." -CNN's @ErinBurnett examines his past remarks regarding Russian President Vladimir Putin. https://cnn.it/2VUOHv1 pic.twitter.com/XChakYY8IM,,president trump insists hes tougher russia predecessors  tough russia well presidents behavior really back words cnns erinburnett examines past remarks regarding russian president vladimir putin,,366,,136,,1547531668,,2019-01-15 00:54:28
@cnn,,CNN,,President Trump said he is personally paying for the meals provided to Clemson for their White House visit, due to the government shutdown. Trump told reporters that he is serving "McDonalds, Wendy's and Burger King with some pizza." https://cnn.it/2TPLQlo pic.twitter.com/ub4ZdPPGSA,,president trump said personally paying meals provided clemson white house visit due government shutdown trump told reporters serving mcdonalds wendys burger king pizza,,3065,,1016,,1547531993,,2019-01-15 00:59:53
@cnn,,CNN,,A tanker hauling 40,000 pounds of liquid chocolate rolled over on Interstate 40 near Flagstaff, Arizona, leaving a cocoa-colored river all over the road https://cnn.it/2Dbv76B pic.twitter.com/HqU0fqadBq,,tanker hauling 40000 pounds liquid chocolate rolled interstate 40 near flagstaff arizona leaving cocoacolored river road,,471,,186,,1547531714,,2019-01-15 00:55:14
@cnn,,OutFrontCNN,,"Why wouldn't he share that with his inner circle, his most trusted advisers? Unless there was something there he didn't want revealed." - Rep. Heck says "it defies explanation" that Trump didn't share with his advisers records of meetings with Russian President Vladimir Putin.pic.twitter.com/PL7lh5rKKi,,why share inner circle trusted advisers unless something want revealed  rep heck says it defies explanation trump share advisers records meetings russian president vladimir putinpictwittercompl7lh5rkki,,731,,254,,1547530805,,2019-01-15 00:40:05
@cnn,,CNN,,The Chinese investment boom into America has almost completely vanished. Foreign direct investment from China into the United States plummeted by 83% in 2018, according to a new report. https://cnn.it/2Fzem6W pic.twitter.com/dAynxDdrDf,,chinese investment boom america almost completely vanished foreign direct investment china united states plummeted 83 2018 according new report,,135,,113,,1547531166,,2019-01-15 00:46:06
@cnn,,CNN,,Trump is personally paying for the meals being provided to the Clemson football team during their national championship celebration at the White House. Earlier, Trump told reporters he is serving "McDonald's, Wendy's and Burger King's with some pizza."https://cnn.it/2FwS1XG ,,trump personally paying meals provided clemson football team national championship celebration white house earlier trump told reporters serving mcdonalds wendys burger kings,,1017,,266,,1547530825,,2019-01-15 00:40:25
@cnn,,CNNSitRoom,,CNN’s @clarissaward is in Northern Syria, where Syrian Kurds contemplate war without their US allies in the fight against ISIS. http://cnn.it/2RLxRjb pic.twitter.com/MA4vGg8toR,,cnn’s clarissaward northern syria syrian kurds contemplate war without us allies fight isis,,126,,69,,1547528720,,2019-01-15 00:05:20
@cnn,,CNN,,A man who took hostages at a UPS facility in New Jersey was killed by police, officials say. Neither hostage was hurt. https://cnn.it/2D7cocc pic.twitter.com/PuIYGGbovO,,man took hostages ups facility new jersey killed police officials say neither hostage hurt,,155,,96,,1547530515,,2019-01-15 00:35:15
@cnn,,CNN,,Trump's team rebuffed special counsel Mueller's request in recent weeks for an in-person session with Trump to ask follow-up questions, sources say. The request was made after Trump's team submitted written answers to a limited number of questions. https://cnn.it/2FvJVi5 pic.twitter.com/BO6gtMo82s,,trumps team rebuffed special counsel muellers request recent weeks inperson session trump ask followup questions sources say request made trumps team submitted written answers limited number questions,,188,,136,,1547530280,,2019-01-15 00:31:20
@cnn,,OutFrontCNN,,"I am beginning to feel as though I am on the set of The Manchurian Candidate," says Democratic Rep. Denny Heck about President Trump's denial that he ever worked for Russia. "This is beyond bizarre now." https://cnn.it/2VUGrv2 pic.twitter.com/EiyT3RQHGL,,i beginning feel though set manchurian candidate says democratic rep denny heck president trumps denial ever worked russia this beyond bizarre now,,493,,156,,1547529635,,2019-01-15 00:20:35
@cnn,,CNN,,Bitcoin just celebrated its tenth anniversary. Now, as the world's most famous cryptocurrency matures, its future is far from certain. https://cnn.it/2DbsL7L pic.twitter.com/qC6CdOpHCf,,bitcoin celebrated tenth anniversary now worlds famous cryptocurrency matures future far certain,,104,,60,,1547529662,,2019-01-15 00:21:02
@cnn,,CNN,,"Women in Saudi Arabia will be informed by text if their husbands are divorcing them...However, the text is nothing but a symbolic technological advancement to mask a flourishing system that reinforces men's ownership of women," @HolstaT writes @CNNOpinionhttps://cnn.it/2DbGbRn ,,women saudi arabia informed text husbands divorcing themhowever text nothing symbolic technological advancement mask flourishing system reinforces mens ownership women holstat writes,,240,,156,,1547529067,,2019-01-15 00:11:07
@cnn,,CNN,,A 60-year-old man struggled with unexplained sweating episodes for three years before doctors diagnosed him with temporal lobe seizures, according to a case studyhttps://cnn.it/2D9fwof ,,60yearold man struggled unexplained sweating episodes three years doctors diagnosed temporal lobe seizures according case,,142,,65,,1547528463,,2019-01-15 00:01:03
@cnn,,CNN,,The 1 giant question Donald Trump still hasn't answered on Russia | Analysis by @CillizzaCNN https://cnn.it/2FwMnos pic.twitter.com/fQg9MvKuZb,,1 giant question donald trump still answered russia  analysis cillizzacnn,,135,,59,,1547527862,,2019-01-14 23:51:02
@cnn,,CNN,,Wells Fargo has splurged on stock buybacks since its fake-accounts scandal https://cnn.it/2FyIxuT pic.twitter.com/qfbHrbnJRu,,wells fargo splurged stock buybacks since fakeaccounts scandal,,79,,57,,1547527265,,2019-01-14 23:41:05
@cnn,,CNNSitRoom,,Analysts say President Donald Trump's pattern of deference to Russian President Vladimir Putin is both unusual and hard to explain. @BrianToddCNN looks at Trump's track record with the Russian president and the broader implications. https://cnn.it/2RLTCiH pic.twitter.com/smw8VUHfkm,,analysts say president donald trumps pattern deference russian president vladimir putin unusual hard explain briantoddcnn looks trumps track record russian president broader implications,,170,,82,,1547525091,,2019-01-14 23:04:51
@cnn,,CNN,,For two weeks in a row, the Supreme Court has met behind closed doors in its ornate conference room to pore over an unusual number of controversial issues in order to decide whether to take up the cases this termhttps://cnn.it/2Dc1l1x ,,two weeks row supreme court met behind closed doors ornate conference room pore unusual number controversial issues order decide whether take cases,,174,,82,,1547527075,,2019-01-14 23:37:55
@cnn,,CNNSitRoom,,.@SenBlumenthal: “These revelations are absolutely stomach-turning. I’m almost at a loss for words when you think of how extraordinary it is that the FBI was investigating the President of the United States for a possible threat to our national security.” https://cnn.it/2RLTCiH pic.twitter.com/xaCOJAMgSX,,senblumenthal “these revelations absolutely stomachturning i’m almost loss words think extraordinary fbi investigating president united states possible threat national security”,,623,,214,,1547526535,,2019-01-14 23:28:55
@cnn,,CNN,,The big shutdown threat we aren't talking about | By Theresa Payton via @CNNOpinion https://cnn.it/2FCcAlH pic.twitter.com/4JxJ1cOGsJ,,big shutdown threat talking  theresa payton via cnnopinion,,98,,52,,1547526666,,2019-01-14 23:31:06
@cnn,,CNN,,Trump denied ever working for Russia, calling the question a “disgrace,” after new transcripts revealed the FBI looked into whether he was following the directions of Moscow.  Former Nixon WH counsel John Dean joins Full Circle. Tune in on Facebook Watch: https://cnn.it/2DaHQXd pic.twitter.com/Gn5zqcqDyf,,trump denied ever working russia calling question “disgrace” new transcripts revealed fbi looked whether following directions moscow  former nixon wh counsel john dean joins full circle tune facebook watch,,183,,59,,1547526309,,2019-01-14 23:25:09
@cnn,,CNN,,The first government shutdown was more recent than you might think | Analysis by CNN's @brennawilliams https://cnn.it/2D8rgqL pic.twitter.com/jbaSxhYVLS,,first government shutdown recent might think  analysis cnns brennawilliams,,64,,34,,1547526010,,2019-01-14 23:20:10
@cnn,,CNNSitRoom,,British Prime Minister Theresa May pleads for support ahead of a high-stakes vote on the terms of British pullout from the European Union, CNN’s @richardquest reports from London. https://cnn.it/2HaFvzm pic.twitter.com/g2cWbadBPe,,british prime minister theresa may pleads support ahead highstakes vote terms british pullout european union cnn’s richardquest reports london,,72,,34,,1547524481,,2019-01-14 22:54:41
@cnn,,CNN,,A media company led by a hedge fund is making a play to take over Gannett, one of the largest newspaper companies in the United States https://cnn.it/2FyE4ID pic.twitter.com/ESrYXTc0f4,,media company led hedge fund making play take gannett one largest newspaper companies united states,,59,,35,,1547525768,,2019-01-14 23:16:08
@cnn,,CNNSitRoom,,Democratic Rep. @JoaquinCastrotx: “He has never said a bad word about Vladimir Putin. He’s done things which are essentially what the Russians would want in terms of foreign policy … Russia could not have asked for a friendlier United States president.” https://cnn.it/2RLTCiH pic.twitter.com/nylxVNMk2x,,democratic rep joaquincastrotx “he never said bad word vladimir putin he’s done things essentially russians would want terms foreign policy … russia could asked friendlier united states president”,,264,,97,,1547522466,,2019-01-14 22:21:06
@cnn,,CNN,,The Trump administration's efforts to weaken Obamacare's contraceptive coverage mandate have now been blocked throughout the US https://cnn.it/2Fzdy24 pic.twitter.com/ptujqrIPvM,,trump administrations efforts weaken obamacares contraceptive coverage mandate blocked throughout us,,557,,144,,1547525406,,2019-01-14 23:10:06
@cnn,,CNN,,The 35 most astounding lines from Donald Trump's Jeanine Pirro interview | Analysis by @CillizzaCNN https://cnn.it/2Dao1zq pic.twitter.com/pbTSsNRCkv,,35 astounding lines donald trumps jeanine pirro interview  analysis cillizzacnn,,96,,56,,1547524866,,2019-01-14 23:01:06
@cnn,,CNNSitRoom,,“The American people deserve to know what was said by their president and somebody who is the head of an adversarial nation who interfered with our 2016 presidential election,” Democratic Rep. @JoaquinCastrotx says. http://cnn.it/2RLTCiH pic.twitter.com/Els9b6vGxx,,“the american people deserve know said president somebody head adversarial nation interfered 2016 presidential election” democratic rep joaquincastrotx says,,306,,84,,1547522594,,2019-01-14 22:23:14
@cnn,,CNN,,Antarctica ice melt has accelerated by 280% in the last 4 decades, researchers say. A pair of new studies share a same ominous message -- that our planet's ice is melting at an alarming rate, which is bad news for global sea levelshttps://cnn.it/2D8E7JM ,,antarctica ice melt accelerated 280 last 4 decades researchers say pair new studies share ominous message  planets ice melting alarming rate bad news global sea,,968,,828,,1547524668,,2019-01-14 22:57:48
@cnn,,CNNSitRoom,,“A lot of smoke that centers around that meeting that we just keep coming back to as a central part of it, which is the June 2016 meeting at Trump Tower,” @CillizzaCNN says  “Is it possible all this smoke doesn’t mean that there’s a fire? Sure it’s possible but it seems unlikely"pic.twitter.com/lzB46fOf0p,,“a lot smoke centers around meeting keep coming back central part it june 2016 meeting trump tower” cillizzacnn says  “is possible smoke doesn’t mean there’s fire sure it’s possible seems unlikelypictwittercomlzb46fof0p,,258,,130,,1547523997,,2019-01-14 22:46:37
@cnn,,CNN,,Doing less sitting and more moving is tied to living longer, according to a new study https://cnn.it/2FzbEyr pic.twitter.com/K4CpIZaeUG,,less sitting moving tied living longer according new study,,146,,55,,1547524204,,2019-01-14 22:50:04
@cnn,,CNN,,Senate Majority Leader Mitch McConnell says Rep. Steve King's comments are "unwelcome and unworthy of his elected position" https://cnn.it/2Dboa5D pic.twitter.com/2wl4X88PvN,,senate majority leader mitch mcconnell says rep steve kings comments unwelcome unworthy elected position,,411,,122,,1547523612,,2019-01-14 22:40:12
@cnn,,CNNBusiness,,Today’s afternoon business headlines:  - Theresa May makes final call for support for Brexit deal - Falling Chinese exports add to fears of downturn - Citi beats expectations - Saudi Arabia: We can easily cut oil supply further if global economy stalls  https://cnn.it/2VFSb4F pic.twitter.com/f5RWZ9igcF,,today’s afternoon business headlines   theresa may makes final call support brexit deal  falling chinese exports add fears downturn  citi beats expectations  saudi arabia easily cut oil supply global economy stalls,,73,,35,,1547523381,,2019-01-14 22:36:21
@cnn,,CNN,,Saudi Arabia's energy minister says OPEC and its allies are prepared to quickly respond to a global economic slowdown https://cnn.it/2AOfsZj pic.twitter.com/oxY24lAx2s,,saudi arabias energy minister says opec allies prepared quickly respond global economic slowdown,,102,,57,,1547523060,,2019-01-14 22:31:00
@cnn,,CNN,,Trump denied ever working for Russia, calling the question a “disgrace,” after new transcripts revealed the FBI looked into whether he was following the directions of Moscow.  Former Nixon White House counsel John Dean joins Full Circle. Tune in 6:25p ET. https://cnn.it/2DaChYI pic.twitter.com/tnrYNfDdI2,,trump denied ever working russia calling question “disgrace” new transcripts revealed fbi looked whether following directions moscow  former nixon white house counsel john dean joins full circle tune 625p et,,237,,101,,1547522716,,2019-01-14 22:25:16
@cnn,,CNNBusiness,,Saudi Arabia's energy minister Khalid Al Falih says that OPEC and its allies are prepared to quickly respond to a global economic slowdown https://cnn.it/2Db6ya1 pic.twitter.com/2ClJvxYBqG,,saudi arabias energy minister khalid al falih says opec allies prepared quickly respond global economic slowdown,,74,,50,,1547517016,,2019-01-14 20:50:16
@cnn,,CNN,,Cathay Pacific accidentally discounts business-class tickets — again https://cnn.it/2TPmELI pic.twitter.com/lCbI7Jnv2G,,cathay pacific accidentally discounts businessclass tickets —,,83,,32,,1547521930,,2019-01-14 22:12:10
@cnn,,TheLeadCNN,,CNN’s @Ryanyoungnews is in Barron, Wisconsin, where a judge has set bail at $5 million for the man accused of killing James and Denise Closs and kidnapping their 13-year-old daughter Jayme Closs. https://cnn.it/2RMpBzl pic.twitter.com/cNZcN0pEza,,cnn’s ryanyoungnews barron wisconsin judge set bail 5 million man accused killing james denise closs kidnapping 13yearold daughter jayme closs,,147,,48,,1547520761,,2019-01-14 21:52:41
@cnn,,CNN,,As people post photos of themselves 10 years apart for the #10yearchallenge, here's a look at eight politicians now and what they were doing back in 2009 https://cnn.it/2Das7ao pic.twitter.com/lnfUc4Nq8F,,people post photos 10 years apart 10yearchallenge heres look eight politicians back 2009,,469,,86,,1547520851,,2019-01-14 21:54:11
@cnn,,CNNnewsroom,,Political commentator @ananavarro calls on Republican leadership to strip Rep. Steve King of his committee assignments over his racist remarks. https://cnn.it/2FzQH6y pic.twitter.com/C2SoKqPoJR,,political commentator ananavarro calls republican leadership strip rep steve king committee assignments racist remarks,,427,,128,,1547517940,,2019-01-14 21:05:40
@cnn,,CNN,,NBCUniversal is launching its own streaming service in 2020 https://cnn.it/2Fz2qlN pic.twitter.com/pFG8fYpWaq,,nbcuniversal launching streaming service 2020,,213,,65,,1547520488,,2019-01-14 21:48:08
@cnn,,CNNBusiness,,The Dow lost 86 points on Monday, marking the first back-to-back declines of the year. The S&P 500 declined 0.5%, while the Nasdaq fell nearly 1%. All three major indexes closed well off their worst levels of the day. https://cnn.it/2Da0T3N ,,dow lost 86 points monday marking first backtoback declines year sp 500 declined 05 nasdaq fell nearly 1 three major indexes closed well worst levels day,,95,,58,,1547518057,,2019-01-14 21:07:37
@cnn,,CNN,,An American president actually had to deny he is a foreign agent | By Trump biographer Michael D'Antonio via @CNNOpinion https://cnn.it/2DbgcJD pic.twitter.com/snJQJLyvH7,,american president actually deny foreign agent  trump biographer michael dantonio via cnnopinion,,409,,157,,1547520343,,2019-01-14 21:45:43
@cnn,,TheLeadCNN,,.@jaketapper: “US officials say because of this secrecy there is no detailed record of Trump’s 5 conversations with Putin...at least not one belonging to the United States. The Kremlin has notes of those meetings, no doubt. And Democrats on Capitol Hill, well they have questions”pic.twitter.com/byx47OX1Su,,jaketapper “us officials say secrecy detailed record trump’s 5 conversations putinat least one belonging united states kremlin notes meetings doubt democrats capitol hill well questions”pictwittercombyx47ox1su,,2282,,772,,1547518391,,2019-01-14 21:13:11
@cnn,,CNN,,Another migrant caravan is forming in Honduras, this time against the backdrop of a partial US government shutdown directly linked to President Trump's border wallhttps://cnn.it/2Daxqqs ,,another migrant caravan forming honduras time backdrop partial us government shutdown directly linked president trumps border,,281,,118,,1547519683,,2019-01-14 21:34:43
@cnn,,CNN,,Long lines and staffing issues have hit airports around the country as the partial government shutdown is in its fourth week https://cnn.it/2FyXUUn pic.twitter.com/qHijJjBQbG,,long lines staffing issues hit airports around country partial government shutdown fourth week,,156,,77,,1547518439,,2019-01-14 21:13:59
@cnn,,CNNPolitics,,President Trump said he "really (hasn't) been following" the news about Rep. Steve King's comments. Meanwhile, Trump engaged in racist dog whistles of his own over the weekend https://cnn.it/2Db2erb pic.twitter.com/cOPiIVgYWl,,president trump said really hasnt following news rep steve kings comments meanwhile trump engaged racist dog whistles weekend,,253,,104,,1547514123,,2019-01-14 20:02:03
@cnn,,CNN,,Following Lady Gaga's big co-win for best actress at the Critics' Choice Awards Sunday, she had to rush off to be by the side of her dying horse, Arabella https://cnn.it/2FyTAVa pic.twitter.com/LykJm9YPbf,,following lady gagas big cowin best actress critics choice awards sunday rush side dying horse arabella,,304,,48,,1547517465,,2019-01-14 20:57:45
@cnn,,CNNnewsroom,,Frmr. interpreter to presidents, Dimitry Zarechnak, calls threat to subpoena Trump's interpreter "atrocious."   "If any foreign leader thinks that the interpreter can be subpoenaed to testify, he will not want to have that meeting... that would be a crazy situation.pic.twitter.com/xyXkhhq294,,frmr interpreter presidents dimitry zarechnak calls threat subpoena trumps interpreter atrocious   if foreign leader thinks interpreter subpoenaed testify want meeting would crazy situationpictwittercomxyxkhhq294,,451,,158,,1547516574,,2019-01-14 20:42:54
@cnn,,CNN,,A rare calico lobster turned up at a Maryland fish market. The chances of finding one: 1 in 30 million https://cnn.it/2Dbop0B pic.twitter.com/59sEAyx50J,,rare calico lobster turned maryland fish market chances finding one 1 30 million,,1338,,335,,1547516419,,2019-01-14 20:40:19
@cnn,,CNN,,The suspect in Jayme Closs' kidnapping said he watched her board a school bus and knew "that was the girl he was going to take," a court filing states https://cnn.it/2D9xh6y pic.twitter.com/PesWLKqyCr,,suspect jayme closs kidnapping said watched board school bus knew that girl going take court filing states,,182,,102,,1547515673,,2019-01-14 20:27:53
@cnn,,CNN,,The British Nutrition Foundation released this month new portion-size guidelines designed to help people eat the right amounts of each food group -- and possibly help them avoid overeating https://cnn.it/2D8mOIK pic.twitter.com/YzwF6ZSOo2,,british nutrition foundation released month new portionsize guidelines designed help people eat right amounts food group  possibly help avoid overeating,,174,,61,,1547514664,,2019-01-14 20:11:04
@cnn,,CNN,,Democratic Rep. Alcee Hastings announced that he is being treated for pancreatic cancer and that he plans to remain in Congress during the treatment, saying that "this is a battle worth fighting" https://cnn.it/2FvT6yZ pic.twitter.com/VOWdFfI6LD,,democratic rep alcee hastings announced treated pancreatic cancer plans remain congress treatment saying this battle worth fighting,,235,,47,,1547514479,,2019-01-14 20:07:59
@cnn,,CNN,,An Arizona care facility says it will turn over all records related to the patient in a vegetative state who gave birth last monthhttps://cnn.it/2FCt5hF ,,arizona care facility says turn records related patient vegetative state gave birth last,,188,,61,,1547514252,,2019-01-14 20:04:12
@cnn,,CNN,,Republicans are losing the shutdown blame game -- and they can't do anything about it | Analysis by @CillizzaCNN https://cnn.it/2D9uudP pic.twitter.com/jdNtJNHW1P,,republicans losing shutdown blame game  cant anything  analysis cillizzacnn,,706,,172,,1547513616,,2019-01-14 19:53:36
@cnn,,CNN,,Sleeping fewer than six hours a night or waking frequently raises your risk of developing damaging plaque in arteries throughout your body, not just your heart, according to a new study https://cnn.it/2Fy9AGH pic.twitter.com/6ameab0llw,,sleeping fewer six hours night waking frequently raises risk developing damaging plaque arteries throughout body heart according new study,,344,,157,,1547513495,,2019-01-14 19:51:35
@cnn,,CNN,,"Stop, stop, just stop -- What are you doing? You're f---ing it all up, Mick": President Trump lashed out at acting chief of staff Mick Mulvaney during a Situation Room meeting with Democrats earlier this month, a White House official says https://cnn.it/2D91ylX pic.twitter.com/oGGe0MdmA8,,stop stop stop  doing fing up mick president trump lashed acting chief staff mick mulvaney situation room meeting democrats earlier month white house official says,,288,,139,,1547512204,,2019-01-14 19:30:04
@cnn,,CNN,,White House economic adviser Kevin Hassett says furloughed federal workers who aren't getting paid during the partial government shutdown are "better off" because they didn't have to use vacation days https://cnn.it/2D9NDw3 pic.twitter.com/IE5ye2NtJn,,white house economic adviser kevin hassett says furloughed federal workers getting paid partial government shutdown better off use vacation days,,202,,125,,1547511607,,2019-01-14 19:20:07
@cnn,,CNN,,"If, as the White House says, Trump has no compromised relationship with Russia, why does he go out of his way to hide his interactions with Putin?" | Analysis by @stcollinsonhttps://cnn.it/2FxajrI ,,if white house says trump compromised relationship russia go way hide interactions putin  analysis,,1002,,306,,1547511006,,2019-01-14 19:10:06
@cnn,,CNN,,Taco Bell is attempting to reach a broader customer base by testing out an offering of vegetarian menu items https://cnn.it/2AH4N2F pic.twitter.com/QZeQcD4YvP,,taco bell attempting reach broader customer base testing offering vegetarian menu items,,217,,48,,1547510460,,2019-01-14 19:01:00
@cnn,,CNN,,A two-year-old boy is the focus of a major rescue operation after falling into a 360-foot-deep well in the southern Spanish province of Málaga on Sunday afternoon https://cnn.it/2FzhH5V pic.twitter.com/m71RHhu1U5,,twoyearold boy focus major rescue operation falling 360footdeep well southern spanish province málaga sunday afternoon,,126,,59,,1547509742,,2019-01-14 18:49:02
@cnn,,CNN,,TSA airport lines continue to suffer due to the government shutdown.  “We saw people missing flights. There were people crying not able to get through,” @DianneG reports from Hartsfield-Jackson Atlanta International, the world’s busiest airport: https://cnn.it/2HckfJK pic.twitter.com/rZxiwKqlSF,,tsa airport lines continue suffer due government shutdown  “we saw people missing flights people crying able get through” dianneg reports hartsfieldjackson atlanta international world’s busiest airport,,635,,410,,1547508991,,2019-01-14 18:36:31
@cnn,,CNN,,Human trafficking is a global epidemic. And we can all help fight it. | Jane Mosbacher Morris for CNN Business Perspectives https://cnn.it/2FuWI4i pic.twitter.com/E8lQ3DYf3n,,human trafficking global epidemic help fight it  jane mosbacher morris cnn business perspectives,,183,,63,,1547508009,,2019-01-14 18:20:09
@cnn,,CNN,,A series of Pacific storms will bring heavy rain, extreme winds and deep snow to California this week https://cnn.it/2D9EIuz pic.twitter.com/NiOVhpXTRY,,series pacific storms bring heavy rain extreme winds deep snow california week,,173,,91,,1547507407,,2019-01-14 18:10:07
@cnn,,CNN,,Three police officers have been gunned down across the US in the last five days -- two in Southern cities and a third in California https://cnn.it/2Fxsldt pic.twitter.com/1RpE3ep8tM,,three police officers gunned across us last five days  two southern cities third california,,251,,148,,1547506958,,2019-01-14 18:02:38
@cnn,,CNN,,Government shutdown negotiations appear frozen in place https://cnn.it/2FxorkP pic.twitter.com/pA6hho3W1R,,government shutdown negotiations appear frozen place,,213,,91,,1547506242,,2019-01-14 17:50:42
@cnn,,CNN,,Hyundai is the big awards winner at this year's Detroit auto show, capturing both the Car of the Year and SUV of the Year honors https://cnn.it/2FwynuR pic.twitter.com/XHDfi5Wb3C,,hyundai big awards winner years detroit auto show capturing car year suv year honors,,165,,55,,1547505611,,2019-01-14 17:40:11
@cnn,,CNN,,Netflix dominates the streaming world right now. But with a lot more competition on the horizon, that dominance might soon come into question. https://cnn.it/2HcoN2T pic.twitter.com/POXhVzVGdN,,netflix dominates streaming world right now lot competition horizon dominance might soon come question,,127,,44,,1547505000,,2019-01-14 17:30:00
@cnn,,CNN,,President Trump is "not going to budge even 1 inch" on his demand for a border wall as the partial government shutdown enters its fourth week, a source familiar with the President's mindset told CNN https://cnn.it/2FykzjF pic.twitter.com/z3wSa7MY3e,,president trump not going budge even 1 inch demand border wall partial government shutdown enters fourth week source familiar presidents mindset told cnn,,297,,119,,1547504407,,2019-01-14 17:20:07
@cnn,,CNN,,Some TSA lanes at Hartsfield-Jackson Atlanta International Airport were closed Monday morning in part due to short staffing, an airport official sayshttps://cnn.it/2D8QVj7 ,,tsa lanes hartsfieldjackson atlanta international airport closed monday morning part due short staffing airport official,,160,,91,,1547503803,,2019-01-14 17:10:03
@cnn,,CNN,,This weekend, Canadian air traffic controllers ordered hundreds of pizzas for their American counterparts working without pay due to the ongoing US government shutdown https://cnn.it/2FwaJP6 pic.twitter.com/BlKPoe7MeQ,,weekend canadian air traffic controllers ordered hundreds pizzas american counterparts working without pay due ongoing us government shutdown,,976,,191,,1547503211,,2019-01-14 17:00:11
@cnn,,CNN,,Volkswagen is investing $800 million in its plant in Chattanooga, Tennessee, a move that will add 1,000 jobs to the factory, the company says. It plans to build electric cars there. https://cnn.it/2FxPoF5 pic.twitter.com/Kj4GzZxWIJ,,volkswagen investing 800 million plant chattanooga tennessee move add 1000 jobs factory company says plans build electric cars there,,344,,93,,1547502606,,2019-01-14 16:50:06
@cnn,,CNN,,A pregnant lawmaker has delayed the birth of her second child, against doctors' advice, in order to vote against UK Prime Minister Theresa May's beleaguered EU withdrawal deal on Tuesdayhttps://cnn.it/2FyayCW ,,pregnant lawmaker delayed birth second child doctors advice order vote uk prime minister theresa mays beleaguered eu withdrawal deal,,396,,114,,1547502002,,2019-01-14 16:40:02
@cnn,,CNN,,These gadgets are changing the way moms pump breast milk https://cnn.it/2CeWNFP pic.twitter.com/CEU1G5ecOk,,gadgets changing way moms pump breast milk,,130,,36,,1547501400,,2019-01-14 16:30:00
@cnn,,CNN,,Pacific Gas and Electric, California's largest utility, is headed to bankruptcy court after facing billions of dollars in claims from the deadly 2018 Camp Fire https://cnn.it/2D7Om0H pic.twitter.com/NVyimwW94I,,pacific gas electric californias largest utility headed bankruptcy court facing billions dollars claims deadly 2018 camp fire,,221,,118,,1547500809,,2019-01-14 16:20:09
@cnn,,CNN,,Attorney General nominee William Barr says that, if confirmed, he would let special counsel Robert Mueller finish his investigation into Russian meddling in the 2016 president election and believes the results should be made public https://cnn.it/2FwvpGF pic.twitter.com/Dw7L0oIcRn,,attorney general nominee william barr says that confirmed would let special counsel robert mueller finish investigation russian meddling 2016 president election believes results made public,,516,,142,,1547500206,,2019-01-14 16:10:06
@cnn,,CNN,,More than 32,000 teachers and staff are walking off the job today in LA.  “Of course we want a pay raise, but the main issues are class size reduction and to end the privatization of public schools with unregulated charter growth,” one veteran teacher says https://cnn.it/2Hcg00T pic.twitter.com/HcBPxTDJFv,,32000 teachers staff walking job today la  “of course want pay raise main issues class size reduction end privatization public schools unregulated charter growth” one veteran teacher says,,3924,,1845,,1547499615,,2019-01-14 16:00:15
@cnn,,CNN,,President Trump says he is not considering declaring a national emergency, which would allow him to bypass Congress and obtain funding to build his long-promised border wallhttps://cnn.it/2FB3eql ,,president trump says considering declaring national emergency would allow bypass congress obtain funding build longpromised border,,333,,125,,1547499003,,2019-01-14 15:50:03
@cnn,,CNN,,The ongoing partial government shutdown became the longest government shutdown in US history on Saturday https://cnn.it/2FyIoYr pic.twitter.com/hdWkiNhdUi,,ongoing partial government shutdown became longest government shutdown us history saturday,,128,,63,,1547498406,,2019-01-14 15:40:06
@cnn,,CNN,,President Trump: "I never worked for Russia" https://cnn.it/2D6iR7e pic.twitter.com/Oqjv8Mt9Jr,,president trump i never worked russia,,227,,66,,1547497805,,2019-01-14 15:30:05
@cnn,,CNN,,These 3 Republican senators say they would break from Trump to reopen the government  https://cnn.it/2FukQUJ pic.twitter.com/ne7yX9lKiW,,3 republican senators say would break trump reopen government,,545,,151,,1547497206,,2019-01-14 15:20:06
@cnn,,CNN,,Three police officers have been gunned down across the US in the last five days -- two in Southern cities and a third in California https://cnn.it/2Fxwpu5 pic.twitter.com/7kvgMNb5MO,,three police officers gunned across us last five days  two southern cities third california,,234,,133,,1547496604,,2019-01-14 15:10:04
@cnn,,CNN,,Danone's getting serious about low-sugar yogurt https://cnn.it/2D8zEXx pic.twitter.com/qf1ImFnQ2d,,danones getting serious lowsugar yogurt,,123,,39,,1547496014,,2019-01-14 15:00:14
@cnn,,CNN,,Transcripts show the FBI discussed whether President Trump followed Russia's directions as well as whether he acted completely within his authority http://cnn.it/2D9oPEk pic.twitter.com/ZEFMGm8vGe,,transcripts show fbi discussed whether president trump followed russias directions well whether acted completely within authority,,327,,159,,1547495400,,2019-01-14 14:50:00
@cnn,,CNN,,Worried about the economy? Watch bank earnings https://cnn.it/2D9vQ8k pic.twitter.com/afYJCTbLk1,,worried economy watch bank earnings,,79,,31,,1547495375,,2019-01-14 14:49:35
@cnn,,cnni,,JUST IN: Gdansk mayor Pawel Adamowicz has died after being stabbed on stage yesterdayhttp://cnn.it/2Fxeyni ,,in gdansk mayor pawel adamowicz died stabbed stage,,124,,103,,1547494142,,2019-01-14 14:29:02
@cnn,,CNN,,77 (and counting) very real direct effects of the partial government shutdown https://cnn.it/2D8zAqx pic.twitter.com/miFfpL1sQP,,77 and counting real direct effects partial government shutdown,,167,,76,,1547494807,,2019-01-14 14:40:07
@cnn,,CNN,,Democratic Rep. Tulsi Gabbard in the early 2000s touted working for her father's anti-gay organization, which mobilized to pass a measure against same-sex marriage in Hawaii and promoted controversial conversion therapy https://cnn.it/2D8hQMf pic.twitter.com/zLa0EUsiyS,,democratic rep tulsi gabbard early 2000s touted working fathers antigay organization mobilized pass measure samesex marriage hawaii promoted controversial conversion therapy,,156,,126,,1547494207,,2019-01-14 14:30:07
@cnn,,CNN,,For the first time on record the odds of accidentally dying from an opioid overdose in the United States are now greater than those of dying in an automobile accident https://cnn.it/2D9zkI6 pic.twitter.com/JP7RrqyNhT,,first time record odds accidentally dying opioid overdose united states greater dying automobile accident,,549,,470,,1547493668,,2019-01-14 14:21:08
@cnn,,CNN,,CNN's @ChristineRomans has today's top business headlines before the opening bell on Wall Street http://cnn.it/2H8Gnog pic.twitter.com/wfIJW2pxB0,,cnns christineromans todays top business headlines opening bell wall street,,56,,24,,1547493240,,2019-01-14 14:14:00
@cnn,,CNN,,New York City Mayor Bill de Blasio says some moderate Democrats were wrong not to stake out a bolder agenda following the party's national losses in 2016 https://cnn.it/2FyuuW8 pic.twitter.com/AmE40shG4c,,new york city mayor bill de blasio says moderate democrats wrong stake bolder agenda following partys national losses 2016,,119,,36,,1547492892,,2019-01-14 14:08:12
@cnn,,CNN,,The border wall solution Trump hasn't thought of | Julian Zelizer and Michael Zeldin for @CNNopinion https://cnn.it/2D9FkR1 pic.twitter.com/oY7raoJVtU,,border wall solution trump thought  julian zelizer michael zeldin cnnopinion,,102,,50,,1547492407,,2019-01-14 14:00:07
@cnn,,CNN,,Amid the longest government shutdown in US history, a majority say President Trump bears more responsibility for it than the Democrats in Congress, according to a new CNN poll https://cnn.it/2QHPxaV pic.twitter.com/vstTd3GdiJ,,amid longest government shutdown us history majority say president trump bears responsibility democrats congress according new cnn poll,,588,,173,,1547491800,,2019-01-14 13:50:00
@cnn,,CNN,,This new Indian electronic music genre is fusing religion and politics https://cnn.it/2D8MGEa pic.twitter.com/M3uiOgHMem,,new indian electronic music genre fusing religion politics,,74,,30,,1547491759,,2019-01-14 13:49:19
@cnn,,CNN,,"If, as the White House says, Trump has no compromised relationship with Russia, why does he go out of his way to hide his interactions with Putin?" | Analysis by @stcollinsonhttps://cnn.it/2D8qdaz ,,if white house says trump compromised relationship russia go way hide interactions putin  analysis,,926,,244,,1547491206,,2019-01-14 13:40:06
@cnn,,CNN,,An Alabama police sergeant was killed and another officer critically wounded in a shooting in Birmingham early Sunday, police say https://cnn.it/2FuKt7P pic.twitter.com/QfxBPgAKKr,,alabama police sergeant killed another officer critically wounded shooting birmingham early sunday police say,,136,,71,,1547490607,,2019-01-14 13:30:07
@cnn,,CNN,,White House economic adviser Kevin Hassett says furloughed federal workers who aren't getting paid during the partial government shutdown are "better off" because they didn't have to use vacation days https://cnn.it/2DaQtB1 pic.twitter.com/MT0jTeH2ps,,white house economic adviser kevin hassett says furloughed federal workers getting paid partial government shutdown better off use vacation days,,300,,263,,1547490003,,2019-01-14 13:20:03
@cnn,,CNN,,Maroon 5 will headline Super Bowl LIII halftime show with guests Big Boi and Travis Scott https://cnn.it/2DaiMzH pic.twitter.com/JgK713pguH,,maroon 5 headline super bowl liii halftime show guests big boi travis scott,,379,,85,,1547489408,,2019-01-14 13:10:08
@cnn,,CNN,,This weekend, Canadian air traffic controllers ordered hundreds of pizzas for their American counterparts working without pay due to the ongoing US government shutdown https://cnn.it/2D9uOsW pic.twitter.com/AULhHxS13x,,weekend canadian air traffic controllers ordered hundreds pizzas american counterparts working without pay due ongoing us government shutdown,,1179,,216,,1547488805,,2019-01-14 13:00:05
@cnn,,CNN,,"Stop, stop, just stop -- What are you doing? You're f---ing it all up, Mick": President Trump lashed out at acting chief of staff Mick Mulvaney during a Situation Room meeting with Democrats earlier this month, a White House official says https://cnn.it/2FvBQd6 pic.twitter.com/14HrhuNUUj,,stop stop stop  doing fing up mick president trump lashed acting chief staff mick mulvaney situation room meeting democrats earlier month white house official says,,814,,350,,1547488204,,2019-01-14 12:50:04
@cnn,,CNN,,A security checkpoint inside the George Bush Intercontinental Airport in Houston closed Sunday evening due to "staffing issues associated with the partial shutdown of the federal government." https://cnn.it/2DafRad pic.twitter.com/gepdUZIQjR,,security checkpoint inside george bush intercontinental airport houston closed sunday evening due staffing issues associated partial shutdown federal government,,194,,94,,1547487604,,2019-01-14 12:40:04
@cnn,,CNN,,5 things for Monday:  - President Trump - TSA - Obamacare - Los Angeles teacher's strike - Weather  https://cnn.it/2FxiBQw pic.twitter.com/yprZHWxATY,,5 things monday   president trump  tsa  obamacare  los angeles teachers strike  weather,,182,,67,,1547487006,,2019-01-14 12:30:06
@cnn,,CNN,,You may no longer be more likely to go into cardiac arrest on Monday morning, a study says  https://cnn.it/2D9eY1y pic.twitter.com/Sk0eNporn6,,may longer likely go cardiac arrest monday morning study says,,131,,49,,1547486650,,2019-01-14 12:24:10
@cnn,,CNN,,Someone stole a giant bronze hippo, and the owners want it back https://cnn.it/2FAKgzM pic.twitter.com/0lIdfMYQBh,,someone stole giant bronze hippo owners want back,,362,,113,,1547486296,,2019-01-14 12:18:16
@cnn,,cnni,,JUST IN: Andy Murray loses #AusOpen thriller to Roberto Bautista Agut https://cnn.it/2FygbB1 ,,in andy murray loses ausopen thriller roberto bautista agut,,167,,58,,1547486037,,2019-01-14 12:13:57
@cnn,,CNN,,Democratic Sen. Mark Warner predicts that observers will eventually believe President Trump mishandled the standoff that has created the ongoing government shutdown https://cnn.it/2FyJBzc pic.twitter.com/5J7OcqfHZa,,democratic sen mark warner predicts observers eventually believe president trump mishandled standoff created ongoing government shutdown,,246,,60,,1547485762,,2019-01-14 12:09:22
@cnn,,NewDay,,“I am a human being and I will do this for everybody”: This Milwaukee bus driver stopped her bus and ran out to scoop up a baby girl, barefoot in freezing temperatures, who was quickly walking toward an intersection https://cnn.it/2CbLDBP pic.twitter.com/miXNPCOfSc,,“i human everybody” milwaukee bus driver stopped bus ran scoop baby girl barefoot freezing temperatures quickly walking toward intersection,,1107,,214,,1547485346,,2019-01-14 12:02:26
@cnn,,CNN,,More than 32,000 Los Angeles teachers and staff members will walk off the job today in the country's second-biggest school district. That means about 600,000 kids will have no idea when they'll see their teachers again. https://cnn.it/2FydyPF pic.twitter.com/aZagAnbjRT,,32000 los angeles teachers staff members walk job today countrys secondbiggest school district means 600000 kids idea theyll see teachers again,,347,,155,,1547485212,,2019-01-14 12:00:12
@cnn,,CNN,,A traveler carrying a firearm successfully boarded a flight from Atlanta Hartsfield-Jackson International Airport and flew to Tokyo Narita International Airport on Jan. 3, according to a statement from the Transportation Security Administration https://cnn.it/2D7tVkG pic.twitter.com/qIcl5JKlkz,,traveler carrying firearm successfully boarded flight atlanta hartsfieldjackson international airport flew tokyo narita international airport jan 3 according statement transportation security administration,,390,,299,,1547484604,,2019-01-14 11:50:04
@cnn,,CNN,,An inmate serving a life sentence for the first-degree murder of his 8-year-old neighbor was killed in his prison cell Friday, according to the Oklahoma Department of Corrections https://cnn.it/2D8YbeT pic.twitter.com/9EAvSIY8i6,,inmate serving life sentence firstdegree murder 8yearold neighbor killed prison cell friday according oklahoma department corrections,,385,,91,,1547484005,,2019-01-14 11:40:05
@cnn,,NewDay,,Amid the longest government shutdown in US history, a majority say President Trump bears more responsibility for it than the Democrats in Congress, according to a new CNN poll https://cnn.it/2QHPxaV pic.twitter.com/bj3dXu3x87,,amid longest government shutdown us history majority say president trump bears responsibility democrats congress according new cnn poll,,1068,,283,,1547483320,,2019-01-14 11:28:40
@cnn,,CNN,,Iran summons Polish diplomat over planned "anti-Iranian" Warsaw conference https://cnn.it/2D5Qk1C pic.twitter.com/hgMOvrzGkr,,iran summons polish diplomat planned antiiranian warsaw conference,,75,,28,,1547483243,,2019-01-14 11:27:23
@cnn,,CNN,,Missy Elliott becomes the first female hip-hop artist to be inducted into the Songwriters Hall of Fame https://cnn.it/2FxazHm pic.twitter.com/LV6RMXUAqj,,missy elliott becomes first female hiphop artist inducted songwriters hall fame,,1577,,299,,1547482729,,2019-01-14 11:18:49
@cnn,,CNN,,JUST IN: Transcripts show the FBI discussed whether Trump followed Russia's directions as well as whether he acted completely within his authority https://cnn.it/2D8wJOi pic.twitter.com/KcSDCduIu3,,in transcripts show fbi discussed whether trump followed russias directions well whether acted completely within authority,,695,,311,,1547482190,,2019-01-14 11:09:50
@cnn,,CNN,,Digital First Media is "notorious for slash-and-burn tactics," writes @brianstelterhttps://cnn.it/2Fv577O ,,digital first media notorious slashandburn tactics writes,,91,,54,,1547481874,,2019-01-14 11:04:34
@cnn,,CNN,,Everyone is flipping for this gymnast's perfect 10 routine https://cnn.it/2D88no7 pic.twitter.com/XxBco8OrEz,,everyone flipping gymnasts perfect 10 routine,,349,,47,,1547481520,,2019-01-14 10:58:40
@cnn,,CNN,,People over the age of 65 share fake news stories on Facebook more than any other age group, according to a study https://cnn.it/2FwNRyT pic.twitter.com/FLCxoaMSWb,,people age 65 share fake news stories facebook age group according study,,534,,203,,1547481174,,2019-01-14 10:52:54
@cnn,,CNN,,A leftist Italian fugitive has been detained in Bolivia and will be sent to Italy as "a little gift" from far-right Brazilian President Jair Bolsonaro to Italy's hardline Interior Minister Matteo Salvini https://cnn.it/2FwtWQL pic.twitter.com/XdbkpT2av2,,leftist italian fugitive detained bolivia sent italy a little gift farright brazilian president jair bolsonaro italys hardline interior minister matteo salvini,,98,,51,,1547480662,,2019-01-14 10:44:22
@cnn,,CNN,,The world's oceans are warming at an accelerated rate and are much warmer than scientists thought, according to a new studyhttps://cnn.it/2FtZAya ,,worlds oceans warming accelerated rate much warmer scientists thought according new,,335,,231,,1547480156,,2019-01-14 10:35:56
@cnn,,CNN,,A popular discount chain, known for its comical promotion of "semi-lovely" stores, is buying up the remains of Toys 'R' Us https://cnn.it/2D92maQ pic.twitter.com/I3iOk0L1V9,,popular discount chain known comical promotion semilovely stores buying remains toys r us,,101,,41,,1547479647,,2019-01-14 10:27:27
@cnn,,CNN,,Chris Pratt and Katherine Schwarzenegger are engaged https://cnn.it/2FwZyWh pic.twitter.com/1ZdP9HNMff,,chris pratt katherine schwarzenegger engaged,,341,,90,,1547479139,,2019-01-14 10:18:59
@cnn,,cnni,,A Boeing 707 cargo plane crashed in Iran Monday, killing at least eight people on board, according to Iranian state media https://cnn.it/2Fx21jK pic.twitter.com/BDfgD844kF,,boeing 707 cargo plane crashed iran monday killing least eight people board according iranian state media,,180,,104,,1547478783,,2019-01-14 10:13:03
@cnn,,CNN,,University of Michigan hires -- and then fires -- former head of USA Gymnastics' women's program https://cnn.it/2Da44st pic.twitter.com/dvmJyIQXeC,,university michigan hires  fires  former head usa gymnastics womens program,,95,,31,,1547478635,,2019-01-14 10:10:35
@cnn,,CNN,,An inmate who was killed in his prison cell Friday was serving a life sentence for the murder of an 8-year-old girl. "His cellmate is believed to be responsible for his death," says the Oklahoma Department of Correctionshttps://cnn.it/2D7P8uG ,,inmate killed prison cell friday serving life sentence murder 8yearold girl his cellmate believed responsible death says oklahoma department,,415,,95,,1547478297,,2019-01-14 10:04:57
@cnn,,CNN,,The high temperatures are taking an increasing toll on wildlifehttps://cnn.it/2D9fexq ,,high temperatures taking increasing toll,,149,,77,,1547477953,,2019-01-14 09:59:13
@cnn,,CNN,,What to look out for at the Australian Open https://cnn.it/2FwntVZ pic.twitter.com/KNE0x5FQOO,,look australian open,,105,,25,,1547477547,,2019-01-14 09:52:27
@cnn,,CNN,,The National Weather Service said the Washington metro area, Maryland and Virginia may see another snowy inch blanket roadshttps://cnn.it/2FxnU2r ,,national weather service said washington metro area maryland virginia may see another snowy inch blanket,,94,,38,,1547477054,,2019-01-14 09:44:14
@cnn,,CNN,,Trust us, BTS and Girls' Generation lovers -- you gotta get to Seoulhttps://cnn.it/2D97wn0 ,,trust us bts girls generation lovers  gotta get,,151,,54,,1547476647,,2019-01-14 09:37:27
@cnn,,CNN,,Illinois fairgrounds denies permit for R. Kelly show, citing security and protests https://cnn.it/2D9Vjyt pic.twitter.com/JhTiquKdQI,,illinois fairgrounds denies permit r kelly show citing security protests,,337,,91,,1547476164,,2019-01-14 09:29:24
@cnn,,CNN,,British Prime Minister Theresa May: Approve my deal or risk no Brexit at allhttps://cnn.it/2D8sfaI ,,british prime minister theresa may approve deal risk brexit,,105,,41,,1547475658,,2019-01-14 09:20:58
@cnn,,CNN,,World's biggest aircraft moves toward commercial model https://cnn.it/2FwVvJO pic.twitter.com/1ge4IJUSUI,,worlds biggest aircraft moves toward commercial model,,226,,52,,1547475601,,2019-01-14 09:20:01
@cnn,,CNN,,The White House's National Security Council asked the Pentagon last year for plans for launching a military attack against Iran, the Wall Street Journal reports https://cnn.it/2D7YgzF pic.twitter.com/u1kpXvrpU6,,white houses national security council asked pentagon last year plans launching military attack iran wall street journal reports,,124,,88,,1547475039,,2019-01-14 09:10:39
@cnn,,CNN,,Manchester United's renaissance continues apace under Ole Gunnar Solskjaer https://cnn.it/2FxkQmY pic.twitter.com/7s0smpP3o5,,manchester uniteds renaissance continues apace ole gunnar solskjaer,,129,,30,,1547474535,,2019-01-14 09:02:15
@cnn,,CNN,,Lionel Messi scores 400th league goal for Barcelona https://cnn.it/2D937jY pic.twitter.com/dNUZj2mM5g,,lionel messi scores 400th league goal barcelona,,390,,62,,1547474050,,2019-01-14 08:54:10
@cnn,,CNN,,The two reasons so many Democrats are likely running for president in 2020 https://cnn.it/2D7H3WS  (via @CNNOpinion)pic.twitter.com/qnQiS5Gl0G,,two reasons many democrats likely running president 2020 via cnnopinionpictwittercomqnqis5gl0g,,136,,32,,1547473561,,2019-01-14 08:46:01
@cnn,,CNN,,This week marks the 10th anniversary of the "Miracle on the Hudson," arguably the most famous emergency landing in modern aviation history https://cnn.it/2FA82fD pic.twitter.com/3hy0fsMxM9,,week marks 10th anniversary miracle hudson arguably famous emergency landing modern aviation history,,291,,88,,1547473068,,2019-01-14 08:37:48
@cnn,,CNN,,President Trump calls question on whether he ever worked for Russia "insulting" https://cnn.it/2Fu95gZ pic.twitter.com/p2ipAI6KNS,,president trump calls question whether ever worked russia insulting,,144,,49,,1547472576,,2019-01-14 08:29:36
@cnn,,CNN,,'Game of Thrones' sets official date for beginning of the end https://cnn.it/2D9OYDb pic.twitter.com/fMNZZbLfhv,,game thrones sets official date beginning end,,451,,126,,1547472081,,2019-01-14 08:21:21
@cnn,,CNN,,This weekend, Canadian air traffic controllers ordered hundreds of pizzas for their American counterparts working without pay due to the ongoing US government shutdownhttps://cnn.it/2FvtuSJ ,,weekend canadian air traffic controllers ordered hundreds pizzas american counterparts working without pay due ongoing us government,,2716,,482,,1547471745,,2019-01-14 08:15:45
@cnn,,CNN,,Maroon 5 will headline Super Bowl LIII halftime show with guests Big Boi and Travis Scott https://cnn.it/2FvlJfD pic.twitter.com/1W7QFFg1Kg,,maroon 5 headline super bowl liii halftime show guests big boi travis scott,,280,,70,,1547471336,,2019-01-14 08:08:56
@cnn,,CNN,,Gunman who killed officer left a note accusing police of hitting him with "sonic waves" https://cnn.it/2FxNnZi pic.twitter.com/GGFZvIrIsI,,gunman killed officer left note accusing police hitting sonic waves,,124,,54,,1547471008,,2019-01-14 08:03:28
@cnn,,CNN,,The top Democrat on the Senate Intelligence Committee bemoans that the US government doesn't know what President Trump and Russian President Vladimir Putin discussed last year at their summit in Helsinki, Finland https://cnn.it/2D8VIBc pic.twitter.com/FFKjkgfd6S,,top democrat senate intelligence committee bemoans us government know president trump russian president vladimir putin discussed last year summit helsinki finland,,200,,80,,1547470670,,2019-01-14 07:57:50
@cnn,,CNN,,Theresa May has embarked on many crucial weeks in her two-and-a-half-year premiership, thanks to Brexit, but these coming days look set to be the most decisive yet | Analysis by @janemerrick23 https://cnn.it/2FxaAer ,,theresa may embarked many crucial weeks twoandahalfyear premiership thanks brexit coming days look set decisive yet  analysis janemerrick23,,69,,26,,1547470144,,2019-01-14 07:49:04
@cnn,,CNN,,Nebraska officials clear doctor being monitored for Ebola https://cnn.it/2Fx8N9d pic.twitter.com/20MsOJZI3V,,nebraska officials clear doctor monitored ebola,,194,,57,,1547469527,,2019-01-14 07:38:47
@cnn,,CNN,,A traveler carrying a firearm successfully boarded a flight from Atlanta Hartsfield-Jackson International Airport and flew to Tokyo Narita International Airport on Jan. 3, according to a statement from the Transportation Security Administration https://cnn.it/2Fwshun pic.twitter.com/CCNWh8Fjp7,,traveler carrying firearm successfully boarded flight atlanta hartsfieldjackson international airport flew tokyo narita international airport jan 3 according statement transportation security administration,,295,,175,,1547469177,,2019-01-14 07:32:57
@cnn,,CNN,,Debt? What debt?  At $22 trillion, here's the argument the national debt doesn't matter: https://cnn.it/2D7LjWh  | Analysis by Z. Byron Wolfpic.twitter.com/ma6Dnf3iWX,,debt debt  22 trillion heres argument national debt matter  analysis z byron wolfpictwittercomma6dnf3iwx,,146,,65,,1547468828,,2019-01-14 07:27:08
@cnn,,CNN,,Polished Putin, tempestuous Trump are a contrast in foreign policy styles https://cnn.it/2FtrSJk  | Analysis by Nathan Hodgepic.twitter.com/jM9dwjVsNg,,polished putin tempestuous trump contrast foreign policy styles  analysis nathan hodgepictwittercomjm9dwjvsng,,113,,30,,1547468483,,2019-01-14 07:21:23
@cnn,,CNN,,Both President Trump and House Speaker Nancy Pelosi think they're winning the shutdown, writes Scott Jennings for @CNNOpinion https://cnn.it/2D8JFUI pic.twitter.com/nhrrvhJ8jS,,president trump house speaker nancy pelosi think theyre winning shutdown writes scott jennings cnnopinion,,149,,40,,1547468136,,2019-01-14 07:15:36
@cnn,,CNN,,"If, as the White House says, Trump has no compromised relationship with Russia, why does he go out of his way to hide his interactions with Putin?" Analysis by @stcollinsonhttps://cnn.it/2FvmIMN ,,if white house says trump compromised relationship russia go way hide interactions putin analysis,,1255,,454,,1547467683,,2019-01-14 07:08:03
@cnn,,CNN,,Historic Shakespeare theater burns to the ground in Connecticut https://cnn.it/2FtYanv pic.twitter.com/e534sExJID,,historic shakespeare theater burns ground connecticut,,108,,44,,1547467351,,2019-01-14 07:02:31
@cnn,,CNN,,Puerto Rico can't afford to pay for President Trump's wall https://cnn.it/2Ftp92y  (via @CNNOpinion)pic.twitter.com/ymwQcJaIFY,,puerto rico cant afford pay president trumps wall via cnnopinionpictwittercomymwqcjaify,,270,,92,,1547467006,,2019-01-14 06:56:46
@cnn,,CNN,,Twelve people have been arrested in Costa Rica and Spain in connection with the suspected kidnapping of an American businessman, authorities say https://cnn.it/2FvfGYt pic.twitter.com/Ihcpd046H3,,twelve people arrested costa rica spain connection suspected kidnapping american businessman authorities say,,132,,60,,1547466669,,2019-01-14 06:51:09
@cnn,,CNN,,There are no detailed records of five personal meetings President Donald Trump has had with Russian President Vladimir Putin, The Washington Post reports https://cnn.it/2FwnOYD pic.twitter.com/4J0FF3QqtP,,detailed records five personal meetings president donald trump russian president vladimir putin washington post reports,,344,,182,,1547466330,,2019-01-14 06:45:30
@cnn,,CNN,,Canada wants to welcome more than 1 million new permanent residents in the next three years. That's nearly one percent of the country's population each year https://cnn.it/2FAHNWr ,,canada wants welcome 1 million new permanent residents next three years thats nearly one percent countrys population year,,1203,,265,,1547465993,,2019-01-14 06:39:53
@cnn,,CNN,,This pilot photographs storms from the airplane cockpit https://cnn.it/2FvdxvT pic.twitter.com/J2Ox5hX3lv,,pilot photographs storms airplane cockpit,,2198,,643,,1547465582,,2019-01-14 06:33:02
@cnn,,CNN,,The Critics' Choice Awards served up some surprise winners -- and adventurous fashion choices from men on the blue carpet https://cnn.it/2D7sPVY pic.twitter.com/l7dX3U1Zgl,,critics choice awards served surprise winners  adventurous fashion choices men blue carpet,,142,,30,,1547465251,,2019-01-14 06:27:31
@cnn,,CNN,,The best passport to hold in 2019 is ... Japan. Again. It retains its top spot as the world's most travel-friendly passport thanks to the document's access to 190 countries. https://cnn.it/2D80HlD pic.twitter.com/nF8FWgfElK,,best passport hold 2019  japan again retains top spot worlds travelfriendly passport thanks documents access 190 countries,,637,,266,,1547464800,,2019-01-14 06:20:00
@cnn,,CNN,,Ahead of this week's parliamentary vote on Prime Minister Theresa May's Brexit deal, it's time to go back to basics -- here's everything you need to know about the divorce between the EU and the UK: http://cnn.it/2D7WGgW pic.twitter.com/HuAVVd8By7,,ahead weeks parliamentary vote prime minister theresa mays brexit deal time go back basics  heres everything need know divorce eu uk,,154,,70,,1547464465,,2019-01-14 06:14:25
@cnn,,CNN,,Astronomers believe that a recently discovered super-Earth, only six light-years away, might be able to support life https://cnn.it/2D8s1QH pic.twitter.com/EIgOTqqdtc,,astronomers believe recently discovered superearth six lightyears away might able support life,,620,,178,,1547464453,,2019-01-14 06:14:13
@cnn,,CNN,,Smugglers in the trial of notorious cartel leader Joaquin "El Chapo" Guzman say they relied on boats, trains and cars at legal points of entry. None testified about using unwalled sections of the border. https://cnn.it/2D7uDhZ pic.twitter.com/G2XQn2TfON,,smugglers trial notorious cartel leader joaquin el chapo guzman say relied boats trains cars legal points entry none testified using unwalled sections border,,1011,,414,,1547464018,,2019-01-14 06:06:58
@cnn,,CNN,,The total fertility rate for the United States in 2017 continued to dip below what's needed for the population to replace itself, according to a new report https://cnn.it/2Fvgj4d pic.twitter.com/XiQBWllxOB,,total fertility rate united states 2017 continued dip whats needed population replace itself according new report,,242,,89,,1547463611,,2019-01-14 06:00:11
@cnn,,CNN,,President Trump blasts recent media reports that raised questions about his private meetings with Russian President Vladimir Putin and revealed an FBI investigation into his behavior after he fired FBI Director James Comey https://cnn.it/2D8JOYe pic.twitter.com/RPfzDn9IIK,,president trump blasts recent media reports raised questions private meetings russian president vladimir putin revealed fbi investigation behavior fired fbi director james comey,,240,,82,,1547463157,,2019-01-14 05:52:37
@cnn,,CNN,,President Trump lashed out at acting chief of staff Mick Mulvaney during a Situation Room meeting with Democrats, including House Speaker Nancy Pelosi and Senate Minority Leader Chuck Schumer, earlier this month, a White House official says https://cnn.it/2FuAvDq pic.twitter.com/eiV5Q1oo1e,,president trump lashed acting chief staff mick mulvaney situation room meeting democrats including house speaker nancy pelosi senate minority leader chuck schumer earlier month white house official says,,201,,104,,1547462702,,2019-01-14 05:45:02
@cnn,,CNN,,A mass drug overdose at a home in Northern California has killed one person and sent more than a dozen others to hospitals, police say. Chico Police Chief Michael O'Brien says the main substance involved is believed to be fentanyl. https://cnn.it/2FwoNZ1 pic.twitter.com/vkYStZnASi,,mass drug overdose home northern california killed one person sent dozen others hospitals police say chico police chief michael obrien says main substance involved believed fentanyl,,187,,103,,1547462145,,2019-01-14 05:35:45
@cnn,,CNN,,After killing at least 7 in the Midwest, winter storm hits DC and surrounding areas https://cnn.it/2FvmfKy pic.twitter.com/auOHlkJRZX,,killing least 7 midwest winter storm hits dc surrounding areas,,174,,77,,1547461805,,2019-01-14 05:30:05
@cnn,,CNN,,White House economic adviser Kevin Hassett says furloughed federal workers who aren't getting paid during the partial government shutdown are "better off" because they didn't have to use vacation days https://cnn.it/2FwUtxt pic.twitter.com/yrugJxUKAe,,white house economic adviser kevin hassett says furloughed federal workers getting paid partial government shutdown better off use vacation days,,262,,168,,1547461210,,2019-01-14 05:20:10
@cnn,,CNN,,UCLA gymnast earns perfect 10 for routine, social media flips out https://cnn.it/2D8CmfC pic.twitter.com/qk0EsOpLH1,,ucla gymnast earns perfect 10 routine social media flips,,1096,,124,,1547460903,,2019-01-14 05:15:03
@cnn,,CNN,,As Jayme Closs starts her road to recovery following her kidnapping, investigators are trying to piece together what happened during the nearly three months she was in captivity https://cnn.it/2D6RpGC pic.twitter.com/DLIwji61tF,,jayme closs starts road recovery following kidnapping investigators trying piece together happened nearly three months captivity,,197,,59,,1547460005,,2019-01-14 05:00:05
@cnn,,CNN,,President Trump threatens to "devastate" Turkey's economy if they attack Kurds in Syria https://cnn.it/2Fuo3na pic.twitter.com/hfJRSZ7ldg,,president trump threatens devastate turkeys economy attack kurds syria,,304,,138,,1547459109,,2019-01-14 04:45:09
@cnn,,CNN,,Trump calls Joe Biden "weak," says Obama took him off the "trash heap" https://cnn.it/2FuWSIR pic.twitter.com/rYBeJvmy2g,,trump calls joe biden weak says obama took trash heap,,395,,116,,1547458207,,2019-01-14 04:30:07
@cnn,,CNN,,A California federal district court judge halted the Trump administration's weakening of Obamacare's contraceptive mandate on Sunday, a day before the new rules were to take effecthttps://cnn.it/2Fwl7WZ ,,california federal district court judge halted trump administrations weakening obamacares contraceptive mandate sunday day new rules take,,560,,153,,1547457943,,2019-01-14 04:25:43
@cnn,,CNN,,Here's what you need to know to start your week smart https://cnn.it/2D7ukDN pic.twitter.com/KSaiKSYoIi,,heres need know start week smart,,69,,20,,1547457307,,2019-01-14 04:15:07
@cnn,,CNN,,'Game of Thrones' sets official date for beginning of the end https://cnn.it/2D9ZWIP pic.twitter.com/sMkcH0r9TS,,game thrones sets official date beginning end,,666,,197,,1547457168,,2019-01-14 04:12:48
@cnn,,CNN,,Gunman who killed officer left a note accusing police of hitting him with "sonic waves" https://cnn.it/2D7rVIZ pic.twitter.com/UwqSAzOYp8,,gunman killed officer left note accusing police hitting sonic waves,,223,,73,,1547456412,,2019-01-14 04:00:12
@cnn,,CNN,,President Trump calls question on whether he ever worked for Russia "insulting" https://cnn.it/2D8Kywn pic.twitter.com/tJJfrnVd3h,,president trump calls question whether ever worked russia insulting,,230,,72,,1547455508,,2019-01-14 03:45:08
@cnn,,CNN,,This weekend, Canadian air traffic controllers ordered hundreds of pizzas for their American counterparts working without pay due to the ongoing US government shutdownhttps://cnn.it/2D7fSLQ ,,weekend canadian air traffic controllers ordered hundreds pizzas american counterparts working without pay due ongoing us government,,12527,,2471,,1547455480,,2019-01-14 03:44:40
@cnn,,CNN,,Iran summons Polish diplomat over planned "anti-Iranian" Warsaw conference https://cnn.it/2FxisMP pic.twitter.com/w5uaRWFRrb,,iran summons polish diplomat planned antiiranian warsaw conference,,81,,29,,1547454612,,2019-01-14 03:30:12
@cnn,,CNN,,What to look out for at the Australian Open https://cnn.it/2Fw7O9e pic.twitter.com/k3RgOs1BpG,,look australian open,,121,,23,,1547453704,,2019-01-14 03:15:04
@cnn,,CNN,,Worried about the economy? Watch bank earnings https://cnn.it/2Ft1Eqa pic.twitter.com/vaA1ai2rWu,,worried economy watch bank earnings,,170,,72,,1547452811,,2019-01-14 03:00:11
@cnn,,CNN,,This new Indian electronic music genre is fusing religion and politics https://cnn.it/2Fwfecu pic.twitter.com/yfgTdgKPlT,,new indian electronic music genre fusing religion politics,,102,,33,,1547451907,,2019-01-14 02:45:07
@cnn,,CNN,,A leftist Italian fugitive has been detained in Bolivia and will be sent to Italy as "a little gift" from far-right Brazilian President Jair Bolsonaro to Italy's hardline Interior Minister Matteo Salvini https://cnn.it/2Fxnt7Z pic.twitter.com/X26r6peltW,,leftist italian fugitive detained bolivia sent italy a little gift farright brazilian president jair bolsonaro italys hardline interior minister matteo salvini,,151,,69,,1547451011,,2019-01-14 02:30:11
@cnn,,CNN,,Someone stole a giant bronze hippo, and the owners want it back https://cnn.it/2FzgtYB pic.twitter.com/31qGcPeGRR,,someone stole giant bronze hippo owners want back,,454,,132,,1547450105,,2019-01-14 02:15:05
@cnn,,CNN,,Debt? What debt?  At $22 trillion, here's the argument the national debt doesn't matter: https://cnn.it/2Fw2eUk  | Analysis by Z. Byron Wolfpic.twitter.com/GhfNw89wLi,,debt debt  22 trillion heres argument national debt matter  analysis z byron wolfpictwittercomghfnw89wli,,173,,84,,1547449214,,2019-01-14 02:00:14
@cnn,,CNN,,It's a day to honor MLK but the government shutdown is messing up people's plans https://cnn.it/2FsMXDI pic.twitter.com/D8WJS3KUa2,,day honor mlk government shutdown messing peoples plans,,208,,64,,1547448309,,2019-01-14 01:45:09
@cnn,,CNN,,World's biggest aircraft moves toward commercial model https://cnn.it/2FxyYN4 pic.twitter.com/NmumlrVy0U,,worlds biggest aircraft moves toward commercial model,,326,,91,,1547447408,,2019-01-14 01:30:08
@cnn,,CNN,,White House economic adviser Kevin Hassett says furloughed federal workers who aren't getting paid during the partial government shutdown are "better off" because they didn't have to use vacation days https://cnn.it/2FsKFo6 pic.twitter.com/otfMzr6OfA,,white house economic adviser kevin hassett says furloughed federal workers getting paid partial government shutdown better off use vacation days,,318,,266,,1547446510,,2019-01-14 01:15:10
@cnn,,CNN,,Nebraska officials clear doctor being monitored for Ebola https://cnn.it/2D8zEqc pic.twitter.com/WFNzXOZ9cp,,nebraska officials clear doctor monitored ebola,,210,,55,,1547445612,,2019-01-14 01:00:12
@cnn,,CNN,,This week marks the 10th anniversary of the "Miracle on the Hudson," arguably the most famous emergency landing in modern aviation history https://cnn.it/2Fzaz9T pic.twitter.com/fdQQtwbKjd,,week marks 10th anniversary miracle hudson arguably famous emergency landing modern aviation history,,918,,293,,1547444707,,2019-01-14 00:45:07
@cnn,,CNN,,Lionel Messi scores 400th league goal for Barcelona https://cnn.it/2D8aVCM pic.twitter.com/guqOuTaeyd,,lionel messi scores 400th league goal barcelona,,530,,101,,1547443805,,2019-01-14 00:30:05
@cnn,,CNN,,President Trump blasts recent media reports that raised questions about his private meetings with Russian President Vladimir Putin and revealed an FBI investigation into his behavior after he fired FBI Director James Comey https://cnn.it/2FuK2dA pic.twitter.com/XfHGbkJnMZ,,president trump blasts recent media reports raised questions private meetings russian president vladimir putin revealed fbi investigation behavior fired fbi director james comey,,264,,90,,1547442907,,2019-01-14 00:15:07
@cnn,,CNN,,"It's unbelievable, that's for sure." Austrian skier Marcel Hirscher reflects in on his impressively consistent form and dominance in the sport. https://cnn.it/2FuIpN0 pic.twitter.com/dfQwfnrXGL,,its unbelievable thats sure austrian skier marcel hirscher reflects impressively consistent form dominance sport,,89,,29,,1547442014,,2019-01-14 00:00:14
@cnn,,CNN,,Polished Putin, tempestuous Trump are a contrast in foreign policy styles https://cnn.it/2FtToX6  | Analysis by Nathan Hodgepic.twitter.com/ay01UuG7oA,,polished putin tempestuous trump contrast foreign policy styles  analysis nathan hodgepictwittercomay01uug7oa,,157,,53,,1547441106,,2019-01-13 23:45:06
@cnn,,CNN,,A traveler carrying a firearm successfully boarded a flight from Atlanta Hartsfield-Jackson International Airport and flew to Tokyo Narita International Airport on Jan. 3, according to a statement from the Transportation Security Administration https://cnn.it/2FwjRU4 pic.twitter.com/TiONDYTRkz,,traveler carrying firearm successfully boarded flight atlanta hartsfieldjackson international airport flew tokyo narita international airport jan 3 according statement transportation security administration,,1311,,1367,,1547440209,,2019-01-13 23:30:09
@cnn,,CNN,,The top Democrat on the Senate Intelligence Committee bemoans that the US government doesn't know what President Trump and Russian President Vladimir Putin discussed last year at their summit in Helsinki, Finland https://cnn.it/2FtOYiY pic.twitter.com/Y0R7Xx8wz9,,top democrat senate intelligence committee bemoans us government know president trump russian president vladimir putin discussed last year summit helsinki finland,,368,,117,,1547439306,,2019-01-13 23:15:06
@cnn,,CNN,,Democratic Sen. Mark Warner predicts that observers will eventually believe President Trump mishandled the standoff that has created the ongoing government shutdown https://cnn.it/2D6S8rt pic.twitter.com/mH8YaWTnUo,,democratic sen mark warner predicts observers eventually believe president trump mishandled standoff created ongoing government shutdown,,269,,70,,1547438404,,2019-01-13 23:00:04
@cnn,,CNN,,Both President Trump and House Speaker Nancy Pelosi think they're winning the shutdown, writes Scott Jennings for @CNNOpinion https://cnn.it/2Fub84A pic.twitter.com/L6qRcwS9sQ,,president trump house speaker nancy pelosi think theyre winning shutdown writes scott jennings cnnopinion,,261,,84,,1547437506,,2019-01-13 22:45:06
@cnn,,CNN,,Maroon 5 will headline Super Bowl LIII halftime show with guests Big Boi and Travis Scott https://cnn.it/2D80or2 pic.twitter.com/AQT0FiJtaT,,maroon 5 headline super bowl liii halftime show guests big boi travis scott,,511,,103,,1547436616,,2019-01-13 22:30:16
@cnn,,CNN,,A complete list of the Critics' Choice Awards nominees https://cnn.it/2D8nePl pic.twitter.com/d1YxUiOdgq,,complete list critics choice awards nominees,,164,,40,,1547435704,,2019-01-13 22:15:04
@cnn,,CNN,,Twelve people have been arrested in Costa Rica and Spain in connection with the suspected kidnapping of an American businessman, authorities say https://cnn.it/2FvFL9V pic.twitter.com/1Bs1Zn8xH7,,twelve people arrested costa rica spain connection suspected kidnapping american businessman authorities say,,136,,57,,1547434802,,2019-01-13 22:00:02
@cnn,,CNN,,Former White House communications director Anthony Scaramucci will be on this season of "Celebrity Big Brother" on CBS, the second straight year that the reality show has featured a prominent member of Donald Trump's White House https://cnn.it/2D7ubjH pic.twitter.com/DO6pTGzTqF,,former white house communications director anthony scaramucci season celebrity big brother cbs second straight year reality show featured prominent member donald trumps white house,,301,,89,,1547433904,,2019-01-13 21:45:04
@cnn,,CNN,,Historic Shakespeare theater burns to the ground in Connecticut https://cnn.it/2FsGRTE pic.twitter.com/GWKk0ckixn,,historic shakespeare theater burns ground connecticut,,142,,92,,1547433004,,2019-01-13 21:30:04
@cnn,,CNN,,Style is more than the things we buy and the things we wear. Style is what we are made of. Don’t miss the premiere of #AmericanStyle on CNN, Tonight at 9p ETpic.twitter.com/20Z9yYqRoc,,style things buy things wear style made of don’t miss premiere americanstyle cnn tonight 9p etpictwittercom20z9yyqroc,,173,,40,,1547432111,,2019-01-13 21:15:11
@cnn,,CNN,,A news helicopter happened across an epic game of Mario Kart being played on the big screen at the Kansas City Royals' Kauffman Stadium (Updates video) http://cnn.it/2SSmkfq pic.twitter.com/5cEOqk4OaQ,,news helicopter happened across epic game mario kart played big screen kansas city royals kauffman stadium updates video,,503,,124,,1547431631,,2019-01-13 21:07:11
@cnn,,CNN,,The two reasons so many Democrats are likely running for president in 2020 https://cnn.it/2D7ru1z  (via @CNNOpinion)pic.twitter.com/0b8hP70aUw,,two reasons many democrats likely running president 2020 via cnnopinionpictwittercom0b8hp70auw,,214,,55,,1547431214,,2019-01-13 21:00:14
@cnn,,CNN,,New York City Mayor Bill de Blasio says some moderate Democrats were wrong not to stake out a bolder agenda following the party's national losses in 2016 https://cnn.it/2D8S2PX pic.twitter.com/BGchovSzdO,,new york city mayor bill de blasio says moderate democrats wrong stake bolder agenda following partys national losses 2016,,179,,37,,1547430310,,2019-01-13 20:45:10
@cnn,,CNN,,Manchester United's renaissance continues apace under Ole Gunnar Solskjaer https://cnn.it/2D86RCu pic.twitter.com/xINseKpJRH,,manchester uniteds renaissance continues apace ole gunnar solskjaer,,359,,74,,1547429410,,2019-01-13 20:30:10
@cnn,,CNN,,In a rare acknowledgment of Israeli operations in Syria, Prime Minister Benjamin Netanyahu says the country's air force struck Syria over the weekend https://cnn.it/2D85UtU pic.twitter.com/zJjrGoQVMC,,rare acknowledgment israeli operations syria prime minister benjamin netanyahu says countrys air force struck syria weekend,,128,,51,,1547428508,,2019-01-13 20:15:08
@cnn,,CNN,,Illinois fairgrounds denies permit for R. Kelly show, citing security and protests https://cnn.it/2D4zWOU pic.twitter.com/yh51Xnjm5A,,illinois fairgrounds denies permit r kelly show citing security protests,,516,,132,,1547427606,,2019-01-13 20:00:06
@cnn,,CNN,,GOP Sen. Ron Johnson warns that if President Trump declares a national emergency on the southern border in order to fund the construction of a border wall, the move is "going to go to court and the wall won't get built" https://cnn.it/2D69V1Q pic.twitter.com/xKKQoDku2i,,gop sen ron johnson warns president trump declares national emergency southern border order fund construction border wall move going go court wall get built,,812,,201,,1547426705,,2019-01-13 19:45:05
@cnn,,CNN,,DNA pioneer stripped of honors over "reprehensible" race comments https://cnn.it/2D80bEc pic.twitter.com/iFoxg08UTW,,dna pioneer stripped honors reprehensible race comments,,181,,79,,1547425805,,2019-01-13 19:30:05
@cnn,,CNN,,People outside Washington, D.C., aren't concerned with the Russia investigation, Texas GOP Sen. Ted Cruz says https://cnn.it/2FvIQXs pic.twitter.com/lrgMPWFOWD,,people outside washington dc concerned russia investigation texas gop sen ted cruz says,,541,,141,,1547424907,,2019-01-13 19:15:07
@cnn,,CNN,,America's week of zero https://cnn.it/2Fx7HKG  (via @CNNOpinion)pic.twitter.com/Iu564CidoL,,americas week zero via cnnopinionpictwittercomiu564cidol,,68,,19,,1547424007,,2019-01-13 19:00:07
@cnn,,CNN,,Puerto Rico can't afford to pay for President Trump's wall https://cnn.it/2D6LgtP  (via @CNNOpinion)pic.twitter.com/jc0dlKTood,,puerto rico cant afford pay president trumps wall via cnnopinionpictwittercomjc0dlktood,,475,,172,,1547423109,,2019-01-13 18:45:09
@cnn,,CNN,,Rep. Kevin McCarthy, the top Republican in the House, says "action will be taken" after Iowa GOP Rep. Steve King's recent comment about white supremacy and white nationalism https://cnn.it/2D6Khd7 pic.twitter.com/JaUHqsTRe1,,rep kevin mccarthy top republican house says action taken iowa gop rep steve kings recent comment white supremacy white nationalism,,318,,93,,1547422205,,2019-01-13 18:30:05
@cnn,,CNN,,President Trump's very private meetings are a huge favor to Russian President Vladimir Putin, writes Samantha Vinograd for @CNNOpinion https://cnn.it/2D6AvrN pic.twitter.com/DMhNNyTayI,,president trumps private meetings huge favor russian president vladimir putin writes samantha vinograd cnnopinion,,380,,171,,1547421307,,2019-01-13 18:15:07
@cnn,,CNN,,Walter V. Shipley, the architect of several bank mega mergers that reshaped the industry, has died at 83 https://cnn.it/2Fwxl1V pic.twitter.com/ii9uIdbqJG,,walter v shipley architect several bank mega mergers reshaped industry died 83,,78,,33,,1547420406,,2019-01-13 18:00:06
@cnn,,CNN,,Missy Elliott becomes the first female hip-hop artist to be inducted into the Songwriters Hall of Fame https://cnn.it/2FufN6y pic.twitter.com/E9azQi9xMm,,missy elliott becomes first female hiphop artist inducted songwriters hall fame,,2246,,415,,1547419505,,2019-01-13 17:45:05
@cnn,,CNN,,A mass drug overdose at a home in Northern California has killed one person and sent more than a dozen others to hospitals, police say. Chico Police Chief Michael O'Brien says the main substance involved is believed to be fentanyl. https://cnn.it/2FzAeiL pic.twitter.com/5JweSUH7Dh,,mass drug overdose home northern california killed one person sent dozen others hospitals police say chico police chief michael obrien says main substance involved believed fentanyl,,211,,167,,1547418743,,2019-01-13 17:32:23
@cnn,,CNN,,The White House's National Security Council asked the Pentagon last year for plans for launching a military attack against Iran, the Wall Street Journal reports https://cnn.it/2FudiRH pic.twitter.com/GQ3gCbnpFi,,white houses national security council asked pentagon last year plans launching military attack iran wall street journal reports,,162,,105,,1547417703,,2019-01-13 17:15:03
@cnn,,CNN,,95% of Americans wear t-shirts. Did this style staple start with actor #MarlonBrando? Find out how the t-shirt influenced #AmericanStyle, Tonight at 9p ET on CNNpic.twitter.com/GamAdz2LfO,,95 americans wear tshirts style staple start actor marlonbrando find tshirt influenced americanstyle tonight 9p et cnnpictwittercomgamadz2lfo,,549,,144,,1547416835,,2019-01-13 17:00:35
@cnn,,CNN,,Leeds United's Argentine manager Marcelo Bielsa has left his club embarrassed after trying to spy on an opposition team ahead of a key game. (A previous tweet that incorrectly said he left the club has been removed). https://cnn.it/2D8E2FT pic.twitter.com/WssXEzzMv0,,leeds uniteds argentine manager marcelo bielsa left club embarrassed trying spy opposition team ahead key game a previous tweet incorrectly said left club removed,,107,,32,,1547416453,,2019-01-13 16:54:13
@cnn,,CNN,,Smugglers in the trial of notorious cartel leader Joaquin "El Chapo" Guzman say they relied on boats, trains and cars at legal points of entry. None testified about using unwalled sections of the border. https://cnn.it/2D7ZLxJ pic.twitter.com/nw3ulrhQIH,,smugglers trial notorious cartel leader joaquin el chapo guzman say relied boats trains cars legal points entry none testified using unwalled sections border,,2359,,1095,,1547415910,,2019-01-13 16:45:10
@cnn,,CNN,,A popular discount chain, known for its comical promotion of "semi-lovely" stores, is buying up the remains of Toys 'R' Us https://cnn.it/2FyO9Fo pic.twitter.com/FAeYq5IAqn,,popular discount chain known comical promotion semilovely stores buying remains toys r us,,150,,49,,1547415007,,2019-01-13 16:30:07
@cnn,,CNN,,A recovering Justice Ruth Bader Ginsburg missed arguments last week and will do so again this week, prompting some uncertainty about the Supreme Court's political future https://cnn.it/2D79ww9 pic.twitter.com/XtNFvzobxb,,recovering justice ruth bader ginsburg missed arguments last week week prompting uncertainty supreme courts political future,,328,,93,,1547414467,,2019-01-13 16:21:07
@cnn,,CNN,,Astronomers believe that a recently discovered super-Earth, only six light-years away, might be able to support life https://cnn.it/2FuXdLx pic.twitter.com/nNe9QIcxXB,,astronomers believe recently discovered superearth six lightyears away might able support life,,720,,199,,1547413267,,2019-01-13 16:01:07
@cnn,,CNN,,CNN’s @FareedZakaria: "Today I believe that an urgent task for Congress is to write laws that explicitly limit and check the powers of the president. I would take polarization over Putinism any day."pic.twitter.com/7H35tzubC1,,cnn’s fareedzakaria today believe urgent task congress write laws explicitly limit check powers president would take polarization putinism daypictwittercom7h35tzubc1,,2461,,702,,1547411606,,2019-01-13 15:33:26
@cnn,,CNN,,A news helicopter happened across an epic game of Mario Kart being played on the big screen at the Kansas City Royals' Kauffman Stadium https://cnn.it/2SSmkfq pic.twitter.com/MLP5iDdgcP,,news helicopter happened across epic game mario kart played big screen kansas city royals kauffman stadium,,248,,55,,1547411460,,2019-01-13 15:31:00
@cnn,,CNN,,“There's still a lot of moderate voices in the party that did not learn the lessons of 2016 and are not listening to what people need in this country,” @NYCMayor Bill de Blasio says. “We could go a lot farther, be a lot bolder than what we’re doing now.” https://cnn.it/2D8vIpD pic.twitter.com/hhF8U6fgGY,,“theres still lot moderate voices party learn lessons 2016 listening people need country” nycmayor bill de blasio says “we could go lot farther lot bolder we’re now”,,252,,65,,1547410938,,2019-01-13 15:22:18
@cnn,,CNN,,New York Mayor Bill de Blasio on if he is considering a 2020 presidential bid: “I never rules things out because you never know what life brings, but I am focused on the work I am doing now.” #CNNSOTUpic.twitter.com/WWxgQLqWLq,,new york mayor bill de blasio considering 2020 presidential bid “i never rules things never know life brings focused work now” cnnsotupictwittercomwwxgqlqwlq,,279,,71,,1547409713,,2019-01-13 15:01:53
@cnn,,CNN,,This vending machine cooks as many as 10 loaves of bread an hour. At least three US grocery chains plan to test it out in stores later this year. https://cnn.it/2SCmY05 pic.twitter.com/Fd1jI9PTF4,,vending machine cooks many 10 loaves bread hour least three us grocery chains plan test stores later year,,287,,96,,1547409660,,2019-01-13 15:01:00
@cnn,,CNN,,“We should have single-payer in this country. We should have Medicare for all, there’s no question … This is the kind of thing Democrats should stand for,” @NYCMayor Bill de Blasio says about the NYC Care program that would provide health coverage for all New Yorkers. #CNNSOTUpic.twitter.com/goqq41Rtnu,,“we singlepayer country medicare all there’s question … kind thing democrats stand for” nycmayor bill de blasio says nyc care program would provide health coverage new yorkers cnnsotupictwittercomgoqq41rtnu,,414,,100,,1547409545,,2019-01-13 14:59:05
@cnn,,CNN,,“Using that act in this instance would be a far larger act than has ever occurred in the past, so I prefer not. Primarily because if we do that, it’s going to go to court and the wall won’t get built,” GOP @SenRonJohnson says on if he supports Trump declaring a national emergencypic.twitter.com/glvfWzBVh4,,“using act instance would far larger act ever occurred past prefer not primarily that it’s going go court wall won’t get built” gop senronjohnson says supports trump declaring national emergencypictwittercomglvfwzbvh4,,167,,72,,1547408926,,2019-01-13 14:48:46
@cnn,,CNN,,“This is not a traditional president. He has unorthodox means but he is President of the United States. It’s pretty much up to him in terms of who he wants to read into his conversations with world leaders,” GOP @SenRonJohnson says. #CNNSOTU https://cnn.it/2D6yZ91 pic.twitter.com/6jMJ7gj5K2,,“this traditional president unorthodox means president united states it’s pretty much terms wants read conversations world leaders” gop senronjohnson says cnnsotu,,289,,118,,1547408331,,2019-01-13 14:38:51
@cnn,,CNN,,This is the new Impossible Burger. Its creators say they have cracked the code to make this vegan burger taste just like the real thing. https://cnn.it/2H3sM1H pic.twitter.com/92KLai2rLl,,new impossible burger creators say cracked code make vegan burger taste like real thing,,424,,162,,1547407860,,2019-01-13 14:31:00
@cnn,,CNN,,“I think history will show that Donald Trump, the supposed great deal maker…business schools and management consultants will look back for years and say this was the most inept negotiation. He boxed himself in a corner,” Democratic Sen. @MarkWarner says of the shutdown. #CNNSOTUpic.twitter.com/II1BUaaV6g,,“i think history show donald trump supposed great deal maker…business schools management consultants look back years say inept negotiation boxed corner” democratic sen markwarner says shutdown cnnsotupictwittercomii1buaav6g,,614,,162,,1547407794,,2019-01-13 14:29:54
@cnn,,CNN,,Dem Sen. @MarkWarner: “I’m for additional border security. But that border security ought to be drive by the experts, not by the political whims of a campaign promise…So more border security? Let’s have at it. But while we are having that debate, let’s reopen the government."pic.twitter.com/38K43TCHhM,,dem sen markwarner “i’m additional border security border security ought drive experts political whims campaign promise…so border security let’s it debate let’s reopen governmentpictwittercom38k43tchhm,,635,,141,,1547407733,,2019-01-13 14:28:53
@cnn,,CNN,,CNN’s @JakeTapper: “Do you think President Trump is, wittingly or unwittingly, an agent of the Russians?”  Democratic Sen. @MarkWarner: “It is a very real question.” #CNNSOTU https://cnn.it/2D6mwC2 pic.twitter.com/BxqTbmloKh,,cnn’s jaketapper “do think president trump is wittingly unwittingly agent russians”  democratic sen markwarner “it real question” cnnsotu,,1976,,567,,1547407413,,2019-01-13 14:23:33
@cnn,,CNN,,Democratic Sen. @MarkWarner says while the Trump administration has imposed sanctions on Russia, they have “been very slow at implementing those sanctions.” #CNNSOTU https://cnn.it/2D4cb9G pic.twitter.com/EAlas8zAES,,democratic sen markwarner says trump administration imposed sanctions russia “been slow implementing sanctions” cnnsotu,,296,,125,,1547407139,,2019-01-13 14:18:59
@cnn,,CNN,,A new CNN poll finds that 56% of Americans oppose a wall along the southern border as the longest shutdown in history remains at an impasse over its funding. https://cnn.it/2D6pExH pic.twitter.com/eIykP6tG3J,,new cnn poll finds 56 americans oppose wall along southern border longest shutdown history remains impasse funding,,579,,196,,1547406967,,2019-01-13 14:16:07
@cnn,,CNN,,CNN’s @jaketapper: “Do you think the President of the United States ever worked on behalf of the Russians?"  Democratic Sen. @MarkWarner: "That’s the defining question of our investigation and the Mueller investigation: Was there collusion?” #CNNSOTU https://cnn.it/2Fvl3a6 pic.twitter.com/dWQZkFUvsI,,cnn’s jaketapper “do think president united states ever worked behalf russians  democratic sen markwarner that’s defining question investigation mueller investigation collusion” cnnsotu,,432,,131,,1547406592,,2019-01-13 14:09:52
@cnn,,CNN,,The world's oceans are warming at an accelerated rate and are much warmer than scientists thought, according to a new studyhttps://cnn.it/2FrS07r ,,worlds oceans warming accelerated rate much warmer scientists thought according new,,3498,,2355,,1547406070,,2019-01-13 14:01:10
@cnn,,CNN,,There are no detailed records of five personal meetings President Donald Trump has had with Russian President Vladimir Putin, The Washington Post reports https://cnn.it/2FseCVo pic.twitter.com/U9DkM0Xzq0,,detailed records five personal meetings president donald trump russian president vladimir putin washington post reports,,2686,,1746,,1547404266,,2019-01-13 13:31:06
@cnn,,CNN,,California Gov. Gavin Newsom’s 2-year-old son stole the show when he decided to crash his dad’s inaugural address, blanket and binky in tow. https://cnn.it/2RkK4fv pic.twitter.com/lSA8emR8QW,,california gov gavin newsom’s 2yearold son stole show decided crash dad’s inaugural address blanket binky tow,,1093,,186,,1547404260,,2019-01-13 13:31:00
@cnn,,CNN,,People over the age of 65 share fake news stories on Facebook more than any other age group, according to a study https://cnn.it/2D8TnWX pic.twitter.com/SjDUQXM4ea,,people age 65 share fake news stories facebook age group according study,,585,,233,,1547402461,,2019-01-13 13:01:01
@cnn,,CNN,,New York's Westchester County Airport is the only airport in the United States to have a curfew -- and locals like it that way https://cnn.it/2Az7jHX pic.twitter.com/Nl5xKjScNl,,new yorks westchester county airport airport united states curfew  locals like way,,112,,37,,1547400660,,2019-01-13 12:31:00
@cnn,,CNN,,Canada wants to welcome more than 1 million new permanent residents in the next three years. That's nearly one percent of the country's population each year https://cnn.it/2D8Pp0v ,,canada wants welcome 1 million new permanent residents next three years thats nearly one percent countrys population year,,1216,,305,,1547398863,,2019-01-13 12:01:03
@cnn,,CNN,,Hyundai has released its concept for a "walking" car that would be able to climb a five-foot wall and step over a five-foot gap https://cnn.it/2RiMDOX pic.twitter.com/tSz9hTZXe7,,hyundai released concept walking car would able climb fivefoot wall step fivefoot gap,,917,,317,,1547397060,,2019-01-13 11:31:00
@cnn,,CNN,,The best passport to hold in 2019 is ... Japan. Again. It retains its top spot as the world's most travel-friendly passport thanks to the document's access to 190 countries. https://cnn.it/2D6nFd1 pic.twitter.com/gXkjH3H4XA,,best passport hold 2019  japan again retains top spot worlds travelfriendly passport thanks documents access 190 countries,,904,,406,,1547395268,,2019-01-13 11:01:08
@cnn,,CNN,,If you're heading to the Maldives for a holiday, there's a strong chance your journey will include a flight on a sea plane. This is what it's like to fly along with the "barefoot pilots" who carry passengers around the popular Indian Ocean destination. https://cnn.it/2Foey8Y pic.twitter.com/52UA4t0QBD,,heading maldives holiday theres strong chance journey include flight sea plane like fly along barefoot pilots carry passengers around popular indian ocean destination,,487,,120,,1547393460,,2019-01-13 10:31:00
@cnn,,CNN,,This pilot photographs storms from the airplane cockpit https://cnn.it/2FsT62I pic.twitter.com/ZBBfsbt9VK,,pilot photographs storms airplane cockpit,,2188,,694,,1547391668,,2019-01-13 10:01:08
@cnn,,CNN,,These gadgets are changing the way moms pump breast milk https://cnn.it/2CeWNFP pic.twitter.com/rjpW6ipKVG,,gadgets changing way moms pump breast milk,,207,,69,,1547389860,,2019-01-13 09:31:00
@cnn,,CNN,,One man had a bomb in the spare tire well of his car when authorities arrested him in 1999. Another was walking along a train track in Vermont with explosives in his bag when police intercepted him in 1987. Both men crossed the US border -- from Canada.https://cnn.it/2Fs073U ,,one man bomb spare tire well car authorities arrested 1999 another walking along train track vermont explosives bag police intercepted 1987 men crossed us border ,,563,,247,,1547388062,,2019-01-13 09:01:02
@cnn,,CNN,,A team of scientists discovered a series of repeating radio waves emanating from billions of light years away https://cnn.it/2AGz01T pic.twitter.com/q4o6ooD5Zr,,team scientists discovered series repeating radio waves emanating billions light years away,,472,,171,,1547386260,,2019-01-13 08:31:00
@cnn,,CNN,,The five most addictive substances in the world:  1. Heroin 2. Cocaine 3. Nicotine 4. Barbiturates ("downers") 5. Alcohol  https://cnn.it/2D8iB81 ,,five addictive substances world  1 heroin 2 cocaine 3 nicotine 4 barbiturates downers 5 alcohol,,3580,,1514,,1547384464,,2019-01-13 08:01:04
@cnn,,CNN,,A little boy accidentally left his teddy bear, Sutro, at a hotel in Hawaii, so staff gave the lost bear and his companion, a stuffed seal named Kauai, the five-star spa treatment https://cnn.it/2CdHYn6 pic.twitter.com/4yB8NilQnp,,little boy accidentally left teddy bear sutro hotel hawaii staff gave lost bear companion stuffed seal named kauai fivestar spa treatment,,919,,179,,1547382660,,2019-01-13 07:31:00
@cnn,,CNN,,Dramatic footage shows a mountainside rescue in the French Alps earlier this month. After a skier was injured on the slopes, a police helicopter flew in to assist. https://cnn.it/2RnJIV2 pic.twitter.com/1Cq4ZqClXB,,dramatic footage shows mountainside rescue french alps earlier month skier injured slopes police helicopter flew assist,,692,,211,,1547380860,,2019-01-13 07:01:00
@cnn,,CNN,,Taco Bell is attempting to reach a broader customer base by testing out an offering of vegetarian menu items https://cnn.it/2AH4N2F pic.twitter.com/SBZIQxOsEL,,taco bell attempting reach broader customer base testing offering vegetarian menu items,,399,,105,,1547379060,,2019-01-13 06:31:00
@cnn,,CNN,,"Oh my God. Oh my God. I'm shaking." This Milwaukee bus driver went above the call of duty when she stopped and ran out to scoop up a baby girl who was wandering barefoot on a freeway overpass in freezing temperatures, and approaching an intersection https://cnn.it/2CbLDBP pic.twitter.com/Wmlmnh13aE,,oh god oh god im shaking milwaukee bus driver went call duty stopped ran scoop baby girl wandering barefoot freeway overpass freezing temperatures approaching intersection,,5947,,1516,,1547377260,,2019-01-13 06:01:00
@cnn,,CNN,,Sun-lovers and fans of Mickey and Minnie flock to Florida year-round, but the Sunshine State has a lot more to offer than Disney World and the beach. https://cnn.it/2RI0uxv pic.twitter.com/j5biJT1JBF,,sunlovers fans mickey minnie flock florida yearround sunshine state lot offer disney world beach,,169,,44,,1547375460,,2019-01-13 05:31:00
@cnn,,CNN,,Lonely George was the last Hawaiian tree snail of his kind. He died, and an entire species has gone extinct https://cnn.it/2D7cH6U pic.twitter.com/OYEtLUSp9r,,lonely george last hawaiian tree snail kind died entire species gone extinct,,647,,336,,1547373663,,2019-01-13 05:01:03
@cnn,,CNN,,The divorce fairness issue that Jeff and MacKenzie Bezos don't have to worry about https://cnn.it/2FuKAQK  (via @CNNOpinion)pic.twitter.com/SQbKzWIv1H,,divorce fairness issue jeff mackenzie bezos worry via cnnopinionpictwittercomsqbkzwiv1h,,150,,38,,1547371808,,2019-01-13 04:30:08
@cnn,,CNN,,Make no mistake — this is a GOP shutdown, writes Julian Zelizer for @CNNOpinion https://cnn.it/2D7S2zH pic.twitter.com/KKoOEpjQBv,,make mistake — gop shutdown writes julian zelizer cnnopinion,,590,,169,,1547370907,,2019-01-13 04:15:07
@cnn,,CNN,,Los Angeles teachers' union says it's ready to strike Monday https://cnn.it/2FtAqje pic.twitter.com/QewTwpaqqx,,los angeles teachers union says ready strike monday,,343,,111,,1547370012,,2019-01-13 04:00:12
@cnn,,CNN,,It was a bittersweet off-season for popular Romanian tennis player and popular world No. 1 Simona Halep https://cnn.it/2Fwe6ps pic.twitter.com/oWUxeMZZnb,,bittersweet offseason popular romanian tennis player popular world no 1 simona halep,,150,,29,,1547369106,,2019-01-13 03:45:06
@cnn,,CNN,,Mother of Navy veteran in Iranian prison says he is not a spy https://cnn.it/2D7hl4I pic.twitter.com/eNluPYVyG4,,mother navy veteran iranian prison says spy,,157,,52,,1547368211,,2019-01-13 03:30:11
@cnn,,CNN,,"Here's why I think a zero tolerance policy on slurs will fail," writes CNN's John Blake. "None of us are innocent. But the way we talk about intolerance on social media doesn't reflect that." https://cnn.it/2D7giBO pic.twitter.com/16m3ZN0zAb,,heres think zero tolerance policy slurs fail writes cnns john blake none us innocent way talk intolerance social media reflect that,,162,,40,,1547367307,,2019-01-13 03:15:07
@cnn,,CNN,,A blindfolded teen crashed into another vehicle while doing the Bird Box challenge in Utah this week, police say. The challenge, in which people move around while wearing blindfolds, originated from the Netflix film "Bird Box." https://cnn.it/2D6ghhw pic.twitter.com/4mdV0Drz0G,,blindfolded teen crashed another vehicle bird box challenge utah week police say challenge people move around wearing blindfolds originated netflix film bird box,,645,,271,,1547366417,,2019-01-13 03:00:17
@cnn,,CNN,,Mother of journalist killed by ISIS concerned about Syria withdrawal https://cnn.it/2D6T8M2 pic.twitter.com/L29TTOJsB2,,mother journalist killed isis concerned syria withdrawal,,241,,89,,1547365505,,2019-01-13 02:45:05
@cnn,,CNN,,After a remarkable comeback that featured two major finals and one epic controversy, can Serena Williams seal her place in the tennis history books once and for all? https://cnn.it/2D5FJDP pic.twitter.com/lZ4JaUG6DP,,remarkable comeback featured two major finals one epic controversy serena williams seal place tennis history books all,,461,,75,,1547364609,,2019-01-13 02:30:09
@cnn,,CNN,,Sen. Elizabeth Warren makes her pitch for radical reform in Washington https://cnn.it/2Fv3maP pic.twitter.com/0AVpOexcW4,,sen elizabeth warren makes pitch radical reform washington,,287,,64,,1547363703,,2019-01-13 02:15:03
@cnn,,CNN,,GoFundMe to refund the $20 million raised for the border wall https://cnn.it/2D5TKBv pic.twitter.com/b5v4wbSVrE,,gofundme refund 20 million raised border wall,,852,,237,,1547362812,,2019-01-13 02:00:12
@cnn,,CNN,,US Secretary of State Mike Pompeo calls the Venezuelan government of President Nicolas Maduro "illegitimate" and says the US will use diplomatic efforts to try to restore democracy in the economically battered nation https://cnn.it/2FtezZg pic.twitter.com/jPzuSPGshs,,us secretary state mike pompeo calls venezuelan government president nicolas maduro illegitimate says us use diplomatic efforts try restore democracy economically battered nation,,309,,129,,1547361904,,2019-01-13 01:45:04
@cnn,,CNN,,Do you remember Christie Brinkley’s Cosmo covers? See the Cosmo effect on #AmericanStyle, Sunday at 9p ET on CNNpic.twitter.com/BJA29MZp8h,,remember christie brinkley’s cosmo covers see cosmo effect americanstyle sunday 9p et cnnpictwittercombja29mzp8h,,240,,56,,1547361023,,2019-01-13 01:30:23
@cnn,,CNN,,Starbucks' new Bali store is designed for tourists https://cnn.it/2D6wuTZ pic.twitter.com/dVDARyRHpH,,starbucks new bali store designed tourists,,252,,71,,1547360107,,2019-01-13 01:15:07
@cnn,,CNN,,A British hacker whose cyberattacks took the nation of Liberia offline is jailed https://cnn.it/2FvlUHG pic.twitter.com/e2VxZsrc2N,,british hacker whose cyberattacks took nation liberia offline jailed,,283,,100,,1547359208,,2019-01-13 01:00:08
@cnn,,CNN,,Why Democrats may go hard left in 2020 https://cnn.it/2D68sbE  | Analysis by Harry Entenpic.twitter.com/FSim3EJf4o,,democrats may go hard left 2020  analysis harry entenpictwittercomfsim3ejf4o,,258,,59,,1547358306,,2019-01-13 00:45:06
@cnn,,CNN,,What warmer oceans mean for the planet https://cnn.it/2FsmGFy pic.twitter.com/kWLntxtI3Y,,warmer oceans mean planet,,287,,148,,1547357406,,2019-01-13 00:30:06
@cnn,,CNN,,Egyptian football player Mo Salah soothes Liverpool nerves in Premier League title race https://cnn.it/2FtcEnv pic.twitter.com/iXyi12EuTp,,egyptian football player mo salah soothes liverpool nerves premier league title race,,224,,35,,1547356506,,2019-01-13 00:15:06
@cnn,,CNN,,As Morocco embraces electric power, Jerome D'Ambrosio wins an unpredictable showcase Marrakesh ePrix https://cnn.it/2D76eJh pic.twitter.com/hVI1n13qVK,,morocco embraces electric power jerome dambrosio wins unpredictable showcase marrakesh eprix,,75,,21,,1547355614,,2019-01-13 00:00:14
@cnn,,CNN,,Former US ambassador to NATO and current president of the Chicago Council on Global Affairs, Ivo Daalder, says the US is "no longer the most important actor" on the world stage https://cnn.it/2FshOAg pic.twitter.com/HZqTaemPtK,,former us ambassador nato current president chicago council global affairs ivo daalder says us no longer important actor world stage,,311,,116,,1547354706,,2019-01-12 23:45:06
@cnn,,CNN,,Congressional Black Caucus calls for removal of GOP Rep. Steve King from committee assignments https://cnn.it/2D5t8k1 pic.twitter.com/N9AkBbwk4C,,congressional black caucus calls removal gop rep steve king committee assignments,,1453,,287,,1547353808,,2019-01-12 23:30:08
@cnn,,CNN,,Rep. Tulsi Gabbard says she will run for president in 2020.  Tune in to "The Van Jones Show" on CNN at 7 p.m. ET to watch the full interview with @VanJones68. https://cnn.it/2FuQ7XG pic.twitter.com/XDvgSbOAT9,,rep tulsi gabbard says run president 2020  tune the van jones show cnn 7 pm et watch full interview vanjones68,,291,,72,,1547352917,,2019-01-12 23:15:17
@cnn,,CNN,,Winter storms are "snow" problem for Kansas City Chiefs fans https://cnn.it/2D5qpqN pic.twitter.com/VTWU8EqHh1,,winter storms snow problem kansas city chiefs fans,,256,,57,,1547352003,,2019-01-12 23:00:03
@cnn,,CNN,,At least 5 killed in Afghanistan attack https://cnn.it/2D6WFtC pic.twitter.com/nvoXoXbQIR,,least 5 killed afghanistan attack,,99,,66,,1547351104,,2019-01-12 22:45:04
@cnn,,CNN,,R. Kelly could face an investigation in Georgia after the airing of a documentary series that chronicled allegations of abuse of young women. Ashton Lattimore writes that the singer's music was more than just a shield for him: It was his source of power. https://cnn.it/2QIKM0x pic.twitter.com/E9YCzpjfUE,,r kelly could face investigation georgia airing documentary series chronicled allegations abuse young women ashton lattimore writes singers music shield him source power,,269,,97,,1547350333,,2019-01-12 22:32:13
@cnn,,CNN,,It may feel like her gaze follows you around the room, but Mona Lisa isn't really looking at you. New research says she's got her attention elsewhere. https://cnn.it/2QMDZTW pic.twitter.com/26f6Bix14O,,may feel like gaze follows around room mona lisa really looking you new research says got attention elsewhere,,250,,88,,1547350269,,2019-01-12 22:31:09
@cnn,,CNN,,Andy Murray's body is giving up on him, forcing the tennis star to retire. Murray will leave behind a legacy not only on the court but off it too as an advocate for women. https://cnn.it/2QGciMk pic.twitter.com/XsBULys4SE,,andy murrays body giving him forcing tennis star retire murray leave behind legacy court advocate women,,195,,51,,1547350242,,2019-01-12 22:30:42
@cnn,,CNN,,Settle in with these weekend reads https://cnn.it/2QIL6fU pic.twitter.com/eGny7B8CJn,,settle weekend reads,,105,,20,,1547350211,,2019-01-12 22:30:11
@cnn,,CNN,,US Secretary of State Mike Pompeo has called his Turkish counterpart to discuss Syria. The conversation comes at a time of increased tensions between the two NATO allies over the planned US withdrawal from Syria. https://cnn.it/2D61p2N pic.twitter.com/LsZhrgCq1i,,us secretary state mike pompeo called turkish counterpart discuss syria conversation comes time increased tensions two nato allies planned us withdrawal syria,,118,,54,,1547349309,,2019-01-12 22:15:09
@cnn,,CNN,,Unpaid airport screening agents to get a day's pay and $500 bonus during shutdown https://cnn.it/2FuLfSn pic.twitter.com/8zbgVNVJYZ,,unpaid airport screening agents get days pay 500 bonus shutdown,,236,,60,,1547347505,,2019-01-12 21:45:05
@cnn,,CNN,,US Secretary of State Mike Pompeo says he'll meet with Saudi Crown Prince Mohammed bin Salman and plans to address the killing of journalist Jamal Khashoggi https://cnn.it/2D5jPk5 pic.twitter.com/L9wGy07z6M,,us secretary state mike pompeo says hell meet saudi crown prince mohammed bin salman plans address killing journalist jamal khashoggi,,227,,85,,1547346607,,2019-01-12 21:30:07
@cnn,,CNN,,"That the GOP turned so quickly on Rep. Steve King is powerful evidence that putting a spotlight on hateful ideas can discredit them. But that media spotlight can also give them oxygen," writes Nicole Hemmer for @CNNOpinion https://cnn.it/2FqQWAJ pic.twitter.com/d8qL1bAqG6,,that gop turned quickly rep steve king powerful evidence putting spotlight hateful ideas discredit them media spotlight also give oxygen writes nicole hemmer cnnopinion,,201,,52,,1547345705,,2019-01-12 21:15:05
@cnn,,CNNnewsroom,,“The potential for somebody to come across and wreak havoc in our country, whether it’s terrorist-related or any other crime, it’s just not worth having a relaxed view on,” Border Patrol agent Chris Cabrera says about the debate over a border wall. https://cnn.it/2M8Ofot pic.twitter.com/bWfd3ndJ3T,,“the potential somebody come across wreak havoc country whether it’s terroristrelated crime it’s worth relaxed view on” border patrol agent chris cabrera says debate border wall,,435,,103,,1547344938,,2019-01-12 21:02:18
@cnn,,CNN,,Bullfighting is latest battleground in Spanish politics https://cnn.it/2D5hVjr pic.twitter.com/t0aM7XKaJW,,bullfighting latest battleground spanish politics,,141,,45,,1547344822,,2019-01-12 21:00:22
@cnn,,CNN,,She’s called the “Notorious RBG” for a reason. If you missed #RBGMovie, here’s your chance to see why fans are inspired and enthralled with Justice Ruth Bader Ginsburg. RBG, a CNN film, Tonight at 8p ETpic.twitter.com/ykeqVXdR9u,,she’s called “notorious rbg” reason missed rbgmovie here’s chance see fans inspired enthralled justice ruth bader ginsburg rbg cnn film tonight 8p etpictwittercomykeqvxdr9u,,720,,152,,1547343905,,2019-01-12 20:45:05
@cnn,,CNN,,Our galaxy is due for a catastrophic collision, study says https://cnn.it/2D6AaFq pic.twitter.com/p7oZPzeEEL,,galaxy due catastrophic collision study says,,471,,181,,1547343008,,2019-01-12 20:30:08
@cnn,,CNNnewsroom,,“The hell with the wall for right now.” A Texas sheriff who supports President Trump tells @GaryTuchmanCNN that money for border security should be spent on more law enforcement and technology, not a wall. https://cnn.it/2M72cn4 pic.twitter.com/naCogaq1AB,,“the hell wall right now” texas sheriff supports president trump tells garytuchmancnn money border security spent law enforcement technology wall,,1945,,632,,1547342863,,2019-01-12 20:27:43
@cnn,,CNN,,Your questions about the federal government shutdown — answered https://cnn.it/2FxAEFY pic.twitter.com/RWuXBtOskz,,questions federal government shutdown — answered,,126,,47,,1547342109,,2019-01-12 20:15:09
@cnn,,CNN,,.@drsanjaygupta goes inside the minds of multiples, speaking with twin astronauts Mark and Scott Kelly about what it’s like to be a twin in the latest episode of @CNNFilms' #ThreeIdenticalStrangers podcast: https://cnn.it/2D6pUx2 pic.twitter.com/Ql8PDjLMLU,,drsanjaygupta goes inside minds multiples speaking twin astronauts mark scott kelly it’s like twin latest episode cnnfilms threeidenticalstrangers,,109,,25,,1547341218,,2019-01-12 20:00:18
@cnn,,CNN,,Rep. Tulsi Gabbard says she will run for president in 2020.  Tune in to "The Van Jones Show" on CNN at 7 p.m. ET to watch the full interview with @VanJones68. https://cnn.it/2D5aLf3 pic.twitter.com/Wia5ymzuQ5,,rep tulsi gabbard says run president 2020  tune the van jones show cnn 7 pm et watch full interview vanjones68,,981,,235,,1547340321,,2019-01-12 19:45:21
@cnn,,CNN,,Post-truth politics is alive and well in Brexit Britain https://cnn.it/2FqWZoS  | Analysis by Luke McGeepic.twitter.com/ZvCk5zqbVa,,posttruth politics alive well brexit britain  analysis luke mcgeepictwittercomzvck5zqbva,,76,,29,,1547339403,,2019-01-12 19:30:03
@cnn,,CNN,,The Brexit questions that make your head spin https://cnn.it/2D4FaKG pic.twitter.com/pOZjqMSkeF,,brexit questions make head spin,,79,,28,,1547338507,,2019-01-12 19:15:07
@cnn,,CNN,,Woman accused of skipping manicure bill and running over owner is arrested https://cnn.it/2D5r2kd pic.twitter.com/2vyYMOGrUx,,woman accused skipping manicure bill running owner arrested,,406,,103,,1547337611,,2019-01-12 19:00:11
@cnn,,CNN,,Congo presidential runner-up asks court to order election recount https://cnn.it/2D7gEsl pic.twitter.com/rUlRxHjkN9,,congo presidential runnerup asks court order election recount,,107,,33,,1547336705,,2019-01-12 18:45:05
@cnn,,CNN,,Snowstorm pounding St. Louis has Washington, DC, and Baltimore in its sights https://cnn.it/2D7eYix pic.twitter.com/f2QZfnimyg,,snowstorm pounding st louis washington dc baltimore sights,,140,,60,,1547335805,,2019-01-12 18:30:05
@cnn,,CNN,,“We’re going to make sure that the promise of America is available to everyone in this 21st century." Former secretary of Housing and Urban Development Julián Castro, a Democrat, announces his 2020 presidential bid in San Antonio, where he served as mayor. https://cnn.it/2VH32LA pic.twitter.com/yY4khcWkkg,,“we’re going make sure promise america available everyone 21st century former secretary housing urban development julián castro democrat announces 2020 presidential bid san antonio served mayor,,1900,,622,,1547335200,,2019-01-12 18:20:00
@cnn,,CNN,,How a hacked phone may have led killers to Saudi journalist Jamal Khashoggi https://cnn.it/2D5nOND pic.twitter.com/oBj5Cp9iRn,,hacked phone may led killers saudi journalist jamal khashoggi,,176,,97,,1547334909,,2019-01-12 18:15:09
@cnn,,CNN,,BREAKING: Former secretary of Housing and Urban Development Julián Castro, a Democrat, says he's running for president in 2020 https://cnn.it/2FxZmq7 pic.twitter.com/71PWLevcZ9,,breaking former secretary housing urban development julián castro democrat says hes running president 2020,,1050,,323,,1547334357,,2019-01-12 18:05:57
@cnn,,CNN,,Police fired water cannon and tear gas at "gilets jaunes" or yellow vest protesters in central Paris, who've marched through the city for the ninth consecutive weekend https://cnn.it/2D5M6at pic.twitter.com/4Nonjscz2D,,police fired water cannon tear gas gilets jaunes yellow vest protesters central paris whove marched city ninth consecutive weekend,,153,,71,,1547334017,,2019-01-12 18:00:17
@cnn,,CNNnewsroom,,The abduction of 13-year-old Jayme Closs was “a random act,” Wisconsin sheriff tells @JeanCasarezCNN. https://cnn.it/2Fot6q4 pic.twitter.com/NedxCDoDOr,,abduction 13yearold jayme closs “a random act” wisconsin sheriff tells jeancasarezcnn,,155,,59,,1547333064,,2019-01-12 17:44:24
@cnn,,CNN,,German WWI U-boat now visible from shore in France https://cnn.it/2FxjOXM pic.twitter.com/1EdAYoVEBn,,german wwi uboat visible shore france,,347,,109,,1547333107,,2019-01-12 17:45:07
@cnn,,CNN,,Democratic Rep. Alexandria Ocasio-Cortez's campaign fined by New York for not having workers' compensation coverage for a month https://cnn.it/2FqCEQm pic.twitter.com/HbzhcmPLPA,,democratic rep alexandria ocasiocortezs campaign fined new york workers compensation coverage month,,288,,95,,1547332215,,2019-01-12 17:30:15
@cnn,,CNNnewsroom,,“The President's tweet couldn't have been scripted better if written by Putin himself.” @sam_vinograd says Pres. Trump’s response to report that FBI investigated how his actions seemed to benefit Russia, according to a source, “undercuts his own defense.” https://cnn.it/2Fp7r0G pic.twitter.com/Nsj7PMDR62,,“the presidents tweet couldnt have scripted better if written putin himself” samvinograd says pres trump’s response report fbi investigated actions seemed benefit russia according source “undercuts defense”,,742,,262,,1547328604,,2019-01-12 16:30:04
@cnn,,CNN,,Brexit could kill a global sports success story, writes Andrés Martinez for @CNNOpinion https://cnn.it/2Fxghsu pic.twitter.com/7MdDDDNX13,,brexit could kill global sports success story writes andrés martinez cnnopinion,,173,,50,,1547331306,,2019-01-12 17:15:06
@cnn,,CNN,,A Saudi teen who fled to Thailand to escape her allegedly abusive family has arrived in Canada after being offered asylum there https://cnn.it/2FulDoI pic.twitter.com/SkSHOencCw,,saudi teen fled thailand escape allegedly abusive family arrived canada offered asylum,,1632,,270,,1547330413,,2019-01-12 17:00:13
@cnn,,CNN,,How testimony from Trump's former personal lawyer Michael Cohen could complicate life for the President https://cnn.it/2D7tln7  (via @CNNOpinion)pic.twitter.com/KoeGtfRccG,,testimony trumps former personal lawyer michael cohen could complicate life president via cnnopinionpictwittercomkoegtfrccg,,421,,100,,1547329507,,2019-01-12 16:45:07
@cnn,,CNN,,Dwayne Johnson has slammed a British tabloid for publishing what he calls a "100% fabricated" interview that quotes the American actor criticizing millennials and "smacking down snowflakes" https://cnn.it/2D4joXh pic.twitter.com/kuDOjNffMv,,dwayne johnson slammed british tabloid publishing calls 100 fabricated interview quotes american actor criticizing millennials smacking snowflakes,,568,,140,,1547328605,,2019-01-12 16:30:05
@cnn,,CNN,,It takes seconds to suss out offensive tweets, but celebs just aren't getting the message https://cnn.it/2D7pgiN pic.twitter.com/zQ2mn54HyZ,,takes seconds suss offensive tweets celebs getting message,,106,,42,,1547327704,,2019-01-12 16:15:04
@cnn,,CNN,,Netflix has people (serenely) bulldozing their closets, and thrift stores are riding the wave https://cnn.it/2FswZt7 pic.twitter.com/sh69Oo8c0m,,netflix people serenely bulldozing closets thrift stores riding wave,,409,,94,,1547326804,,2019-01-12 16:00:04
@cnn,,CNN,,Record government shutdown is a massive Washington failure https://cnn.it/2D4XweH  | Analysis by Stephen Collinsonpic.twitter.com/FcmN22FPF1,,record government shutdown massive washington failure  analysis stephen collinsonpictwittercomfcmn22fpf1,,349,,105,,1547325907,,2019-01-12 15:45:07
@cnn,,CNN,,Why retailers are fleeing Fifth Avenue https://cnn.it/2FuetAQ pic.twitter.com/m13ERsjQiw,,retailers fleeing fifth avenue,,142,,63,,1547325065,,2019-01-12 15:31:05
@cnn,,CNNnewsroom,,What should happen to the Las Vegas shooter’s guns?  Alice Denton, attorney for the special administrator appointed to determine the shooter’s estate, joins @smerconish to discuss whether they should be destroyed or sold. https://cnn.it/2Cka3Jx pic.twitter.com/nbG76BpzU1,,happen las vegas shooter’s guns  alice denton attorney special administrator appointed determine shooter’s estate joins smerconish discuss whether destroyed sold,,138,,42,,1547324069,,2019-01-12 15:14:29
@cnn,,CNNnewsroom,,At the same time the FBI opened probe into Pres. Trump after he fired FBI Dir. Comey, counterintelligence agents investigated why Trump was acting in ways that seemed to benefit Russia, source says.   @eliehonig discusses the biggest question remaining. https://cnn.it/2FsUfHx pic.twitter.com/bxiJAuhisP,,time fbi opened probe pres trump fired fbi dir comey counterintelligence agents investigated trump acting ways seemed benefit russia source says   eliehonig discusses biggest question remaining,,345,,129,,1547322367,,2019-01-12 14:46:07
@cnn,,CNNnewsroom,,“Why shouldn't Justice Ginsburg be able to watch the arguments given her own absence?”   @smerconish says cameras should be allowed in the Supreme Court — and why he thinks Ruth Bader Ginsburg would agree with him. https://cnn.it/2H8bSPf pic.twitter.com/WmJDwmzIcJ,,“why justice ginsburg be able watch arguments given absence”   smerconish says cameras allowed supreme court — thinks ruth bader ginsburg would agree him,,294,,61,,1547320519,,2019-01-12 14:15:19
@cnn,,CNN,,At least three people, including two firefighters, have died and dozens more have been injured after a gas leak caused an explosion in Paris, emergency services in the French capital say https://cnn.it/2D2QbMo pic.twitter.com/54rxvthJbO,,least three people including two firefighters died dozens injured gas leak caused explosion paris emergency services french capital say,,304,,173,,1547324107,,2019-01-12 15:15:07
@cnn,,CNN,,Lonely George was the last Hawaiian tree snail of his kind. He died, and an entire species has gone extinct https://cnn.it/2FxJeVB pic.twitter.com/lvBG3cE0qU,,lonely george last hawaiian tree snail kind died entire species gone extinct,,486,,230,,1547323267,,2019-01-12 15:01:07
@cnn,,CNN,,When the FBI opened a probe into Pres. Trump after he fired FBI Dir. Comey, counterintelligence agents investigated why Trump was acting in ways that seemed to benefit Russia, source says.   A fmr. federal prosecutor discusses with CNN's Michael Smerconish http://cnn.it/2FsUfHx pic.twitter.com/C9nWLjNGTr,,fbi opened probe pres trump fired fbi dir comey counterintelligence agents investigated trump acting ways seemed benefit russia source says   fmr federal prosecutor discusses cnns michael smerconish,,960,,348,,1547322907,,2019-01-12 14:55:07
@cnn,,CNN,,The partial government shutdown entered its 22nd day today, breaking the record to become the longest government shutdown in US history.https://cnn.it/2D5Al3H ,,partial government shutdown entered 22nd day today breaking record become longest government shutdown us,,411,,195,,1547322244,,2019-01-12 14:44:04
@cnn,,CNN,,New York's Westchester County Airport is the only airport in the United States to have a curfew -- and locals like it that way https://cnn.it/2Az7jHX pic.twitter.com/k5zQb7eDb9,,new yorks westchester county airport airport united states curfew  locals like way,,124,,34,,1547321460,,2019-01-12 14:31:00
@cnn,,CNN,,The man accused of kidnapping 13-year-old Jayme Closs and killing her parents shaved his head to avoid leaving any DNA evidence, police say. https://cnn.it/2D4NR7z pic.twitter.com/LOVyjBldY6,,man accused kidnapping 13yearold jayme closs killing parents shaved head avoid leaving dna evidence police say,,282,,89,,1547320564,,2019-01-12 14:16:04
@cnn,,CNN,,This vending machine cooks as many as 10 loaves of bread an hour. At least three US grocery chains plan to test it out in stores later this year. https://cnn.it/2SCmY05 pic.twitter.com/5RRll0fLGE,,vending machine cooks many 10 loaves bread hour least three us grocery chains plan test stores later year,,370,,117,,1547319660,,2019-01-12 14:01:00
@cnn,,CNN,,Former Housing and Urban Development Secretary Julián Castro expected to announce presidential bid https://cnn.it/2FtzrQg pic.twitter.com/8ZaGwuUQJu,,former housing urban development secretary julián castro expected announce presidential bid,,494,,140,,1547318643,,2019-01-12 13:44:03
@cnn,,CNN,,Hyundai has released its concept for a "walking" car that would be able to climb a five-foot wall and step over a five-foot gap https://cnn.it/2RiMDOX pic.twitter.com/AlE4RVk07j,,hyundai released concept walking car would able climb fivefoot wall step fivefoot gap,,1088,,366,,1547317860,,2019-01-12 13:31:00
@cnn,,CNN,,Two killed, dozens injured after gas leak causes explosion in Paris, officials say https://cnn.it/2D4kmTE pic.twitter.com/wM0fPOQO7B,,two killed dozens injured gas leak causes explosion paris officials say,,222,,130,,1547317203,,2019-01-12 13:20:03
@cnn,,CNN,,People over the age of 65 share fake news stories on Facebook more than any other age group, according to a study https://cnn.it/2FulyRC pic.twitter.com/WPtl2uqFBY,,people age 65 share fake news stories facebook age group according study,,719,,319,,1547316066,,2019-01-12 13:01:06
@cnn,,CNN,,This is the new Impossible Burger. Its creators say they have cracked the code to make this vegan burger taste just like the real thing. https://cnn.it/2H3sM1H pic.twitter.com/FpNYeBYybe,,new impossible burger creators say cracked code make vegan burger taste like real thing,,523,,146,,1547314260,,2019-01-12 12:31:00
@cnn,,CNN,,The world's oceans are warming at an accelerated rate and are much warmer than scientists thought, according to a new studyhttps://cnn.it/2FtqYMY ,,worlds oceans warming accelerated rate much warmer scientists thought according new,,408,,272,,1547312462,,2019-01-12 12:01:02
@cnn,,CNN,,If you're heading to the Maldives for a holiday, there's a strong chance your journey will include a flight on a sea plane. This is what it's like to fly along with the "barefoot pilots" who carry passengers around the popular Indian Ocean destination. https://cnn.it/2Foey8Y pic.twitter.com/MFxOvCKxvP,,heading maldives holiday theres strong chance journey include flight sea plane like fly along barefoot pilots carry passengers around popular indian ocean destination,,577,,149,,1547310660,,2019-01-12 11:31:00
@cnn,,CNN,,Canada wants to welcome more than 1 million new permanent residents in the next three years. That's nearly one percent of the country's population each year https://cnn.it/2D7gP6X ,,canada wants welcome 1 million new permanent residents next three years thats nearly one percent countrys population year,,939,,216,,1547308863,,2019-01-12 11:01:03
@cnn,,CNN,,These gadgets are changing the way moms pump breast milk https://cnn.it/2CeWNFP pic.twitter.com/ATR4fixsMF,,gadgets changing way moms pump breast milk,,190,,72,,1547307060,,2019-01-12 10:31:00
@cnn,,CNN,,The best passport to hold in 2019 is ... Japan. Again. It retains its top spot as the world's most travel-friendly passport thanks to the document's access to 190 countries. https://cnn.it/2FtgTzC pic.twitter.com/2xMs60GA5H,,best passport hold 2019  japan again retains top spot worlds travelfriendly passport thanks documents access 190 countries,,826,,385,,1547305266,,2019-01-12 10:01:06
@cnn,,CNN,,A team of scientists discovered a series of repeating radio waves emanating from billions of light years away https://cnn.it/2AGz01T pic.twitter.com/B4K91bxiPm,,team scientists discovered series repeating radio waves emanating billions light years away,,433,,146,,1547303460,,2019-01-12 09:31:00
@cnn,,CNN,,This pilot photographs storms from the airplane cockpit https://cnn.it/2D6Hu3P pic.twitter.com/efdNr1khKZ,,pilot photographs storms airplane cockpit,,2630,,795,,1547301671,,2019-01-12 09:01:11
@cnn,,CNN,,Hawaii has a new black sand beach formed by the devastating eruption of Kilauea Volcano last year https://cnn.it/2D78zUv pic.twitter.com/PBMVppYyj6,,hawaii new black sand beach formed devastating eruption kilauea volcano last year,,505,,138,,1547300766,,2019-01-12 08:46:06
@cnn,,CNN,,Sun-lovers and fans of Mickey and Minnie flock to Florida year-round, but the Sunshine State has a lot more to offer than Disney World and the beach. https://cnn.it/2RI0uxv pic.twitter.com/9YNOtYhibi,,sunlovers fans mickey minnie flock florida yearround sunshine state lot offer disney world beach,,123,,30,,1547299860,,2019-01-12 08:31:00
@cnn,,CNN,,Months after she went missing when her parents were killed, Jayme Closs was back in her hometown Friday after escaping her abductor and getting neighbors to call 911, a Wisconsin sheriff saidhttps://cnn.it/2D75p35 ,,months went missing parents killed jayme closs back hometown friday escaping abductor getting neighbors call 911 wisconsin sheriff,,460,,111,,1547298962,,2019-01-12 08:16:02
@cnn,,CNN,,One man had a bomb in the spare tire well of his car when authorities arrested him in 1999. Another was walking along a train track in Vermont with explosives in his bag when police intercepted him in 1987. Both men crossed the US border -- from Canada.https://cnn.it/2FsR4PZ ,,one man bomb spare tire well car authorities arrested 1999 another walking along train track vermont explosives bag police intercepted 1987 men crossed us border ,,699,,317,,1547298063,,2019-01-12 08:01:03
@cnn,,CNN,,"We had no idea this patient was pregnant," a nurse told a dispatcher during a frantic 911 call made after a woman who has been in a vegetative state for years gave birth at an Arizona care facility last month https://cnn.it/2D59l4t pic.twitter.com/9cnACV1IFe,,we idea patient pregnant nurse told dispatcher frantic 911 call made woman vegetative state years gave birth arizona care facility last month,,138,,79,,1547297166,,2019-01-12 07:46:06
@cnn,,CNN,,California Gov. Gavin Newsom’s 2-year-old son stole the show when he decided to crash his dad’s inaugural address, blanket and binky in tow. https://cnn.it/2RkK4fv pic.twitter.com/x9Q0lJ2N7I,,california gov gavin newsom’s 2yearold son stole show decided crash dad’s inaugural address blanket binky tow,,966,,186,,1547296260,,2019-01-12 07:31:00
@cnn,,CNN,,The medieval era "required leaders who were flexible, intelligent and able to understand the complexities of their world...The wall won't work - not because it's a throwback to imagined medieval barbarism, but because it's a con." -David Perry, @CNNOpinionhttps://cnn.it/2FrORV3 ,,medieval era required leaders flexible intelligent able understand complexities worldthe wall work  throwback imagined medieval barbarism con david perry,,640,,197,,1547295364,,2019-01-12 07:16:04
@cnn,,CNN,,The five most addictive substances in the world:  1. Heroin 2. Cocaine 3. Nicotine 4. Barbiturates ("downers") 5. Alcohol  https://cnn.it/2D5BdFw ,,five addictive substances world  1 heroin 2 cocaine 3 nicotine 4 barbiturates downers 5 alcohol,,5896,,2494,,1547294463,,2019-01-12 07:01:03
@cnn,,CNN,,Astronomers believe that a recently discovered super-Earth, only six light-years away, might be able to support life https://cnn.it/2D6xs2F pic.twitter.com/zSlGzfx5st,,astronomers believe recently discovered superearth six lightyears away might able support life,,758,,209,,1547293566,,2019-01-12 06:46:06
@cnn,,CNN,,A little boy accidentally left his teddy bear, Sutro, at a hotel in Hawaii, so staff gave the lost bear and his companion, a stuffed seal named Kauai, the five-star spa treatment https://cnn.it/2CdHYn6 pic.twitter.com/Gg7JHtwR38,,little boy accidentally left teddy bear sutro hotel hawaii staff gave lost bear companion stuffed seal named kauai fivestar spa treatment,,1479,,402,,1547292660,,2019-01-12 06:31:00
@cnn,,CNN,,If you want to lose weight, this is why diet is far more important than exercise -- by a long shot https://cnn.it/2RpJT1F pic.twitter.com/EBCYssqdLh,,want lose weight diet far important exercise  long shot,,619,,245,,1547291760,,2019-01-12 06:16:00
@cnn,,CNN,,Dramatic footage shows a mountainside rescue in the French Alps earlier this month. After a skier was injured on the slopes, a police helicopter flew in to assist. https://cnn.it/2RnJIV2 pic.twitter.com/BeXi0sYz4q,,dramatic footage shows mountainside rescue french alps earlier month skier injured slopes police helicopter flew assist,,577,,169,,1547290860,,2019-01-12 06:01:00
@cnn,,CNN,,Taco Bell is attempting to reach a broader customer base by testing out an offering of vegetarian menu items https://cnn.it/2AH4N2F pic.twitter.com/nWjTwTZh0Z,,taco bell attempting reach broader customer base testing offering vegetarian menu items,,334,,63,,1547289060,,2019-01-12 05:31:00
@cnn,,CNN,,Denver could become the first US city to decriminalize magic mushrooms https://cnn.it/2D6rL4N pic.twitter.com/EenNvYhy9l,,denver could become first us city decriminalize magic mushrooms,,667,,160,,1547288164,,2019-01-12 05:16:04
@cnn,,CNN,,BREAKING: The partial government shutdown entered its 22nd day on Saturday, breaking the record to become the longest government shutdown in US history https://cnn.it/2D4rHCt pic.twitter.com/pDECfkJW8d,,breaking partial government shutdown entered 22nd day saturday breaking record become longest government shutdown us history,,344,,179,,1547287930,,2019-01-12 05:12:10
@cnn,,CNN,,"Oh my God. Oh my God. I'm shaking." This Milwaukee bus driver went above the call of duty when she stopped and ran out to scoop up a baby girl who was wandering barefoot on a freeway overpass in freezing temperatures, and approaching an intersection https://cnn.it/2CbLDBP pic.twitter.com/CwRULetnhl,,oh god oh god im shaking milwaukee bus driver went call duty stopped ran scoop baby girl wandering barefoot freeway overpass freezing temperatures approaching intersection,,7180,,2360,,1547287260,,2019-01-12 05:01:00
@cnn,,CNN,,Lonely George was the last Hawaiian tree snail of his kind. He died, and an entire species has gone extinct https://cnn.it/2Ft5yiW pic.twitter.com/RJk1tjlnPD,,lonely george last hawaiian tree snail kind died entire species gone extinct,,493,,288,,1547286368,,2019-01-12 04:46:08
@cnn,,CNN,,People over the age of 65 share fake news stories on Facebook more than any other age group, according to a study https://cnn.it/2D4YKX7 pic.twitter.com/gORKlVwWqP,,people age 65 share fake news stories facebook age group according study,,710,,295,,1547285468,,2019-01-12 04:31:08
@cnn,,CNN,,National park visitors cut down protected Joshua trees during the partial government shutdown https://cnn.it/2FpY3JI pic.twitter.com/o1sGoGs7qa,,national park visitors cut protected joshua trees partial government shutdown,,213,,155,,1547285053,,2019-01-12 04:24:13
@cnn,,CNN,,About 30 furloughed federal employees were accidentally paid in an apparent glitch before the funds were recovered, The Washington Post reportedhttps://cnn.it/2D5WDT1 ,,30 furloughed federal employees accidentally paid apparent glitch funds recovered washington post,,270,,121,,1547284563,,2019-01-12 04:16:03
@cnn,,CNNTonight,,CNN's @DonLemon talks with New York Times reporter Adam Goldman about the FBI investigation into whether President Trump was secretly working on the behalf of Russia. https://cnn.it/2VM6xAD pic.twitter.com/Zc5utTsKEm,,cnns donlemon talks new york times reporter adam goldman fbi investigation whether president trump secretly working behalf russia,,761,,271,,1547283084,,2019-01-12 03:51:24
@cnn,,CuomoPrimeTime,,Former White House communications director Anthony Scaramucci says President Trump "probably has a discretionary authority" to divert funds from disaster aid to build his border wall but he "would caution him not to do it" https://cnn.it/2VEWNrE pic.twitter.com/Jo3KQfZHQj,,former white house communications director anthony scaramucci says president trump probably discretionary authority divert funds disaster aid build border wall would caution it,,812,,195,,1547280674,,2019-01-12 03:11:14
@cnn,,CNN,,A news helicopter happened across an epic game of Mario Kart being played on the big screen at the Kansas City Royals' Kauffman Stadium https://cnn.it/2SSmkfq pic.twitter.com/l2nxSuJj01,,news helicopter happened across epic game mario kart played big screen kansas city royals kauffman stadium,,502,,116,,1547283661,,2019-01-12 04:01:01
@cnn,,CNN,,At the same time the FBI opened a probe into President Trump for possible obstruction of justice after he fired FBI Dir. James Comey, counterintelligence agents were investigating why Trump was acting in ways that seemed to benefit Russia, a source sayshttps://cnn.it/2Fw7nfb ,,time fbi opened probe president trump possible obstruction justice fired fbi dir james comey counterintelligence agents investigating trump acting ways seemed benefit russia source,,1693,,583,,1547282884,,2019-01-12 03:48:04
@cnn,,CNN,,This is the new Impossible Burger. Its creators say they have cracked the code to make this vegan burger taste just like the real thing. https://cnn.it/2H3sM1H pic.twitter.com/GXL9pGKR0U,,new impossible burger creators say cracked code make vegan burger taste like real thing,,375,,94,,1547282760,,2019-01-12 03:46:00
@cnn,,CNN,,Florida Gov. Ron DeSantis issued full posthumous pardons to four men nearly 70 years after they were wrongly accused of raping a 17-year-old girlhttps://cnn.it/2FwhT5M ,,florida gov ron desantis issued full posthumous pardons four men nearly 70 years wrongly accused raping 17yearold,,1086,,321,,1547281864,,2019-01-12 03:31:04
@cnn,,CuomoPrimeTime,,Former White House communications director Anthony Scaramucci tells CNN's @ChrisCuomo that "whatever's in the [Mueller] report, we have to accept and we have to have open access to it" https://cnn.it/2FnO4EK pic.twitter.com/Fhqkvaqrt6,,former white house communications director anthony scaramucci tells cnns chriscuomo whatevers mueller report accept open access it,,905,,173,,1547279807,,2019-01-12 02:56:47
@cnn,,CNN,,Hyundai has released its concept for a "walking" car that would be able to climb a five-foot wall and step over a five-foot gap https://cnn.it/2RiMDOX pic.twitter.com/nQ0C1de9pw,,hyundai released concept walking car would able climb fivefoot wall step fivefoot gap,,503,,204,,1547281260,,2019-01-12 03:21:00
@cnn,,CuomoPrimeTime,,"Transparency is going to have to be paramount," says @ChrisCuomo about the Mueller report. "If you don't let the American people see as much as you possibly can, you will never get the clearance that the President wants at the end of this. ... People will always be suspicious."pic.twitter.com/1gxv29uHto,,transparency going paramount says chriscuomo mueller report if let american people see much possibly can never get clearance president wants end this  people always suspiciouspictwittercom1gxv29uhto,,1889,,404,,1547278507,,2019-01-12 02:35:07
@cnn,,CNN,,The wife of a federal worker put out of work by the government shutdown picked up a $100,000 check and a brand-new SUV on Friday after winning a Virginia lottery game, the state lottery reported https://cnn.it/2FtmaHt pic.twitter.com/JRlDc6HuLc,,wife federal worker put work government shutdown picked 100000 check brandnew suv friday winning virginia lottery game state lottery reported,,919,,115,,1547280966,,2019-01-12 03:16:06
@cnn,,CNN,,If you're heading to the Maldives for a holiday, there's a strong chance your journey will include a flight on a sea plane. This is what it's like to fly along with the "barefoot pilots" who carry passengers around the popular Indian Ocean destination. https://cnn.it/2Foey8Y pic.twitter.com/W6KZvGzbFV,,heading maldives holiday theres strong chance journey include flight sea plane like fly along barefoot pilots carry passengers around popular indian ocean destination,,434,,155,,1547280679,,2019-01-12 03:11:19
@cnn,,CNN,,A team of scientists discovered a series of repeating radio waves emanating from billions of light years away https://cnn.it/2AGz01T pic.twitter.com/Y0XPAF8BkX,,team scientists discovered series repeating radio waves emanating billions light years away,,349,,120,,1547280584,,2019-01-12 03:09:44
@cnn,,CNN,,Sun-lovers and fans of Mickey and Minnie flock to Florida year-round, but the Sunshine State has a lot more to offer than Disney World and the beach. https://cnn.it/2RI0uxv pic.twitter.com/eVORoqX0r8,,sunlovers fans mickey minnie flock florida yearround sunshine state lot offer disney world beach,,102,,36,,1547280256,,2019-01-12 03:04:16
@cnn,,CNN,,A doctor who gave a yearly checkup to a woman in a vegetative state about 37 weeks before she gave birth wrote that there were no major changes in her health, according to medical records sent to an Arizona court https://cnn.it/2FsTy0S pic.twitter.com/RwClkfbzcu,,doctor gave yearly checkup woman vegetative state 37 weeks gave birth wrote major changes health according medical records sent arizona court,,135,,74,,1547280166,,2019-01-12 03:02:46
@cnn,,CNN,,Former New York City Mayor Michael Bloomberg, who is weighing a 2020 presidential bid, blamed President Trump for the government shutdown, calling it a failure of "presidential leadership" https://cnn.it/2D3BicS pic.twitter.com/S2trZCfk5O,,former new york city mayor michael bloomberg weighing 2020 presidential bid blamed president trump government shutdown calling failure presidential leadership,,506,,114,,1547280065,,2019-01-12 03:01:05
@cnn,,CNN,,A growing number of women in South Korea are challenging attitudes toward beauty as part of a feminist movement known as "escape the corset"https://cnn.it/2FsM1iH ,,growing number women south korea challenging attitudes toward beauty part feminist movement known escape,,431,,139,,1547279465,,2019-01-12 02:51:05
@cnn,,CNN,,Here's a look at one of the most transformative years of Bob Dylan’s career, in photos https://cnn.it/2FpygkR pic.twitter.com/OAj823ONKC,,heres look one transformative years bob dylan’s career photos,,213,,72,,1547278865,,2019-01-12 02:41:05
@cnn,,CNN,,Two years after she signed with the network amid much fanfare, Megyn Kelly and NBC have officially parted ways https://cnn.it/2D5oTFm pic.twitter.com/caJAVzHqn7,,two years signed network amid much fanfare megyn kelly nbc officially parted ways,,413,,94,,1547278468,,2019-01-12 02:34:28
@cnn,,AC360,,"This is a guy that has five different opinions from morning until the next day ... he's not at all consistent."  @RepGaramendi says his concerns are "not at all" eased by Trump announcing he'd "rather not" declare a national emergency over immigration.  https://cnn.it/2QGDGdg pic.twitter.com/fshBr8EaMc,,this guy five different opinions morning next day  hes consistent  repgaramendi says concerns not all eased trump announcing hed rather not declare national emergency immigration,,318,,83,,1547277728,,2019-01-12 02:22:08
@cnn,,CNN,,Trust in the government is extremely low, polls show. The shutdown probably won't help. https://cnn.it/2FpQyCy pic.twitter.com/dE7GqSQSMp,,trust government extremely low polls show shutdown probably help,,191,,65,,1547278267,,2019-01-12 02:31:07
@cnn,,CNN,,Missing Wisconsin teenager Jayme Closs was found alive 87 days after her parents were shot to death in their family home. Barron County Sheriff Chris Fitzgerald joined Full Circle to discuss the investigation. https://cnn.it/2FwNvIT pic.twitter.com/1aLqI0vewx,,missing wisconsin teenager jayme closs found alive 87 days parents shot death family home barron county sheriff chris fitzgerald joined full circle discuss investigation,,259,,49,,1547277665,,2019-01-12 02:21:05
@cnn,,CNN,,All minors at a massive tent camp for migrant children in Tornillo, Texas, have been placed with vetted sponsors, an official with the contractor that operates the facility for the Department of Health and Human Services saidhttps://cnn.it/2D3ocMz ,,minors massive tent camp migrant children tornillo texas placed vetted sponsors official contractor operates facility department health human services,,267,,98,,1547277451,,2019-01-12 02:17:31
@cnn,,CNN,,What is "it" and does Kamala Harris have it? | Analysis by CNN's Nia-Malika Henderson https://cnn.it/2Fpvyvs pic.twitter.com/LUmy9tPyci,,it kamala harris it  analysis cnns niamalika henderson,,526,,87,,1547277004,,2019-01-12 02:10:04
@cnn,,AC360,,"He actually said that yesterday: 'the buck stops with everybody.'"  @JohnBerman is #KeepingThemHonest as he quotes Trump on the government shutdown, adding "in fact today the buck truly stopped, as in the dollars dried up, for 800,000 federal workers."  https://cnn.it/2QG73fy pic.twitter.com/Ng9IXWcH9n,,he actually said yesterday the buck stops everybody  johnberman keepingthemhonest quotes trump government shutdown adding in fact today buck truly stopped dollars dried up 800000 federal workers,,498,,162,,1547275998,,2019-01-12 01:53:18
@cnn,,CNN,,The gadgets of the future know everything wrong with you right now https://cnn.it/2Fs5foz pic.twitter.com/LJkymmK8Dc,,gadgets future know everything wrong right,,83,,34,,1547276466,,2019-01-12 02:01:06
@cnn,,CNNPhotos,,It was one of the most transformative years of Bob Dylan’s career, and photographer Daniel Kramer was along for the ride: https://cnn.it/2THHQDl pic.twitter.com/J1UUL0vklY,,one transformative years bob dylan’s career photographer daniel kramer along ride,,219,,70,,1547266260,,2019-01-11 23:11:00
@cnn,,CNN,,Former New York Mayor Michael Bloomberg would self-fund his potential 2020 campaign, he told reporters, setting up a possible clash with other Democrats https://cnn.it/2D4dDc9 pic.twitter.com/TTu0m4j5h2,,former new york mayor michael bloomberg would selffund potential 2020 campaign told reporters setting possible clash democrats,,237,,63,,1547275864,,2019-01-12 01:51:04
@cnn,,OutFrontCNN,,"She just said 'I'm lost and I don't know where I am, and I need help.'"  Jeanne Nutter was walking her dog when she was approached by Jayme Closs, the Wisconsin teen who'd been missing for 87 days.  https://cnn.it/2QDcegk pic.twitter.com/lujKI0rq6X,,she said im lost know am need help  jeanne nutter walking dog approached jayme closs wisconsin teen whod missing 87 days,,308,,62,,1547275085,,2019-01-12 01:38:05
@cnn,,CNN,,The Trump administration's mixed messages on Syria are disastrous | By David A. Andelman via @CNNOpinionhttps://cnn.it/2D4I4Po ,,trump administrations mixed messages syria disastrous  david a andelman via,,194,,97,,1547275264,,2019-01-12 01:41:04
@cnn,,CNN,,This is the week Washington gave up completely | Analysis by @CillizzaCNN https://cnn.it/2D6wHGZ pic.twitter.com/8llldYhQza,,week washington gave completely  analysis cillizzacnn,,155,,57,,1547274665,,2019-01-12 01:31:05
@cnn,,CNN,,SpaceX is laying off 10% of its 6,000-person workforce as it tackles two hugely expensive moonshot projects https://cnn.it/2D5adGo pic.twitter.com/VHOyBPCOOj,,spacex laying 10 6000person workforce tackles two hugely expensive moonshot projects,,105,,58,,1547274366,,2019-01-12 01:26:06
@cnn,,OutFrontCNN,,Giant concrete wall "a 4th-century response to a 21st-century problem." Rep. @JenniferWexton tells @ErinBurnett "there are much more efficient and effective ways to stop drugs and contraband from coming over ... we certainly would be supportive of those." https://cnn.it/2QB6CmR pic.twitter.com/80RNkmrXRf,,giant concrete wall a 4thcentury response 21stcentury problem rep jenniferwexton tells erinburnett there much efficient effective ways stop drugs contraband coming  certainly would supportive those,,438,,101,,1547271603,,2019-01-12 00:40:03
@cnn,,CNN,,Macron vowed to fight the populists. Now he's being engulfed by them | Analysis by CNN's Melissa Bell https://cnn.it/2D59Tra pic.twitter.com/7BR4wQKRmV,,macron vowed fight populists hes engulfed  analysis cnns melissa bell,,106,,41,,1547274066,,2019-01-12 01:21:06
@cnn,,CNN,,HUD is trying to help thousands of low-income renters as the partial government shutdown continues https://cnn.it/2D5xc3K pic.twitter.com/DZlkjFfiWG,,hud trying help thousands lowincome renters partial government shutdown continues,,124,,64,,1547273767,,2019-01-12 01:16:07
@cnn,,CNN,,The congressional testimony of former Trump lawyer Michael Cohen is set to be a highly anticipated moment in the new Democratic-controlled House, but those expecting significant public insights into the Russia investigation could be disappointedhttps://cnn.it/2D5wIKY ,,congressional testimony former trump lawyer michael cohen set highly anticipated moment new democraticcontrolled house expecting significant public insights russia investigation could,,219,,70,,1547273463,,2019-01-12 01:11:03
@cnn,,CNN,,On Friday, the signs changed in Barron, Wisconsin, from "Pray for Jayme" to "Welcome Home Jayme" as the town of about 3,400 people celebrated the best news they could imagine: Jayme Closs, 13, had been foundhttps://cnn.it/2D5bFbA ,,friday signs changed barron wisconsin pray jayme welcome home jayme town 3400 people celebrated best news could imagine jayme closs 13,,694,,127,,1547272864,,2019-01-12 01:01:04
@cnn,,CNN,,Sen. Tim Scott smashes the black GOP "bargain" over King | Analysis by CNN's Nia-Malika Henderson https://cnn.it/2FvUgdX pic.twitter.com/AewOEUZ1uT,,sen tim scott smashes black gop bargain king  analysis cnns niamalika henderson,,217,,76,,1547272566,,2019-01-12 00:56:06
@cnn,,CNN,,Blue states are seeking to block new Trump administration rules that would make it harder for some women to get birth control at no cost https://cnn.it/2Fsz48z pic.twitter.com/w2xhJLnZsu,,blue states seeking block new trump administration rules would make harder women get birth control cost,,344,,107,,1547272264,,2019-01-12 00:51:04
@cnn,,CNNSitRoom,,Has Donald Trump met his match in Nancy Pelosi? @BrianToddCNN reports on the President's testy relationship with the House speaker. https://cnn.it/2VNbQiY pic.twitter.com/SgWaRFxCOH,,donald trump met match nancy pelosi briantoddcnn reports presidents testy relationship house speaker,,412,,119,,1547270316,,2019-01-12 00:18:36
@cnn,,CNN,,As the partial government shutdown wrapped up its third week, some employees and unions within the Department of Homeland Security voiced frustrations with President Trump's strategy and the loss of pay https://cnn.it/2D1YisA pic.twitter.com/XLfMmXH8d5,,partial government shutdown wrapped third week employees unions within department homeland security voiced frustrations president trumps strategy loss pay,,256,,99,,1547271917,,2019-01-12 00:45:17
@cnn,,CNN,,A double-decker bus crashed in Ottawa, Ontario, killing three people and injuring at least 20, Mayor Jim Watson said https://cnn.it/2D5IncX pic.twitter.com/PdUAdIZO3I,,doubledecker bus crashed ottawa ontario killing three people injuring least 20 mayor jim watson said,,100,,57,,1547271265,,2019-01-12 00:34:25
@cnn,,CNN,,The White House is expected to pull the nomination of an experienced career diplomat for US ambassador to Qatar and instead tap former one-term Virginia congressman Scott Taylor, sources say https://cnn.it/2D1XpjK pic.twitter.com/4Y0ooWENes,,white house expected pull nomination experienced career diplomat us ambassador qatar instead tap former oneterm virginia congressman scott taylor sources say,,75,,53,,1547271008,,2019-01-12 00:30:08
@cnn,,CNN,,Sen. Tim Scott, the sole black Republican senator, lambasted Republican Rep. Steve King for his recent sympathetic comments toward white supremacists. King has a history of making anti-immigration and racist remarks.https://cnn.it/2D5oouQ ,,sen tim scott sole black republican senator lambasted republican rep steve king recent sympathetic comments toward white supremacists king history making antiimmigration racist,,2799,,983,,1547270902,,2019-01-12 00:28:22
@cnn,,CNN,,Canada wants to welcome more than 1 million new permanent residents in the next three years. That's nearly one percent of the country's population each yearhttps://cnn.it/2D42Ezs ,,canada wants welcome 1 million new permanent residents next three years thats nearly one percent countrys population,,1379,,470,,1547270765,,2019-01-12 00:26:05
@cnn,,CNNSitRoom,,"I have decided to run and will be making a formal announcement within the next week."  Rep. Tulsi Gabbard tells Van Jones she will run for president in 2020. https://cnn.it/2FqwboI pic.twitter.com/WtHe5Qsv7V,,i decided run making formal announcement within next week  rep tulsi gabbard tells van jones run president 2020,,340,,103,,1547269816,,2019-01-12 00:10:16
@cnn,,CNN,,Republican Sen. Rick Scott was just sworn into office on Tuesday, but by Thursday he was on the phone with President Trump lobbying him not to use Florida disaster money for a border wall, a source says https://cnn.it/2D3f0Yz pic.twitter.com/HebY1cdLwb,,republican sen rick scott sworn office tuesday thursday phone president trump lobbying use florida disaster money border wall source says,,303,,111,,1547270326,,2019-01-12 00:18:46
@cnn,,CNN,,Unemployment claims by furloughed federal workers skyrocketed more than 400% in the last week of December, according to the most recent figures from the US Department of Laborhttps://cnn.it/2FvPGfL ,,unemployment claims furloughed federal workers skyrocketed 400 last week december according recent figures us department,,282,,191,,1547269124,,2019-01-11 23:58:44
@cnn,,CNNSitRoom,,"We have a core problem. We have a President without shame, who is backed by a party without spine, that is supported by a network called Fox News, without integrity," says author @tomfriedman, of Donald Trump.  https://cnn.it/2QCC8AJ pic.twitter.com/St1Yw1Sbtw,,we core problem president without shame backed party without spine supported network called fox news without integrity says author tomfriedman donald trump,,17420,,7118,,1547268111,,2019-01-11 23:41:51
@cnn,,CNN,,Rep. Tulsi Gabbard says she will run for president in 2020. "I have decided to run and will be making a formal announcement within the next week," the Hawaii Democrat and Iraq War veteran told CNN's @VanJones68 https://cnn.it/2D4B6tX pic.twitter.com/nNNmGCED5C,,rep tulsi gabbard says run president 2020 i decided run making formal announcement within next week hawaii democrat iraq war veteran told cnns vanjones68,,8499,,2689,,1547267824,,2019-01-11 23:37:04
@cnn,,CNN,,BREAKING: Rep. Tulsi Gabbard, a Democrat from Hawaii and the first Hindu member of Congress, says she's running for President in 2020 https://cnn.it/2FsABLM pic.twitter.com/Y0X8rfKQ35,,breaking rep tulsi gabbard democrat hawaii first hindu member congress says running president 2020,,9556,,3227,,1547267597,,2019-01-11 23:33:17
@cnn,,CNN,,The Trump Organization has hired a former White House lawyer to assist with congressional inquiries into President Trump's business interests https://cnn.it/2FsvpYo pic.twitter.com/xtp7YqybH8,,trump organization hired former white house lawyer assist congressional inquiries president trumps business interests,,99,,47,,1547267466,,2019-01-11 23:31:06
@cnn,,CNNSitRoom,,President Trump said he is still open to declaring a national emergency over immigration at the southern border, but added that he would "rather not," calling it an "easy way out" https://cnn.it/2D6gstl pic.twitter.com/7lUmiGObZr,,president trump said still open declaring national emergency immigration southern border added would rather not calling easy way out,,114,,45,,1547263367,,2019-01-11 22:22:47
@cnn,,CNN,,More than 150 US ambassadors are flying to Washington next week for the annual chief of mission conference, even though State Department employees are not being paid as the government shutdown drags on https://cnn.it/2FssoHy pic.twitter.com/DYaGcIdwyV,,150 us ambassadors flying washington next week annual chief mission conference even though state department employees paid government shutdown drags,,110,,70,,1547266866,,2019-01-11 23:21:06
@cnn,,CNNSitRoom,,Democratic Rep. Mike Quigley says President Trump "would be creating victims a second time" if funds from President Trump's border wall were diverted from a pool meant for Puerto Rico, Texas and other areas hit by disasters. https://cnn.it/2VL3F71 pic.twitter.com/DBwtGavtbe,,democratic rep mike quigley says president trump would creating victims second time funds president trumps border wall diverted pool meant puerto rico texas areas hit disasters,,387,,147,,1547264481,,2019-01-11 22:41:21
@cnn,,CNN,,Taco Bell is attempting to reach a broader customer base by testing out an offering of vegetarian menu items https://cnn.it/2AH4N2F pic.twitter.com/wlbcIw3Zcz,,taco bell attempting reach broader customer base testing offering vegetarian menu items,,277,,65,,1547266680,,2019-01-11 23:18:00
@cnn,,CNN,,As the partial government shutdown drags on, Senate Majority Leader Mitch McConnell heads home to Kentucky, leaving Democrats angry https://cnn.it/2D63iwt pic.twitter.com/pXtqVWbEDk,,partial government shutdown drags on senate majority leader mitch mcconnell heads home kentucky leaving democrats angry,,221,,121,,1547266237,,2019-01-11 23:10:37
@cnn,,CNN,,The medieval era "required leaders who were flexible, intelligent and able to understand the complexities of their world...The wall won't work - not because it's a throwback to imagined medieval barbarism, but because it's a con." -David Perry, @CNNOpinionhttps://cnn.it/2FvSNnA ,,medieval era required leaders flexible intelligent able understand complexities worldthe wall work  throwback imagined medieval barbarism con david perry,,610,,199,,1547265956,,2019-01-11 23:05:56
@cnn,,CNN,,Despite previously unfruitful negotiations, President Trump says he wants to reopen the government and is urging party leaders to return to Washington and vote for a wall, or barrier, or whatever they wish to call it -- even "peaches"https://cnn.it/2D39iWD ,,despite previously unfruitful negotiations president trump says wants reopen government urging party leaders return washington vote wall barrier whatever wish call  even,,337,,99,,1547264778,,2019-01-11 22:46:18
@cnn,,TheLeadCNN,,"I pay my taxes. I do what I'm supposed to do. I shouldn't have to be without a job."  Workers who suddenly find themselves without pay are turning to loans, food banks, and unemployment offices for help during partial gov't shutdown: @scottmclean reports https://cnn.it/2CeSJWi pic.twitter.com/EMoNl1Vn0z,,i pay taxes im supposed do without job  workers suddenly find without pay turning loans food banks unemployment offices help partial govt shutdown scottmclean reports,,642,,231,,1547261536,,2019-01-11 21:52:16
@cnn,,CNN,,We're on the snowy roads of St. Louis, where the city and surrounding counties are under a winter storm warning today into the weekend. Watch on Facebook: https://cnn.it/2D5kSAw pic.twitter.com/2Fp204EX1G,,were snowy roads st louis city surrounding counties winter storm warning today weekend watch facebook,,125,,40,,1547263912,,2019-01-11 22:31:52
@cnn,,CNN,,Former Georgia gubernatorial candidate Stacey Abrams is discussing a possible run for one of the state's seats in the US Senate in 2020 and has already started talking with top Democrats about a potential bid, a source says https://cnn.it/2D5wrIb pic.twitter.com/Pz0KjCysAs,,former georgia gubernatorial candidate stacey abrams discussing possible run one states seats us senate 2020 already started talking top democrats potential bid source says,,1135,,196,,1547263112,,2019-01-11 22:18:32
@cnn,,CNN,,662(!) days before the 2020 election, the sprint is on | Analysis by @CillizzaCNN https://cnn.it/2D5Yoj3 pic.twitter.com/7r5Xri7FYz,,662 days 2020 election sprint  analysis cillizzacnn,,162,,56,,1547262353,,2019-01-11 22:05:53
@cnn,,CNN,,Officials give an update on a Wisconsin girl who escaped captivity months after her parents were killed. Watch CNN: http://CNN.it/go pic.twitter.com/sPAyQ0NHJk,,officials give update wisconsin girl escaped captivity months parents killed watch cnn,,75,,27,,1547262265,,2019-01-11 22:04:25
@cnn,,CNN,,2019 is the year the streaming wars get real https://cnn.it/2Fr6KDn pic.twitter.com/7WHKYgQM2G,,2019 year streaming wars get real,,106,,33,,1547262032,,2019-01-11 22:00:32
@cnn,,TheLeadCNN,,.@jaketapper: The ongoing partial federal shutdown is "a complete and utter failure of one of the government's most basic responsibilities." "For nearly 1 million Americans... today is payday without any pay. 0.00 is the amount federal workers... are seeing on their paychecks."pic.twitter.com/rRya7JQi23,,jaketapper ongoing partial federal shutdown a complete utter failure one governments basic responsibilities for nearly 1 million americans today payday without pay 000 amount federal workers seeing paycheckspictwittercomrrya7jqi23,,1003,,405,,1547260520,,2019-01-11 21:35:20
@cnn,,CNN,,A little boy accidentally left his teddy bear, Sutro, at a hotel in Hawaii, so staff gave the lost bear and his companion, a stuffed seal named Kauai, the five-star spa treatment https://cnn.it/2CdHYn6 pic.twitter.com/KfSnGCvwkP,,little boy accidentally left teddy bear sutro hotel hawaii staff gave lost bear companion stuffed seal named kauai fivestar spa treatment,,750,,172,,1547261159,,2019-01-11 21:45:59
@cnn,,CNN,,Alexandria Ocasio-Cortez finds a Republican ally for legal pot https://cnn.it/2Fslp1c pic.twitter.com/e9pxVsA6za,,alexandria ocasiocortez finds republican ally legal pot,,311,,88,,1547260823,,2019-01-11 21:40:23
@cnn,,CNN,,Canada wants to welcome more than 1 million new permanent residents in the next three years. That's nearly one percent of the country's population each year (clarifies percentage)https://cnn.it/2FlWg99 ,,canada wants welcome 1 million new permanent residents next three years thats nearly one percent countrys population year clarifies,,368,,125,,1547260093,,2019-01-11 21:28:13
@cnn,,CNNnewsroom,,"Can I just geek out for a second?" @BrookeBCNN says as she talks to legendary stylist @Pat_Field on her career and favorite decade of American fashion.  Don’t miss the premiere of #AmericanStyle on @CNN, Sunday at 9p ETpic.twitter.com/WScWlkTqcB,,can geek second brookebcnn says talks legendary stylist patfield career favorite decade american fashion  don’t miss premiere americanstyle cnn sunday 9p etpictwittercomwscwlktqcb,,95,,26,,1547258774,,2019-01-11 21:06:14
@cnn,,CNN,,Missing Wisconsin teenager Jayme Closs was found alive 87 days after her parents were shot to death in their family home. Barron County Sheriff Chris Fitzgerald joins Full Circle to discuss the investigation. Tune in on Facebook Watch at 6:25p ET. https://cnn.it/2Fqd9Pi pic.twitter.com/t5OaaPiWI1,,missing wisconsin teenager jayme closs found alive 87 days parents shot death family home barron county sheriff chris fitzgerald joins full circle discuss investigation tune facebook watch 625p et,,209,,59,,1547259768,,2019-01-11 21:22:48
@cnn,,CNN,,Congo opposition leader Martin Fayulu said he will challenge the country's election results in court as he accused presidential winner Felix Tshisekedi of taking a "dangerous shortcut to power" https://cnn.it/2FsNOnZ pic.twitter.com/Dkns6nfXye,,congo opposition leader martin fayulu said challenge countrys election results court accused presidential winner felix tshisekedi taking dangerous shortcut power,,90,,56,,1547259006,,2019-01-11 21:10:06
@cnn,,CNNnewsroom,,"Relief, still scared, happy," - Kidnapping survivor, Katie Beers, tells @BrookeBCNN how 13-year-old Jayme Closs must be feeling right now.  "She probably has not dealt with the fact that her parents were shot and killed." http://cnn.it/2D2XeEN pic.twitter.com/dvT7BOP45U,,relief still scared happy  kidnapping survivor katie beers tells brookebcnn 13yearold jayme closs must feeling right now  she probably dealt fact parents shot killed,,105,,36,,1547258239,,2019-01-11 20:57:19
@cnn,,CNN,,President Trump said he is still open to declaring a national emergency over immigration at the southern border, but added that he would "rather not," calling it an "easy way out" https://cnn.it/2D6gstl pic.twitter.com/YslKJZfDFE,,president trump said still open declaring national emergency immigration southern border added would rather not calling easy way out,,137,,64,,1547258574,,2019-01-11 21:02:54
@cnn,,CNNnewsroom,,There's "a problem of confidence of the public in government," says fmr. North Dakota Sen. Heidi Heitkamp citing a bill she introduced to suspend congressional salaries during a shutdown.  The shutdown has also stalled a bill to address missing Native American women.pic.twitter.com/z0jqhyjLPM,,theres a problem confidence public government says fmr north dakota sen heidi heitkamp citing bill introduced suspend congressional salaries shutdown  shutdown also stalled bill address missing native american womenpictwittercomz0jqhyjlpm,,738,,233,,1547256944,,2019-01-11 20:35:44
@cnn,,CNN,,Lionsgate, a struggling motion picture studio, has laid off about 25 staffers https://cnn.it/2FvuFBT pic.twitter.com/HGAkQTUl8g,,lionsgate struggling motion picture studio laid 25 staffers,,109,,71,,1547258165,,2019-01-11 20:56:05
@cnn,,CNN,,President Trump says he won't declare a national emergency right now, and seeks to reassure federal workers that they will be paid. https://cnn.it/2VLDBIY pic.twitter.com/XIn4NMwNCt,,president trump says declare national emergency right now seeks reassure federal workers paid,,323,,138,,1547257738,,2019-01-11 20:48:58
@cnn,,CNN,,A far-right German politician is creating his own political organization. The new party's logo includes a cornflower, which was also adopted as a secret symbol by Nazis in the 1930s https://cnn.it/2D5VVW1 pic.twitter.com/xDR8zfgo17,,farright german politician creating political organization new partys logo includes cornflower also adopted secret symbol nazis 1930s,,136,,133,,1547257468,,2019-01-11 20:44:28
@cnn,,CNN,,Republicans are divided on whether Trump should declare a national emergency to get border wall funds https://cnn.it/2D5Q56R pic.twitter.com/IIHgY2VdZW,,republicans divided whether trump declare national emergency get border wall funds,,147,,80,,1547256873,,2019-01-11 20:34:33
@cnn,,CNN,,Why do Americans love #denim? See where the love affair started, #AmericanStyle, Sunday at 9p ET on CNNpic.twitter.com/u9i6oLQl8M,,americans love denim see love affair started americanstyle sunday 9p et cnnpictwittercomu9i6olql8m,,211,,93,,1547256495,,2019-01-11 20:28:15
@cnn,,CNN,,Former Texas Rep. Beto O'Rourke will be interviewed by Oprah Winfrey on February 5 in Times Square https://cnn.it/2D3EYey pic.twitter.com/Mqcj2EoZrz,,former texas rep beto orourke interviewed oprah winfrey february 5 times square,,1027,,246,,1547256265,,2019-01-11 20:24:25
@cnn,,CNNnewsroom,,"To hear the leader of our country is threatening to take funding from us, it's quite the gut punch," says Jason Klump, who lost his home when the entire town of Paradise, California, was destroyed. http://cnn.it/2D49R2F pic.twitter.com/b6dnQHeMOV,,to hear leader country threatening take funding us quite gut punch says jason klump lost home entire town paradise california destroyed,,562,,214,,1547254783,,2019-01-11 19:59:43
@cnn,,CNN,,Mexico's gas shortage fuels long lines at the pump https://cnn.it/2Fs5vUE pic.twitter.com/RRSBAOf8bI,,mexicos gas shortage fuels long lines pump,,130,,100,,1547255459,,2019-01-11 20:10:59
@cnn,,CNN,,National park visitors cut down protected Joshua trees during the partial government shutdown https://cnn.it/2FoONFH pic.twitter.com/8uxa6MuCFo,,national park visitors cut protected joshua trees partial government shutdown,,189,,162,,1547254687,,2019-01-11 19:58:07
@cnn,,CNNnewsroom,,"I have been sick. I don't want to go to the doctor," explains  furloughed worker Jacqueline Maloney on the practical impact of the shutdown.  "My daughter came to me when school was ready to start...and she said, 'Mom I don't have to have a snack.'" http://cnn.it/2Ft9z6P pic.twitter.com/ZbR2JdGr45,,i sick want go doctor explains  furloughed worker jacqueline maloney practical impact shutdown  my daughter came school ready startand said mom snack,,464,,188,,1547252694,,2019-01-11 19:24:54
@cnn,,CNN,,The current government shutdown has resulted from an impasse over border security; here's a look back at a few previous shutdowns in years pasthttps://cnn.it/2D4TWkw ,,current government shutdown resulted impasse border security heres look back previous shutdowns years,,141,,70,,1547253628,,2019-01-11 19:40:28
@cnn,,CNNnewsroom,,"This is an American embarrassment," says @BrookeBCNN as thousands of workers go without pay and thousand others are affected by the shutdown.  "Many federal employees are working without getting paid and Senators are getting paid but hardly working." http://cnn.it/2Ft9z6P pic.twitter.com/rYMOadFMrk,,this american embarrassment says brookebcnn thousands workers go without pay thousand others affected shutdown  many federal employees working without getting paid senators getting paid hardly working,,590,,229,,1547251772,,2019-01-11 19:09:32
@cnn,,CNN,,Sun-lovers and fans of Mickey and Minnie flock to Florida year-round, but the Sunshine State has a lot more to offer than Disney World and the beach. https://cnn.it/2RI0uxv pic.twitter.com/87IfoawTQj,,sunlovers fans mickey minnie flock florida yearround sunshine state lot offer disney world beach,,113,,51,,1547252157,,2019-01-11 19:15:57
@cnn,,CNN,,Investors thought Edible Arrangements would fail. Here's why it didn't: https://cnn.it/2TzAZMh  | #BossFiles with @PoppyHarlowCNNpic.twitter.com/Hh1oldDy38,,investors thought edible arrangements would fail heres didnt  bossfiles poppyharlowcnnpictwittercomhh1olddy38,,67,,50,,1547251200,,2019-01-11 19:00:00
@cnn,,CNN,,"Oh my God. Oh my God. I'm shaking." This Milwaukee bus driver went above the call of duty when she stopped and ran out to scoop up a baby girl who was wandering barefoot on a freeway overpass in freezing temperatures, and approaching an intersection https://cnn.it/2CbLDBP pic.twitter.com/DohG2t9XLc,,oh god oh god im shaking milwaukee bus driver went call duty stopped ran scoop baby girl wandering barefoot freeway overpass freezing temperatures approaching intersection,,4685,,1395,,1547250600,,2019-01-11 18:50:00
@cnn,,CNN,,A team of scientists discovered a series of repeating radio waves emanating from billions of light years away https://cnn.it/2AGz01T pic.twitter.com/YYxOp6hrbz,,team scientists discovered series repeating radio waves emanating billions light years away,,404,,171,,1547250000,,2019-01-11 18:40:00
@cnn,,CNN,,Lin-Manuel Miranda is bringing his hit musical "Hamilton" to Puerto Rico. "Hamilton" will premiere tonight at the Centro de Bellas Artes in San Juan. https://cnn.it/2FrDsV9 pic.twitter.com/Hj8ElvYCEQ,,linmanuel miranda bringing hit musical hamilton puerto rico hamilton premiere tonight centro de bellas artes san juan,,480,,102,,1547249405,,2019-01-11 18:30:05
@cnn,,CNN,,Bud Light packages will now show nutritional information https://cnn.it/2D46PeQ pic.twitter.com/i2ORzBQ8A0,,bud light packages show nutritional information,,173,,68,,1547248807,,2019-01-11 18:20:07
@cnn,,CNN,,As the Trump administration begins its third year, a quarter of the President's Cabinet is filled by acting department heads. Across the government, almost 40% of key leadership positions that require Senate confirmation are vacant. https://cnn.it/2RFx5Eu pic.twitter.com/cVyTUNryuN,,trump administration begins third year quarter presidents cabinet filled acting department heads across government almost 40 key leadership positions require senate confirmation vacant,,360,,218,,1547248748,,2019-01-11 18:19:08
@cnn,,CNN,,These gadgets are changing the way moms pump breast milk https://cnn.it/2CeWNFP pic.twitter.com/K7fc24rW1A,,gadgets changing way moms pump breast milk,,159,,50,,1547248166,,2019-01-11 18:09:26
@cnn,,CNN,,American Catholics' faith in the church and clergy has fallen sharply in the last year, according to a new Gallup survey https://cnn.it/2FsD9ta pic.twitter.com/4Hh3y00XFc,,american catholics faith church clergy fallen sharply last year according new gallup survey,,152,,82,,1547247608,,2019-01-11 18:00:08
@cnn,,CNN,,Taco Bell is attempting to reach a broader customer base by testing out an offering of vegetarian menu items https://cnn.it/2RLDVrK pic.twitter.com/75DEuZNxuY,,taco bell attempting reach broader customer base testing offering vegetarian menu items,,549,,125,,1547247116,,2019-01-11 17:51:56
@cnn,,CNNnewsroom,,Devon Russell, a security officer at the Smithsonian who isn’t getting paid today, says he’s “disgusted” with the shutdown.  “I blame the president. I believe he doesn't have to be as stubborn as he is being right now with trying to pay for this wall.” https://cnn.it/2Ft9z6P pic.twitter.com/PjmbZKoBN8,,devon russell security officer smithsonian isn’t getting paid today says he’s “disgusted” shutdown  “i blame the president i believe be as stubborn right now trying pay this wall”,,543,,135,,1547243761,,2019-01-11 16:56:01
@cnn,,CNN,,The Florida sheriff whose office responded to the massacre at Marjory Stoneman Douglas High School in Parkland will be suspended by the state's new governor Friday, a source familiar with the process tells CNN https://cnn.it/2FsbNDO pic.twitter.com/FiZdUSEb1u,,florida sheriff whose office responded massacre marjory stoneman douglas high school parkland suspended states new governor friday source familiar process tells cnn,,212,,74,,1547246522,,2019-01-11 17:42:02
@cnn,,CNN,,If you're heading to the Maldives for a holiday, there's a strong chance your journey will include a flight on a sea plane. This is what it's like to fly along with the "barefoot pilots" who carry passengers around the popular Indian Ocean destination. https://cnn.it/2Foey8Y pic.twitter.com/gamkPP4FtF,,heading maldives holiday theres strong chance journey include flight sea plane like fly along barefoot pilots carry passengers around popular indian ocean destination,,393,,148,,1547246137,,2019-01-11 17:35:37
@cnn,,CNN,,Canada wants to welcome more than 1 million new permanent residents in the next three years. That's nearly one percent of the country's population.https://cnn.it/2D1iJpy ,,canada wants welcome 1 million new permanent residents next three years thats nearly one percent countrys,,4280,,1254,,1547245354,,2019-01-11 17:22:34
@cnn,,CNN,,70 direct effects of the partial government shutdown (and counting) https://cnn.it/2Fsg1v9 pic.twitter.com/ORjfzhuHe6,,70 direct effects partial government shutdown and counting,,114,,84,,1547244906,,2019-01-11 17:15:06
@cnn,,CNN,,People over the age of 65 share fake news stories on Facebook more than any other age group, according to a study https://cnn.it/2D4qnQ8 pic.twitter.com/APwPRWNEKf,,people age 65 share fake news stories facebook age group according study,,523,,241,,1547244666,,2019-01-11 17:11:06
@cnn,,CNN,,Volkswagen sold a record 10.8 million cars in 2018. Only 100,000 were electrified. https://cnn.it/2D4BEQC pic.twitter.com/48RZVv8hcs,,volkswagen sold record 108 million cars 2018 100000 electrified,,166,,78,,1547243639,,2019-01-11 16:53:59
@cnn,,CNN,,Macy's stock plunged close to 18%, its worst day in history, after the company reported sluggish sales for November and December and trimmed its guidance https://cnn.it/2FqjtGp pic.twitter.com/IbSqLHa4dG,,macys stock plunged close 18 worst day history company reported sluggish sales november december trimmed guidance,,99,,70,,1547243005,,2019-01-11 16:43:25
@cnn,,CNN,,A winter storm is poised to leave a blanket of snow this weekend over more than 1,500 miles from Denver to Washington https://cnn.it/2FolnY2 pic.twitter.com/0RpziTBWmc,,winter storm poised leave blanket snow weekend 1500 miles denver washington,,201,,107,,1547242408,,2019-01-11 16:33:28
@cnn,,CNN,,Miami International Airport will close a terminal early for three days because of a shortage of TSA screeners, an airport spokesman sayshttps://cnn.it/2FrxJP7 ,,miami international airport close terminal early three days shortage tsa screeners airport spokesman,,340,,243,,1547242193,,2019-01-11 16:29:53
@cnn,,CNN,,Between 6.2 million and 7.3 million people in the United States have developed the flu this season, according to data released by the CDC https://cnn.it/2Fqz60w pic.twitter.com/I5hgUqfOVs,,62 million 73 million people united states developed flu season according data released cdc,,142,,91,,1547241688,,2019-01-11 16:21:28
@cnn,,CNN,,Ford is cutting thousands of jobs, ending production of some models and closing a plant in Europe ahead of a possible alliance with market leader Volkswagen https://cnn.it/2D4X3cj pic.twitter.com/M46jt40yJC,,ford cutting thousands jobs ending production models closing plant europe ahead possible alliance market leader volkswagen,,125,,102,,1547241514,,2019-01-11 16:18:34
@cnn,,CNN,,The ”Pope's favorite nun," Sister Norma Pimentel, participated in a roundtable with Pres. Trump today in Rio Grande after a publishing an op-ed welcoming him to the border and appealing for him to “put human dignity first.” Hear from her on Full Circle: https://cnn.it/2FsVCFZ pic.twitter.com/LFnyfbujcG,,”popes favorite nun sister norma pimentel participated roundtable pres trump today rio grande publishing oped welcoming border appealing “put human dignity first” hear full circle,,137,,79,,1547240876,,2019-01-11 16:07:56
@cnn,,cnnbrk,,Authorities give an update on Jayme Closs, a 13-year-old Wisconsin girl found alive months after her parents were found dead. Follow developments:https://cnn.it/2D2XeEN ,,authorities give update jayme closs 13yearold wisconsin girl found alive months parents found dead follow,,1017,,262,,1547240406,,2019-01-11 16:00:06
@cnn,,CNN,,A record number of CEOs left their jobs last quarter, according to a report released by a job placement firm. The number who departed their posts in 2018 is the highest annual total since 2008, when the financial crisis hit. https://cnn.it/2Ftk62e pic.twitter.com/Nr5sdVtjYX,,record number ceos left jobs last quarter according report released job placement firm number departed posts 2018 highest annual total since 2008 financial crisis hit,,77,,62,,1547240290,,2019-01-11 15:58:10
@cnn,,CNN,,This is what some federal worker's pay stubs look like today https://cnn.it/2Foem9E pic.twitter.com/fHe0i0l53H,,federal workers pay stubs look like today,,206,,165,,1547239803,,2019-01-11 15:50:03
@cnn,,CNN,,The total fertility rate for the United States in 2017 continued to dip below what's needed for the population to replace itself, according to a new report https://cnn.it/2D2ULKx pic.twitter.com/YRlDLTqqSK,,total fertility rate united states 2017 continued dip whats needed population replace itself according new report,,244,,128,,1547239206,,2019-01-11 15:40:06
@cnn,,CNN,,As the partial government shutdown continues without an end in sight, FBI agents say that lack of funding is hurting their operationshttps://cnn.it/2FoBEMS ,,partial government shutdown continues without end sight fbi agents say lack funding hurting,,308,,180,,1547238611,,2019-01-11 15:30:11
@cnn,,CNN,,Democratic voters don't want their own businessman in 2020 | Analysis by CNN's @ForecasterEnten https://cnn.it/2Frn6Ms pic.twitter.com/UdW20iX6Op,,democratic voters want businessman 2020  analysis cnns forecasterenten,,122,,30,,1547238009,,2019-01-11 15:20:09
@cnn,,CNN,,People who eat diets that are high in fiber have lower risk of death and chronic diseases such as stroke or cancer compared with people with low fiber intake, a new analysis finds https://cnn.it/2D2kp23 pic.twitter.com/E16v6cdNxR,,people eat diets high fiber lower risk death chronic diseases stroke cancer compared people low fiber intake new analysis finds,,282,,113,,1547237407,,2019-01-11 15:10:07
@cnn,,CNN,,The ongoing partial government shutdown hit a new milestone today by matching the record for the longest government shutdown in US history.  Today marks the 21st day of the partial shutdown that started days before Christmas. https://cnn.it/2FuGsjT pic.twitter.com/Bi4BzueNJZ,,ongoing partial government shutdown hit new milestone today matching record longest government shutdown us history  today marks 21st day partial shutdown started days christmas,,145,,85,,1547236810,,2019-01-11 15:00:10
@cnn,,CNN,,These are the Republicans you should watch to see if they break with Trump on the shutdown https://cnn.it/2FrjvOs pic.twitter.com/HGTnBOmXhv,,republicans watch see break trump shutdown,,139,,55,,1547236205,,2019-01-11 14:50:05
@cnn,,CNN,,2 female rookie police officers have been shot and killed in 2 days https://cnn.it/2D383qH pic.twitter.com/HOLhO2oWUm,,2 female rookie police officers shot killed 2 days,,396,,263,,1547235608,,2019-01-11 14:40:08
@cnn,,CNN,,People over the age of 65 share fake news stories on Facebook more than any other age group, according to a study https://cnn.it/2D440Kz pic.twitter.com/9O7ZvKlF6G,,people age 65 share fake news stories facebook age group according study,,502,,207,,1547235010,,2019-01-11 14:30:10
@cnn,,CNNnewsroom,,"We are expecting a baby next week... This should be one of the happiest moments of our lives and we have this hanging over our heads," says federal worker, William Striffler, who got a $0 paycheck today.  "We don't want to be used as political pawns." http://cnn.it/2FnMJxs pic.twitter.com/CVKWfdbSxq,,we expecting baby next week one happiest moments lives hanging heads says federal worker william striffler got 0 paycheck today  we want used political pawns,,602,,209,,1547234217,,2019-01-11 14:16:57
@cnn,,CNN,,Sen. Bernie Sanders apologized again to the women who have come forward in recent weeks to allege they were sexually harassed while working for his 2016 presidential campaign https://cnn.it/2D2VSdf pic.twitter.com/SNHM8JAIxp,,sen bernie sanders apologized women come forward recent weeks allege sexually harassed working 2016 presidential campaign,,155,,63,,1547234408,,2019-01-11 14:20:08
@cnn,,CNN,,The world's oceans are warming at an accelerated rate and are much warmer than scientists thought, according to a new studyhttps://cnn.it/2D4h0jm ,,worlds oceans warming accelerated rate much warmer scientists thought according new,,626,,415,,1547233805,,2019-01-11 14:10:05
@cnn,,CNN,,Some House Democrats have been unhappy with progressive Rep. Alexandria Ocasio-Cortez's resistance to falling in line with her fellow party members, particularly her threats to support primary challenges against incumbents, Politico reports https://cnn.it/2D3Blp7 pic.twitter.com/VuOOuncMWU,,house democrats unhappy progressive rep alexandria ocasiocortezs resistance falling line fellow party members particularly threats support primary challenges incumbents politico reports,,365,,59,,1547233361,,2019-01-11 14:02:41
@cnn,,CNN,,CNN’s @ChristineRomans has the day's top business headlines before the opening bell on Wall Street http://cnn.it/2RH7w5J pic.twitter.com/z3SZeTALXn,,cnn’s christineromans days top business headlines opening bell wall street,,59,,22,,1547232827,,2019-01-11 13:53:47
@cnn,,CNN,,The government shutdown could soon put the immigration enforcement arm of the Department of Homeland Security at risk of running out of funds and unable to pay contract dueshttps://cnn.it/2D4GNbh ,,government shutdown could soon put immigration enforcement arm department homeland security risk running funds unable pay contract,,283,,130,,1547232782,,2019-01-11 13:53:02
@cnn,,CNN,,Jeff and Mackenzie Bezos' divorce could drastically reduce his stake in Amazon and open the door for her to become one of its largest shareholders, with new leverage at the company https://cnn.it/2Fr12l5 pic.twitter.com/NCUaOj65L5,,jeff mackenzie bezos divorce could drastically reduce stake amazon open door become one largest shareholders new leverage company,,589,,164,,1547232200,,2019-01-11 13:43:20
@cnn,,CNN,,The total fertility rate for the United States in 2017 continued to dip below what's needed for the population to replace itself, according to a new report https://cnn.it/2FqVdE3 pic.twitter.com/5F91w00OyP,,total fertility rate united states 2017 continued dip whats needed population replace itself according new report,,356,,128,,1547231645,,2019-01-11 13:34:05
@cnn,,CNN,,As the partial government shutdown continues without an end in sight, FBI agents say that lack of funding is hurting their operationshttps://cnn.it/2D3BmcI ,,partial government shutdown continues without end sight fbi agents say lack funding hurting,,321,,165,,1547231101,,2019-01-11 13:25:01
@cnn,,CNN,,Democratic voters don't want their own businessman in 2020 | Analysis by CNN's @ForecasterEnten https://cnn.it/2FpYLGG pic.twitter.com/wsZW9sFMea,,democratic voters want businessman 2020  analysis cnns forecasterenten,,132,,30,,1547230550,,2019-01-11 13:15:50
@cnn,,CNN,,"Oh my God. Oh my God. I'm shaking." This Milwaukee bus driver went above the call of duty when she stopped and ran out to scoop up a baby girl who was wandering barefoot on a freeway overpass in freezing temperatures, and approaching an intersection https://cnn.it/2CbLDBP pic.twitter.com/9ItU4fh4ZM,,oh god oh god im shaking milwaukee bus driver went call duty stopped ran scoop baby girl wandering barefoot freeway overpass freezing temperatures approaching intersection,,17971,,5015,,1547230034,,2019-01-11 13:07:14
@cnn,,CNN,,Venezuelan President Nicolas Maduro was sworn in for a second term on Thursday amid a longstanding economic crisis and pressure from some Latin American neighbors that won't recognize his presidency after a disputed election https://cnn.it/2D2mGdM pic.twitter.com/7jaoi2Skpt,,venezuelan president nicolas maduro sworn second term thursday amid longstanding economic crisis pressure latin american neighbors recognize presidency disputed election,,98,,56,,1547229993,,2019-01-11 13:06:33
@cnn,,CNN,,People who eat diets that are high in fiber have lower risk of death and chronic diseases such as stroke or cancer compared with people with low fiber intake, a new analysis finds https://cnn.it/2D3ZpIm pic.twitter.com/S58XMC5k6R,,people eat diets high fiber lower risk death chronic diseases stroke cancer compared people low fiber intake new analysis finds,,311,,124,,1547229418,,2019-01-11 12:56:58
@cnn,,CNN,,When Maj. Rachael Winiecki's fighter jet took off from an Air Force base in California in December, it was a routine flight. But by the time she landed, she had made history as the first female pilot to complete an F-35 test mission. https://cnn.it/2D3UEPe pic.twitter.com/UKhi4Pi3Sf,,maj rachael winieckis fighter jet took air force base california december routine flight time landed made history first female pilot complete f35 test mission,,648,,112,,1547228871,,2019-01-11 12:47:51
@cnn,,CNN,,There was confusion Friday over where the Saudi woman would be resettled. Thailand's immigration police chief initially said she was offered asylum by Australia and Canada, but he later requested that statement be retracted. This story has been updated:http://cnn.it/2D3D3H8 ,,confusion friday saudi woman would resettled thailands immigration police chief initially said offered asylum australia canada later requested statement retracted story,,121,,47,,1547228372,,2019-01-11 12:39:32
@cnn,,CNN,,Trump is creating a 'crisis' to distract from the real crisis of a flailing president | By Frida Ghitis via @CNNOpinion https://cnn.it/2D3uOe5 pic.twitter.com/EOO6mwcZUV,,trump creating crisis distract real crisis flailing president  frida ghitis via cnnopinion,,1450,,373,,1547228321,,2019-01-11 12:38:41
@cnn,,CNN,,Despite the shutdown, the Interior Department holds meetings on opening Alaskan land for oil leases https://cnn.it/2D3YY0I pic.twitter.com/lKwchmJQ84,,despite shutdown interior department holds meetings opening alaskan land oil leases,,120,,95,,1547227780,,2019-01-11 12:29:40
@cnn,,CNN,,70 direct effects of the partial government shutdown (and counting) https://cnn.it/2FnKN8a pic.twitter.com/gYg7gWXes6,,70 direct effects partial government shutdown and counting,,130,,86,,1547227247,,2019-01-11 12:20:47
@cnn,,CNN,,This is what some federal worker's pay stubs look like today https://cnn.it/2FqLSMv pic.twitter.com/Tvhgigukjq,,federal workers pay stubs look like today,,189,,185,,1547226666,,2019-01-11 12:11:06
@cnn,,CNN,,Democrats are denouncing big money. But they are powerless to stop it in 2020. https://cnn.it/2FpdCBe pic.twitter.com/sXl4VGKzz2,,democrats denouncing big money powerless stop 2020,,93,,26,,1547226311,,2019-01-11 12:05:11
@cnn,,CNN,,People over the age of 65 share fake news stories on Facebook more than any other age group, according to a study https://cnn.it/2D44UqG pic.twitter.com/l1jp2VZu4f,,people age 65 share fake news stories facebook age group according study,,446,,225,,1547226158,,2019-01-11 12:02:38
@cnn,,CNN,,What explains the fascinating radio bursts from outer space | By Don Lincoln, a senior scientist at Fermi National Accelerator Laboratory, via @CNNOpinion https://cnn.it/2FqXFus pic.twitter.com/7JB7KeFhEi,,explains fascinating radio bursts outer space  lincoln senior scientist fermi national accelerator laboratory via cnnopinion,,174,,68,,1547225641,,2019-01-11 11:54:01
@cnn,,NewDay,,Jayme Closs, a 13-year-old girl who vanished after her parents were found dead in their northwestern Wisconsin home in October, has been found alive, according to the Barron County Sheriff's Department.  @Ryanyoungnews has the latest details: https://cnn.it/2QFweie pic.twitter.com/bB20rXRkLz,,jayme closs 13yearold girl vanished parents found dead northwestern wisconsin home october found alive according barron county sheriffs department  ryanyoungnews latest details,,262,,51,,1547224763,,2019-01-11 11:39:23
@cnn,,CNN,,Sen. Bernie Sanders apologized again to the women who have come forward in recent weeks to allege they were sexually harassed while working for his 2016 presidential campaign https://cnn.it/2D4bfC8 pic.twitter.com/4Mdytlhyzh,,sen bernie sanders apologized women come forward recent weeks allege sexually harassed working 2016 presidential campaign,,144,,61,,1547225129,,2019-01-11 11:45:29
@cnn,,NewDay,,President Trump's former lawyer Michael Cohen will testify publicly before Congress next month.  “He can be basically a devastating character witness against the President, @abbydphillip says. “He can talk about who Donald Trump really is in his view..." https://cnn.it/2QExjqG pic.twitter.com/VFwc20rrRS,,president trumps former lawyer michael cohen will testify publicly congress next month  “he basically devastating character witness president abbydphillip says “he talk donald trump really view,,453,,89,,1547224275,,2019-01-11 11:31:15
@cnn,,CNN,,A Border Patrol agent accused of killing four women in South Texas pleaded not guilty during an arraignmenthttps://cnn.it/2D3kylX ,,border patrol agent accused killing four women south texas pleaded guilty,,243,,172,,1547224610,,2019-01-11 11:36:50
@cnn,,CNN,,China claims to have deployed missiles "capable of targeting medium and large ships," days after the latest US Navy "freedom of navigation" operation near contested islands in the South China Sea https://cnn.it/2D1Wakz ,,china claims deployed missiles capable targeting medium large ships days latest us navy freedom navigation operation near contested islands south china sea,,130,,80,,1547224095,,2019-01-11 11:28:15
@cnn,,NewDay,,The Trump administration is actively examining using billions of dollars in unspent Defense Department disaster recovery and military construction funds for the construction of a border.  @abbydphillip, @rachaelmbade and @JohnAvlon discuss: https://cnn.it/2QEbFTi pic.twitter.com/zF9ksbvvVR,,trump administration actively examining using billions dollars unspent defense department disaster recovery military construction funds construction border  abbydphillip rachaelmbade johnavlon discuss,,261,,122,,1547223411,,2019-01-11 11:16:51
@cnn,,CNN,,The world's oceans are warming at an accelerated rate and are much warmer than scientists thought, according to a new studyhttps://cnn.it/2FufhFT ,,worlds oceans warming accelerated rate much warmer scientists thought according new,,342,,242,,1547223590,,2019-01-11 11:19:50
@cnn,,CNN,,Hindered by a hip injury, British tennis great Andy Murray announced that he plans to retire at Wimbledon -- at the latest -- in an emotional press conference ahead of the Australian Open https://cnn.it/2D22JDY pic.twitter.com/rdmWd0y3tA,,hindered hip injury british tennis great andy murray announced plans retire wimbledon  latest  emotional press conference ahead australian open,,238,,84,,1547223086,,2019-01-11 11:11:26
@cnn,,CNN,,Mexican authorities found at least 20 bodies, most of them burned, along a dirt road in the northern state of Tamaulipas near the US border, officials saidhttps://cnn.it/2D4KtKh ,,mexican authorities found least 20 bodies burned along dirt road northern state tamaulipas near us border officials,,161,,101,,1547222587,,2019-01-11 11:03:07
@cnn,,CNN,,Taco Bell will test out a vegetarian menu in some restaurants in the coming months https://cnn.it/2D2C3CR pic.twitter.com/bdDvR7keyU,,taco bell test vegetarian menu restaurants coming months,,396,,81,,1547222082,,2019-01-11 10:54:42
@cnn,,CNN,,The remains of six unidentified Holocaust victims are to be given a formal Jewish burial after being stored at London's Imperial War Museum for decades https://cnn.it/2D2xfxB pic.twitter.com/hyuA71wJSR,,remains six unidentified holocaust victims given formal jewish burial stored londons imperial war museum decades,,227,,51,,1547221580,,2019-01-11 10:46:20
@cnn,,CNN,,Hindered by a hip injury, British tennis great Andy Murray announced that he plans to retire at Wimbledon -- at the latest -- in an emotional press conference ahead of the Australian Open https://cnn.it/2D3Kjm7 pic.twitter.com/9OrN9NRrSZ,,hindered hip injury british tennis great andy murray announced plans retire wimbledon  latest  emotional press conference ahead australian open,,274,,84,,1547221084,,2019-01-11 10:38:04
@cnn,,CNN,,She had been missing for 87 days. Then 13-year-old Jayme Closs turned up 70 miles north of where she was last seen. https://cnn.it/2Fp00G8 ,,missing 87 days 13yearold jayme closs turned 70 miles north last seen,,184,,36,,1547220588,,2019-01-11 10:29:48
@cnn,,CNN,,The drug overdose death rate among women 30 to 64 years old climbed more than 260% from 1999 to 2017, according to a new reporthttps://cnn.it/2Fq2T9J ,,drug overdose death rate among women 30 64 years old climbed 260 1999 2017 according new,,140,,96,,1547220100,,2019-01-11 10:21:40
@cnn,,CNN,,The first US military ground equipment has been withdrawn from Syria in recent days, signaling the beginning of the drawdown ordered by President Trump, according to an administration officialhttps://cnn.it/2Frwtvm ,,first us military ground equipment withdrawn syria recent days signaling beginning drawdown ordered president trump according administration,,121,,62,,1547219607,,2019-01-11 10:13:27
@cnn,,CNN,,"Surviving R. Kelly" sparked renewed interest in allegations of sexual misconduct by the singer.  But the accusations of abuse, manipulation and inappropriate encounters with girls and young women have been around -- and vehemently denied -- for decades.https://cnn.it/2Fs7qIz ,,surviving r kelly sparked renewed interest allegations sexual misconduct singer  accusations abuse manipulation inappropriate encounters girls young women around  vehemently denied ,,152,,67,,1547219124,,2019-01-11 10:05:24
@cnn,,CNN,,277 passengers and crew members aboard the Royal Caribbean's Oasis of the Seas cruise ship became sick with a gastrointestinal illness, according to the cruise line, and the ship is returning a day earlier than expectedhttps://cnn.it/2FnM0MW ,,277 passengers crew members aboard royal caribbeans oasis seas cruise ship became sick gastrointestinal illness according cruise line ship returning day earlier,,192,,123,,1547218624,,2019-01-11 09:57:04
@cnn,,CNN,,Las Vegas police investigating a rape allegation against Cristiano Ronaldo have sent a warrant to authorities in Italy requesting a sample of the Portuguese football superstar's DNA, a police spokeswoman said https://cnn.it/2FpZckn pic.twitter.com/6WP5girgtb,,las vegas police investigating rape allegation cristiano ronaldo sent warrant authorities italy requesting sample portuguese football superstars dna police spokeswoman said,,2498,,1701,,1547218131,,2019-01-11 09:48:51
@cnn,,CNN,,South Korea is investigating whether conscientious objectors seeking exemption from military service have played violent video gameshttps://cnn.it/2D2nizT ,,south korea investigating whether conscientious objectors seeking exemption military service played violent video,,104,,50,,1547217633,,2019-01-11 09:40:33
@cnn,,CNN,,A US sportswear company has dropped a Chinese supplier over fears its products were produced using forced labor in detention camps in Xinjiang https://cnn.it/2FoTTBG pic.twitter.com/vuo7TcWcJQ,,us sportswear company dropped chinese supplier fears products produced using forced labor detention camps xinjiang,,137,,51,,1547217125,,2019-01-11 09:32:05
@cnn,,CNN,,GOP Sen. Lindsey Graham issued a statement calling for President Trump to invoke national emergency powers to fund his border wall https://cnn.it/2Fu0gnv pic.twitter.com/yjoCXA1XDq,,gop sen lindsey graham issued statement calling president trump invoke national emergency powers fund border wall,,129,,45,,1547216654,,2019-01-11 09:24:14
@cnn,,CNN,,After nearly three months, missing 13-year-old Jayme Closs has been found alive https://cnn.it/2Fux8wr ,,nearly three months missing 13yearold jayme closs found alive,,259,,49,,1547216156,,2019-01-11 09:15:56
@cnn,,CNN,,A mysterious bright object in the sky, dubbed "The Cow," was captured in real time by telescopes around the world this past summer. Astronomers believe that it could be the birth of a black hole or neutron star, or a new class of object. https://cnn.it/2Fr6uEE pic.twitter.com/VtrDvKf22G,,mysterious bright object sky dubbed the cow captured real time telescopes around world past summer astronomers believe could birth black hole neutron star new class object,,292,,114,,1547215780,,2019-01-11 09:09:40
@cnn,,CNN,,Canada wants to welcome more than 1 million new permanent residents in the next three years. That's nearly one percent of the country's population.https://cnn.it/2D4u0Wh ,,canada wants welcome 1 million new permanent residents next three years thats nearly one percent countrys,,997,,244,,1547215283,,2019-01-11 09:01:23
@cnn,,CNN,,This is the week the game changed in the Russia investigation | Analysis by @CillizzaCNN https://cnn.it/2D0uL2s pic.twitter.com/2GbVC1kSgm,,week game changed russia investigation  analysis cillizzacnn,,152,,55,,1547214800,,2019-01-11 08:53:20
@cnn,,CNN,,As special counsel Robert Mueller wraps up his Russia probe, investigators have focused on conflicting public statements by President Trump and his team that could be seen as an effort to influence witnesses and obstruct justice, sources say https://cnn.it/2FnO4EK pic.twitter.com/0brpTRYDqU,,special counsel robert mueller wraps russia probe investigators focused conflicting public statements president trump team could seen effort influence witnesses obstruct justice sources say,,212,,87,,1547214416,,2019-01-11 08:46:56
@cnn,,CNN,,Former Trump lawyer Michael Cohen has agreed to testify publicly before Congress, a major first move from House Democrats investigating the President https://cnn.it/2D3ypIX pic.twitter.com/iyZyjHgzN8,,former trump lawyer michael cohen agreed testify publicly congress major first move house democrats investigating president,,281,,73,,1547213934,,2019-01-11 08:38:54
@cnn,,CNN,,Senate Majority Leader Mitch McConnell blocks Senate Democrats' move to reopen the government https://cnn.it/2FtUySB pic.twitter.com/N8Rocgwrzw,,senate majority leader mitch mcconnell blocks senate democrats move reopen government,,147,,87,,1547213359,,2019-01-11 08:29:19
@cnn,,CNN,,The Trump administration is actively examining using billions in unspent Defense Department disaster recovery and military construction funds for the construction of a border wall in the event the President declares a national emergency, a US official sayshttps://cnn.it/2FnKXN4 ,,trump administration actively examining using billions unspent defense department disaster recovery military construction funds construction border wall event president declares national emergency us official,,186,,69,,1547212787,,2019-01-11 08:19:47
@cnn,,CNN,,Don Lutes Jr. kept the 1943 copper penny he stumbled upon in his high school cafeteria seven decades ago in a safe behind a wall in his Massachusetts home, and it fetched a pretty penny at auction: $204,000https://cnn.it/2D3G7Ty ,,lutes jr kept 1943 copper penny stumbled upon high school cafeteria seven decades ago safe behind wall massachusetts home fetched pretty penny auction,,314,,84,,1547212411,,2019-01-11 08:13:31
@cnn,,CNN,,Nick Vallelonga, the Golden Globe-winning writer of the critically acclaimed drama "Green Book," has apologized for a 2015 tweet containing a false, Islamophobic statementhttps://cnn.it/2D35ncB ,,nick vallelonga golden globewinning writer critically acclaimed drama green book apologized 2015 tweet containing false islamophobic,,93,,30,,1547211901,,2019-01-11 08:05:01
@cnn,,CNN,,Republicans are bracing for the moment House Democrats formally request President Trump's tax returns, attempting to fully understand the scope of a 1920s law that Democrats say gives them the power to obtain Trump's tax returns with a simple request https://cnn.it/2D3trMj pic.twitter.com/aiTLaAdIKj,,republicans bracing moment house democrats formally request president trumps tax returns attempting fully understand scope 1920s law democrats say gives power obtain trumps tax returns simple request,,382,,117,,1547211430,,2019-01-11 07:57:10
@cnn,,CNN,,Myanmar's High Court has rejected the appeals of Wa Lone and Kyaw Soe Oo, two Reuters journalists who were sentenced to seven years in prison after investigating a massacre of Rohingya Muslimshttps://cnn.it/2D2hOoR ,,myanmars high court rejected appeals wa lone kyaw soe oo two reuters journalists sentenced seven years prison investigating massacre rohingya,,146,,167,,1547211126,,2019-01-11 07:52:06
@cnn,,CNN,,Rahaf Mohammed al-Qunun, the 18-year-old Saudi woman who fled to Thailand to escape her allegedly abusive family, has been granted asylum in Australia, a Thai immigration official sayshttps://cnn.it/2D2SkYq ,,rahaf mohammed alqunun 18yearold saudi woman fled thailand escape allegedly abusive family granted asylum australia thai immigration official,,1611,,338,,1547210775,,2019-01-11 07:46:15
@cnn,,CNN,,Former NFL quarterback Tim Tebow takes a knee and asks former Miss Universe Demi-Leigh Nel-Peters to marry him https://cnn.it/2D323hG pic.twitter.com/bAbFF5odEZ,,former nfl quarterback tim tebow takes knee asks former miss universe demileigh nelpeters marry,,374,,65,,1547210352,,2019-01-11 07:39:12
@cnn,,CNN,,The world's oceans are warming at an accelerated rate and are much warmer than scientists thought, according to a new studyhttps://cnn.it/2Fqmg2v ,,worlds oceans warming accelerated rate much warmer scientists thought according new,,412,,305,,1547209863,,2019-01-11 07:31:03
@cnn,,CNN,,A female police officer has died after being shot outside a home Wednesday evening as she prepared to start her shift in the northwestern Louisiana city of Shreveport, officials saidhttps://cnn.it/2D3tAiQ ,,female police officer died shot outside home wednesday evening prepared start shift northwestern louisiana city shreveport officials,,150,,91,,1547209452,,2019-01-11 07:24:12
@cnn,,CNN,,She was the first woman to ever officiate a college football bowl game.  Then she became the NFL's first full-time female official.  This weekend, Sarah Thomas will become the first woman to officiate an NFL playoff game.  https://cnn.it/2FtL4GZ pic.twitter.com/7Q093cl5zN,,first woman ever officiate college football bowl game  became nfls first fulltime female official  weekend sarah thomas become first woman officiate nfl playoff game,,3766,,861,,1547209056,,2019-01-11 07:17:36
@cnn,,CNN,,If you're heading to the Maldives for a holiday, there's a strong chance your journey will include a flight on a sea plane. This is what it's like to fly along with the "barefoot pilots" who carry passengers around the popular Indian Ocean destination. https://cnn.it/2Foey8Y pic.twitter.com/obzle0vodG,,heading maldives holiday theres strong chance journey include flight sea plane like fly along barefoot pilots carry passengers around popular indian ocean destination,,472,,227,,1547208960,,2019-01-11 07:16:00
@cnn,,CNN,,A Northwestern University sophomore killed herself because of severe hazing she endured while pledging to the Alpha Kappa Alpha sorority in the fall of 2016, according to a federal lawsuit filed by her mother this week https://cnn.it/2Fp5fFP pic.twitter.com/BrtXvRmIdP,,northwestern university sophomore killed severe hazing endured pledging alpha kappa alpha sorority fall 2016 according federal lawsuit filed mother week,,184,,98,,1547208568,,2019-01-11 07:09:28
@cnn,,CNN,,Astronomers believe that a recently discovered super-Earth, only six light-years away, might be able to support life https://cnn.it/2FogdLO pic.twitter.com/nrbOJQCUTK,,astronomers believe recently discovered superearth six lightyears away might able support life,,557,,169,,1547208076,,2019-01-11 07:01:16
@cnn,,CNN,,Dramatic footage shows a mountainside rescue in the French Alps earlier this month. After a skier was injured on the slopes, a police helicopter flew in to assist. https://cnn.it/2RnJIV2 pic.twitter.com/aFL51HRXrg,,dramatic footage shows mountainside rescue french alps earlier month skier injured slopes police helicopter flew assist,,390,,127,,1547208060,,2019-01-11 07:01:00
@cnn,,CNN,,Former Trump lawyer Michael Cohen agrees to testify publicly before Congress, the first major move from House Democrats investigating the President https://cnn.it/2D4O3E9 pic.twitter.com/l0etsAzYbj,,former trump lawyer michael cohen agrees testify publicly congress first major move house democrats investigating president,,360,,87,,1547207680,,2019-01-11 06:54:40
@cnn,,CNN,,Dead and injured birds covered in tinsel and other decorations have been turning up in New Zealand https://cnn.it/2Fr9CjF pic.twitter.com/1JM5xMCxQ7,,dead injured birds covered tinsel decorations turning new zealand,,104,,52,,1547207193,,2019-01-11 06:46:33
@cnn,,CNN,,Hyundai has released its concept for a "walking" car that would be able to climb a five-foot wall and step over a five-foot gap https://cnn.it/2RiMDOX pic.twitter.com/6DByHneMx1,,hyundai released concept walking car would able climb fivefoot wall step fivefoot gap,,698,,308,,1547207160,,2019-01-11 06:46:00
@cnn,,CNN,,Demonstrators carried signs and a "Baby Trump" balloon even made an appearance as President Trump visited Texas today to discuss border security and immigration https://cnn.it/2FpBRiL pic.twitter.com/gkTi5bznLL,,demonstrators carried signs baby trump balloon even made appearance president trump visited texas today discuss border security immigration,,418,,103,,1547206808,,2019-01-11 06:40:08
@cnn,,CNN,,Canada wants to welcome more than 1 million new permanent residents in the next three years. That's nearly one percent of the country's population.https://cnn.it/2Fr7MiL ,,canada wants welcome 1 million new permanent residents next three years thats nearly one percent countrys,,5301,,1742,,1547206267,,2019-01-11 06:31:07
@cnn,,CNN,,Hawaii has a new black sand beach formed by the devastating eruption of Kilauea Volcano last year https://cnn.it/2D4Jvh3 pic.twitter.com/54NDrLZFIF,,hawaii new black sand beach formed devastating eruption kilauea volcano last year,,563,,140,,1547205565,,2019-01-11 06:19:25
@cnn,,CNN,,A team of scientists discovered a series of repeating radio waves emanating from billions of light years away https://cnn.it/2AGz01T pic.twitter.com/3IqHDQTf5F,,team scientists discovered series repeating radio waves emanating billions light years away,,499,,187,,1547205360,,2019-01-11 06:16:00
@cnn,,CNN,,The next winter storm is poised to leave a blanket of snow from Denver to Washington. Major cities in between -- like St. Louis -- could see the brunt of the storm with over a half a foot of snow possible through the weekend. https://cnn.it/2D4caCN pic.twitter.com/CF482xVBhT,,next winter storm poised leave blanket snow denver washington major cities  like st louis  could see brunt storm half foot snow possible weekend,,141,,72,,1547204998,,2019-01-11 06:09:58
@cnn,,CNN,,One man had a bomb in the spare tire well of his car when authorities arrested him in 1999. Another was walking along a train track in Vermont with explosives in his bag when police intercepted him in 1987. Both men crossed the US border -- from Canada.https://cnn.it/2D24ilp ,,one man bomb spare tire well car authorities arrested 1999 another walking along train track vermont explosives bag police intercepted 1987 men crossed us border ,,739,,344,,1547204466,,2019-01-11 06:01:06
@cnn,,CNN,,Denver could become the first US city to decriminalize magic mushrooms https://cnn.it/2Fs6RyO pic.twitter.com/71YnXIYPQw,,denver could become first us city decriminalize magic mushrooms,,618,,159,,1547203724,,2019-01-11 05:48:44
@cnn,,CNN,,A news helicopter happened across an epic game of Mario Kart being played on the big screen at the Kansas City Royals' Kauffman Stadium https://cnn.it/2SSmkfq pic.twitter.com/o0OsovsjoP,,news helicopter happened across epic game mario kart played big screen kansas city royals kauffman stadium,,440,,115,,1547203561,,2019-01-11 05:46:01
@cnn,,CNN,,Jayme Closs, a 13-year-old girl who vanished after her parents were found dead in their northwestern Wisconsin home, has been found alive, the Barron County Sheriff's Department said https://cnn.it/2FqfRV2 pic.twitter.com/D7Z6qFJH4k,,jayme closs 13yearold girl vanished parents found dead northwestern wisconsin home found alive barron county sheriffs department said,,461,,93,,1547203230,,2019-01-11 05:40:30
@cnn,,CNN,,This pilot photographs storms from the airplane cockpit https://cnn.it/2FtytDk pic.twitter.com/L7Df4LRR6e,,pilot photographs storms airplane cockpit,,1946,,591,,1547202670,,2019-01-11 05:31:10
@cnn,,CNN,,An Alphabet shareholder is suing the company's board of directors, claiming it helped cover up allegations of sexual misconduct by former Google executiveshttps://cnn.it/2FtuwPn ,,alphabet shareholder suing companys board directors claiming helped cover allegations sexual misconduct former google,,92,,39,,1547202596,,2019-01-11 05:29:56
@cnn,,CNNTonight,,"I'll be interested in hearing him talk about the campaign finance law violations, but more importantly, the dealings between the Trump organization and the Russians in the lead-up to the 2016 elections." - Rep. Krishnamoorthi on Michael Cohen's plans to testify before Congresspic.twitter.com/u4Cpbja7df,,ill interested hearing talk campaign finance law violations importantly dealings trump organization russians leadup 2016 elections  rep krishnamoorthi michael cohens plans testify congresspictwittercomu4cpbja7df,,687,,139,,1547197014,,2019-01-11 03:56:54
@cnn,,CNN,,People over the age of 65 share fake news stories on Facebook more than any other age group, according to a study https://cnn.it/2FrB2pt pic.twitter.com/309CltTrgZ,,people age 65 share fake news stories facebook age group according study,,591,,249,,1547202065,,2019-01-11 05:21:05
@cnn,,CNN,,Jaguar Land Rover is cutting 4,500 jobs globally while Ford is slashing thousands of jobs in Europe https://cnn.it/2SNINKn pic.twitter.com/8QN6LEL3J9,,jaguar land rover cutting 4500 jobs globally ford slashing thousands jobs europe,,130,,101,,1547201760,,2019-01-11 05:16:00
@cnn,,CNN,,"Oh my God. Oh my God. I'm shaking." This Milwaukee bus driver went above the call of duty when she stopped and ran out to scoop up a baby girl who was wandering barefoot on a freeway overpass in freezing temperatures, and approaching an intersection https://cnn.it/2CbLDBP pic.twitter.com/s8JUj5nixA,,oh god oh god im shaking milwaukee bus driver went call duty stopped ran scoop baby girl wandering barefoot freeway overpass freezing temperatures approaching intersection,,25589,,7151,,1547200860,,2019-01-11 05:01:00
@cnn,,CNN,,Don Lutes Jr. kept the 1943 copper penny he stumbled upon in his high school cafeteria seven decades ago in a safe behind a wall in his Massachusetts home, and it fetched a pretty penny at auction: $204,000https://cnn.it/2FrxraX ,,lutes jr kept 1943 copper penny stumbled upon high school cafeteria seven decades ago safe behind wall massachusetts home fetched pretty penny auction,,539,,135,,1547199965,,2019-01-11 04:46:05
@cnn,,CNN,,Despite the shutdown, the Interior Department holds meetings on opening Alaskan land for oil leases https://cnn.it/2D3omDS pic.twitter.com/62YSdGP45D,,despite shutdown interior department holds meetings opening alaskan land oil leases,,148,,128,,1547199064,,2019-01-11 04:31:04
@cnn,,CNNTonight,,Former Director of National Intelligence James Clapper tells CNN's @DonLemon that he has always felt that President Trump's firing of former FBI Director James Comey was "obstruction [of justice] just given what he said publicly" https://cnn.it/2D24IrT pic.twitter.com/NoBtKY7XsX,,former director national intelligence james clapper tells cnns donlemon always felt president trumps firing former fbi director james comey obstruction of justice given said publicly,,712,,196,,1547198003,,2019-01-11 04:13:23
@cnn,,CNN,,A Border Patrol agent accused of killing four women in South Texas pleaded not guilty during an arraignmenthttps://cnn.it/2D398P8 ,,border patrol agent accused killing four women south texas pleaded guilty,,149,,136,,1547198162,,2019-01-11 04:16:02
@cnn,,CNN,,Former NFL quarterback Tim Tebow takes a knee and asks former Miss Universe Demi-Leigh Nel-Peters to marry him https://cnn.it/2D2yoF4 pic.twitter.com/0ezuKY8FXX,,former nfl quarterback tim tebow takes knee asks former miss universe demileigh nelpeters marry,,695,,123,,1547197264,,2019-01-11 04:01:04
@cnn,,CNN,,"Surviving R. Kelly" sparked renewed interest in allegations of sexual misconduct by the singer.  But the accusations of abuse, manipulation and inappropriate encounters with girls and young women have been around -- and vehemently denied -- for decades.https://cnn.it/2D2wswi ,,surviving r kelly sparked renewed interest allegations sexual misconduct singer  accusations abuse manipulation inappropriate encounters girls young women around  vehemently denied ,,202,,91,,1547196361,,2019-01-11 03:46:01
@cnn,,CNN,,'I just don't see a pathway forward' | Analysis by @CillizzaCNN https://cnn.it/2D1RRWL pic.twitter.com/sdaLWn9cc9,,i see pathway forward  analysis cillizzacnn,,108,,42,,1547195976,,2019-01-11 03:39:36
@cnn,,CNN,,These gadgets are changing the way moms pump breast milk https://cnn.it/2CeWNFP pic.twitter.com/m63hMUAlzN,,gadgets changing way moms pump breast milk,,234,,67,,1547195760,,2019-01-11 03:36:00
@cnn,,CNN,,Miami International Airport will close a terminal early for three days because of a shortage of TSA screeners, an airport spokesman sayshttps://cnn.it/2D37MnK ,,miami international airport close terminal early three days shortage tsa screeners airport spokesman,,362,,319,,1547195467,,2019-01-11 03:31:07
@cnn,,CNN,,If you're heading to the Maldives for a holiday, there's a strong chance your journey will include a flight on a sea plane. This is what it's like to fly along with the "barefoot pilots" who carry passengers around the popular Indian Ocean destination. https://cnn.it/2Foey8Y pic.twitter.com/ymEyLpvGMu,,heading maldives holiday theres strong chance journey include flight sea plane like fly along barefoot pilots carry passengers around popular indian ocean destination,,961,,468,,1547195292,,2019-01-11 03:28:12
@cnn,,CuomoPrimeTime,,President Trump's new conservative majority in the Supreme Court could end up thwarting his plan to fund the wall by national emergency, says @ChrisCuomo. "That newly cemented majority, they are big fans of the separation of powers." https://cnn.it/2TF9z7H pic.twitter.com/0gyGaeOAJ4,,president trumps new conservative majority supreme court could end thwarting plan fund wall national emergency says chriscuomo that newly cemented majority big fans separation powers,,541,,154,,1547192303,,2019-01-11 02:38:23
@cnn,,CNN,,Republicans are bracing for the moment House Democrats formally request President Trump's tax returns, attempting to fully understand the scope of a 1920s law that Democrats say gives them the power to obtain Trump's tax returns with a simple request https://cnn.it/2FpW0VU pic.twitter.com/aIrvAAyqzY,,republicans bracing moment house democrats formally request president trumps tax returns attempting fully understand scope 1920s law democrats say gives power obtain trumps tax returns simple request,,798,,185,,1547194565,,2019-01-11 03:16:05
@cnn,,CNN,,As the partial government shutdown continues without an end in sight, FBI agents say that lack of funding is hurting their operationshttps://cnn.it/2Foc1eY ,,partial government shutdown continues without end sight fbi agents say lack funding hurting,,237,,111,,1547194483,,2019-01-11 03:14:43
@cnn,,CNN,,Taco Bell will test out a vegetarian menu in some restaurants in the coming months https://cnn.it/2ChXazp pic.twitter.com/wEEcNb9pnn,,taco bell test vegetarian menu restaurants coming months,,345,,98,,1547193660,,2019-01-11 03:01:00
@cnn,,CNN,,The first US military ground equipment has been withdrawn from Syria in recent days, signaling the beginning of the drawdown ordered by President Trump, according to an administration officialhttps://cnn.it/2D2AdSF ,,first us military ground equipment withdrawn syria recent days signaling beginning drawdown ordered president trump according administration,,116,,69,,1547193437,,2019-01-11 02:57:17
@cnn,,CuomoPrimeTime,,.@chriscuomo: If Robert Mueller is looking at false or misleading public statements, including those to the press, as proof of obstruction of justice, President Trump has trouble https://cnn.it/2AEq8cS pic.twitter.com/Su5SbaUjbC,,chriscuomo robert mueller looking false misleading public statements including press proof obstruction justice president trump trouble,,1594,,366,,1547191142,,2019-01-11 02:19:02
@cnn,,CNN,,Mexican authorities found at least 20 bodies, most of them burned, along a dirt road in the northern state of Tamaulipas near the US border, officials saidhttps://cnn.it/2D21Knh ,,mexican authorities found least 20 bodies burned along dirt road northern state tamaulipas near us border officials,,787,,721,,1547193181,,2019-01-11 02:53:01
@cnn,,CNN,,People who eat diets that are high in fiber have lower risk of death and chronic diseases such as stroke or cancer compared with people with low fiber intake, a new analysis finds https://cnn.it/2FnOvyM pic.twitter.com/mlWjLn2Srq,,people eat diets high fiber lower risk death chronic diseases stroke cancer compared people low fiber intake new analysis finds,,278,,107,,1547192942,,2019-01-11 02:49:02
@cnn,,AC360,,"I don't think anyone can be ok with the President circumventing the law," says Democratic Sen. @amyklobuchar on Trump's national emergency threat. "Congress...has said.. we need to reopen the government, we need to do it without a shutdown... without this wall."pic.twitter.com/YonNSNYW5H,,i think anyone ok president circumventing law says democratic sen amyklobuchar trumps national emergency threat congresshas said need reopen government need without shutdown without wallpictwittercomyonnsnyw5h,,2333,,593,,1547190074,,2019-01-11 02:01:14
@cnn,,CNN,,Jayme Closs, a 13-year-old girl who vanished after her parents were found dead in their northwestern Wisconsin home, has been found alive, the Barron County Sheriff's Department said https://cnn.it/2FqH5uz pic.twitter.com/5VM0a13AaN,,jayme closs 13yearold girl vanished parents found dead northwestern wisconsin home found alive barron county sheriffs department said,,2257,,768,,1547192643,,2019-01-11 02:44:03
@cnn,,CNN,,Taco Bell will test out a vegetarian menu in some restaurants in the coming months https://cnn.it/2FmJR3U pic.twitter.com/gB3qDbIfwg,,taco bell test vegetarian menu restaurants coming months,,592,,116,,1547191862,,2019-01-11 02:31:02
@cnn,,AC360,,"Democrats are going to treat [Michael Cohen] like he's St. Francis of Assisi," says @JeffreyToobin on the former Trump lawyer's planned testimony on Capitol Hill. "The Republicans are going to go after this guy as, you know, the criminal that he is." https://cnn.it/2VG8A9a pic.twitter.com/Vf9353yzmz,,democrats going treat michael cohen like hes st francis assisi says jeffreytoobin former trump lawyers planned testimony capitol hill the republicans going go guy as know criminal is,,259,,85,,1547189510,,2019-01-11 01:51:50
@cnn,,CNN,,277 passengers and crew members aboard the Royal Caribbean's Oasis of the Seas cruise ship became sick with a gastrointestinal illness, according to the cruise line, and the ship is returning a day earlier than expectedhttps://cnn.it/2D32OXR ,,277 passengers crew members aboard royal caribbeans oasis seas cruise ship became sick gastrointestinal illness according cruise line ship returning day earlier,,311,,219,,1547191148,,2019-01-11 02:19:08
@cnn,,CNN,,Hindered by a hip injury, British tennis great Andy Murray announced that he plans to retire at Wimbledon -- at the latest -- in an emotional press conference ahead of the Australian Open https://cnn.it/2D1UFTJ pic.twitter.com/uxzEOBtKHf,,hindered hip injury british tennis great andy murray announced plans retire wimbledon  latest  emotional press conference ahead australian open,,503,,240,,1547189757,,2019-01-11 01:55:57
@cnn,,AC360,,Trump has "got himself in a corner. He is desperately looking for a way out. He is turning to this ridiculous idea of taking money away from Puerto  and California and other places and putting it on what is not a serious crisis," CNN's @David_Gergen tells @andersoncooperpic.twitter.com/rHdoLEWdEv,,trump got corner desperately looking way out turning ridiculous idea taking money away puerto  california places putting serious crisis cnns davidgergen tells andersoncooperpictwittercomrhdolewdev,,3545,,1148,,1547187963,,2019-01-11 01:26:03
@cnn,,CNN,,"Oh my God. Oh my God. I'm shaking." This Milwaukee bus driver went above the call of duty when she stopped and ran out to scoop up a baby girl, barefoot in freezing temperatures, who was quickly walking toward an intersection https://cnn.it/2CbLDBP pic.twitter.com/dIMSwbo5q2,,oh god oh god im shaking milwaukee bus driver went call duty stopped ran scoop baby girl barefoot freezing temperatures quickly walking toward intersection,,41045,,12939,,1547188725,,2019-01-11 01:38:45
@cnn,,OutFrontCNN,,"Let's be honest, this President has a habit of pathological dissembling, and that's being polite."  Rep. @GerryConnolly reacts to Donald Trump claiming he never initially said Mexico would pay for a southern border wall.  https://cnn.it/2sjG53C pic.twitter.com/Y2fgQjjp0y,,lets honest president habit pathological dissembling thats polite  rep gerryconnolly reacts donald trump claiming never initially said mexico would pay southern border wall,,727,,210,,1547187864,,2019-01-11 01:24:24
@cnn,,CNN,,Gas stations in at least six Mexican states and the country's capital have been running dry for days. There's some concern exports could be affected, including tens of thousands of tons of avocados heading to the United States before the Super Bowl.https://cnn.it/2FnFfL2 ,,gas stations least six mexican states countrys capital running dry days theres concern exports could affected including tens thousands tons avocados heading united states super,,433,,200,,1547187665,,2019-01-11 01:21:05
@cnn,,CNN,,Hyundai has released its concept for a "walking" car that would be able to climb a five-foot wall and step over a five-foot gap https://cnn.it/2RiMDOX pic.twitter.com/x0GCvo45yJ,,hyundai released concept walking car would able climb fivefoot wall step fivefoot gap,,485,,217,,1547187060,,2019-01-11 01:11:00
@cnn,,AC360,,.@andersoncooper: For hundreds of thousands tonight, it is not a good evening. A good evening would be knowing that tomorrow, Friday, is payday and the bills are being taken care of.   This evening, though, they've got empty pay stubs and growing troubles. https://cnn.it/2RlhI4K pic.twitter.com/CIW7RZXGOq,,andersoncooper hundreds thousands tonight good evening good evening would knowing tomorrow friday payday bills taken care of   evening though theyve got empty pay stubs growing troubles,,1187,,417,,1547186826,,2019-01-11 01:07:06
@cnn,,CNN,,Style is more than the things we buy and the things we wear. Style is what we are made of. Don’t miss the premiere of #AmericanStyle on CNN, Sunday at 9p ETpic.twitter.com/yewO111TVb,,style things buy things wear style made of don’t miss premiere americanstyle cnn sunday 9p etpictwittercomyewo111tvb,,111,,32,,1547186825,,2019-01-11 01:07:05
@cnn,,CNN,,Jeff and Mackenzie Bezos' divorce could drastically reduce his stake in Amazon and open the door for her to become one of its largest shareholders, with new leverage at the company https://cnn.it/2D1ggLY pic.twitter.com/lVFlVYDD4J,,jeff mackenzie bezos divorce could drastically reduce stake amazon open door become one largest shareholders new leverage company,,549,,222,,1547186461,,2019-01-11 01:01:01
@cnn,,CNN,,Democratic voters don't want their own businessman in 2020 | Analysis by CNN's @ForecasterEnten https://cnn.it/2Ft4tYe pic.twitter.com/jENSlGI5gA,,democratic voters want businessman 2020  analysis cnns forecasterenten,,109,,34,,1547185862,,2019-01-11 00:51:02
@cnn,,CNNSitRoom,,Democrat @RepTedDeutch: "It’s a really important moment to have Michael Cohen come testify…We’re going to have the opportunity to ask him some very pointed questions about what the President did right before the election, potentially covering up a felony in order to be elected”pic.twitter.com/pISgmbc18r,,democrat repteddeutch it’s really important moment michael cohen come testify…we’re going opportunity ask pointed questions president right election potentially covering felony order elected”pictwittercompisgmbc18r,,442,,144,,1547180999,,2019-01-10 23:29:59
@cnn,,CNN,,70 direct effects of the partial government shutdown (and counting) https://cnn.it/2Fqt2oP pic.twitter.com/2XUJpt6Hi3,,70 direct effects partial government shutdown and counting,,132,,103,,1547185264,,2019-01-11 00:41:04
@cnn,,CNN,,A Northwestern University sophomore killed herself because of severe hazing she endured while pledging to the Alpha Kappa Alpha sorority in the fall of 2016, according to a federal lawsuit filed by her mother this week https://cnn.it/2D3HAsZ pic.twitter.com/s24ei57FyR,,northwestern university sophomore killed severe hazing endured pledging alpha kappa alpha sorority fall 2016 according federal lawsuit filed mother week,,232,,233,,1547184669,,2019-01-11 00:31:09
@cnn,,CNN,,Las Vegas police investigating a rape allegation against Cristiano Ronaldo have sent a warrant to authorities in Italy requesting a sample of the Portuguese football superstar's DNA, a police spokeswoman said https://cnn.it/2Frz8pc pic.twitter.com/EgjsiWnv1A,,las vegas police investigating rape allegation cristiano ronaldo sent warrant authorities italy requesting sample portuguese football superstars dna police spokeswoman said,,326,,175,,1547184362,,2019-01-11 00:26:02
@cnn,,CNN,,Ford is cutting thousands of jobs in Europe while Britain’s biggest carmaker, Jaguar Land Rover, is slashing 4,500 jobs globally https://cnn.it/2AIe6iC pic.twitter.com/HEWb7plle0,,ford cutting thousands jobs europe britain’s biggest carmaker jaguar land rover slashing 4500 jobs globally,,111,,82,,1547184060,,2019-01-11 00:21:00
@cnn,,CNNSitRoom,,"The President wants to take billions of dollars earmarked for recovery from storm-ravaged Puerto Rico — he wants to take that money and use it to fulfill a campaign promise that has nothing to do with national security,” Democrat @RepTedDeutch says. http://cnn.it/2H68eWn pic.twitter.com/rMTSOA9xSg,,the president wants take billions dollars earmarked recovery stormravaged puerto rico — wants take money use fulfill campaign promise nothing national security” democrat repteddeutch says,,453,,232,,1547181200,,2019-01-10 23:33:20
@cnn,,CNN,,The government shutdown could soon put the immigration enforcement arm of the Department of Homeland Security at risk of running out of funds and unable to pay contract dueshttps://cnn.it/2D15HIS ,,government shutdown could soon put immigration enforcement arm department homeland security risk running funds unable pay contract,,328,,163,,1547183468,,2019-01-11 00:11:08
@cnn,,CNNSitRoom,,“This was Michael Cohen’s mic drop moment. He just blew up (Trump’s) day, his week, his month … This is taking it public,” CNN’s @jamiegangel says about Michael Cohen heading to Congress to publicly testify. http://cnn.it/2H6b2CP pic.twitter.com/zxy4gH3kKp,,“this michael cohen’s mic drop moment blew trump’s day week month … taking public” cnn’s jamiegangel says michael cohen heading congress publicly testify,,1479,,399,,1547181992,,2019-01-10 23:46:32
@cnn,,CNN,,Trump is creating a 'crisis' to distract from the real crisis of a flailing president | By Frida Ghitis via @CNNOpinion https://cnn.it/2D3Evcp pic.twitter.com/NrgtgutzCD,,trump creating crisis distract real crisis flailing president  frida ghitis via cnnopinion,,808,,251,,1547182868,,2019-01-11 00:01:08
@cnn,,CNN,,GOP Sen. Lindsey Graham issued a statement calling for President Trump to invoke national emergency powers to fund his border wall https://cnn.it/2FmNRl7 pic.twitter.com/ssxtbIdpEN,,gop sen lindsey graham issued statement calling president trump invoke national emergency powers fund border wall,,673,,242,,1547182266,,2019-01-10 23:51:06
@cnn,,CNNBusiness,,Ford is cutting thousands of jobs in Europe while Britain’s biggest carmaker, Jaguar Land Rover, is slashing 4,500 jobs globally https://cnn.it/2D38HEz pic.twitter.com/Fxvzvy50zn,,ford cutting thousands jobs europe britain’s biggest carmaker jaguar land rover slashing 4500 jobs globally,,97,,73,,1547174700,,2019-01-10 21:45:00
@cnn,,CNNSitRoom,,South Carolina GOP Sen. Lindsey Graham is now calling on President Trump to use his emergency powers to fund the construction of the border wall, CNN’s @SunlenSerfaty reports from Capitol Hill. https://cnn.it/2RCQVAd pic.twitter.com/5h6Fisrmja,,south carolina gop sen lindsey graham calling president trump use emergency powers fund construction border wall cnn’s sunlenserfaty reports capitol hill,,174,,82,,1547178070,,2019-01-10 22:41:10
@cnn,,CNN,,This is the week the game changed in the Russia investigation | Analysis by @CillizzaCNN https://cnn.it/2D1G4Yd pic.twitter.com/qMyFGUFTs6,,week game changed russia investigation  analysis cillizzacnn,,211,,75,,1547181702,,2019-01-10 23:41:42
@cnn,,CNN,,The ”Pope's favorite nun," Sister Norma Pimentel, participated in a roundtable with Pres. Trump today in Rio Grande after a publishing an op-ed welcoming him to the border and appealing for him to “put human dignity first.” Hear from her on Full Circle: https://cnn.it/2FppiDZ pic.twitter.com/oV65JoHdS9,,”popes favorite nun sister norma pimentel participated roundtable pres trump today rio grande publishing oped welcoming border appealing “put human dignity first” hear full circle,,123,,35,,1547181120,,2019-01-10 23:32:00
@cnn,,CNN,,"I don't have a plan B. I have my savings account and then after that I have no idea what we're gonna do": This man and his wife are air traffic controllers. Both are no longer getting paid. https://cnn.it/2SMqCov pic.twitter.com/MVf2HRGhSZ,,i plan b savings account idea were gonna do man wife air traffic controllers longer getting paid,,460,,234,,1547181060,,2019-01-10 23:31:00
@cnn,,CNN,,The Trump administration is actively examining using billions in unspent Defense Department disaster recovery and military construction funds for the construction of a border wall in the event the President declares a national emergency, a US official sayshttps://cnn.it/2FsMYrn ,,trump administration actively examining using billions unspent defense department disaster recovery military construction funds construction border wall event president declares national emergency us official,,320,,145,,1547180639,,2019-01-10 23:23:59
@cnn,,CNN,,Sen. Bernie Sanders apologized again to the women who have come forward in recent weeks to allege they were sexually harassed while working for his 2016 presidential campaign https://cnn.it/2FpufwG pic.twitter.com/kysoEHOmW2,,sen bernie sanders apologized women come forward recent weeks allege sexually harassed working 2016 presidential campaign,,176,,61,,1547179529,,2019-01-10 23:05:29
@cnn,,CNNSitRoom,,President Trump’s legal team continues to beef up ahead of special counsel Robert Mueller finishing his report, despite Trump repeatedly saying there was “no collusion.” https://cnn.it/2RKl1l2 pic.twitter.com/Z152OsLpbp,,president trump’s legal team continues beef ahead special counsel robert mueller finishing report despite trump repeatedly saying “no collusion”,,164,,69,,1547179010,,2019-01-10 22:56:50
@cnn,,CNN,,A mysterious bright object in the sky, dubbed "The Cow," was captured in real time by telescopes around the world this past summer. Astronomers believe that it could be the birth of a black hole or neutron star, or a new class of object. https://cnn.it/2D268Cu pic.twitter.com/z8NSSNZLUf,,mysterious bright object sky dubbed the cow captured real time telescopes around world past summer astronomers believe could birth black hole neutron star new class object,,357,,119,,1547177939,,2019-01-10 22:38:59
@cnn,,CNN,,A team of scientists discovered a series of repeating radio waves emanating from billions of light years away https://cnn.it/2AGz01T pic.twitter.com/WeE2Qjdz5p,,team scientists discovered series repeating radio waves emanating billions light years away,,347,,138,,1547177460,,2019-01-10 22:31:00
@cnn,,CNN,,The House passed two spending bills to reopen shuttered parts of the government that address public health, agriculture, food stamps and housing, though the bills have an improbable fate in the Senate and the threat of a presidential vetohttps://cnn.it/2D1pdol ,,house passed two spending bills reopen shuttered parts government address public health agriculture food stamps housing though bills improbable fate senate threat presidential,,1036,,384,,1547177066,,2019-01-10 22:24:26
@cnn,,CNN,,As special counsel Robert Mueller wraps up his Russia probe, investigators have focused on conflicting public statements by President Trump and his team that could be seen as an effort to influence witnesses and obstruct justice, sources say https://cnn.it/2D24IrT pic.twitter.com/ia5scM7K6v,,special counsel robert mueller wraps russia probe investigators focused conflicting public statements president trump team could seen effort influence witnesses obstruct justice sources say,,314,,117,,1547176563,,2019-01-10 22:16:03
@cnn,,CNN,,Demonstrators carried signs and a "Baby Trump" balloon even made an appearance as President Trump visited Texas today to discuss border security and immigration https://cnn.it/2FrlpyG pic.twitter.com/GWnR4HGRJf,,demonstrators carried signs baby trump balloon even made appearance president trump visited texas today discuss border security immigration,,719,,197,,1547175962,,2019-01-10 22:06:02
@cnn,,CNN,,Macy's stock plunged close to 18%, its worst day in history, after the company reported sluggish sales for November and December and trimmed its guidance https://cnn.it/2D3XXpp pic.twitter.com/dw8EvIkEQp,,macys stock plunged close 18 worst day history company reported sluggish sales november december trimmed guidance,,85,,50,,1547175664,,2019-01-10 22:01:04
@cnn,,CNN,,Canada wants to welcome more than 1 million new permanent residents in the next three years. That's nearly one percent of the country's population.https://cnn.it/2D2Bg4W ,,canada wants welcome 1 million new permanent residents next three years thats nearly one percent countrys,,2935,,872,,1547175183,,2019-01-10 21:53:03
@cnn,,CNN,,When Maj. Rachael Winiecki's fighter jet took off from an Air Force base in California in December, it was a routine flight. But by the time she landed, she had made history as the first female pilot to complete an F-35 test mission. https://cnn.it/2FpdEcf pic.twitter.com/gnrHD0Bzoj,,maj rachael winieckis fighter jet took air force base california december routine flight time landed made history first female pilot complete f35 test mission,,506,,119,,1547174904,,2019-01-10 21:48:24
@cnn,,TheLeadCNN,,“Donald Trump did indeed say that he would force Mexico to make a direct payment to the United States. We reported it on this very show — April 5, 2016."  On this Throwback Thursday, @jaketapper brings it back to when Trump first laid out his plan to have Mexico pay for the wall.pic.twitter.com/Xtx39tyMj0,,“donald trump indeed say would force mexico make direct payment united states reported show — april 5 2016  throwback thursday jaketapper brings back trump first laid plan mexico pay wallpictwittercomxtx39tymj0,,3609,,1558,,1547174389,,2019-01-10 21:39:49
@cnn,,CNN,,The world's oceans are warming at an accelerated rate and are much warmer than scientists thought, according to a new studyhttps://cnn.it/2FpN9ni ,,worlds oceans warming accelerated rate much warmer scientists thought according new,,428,,334,,1547173990,,2019-01-10 21:33:10
@cnn,,CNN,,Jaguar Land Rover is cutting 4,500 jobs globally while Ford is slashing thousands of jobs in Europe https://cnn.it/2SNINKn pic.twitter.com/eXZUEHbQ0P,,jaguar land rover cutting 4500 jobs globally ford slashing thousands jobs europe,,139,,91,,1547173861,,2019-01-10 21:31:01
@cnn,,CNNBusiness,,The Dow climbed 123 points on Thursday, recovering from an early slide. The S&P 500 gained 0.5%, notching its first five-day win streak since September. The Nasdaq advanced for the 10th day in the past 11. https://cnn.it/2FoiSFa ,,dow climbed 123 points thursday recovering early slide sp 500 gained 05 notching first fiveday win streak since september nasdaq advanced 10th day past 11,,123,,41,,1547172650,,2019-01-10 21:10:50
@cnn,,CNN,,A news helicopter happened across an epic game of Mario Kart being played on the big screen at the Kansas City Royals' Kauffman Stadium https://cnn.it/2SSmkfq pic.twitter.com/IWplkfqj3d,,news helicopter happened across epic game mario kart played big screen kansas city royals kauffman stadium,,508,,109,,1547173283,,2019-01-10 21:21:23
@cnn,,CNNnewsroom,,"Very significant #BreakingNews, Michael Cohen - the President's former lawyer, longtime fixer - has agreed to testify before the House Oversight and Reform Committee on February 7th." - @mkraju, reporting from Capitol Hill.  https://cnn.it/2QCQdOx pic.twitter.com/XviyHmN9Bk,,very significant breakingnews michael cohen  presidents former lawyer longtime fixer  agreed testify house oversight reform committee february 7th  mkraju reporting capitol hill,,520,,177,,1547171859,,2019-01-10 20:57:39
@cnn,,CNN,,Another agency head leaves the Trump administration — and this one hasn't even been confirmed yet https://cnn.it/2FnBTHS pic.twitter.com/UPl52VlwGE,,another agency head leaves trump administration — one even confirmed yet,,149,,71,,1547173104,,2019-01-10 21:18:24
@cnn,,TheLeadCNN,,"I think Michael Cohen will help reveal some of the shady characters and shady practices the former casino owner from Atlantic City does in the White House,” Dem strategist @JamalSimmons says in the wake of news that Michael Cohen will testify publicly. https://cnn.it/2H6b2CP pic.twitter.com/95elhp4a2B,,i think michael cohen help reveal shady characters shady practices former casino owner atlantic city white house” dem strategist jamalsimmons says wake news michael cohen testify publicly,,691,,214,,1547172726,,2019-01-10 21:12:06
@cnn,,CNN,,What explains the fascinating radio bursts from outer space | By Don Lincoln, a senior scientist at Fermi National Accelerator Laboratory, via @CNNOpinion https://cnn.it/2D3vtwd pic.twitter.com/KQM6F8CM8t,,explains fascinating radio bursts outer space  lincoln senior scientist fermi national accelerator laboratory via cnnopinion,,178,,89,,1547172692,,2019-01-10 21:11:32
@cnn,,CNN,,Former Trump lawyer Michael Cohen agrees to testify publicly before Congress, the first major move from House Democrats investigating the President https://cnn.it/2Fq5TCX pic.twitter.com/IA5mHFe8Iz,,former trump lawyer michael cohen agrees testify publicly congress first major move house democrats investigating president,,695,,224,,1547172181,,2019-01-10 21:03:01
@cnn,,CNNnewsroom,,"Just to give you a sense, as to what the border is like here...there are some of the steel slats that you hear the President talking about."  @Acosta, from the border in TX, pointing out slats and "chainlink fencing, that you might have in your backyard." http://cnn.it/2QDLpse pic.twitter.com/FzJjiB8iK4,,just give sense border like herethere steel slats hear president talking about  acosta border tx pointing slats chainlink fencing might backyard,,1576,,549,,1547170822,,2019-01-10 20:40:22
@cnn,,CNN,,The drug overdose death rate among women 30 to 64 years old climbed more than 260% from 1999 to 2017, according to a new reporthttps://cnn.it/2D2GL3M ,,drug overdose death rate among women 30 64 years old climbed 260 1999 2017 according new,,175,,102,,1547171707,,2019-01-10 20:55:07
@cnn,,CNN,,Venezuelan President Nicolas Maduro was sworn in for a second term on Thursday amid a longstanding economic crisis and pressure from some Latin American neighbors that won't recognize his presidency after a disputed election https://cnn.it/2D3789F pic.twitter.com/I9rlaLh0c2,,venezuelan president nicolas maduro sworn second term thursday amid longstanding economic crisis pressure latin american neighbors recognize presidency disputed election,,105,,58,,1547171439,,2019-01-10 20:50:39
@cnn,,CNNnewsroom,,CNN’s Brianna Keilar to GOP Rep. Chip Roy, while discussing crime among undocumented immigrants: “How do you disagree with a fact?”pic.twitter.com/ScddBNZRnd,,cnn’s brianna keilar gop rep chip roy discussing crime among undocumented immigrants “how disagree fact”pictwittercomscddbnzrnd,,312,,80,,1547167667,,2019-01-10 19:47:47
@cnni,,cnni,,Kayla, whose husband isn't getting paid today due to the US govt. shutdown, joins Full Circle, along w/ @randikayeCNN, who was with Captain Chesley ‘Sully’ Sullenberger and a group of survivors 10 years after the ‘Miracle on the Hudson.’ Tune in 6:25pET https://cnn.it/2FFOzdx pic.twitter.com/j8yUUlxE9L,,kayla whose husband getting paid today due us govt shutdown joins full circle along w randikayecnn captain chesley ‘sully’ sullenberger group survivors 10 years ‘miracle hudson’ tune 625pet,,19,,4,,1547608862,,2019-01-15 22:21:02
@cnni,,cnni,,Why Gillette's ad slamming toxic masculinity is drawing cheers -- and anger | By @JillFilipovic for @CNNOpinion https://cnn.it/2FBAbms pic.twitter.com/QgaDDi5riD,,gillettes ad slamming toxic masculinity drawing cheers  anger  jillfilipovic cnnopinion,,34,,11,,1547608262,,2019-01-15 22:11:02
@cnni,,cnni,,What happens now with Brexit? British PM Theresa May's big defeat leaves no clear options | Analysis by CNN's @lukemcgee https://cnn.it/2FByDsE pic.twitter.com/im0DPlH8LK,,happens brexit british pm theresa mays big defeat leaves clear options  analysis cnns lukemcgee,,38,,15,,1547607667,,2019-01-15 22:01:07
@cnni,,cnni,,Women could boost the global economy, but outdated laws are holding them back, write Jamille Bigio and Rachel Vogelstein for @CNNBusiness Perspectives https://cnn.it/2FFL1bd pic.twitter.com/Rj5Iidws2J,,women could boost global economy outdated laws holding back write jamille bigio rachel vogelstein cnnbusiness perspectives,,30,,10,,1547607062,,2019-01-15 21:51:02
@cnni,,cnni,,"This was a scale of defeat that doubled the prediction of even the worst predicted defeat." -CNN's @camanpour on British PM Theresa May's Brexit deal failure https://cnn.it/2Fvmwhz pic.twitter.com/hZoFDjj7T0,,this scale defeat doubled prediction even worst predicted defeat cnns camanpour british pm theresa mays brexit deal failure,,45,,29,,1547606700,,2019-01-15 21:45:00
@cnni,,cnni,,Former Pepsi CEO tops White House shortlist for World Bank https://cnn.it/2DcMPqi pic.twitter.com/cHQYUlEczS,,former pepsi ceo tops white house shortlist world bank,,27,,12,,1547606464,,2019-01-15 21:41:04
@cnni,,cnni,,How to keep AI from turning into the Terminator https://cnn.it/2FByi9l  (via @CNNOpinion)pic.twitter.com/SdImMPJbgu,,keep ai turning terminator via cnnopinionpictwittercomsdimmpjbgu,,23,,8,,1547605865,,2019-01-15 21:31:05
@cnni,,cnni,,Theresa May's full statement to the House of Commons in the immediate aftermath of her historic #BrexitVote defeat:https://cnn.it/2FyfPui ,,theresa mays full statement house commons immediate aftermath historic brexitvote,,39,,16,,1547603587,,2019-01-15 20:53:07
@cnni,,cnni,,The British pound shrugged off #BrexitVotehttps://cnn.it/2FCy29Z ,,british pound shrugged,,31,,14,,1547602953,,2019-01-15 20:42:33
@cnni,,CNNnewsroom,,"This was a scale of defeat that doubled the prediction of even the worst predicted." Chief International Anchor @camanpour on Theresa May's Brexit deal failure https://cnn.it/2VSnPfi pic.twitter.com/0SbnnPWAfh,,this scale defeat doubled prediction even worst predicted chief international anchor camanpour theresa mays brexit deal failure,,169,,86,,1547601695,,2019-01-15 20:21:35
@cnni,,cnni,,Tonight's #BrexitVote in Parliament is the biggest defeat for any British government in modern history. The previous record was a 166-vote loss in 1924.  118 Conservative MPs voted against Prime Minister Theresa May -- a massive rebellion.https://cnn.it/2FywSMS ,,tonights brexitvote parliament biggest defeat british government modern history previous record 166vote loss 1924  118 conservative mps voted prime minister theresa may  massive,,298,,245,,1547601993,,2019-01-15 20:26:33
@cnni,,cnni,,After #BrexitVote, the President of the European Commission warns the UK, "time is almost up."https://cnn.it/2DbEQtz ,,brexitvote president european commission warns uk time almost,,175,,105,,1547601310,,2019-01-15 20:15:10
@cnni,,cnni,,After a defeat for Theresa May's Brexit deal, possible scenarios include: attempted renegotiation with the EU, extending article 50, general election, change of prime minister, second EU referendum, scrapping Brexit altogether, or crashing out with no dealhttps://cnn.it/2DclmoI ,,defeat theresa mays brexit deal possible scenarios include attempted renegotiation eu extending article 50 general election change prime minister second eu referendum scrapping brexit altogether crashing,,191,,157,,1547600817,,2019-01-15 20:06:57
@cnni,,cnni,,Just after Theresa May's Brexit deal is crushed by a record margin, opposition leader Jeremy Corbyn confirms he has put forward a no-confidence vote in the government https://cnn.it/2FuuRCe  #BrexitVotepic.twitter.com/wPqA5xg9Km,,theresa mays brexit deal crushed record margin opposition leader jeremy corbyn confirms put forward noconfidence vote government brexitvotepictwittercomwpqa5xg9km,,126,,84,,1547600283,,2019-01-15 19:58:03
@cnni,,cnni,,The #BrexitVote result is the worst parliamentary defeat for a British government in the modern erahttps://cnn.it/2Db8dMP ,,brexitvote result worst parliamentary defeat british government modern,,926,,663,,1547599848,,2019-01-15 19:50:48
@cnni,,cnni,,R. Kelly is accused of threatening one of his alleged victims https://cnn.it/2FBM6kg pic.twitter.com/Csm1mK5msa,,r kelly accused threatening one alleged victims,,28,,19,,1547599810,,2019-01-15 19:50:10
@cnni,,cnni,,BREAKING NEWS: Theresa May's Brexit plan is crushed by 432 votes to 202 in Parliament -- a record margin https://cnn.it/2RKTwbn pic.twitter.com/nS7PLu9869,,breaking news theresa mays brexit plan crushed 432 votes 202 parliament  record margin,,317,,252,,1547599455,,2019-01-15 19:44:15
@cnni,,cnni,,The tool considers factors like family history, genetics, weight, alcohol consumption, age at menopause and use of hormone replacement therapy to help determine riskhttps://cnn.it/2FyqqWa ,,tool considers factors like family history genetics weight alcohol consumption age menopause use hormone replacement therapy help determine,,39,,18,,1547599253,,2019-01-15 19:40:53
[truncated: 13,154,955 more chars]
