# Supplementary material
Source: ML conference proceedings conference paper supplement (https://proceedings.neurips.cc/paper_files/paper/2022/hash/6faf3b8ed0df532c14d0fc009e451b6d-Abstract.html)
Supplement: Supplementary file 1 [file 6faf3b8ed0df532c14d0fc009e451b6d-Supplemental-Conference.zip › codes/dataset/wiki.txt]

30	1412
30	3352
30	5254
30	5543
30	7478
3	28
3	30
3	39
3	54
3	108
3	152
3	178
3	182
3	214
3	271
3	286
3	300
3	348
3	349
3	371
3	567
3	581
3	584
3	586
3	590
3	604
3	611
3	8283
25	3
25	6
25	8
25	19
25	23
25	28
25	29
25	30
25	33
25	35
25	50
25	54
25	55
25	75
25	80
25	86
25	94
25	127
25	152
25	154
25	182
25	192
25	214
25	224
25	226
25	246
25	252
25	255
25	257
25	261
25	271
25	273
25	280
25	282
25	286
25	299
25	300
25	302
25	306
25	308
25	310
25	322
25	325
25	339
25	348
25	349
25	356
25	358
25	363
25	370
25	371
25	373
25	377
25	379
25	407
25	415
25	422
25	428
25	439
25	488
25	514
25	545
25	549
25	560
25	590
25	592
25	600
25	604
25	611
25	645
25	650
25	659
25	664
25	667
25	673
25	675
25	696
25	706
25	723
25	739
25	756
25	857
25	864
25	893
25	959
25	994
25	1131
25	3755
25	8282
25	8284
4	8
4	10
4	28
4	30
4	38
4	55
4	56
4	75
4	130
4	140
4	147
4	151
4	152
4	214
4	232
4	243
4	282
4	299
4	341
4	363
4	370
4	415
4	560
4	606
4	611
4	645
4	650
4	659
4	8282
5	6
5	8
5	10
5	23
5	30
5	33
5	38
5	50
5	54
5	55
5	61
5	75
5	89
5	93
5	127
5	130
5	147
5	153
5	163
5	167
5	168
5	175
5	299
6	3
6	8
6	10
6	19
6	23
6	28
6	29
6	30
6	33
6	34
6	35
6	38
6	39
6	50
6	54
6	55
6	56
6	61
6	80
6	86
6	89
6	93
6	94
6	127
6	130
6	132
6	135
6	140
6	147
6	151
6	153
6	154
6	163
6	167
6	168
6	171
6	175
6	178
6	182
6	183
6	216
6	219
6	226
6	227
6	228
6	232
6	236
6	243
6	250
6	252
6	257
6	258
6	259
6	261
6	271
6	273
6	274
6	280
6	285
6	286
6	290
6	298
6	299
6	300
6	301
6	304
6	306
6	317
6	319
6	322
6	325
6	339
6	348
6	349
6	356
6	358
6	359
6	362
6	363
6	370
6	371
6	373
6	377
6	378
6	379
6	390
6	391
6	392
6	394
6	396
6	402
6	405
6	406
6	407
6	415
6	421
6	422
6	427
6	428
6	431
6	432
6	433
6	435
6	439
6	440
6	447
6	538
6	545
6	549
6	560
6	564
6	566
6	567
6	579
6	581
6	584
6	586
6	589
6	590
6	592
6	600
6	604
6	609
6	611
6	613
6	616
6	617
6	619
6	643
6	656
6	659
6	665
6	668
6	673
6	691
6	694
6	700
6	704
6	717
6	723
6	730
6	733
6	739
6	741
6	761
6	765
6	779
6	789
6	791
6	798
6	802
6	813
6	820
6	826
6	857
6	863
6	871
6	881
6	885
6	893
6	895
6	897
6	904
6	906
6	907
6	913
6	922
6	932
6	936
6	955
6	960
6	963
6	966
6	971
6	972
6	978
6	979
6	983
6	991
6	993
6	995
6	1007
6	1014
6	1022
6	1026
6	1032
6	1035
6	1043
6	1055
6	1062
6	1125
6	1144
6	1152
6	1156
6	1160
6	1167
6	1168
6	1218
6	1220
6	1221
6	1222
6	1234
6	1241
6	1248
6	1253
6	1261
6	1297
6	1321
6	1326
6	1377
6	1389
6	1390
6	1394
6	1396
6	1428
6	1439
6	1441
6	1442
6	1446
6	1453
6	1464
6	1465
6	1468
6	1471
6	1472
6	1476
6	1478
6	1484
6	1485
6	1487
6	1489
6	1490
6	1497
6	1501
6	1506
6	1507
6	1513
6	1514
6	1518
6	1524
6	1525
6	1531
6	1532
6	1533
6	1538
6	1549
6	1555
6	1556
6	1557
6	1563
6	1569
6	1573
6	1587
6	1597
6	1610
6	1619
6	1641
6	1648
6	1652
6	1654
6	1657
6	1662
6	1669
6	1679
6	1689
6	1692
6	1701
6	1716
6	1718
6	1752
6	1758
6	1768
6	1774
6	1783
6	1787
6	1788
6	1798
6	1861
6	1864
6	1982
6	2409
6	2651
6	2843
6	2909
6	3755
6	3892
6	4037
6	4134
6	4792
6	4942
6	5323
6	5697
6	6227
6	6330
6	6624
6	6765
6	6790
6	6965
6	7161
6	7632
6	8282
6	8290
7	6
7	28
7	30
7	32
7	35
7	38
7	54
7	55
7	61
7	75
7	93
7	105
7	228
7	259
7	271
7	299
7	524
7	1190
7	1193
7	1425
7	1471
7	1919
7	8283
7	8287
8	6
8	10
8	19
8	23
8	28
8	30
8	33
8	34
8	36
8	39
8	49
8	50
8	54
8	55
8	56
8	61
8	75
8	80
8	86
8	89
8	127
8	130
8	132
8	135
8	140
8	144
8	150
8	151
8	152
8	153
8	154
8	163
8	167
8	168
8	175
8	178
8	182
8	183
8	192
8	214
8	216
8	219
8	224
8	226
8	232
8	236
8	243
8	250
8	252
8	255
8	258
8	261
8	271
8	273
8	274
8	280
8	282
8	286
8	299
8	300
8	301
8	308
8	310
8	319
8	322
8	339
8	341
8	348
8	349
8	356
8	358
8	362
8	363
8	370
8	371
8	373
8	377
8	378
8	379
8	389
8	390
8	391
8	392
8	394
8	396
8	402
8	405
8	406
8	415
8	421
8	422
8	427
8	428
8	431
8	432
8	433
8	435
8	439
8	440
8	488
8	506
8	514
8	524
8	538
8	549
8	560
8	564
8	566
8	567
8	581
8	584
8	586
8	587
8	589
8	590
8	592
8	600
8	604
8	606
8	607
8	609
8	611
8	613
8	616
8	617
8	622
8	624
8	627
8	628
8	631
8	636
8	637
8	645
8	650
8	656
8	657
8	658
8	659
8	664
8	665
8	667
8	668
8	673
8	674
8	675
8	677
8	681
8	687
8	706
8	715
8	719
8	723
8	725
8	739
8	741
8	749
8	756
8	760
8	761
8	778
8	779
8	798
8	802
8	806
8	810
8	817
8	822
8	844
8	857
8	864
8	866
8	868
8	875
8	878
8	881
8	882
8	885
8	936
8	938
8	977
8	1092
8	8284
9	8
9	10
9	23
9	28
9	30
9	33
9	34
9	54
9	55
9	56
9	61
9	75
9	80
9	86
9	94
9	130
9	135
9	144
9	151
9	168
9	214
9	226
9	228
9	243
9	250
9	258
9	261
9	271
9	274
9	299
9	325
9	339
9	348
9	356
9	363
9	370
9	377
9	378
9	379
9	390
9	391
9	392
9	394
9	402
9	421
9	422
9	427
9	431
9	439
9	440
9	506
9	517
9	559
9	560
9	579
9	592
9	611
9	626
9	658
9	664
9	715
9	733
9	756
9	857
9	868
9	893
9	904
9	918
9	932
9	972
9	982
9	1049
9	1103
9	1384
9	1525
9	1580
9	1618
9	1652
9	1717
9	1855
9	1966
10	3
10	6
10	8
10	19
10	23
10	28
10	30
10	33
10	34
10	38
10	50
10	54
10	89
10	93
10	105
10	130
10	132
10	135
10	147
10	153
10	154
10	163
10	168
10	175
10	183
10	214
10	216
10	219
10	246
10	250
10	252
10	255
10	257
10	261
10	271
10	274
10	280
10	286
10	300
10	301
10	306
10	310
10	319
10	405
10	406
10	407
10	432
10	549
10	587
10	600
10	609
10	617
10	619
10	622
10	627
10	628
10	631
10	636
10	656
10	657
10	658
10	659
10	664
10	665
10	667
10	668
10	673
10	675
10	681
10	700
10	706
10	715
10	719
10	725
10	739
10	741
10	743
10	746
10	748
10	750
10	756
10	760
10	761
10	765
10	778
10	779
11	6
11	8
11	10
11	15
11	19
11	23
11	28
11	29
11	30
11	33
11	34
11	35
11	36
11	38
11	49
11	50
11	54
11	55
11	56
11	61
11	72
11	75
11	86
11	89
11	93
11	95
11	105
11	127
11	130
11	132
11	147
11	151
11	153
11	154
11	163
11	168
11	171
11	178
11	183
11	192
11	204
11	214
11	216
11	219
11	224
11	227
11	228
11	230
11	246
11	250
11	252
11	255
11	257
11	259
11	261
11	271
11	274
11	282
11	285
11	286
11	298
11	299
11	306
11	308
11	310
11	313
11	317
11	319
11	322
11	325
11	332
11	334
11	338
11	350
11	372
11	406
11	407
11	415
11	429
11	431
11	432
11	439
11	440
11	465
11	488
11	506
11	514
11	545
11	549
11	559
11	560
11	575
11	579
11	587
11	600
11	607
11	608
11	609
11	611
11	613
11	617
11	622
11	624
11	627
11	628
11	631
11	636
11	637
11	643
11	644
11	647
11	658
11	659
11	664
11	667
11	668
11	673
11	674
11	675
11	677
11	681
11	684
11	687
11	694
11	700
11	705
11	706
11	707
11	710
11	715
11	717
11	719
11	722
11	723
11	725
11	730
11	733
11	739
11	741
11	743
11	744
11	746
11	748
11	749
11	750
11	756
11	760
11	761
11	762
11	763
11	764
11	765
11	771
11	779
11	791
11	793
11	798
11	802
11	803
11	805
11	806
11	810
11	817
11	822
11	825
11	826
11	829
11	836
11	837
11	838
11	839
11	844
11	849
11	853
11	857
11	859
11	863
11	864
11	866
11	868
11	871
11	873
11	878
11	881
11	882
11	885
11	887
11	893
11	895
11	904
11	907
11	908
11	913
11	918
11	922
11	929
11	932
11	934
11	935
11	936
11	937
11	941
11	942
11	943
11	945
11	946
11	947
11	955
11	956
11	958
11	959
11	960
11	963
11	968
11	971
11	975
11	978
11	982
11	985
11	989
11	993
11	994
11	999
11	1000
11	1006
11	1012
11	1018
11	1022
11	1031
11	1032
11	1034
11	1035
11	1049
11	1055
11	1061
11	1062
11	1075
11	1080
11	1092
11	1097
11	1103
11	1111
11	1124
11	1127
11	1128
11	1137
11	1144
11	1151
11	1154
11	1156
11	1160
11	1164
11	1165
11	1167
11	1168
11	1185
11	1186
11	1190
11	1191
11	1193
11	1196
11	1199
11	1200
11	1201
11	1203
11	1211
11	1218
11	1220
11	1221
11	1222
11	1230
11	1239
11	1241
11	1243
11	1248
11	1250
11	1253
11	1259
11	1260
11	1261
11	1279
11	1282
11	1284
11	1285
11	1286
11	1296
11	1297
11	1305
11	1307
11	1310
11	1319
11	1321
11	1322
11	1326
11	1330
11	1353
11	1360
11	1372
11	1374
11	1375
11	1377
11	1378
11	1382
11	1384
11	1385
11	1389
11	1390
11	1394
11	1396
11	1402
11	1407
11	1411
11	1412
11	1413
11	1418
11	1420
11	1425
11	1428
11	1435
11	1437
11	1439
11	1441
11	1442
11	1444
11	1446
11	1453
11	1464
11	1465
11	1468
11	1471
11	1476
11	1482
11	1484
11	1485
11	1486
11	1487
11	1489
11	1490
11	1492
11	1496
11	1497
11	1501
11	1506
11	1507
11	1513
11	1514
11	1518
11	1520
11	1521
11	1524
11	1525
11	1531
11	1532
11	1533
11	1534
11	1538
11	1542
11	1547
11	1549
11	1550
11	1555
11	1556
11	1557
11	1565
11	1566
11	1583
11	1585
11	1592
11	1608
11	1610
11	1613
11	1619
11	1621
11	1622
11	1628
11	1629
11	1633
11	1637
11	1638
11	1641
11	1646
11	1648
11	1649
11	1652
11	1653
11	1654
11	1657
11	1658
11	1661
11	1662
11	1669
11	1672
11	1679
11	1680
11	1687
11	1688
11	1689
11	1692
11	1697
11	1700
11	1701
11	1706
11	1707
11	1714
11	1716
11	1717
11	1718
11	1726
11	1729
11	1730
11	1732
11	1746
11	1747
11	1749
11	1752
11	1757
11	1758
11	1768
11	1769
11	1771
11	1772
11	1774
11	1780
11	1783
11	1787
11	1788
11	1791
11	1798
11	1802
11	1805
11	1811
11	1816
11	1835
11	1836
11	1842
11	1847
11	1848
11	1849
11	1855
11	1857
11	1858
11	1859
11	1861
11	1864
11	1880
11	1884
11	1888
11	1893
11	1901
11	1903
11	1908
11	1919
11	1920
11	1927
11	1953
11	1956
11	1963
11	1964
11	1965
11	1966
11	1969
11	1973
11	1977
11	1979
11	1983
11	1985
11	1987
11	1990
11	1991
11	1992
11	1997
11	2004
11	2007
11	2014
11	2055
11	2060
11	2062
11	2066
11	2071
11	2073
11	2076
11	2079
11	2085
11	2091
11	2095
11	2097
11	2101
11	2109
11	2114
11	2117
11	2119
11	2128
11	2134
11	2137
11	2144
11	2145
11	2151
11	2157
11	2168
11	2178
11	2181
11	2182
11	2193
11	2202
11	2205
11	2206
11	2210
11	2237
11	2240
11	2241
11	2246
11	2252
11	2253
11	2257
11	2273
11	2289
11	2294
11	2328
11	2329
11	2332
11	2333
11	2339
11	2341
11	2345
11	2350
11	2362
11	2364
11	2381
11	2384
11	2385
11	2397
11	2400
11	2409
11	2410
11	2411
11	2426
11	2435
11	2456
11	2470
11	2475
11	2479
11	2484
11	2485
11	2490
11	2499
11	2504
11	2506
11	2508
11	2517
11	2535
11	2544
11	2565
11	2570
11	2575
11	2579
11	2580
11	2585
11	2587
11	2593
11	2595
11	2604
11	2612
11	2619
11	2625
11	2643
11	2646
11	2653
11	2655
11	2657
11	2665
11	2669
11	2685
11	2686
11	2696
11	2720
11	2727
11	2746
11	2754
11	2760
11	2763
11	2775
11	2777
11	2787
11	2794
11	2811
11	2843
11	2859
11	2871
11	2900
11	2923
11	2932
11	2958
11	2981
11	3002
11	3005
11	3007
11	3010
11	3014
11	3024
11	3026
11	3028
11	3034
11	3059
11	3073
11	3084
11	3092
11	3114
11	3117
11	3125
11	3136
11	3140
11	3144
11	3180
11	3192
11	3258
11	3260
11	3284
11	3291
11	3309
11	3321
11	3334
11	3352
11	3394
11	3404
11	3433
11	3439
11	3443
11	3447
11	3452
11	3453
11	3454
11	3458
11	3463
11	3464
11	3480
11	3529
11	3537
11	3557
11	3562
11	3568
11	3607
11	3615
11	3631
11	3635
11	3645
11	3650
11	3660
11	3661
11	3680
11	3748
11	3755
11	3787
11	3800
11	3806
11	3807
11	3812
11	3830
11	3843
11	3847
11	3871
11	3892
11	3903
11	3926
11	3937
11	3956
11	3958
11	3967
11	3970
11	4011
11	4013
11	4021
11	4024
11	4040
11	4043
11	4044
11	4055
11	4058
11	4065
11	4072
11	4088
11	4103
11	4124
11	4162
11	4179
11	4201
11	4212
11	4231
11	4247
11	4256
11	4261
11	4263
11	4266
11	4269
11	4289
11	4290
11	4297
11	4299
11	4335
11	4384
11	4417
11	4422
11	4424
11	4463
11	4485
11	4510
11	4528
11	4531
11	4547
11	4578
11	4613
11	4661
11	4662
11	4706
11	4709
11	4719
11	4796
11	4808
11	4811
11	4814
11	4820
11	4827
11	4938
11	4962
11	5026
11	5037
11	5055
11	5073
11	5092
11	5100
11	5106
11	5130
11	5132
11	5144
11	5802
11	6170
11	6496
11	6715
11	6739
11	8286
11	8287
11	8290
11	8291
11	8293
12	8
12	28
12	30
12	56
12	72
12	80
12	214
12	219
12	232
12	236
12	250
12	255
12	257
12	259
12	274
12	282
12	286
12	290
12	299
12	349
12	356
12	362
12	390
12	407
12	427
12	428
12	432
12	435
12	538
12	564
12	609
12	631
12	644
12	663
12	668
12	675
12	677
12	697
12	706
12	725
12	748
12	756
12	765
12	793
12	805
12	810
12	822
12	838
12	857
12	937
12	1014
12	1160
12	1241
12	1297
12	1464
12	1573
12	1629
12	1638
12	2252
12	2708
12	3371
12	3843
12	4233
12	8287
12	8291
13	28
13	30
13	178
13	214
13	216
13	232
13	250
13	252
13	271
13	302
13	341
14	3
14	10
14	23
14	28
14	30
14	32
14	49
14	54
14	55
14	56
14	61
14	75
14	95
14	127
14	130
14	140
14	150
14	152
14	178
14	182
14	183
14	192
14	214
14	216
14	219
14	224
14	226
14	236
14	250
14	259
14	261
14	271
14	282
14	299
14	324
14	325
14	338
14	356
14	363
14	368
14	371
14	377
14	378
14	390
14	391
14	394
14	396
14	402
14	421
14	422
14	427
14	440
14	477
14	517
14	524
14	538
14	560
14	564
14	566
14	567
14	581
14	584
14	589
14	609
14	611
14	613
14	616
14	617
14	619
14	626
14	631
14	650
14	656
14	665
14	797
14	968
14	1031
14	1053
14	1080
14	1123
14	1164
14	1259
14	1307
14	1385
14	1496
14	1717
14	1835
14	1842
14	1855
14	1864
14	1927
14	1966
14	2016
14	2066
14	2117
14	2134
14	2193
14	2339
14	2384
14	2470
14	2475
14	2479
14	2565
14	2587
14	2595
14	2643
14	2653
14	3192
14	3562
14	4055
14	4179
14	4247
14	8285
14	8287
15	8
15	23
15	28
15	30
15	32
15	33
15	38
15	49
15	54
15	55
15	56
15	61
15	95
15	105
15	152
15	214
15	299
15	368
15	417
15	477
15	560
15	589
15	600
15	667
15	737
15	756
15	762
15	893
15	974
15	1006
15	1297
15	1717
15	2066
15	2144
15	2229
15	2398
15	2643
15	2651
15	3005
15	3334
15	3755
15	4037
15	4561
15	4600
15	4645
15	4658
15	7632
15	7871
15	8287
15	8292
16	28
16	30
16	637
16	749
16	789
16	817
16	857
16	887
16	982
16	993
16	1186
16	1374
16	1412
16	1580
16	1672
17	3
17	8
17	10
17	28
17	30
17	32
17	33
17	35
17	50
17	54
17	55
17	95
17	108
17	127
17	135
17	183
17	214
17	258
17	261
17	271
17	273
17	282
17	299
17	339
17	356
17	359
17	377
17	378
17	391
17	524
17	590
17	592
17	624
17	656
17	658
17	667
17	675
17	739
17	750
17	756
17	941
17	982
17	1190
17	1218
17	1513
18	30
18	36
18	55
18	144
18	192
18	214
18	308
18	429
18	477
18	549
18	643
18	2570
19	3
19	6
19	23
19	28
19	30
19	33
19	38
19	50
19	54
19	55
19	61
19	89
19	127
19	130
19	132
19	151
19	154
19	163
19	168
19	182
19	183
19	214
19	216
19	219
19	250
19	252
19	257
19	261
19	271
19	274
19	286
19	299
19	371
19	564
19	581
19	584
19	589
19	590
19	592
20	3
20	6
20	19
20	30
20	33
20	34
20	36
20	50
20	54
20	55
20	56
20	61
20	75
20	80
20	89
20	105
20	132
20	135
20	140
20	151
20	153
20	167
20	168
20	182
20	183
20	214
20	216
20	224
20	232
20	243
20	250
20	252
20	255
20	257
20	258
20	261
20	271
20	274
20	282
20	286
20	299
20	306
20	308
20	310
20	321
20	322
20	325
20	339
20	348
20	350
20	363
20	368
20	370
20	371
20	377
20	378
20	379
20	391
20	402
20	405
20	425
[truncated: 101,689 more rows]
