# Supplementary material
Source: ML conference proceedings conference paper supplement (https://proceedings.neurips.cc/paper_files/paper/2022/hash/6faf3b8ed0df532c14d0fc009e451b6d-Abstract.html)
Supplement: Supplementary file 1 [file 6faf3b8ed0df532c14d0fc009e451b6d-Supplemental-Conference.zip › codes/dataset/yelp_data.csv]

city	dist_downtown	dist_ariport	dist_meausem	latitude	longitude	name	state	full_address	Number_of_Checkins	Number_of_Tips	Number_of_Tip_Likes	Noise Level	Alcohol	Attire	Wi_Fi	Price_Range	Smoking	Delivery	Outdoor_Seating	Drive-Thru	Good_for_Groups	Has_TV	Caters	Waiter_Service	Good_for_Kids	Accepts_Credit_Cards	Takes_Reservations	Happy_Hour	Good_for_Dancing	BYOB	Corkage	Take_Out	Coat_Check	Parking_Street	Parking_Valet	Parking_Lot	Parking_Garage	Parking_Validated	Music_DJ	Music_Karaoke	Music_Video	Music_Live	Music_Jukebox	Music_Background_Music	Is_Restaurants	Sandwiches	Fast Food	Nightlife	Pizza
Phoenix	9.194538189950025	4.300707508418946	10.510804192034211	33.399529	-111.99766899999999	Trans-West Network Solutions	AZ	5202 S 39th St Phoenix, AZ 85040	0.0	0.6931471805599453	0.0	0	2	0	1	0	0	0.0	0.0	0.0	0.0	0.0	0.0	0.0	0.0	0.0	0.0	0.0	0.0	0.0	0.0	0.0	0.0	0.0	0.0	0.0	0.0	0.0	0.0	0.0	0.0	0.0	0.0	0.0	0	0	0	0	0
Edinburgh	1.3980898822262815	9.64923883396341	0.5118292837602653	55.945977799999994	-3.2065095	Rainbow Arch Restaurant	EDH	8-16a Morrison Street West End Edinburgh EH3 8BJ	1.6094379124341003	0.6931471805599453	0.0	0	2	0	1	0	0	0.0	0.0	0.0	0.0	0.0	0.0	1.0	1.0	1.0	0.0	0.0	0.0	0.0	0.0	0.0	0.0	0.0	0.0	0.0	0.0	0.0	0.0	0.0	0.0	0.0	0.0	0.0	1	0	0	0	0
Phoenix	8.079057713870062	4.968005164767732	6.542592566310606	33.4808693	-111.9948624	BBVA Compass Bank	AZ	4010 E Thomas Rd Phoenix, AZ 85018	3.1780538303479458	1.0986122886681098	0.0	0	2	0	1	0	0	0.0	0.0	0.0	0.0	0.0	0.0	0.0	0.0	0.0	0.0	0.0	0.0	0.0	0.0	0.0	0.0	0.0	0.0	0.0	0.0	0.0	0.0	0.0	0.0	0.0	0.0	0.0	0	0	0	0	0
Phoenix	3.169436886841618	8.14065872445553	1.3859295927113455	33.4800317	-112.07894820000001	Arizona Balance & Hearing Associates	AZ	333 W Thomas Rd Ste 208A Phoenix, AZ 85013	0.0	0.0	0.0	0	2	0	1	0	0	0.0	0.0	0.0	0.0	0.0	0.0	0.0	0.0	0.0	0.0	0.0	0.0	0.0	0.0	0.0	0.0	0.0	0.0	0.0	0.0	0.0	0.0	0.0	0.0	0.0	0.0	0.0	0	0	0	0	0
Madison	8.252528867453353	11.144901577498867	9.054160813585543	43.048319299999996	-89.2980993	Veterinary Emergency Service	WI	4902 E Broadway Madison, WI 53716	0.0	0.6931471805599453	0.0	0	2	0	1	0	0	0.0	0.0	0.0	0.0	0.0	0.0	0.0	0.0	0.0	0.0	0.0	0.0	0.0	0.0	0.0	0.0	0.0	0.0	0.0	0.0	0.0	0.0	0.0	0.0	0.0	0.0	0.0	0	0	0	0	0
Las Vegas	10.149467680005268	18.714333540892547	16.103672114216216	36.25839335383839	-115.14255523681601	Scapes and Stones	NV	3270 N Rancho Dr Ste 103 Las Vegas, NV 89031	0.0	0.0	0.0	0	2	0	1	0	0	0.0	0.0	0.0	0.0	0.0	0.0	0.0	0.0	1.0	0.0	0.0	0.0	0.0	0.0	0.0	0.0	0.0	0.0	0.0	0.0	0.0	0.0	0.0	0.0	0.0	0.0	0.0	0	0	0	0	0
Las Vegas	0.8367591726027958	9.418908158707447	7.260155378520428	36.1745516	-115.1370274	Taqueria El Buen Pastor	NV	530 N Las Vegas Blvd Las Vegas, NV 89101	5.327876168789581	3.295836866004329	0.6931471805599453	0	2	0	1	0	0	0.0	0.0	0.0	1.0	0.0	0.0	0.0	1.0	1.0	0.0	0.0	0.0	0.0	0.0	1.0	0.0	1.0	0.0	0.0	0.0	0.0	0.0	0.0	0.0	0.0	0.0	0.0	1	0	0	0	0
Phoenix	5.195653603447586	7.731708914860351	2.403364796667532	33.495282	-112.054005	Perfect Timing Entertainment	AZ	4113 N Longview Ave Phoenix, AZ 85014	4.736198448394496	2.5649493574615367	0.0	0	2	0	1	0	0	0.0	0.0	0.0	0.0	0.0	0.0	0.0	1.0	1.0	0.0	0.0	0.0	0.0	0.0	0.0	0.0	0.0	0.0	0.0	0.0	0.0	0.0	0.0	0.0	0.0	0.0	0.0	0	0	0	0	0
Phoenix	6.199493167525658	12.478238124320686	6.220634689247971	33.480499699999996	-112.13165690000001	Michael Rogers Flooring	AZ	3338 W. Thomas Rd Phoenix, AZ 85017	0.0	0.0	0.0	0	2	0	1	0	0	0.0	0.0	0.0	0.0	0.0	0.0	0.0	0.0	1.0	0.0	0.0	0.0	0.0	0.0	0.0	0.0	0.0	0.0	0.0	0.0	0.0	0.0	0.0	0.0	0.0	0.0	0.0	0	0	0	0	0
Las Vegas	12.138368898736816	5.895592476562853	5.565519884743417	36.0724995	-115.2033057	DirectBuy of Las Vegas	NV	6420 Cameron St Ste 200 Las Vegas, NV 89118	2.995732273553991	1.0986122886681098	0.0	0	2	0	1	1	0	0.0	0.0	0.0	0.0	0.0	0.0	0.0	0.0	1.0	0.0	0.0	0.0	0.0	0.0	0.0	0.0	1.0	0.0	0.0	0.0	0.0	0.0	0.0	0.0	0.0	0.0	0.0	0	0	0	0	0
Phoenix	25.51441942212176	26.871353785976236	22.755132723705326	33.6788573	-112.03115929999998	Desert Gardens Nursery	AZ	21222 N Cave Creek Rd Phoenix, AZ 85024	3.258096538021482	1.0986122886681098	0.0	0	2	0	1	1	0	0.0	0.0	0.0	0.0	0.0	0.0	0.0	0.0	1.0	0.0	0.0	0.0	0.0	0.0	0.0	0.0	0.0	0.0	1.0	0.0	0.0	0.0	0.0	0.0	0.0	0.0	0.0	0	0	0	0	0
Edinburgh	4.513658374457378	15.179327234796679	5.260305663629266	55.95370749999999	-3.1160157	Fine Wine Company	EDH	119 Portobello High St Edinburgh EH15 1AR	0.0	0.0	0.0	0	2	0	1	2	0	0.0	0.0	0.0	0.0	0.0	0.0	0.0	0.0	1.0	0.0	0.0	0.0	0.0	0.0	0.0	0.0	0.0	0.0	0.0	0.0	0.0	0.0	0.0	0.0	0.0	0.0	0.0	0	0	0	0	0
Charlotte	5.809478789744792	26.27792395410398	4.497152662447789	35.170446999999996	-80.847942	Washbowl Cleaners	NC	1700 Montford Dr South Park Charlotte, NC 28209	3.4011973816621555	0.0	0.0	0	2	0	1	0	0	0.0	0.0	0.0	0.0	0.0	0.0	0.0	0.0	0.0	0.0	0.0	0.0	0.0	0.0	0.0	0.0	0.0	0.0	0.0	0.0	0.0	0.0	0.0	0.0	0.0	0.0	0.0	0	0	0	0	0
Phoenix	6.856055181290159	7.824399117536821	9.512315289448843	33.39	-112.07	Bullseye Painting, LLC	AZ	Phoenix, AZ 85066	0.0	0.0	0.0	0	2	0	1	0	0	0.0	0.0	0.0	0.0	0.0	0.0	0.0	0.0	1.0	0.0	0.0	0.0	0.0	0.0	0.0	0.0	0.0	0.0	0.0	0.0	0.0	0.0	0.0	0.0	0.0	0.0	0.0	0	0	0	0	0
Las Vegas	13.584799962333744	21.38867388374048	18.04943648494384	36.2750372	-115.2069003	Rain Salon Studios	NV	6575 N Decatur Blvd Centennial Las Vegas, NV 89131	3.784189633918261	2.70805020110221	0.6931471805599453	0	2	0	1	1	0	0.0	0.0	0.0	0.0	0.0	0.0	0.0	1.0	1.0	0.0	0.0	0.0	0.0	0.0	0.0	0.0	0.0	0.0	1.0	0.0	0.0	0.0	0.0	0.0	0.0	0.0	0.0	0	0	0	0	0
Phoenix	8.415960066586699	12.564367083866573	11.075599699083929	33.393128499999996	-112.13202779999999	Jumbo Buffet	AZ	3414 W Southern Ave Phoenix, AZ 85041	4.04305126783455	2.1972245773362196	0.0	1	0	0	1	0	0	0.0	0.0	0.0	1.0	0.0	0.0	1.0	1.0	1.0	0.0	0.0	0.0	0.0	0.0	1.0	0.0	0.0	0.0	0.0	0.0	0.0	0.0	0.0	0.0	0.0	0.0	0.0	1	0	0	0	0
Las Vegas	6.9941230998227715	6.310195080752245	2.5288771479695535	36.126413299999996	-115.19495649999999	Sushi Moto	NV	4115 Spring Mountain Rd Ste 101 Chinatown Las Vegas, NV 89102	0.0	0.0	0.0	0	2	0	1	1	0	0.0	0.0	0.0	1.0	0.0	0.0	0.0	0.0	1.0	0.0	0.0	0.0	0.0	0.0	0.0	0.0	0.0	0.0	0.0	0.0	0.0	0.0	0.0	0.0	0.0	0.0	0.0	1	0	0	0	0
Phoenix	0.3206770330274329	6.2798400287026155	3.083308109240498	33.4488663	-112.0738152	The Counter Phoenix	AZ	50 N Central Ave Phoenix, AZ 85004	4.663439094112067	1.791759469228055	0.0	0	1	0	0	1	0	0.0	1.0	0.0	1.0	1.0	0.0	1.0	1.0	1.0	0.0	0.0	0.0	0.0	0.0	1.0	0.0	0.0	0.0	0.0	1.0	0.0	0.0	0.0	0.0	0.0	0.0	0.0	1	0	0	0	0
Las Vegas	10.857149669565835	15.399451144476506	11.560372919783447	36.1965014325969	-115.25071580813999	Five Guys Burgers and Fries	NV	7290 W Lake Mead Blvd Las Vegas, NV 89128	6.042632833682381	3.6375861597263857	0.0	0	2	0	1	0	0	0.0	1.0	0.0	1.0	0.0	0.0	0.0	1.0	1.0	0.0	0.0	0.0	0.0	0.0	1.0	0.0	0.0	0.0	1.0	0.0	0.0	0.0	0.0	0.0	0.0	0.0	0.0	1	0	1	0	0
Pittsburgh	4.9039136799059575	24.80062157119153	39.25843184617174	40.4609914	-79.9483345	Junior League of Pittsburgh	PA	4752 Liberty Ave Bloomfield Pittsburgh, PA 15224	0.0	0.0	0.0	0	2	0	1	0	0	0.0	0.0	0.0	0.0	0.0	0.0	0.0	0.0	1.0	0.0	0.0	0.0	0.0	0.0	0.0	0.0	0.0	0.0	0.0	0.0	0.0	0.0	0.0	0.0	0.0	0.0	0.0	0	0	0	0	0
Phoenix	9.035691521863127	2.801261943616326	9.612887064131245	33.4215163	-111.98424709999999	Yellow Cab	AZ	4525 E University Dr Phoenix, AZ 85034	2.8903717578961645	1.9459101490553132	0.0	0	2	0	1	0	0	0.0	0.0	0.0	0.0	0.0	0.0	0.0	0.0	0.0	0.0	0.0	0.0	0.0	0.0	0.0	0.0	0.0	0.0	0.0	0.0	0.0	0.0	0.0	0.0	0.0	0.0	0.0	0	0	0	0	0
Las Vegas	15.424768185353116	7.137525344208275	10.774500057325085	36.0291019	-115.11496070000001	Trish And Ed's Organics	NV	8876 S Eastern Ave Ste 100 Las Vegas, NV 89123	2.995732273553991	1.791759469228055	0.6931471805599453	0	2	0	1	1	0	0.0	0.0	0.0	0.0	0.0	0.0	0.0	0.0	1.0	0.0	0.0	0.0	0.0	0.0	0.0	0.0	0.0	0.0	1.0	0.0	0.0	0.0	0.0	0.0	0.0	0.0	0.0	0	0	0	0	0
Las Vegas	1.1095454476658828	9.01530026807117	7.388956156637083	36.169709600000004	-115.1236952	Spic & Span Spotless Cleaning Services	NV	Las Vegas, NV 89101	0.0	0.0	0.0	0	2	0	1	0	0	0.0	0.0	0.0	0.0	0.0	0.0	0.0	0.0	0.0	0.0	0.0	0.0	0.0	0.0	0.0	0.0	0.0	0.0	0.0	0.0	0.0	0.0	0.0	0.0	0.0	0.0	0.0	0	0	0	0	0
Phoenix	5.145194922498926	9.692845805196681	2.963913194299085	33.4974892	-112.0833763	Harley's Italian Bistro	AZ	4221 N 7th Ave Phoenix, AZ 85013	5.655991810819852	3.367295829986474	0.0	2	1	0	0	1	1	0.0	1.0	0.0	1.0	0.0	1.0	1.0	1.0	1.0	1.0	0.0	0.0	0.0	0.0	1.0	0.0	0.0	0.0	1.0	0.0	0.0	0.0	0.0	0.0	0.0	0.0	0.0	1	0	0	0	0
Pittsburgh	3.230011090028706	23.365908394049754	40.37975448823086	40.4566701102885	-79.96767582641841	Pope's Place	PA	3055 Brereton St Polish Hill Pittsburgh, PA 15219	3.091042453358316	1.791759469228055	0.0	0	1	0	1	0	0	0.0	0.0	0.0	1.0	1.0	0.0	0.0	0.0	1.0	0.0	1.0	0.0	0.0	0.0	0.0	0.0	0.0	0.0	0.0	0.0	0.0	0.0	0.0	0.0	0.0	1.0	0.0	0	0	0	1	0
Charlotte	1.6110195720290112	25.802518862536196	1.8877180899552537	35.2140739	-80.826589	Carpe Diem	NC	1535 Elizabeth Ave Elizabeth Charlotte, NC 28204	4.9344739331306915	2.5649493574615367	0.0	0	1	1	0	2	0	0.0	0.0	0.0	1.0	0.0	1.0	1.0	0.0	1.0	1.0	0.0	0.0	0.0	0.0	1.0	0.0	1.0	0.0	1.0	0.0	0.0	0.0	0.0	0.0	0.0	0.0	0.0	1	0	0	0	0
Pittsburgh	4.707619741746085	25.00614681760629	40.731949890121236	40.4711396	-79.96033829999999	Wagner Quality Shoes	PA	4313 Butler St Lawrenceville Pittsburgh, PA 15201	0.0	0.0	0.0	0	2	0	1	2	0	0.0	0.0	0.0	0.0	0.0	0.0	0.0	0.0	1.0	0.0	0.0	0.0	0.0	0.0	0.0	0.0	1.0	0.0	0.0	0.0	0.0	0.0	0.0	0.0	0.0	0.0	0.0	0	0	0	0	0
Las Vegas	4.196523005984319	8.4108978798341	4.899106217800996	36.158398	-115.18098799999999	Safe Nest	NV	2915 W Charleston Blvd Ste 12 Westside Las Vegas, NV 89102	3.1354942159291497	0.0	0.0	0	2	0	1	0	0	0.0	0.0	0.0	0.0	0.0	0.0	0.0	0.0	1.0	0.0	0.0	0.0	0.0	0.0	0.0	0.0	0.0	0.0	0.0	0.0	0.0	0.0	0.0	0.0	0.0	0.0	0.0	0	0	0	0	0
Las Vegas	15.218706816485202	7.444633643657449	8.75314522017076	36.0387077331543	-115.195037841797	GNC	NV	4150 Blue Diamond Rd Ste 109 Southwest Las Vegas, NV 89139	3.4657359027997265	0.6931471805599453	0.0	0	2	0	1	1	0	0.0	0.0	0.0	0.0	0.0	0.0	0.0	0.0	1.0	0.0	0.0	0.0	0.0	0.0	0.0	0.0	0.0	0.0	0.0	0.0	0.0	0.0	0.0	0.0	0.0	0.0	0.0	0	0	0	0	0
Las Vegas	9.638407762416858	13.499427910844366	9.652510198239984	36.180344700000006	-115.24148170000001	Breastfeeding & Babies, Yeah!	NV	800 North Rainbow Ste 148 Las Vegas, NV 89107	0.0	0.0	0.0	0	2	0	1	0	0	0.0	0.0	0.0	0.0	0.0	0.0	0.0	0.0	0.0	0.0	0.0	0.0	0.0	0.0	0.0	0.0	0.0	0.0	0.0	0.0	0.0	0.0	0.0	0.0	0.0	0.0	0.0	0	0	0	0	0
Las Vegas	6.948398012116404	6.216567286600934	2.431184234681283	36.1260826	-115.1939386	TruVape	NV	4059 Spring Mountain Rd Chinatown Las Vegas, NV 89102	6.095824562432225	3.258096538021482	0.0	0	2	0	1	1	0	0.0	0.0	0.0	0.0	0.0	0.0	0.0	0.0	1.0	0.0	0.0	0.0	0.0	0.0	0.0	0.0	0.0	0.0	1.0	0.0	0.0	0.0	0.0	0.0	0.0	0.0	0.0	0	0	0	0	0
Las Vegas	0.7199859075150031	9.071655074865765	6.788564776830222	36.171496000000005	-115.14148600000001	Red Mansion	NV	Downtown Grand Casino and Hotel 206 N 3rd St Downtown Las Vegas, NV 89101	3.6375861597263857	2.302585092994046	0.0	2	1	0	1	1	0	0.0	0.0	0.0	1.0	0.0	0.0	1.0	1.0	1.0	1.0	0.0	0.0	0.0	0.0	1.0	0.0	0.0	0.0	0.0	0.0	0.0	0.0	0.0	0.0	0.0	0.0	0.0	1	0	0	0	0
Las Vegas	16.46917686619262	10.328239729424446	9.984371805456856	36.0471607	-115.24334259999999	I Design 3D Nail Studio	NV	7729 S Rainbow Blvd Southwest Las Vegas, NV 89139	3.4339872044851463	1.0986122886681098	0.0	0	2	0	1	1	0	0.0	0.0	0.0	0.0	0.0	0.0	0.0	0.0	1.0	0.0	0.0	0.0	0.0	0.0	0.0	0.0	0.0	0.0	1.0	0.0	0.0	0.0	0.0	0.0	0.0	0.0	0.0	0	0	0	0	0
Las Vegas	17.801427529377847	9.201890517279386	12.18946815425885	36.006925	-115.14674280000001	Sweat Zone	NV	750 E Pyle Ave Southeast Las Vegas, NV 89183	0.0	0.0	0.0	0	2	0	1	0	0	0.0	0.0	0.0	0.0	0.0	0.0	0.0	0.0	0.0	0.0	0.0	0.0	0.0	0.0	0.0	0.0	0.0	0.0	0.0	0.0	0.0	0.0	0.0	0.0	0.0	0.0	0.0	0	0	0	0	0
Phoenix	7.73650867023188	8.217260778751264	5.0946391492026875	33.5095059	-112.02791459999999	The Limited	AZ	2502 E Camelback Phoenix, AZ 85016	3.258096538021482	0.6931471805599453	0.0	0	2	0	1	1	0	0.0	0.0	0.0	0.0	0.0	0.0	0.0	0.0	1.0	0.0	0.0	0.0	0.0	0.0	0.0	0.0	0.0	0.0	0.0	0.0	0.0	0.0	0.0	0.0	0.0	0.0	0.0	0	0	0	0	0
Las Vegas	9.696782017766795	7.120841691463526	9.728064294074553	36.1019718677717	-115.063769762462	Taqueria Los Pioneros	NV	4800 S Nellis Blvd Eastside Las Vegas, NV 89121	3.713572066704308	2.4849066497880004	0.0	1	2	0	1	0	0	0.0	0.0	0.0	1.0	1.0	0.0	0.0	1.0	1.0	0.0	0.0	0.0	0.0	0.0	1.0	0.0	0.0	0.0	1.0	0.0	0.0	0.0	0.0	0.0	0.0	0.0	0.0	1	0	0	0	0
Las Vegas	18.448934081591304	24.890576985602134	21.144158377135692	36.2820346	-115.2838731	Homegoods	NV	6680 N Durango Dr Centennial Las Vegas, NV 89149	5.641907070938114	2.302585092994046	0.0	0	2	0	1	1	0	0.0	0.0	0.0	0.0	0.0	0.0	0.0	0.0	1.0	0.0	0.0	0.0	0.0	0.0	0.0	0.0	0.0	0.0	1.0	0.0	0.0	0.0	0.0	0.0	0.0	0.0	0.0	0	0	0	0	0
Charlotte	18.38386518733468	27.122830096939648	16.232207048472066	35.056981	-80.85056290000001	Vine American Kitchen	NC	13735 Conlan Cir Ballantyne Charlotte, NC 28277	5.4638318050256105	2.995732273553991	0.6931471805599453	0	1	0	0	1	0	0.0	1.0	0.0	1.0	1.0	0.0	1.0	0.0	1.0	1.0	1.0	0.0	0.0	0.0	1.0	0.0	0.0	0.0	1.0	0.0	0.0	0.0	0.0	0.0	0.0	0.0	1.0	1	0	0	0	0
Phoenix	6.3462057298944226	4.819394798017015	4.636812159242641	33.480351899999995	-112.01540690000002	D & W Auto Service	AZ	3039 E Thomas Rd Phoenix, AZ 85008	3.4657359027997265	0.6931471805599453	0.0	0	2	0	1	0	0	0.0	0.0	0.0	0.0	0.0	0.0	0.0	0.0	0.0	0.0	0.0	0.0	0.0	0.0	0.0	0.0	0.0	0.0	0.0	0.0	0.0	0.0	0.0	0.0	0.0	0.0	0.0	0	0	0	0	0
Phoenix	0.6100011665689877	6.036845097780665	2.3360592801003666	33.454892	-112.069157	Tidy Casa	AZ	600 N 4th St Ste 866 Phoenix, AZ 85004	0.0	0.0	0.0	0	2	0	1	0	0	0.0	0.0	0.0	0.0	0.0	0.0	0.0	0.0	1.0	0.0	0.0	0.0	0.0	0.0	0.0	0.0	0.0	0.0	0.0	0.0	0.0	0.0	0.0	0.0	0.0	0.0	0.0	0	0	0	0	0
Edinburgh	1.2990511418183408	9.44365563482832	1.1147741098567063	55.957522399999995	-3.2076198	Starbucks	EDH	8-10 Baker's Place Stockbridge Edinburgh EH3 6SY	2.3978952727983707	1.0986122886681098	0.0	0	2	0	0	0	0	0.0	0.0	0.0	0.0	0.0	0.0	0.0	0.0	1.0	0.0	0.0	0.0	0.0	0.0	0.0	0.0	0.0	0.0	0.0	0.0	0.0	0.0	0.0	0.0	0.0	0.0	0.0	0	0	0	0	0
Phoenix	1.1123998189028228	6.889863761408773	1.8546934949813147	33.4616614849057	-112.07589128138201	McDowell Mountain Music Festival	AZ	1134 N Central Ave Phoenix, AZ 85003	3.6635616461296463	1.0986122886681098	0.0	0	2	0	1	0	0	0.0	1.0	0.0	0.0	0.0	0.0	0.0	1.0	1.0	0.0	0.0	1.0	0.0	0.0	0.0	0.0	0.0	0.0	0.0	0.0	0.0	0.0	0.0	0.0	0.0	0.0	0.0	0	0	0	0	0
Phoenix	10.212515972753582	16.527161118752442	10.173604137842386	33.493610100000005	-112.17232820000001	US Nails	AZ	5243 W Indian School Rd Phoenix, AZ 85031	1.3862943611198906	0.6931471805599453	0.0	0	2	0	1	1	0	0.0	0.0	0.0	0.0	0.0	0.0	0.0	0.0	1.0	0.0	0.0	0.0	0.0	0.0	0.0	0.0	0.0	0.0	0.0	0.0	0.0	0.0	0.0	0.0	0.0	0.0	0.0	0	0	0	0	0
Phoenix	27.043845417120835	29.685362560662863	24.476775337899493	33.694944	-112.09460700000001	Ever After Florals	AZ	1605 W Parkside Ste 2 Phoenix, AZ 85027	0.0	0.0	0.0	0	2	0	1	0	0	1.0	0.0	0.0	0.0	0.0	0.0	0.0	0.0	1.0	0.0	0.0	0.0	0.0	0.0	0.0	0.0	0.0	0.0	1.0	0.0	0.0	0.0	0.0	0.0	0.0	0.0	0.0	0	0	0	0	0
Phoenix	0.8628179067710683	5.84872955572253	3.4396927080843476	33.4449277	-112.0699337	Summit at Copper Square	AZ	310 S 3rd St Phoenix, AZ 85073	6.075346031088684	0.6931471805599453	0.0	0	2	0	1	0	0	0.0	0.0	0.0	0.0	0.0	0.0	0.0	0.0	0.0	0.0	0.0	0.0	0.0	0.0	0.0	0.0	0.0	0.0	0.0	0.0	0.0	0.0	0.0	0.0	0.0	0.0	0.0	0	0	0	0	0
Las Vegas	13.215368899763147	9.022352639527824	7.217929175609743	36.0845009114553	-115.241361430814	Illumilatte Brew Society	NV	6825 W Russell Rd Ste 155 Spring Valley Las Vegas, NV 89118	6.97166860472579	3.4011973816621555	0.0	0	2	0	0	0	0	0.0	1.0	0.0	0.0	0.0	0.0	0.0	1.0	1.0	0.0	0.0	0.0	0.0	0.0	0.0	0.0	0.0	0.0	1.0	0.0	0.0	0.0	0.0	0.0	0.0	0.0	0.0	0	0	0	0	0
Phoenix	46.98865967043311	49.836589043759226	44.511365657826516	33.870558	-112.1504116	Michael Alexander Salon	AZ	4205 W Anthem Way Ste 108 Phoenix, AZ 85086	1.6094379124341003	0.6931471805599453	0.0	0	2	0	1	1	0	0.0	0.0	0.0	0.0	0.0	0.0	0.0	1.0	1.0	0.0	0.0	0.0	0.0	0.0	0.0	0.0	0.0	0.0	1.0	0.0	0.0	0.0	0.0	0.0	0.0	0.0	0.0	0	0	0	0	0
Las Vegas	10.659989672915833	6.947086684577593	4.657897019413902	36.0979895679803	-115.21786181355499	Meadow Ridge Apartments	NV	5055 Lindell Rd Las Vegas, NV 89118	0.0	0.6931471805599453	0.0	0	2	0	1	0	0	0.0	0.0	0.0	0.0	0.0	0.0	0.0	0.0	0.0	0.0	0.0	0.0	0.0	0.0	0.0	0.0	0.0	0.0	0.0	0.0	0.0	0.0	0.0	0.0	0.0	0.0	0.0	0	0	0	0	0
Phoenix	8.269041356942765	9.565173332601828	11.00890275857105	33.3773788	-112.08153610000001	Ray's Feed Store	AZ	643 W Baseline Rd Phoenix, AZ 85041	1.3862943611198906	0.6931471805599453	0.0	0	2	0	1	0	0	0.0	0.0	0.0	0.0	0.0	0.0	0.0	0.0	0.0	0.0	0.0	0.0	0.0	0.0	0.0	0.0	0.0	0.0	0.0	0.0	0.0	0.0	0.0	0.0	0.0	0.0	0.0	0	0	0	0	0
Las Vegas	19.31429336482627	20.339283269869636	16.90621944035737	36.1599932	-115.35007879999999	Fantastic Sams Hair Salons	NV	11700 W Charleston #130 Summerlin Las Vegas, NV 89135	3.2188758248682006	1.6094379124341003	1.3862943611198906	0	2	0	1	0	0	0.0	0.0	0.0	0.0	0.0	0.0	0.0	1.0	1.0	0.0	0.0	0.0	0.0	0.0	0.0	0.0	0.0	0.0	1.0	0.0	0.0	0.0	0.0	0.0	0.0	0.0	0.0	0	0	0	0	0
Las Vegas	4.833727237334215	3.8743745351339807	2.416147749874276	36.124423	-115.146372	Swarovski	NV	The Forum Shops 3570 Las Vegas Blvd S Eastside Las Vegas, NV 89109	3.1780538303479458	0.6931471805599453	0.0	0	2	0	1	2	0	0.0	0.0	0.0	0.0	0.0	0.0	0.0	0.0	1.0	0.0	0.0	0.0	0.0	0.0	0.0	0.0	0.0	0.0	0.0	0.0	0.0	0.0	0.0	0.0	0.0	0.0	0.0	0	0	0	0	0
Phoenix	9.731114576860861	12.426316107824897	7.025153033735176	33.538994800000005	-112.0640088	Du Nails	AZ	742 E Glendale Ave Phoenix, AZ 85020	1.9459101490553132	1.0986122886681098	0.0	0	2	0	1	1	0	0.0	0.0	0.0	0.0	0.0	0.0	0.0	0.0	1.0	0.0	0.0	0.0	0.0	0.0	0.0	0.0	0.0	0.0	1.0	0.0	0.0	0.0	0.0	0.0	0.0	0.0	0.0	0	0	0	0	0
Edinburgh	2.972201681229739	10.84368861389285	3.566264359187611	55.9799453578823	-3.1884384155273398	Handmade Burger Company	EDH	LE3A Second Floor Ocean Terminal Leith Edinburgh EH6 6JJ	2.5649493574615367	1.0986122886681098	0.0	3	1	0	1	1	0	0.0	1.0	0.0	1.0	0.0	0.0	1.0	1.0	1.0	1.0	0.0	0.0	0.0	0.0	1.0	0.0	0.0	0.0	0.0	0.0	0.0	0.0	0.0	0.0	0.0	0.0	0.0	1	0	0	0	0
Las Vegas	10.824018510021151	15.321554726411824	11.481345401391826	36.19562	-115.25066699999999	The Coffee Bean & Tea Leaf	NV	7291 W Lake Mead Blvd Ste 110 Las Vegas, NV 89128	6.606650186198215	3.6109179126442243	0.0	0	2	0	0	0	0	0.0	1.0	0.0	0.0	0.0	0.0	0.0	0.0	1.0	0.0	0.0	0.0	0.0	0.0	0.0	0.0	0.0	0.0	1.0	0.0	0.0	0.0	0.0	0.0	0.0	0.0	0.0	0	0	0	0	0
Las Vegas	11.830427390644513	9.559104856600989	6.7515991079956335	36.108125	-115.2451	Gonzalez Landscaping	NV	4440 Verdugo St Spring Valley Las Vegas, NV 89147	0.0	0.0	0.0	0	2	0	1	0	0	0.0	0.0	0.0	0.0	0.0	0.0	0.0	0.0	0.0	0.0	0.0	0.0	0.0	0.0	0.0	0.0	0.0	0.0	0.0	0.0	0.0	0.0	0.0	0.0	0.0	0.0	0.0	0	0	0	0	0
Phoenix	5.857952455999037	10.171131232967078	3.558693276589467	33.5040543	-112.08281299999999	Modern On Melrose	AZ	4610 N 7th Ave Phoenix, AZ 85013	3.871201010907891	0.0	0.0	0	2	0	1	2	0	0.0	0.0	0.0	0.0	0.0	0.0	0.0	0.0	1.0	0.0	0.0	0.0	0.0	0.0	0.0	0.0	1.0	0.0	1.0	0.0	0.0	0.0	0.0	0.0	0.0	0.0	0.0	0	0	0	0	0
Madison	8.95068779129789	3.168511914678878	9.61246408513226	43.1275033	-89.3094196	Growlers Bar & Grille	WI	Crowne Plaza Madison 4402 E Washington Ave Norman Acres Madison, WI 53704	2.4849066497880004	0.0	0.0	0	2	0	1	0	0	0.0	0.0	0.0	1.0	0.0	0.0	0.0	0.0	1.0	1.0	0.0	0.0	0.0	0.0	0.0	0.0	0.0	0.0	0.0	0.0	0.0	0.0	0.0	0.0	0.0	0.0	0.0	1	0	0	1	0
Las Vegas	19.736735177433037	11.703863341667308	13.286951558462007	35.9992571	-115.2081398	Wells Fargo Bank	NV	10475 S Decatur Blvd Southwest Las Vegas, NV 89141	5.267858159063328	1.6094379124341003	0.0	0	2	0	1	0	0	0.0	0.0	0.0	0.0	0.0	0.0	0.0	0.0	0.0	0.0	0.0	0.0	0.0	0.0	0.0	0.0	0.0	0.0	0.0	0.0	0.0	0.0	0.0	0.0	0.0	0.0	0.0	0	0	0	0	0
Phoenix	14.226245897639357	20.632271969222593	14.841126263768386	33.4765	-112.22464699999999	San Salvador	AZ	7611 W Thomas Rd Phoenix, AZ 85033	2.833213344056216	1.0986122886681098	0.0	2	2	0	1	0	0	0.0	0.0	0.0	1.0	0.0	1.0	1.0	1.0	1.0	0.0	0.0	0.0	0.0	0.0	1.0	0.0	0.0	0.0	0.0	0.0	0.0	0.0	0.0	0.0	0.0	0.0	0.0	1	0	0	0	0
Las Vegas	10.552800430703956	6.043745771895608	4.221581671005155	36.092563	-115.20841100000001	Dog N Around	NV	5347 S Decatur Blvd Ste 102 Las Vegas, NV 89118	0.0	0.6931471805599453	0.0	0	2	0	1	0	0	0.0	0.0	0.0	0.0	0.0	0.0	0.0	0.0	0.0	0.0	0.0	0.0	0.0	0.0	0.0	0.0	0.0	0.0	0.0	0.0	0.0	0.0	0.0	0.0	0.0	0.0	0.0	0	0	0	0	0
Charlotte	0.25751173646690206	27.290735250626525	3.476164571487795	35.224215	-80.83909399999999	Hyatt House Charlotte Center City	NC	435 East Trade St First Ward Charlotte, NC 28202	4.7535901911063645	1.0986122886681098	0.0	0	2	0	0	1	0	0.0	0.0	0.0	0.0	0.0	0.0	0.0	0.0	1.0	0.0	0.0	0.0	0.0	0.0	0.0	0.0	0.0	0.0	0.0	0.0	0.0	0.0	0.0	0.0	0.0	0.0	0.0	0	0	0	0	0
Pittsburgh	5.988125915500258	25.178140663933316	37.596984421293996	40.453359000000006	-79.931454	The Inn on Negley	PA	703 S Negley Ave Shadyside Pittsburgh, PA 15232	2.5649493574615367	1.6094379124341003	0.0	2	2	0	0	1	0	0.0	1.0	0.0	1.0	0.0	0.0	1.0	0.0	1.0	1.0	0.0	0.0	0.0	0.0	0.0	0.0	1.0	0.0	1.0	0.0	0.0	0.0	0.0	0.0	0.0	0.0	0.0	1	0	0	0	0
Edinburgh	0.34593881116990116	10.880285419103092	0.9175737222236892	55.950567342514894	-3.1854763592133697	Monteiths Restaurant	EDH	61 High Street Old Town Edinburgh EH1 1SR	3.5553480614894135	1.791759469228055	0.0	2	1	1	1	2	1	0.0	1.0	0.0	1.0	0.0	0.0	1.0	0.0	1.0	1.0	0.0	0.0	0.0	0.0	0.0	1.0	1.0	0.0	0.0	0.0	0.0	0.0	0.0	0.0	0.0	0.0	1.0	1	0	0	1	0
Pittsburgh	3.678650360914478	16.88579460753058	43.73239916728227	40.422462200000005	-80.0356006	Parkway Center Mall	PA	1165 McKinney Ln West End Pittsburgh, PA 15220	2.3978952727983707	1.0986122886681098	0.0	0	2	0	1	0	0	0.0	0.0	0.0	0.0	0.0	0.0	0.0	0.0	1.0	0.0	0.0	0.0	0.0	0.0	0.0	0.0	0.0	0.0	1.0	0.0	0.0	0.0	0.0	0.0	0.0	0.0	0.0	0	0	0	0	0
Pittsburgh	5.951648102459639	14.478267504651987	42.485125888269806	40.394814399999994	-80.034142	Apple Inn	PA	2895 W Liberty Ave Dormont Pittsburgh, PA 15216	3.9318256327243257	1.6094379124341003	0.0	0	1	0	1	0	2	0.0	0.0	0.0	1.0	1.0	0.0	0.0	0.0	1.0	0.0	1.0	0.0	0.0	0.0	0.0	0.0	0.0	0.0	0.0	0.0	0.0	0.0	0.0	0.0	0.0	1.0	0.0	0	0	0	1	0
Charlotte	13.231344789819294	26.45315026717364	13.927134586410832	35.312144	-80.74509300000001	Tropical Delights	NC	9211 N Tryon St Ste 1 University City Charlotte, NC 28262	2.0794415416798357	0.6931471805599453	0.0	2	2	0	1	1	0	0.0	1.0	0.0	1.0	0.0	0.0	0.0	1.0	1.0	0.0	0.0	0.0	0.0	0.0	1.0	0.0	0.0	0.0	0.0	0.0	0.0	0.0	0.0	0.0	0.0	0.0	0.0	1	0	0	0	0
Edinburgh	2.364993067643587	12.284167877125201	2.4885320250193526	55.935571700000004	-3.1672865000000003	Prestonfield	EDH	Prestonfield House Priestfield Road Edinburgh EH16 5UT	3.1354942159291497	0.6931471805599453	0.0	0	2	0	0	2	0	0.0	0.0	0.0	0.0	0.0	0.0	0.0	0.0	1.0	0.0	0.0	0.0	0.0	0.0	0.0	0.0	0.0	0.0	0.0	0.0	0.0	0.0	0.0	0.0	0.0	0.0	0.0	0	0	0	0	0
Las Vegas	11.566573433936329	16.480910122244055	12.651187101375413	36.2064399	-115.25467890000002	Law Office of Michael R Cahill	NV	7371 Prairie Falcon Rd Ste 120 Las Vegas, NV 89128	0.0	0.0	0.0	0	2	0	1	0	0	0.0	0.0	0.0	0.0	0.0	0.0	0.0	0.0	0.0	0.0	0.0	0.0	0.0	0.0	0.0	0.0	0.0	0.0	0.0	0.0	0.0	0.0	0.0	0.0	0.0	0.0	0.0	0	0	0	0	0
Las Vegas	11.544292803514178	13.389033812934919	9.658633228516116	36.158657700000006	-115.2634783	Sparkle Nail Bar	NV	7871 W Charleston Blvd Ste 170 Westside Las Vegas, NV 89117	3.295836866004329	0.6931471805599453	0.0	0	2	0	1	1	0	0.0	0.0	0.0	0.0	0.0	0.0	0.0	1.0	1.0	0.0	0.0	0.0	0.0	0.0	0.0	0.0	0.0	0.0	1.0	0.0	0.0	0.0	0.0	0.0	0.0	0.0	0.0	0	0	0	0	0
Las Vegas	4.6406746730388475	6.423286547314603	2.867113307589857	36.140591	-115.17548700000002	Children's Choice Learning Center at Palace Station	NV	2750 S Rancho Dr Las Vegas, NV 89102	0.0	0.0	0.0	0	2	0	1	0	0	0.0	0.0	0.0	0.0	0.0	0.0	0.0	0.0	1.0	0.0	0.0	0.0	0.0	0.0	0.0	0.0	0.0	0.0	0.0	0.0	0.0	0.0	0.0	0.0	0.0	0.0	0.0	0	0	0	0	0
Las Vegas	5.522458655495518	3.5164567006063163	1.56188702531357	36.119675799999996	-115.1542126	Fairfield Inn Marriott	NV	3850 Paradise Road Eastside Las Vegas, NV 89169	4.624972813284271	1.3862943611198906	0.0	0	2	0	0	1	0	0.0	0.0	0.0	0.0	0.0	0.0	0.0	0.0	1.0	0.0	0.0	0.0	0.0	0.0	0.0	0.0	0.0	0.0	0.0	0.0	0.0	0.0	0.0	0.0	0.0	0.0	0.0	0	0	0	0	0
Phoenix	16.596858160168633	20.49138215144829	14.333395999014025	33.5964169	-112.1199387	QuikTrip	AZ	2840 W Cactus Rd Phoenix, AZ 85029	3.8918202981106265	1.3862943611198906	0.0	0	2	0	1	0	0	0.0	0.0	0.0	0.0	0.0	0.0	0.0	0.0	1.0	0.0	0.0	0.0	0.0	0.0	0.0	0.0	0.0	0.0	0.0	0.0	0.0	0.0	0.0	0.0	0.0	0.0	0.0	0	0	0	0	0
Phoenix	15.40816838316517	19.223095764401325	13.102384594946438	33.586999	-112.112122	Donley Service Center	AZ	11062 N 24th Ave Phoenix, AZ 85029	0.0	0.6931471805599453	0.0	0	2	0	1	0	0	0.0	0.0	0.0	0.0	0.0	0.0	0.0	0.0	1.0	0.0	0.0	0.0	0.0	0.0	0.0	0.0	0.0	0.0	0.0	0.0	0.0	0.0	0.0	0.0	0.0	0.0	0.0	0	0	0	0	0
Phoenix	22.579259535722287	22.601993707236844	19.78541375973519	33.640048	-111.98224499999999	Leslie's Swimming Pool Supplies	AZ	4601 E Bell Rd Ste 13 Phoenix, AZ 85032	0.0	0.0	0.0	0	2	0	1	1	0	0.0	0.0	0.0	0.0	0.0	0.0	0.0	0.0	1.0	0.0	0.0	0.0	0.0	0.0	0.0	0.0	0.0	0.0	0.0	0.0	0.0	0.0	0.0	0.0	0.0	0.0	0.0	0	0	0	0	0
Phoenix	11.288643228750631	16.418753881672778	9.656558910422934	33.53989	-112.1351424	Food City	AZ	3514 W Glendale Avenue Phoenix, AZ 85051	3.1354942159291497	0.6931471805599453	0.0	0	2	0	1	0	0	0.0	0.0	0.0	0.0	0.0	0.0	0.0	0.0	1.0	0.0	0.0	0.0	0.0	0.0	0.0	0.0	0.0	0.0	1.0	0.0	0.0	0.0	0.0	0.0	0.0	0.0	0.0	0	0	0	0	0
Phoenix	16.921264723088928	21.156898364924636	14.805157896062894	33.5956696816717	-112.134767237764	Pop The Soda Shop	AZ	12038 N 35th Ave Phoenix, AZ 85029	1.6094379124341003	0.6931471805599453	0.0	0	2	0	1	0	0	0.0	0.0	0.0	0.0	0.0	0.0	0.0	0.0	1.0	0.0	0.0	0.0	0.0	0.0	0.0	0.0	0.0	0.0	0.0	0.0	0.0	0.0	0.0	0.0	0.0	0.0	0.0	0	0	0	0	0
Phoenix	18.2245803720249	21.81905504906533	15.866261584579046	33.612546	-112.11458999999999	The Home Depot	AZ	2650 W Thunderbird Rd Phoenix, AZ 85023	5.634789603169249	1.9459101490553132	0.0	0	2	0	1	1	0	0.0	0.0	0.0	0.0	0.0	0.0	0.0	0.0	1.0	0.0	0.0	0.0	0.0	0.0	0.0	0.0	0.0	0.0	1.0	0.0	0.0	0.0	0.0	0.0	0.0	0.0	0.0	0	0	0	0	0
Phoenix	6.499945727415381	10.804798865694954	4.22547498765141	33.509536100000005	-112.085784	Fry's Food & Drug Stores & Fry's Marketplace	AZ	744 W Camelback Rd Phoenix, AZ 85013	6.045005314036012	2.70805020110221	0.0	0	2	0	1	1	0	0.0	0.0	0.0	0.0	0.0	0.0	0.0	0.0	1.0	0.0	0.0	0.0	0.0	0.0	0.0	0.0	0.0	0.0	1.0	0.0	0.0	0.0	0.0	0.0	0.0	0.0	0.0	0	0	0	0	0
Las Vegas	9.255255504488021	6.104044189701828	8.792344172417355	36.099854	-115.07476740000001	Los Compadres Meat Market	NV	4545 E Tropicana Ave Ste 6 Eastside Las Vegas, NV 89121	3.1354942159291497	1.0986122886681098	0.0	0	2	0	1	0	0	0.0	0.0	0.0	0.0	0.0	0.0	0.0	0.0	1.0	0.0	0.0	0.0	0.0	0.0	0.0	0.0	0.0	0.0	1.0	0.0	0.0	0.0	0.0	0.0	0.0	0.0	0.0	0	0	0	0	0
Edinburgh	0.46700126637359735	10.66502595310534	0.6567879915517946	55.949092900000004	-3.1892475	Le Passepartout	EDH	5-7 Old Fishmarket Close Newington Edinburgh EH1 1RW	1.6094379124341003	1.0986122886681098	0.0	0	2	0	1	1	0	0.0	0.0	0.0	0.0	0.0	0.0	0.0	0.0	0.0	0.0	0.0	0.0	0.0	0.0	0.0	0.0	0.0	0.0	0.0	0.0	0.0	0.0	0.0	0.0	0.0	0.0	0.0	1	0	0	0	0
Phoenix	6.89125567876356	8.751784311255246	4.100065108174721	33.5092512	-112.04655819999999	Tropical Smoothie Cafe	AZ	1640 E Camelback Rd Ste 150 Phoenix, AZ 85016	5.327876168789581	2.5649493574615367	0.0	0	2	0	0	0	0	0.0	1.0	0.0	0.0	0.0	1.0	0.0	1.0	1.0	0.0	0.0	0.0	0.0	0.0	1.0	0.0	0.0	0.0	1.0	0.0	0.0	0.0	0.0	0.0	0.0	0.0	0.0	1	0	0	0	0
Charlotte	12.24038365858264	26.22327020422372	12.950358832517951	35.305009000000005	-80.751698	Sleep Inn University Place	NC	8525 N Tryon St. University City Charlotte, NC 28262	2.4849066497880004	0.0	0.0	0	2	0	0	1	0	0.0	0.0	0.0	0.0	0.0	0.0	0.0	0.0	1.0	0.0	0.0	0.0	0.0	0.0	0.0	0.0	0.0	0.0	0.0	0.0	0.0	0.0	0.0	0.0	0.0	0.0	0.0	0	0	0	0	0
Las Vegas	18.424106757641336	22.351231898882798	18.52766858008098	36.221708	-115.329049	Shades Tanning Boutique	NV	3390 Novat St Ste 130 Northwest Las Vegas, NV 89129	4.127134385045092	1.791759469228055	0.0	0	2	0	1	0	0	0.0	0.0	0.0	0.0	0.0	0.0	0.0	0.0	1.0	0.0	0.0	0.0	0.0	0.0	0.0	0.0	0.0	0.0	1.0	0.0	0.0	0.0	0.0	0.0	0.0	0.0	0.0	0	0	0	0	0
Phoenix	17.984905711051752	14.763075119009624	20.10721882527769	33.3048956	-111.99241289999999	A Step Ahead Preschool & Montessori	AZ	4221 E Chandler Blvd Phoenix, AZ 85048	0.0	0.0	0.0	0	2	0	1	0	0	0.0	0.0	0.0	0.0	0.0	0.0	0.0	0.0	0.0	0.0	0.0	0.0	0.0	0.0	0.0	0.0	0.0	0.0	0.0	0.0	0.0	0.0	0.0	0.0	0.0	0.0	0.0	0	0	0	0	0
Pittsburgh	2.0321355946823365	20.15218178275457	40.03260893863029	40.428841399999996	-79.9834887	Pizza Sola	PA	1417 E Carson St South Side Pittsburgh, PA 15203	3.58351893845611	1.6094379124341003	0.0	0	2	0	1	0	0	0.0	0.0	0.0	1.0	0.0	0.0	0.0	1.0	1.0	0.0	0.0	0.0	0.0	0.0	1.0	0.0	1.0	0.0	0.0	0.0	0.0	0.0	0.0	0.0	0.0	0.0	0.0	1	0	0	0	1
Madison	1.618826093933414	7.218989382778416	2.354257569464344	43.0837395	-89.3768968	The Spot	WI	827 E Johnson St Tenney - Lapham Madison, WI 53703	4.07753744390572	2.3978952727983707	0.0	2	1	0	1	1	0	0.0	1.0	0.0	1.0	1.0	1.0	1.0	1.0	1.0	1.0	1.0	0.0	0.0	0.0	1.0	0.0	1.0	0.0	0.0	0.0	0.0	0.0	0.0	0.0	0.0	0.0	1.0	1	0	0	1	0
Phoenix	8.102510555949452	12.522623269376412	5.94813568457473	33.5224329	-112.09629640000001	Anna's Linens	AZ	1703 W Bethany Home Rd Ste 14 Phoenix, AZ 85015	2.833213344056216	0.0	0.0	0	2	0	1	1	0	0.0	0.0	0.0	0.0	0.0	0.0	0.0	0.0	1.0	0.0	0.0	0.0	0.0	0.0	0.0	0.0	0.0	0.0	0.0	0.0	0.0	0.0	0.0	0.0	0.0	0.0	0.0	0	0	0	0	0
Phoenix	11.061762600200453	13.32156354766262	8.314737364462468	33.5502946	-112.0565622	Clipology Salon	AZ	7818 N 12th St Phoenix, AZ 85020	2.0794415416798357	0.0	0.0	0	2	0	1	1	0	0.0	0.0	0.0	0.0	0.0	0.0	0.0	1.0	1.0	0.0	0.0	0.0	0.0	0.0	0.0	0.0	0.0	0.0	0.0	0.0	0.0	0.0	0.0	0.0	0.0	0.0	0.0	0	0	0	0	0
Phoenix	14.467677568463754	18.760233987837363	12.355500612681553	33.5751347	-112.1248482	Ulta Salon Cosmetics & Fragrance	AZ	9810 N Metro Pkwy W Phoenix, AZ 85051	0.0	0.6931471805599453	0.0	0	2	0	1	1	0	0.0	0.0	0.0	0.0	0.0	0.0	0.0	0.0	1.0	0.0	0.0	0.0	0.0	0.0	0.0	0.0	0.0	0.0	0.0	0.0	0.0	0.0	0.0	0.0	0.0	0.0	0.0	0	0	0	0	0
Las Vegas	14.040319734124475	12.561904930642681	9.625180333703812	36.1145463	-115.27750659999998	Flamingo Durango Self Storage	NV	8525 W Flamingo Rd Spring Valley Las Vegas, NV 89147	1.9459101490553132	1.0986122886681098	0.0	0	2	0	1	0	0	0.0	0.0	0.0	0.0	0.0	0.0	0.0	0.0	1.0	0.0	0.0	0.0	0.0	0.0	0.0	0.0	0.0	0.0	0.0	0.0	0.0	0.0	0.0	0.0	0.0	0.0	0.0	0	0	0	0	0
Las Vegas	4.308555781242205	6.76118772795864	3.278997107622841	36.1444406	-115.17448190000002	Pasta Cucina	NV	Palace Station Hotel & Casino 2420 W Sahara Ave Las Vegas, NV 89102	4.02535169073515	2.1972245773362196	0.0	2	1	0	1	1	0	0.0	0.0	0.0	1.0	0.0	0.0	1.0	0.0	1.0	1.0	0.0	0.0	0.0	0.0	0.0	0.0	0.0	0.0	1.0	0.0	0.0	0.0	0.0	0.0	0.0	0.0	0.0	1	0	0	0	0
Charlotte	5.856559058462721	21.518029847803817	2.9968876614973947	35.202137	-80.781657	Chris' Deli	NC	3619 E Independence Blvd Eastland Charlotte, NC 28205	3.9512437185814275	1.6094379124341003	0.0	0	0	0	1	0	0	1.0	0.0	0.0	1.0	1.0	1.0	1.0	1.0	1.0	0.0	0.0	0.0	0.0	0.0	1.0	0.0	0.0	0.0	1.0	0.0	0.0	0.0	0.0	0.0	0.0	0.0	0.0	1	1	0	0	0
Phoenix	29.09574725002617	31.93570692570575	26.58009415123139	33.712368299999994	-112.10966880000001	The Greek Pita	AZ	2501 W Happy Valley Rd Ste 50-1229 Phoenix, AZ 85085	5.7430031878094825	3.6109179126442243	0.0	0	2	0	0	0	0	0.0	1.0	0.0	1.0	0.0	1.0	0.0	1.0	1.0	0.0	0.0	0.0	0.0	0.0	1.0	0.0	0.0	0.0	1.0	0.0	0.0	0.0	0.0	0.0	0.0	0.0	0.0	1	0	0	0	0
Charlotte	1.3684131966967563	28.185844546122183	3.9848312686639904	35.21603629999999	-80.8538011	Helles & Dunkel	NC	222 E Bland St South End Charlotte, NC 28203	3.1780538303479458	0.0	0.0	0	1	0	1	1	0	0.0	1.0	0.0	1.0	1.0	0.0	0.0	0.0	1.0	0.0	1.0	0.0	0.0	0.0	0.0	0.0	0.0	0.0	0.0	0.0	0.0	0.0	0.0	0.0	0.0	0.0	0.0	0	0	0	1	0
Phoenix	5.315285141827936	10.870729117526558	7.639475073358557	33.427749600000006	-112.1240112	Tent City Jail	AZ	2939 W Durango St Phoenix, AZ 85009	4.07753744390572	2.0794415416798357	0.0	0	2	0	1	0	0	0.0	0.0	0.0	0.0	0.0	0.0	0.0	0.0	0.0	0.0	0.0	0.0	0.0	0.0	0.0	0.0	0.0	0.0	0.0	0.0	0.0	0.0	0.0	0.0	0.0	0.0	0.0	0	0	0	0	0
Charlotte	15.069137202595616	19.732931496715693	11.944145439692473	35.0967174	-80.77857979999999	Oreck Clean Home Center	NC	8140 Providence Rd Arboretum Charlotte, NC 28277	1.6094379124341003	0.0	0.0	0	2	0	1	1	0	0.0	0.0	0.0	0.0	0.0	0.0	0.0	0.0	1.0	0.0	0.0	0.0	0.0	0.0	0.0	0.0	0.0	0.0	0.0	0.0	0.0	0.0	0.0	0.0	0.0	0.0	0.0	0	0	0	0	0
Phoenix	14.385017440445253	18.710717542979303	12.288003589950403	33.5741241532692	-112.125614583492	Mi Pueblo	AZ	9620 N Metro Pkwy W Phoenix, AZ 85051	5.407171771460119	3.6375861597263857	0.0	0	1	0	1	1	0	0.0	1.0	0.0	1.0	1.0	1.0	1.0	1.0	1.0	0.0	0.0	0.0	0.0	0.0	1.0	0.0	0.0	0.0	1.0	0.0	0.0	0.0	0.0	0.0	0.0	0.0	0.0	1	0	0	0	0
Las Vegas	6.451487339340482	5.114355819085372	1.2732849440602978	36.122412	-115.181458	Ambassador Limousine	NV	3215 Cinder Ln Chinatown Las Vegas, NV 89103	0.0	0.0	0.0	0	2	0	1	0	0	0.0	0.0	0.0	0.0	0.0	0.0	0.0	0.0	0.0	0.0	0.0	0.0	0.0	0.0	0.0	0.0	0.0	0.0	0.0	0.0	0.0	0.0	0.0	0.0	0.0	0.0	0.0	0	0	0	0	0
Las Vegas	4.660892997236587	3.943387339096377	3.2085167768610456	36.1251152	-115.13718659999999	Gnc	NV	3538 S Maryland Pkwy Eastside Las Vegas, NV 89169	3.1780538303479458	0.0	0.0	0	2	0	1	1	0	0.0	0.0	0.0	0.0	0.0	0.0	0.0	0.0	1.0	0.0	0.0	0.0	0.0	0.0	0.0	0.0	0.0	0.0	0.0	0.0	0.0	0.0	0.0	0.0	0.0	0.0	0.0	0	0	0	0	0
Las Vegas	12.954355247616316	14.61891972963951	10.946086215971484	36.159366	-115.279257	Best Mattress	NV	8570 W Charleston Blvd Westside Las Vegas, NV 89117	2.5649493574615367	0.6931471805599453	0.0	0	2	0	1	1	0	0.0	0.0	0.0	0.0	0.0	0.0	0.0	0.0	1.0	0.0	0.0	0.0	0.0	0.0	0.0	0.0	0.0	0.0	1.0	0.0	0.0	0.0	0.0	0.0	0.0	0.0	0.0	0	0	0	0	0
Phoenix	7.098286837360541	0.6856832028889145	7.4413338431257845	33.4358752502864	-112.00053054085801	American Airlines	AZ	3400 E Sky Harbor Blvd Phoenix, AZ 85034	6.594413459749778	2.995732273553991	0.0	0	2	0	1	0	0	0.0	0.0	0.0	0.0	0.0	0.0	0.0	0.0	0.0	0.0	0.0	0.0	0.0	0.0	0.0	0.0	0.0	0.0	0.0	0.0	0.0	0.0	0.0	0.0	0.0	0.0	0.0	0	0	0	0	0
Las Vegas	9.087473411335937	1.0060699559549764	3.6212191763106807	36.086251000000004	-115.151703	TCBY	NV	McCarran International Airport 5757 Wayne Newton Blvd Southeast Las Vegas, NV 89101	3.5263605246161616	1.0986122886681098	0.0	0	2	0	1	0	0	0.0	0.0	0.0	0.0	0.0	0.0	0.0	0.0	1.0	0.0	0.0	0.0	0.0	0.0	0.0	0.0	0.0	0.0	0.0	0.0	0.0	0.0	0.0	0.0	0.0	0.0	0.0	0	0	0	0	0
Phoenix	23.636730973181926	26.342357752969324	21.069577892892564	33.664346	-112.09124820000001	Beast Printing	AZ	19615 N 15th Ave Phoenix, AZ 85027	0.0	0.0	0.0	0	2	0	1	0	0	0.0	0.0	0.0	0.0	0.0	0.0	0.0	0.0	1.0	0.0	0.0	0.0	0.0	0.0	0.0	0.0	0.0	0.0	0.0	0.0	0.0	0.0	0.0	0.0	0.0	0.0	0.0	0	0	0	0	0
Las Vegas	14.664102931904495	21.470029404143208	17.816259767522784	36.262854600000004	-115.2479961	Island Pet Hospital	NV	7025 W Ann Road Northwest Las Vegas, NV 89130	2.3978952727983707	0.0	0.0	0	2	0	1	0	0	0.0	0.0	0.0	0.0	0.0	0.0	0.0	0.0	0.0	0.0	0.0	0.0	0.0	0.0	0.0	0.0	0.0	0.0	0.0	0.0	0.0	0.0	0.0	0.0	0.0	0.0	0.0	0	0	0	0	0
Charlotte	9.269067326929955	36.01690929884263	11.89772929519992	35.2205875200223	-80.9427848465006	Jamba Juice	NC	Charlotte/Douglas International Airport 5501 Josh Birmingham Pkwy., Concourse D Charlotte, NC 28219	6.144185634125646	3.4339872044851463	0.6931471805599453	0	2	0	1	0	0	0.0	0.0	0.0	0.0	0.0	0.0	0.0	0.0	1.0	0.0	0.0	0.0	0.0	0.0	0.0	0.0	0.0	0.0	0.0	1.0	0.0	0.0	0.0	0.0	0.0	0.0	0.0	0	0	0	0	0
Phoenix	6.397900814674582	12.686293032481226	6.434805803630792	33.480778	-112.133941	Subway	AZ	3440 W Thomas Rd Phoenix, AZ 85017	2.0794415416798357	1.0986122886681098	0.0	0	2	0	1	0	0	0.0	0.0	0.0	0.0	0.0	0.0	0.0	0.0	1.0	0.0	0.0	0.0	0.0	0.0	0.0	0.0	0.0	0.0	0.0	0.0	0.0	0.0	0.0	0.0	0.0	0.0	0.0	1	1	1	0	0
Edinburgh	2.2078501116324922	9.769149199080227	1.4025009817686573	55.9368944	-3.2082441000000004	Le Mouton Noir	EDH	3-5 Viewforth Bruntsfield Edinburgh EH10 4JD	2.1972245773362196	1.0986122886681098	0.0	1	0	0	1	2	0	0.0	0.0	0.0	1.0	0.0	0.0	1.0	1.0	1.0	1.0	0.0	0.0	0.0	0.0	0.0	0.0	0.0	0.0	0.0	0.0	0.0	0.0	0.0	0.0	0.0	0.0	0.0	1	0	0	0	0
Las Vegas	0.7195823657895688	8.903298527227815	6.5879465783681965	36.169971000000004	-115.14277140000002	Frankie Scinta	NV	301 Fremont St Downtown Las Vegas, NV 89101	2.8903717578961645	0.0	0.0	0	2	0	1	0	0	0.0	0.0	0.0	0.0	0.0	0.0	0.0	0.0	0.0	0.0	0.0	0.0	0.0	0.0	0.0	0.0	0.0	0.0	0.0	0.0	0.0	0.0	0.0	0.0	0.0	0.0	0.0	0	0	0	0	0
Las Vegas	13.510557349637589	21.224864433221384	17.84846406079217	36.2726085657324	-115.21059515423799	Target	NV	6371 N Decatur Blvd Centennial Las Vegas, NV 89130	7.1049654482698426	3.6635616461296463	0.0	0	2	0	1	1	0	0.0	0.0	0.0	0.0	0.0	0.0	0.0	0.0	1.0	0.0	0.0	0.0	0.0	0.0	0.0	0.0	0.0	0.0	1.0	0.0	0.0	0.0	0.0	0.0	0.0	0.0	0.0	0	0	0	0	0
Charlotte	2.198174916815095	25.294112188026922	2.2839557912143795	35.220746000000005	-80.81695	Sensibly Chic Designs for Life	NC	830 Lamar Ave Plaza Midwood Charlotte, NC 28204	0.0	0.6931471805599453	0.0	0	2	0	1	3	0	0.0	0.0	0.0	0.0	0.0	0.0	0.0	0.0	1.0	0.0	0.0	0.0	0.0	0.0	0.0	0.0	1.0	0.0	1.0	0.0	0.0	0.0	0.0	0.0	0.0	0.0	0.0	0	0	0	0	0
Las Vegas	4.833727237334215	3.8743745351339807	2.416147749874276	36.124423	-115.146372	Aveda Experience Center	NV	3200 Las Vegas Blvd S Eastside Las Vegas, NV 89109	2.4849066497880004	0.0	0.0	0	2	0	1	1	0	0.0	0.0	0.0	0.0	0.0	0.0	0.0	0.0	1.0	0.0	0.0	0.0	0.0	0.0	0.0	0.0	0.0	0.0	0.0	0.0	0.0	0.0	0.0	0.0	0.0	0.0	0.0	0	0	0	0	0
Edinburgh	0.6843063300967466	10.943589542515756	0.9190744597097754	55.9473578	-3.1851575	B'est	EDH	16 Drummond Street Newington Edinburgh EH8 9TX	1.3862943611198906	0.6931471805599453	0.0	0	2	0	1	1	0	0.0	0.0	0.0	1.0	0.0	0.0	1.0	1.0	1.0	1.0	0.0	0.0	0.0	0.0	0.0	0.0	0.0	0.0	0.0	0.0	0.0	0.0	0.0	0.0	0.0	0.0	0.0	1	0	0	0	0
Phoenix	8.785243882951358	8.103615358489636	6.322772180598042	33.510394	-112.011028	Stephen Lynch Hair Studio	AZ	3240 E. Camelback Rd Ste 10 Phoenix, AZ 85018	2.0794415416798357	0.0	0.0	0	2	0	1	1	0	0.0	0.0	0.0	0.0	0.0	0.0	0.0	1.0	0.0	0.0	0.0	0.0	0.0	0.0	0.0	0.0	0.0	0.0	0.0	0.0	0.0	0.0	0.0	0.0	0.0	0.0	0.0	0	0	0	0	0
Las Vegas	5.724059377794915	2.9259001464420047	3.244854446644161	36.1155209	-115.1345645	Las Vegas Estate Sales, LLC	NV	1350 E Flamingo Rd 663 Eastside Las Vegas, NV 89119	1.3862943611198906	0.0	0.0	0	2	0	1	0	0	0.0	0.0	0.0	0.0	0.0	0.0	0.0	0.0	1.0	0.0	0.0	0.0	0.0	0.0	0.0	0.0	0.0	0.0	0.0	0.0	0.0	0.0	0.0	0.0	0.0	0.0	0.0	0	0	0	0	0
Charlotte	2.6989976388999404	27.488560891076396	3.4593620950564192	35.200069	-80.852474	Slices	NC	2212 Park Rd Sedgefield Charlotte, NC 28203	2.833213344056216	1.791759469228055	0.0	2	2	0	1	0	0	1.0	0.0	0.0	1.0	1.0	1.0	0.0	1.0	1.0	0.0	0.0	0.0	0.0	0.0	1.0	0.0	0.0	0.0	1.0	0.0	0.0	0.0	0.0	0.0	0.0	0.0	0.0	1	0	0	0	1
Phoenix	7.824748788210345	7.988709731787382	5.243732096989401	33.5081108	-112.0239428	Chicago Title	AZ	2701 E Camelback Rd Ste 130 Phoenix, AZ 85016	0.0	0.0	0.0	0	2	0	1	0	0	0.0	0.0	0.0	0.0	0.0	0.0	0.0	0.0	0.0	0.0	0.0	0.0	0.0	0.0	0.0	0.0	0.0	0.0	0.0	0.0	0.0	0.0	0.0	0.0	0.0	0.0	0.0	0	0	0	0	0
Las Vegas	14.006240862409502	15.608420992894908	11.969484238698948	36.1607472	-115.2910679	Las Vegas Golf & Tennis	NV	1000 S Rampart Blvd Ste 10 Westside Las Vegas, NV 89145	2.995732273553991	0.0	0.0	0	2	0	1	1	0	0.0	0.0	0.0	0.0	0.0	0.0	0.0	0.0	1.0	0.0	0.0	0.0	0.0	0.0	0.0	0.0	0.0	0.0	1.0	0.0	0.0	0.0	0.0	0.0	0.0	0.0	0.0	0	0	0	0	0
Pittsburgh	2.1969225010471236	20.92974407644182	44.02692827514411	40.456693	-80.017448	Molly's Trolleys	PA	842 Jacksonia St North Side Pittsburgh, PA 15233	1.6094379124341003	0.6931471805599453	0.0	0	2	0	1	0	0	0.0	0.0	0.0	0.0	0.0	0.0	0.0	0.0	0.0	0.0	0.0	0.0	0.0	0.0	0.0	0.0	0.0	0.0	0.0	0.0	0.0	0.0	0.0	0.0	0.0	0.0	0.0	0	0	0	0	0
Phoenix	0.34641345875280133	6.331109386828955	3.130278547573401	33.448577	-112.074448	SafePro Auto Glass	AZ	2 N Central Ave Phoenix, AZ 85004	0.0	2.302585092994046	0.0	0	2	0	1	0	0	0.0	0.0	0.0	0.0	0.0	0.0	0.0	0.0	0.0	0.0	0.0	0.0	0.0	0.0	0.0	0.0	0.0	0.0	0.0	0.0	0.0	0.0	0.0	0.0	0.0	0.0	0.0	0	0	0	0	0
Pittsburgh	2.4145738755737267	20.09882711190487	39.681630710756956	40.426160100000004	-79.98062990000001	St James Place Tavern	PA	153 S 18th St South Side Pittsburgh, PA 15203	4.61512051684126	1.3862943611198906	0.0	1	1	0	1	0	2	0.0	0.0	0.0	1.0	1.0	0.0	0.0	0.0	1.0	0.0	0.0	0.0	0.0	0.0	0.0	0.0	0.0	0.0	0.0	0.0	0.0	1.0	0.0	0.0	1.0	1.0	0.0	0	0	0	1	0
Phoenix	20.831354751340537	23.194347866144618	18.183163323412543	33.6395011	-112.07176840000001	Sunflower Farmers Market	AZ	245 East Bell Road #15 Phoenix, AZ 85022	4.68213122712422	2.1972245773362196	0.6931471805599453	0	2	0	1	1	0	0.0	0.0	0.0	0.0	0.0	0.0	0.0	0.0	1.0	0.0	0.0	0.0	0.0	0.0	0.0	0.0	0.0	0.0	1.0	0.0	0.0	0.0	0.0	0.0	0.0	0.0	0.0	0	0	0	0	0
Las Vegas	0.6525810488869448	8.927552365680866	6.645928389379048	36.1701968	-115.1417662	Las Vegas Cuban Cigar Factory	NV	109 N 4th St Downtown Las Vegas, NV 89101	2.0794415416798357	0.0	0.0	0	2	0	1	3	0	0.0	0.0	0.0	0.0	0.0	0.0	0.0	0.0	0.0	0.0	0.0	0.0	0.0	0.0	0.0	0.0	0.0	0.0	0.0	0.0	0.0	0.0	0.0	0.0	0.0	0.0	0.0	0	0	0	0	0
Las Vegas	3.6198342897271547	10.07624077129959	6.834733134833605	36.1765881816697	-115.17409542668999	Larry's Villa	NV	2401 W Bonanza Rd Ste A Las Vegas, NV 89106	3.7376696182833684	1.9459101490553132	0.0	0	1	0	1	1	2	0.0	0.0	0.0	1.0	1.0	0.0	0.0	0.0	1.0	0.0	1.0	1.0	0.0	0.0	0.0	0.0	0.0	0.0	0.0	0.0	0.0	1.0	0.0	0.0	0.0	0.0	0.0	0	0	0	1	0
Charlotte	9.845618682104329	36.662530445633735	12.527002248359777	35.223425800078004	-80.949140368579	Dollar Rent A Car	NC	5501 Josh Birmingham Pkwy Charlotte, NC 28208	3.2188758248682006	1.3862943611198906	0.0	0	2	0	1	0	0	0.0	0.0	0.0	0.0	0.0	0.0	0.0	0.0	0.0	0.0	0.0	0.0	0.0	0.0	0.0	0.0	0.0	0.0	0.0	0.0	0.0	0.0	0.0	0.0	0.0	0.0	0.0	0	0	0	0	0
Charlotte	13.240583274700734	15.700093084932355	9.790777055742398	35.139767	-80.73623420000001	Burger King 4763	NC	1728 Sardis Rd N Charlotte, NC 28270	1.9459101490553132	0.0	0.0	0	2	0	1	0	0	0.0	1.0	0.0	1.0	0.0	0.0	0.0	1.0	0.0	0.0	0.0	0.0	0.0	0.0	1.0	0.0	0.0	0.0	0.0	0.0	0.0	0.0	0.0	0.0	0.0	0.0	0.0	1	0	0	0	0
Charlotte	9.071907313075112	28.636433249901653	10.806181605973467	35.296894	-80.799624	United States Post Office	NC	2505 Derita Ave Derita Charlotte, NC 28269	3.258096538021482	0.6931471805599453	0.0	0	2	0	1	0	0	0.0	0.0	0.0	0.0	0.0	0.0	0.0	0.0	0.0	0.0	0.0	0.0	0.0	0.0	0.0	0.0	0.0	0.0	0.0	0.0	0.0	0.0	0.0	0.0	0.0	0.0	0.0	0	0	0	0	0
Las Vegas	0.8208763762193694	8.99246618733529	6.644187125463365	36.1707639	-115.14352620000001	Second Street Grill	NV	200 Fremont St Downtown Las Vegas, NV 89101	4.330733340286331	2.0794415416798357	0.0	2	1	0	1	2	0	0.0	0.0	0.0	1.0	0.0	0.0	1.0	0.0	1.0	1.0	0.0	0.0	0.0	0.0	0.0	0.0	0.0	1.0	0.0	0.0	0.0	0.0	0.0	0.0	0.0	0.0	0.0	1	0	0	0	0
Phoenix	6.826165683373981	13.00097644361925	6.54523223176464	33.487930199999994	-112.1338629	Roberto's Sofa Factory	AZ	3401 N 35th Ave Phoenix, AZ 85017	0.0	0.0	0.0	0	2	0	1	0	0	0.0	0.0	0.0	0.0	0.0	0.0	0.0	0.0	0.0	0.0	0.0	0.0	0.0	0.0	0.0	0.0	0.0	0.0	0.0	0.0	0.0	0.0	0.0	0.0	0.0	0.0	0.0	0	0	0	0	0
Edinburgh	1.5259249019508145	11.38207967075784	2.357827154039861	55.96530229999999	-3.1766330000000003	The Harp and Castle	EDH	298 Leith Walk Leith Edinburgh EH6 5BU	1.791759469228055	0.0	0.0	0	1	0	1	0	0	0.0	0.0	0.0	0.0	0.0	0.0	0.0	0.0	1.0	0.0	0.0	0.0	0.0	0.0	0.0	0.0	0.0	0.0	0.0	0.0	0.0	0.0	0.0	0.0	0.0	0.0	0.0	0	0	0	1	0
Las Vegas	0.6355207409505568	8.292756639445052	6.062288782676754	36.1644755	-115.1418781	Jimmerson Hansen	NV	415 S 6th St Ste 100 Downtown Las Vegas, NV 89101	0.0	0.0	0.0	0	2	0	1	0	0	0.0	0.0	0.0	0.0	0.0	0.0	0.0	0.0	0.0	0.0	0.0	0.0	0.0	0.0	0.0	0.0	0.0	0.0	0.0	0.0	0.0	0.0	0.0	0.0	0.0	0.0	0.0	0	0	0	0	0
Las Vegas	7.159461139850989	2.6168804916988213	4.858580701533369	36.104113	-115.118353	Livescan Las Vegas	NV	4680 S Eastern Ave Ste H Eastside Las Vegas, NV 89119	0.0	0.0	0.0	0	2	0	1	0	0	0.0	0.0	0.0	0.0	0.0	0.0	0.0	0.0	0.0	0.0	0.0	0.0	0.0	0.0	0.0	0.0	0.0	0.0	0.0	0.0	0.0	0.0	0.0	0.0	0.0	0.0	0.0	0	0	0	0	0
Phoenix	4.534698762811864	8.77201804913573	2.1060362051703607	33.4925802	-112.07526509999998	Paul Woodbury, DMD	AZ	4000 N Central Ave Ste 1401 Phoenix, AZ 85012	2.772588722239781	0.6931471805599453	0.0	0	2	0	1	0	0	0.0	0.0	0.0	0.0	0.0	0.0	0.0	0.0	0.0	0.0	0.0	0.0	0.0	0.0	0.0	0.0	0.0	0.0	0.0	0.0	0.0	0.0	0.0	0.0	0.0	0.0	0.0	0	0	0	0	0
Las Vegas	9.157396712378008	5.916704658588758	8.610956515406977	36.0997216521707	-115.076853674875	Tacos El Compita 3	NV	4455 E Tropicana St Eastside Las Vegas, NV 89121	3.332204510175204	1.791759469228055	1.791759469228055	0	2	0	1	0	0	0.0	0.0	0.0	1.0	1.0	0.0	0.0	1.0	1.0	0.0	0.0	0.0	0.0	0.0	1.0	0.0	0.0	0.0	0.0	0.0	0.0	0.0	0.0	0.0	0.0	0.0	0.0	1	0	0	0	0
Las Vegas	6.425035222858195	3.72247505907696	0.24570604821677322	36.115471	-115.16791979999999	Battista's Hole In the Wall	NV	4041 Linq Ln The Strip Las Vegas, NV 89109	6.873163834212518	4.382026634673881	0.6931471805599453	0	1	0	1	1	0	0.0	0.0	0.0	1.0	0.0	0.0	1.0	1.0	1.0	1.0	0.0	0.0	0.0	0.0	1.0	0.0	0.0	0.0	1.0	0.0	0.0	0.0	0.0	0.0	0.0	0.0	0.0	1	0	0	0	0
Las Vegas	7.7989790877107525	2.869280914531842	1.4183753797489937	36.102323999999996	-115.169228	Project Pie	NV	3799 S Las Vegas Blvd Eastside Las Vegas, NV 89109	6.795705775173514	4.143134726391533	1.0986122886681098	0	2	0	1	1	0	0.0	0.0	0.0	1.0	0.0	0.0	0.0	1.0	1.0	0.0	0.0	0.0	0.0	0.0	1.0	0.0	0.0	0.0	0.0	1.0	0.0	0.0	0.0	0.0	0.0	0.0	0.0	1	0	0	0	1
Charlotte	21.18780395414683	24.09864885070099	18.481930339646794	35.0338633	-80.8047016	Aloha Nails	NC	9935 Rea Rd Ste B Charlotte, NC 28277	3.8918202981106265	2.0794415416798357	0.0	0	2	0	1	1	0	0.0	0.0	0.0	0.0	0.0	0.0	0.0	0.0	1.0	0.0	0.0	0.0	0.0	0.0	0.0	0.0	0.0	0.0	1.0	0.0	0.0	0.0	0.0	0.0	0.0	0.0	0.0	0	0	0	0	0
Pittsburgh	8.002897765622363	13.414830620522887	40.6454789204207	40.37154	-80.0214	The Original Gyro	PA	3611 Library Rd Pittsburgh, PA 15234	2.772588722239781	1.6094379124341003	0.0	2	2	0	1	0	0	0.0	1.0	0.0	1.0	1.0	0.0	0.0	1.0	0.0	1.0	0.0	0.0	0.0	0.0	1.0	0.0	0.0	0.0	1.0	0.0	0.0	0.0	0.0	0.0	0.0	0.0	0.0	1	0	0	0	0
Phoenix	15.18775329760141	19.441562446067156	13.064566331824958	33.5813800457343	-112.126998603344	Verizon	AZ	3121 West Peoria Avenue Suite 112 Phoenix, AZ 85029	2.70805020110221	0.0	0.0	0	2	0	1	3	0	0.0	0.0	0.0	0.0	0.0	0.0	0.0	0.0	1.0	0.0	0.0	0.0	0.0	0.0	0.0	0.0	0.0	0.0	0.0	0.0	0.0	0.0	0.0	0.0	0.0	0.0	0.0	0	0	0	0	0
Edinburgh	0.35562171595987935	10.33324146673388	0.73670049436601	55.9542321	-3.1936847000000004	St Andrew Square Garden	EDH	St Andrew Square New Town Edinburgh EH2	4.454347296253507	1.3862943611198906	0.0	0	2	0	1	0	0	0.0	0.0	0.0	0.0	0.0	0.0	0.0	1.0	0.0	0.0	0.0	0.0	0.0	0.0	0.0	0.0	0.0	0.0	0.0	0.0	0.0	0.0	0.0	0.0	0.0	0.0	0.0	0	0	0	0	0
Phoenix	8.43020469985579	10.342605962749595	5.6302496929552	33.5243505	-112.04784029999999	Koller True Value Hardware	AZ	6016 N 16th St Phoenix, AZ 85016	4.442651256490317	0.6931471805599453	0.0	0	2	0	1	1	0	0.0	0.0	0.0	0.0	0.0	0.0	0.0	0.0	1.0	0.0	0.0	0.0	0.0	0.0	0.0	0.0	0.0	0.0	1.0	0.0	0.0	0.0	0.0	0.0	0.0	0.0	0.0	0	0	0	0	0
Phoenix	15.293598084028247	19.063105412722127	12.96962614728346	33.586331	-112.1100649	On Time Air Conditioning & Heating	AZ	2329 W Mescal St Ste 309 Phoenix, AZ 85029	0.0	0.0	0.0	0	2	0	1	0	0	0.0	0.0	0.0	0.0	0.0	0.0	0.0	0.0	1.0	0.0	0.0	0.0	0.0	0.0	0.0	0.0	0.0	0.0	0.0	0.0	0.0	0.0	0.0	0.0	0.0	0.0	0.0	0	0	0	0	0
Madison	0.7512158009967785	8.58173092075898	1.5806832380756661	43.072631	-89.384011	Peppino's Restaurant	WI	111 S Hamilton St Capitol Madison, WI 53703	0.0	0.0	0.0	0	1	0	1	2	0	0.0	1.0	0.0	1.0	0.0	0.0	1.0	1.0	1.0	1.0	0.0	0.0	0.0	1.0	0.0	0.0	1.0	0.0	0.0	0.0	0.0	0.0	0.0	0.0	0.0	0.0	0.0	1	0	0	0	0
Phoenix	13.616508391072177	17.92259811624029	11.501374915094756	33.568102	-112.12107569999999	Tiffany's Nail Salon	AZ	9005 N 29th Ave Phoenix, AZ 85051	0.0	0.0	0.0	0	2	0	1	1	0	0.0	0.0	0.0	0.0	0.0	0.0	0.0	0.0	1.0	0.0	0.0	0.0	0.0	0.0	0.0	0.0	0.0	0.0	0.0	0.0	0.0	0.0	0.0	0.0	0.0	0.0	0.0	0	0	0	0	0
Phoenix	4.546437630197311	8.780468164535602	2.1166623981160093	33.492686	-112.07526899999999	National Dodgeball Organization	AZ	4000 N Central Ave Phoenix, AZ 85012	2.6390573296152584	1.791759469228055	0.0	0	2	0	1	0	0	0.0	0.0	0.0	0.0	0.0	0.0	0.0	0.0	0.0	0.0	0.0	0.0	0.0	0.0	0.0	0.0	0.0	0.0	0.0	0.0	0.0	0.0	0.0	0.0	0.0	0.0	0.0	0	0	0	0	0
Charlotte	1.477871081567666	28.613917330217514	4.445918091479276	35.220037	-80.856953	The Gallery	NC	1320 S Church St South End Charlotte, NC 28203	3.6888794541139363	1.791759469228055	0.0	2	0	0	1	1	1	0.0	1.0	0.0	1.0	0.0	0.0	0.0	1.0	1.0	0.0	0.0	0.0	0.0	0.0	1.0	0.0	1.0	0.0	0.0	0.0	0.0	0.0	0.0	0.0	0.0	0.0	0.0	0	0	0	1	0
Phoenix	4.198888962139677	10.51889877155555	5.776232805304781	33.450915	-112.119652	Rulis Window Tinting	AZ	2753 W Van Buren St Phoenix, AZ 85009	0.0	0.6931471805599453	0.0	0	2	0	1	0	0	0.0	0.0	0.0	0.0	0.0	0.0	0.0	0.0	0.0	0.0	0.0	0.0	0.0	0.0	0.0	0.0	0.0	0.0	0.0	0.0	0.0	0.0	0.0	0.0	0.0	0.0	0.0	0	0	0	0	0
Phoenix	18.60643601489657	18.29921143037754	15.842367602306028	33.6011167	-111.9834389	Sub Zero Ice Cream	AZ	Paradise Valley Mall 4568 E Cactus Rd Phoenix, AZ 85032	1.3862943611198906	0.0	0.0	0	2	0	0	1	0	0.0	0.0	0.0	0.0	0.0	0.0	0.0	0.0	1.0	0.0	0.0	0.0	0.0	0.0	0.0	0.0	0.0	0.0	0.0	0.0	0.0	0.0	0.0	0.0	0.0	0.0	0.0	0	0	0	0	0
Las Vegas	6.792848621791736	4.875552433432742	1.1070281300209224	36.1188126117146	-115.181993179531	Waitress World	NV	3993 Dean Martin Dr Las Vegas, NV 89103	2.0794415416798357	1.0986122886681098	0.0	0	2	0	1	1	0	0.0	0.0	0.0	0.0	0.0	0.0	0.0	0.0	1.0	0.0	0.0	0.0	0.0	0.0	0.0	0.0	0.0	0.0	0.0	0.0	0.0	0.0	0.0	0.0	0.0	0.0	0.0	0	0	0	0	0
Phoenix	24.27344949180784	27.60806055190851	21.87012394211454	33.6666997	-112.12330779999999	U-Swirl	AZ	3009 W Agua Fria Fwy Ste 3 Phoenix, AZ 85027	4.762173934797756	1.9459101490553132	0.0	0	2	0	1	0	0	0.0	0.0	0.0	0.0	0.0	0.0	0.0	0.0	1.0	0.0	0.0	0.0	0.0	0.0	0.0	0.0	0.0	0.0	1.0	0.0	0.0	0.0	0.0	0.0	0.0	0.0	0.0	0	0	0	0	0
Pittsburgh	6.0779788236988495	25.548919597752683	37.98539791815905	40.458696	-79.9322504	The Barbers Inn	PA	5744 Baum Blvd East Liberty Pittsburgh, PA 15206	1.3862943611198906	0.0	0.0	0	2	0	1	2	0	0.0	0.0	0.0	0.0	0.0	0.0	0.0	0.0	1.0	0.0	0.0	0.0	0.0	0.0	0.0	0.0	1.0	0.0	0.0	0.0	0.0	0.0	0.0	0.0	0.0	0.0	0.0	0	0	0	0	0
Las Vegas	16.172749086140033	7.8071101590355685	11.367182872193796	36.0220799	-115.1176257	Capriotti's Sandwich Shop	NV	9210 S Eastern Ave Ste 115 Southeast Las Vegas, NV 89123	4.31748811353631	2.3978952727983707	0.0	0	2	0	0	0	0	1.0	0.0	0.0	1.0	0.0	1.0	0.0	1.0	1.0	0.0	0.0	0.0	0.0	0.0	1.0	0.0	0.0	0.0	0.0	0.0	0.0	0.0	0.0	0.0	0.0	0.0	0.0	1	1	0	0	0
Phoenix	21.665721848528257	25.396727312689524	19.37796393121283	33.640693799999994	-112.13346940000001	Safeway Food & Drug	AZ	3450 W Bell Rd Phoenix, AZ 85053	4.2626798770413155	1.6094379124341003	0.0	0	2	0	1	1	0	0.0	0.0	0.0	0.0	0.0	0.0	0.0	0.0	1.0	0.0	0.0	0.0	0.0	0.0	0.0	0.0	0.0	0.0	0.0	0.0	0.0	0.0	0.0	0.0	0.0	0.0	0.0	0	0	0	0	0
Las Vegas	1.9625241128271433	8.311397947012017	5.520988832802986	36.1635704	-115.15697309999999	Nautica of Las Vegas	NV	705 S Grand Central Parkway Downtown Las Vegas, NV 89106	2.833213344056216	1.0986122886681098	0.0	0	2	0	1	1	0	0.0	0.0	0.0	0.0	0.0	0.0	0.0	0.0	1.0	0.0	0.0	0.0	0.0	0.0	0.0	0.0	0.0	0.0	0.0	0.0	0.0	0.0	0.0	0.0	0.0	0.0	0.0	0	0	0	0	0
Las Vegas	3.0366511154428695	6.267141793001506	3.59135715709425	36.1450382	-115.1555675	Fun City Motel	NV	2233 Las Vegas Blvd S Ste A The Strip Las Vegas, NV 89104	0.0	0.0	0.0	0	2	0	1	0	0	0.0	0.0	0.0	0.0	0.0	0.0	0.0	0.0	0.0	0.0	0.0	0.0	0.0	0.0	0.0	0.0	0.0	0.0	0.0	0.0	0.0	0.0	0.0	0.0	0.0	0.0	0.0	0	0	0	0	0
Phoenix	24.27910608712418	27.619870332283785	21.8776350428504	33.6666993	-112.12363549999999	Gamestop	AZ	3013 W Aqua Fria Fwy Phoenix, AZ 85027	2.995732273553991	0.6931471805599453	0.0	0	2	0	1	1	0	0.0	0.0	0.0	0.0	0.0	0.0	0.0	0.0	1.0	0.0	0.0	0.0	0.0	0.0	0.0	0.0	0.0	0.0	1.0	0.0	0.0	0.0	0.0	0.0	0.0	0.0	0.0	0	0	0	0	0
Las Vegas	0.5191918497592376	8.423455201011766	6.210893772146187	36.165653999999996	-115.14108799999998	Work in Progress	NV	317 S 6th St Downtown Las Vegas, NV 89101	3.5553480614894135	0.6931471805599453	0.0	0	2	0	1	0	0	0.0	0.0	0.0	0.0	0.0	0.0	0.0	0.0	1.0	0.0	0.0	0.0	0.0	0.0	0.0	0.0	0.0	0.0	0.0	0.0	0.0	0.0	0.0	0.0	0.0	0.0	0.0	0	0	0	0	0
Las Vegas	0.9064946290429755	8.540256278855194	6.147012004531675	36.1666292	-115.1456584	Capriotti's Sandwich Shop	NV	200 Lewis Ave Downtown Las Vegas, NV 89101	3.4657359027997265	1.791759469228055	0.0	2	2	0	1	1	0	0.0	0.0	0.0	1.0	0.0	0.0	0.0	1.0	1.0	0.0	0.0	0.0	0.0	0.0	1.0	0.0	0.0	0.0	0.0	0.0	0.0	0.0	0.0	0.0	0.0	0.0	0.0	1	1	0	0	0
Edinburgh	3.175209392162831	8.344691399442986	2.292080809430903	55.9381466	-3.231373	Gorgie Fish Bar	EDH	136-138 Gorgie Road Edinburgh EH11 2NS	0.0	0.0	0.0	0	2	0	1	0	0	1.0	0.0	0.0	0.0	0.0	0.0	0.0	0.0	0.0	1.0	0.0	0.0	0.0	0.0	0.0	0.0	0.0	0.0	0.0	0.0	0.0	0.0	0.0	0.0	0.0	0.0	0.0	1	0	1	0	0
Phoenix	16.425187751229018	17.81245544560904	13.641582454004054	33.5962271	-112.0359509	Noodle & Rice	AZ	2017 E Cactus Rd Ste G Phoenix, AZ 85022	5.91350300563827	3.8501476017100584	1.0986122886681098	2	2	0	0	0	0	1.0	0.0	0.0	0.0	1.0	1.0	1.0	1.0	1.0	1.0	0.0	0.0	0.0	0.0	1.0	0.0	0.0	0.0	1.0	0.0	0.0	0.0	0.0	0.0	0.0	0.0	0.0	1	0	0	0	0
Las Vegas	0.8794705954573799	9.471179349399806	7.3293731675790825	36.175	-115.136389	Love Jones	NV	Hard Rock Hotel & Casino 4455 Paradise Rd Las Vegas, NV 89136	1.791759469228055	0.0	0.0	0	2	0	1	2	0	0.0	0.0	0.0	0.0	0.0	0.0	0.0	0.0	1.0	0.0	0.0	0.0	0.0	0.0	0.0	0.0	0.0	1.0	0.0	1.0	0.0	0.0	0.0	0.0	0.0	0.0	0.0	0	0	0	0	0
Phoenix	25.950137857279714	28.748036139409155	23.413480657596903	33.6846493	-112.10051429999999	Masterwerks Tire and Auto	AZ	21824 N 19th Ave Phoenix, AZ 85027	1.9459101490553132	0.6931471805599453	0.0	0	2	0	1	0	0	0.0	0.0	0.0	0.0	0.0	0.0	0.0	0.0	0.0	0.0	0.0	0.0	0.0	0.0	0.0	0.0	0.0	0.0	0.0	0.0	0.0	0.0	0.0	0.0	0.0	0.0	0.0	0	0	0	0	0
Madison	7.541766813901208	15.369680794918985	6.773740402988448	43.0469205	-89.4770529	Babes Grill & Bar	WI	5614 Schroeder Rd Madison, WI 53711	4.499809670330265	2.6390573296152584	0.0	0	1	0	0	1	0	0.0	1.0	0.0	1.0	1.0	0.0	1.0	1.0	1.0	1.0	0.0	0.0	0.0	0.0	1.0	0.0	0.0	0.0	1.0	0.0	0.0	0.0	0.0	0.0	0.0	0.0	0.0	1	0	0	0	0
Madison	4.9151561636034655	3.7515224405705863	5.3758734504661545	43.1137364	-89.3637805	QQ Asian Buffet	WI	1291 N Sherman Ave Madison, WI 53704	2.1972245773362196	0.0	0.0	2	2	0	1	1	0	1.0	0.0	0.0	1.0	0.0	0.0	1.0	1.0	1.0	0.0	0.0	0.0	0.0	0.0	1.0	0.0	0.0	0.0	1.0	0.0	0.0	0.0	0.0	0.0	0.0	0.0	0.0	1	0	0	0	0
Edinburgh	0.7767125358193743	9.903155001187903	0.5532910004898445	55.95348489999999	-3.2006938	Charlie Miller	EDH	39 Frederick Street New Town Edinburgh EH2 1EP	0.0	0.0	0.0	0	2	0	1	2	0	0.0	0.0	0.0	0.0	0.0	0.0	0.0	0.0	1.0	0.0	0.0	0.0	0.0	0.0	0.0	0.0	1.0	0.0	0.0	0.0	0.0	0.0	0.0	0.0	0.0	0.0	0.0	0	0	0	0	0
Las Vegas	0.9048075770771831	8.228765859627769	6.611174165177756	36.162966	-115.12693200000001	ABC Discount Upholstery	NV	1700 Fremont St Downtown Las Vegas, NV 89101	1.6094379124341003	0.6931471805599453	0.0	0	2	0	1	0	0	0.0	0.0	0.0	0.0	0.0	0.0	0.0	0.0	1.0	0.0	0.0	0.0	0.0	0.0	0.0	0.0	0.0	0.0	0.0	0.0	0.0	0.0	0.0	0.0	0.0	0.0	0.0	0	0	0	0	0
Las Vegas	10.59263930360055	10.182894716914275	6.750585956717813	36.129084000000006	-115.243567	Infinite Realty & Investments	NV	3311 S Rainbow Blvd Ste 127 Westside Las Vegas, NV 89146	2.302585092994046	0.0	0.0	0	2	0	1	0	0	0.0	0.0	0.0	0.0	0.0	0.0	0.0	0.0	0.0	0.0	0.0	0.0	0.0	0.0	0.0	0.0	0.0	0.0	0.0	0.0	0.0	0.0	0.0	0.0	0.0	0.0	0.0	0	0	0	0	0
Las Vegas	16.66875682260023	17.955389501715427	14.424475765393968	36.1606428	-115.32068500000001	Lacquer Me Up	NV	10300 W Charleston Blvd Ste 17 Summerlin Las Vegas, NV 89135	3.2188758248682006	1.791759469228055	0.6931471805599453	0	2	0	1	1	0	0.0	0.0	0.0	0.0	0.0	0.0	0.0	0.0	1.0	0.0	0.0	0.0	0.0	0.0	0.0	0.0	0.0	0.0	1.0	0.0	0.0	0.0	0.0	0.0	0.0	0.0	0.0	0	0	0	0	0
Las Vegas	13.760352436160943	15.224151504188915	11.59954522685603	36.1579701982433	-115.28811466233499	Whole Foods Market	NV	8855 W Charleston Blvd Westside Las Vegas, NV 89117	8.09925056179696	5.272999558563747	1.791759469228055	0	2	0	1	2	0	0.0	0.0	0.0	0.0	0.0	0.0	0.0	0.0	1.0	0.0	0.0	0.0	0.0	0.0	0.0	0.0	0.0	0.0	1.0	0.0	0.0	0.0	0.0	0.0	0.0	0.0	0.0	0	0	0	0	0
Las Vegas	20.282668833733005	13.898268490100829	13.798404742744184	36.0202684	-115.2697436	EDGE Fitness 24/7 & Tanning	NV	8180 Blue Diamond Rd Ste 150 Southwest Las Vegas, NV 89139	7.02197642307216	2.4849066497880004	0.0	0	2	0	1	1	0	0.0	0.0	0.0	0.0	0.0	0.0	0.0	0.0	1.0	0.0	0.0	0.0	0.0	0.0	0.0	0.0	0.0	0.0	1.0	0.0	0.0	0.0	0.0	0.0	0.0	0.0	0.0	0	0	0	0	0
Phoenix	9.982838891317616	14.269679065090704	7.801676649382293	33.5386031	-112.10246289999999	Harris & Sons Tree Specialist	AZ	2011 W Glendale Ave Phoenix, AZ 85021	0.0	0.0	0.0	0	2	0	1	0	0	0.0	0.0	0.0	0.0	0.0	0.0	0.0	0.0	1.0	0.0	0.0	0.0	0.0	0.0	0.0	0.0	0.0	0.0	0.0	0.0	0.0	0.0	0.0	0.0	0.0	0.0	0.0	0	0	0	0	0
Las Vegas	13.899307394432185	9.279543307098024	7.769327942515501	36.077330200000006	-115.2432798	Wondrous Hair by Maurees	NV	Touch Salon 6115 S Rainbow Blvd, Ste 104 Spring Valley Las Vegas, NV 89118	2.833213344056216	1.791759469228055	0.0	0	2	0	1	1	0	0.0	0.0	0.0	0.0	0.0	0.0	0.0	1.0	1.0	0.0	0.0	0.0	0.0	0.0	0.0	0.0	0.0	0.0	1.0	0.0	0.0	0.0	0.0	0.0	0.0	0.0	0.0	0	0	0	0	0
Pittsburgh	4.07206421522801	24.36031469767841	40.76406762998592	40.466465	-79.964876	Sugar Boutique	PA	3703 Butler St Ste 4 Lawrenceville Pittsburgh, PA 15201	0.0	0.0	0.0	0	2	0	1	1	0	0.0	0.0	0.0	0.0	0.0	0.0	0.0	0.0	1.0	0.0	0.0	0.0	0.0	0.0	0.0	0.0	0.0	0.0	0.0	0.0	0.0	0.0	0.0	0.0	0.0	0.0	0.0	0	0	0	0	0
Edinburgh	0.1774943606537267	10.656097972520518	0.9941879283471229	55.954842500000005	-3.1884308	Sweet Mountains	EDH	St James Shopping Centre New Town Edinburgh EH1 3SL	0.0	0.0	0.0	0	2	0	1	0	0	0.0	0.0	0.0	0.0	0.0	0.0	0.0	0.0	0.0	0.0	0.0	0.0	0.0	0.0	0.0	0.0	0.0	0.0	0.0	0.0	0.0	0.0	0.0	0.0	0.0	0.0	0.0	0	0	0	0	0
Pittsburgh	5.465159578347367	25.415182790242174	39.210275417397966	40.4653251	-79.943809	Kraynick's Bike Shop	PA	5003 Penn Ave Garfield Pittsburgh, PA 15224	1.9459101490553132	1.0986122886681098	0.0	0	2	0	1	0	0	0.0	0.0	0.0	0.0	0.0	0.0	0.0	0.0	0.0	0.0	0.0	0.0	0.0	0.0	0.0	0.0	1.0	0.0	0.0	0.0	0.0	0.0	0.0	0.0	0.0	0.0	0.0	0	0	0	0	0
Charlotte	11.777510993676515	25.871628521990008	12.423512233824868	35.3001065	-80.7526901	Microtel Inn by Wyndham Charlotte/University Place	NC	132 East Mccullough Drive University City Charlotte, NC 28262	0.0	0.0	0.0	0	2	0	0	1	0	0.0	0.0	0.0	0.0	0.0	0.0	0.0	0.0	1.0	0.0	0.0	0.0	0.0	0.0	0.0	0.0	0.0	0.0	0.0	0.0	0.0	0.0	0.0	0.0	0.0	0.0	0.0	0	0	0	0	0
Pittsburgh	1.8527684055516414	22.125600188541508	41.18068114710044	40.451567600000004	-79.9826937	The Pittsburgh Popcorn Company	PA	209 21st St Strip District Pittsburgh, PA 15222	5.159055299214529	2.302585092994046	0.0	0	2	0	1	0	0	0.0	0.0	0.0	0.0	0.0	0.0	0.0	0.0	1.0	0.0	0.0	0.0	0.0	0.0	0.0	0.0	1.0	0.0	0.0	0.0	0.0	0.0	0.0	0.0	0.0	0.0	0.0	0	0	0	0	0
Las Vegas	14.009738771905148	16.089696907261462	12.387653225141687	36.1687144	-115.29129920000001	SC Prime Steakhouse	NV	9090 Alta Dr Westside Las Vegas, NV 89145	4.5217885770490405	2.772588722239781	0.0	0	1	1	1	2	0	0.0	0.0	0.0	1.0	1.0	0.0	1.0	0.0	1.0	1.0	0.0	0.0	0.0	0.0	0.0	0.0	0.0	1.0	1.0	0.0	0.0	0.0	0.0	0.0	0.0	0.0	0.0	1	0	0	0	0
Las Vegas	2.7735558628968846	5.826773911624002	4.2675517728194645	36.1421275	-115.13692409999999	Harris Real Estate University	NV	2620 S Maryland Pkwy Eastside Las Vegas, NV 89109	0.0	0.0	0.0	0	2	0	1	0	0	0.0	0.0	0.0	0.0	0.0	0.0	0.0	0.0	0.0	0.0	0.0	0.0	0.0	0.0	0.0	0.0	0.0	0.0	0.0	0.0	0.0	0.0	0.0	0.0	0.0	0.0	0.0	0	0	0	0	0
Phoenix	12.06270760965862	17.48566141414133	10.680139679390848	33.539626075006396	-112.15089942764901	Brighton Collision Center	AZ	7101 N 43rd Ave Phoenix, AZ 85051	0.0	0.0	0.0	0	2	0	1	0	0	0.0	0.0	0.0	0.0	0.0	0.0	0.0	0.0	0.0	0.0	0.0	0.0	0.0	0.0	0.0	0.0	0.0	0.0	0.0	0.0	0.0	0.0	0.0	0.0	0.0	0.0	0.0	0	0	0	0	0
Edinburgh	1.2263493575915916	9.54693534773303	0.48977522764835146	55.9500765	-3.2070648	Hendersons at St John's	EDH	3 Lothian Road Old Town Edinburgh EH2 4BJ	1.9459101490553132	1.0986122886681098	0.0	0	2	0	1	1	0	0.0	0.0	0.0	1.0	0.0	0.0	0.0	1.0	1.0	0.0	0.0	0.0	0.0	0.0	1.0	0.0	0.0	0.0	0.0	0.0	0.0	0.0	0.0	0.0	0.0	0.0	0.0	1	0	0	0	0
Las Vegas	8.767350332591516	8.109756373973722	4.557720161027085	36.1265452	-115.21920759999999	Sunfood Market	NV	5700 Spring Mountain Road Chinatown Las Vegas, NV 89146	2.70805020110221	0.0	0.0	0	2	0	1	1	0	0.0	0.0	0.0	0.0	0.0	0.0	0.0	0.0	1.0	0.0	0.0	0.0	0.0	0.0	0.0	0.0	0.0	0.0	1.0	0.0	0.0	0.0	0.0	0.0	0.0	0.0	0.0	0	0	0	0	0
Edinburgh	1.1998775736009428	11.684433041890314	2.083597755650524	55.958673700000006	-3.1716669	A & A Traders	EDH	56-60 Easter Road Leith Edinburgh EH7 5RQ	0.0	0.0	0.0	0	2	0	1	1	0	0.0	0.0	0.0	0.0	0.0	0.0	0.0	0.0	0.0	0.0	0.0	0.0	0.0	0.0	0.0	0.0	0.0	0.0	0.0	0.0	0.0	0.0	0.0	0.0	0.0	0.0	0.0	0	0	0	0	0
Phoenix	5.74942002996715	6.019533387808814	3.4884859509715778	33.488164000000005	-112.03053799999999	Vaquero's Carne Asada	AZ	3414 N 24th St Phoenix, AZ 85016	2.8903717578961645	1.3862943611198906	0.0	1	2	0	1	1	0	0.0	1.0	1.0	1.0	0.0	0.0	0.0	1.0	1.0	0.0	0.0	0.0	0.0	0.0	1.0	0.0	0.0	0.0	0.0	0.0	0.0	0.0	0.0	0.0	0.0	0.0	0.0	1	0	1	0	0
Phoenix	14.41566187082797	18.743807863643	12.320164985212681	33.574346000000006	-112.12585630000001	Best Nails	AZ	9610 N Metro Pkwy W Phoenix, AZ 85051	2.1972245773362196	0.6931471805599453	0.0	0	2	0	1	0	0	0.0	0.0	0.0	0.0	0.0	0.0	0.0	0.0	1.0	0.0	0.0	0.0	0.0	0.0	0.0	0.0	0.0	0.0	0.0	0.0	0.0	0.0	0.0	0.0	0.0	0.0	0.0	0	0	0	0	0
Phoenix	12.981837644917006	7.867001712081918	14.324441294141954	33.3737033715867	-111.970436941468	The Lobby Grill	AZ	8000 S Arizona Grand Pkwy Phoenix, AZ 85044	4.74493212836325	2.3978952727983707	0.0	0	1	0	0	1	0	0.0	1.0	0.0	1.0	1.0	0.0	1.0	1.0	1.0	1.0	0.0	0.0	0.0	0.0	1.0	0.0	0.0	0.0	1.0	0.0	0.0	0.0	0.0	0.0	0.0	0.0	0.0	1	0	0	0	0
Charlotte	1.07007701444155	26.543226554291326	2.4404419390550065	35.2140232	-80.8353929	Wendy's	NC	715 Charlottetowne Ave Myers Park Charlotte, NC 28204	4.499809670330265	1.0986122886681098	0.0	1	2	0	1	0	0	0.0	0.0	1.0	1.0	0.0	0.0	0.0	1.0	1.0	0.0	0.0	0.0	0.0	0.0	1.0	0.0	0.0	0.0	0.0	0.0	0.0	0.0	0.0	0.0	0.0	0.0	0.0	1	0	1	0	0
Las Vegas	10.1046772880675	17.409376163312636	13.956371242661774	36.23728551662639	-115.20719016592301	Kid's Co Op Preschool & Kindergarten	NV	4316 N Decatur Blvd Northwest Las Vegas, NV 89032	0.0	0.6931471805599453	0.0	0	2	0	1	0	0	0.0	0.0	0.0	0.0	0.0	0.0	0.0	0.0	0.0	0.0	0.0	0.0	0.0	0.0	0.0	0.0	0.0	0.0	0.0	0.0	0.0	0.0	0.0	0.0	0.0	0.0	0.0	0	0	0	0	0
Phoenix	14.615802458838617	15.000157255149077	11.828037221095988	33.5725815	-112.0118669	Bayliff Integrated Wellness, LLC	AZ	Phoenix, AZ 85028	0.0	0.0	0.0	0	2	0	1	0	0	0.0	0.0	0.0	0.0	0.0	0.0	0.0	0.0	0.0	0.0	0.0	0.0	0.0	0.0	0.0	0.0	0.0	0.0	0.0	0.0	0.0	0.0	0.0	0.0	0.0	0.0	0.0	0	0	0	0	0
Las Vegas	7.055638815919432	5.1748762327380895	1.48229270109743	36.118699	-115.186442	Pho Da Nang	NV	3700 W Flamingo Rd Las Vegas, NV 89103	5.0689042022202315	2.3978952727983707	0.6931471805599453	1	2	0	1	1	0	0.0	0.0	0.0	1.0	1.0	0.0	0.0	1.0	1.0	0.0	0.0	0.0	0.0	0.0	1.0	0.0	0.0	0.0	0.0	1.0	0.0	0.0	0.0	0.0	0.0	0.0	0.0	1	0	0	0	0
Las Vegas	15.767066444343707	14.517781397236927	11.582789678319731	36.116375	-115.29924299999999	Academy Of Dental Careers	NV	9500 W Flamingo Rd Ste 200 Spring Valley Las Vegas, NV 89147	0.0	1.3862943611198906	0.0	0	2	0	1	0	0	0.0	0.0	0.0	0.0	0.0	0.0	0.0	0.0	0.0	0.0	0.0	0.0	0.0	0.0	0.0	0.0	0.0	0.0	0.0	0.0	0.0	0.0	0.0	0.0	0.0	0.0	0.0	0	0	0	0	0
Las Vegas	6.9007578656851525	5.789050955113015	2.0126602354928624	36.1235594	-115.19034939999999	Rancho Vista Apartments	NV	3663 S Valley View Chinatown Las Vegas, NV 89103	0.0	0.0	0.0	0	2	0	1	0	0	0.0	0.0	0.0	0.0	0.0	0.0	0.0	0.0	0.0	0.0	0.0	0.0	0.0	0.0	0.0	0.0	0.0	0.0	0.0	0.0	0.0	0.0	0.0	0.0	0.0	0.0	0.0	0	0	0	0	0
Las Vegas	16.631076595110468	10.4580686292992	10.14282141021192	36.0458007	-115.2440943	A Dream Jumper	NV	7835 S Rainbow Blvd Ste 4-101 Southwest Las Vegas, NV 89139	0.0	0.0	0.0	0	2	0	1	0	0	0.0	0.0	0.0	0.0	0.0	0.0	0.0	0.0	1.0	0.0	0.0	0.0	0.0	0.0	0.0	0.0	0.0	0.0	0.0	0.0	0.0	0.0	0.0	0.0	0.0	0.0	0.0	0	0	0	0	0
Las Vegas	7.220628420902937	3.6161668436352814	0.6473889563863287	36.109621999999995	-115.17321240000001	EATDRINK	NV	Cosmopolitan Hotel and Casino 3708 Las Vegas Blvd S The Strip Las Vegas, NV 89109	2.0794415416798357	0.0	0.0	0	2	0	1	2	0	0.0	0.0	0.0	0.0	0.0	0.0	0.0	0.0	1.0	0.0	0.0	0.0	0.0	0.0	0.0	0.0	0.0	0.0	0.0	0.0	0.0	0.0	0.0	0.0	0.0	0.0	0.0	0	0	0	0	0
Phoenix	16.49290227461629	15.422412042917545	19.06921520777533	33.3039604	-112.05435020000002	Desert Foothills Ace Hardware	AZ	1335 E Chandler Blvd Phoenix, AZ 85048	3.6635616461296463	1.0986122886681098	0.0	0	2	0	1	1	0	0.0	0.0	0.0	0.0	0.0	0.0	0.0	0.0	1.0	0.0	0.0	0.0	0.0	0.0	0.0	0.0	1.0	0.0	0.0	0.0	0.0	0.0	0.0	0.0	0.0	0.0	0.0	0	0	0	0	0
Madison	2.4828451545231593	7.0531658592691775	3.30251826323398	43.082001	-89.363792	Epic Painting	WI	1137 Jenifer St Williamson - Marquette Madison, WI 53703	0.0	0.0	0.0	0	2	0	1	0	0	0.0	0.0	0.0	0.0	0.0	0.0	0.0	0.0	0.0	0.0	0.0	0.0	0.0	0.0	0.0	0.0	0.0	0.0	0.0	0.0	0.0	0.0	0.0	0.0	0.0	0.0	0.0	0	0	0	0	0
Phoenix	34.58845612072506	36.656527075355186	31.9354474291104	33.7635354	-112.0714835	Howland Studios	AZ	Phoenix, AZ 85085	0.0	0.0	0.0	0	2	0	1	0	0	0.0	0.0	0.0	0.0	0.0	0.0	0.0	0.0	1.0	0.0	0.0	0.0	0.0	0.0	0.0	0.0	0.0	0.0	0.0	0.0	0.0	0.0	0.0	0.0	0.0	0.0	0.0	0	0	0	0	0
Las Vegas	9.10353927650559	5.873553552092865	8.555982359550457	36.0999984741211	-115.077407836914	Sin City Family Hair	NV	4425 E Tropicana Ste H Eastside Las Vegas, NV 89118	0.0	0.0	0.0	0	2	0	1	0	0	0.0	0.0	0.0	0.0	0.0	0.0	0.0	1.0	1.0	0.0	0.0	0.0	0.0	0.0	0.0	0.0	0.0	0.0	0.0	0.0	0.0	0.0	0.0	0.0	0.0	0.0	0.0	0	0	0	0	0
Madison	4.0204013388312445	5.627482718219948	4.77653833409675	43.093111	-89.35003420000001	Full Circle Holistic Veterinary Care	WI	2138 Atwood Ave Schenk - Atwood Madison, WI 53704	0.0	0.0	0.0	0	2	0	1	0	0	0.0	0.0	0.0	0.0	0.0	0.0	0.0	0.0	0.0	0.0	0.0	0.0	0.0	0.0	0.0	0.0	0.0	0.0	0.0	0.0	0.0	0.0	0.0	0.0	0.0	0.0	0.0	0	0	0	0	0
Las Vegas	9.312703120905015	4.618100648391463	2.7997143173431818	36.096712592420204	-115.19194794754401	Mcm Fab & Design	NV	3935 West Reno Ave Ste G Las Vegas, NV 89118	0.0	0.0	0.0	0	2	0	1	0	0	0.0	0.0	0.0	0.0	0.0	0.0	0.0	0.0	1.0	0.0	0.0	0.0	0.0	0.0	0.0	0.0	0.0	0.0	0.0	0.0	0.0	0.0	0.0	0.0	0.0	0.0	0.0	0	0	0	0	0
Pittsburgh	0.18345508382556458	20.33596202118884	42.152053030837884	40.4426547	-80.0022505	Starbucks	PA	202 6th St Downtown Pittsburgh, PA 15222	6.111467339502679	1.9459101490553132	0.6931471805599453	0	2	0	0	1	0	0.0	1.0	0.0	0.0	0.0	0.0	0.0	0.0	1.0	0.0	0.0	0.0	0.0	0.0	0.0	0.0	1.0	0.0	0.0	0.0	0.0	0.0	0.0	0.0	0.0	0.0	0.0	0	0	0	0	0
Las Vegas	6.2566679787988315	4.106446462519469	0.3592534178136388	36.1182919	-115.170409	The Rockhouse	NV	3535 S Las Vegas Blvd The Strip Las Vegas, NV 89109	5.978885764901122	3.6888794541139363	0.0	3	1	0	1	1	2	0.0	0.0	0.0	1.0	1.0	0.0	0.0	0.0	1.0	0.0	1.0	1.0	0.0	0.0	0.0	0.0	0.0	0.0	0.0	1.0	0.0	1.0	0.0	0.0	0.0	0.0	0.0	0	0	0	1	0
Phoenix	21.060885794650883	22.81781417306829	18.327408645134952	33.6402988	-112.04815590000001	Apartment Finders	AZ	1601 E Bell Rd Ste A7 Phoenix, AZ 85022	0.0	0.6931471805599453	0.0	0	2	0	1	0	0	0.0	0.0	0.0	0.0	0.0	0.0	0.0	0.0	0.0	0.0	0.0	0.0	0.0	0.0	0.0	0.0	0.0	0.0	0.0	0.0	0.0	0.0	0.0	0.0	0.0	0.0	0.0	0	0	0	0	0
Phoenix	13.771399207554884	20.153404970419427	14.562209914608985	33.4679027714696	-112.221367879793	Golden Thai Kitchen	AZ	1820 N 75th Ave Ste 110 Phoenix, AZ 85035	5.318119993844216	3.6109179126442243	0.0	2	2	0	1	0	0	0.0	0.0	0.0	1.0	0.0	0.0	1.0	1.0	1.0	0.0	0.0	0.0	0.0	0.0	1.0	0.0	0.0	0.0	0.0	0.0	0.0	0.0	0.0	0.0	0.0	0.0	0.0	1	0	0	0	0
Las Vegas	15.468576576536849	7.125261964861256	10.722177320196513	36.0284419	-115.11783359999998	Z Chicken	NV	8846 S Eastern Ave Unit 102 Southeast Las Vegas, NV 89123	3.7376696182833684	1.0986122886681098	1.0986122886681098	2	2	0	1	0	0	0.0	0.0	0.0	1.0	1.0	0.0	0.0	1.0	1.0	0.0	0.0	0.0	0.0	0.0	1.0	0.0	0.0	0.0	1.0	0.0	0.0	0.0	0.0	0.0	0.0	0.0	0.0	1	0	0	0	0
Phoenix	20.913665743338953	22.881422267755422	18.20530987566135	33.639636200000005	-112.05624009999998	Fresh & Easy	AZ	1209 E Bell Rd Phoenix, AZ 85022	5.940171252720432	2.5649493574615367	0.0	0	2	0	1	1	0	0.0	0.0	0.0	0.0	0.0	0.0	0.0	0.0	1.0	0.0	0.0	0.0	0.0	0.0	0.0	0.0	0.0	0.0	1.0	0.0	0.0	0.0	0.0	0.0	0.0	0.0	0.0	0	0	0	0	0
Phoenix	11.857952488801619	17.672054493783513	10.888611270354575	33.527479666129	-112.164506835937	Mr Lockout LLC	AZ	Phoenix, AZ 85063	0.0	0.6931471805599453	0.0	0	2	0	1	0	0	0.0	0.0	0.0	0.0	0.0	0.0	0.0	0.0	1.0	0.0	0.0	0.0	0.0	0.0	0.0	0.0	0.0	0.0	0.0	0.0	0.0	0.0	0.0	0.0	0.0	0.0	0.0	0	0	0	0	0
Las Vegas	18.059094891392306	13.602736262001079	12.151157800676499	36.0616516060615	-115.288387010837	Kaizen Life Group	NV	Spring Valley Las Vegas, NV 89148	0.0	0.0	0.0	0	2	0	1	0	0	0.0	0.0	0.0	0.0	0.0	0.0	0.0	0.0	1.0	0.0	0.0	0.0	0.0	0.0	0.0	0.0	0.0	0.0	0.0	0.0	0.0	0.0	0.0	0.0	0.0	0.0	0.0	0	0	0	0	0
Madison	8.664891059620995	3.3154165048341384	9.339760556538984	43.12434867024421	-89.3103886395693	Baymont Inn And Suites Madison	WI	4202 E Towne Blvd Madison, WI 53704	1.3862943611198906	0.0	0.0	0	2	0	0	0	0	0.0	0.0	0.0	0.0	0.0	0.0	0.0	0.0	1.0	0.0	0.0	0.0	0.0	0.0	0.0	0.0	0.0	0.0	0.0	0.0	0.0	0.0	0.0	0.0	0.0	0.0	0.0	0	0	0	0	0
Edinburgh	2.2288257603307016	11.278884370786928	2.968552061987588	55.9726312	-3.1793302000000003	Leith Mills	EDH	70-74 Bangor Road Leith Edinburgh EH6 5JU	0.0	0.6931471805599453	0.0	0	2	0	1	0	0	0.0	0.0	0.0	0.0	0.0	0.0	0.0	0.0	0.0	0.0	0.0	0.0	0.0	0.0	0.0	0.0	0.0	0.0	0.0	0.0	0.0	0.0	0.0	0.0	0.0	0.0	0.0	0	0	0	0	0
Phoenix	27.016050360029276	23.304135814110893	24.83719530086598	33.589621	-111.8348037	Sunbelt Electric	AZ	4727 E Bell Rd Ste 45257 Phoenix, AZ 85032	0.0	0.0	0.0	0	2	0	1	0	0	0.0	0.0	0.0	0.0	0.0	0.0	0.0	0.0	1.0	0.0	0.0	0.0	0.0	0.0	0.0	0.0	0.0	0.0	0.0	0.0	0.0	0.0	0.0	0.0	0.0	0.0	0.0	0	0	0	0	0
Las Vegas	4.941099031336653	13.485592872119279	10.97015983437867	36.211271	-115.142556	J or J Welder	NV	2870 N Commerce St Las Vegas, NV 89030	0.0	0.6931471805599453	0.0	0	2	0	1	0	0	0.0	0.0	0.0	0.0	0.0	0.0	0.0	0.0	1.0	0.0	0.0	0.0	0.0	0.0	0.0	0.0	0.0	0.0	0.0	0.0	0.0	0.0	0.0	0.0	0.0	0.0	0.0	0	0	0	0	0
Phoenix	7.38270349146187	8.064192629778397	4.7280381315538715	33.50741	-112.031029	Safeway	AZ	810 E. Glendale Ave. Phoenix, AZ 85016	4.51085950651685	1.0986122886681098	0.0	0	2	0	1	0	0	0.0	0.0	0.0	0.0	0.0	0.0	0.0	0.0	1.0	0.0	0.0	0.0	0.0	0.0	0.0	0.0	0.0	0.0	1.0	0.0	0.0	0.0	0.0	0.0	0.0	0.0	0.0	0	0	0	0	0
Las Vegas	20.506471920130718	12.319626197743267	14.120468518603678	35.990495	-115.202678	Goett Family Park	NV	10950 Southern Highlands Pkwy Southwest Las Vegas, NV 89141	5.147494476813453	1.791759469228055	0.0	0	2	0	1	0	0	0.0	0.0	0.0	0.0	0.0	0.0	0.0	1.0	0.0	0.0	0.0	0.0	0.0	0.0	0.0	0.0	0.0	0.0	0.0	0.0	0.0	0.0	0.0	0.0	0.0	0.0	0.0	0	0	0	0	0
Edinburgh	4.7279231055877915	7.916708888275644	3.8423022718106625	55.9267814	-3.2474286	World of Bowling	EDH	Edinburgh Corn Exchange 11 Newmarket Road Edinburgh EH14 1RJ	1.791759469228055	0.0	0.0	0	2	0	1	0	0	0.0	0.0	0.0	0.0	0.0	0.0	0.0	1.0	0.0	0.0	0.0	0.0	0.0	0.0	0.0	0.0	0.0	0.0	0.0	0.0	0.0	0.0	0.0	0.0	0.0	0.0	0.0	0	0	0	0	0
Las Vegas	16.64847139700714	8.249685918154766	11.76743221530212	36.0176758	-115.1188775	T-Bird Lounge & Restaurant	NV	9465 S Eastern Ave Southeast Las Vegas, NV 89123	6.20050917404269	4.110873864173311	0.6931471805599453	0	1	0	0	0	2	0.0	0.0	0.0	1.0	1.0	0.0	1.0	1.0	1.0	0.0	1.0	0.0	0.0	0.0	1.0	0.0	0.0	0.0	1.0	0.0	0.0	0.0	0.0	0.0	0.0	0.0	0.0	1	0	0	1	0
Edinburgh	2.3249498059186497	11.51519557697669	3.1007804552530702	55.972880599999996	-3.1755716	La Dolce Vita	EDH	Great Junction St Leith Leith Edinburgh EH6 5	0.0	0.0	0.0	0	2	0	1	0	0	0.0	0.0	0.0	0.0	0.0	0.0	0.0	1.0	0.0	0.0	0.0	0.0	0.0	0.0	1.0	0.0	0.0	0.0	0.0	0.0	0.0	0.0	0.0	0.0	0.0	0.0	0.0	1	0	0	0	0
Madison	8.628669022260151	3.1260751357209124	9.292667241473398	43.1254222	-89.312196	Topper's Pizza	WI	4128 E Washington Ave Norman Acres Madison, WI 53704	2.995732273553991	1.3862943611198906	0.0	0	2	0	0	1	0	1.0	0.0	0.0	1.0	1.0	1.0	0.0	1.0	1.0	0.0	0.0	0.0	0.0	0.0	1.0	0.0	0.0	0.0	1.0	0.0	0.0	0.0	0.0	0.0	0.0	0.0	0.0	1	0	0	0	1
Phoenix	6.63624542612564	9.659027915072214	3.9022434371176087	33.510822999999995	-112.063534	Northlight Counseling Associates	AZ	5050 N 8th Pl Phoenix, AZ 85014	0.0	0.0	0.0	0	2	0	1	0	0	0.0	0.0	0.0	0.0	0.0	0.0	0.0	0.0	0.0	0.0	0.0	0.0	0.0	0.0	0.0	0.0	0.0	0.0	0.0	0.0	0.0	0.0	0.0	0.0	0.0	0.0	0.0	0	0	0	0	0
Charlotte	2.982959050731363	30.286094601802596	6.127741086808575	35.227150099999996	-80.8732724	News Talk 1110 WBT 99.3 FM	NC	1 Julian Price Place Charlotte, NC 28208	2.302585092994046	0.0	0.0	0	2	0	1	0	0	0.0	0.0	0.0	0.0	0.0	0.0	0.0	0.0	0.0	0.0	0.0	0.0	0.0	0.0	0.0	0.0	0.0	0.0	0.0	0.0	0.0	0.0	0.0	0.0	0.0	0.0	0.0	0	0	0	0	0
Phoenix	14.40695208743735	18.729421437972167	12.30859452483362	33.574335	-112.12561000000001	AJ's Mongolian BBQ	AZ	9620 N Metro Pkwy W Phoenix, AZ 85051	4.51085950651685	1.791759469228055	0.0	0	2	0	0	0	0	0.0	0.0	0.0	1.0	1.0	0.0	0.0	1.0	1.0	0.0	0.0	0.0	0.0	0.0	1.0	0.0	0.0	0.0	1.0	0.0	0.0	0.0	0.0	0.0	0.0	0.0	0.0	1	0	0	0	0
Las Vegas	15.446098616687006	19.46834219555649	15.62960368047359	36.209934600000004	-115.29898909999999	SunShine Nails	NV	9424 Del Webb BLVD Summerlin Las Vegas, NV 89134	3.828641396489095	1.0986122886681098	0.0	0	2	0	1	1	0	0.0	0.0	0.0	0.0	0.0	0.0	0.0	0.0	1.0	0.0	0.0	0.0	0.0	0.0	0.0	0.0	0.0	0.0	1.0	0.0	0.0	0.0	0.0	0.0	0.0	0.0	0.0	0	0	0	0	0
Pittsburgh	0.061419107839997426	20.373560968706965	41.90867807080071	40.4416426	-79.999706	GNC	PA	550 Wood St Downtown Pittsburgh, PA 15222	3.1354942159291497	0.6931471805599453	0.0	0	2	0	1	1	0	0.0	0.0	0.0	0.0	0.0	0.0	0.0	0.0	0.0	0.0	0.0	0.0	0.0	0.0	0.0	0.0	0.0	0.0	0.0	0.0	0.0	0.0	0.0	0.0	0.0	0.0	0.0	0	0	0	0	0
Madison	9.20667227875672	3.3210525441481185	9.87251994104543	43.1284594	-89.3063978	Outback Steakhouse	WI	4520 East Towne Blvd Madison, WI 53704	4.127134385045092	1.6094379124341003	0.0	0	1	0	1	1	0	0.0	0.0	0.0	1.0	1.0	1.0	1.0	1.0	1.0	1.0	0.0	0.0	0.0	0.0	1.0	0.0	0.0	0.0	1.0	0.0	0.0	0.0	0.0	0.0	0.0	0.0	0.0	1	0	0	0	0
Edinburgh	0.3218564349551466	10.823403202963865	0.8618549812785504	55.9505581	-3.1863938	Shamoli Thai & Indian Cuisine	EDH	Royal Mile 105 High St Fl 1 Old Town Edinburgh EH1 1SG	0.0	0.0	0.0	0	1	0	1	1	0	0.0	0.0	0.0	1.0	0.0	1.0	1.0	1.0	1.0	1.0	0.0	0.0	0.0	0.0	1.0	0.0	0.0	0.0	0.0	0.0	0.0	0.0	0.0	0.0	0.0	0.0	0.0	1	0	0	0	0
Las Vegas	12.133456298077743	8.997929865804434	6.570090064152476	36.098634032773	-115.24070479629499	Therapie	NV	6819 W. Tropicana Ave #200 Spring Valley Las Vegas, NV 89103	3.258096538021482	1.0986122886681098	0.0	0	2	0	1	1	0	0.0	0.0	0.0	0.0	0.0	0.0	0.0	0.0	1.0	0.0	0.0	0.0	0.0	0.0	0.0	0.0	0.0	0.0	1.0	0.0	0.0	0.0	0.0	0.0	0.0	0.0	0.0	0	0	0	0	0
Phoenix	8.141134875065099	11.463804379213984	10.915389674317197	33.3866540891369	-112.11505955980199	Val's Mobile Grooming	AZ	3206 W Apollo Rd Phoenix, AZ 85041	0.0	0.6931471805599453	0.0	0	2	0	1	0	0	0.0	0.0	0.0	0.0	0.0	0.0	0.0	0.0	0.0	0.0	0.0	0.0	0.0	0.0	0.0	0.0	0.0	0.0	0.0	0.0	0.0	0.0	0.0	0.0	0.0	0.0	0.0	0	0	0	0	0
Charlotte	7.00494213911088	28.788068111505364	6.7905032020344755	35.166595	-80.87675	AAA Carolinas	NC	5130 South Blvd Starmount Charlotte, NC 28217	3.2188758248682006	1.0986122886681098	0.0	0	2	0	1	0	0	0.0	0.0	0.0	0.0	0.0	0.0	0.0	0.0	0.0	0.0	0.0	0.0	0.0	0.0	0.0	0.0	0.0	0.0	0.0	0.0	0.0	0.0	0.0	0.0	0.0	0.0	0.0	0	0	0	0	0
Las Vegas	15.015016906513997	12.61762424225997	10.057409325786136	36.100578999999996	-115.28086499999999	Tuesday Morning	NV	8650 W Tropicana Ave Ste 110 Spring Valley Las Vegas, NV 89147	3.4965075614664802	0.6931471805599453	0.0	0	2	0	1	0	0	0.0	0.0	0.0	0.0	0.0	0.0	0.0	0.0	1.0	0.0	0.0	0.0	0.0	0.0	0.0	0.0	0.0	0.0	0.0	0.0	0.0	0.0	0.0	0.0	0.0	0.0	0.0	0	0	0	0	0
Las Vegas	16.356797681328832	10.317077889817277	9.890171186478183	36.0490252	-115.24435509999999	Best Storage	NV	6960 W Robindale Rd Southwest Las Vegas, NV 89113	2.995732273553991	1.6094379124341003	0.0	0	2	0	1	0	0	0.0	0.0	0.0	0.0	0.0	0.0	0.0	0.0	1.0	0.0	0.0	0.0	0.0	0.0	0.0	0.0	0.0	0.0	0.0	0.0	0.0	0.0	0.0	0.0	0.0	0.0	0.0	0	0	0	0	0
Pittsburgh	6.648535990646052	14.638471968647846	40.54636607323264	40.3830261	-80.0153449	Amels	PA	437 McNeilly Rd Pittsburgh, PA 15226	3.713572066704308	1.3862943611198906	0.0	2	1	0	1	1	0	0.0	1.0	0.0	1.0	1.0	1.0	1.0	1.0	1.0	1.0	0.0	0.0	0.0	0.0	1.0	0.0	0.0	0.0	1.0	0.0	0.0	0.0	0.0	0.0	0.0	0.0	0.0	1	0	0	0	0
Pittsburgh	1.078308139798804	19.377726675819403	41.685795254363086	40.432297999999996	-80.0030208	Steelhouse	PA	Station Square 7 E Carson St South Side Pittsburgh, PA 15219	2.833213344056216	0.0	0.0	2	1	0	1	1	0	0.0	0.0	0.0	0.0	0.0	0.0	0.0	0.0	1.0	0.0	1.0	0.0	0.0	0.0	0.0	0.0	0.0	0.0	0.0	0.0	0.0	0.0	0.0	0.0	0.0	0.0	0.0	0	0	0	1	0
Pittsburgh	5.683061274557172	24.81517133554816	37.674145571531255	40.4510796	-79.93452090000001	Shadyside Variety Store	PA	5421 Walnut St Shadyside Pittsburgh, PA 15232	2.8903717578961645	0.6931471805599453	0.0	0	2	0	1	1	0	0.0	0.0	0.0	0.0	0.0	0.0	0.0	0.0	1.0	0.0	0.0	0.0	0.0	0.0	0.0	0.0	1.0	0.0	0.0	0.0	0.0	0.0	0.0	0.0	0.0	0.0	0.0	0	0	0	0	0
Las Vegas	8.894998313495739	2.8707430874914412	2.4672683662305475	36.092909999999996	-115.173029	Franklin	NV	Delano Las Vegas 3940 Las Vegas Blvd The Strip Las Vegas, NV 89119	3.5553480614894135	0.6931471805599453	0.0	0	1	0	1	2	0	0.0	0.0	0.0	1.0	1.0	0.0	0.0	0.0	1.0	0.0	0.0	0.0	0.0	0.0	0.0	1.0	0.0	0.0	0.0	0.0	0.0	0.0	0.0	0.0	0.0	0.0	0.0	0	0	0	1	0
Phoenix	2.7892339260972427	8.79063374095823	5.099397744610048	33.441790000000005	-112.102071	RWC Building Products	AZ	1918 W Grant St Phoenix, AZ 85009	0.0	1.0986122886681098	0.0	0	2	0	1	0	0	0.0	0.0	0.0	0.0	0.0	0.0	0.0	0.0	1.0	0.0	0.0	0.0	0.0	0.0	0.0	0.0	0.0	0.0	0.0	0.0	0.0	0.0	0.0	0.0	0.0	0.0	0.0	0	0	0	0	0
Las Vegas	19.27039860163499	25.706177424960288	21.9543631825679	36.287715999999996	-115.28981200000001	Fast Friendly Spotless	NV	6955 N Durango Drive Ste 1115-119 Centennial Las Vegas, NV 89149	0.0	0.0	0.0	0	2	0	1	0	0	0.0	0.0	0.0	0.0	0.0	0.0	0.0	0.0	0.0	0.0	0.0	0.0	0.0	0.0	0.0	0.0	0.0	0.0	0.0	0.0	0.0	0.0	0.0	0.0	0.0	0.0	0.0	0	0	0	0	0
Las Vegas	6.454934597332823	4.503402808407196	0.6570082279043679	36.1190372	-115.176005	Montblanc	NV	3500 Las Vegas Boulevard South Ste# L-1 The Strip Las Vegas, NV 89109	3.258096538021482	0.6931471805599453	0.0	0	2	0	1	3	0	0.0	0.0	0.0	0.0	0.0	0.0	0.0	0.0	1.0	0.0	0.0	0.0	0.0	0.0	0.0	0.0	0.0	0.0	0.0	0.0	0.0	0.0	0.0	0.0	0.0	0.0	0.0	0	0	0	0	0
Charlotte	2.3414264662619977	25.034357403395855	1.5024857885330587	35.2135399	-80.8177157	8th Street Studio	NC	1940 E 8th St Elizabeth Charlotte, NC 28204	0.0	0.0	0.0	0	2	0	1	0	0	0.0	0.0	0.0	0.0	0.0	0.0	0.0	0.0	0.0	0.0	0.0	0.0	0.0	0.0	0.0	0.0	0.0	0.0	0.0	0.0	0.0	0.0	0.0	0.0	0.0	0.0	0.0	0	0	0	0	0
Phoenix	14.35770110419305	10.190564117212594	16.11925351857681	33.3480616	-111.98202140000002	Safe Nails	AZ	4747 E Elliot Road Suite 16 Phoenix, AZ 85044	1.6094379124341003	0.6931471805599453	0.0	0	2	0	1	1	0	0.0	0.0	0.0	0.0	0.0	0.0	0.0	0.0	1.0	0.0	0.0	0.0	0.0	0.0	0.0	0.0	0.0	0.0	0.0	0.0	0.0	0.0	0.0	0.0	0.0	0.0	0.0	0	0	0	0	0
Phoenix	0.2670819905449575	6.306646469258887	3.0383264033852257	33.4493297	-112.0739934	Detroit Coney Grill	AZ	16 W Adams St Phoenix, AZ 85003	4.31748811353631	1.9459101490553132	0.0	0	2	0	1	0	0	0.0	1.0	0.0	1.0	0.0	1.0	0.0	1.0	1.0	0.0	0.0	0.0	0.0	0.0	1.0	0.0	0.0	0.0	0.0	0.0	0.0	0.0	0.0	0.0	0.0	0.0	0.0	1	0	0	0	0
Pittsburgh	0.26320563530607294	20.09089700549225	42.03837932808454	40.4400655	-80.00251440000001	La Gondola Pizzeria & Restaurant	PA	4 Market Sq Downtown Pittsburgh, PA 15222	3.091042453358316	1.6094379124341003	0.0	0	2	0	1	0	0	1.0	1.0	0.0	1.0	0.0	0.0	0.0	1.0	1.0	0.0	0.0	0.0	0.0	0.0	1.0	0.0	0.0	0.0	0.0	0.0	0.0	0.0	0.0	0.0	0.0	0.0	0.0	1	0	0	0	0
Pittsburgh	2.356395478756441	20.646343251030125	39.621434824896525	40.4303393	-79.9770267	Popeyes Kitchen Louisiana	PA	2010 Wharton St South Side Pittsburgh, PA 15203	3.1354942159291497	1.791759469228055	0.0	0	2	0	1	0	0	0.0	0.0	0.0	1.0	0.0	0.0	0.0	1.0	1.0	0.0	0.0	0.0	0.0	0.0	1.0	0.0	0.0	0.0	0.0	0.0	0.0	0.0	0.0	0.0	0.0	0.0	0.0	1	0	1	0	0
Pittsburgh	2.035498058603028	22.34350876566164	41.2729229949014	40.4537908	-79.9822515	Neighborhood Flea	PA	2301 Smallman Street Strip District Pittsburgh, PA 15222	2.0794415416798357	0.0	0.0	0	2	0	1	1	0	0.0	0.0	0.0	0.0	0.0	0.0	0.0	0.0	1.0	0.0	0.0	0.0	0.0	0.0	0.0	0.0	0.0	0.0	0.0	0.0	0.0	0.0	0.0	0.0	0.0	0.0	0.0	0	0	0	0	0
Charlotte	16.07732772370342	23.61172106383355	13.47198190118517	35.078856	-80.817685	Cvs Front Store	NC	6416 Rea Rd Charlotte, NC 28277	0.0	1.0986122886681098	0.0	0	2	0	1	0	0	0.0	0.0	0.0	0.0	0.0	0.0	0.0	0.0	0.0	0.0	0.0	0.0	0.0	0.0	0.0	0.0	0.0	0.0	0.0	0.0	0.0	0.0	0.0	0.0	0.0	0.0	0.0	0	0	0	0	0
Phoenix	7.4282372642453085	8.173182976170168	4.7576868310709655	33.5082687981416	-112.031715645508	Julia Baker Confections	AZ	Biltmore Fashion Park 2502 E Camelback, Ste 130 Phoenix, AZ 85016	4.859812404361672	2.8903717578961645	0.0	2	0	0	0	1	0	0.0	0.0	0.0	1.0	0.0	0.0	1.0	0.0	1.0	1.0	0.0	0.0	0.0	0.0	1.0	0.0	0.0	1.0	1.0	1.0	1.0	0.0	0.0	0.0	0.0	0.0	0.0	1	0	0	0	0
Edinburgh	0.9377891707579727	11.075175534944293	1.0723424071186365	55.94524770000001	-3.1835894000000002	The Southsider	EDH	3-7 W Richmond Street Newington Edinburgh EH8 9EF	2.772588722239781	0.0	0.0	0	1	0	1	1	1	0.0	0.0	0.0	1.0	1.0	0.0	0.0	0.0	1.0	0.0	0.0	0.0	0.0	0.0	0.0	0.0	0.0	0.0	0.0	0.0	0.0	0.0	0.0	0.0	0.0	0.0	0.0	0	0	0	1	0
Las Vegas	18.565749057934024	9.97969096342199	13.089024668607065	35.999813079834	-115.139602661133	J Cuts Style n Shave	NV	1050 E Cactus Ave Southeast Las Vegas, NV 89183	0.0	1.0986122886681098	0.0	0	2	0	1	2	0	0.0	0.0	0.0	0.0	0.0	0.0	0.0	0.0	0.0	0.0	0.0	0.0	0.0	0.0	0.0	0.0	0.0	0.0	0.0	0.0	0.0	0.0	0.0	0.0	0.0	0.0	0.0	0	0	0	0	0
Las Vegas	7.310387754686248	3.550882759089614	0.7435175583509427	36.1086896	-115.1731693	Starbucks	NV	3720 S Las Vegas Blvd Crystals Mall at City Center The Strip Las Vegas, NV 89109	4.2626798770413155	1.791759469228055	0.0	0	2	0	0	1	0	0.0	0.0	0.0	0.0	0.0	0.0	0.0	0.0	1.0	0.0	0.0	0.0	0.0	0.0	0.0	0.0	0.0	0.0	0.0	0.0	0.0	0.0	0.0	0.0	0.0	0.0	0.0	0	0	0	0	0
Las Vegas	10.456086469745255	5.56571785257363	4.007246239401352	36.090461730956996	-115.20318603515601	Nellis Cab Company	NV	5490 Cameron St Las Vegas, NV 89118	1.9459101490553132	1.0986122886681098	0.0	0	2	0	1	0	0	0.0	0.0	0.0	0.0	0.0	0.0	0.0	0.0	0.0	0.0	0.0	0.0	0.0	0.0	0.0	0.0	0.0	0.0	0.0	0.0	0.0	0.0	0.0	0.0	0.0	0.0	0.0	0	0	0	0	0
Madison	3.50672339973846	5.9115445297697775	4.259764553567381	43.0911969	-89.3558197	Designs By the Bay	WI	1941 Winnebago St Schenk - Atwood Madison, WI 53704	0.0	0.0	0.0	0	2	0	1	2	0	0.0	0.0	0.0	0.0	0.0	0.0	0.0	0.0	1.0	0.0	0.0	0.0	0.0	0.0	0.0	0.0	0.0	0.0	0.0	0.0	0.0	0.0	0.0	0.0	0.0	0.0	0.0	0	0	0	0	0
Las Vegas	17.32902997762463	24.087990711237204	20.400398683770483	36.2816059150475	-115.26666404752399	Painted Desert Dental	NV	6525 North Buffalo Drive Ste 180 Centennial Las Vegas, NV 89131	0.0	0.0	0.0	0	2	0	1	0	0	0.0	0.0	0.0	0.0	0.0	0.0	0.0	0.0	0.0	0.0	0.0	0.0	0.0	0.0	0.0	0.0	0.0	0.0	0.0	0.0	0.0	0.0	0.0	0.0	0.0	0.0	0.0	0	0	0	0	0
Pittsburgh	2.29686340879483	20.268140702512756	39.74487023462678	40.4279833	-79.9802551	Wahl Robt Auto Repair	PA	1805 Sarah St South Side Pittsburgh, PA 15203	0.0	0.0	0.0	0	2	0	1	0	0	0.0	0.0	0.0	0.0	0.0	0.0	0.0	0.0	0.0	0.0	0.0	0.0	0.0	0.0	0.0	0.0	0.0	0.0	0.0	0.0	0.0	0.0	0.0	0.0	0.0	0.0	0.0	0	0	0	0	0
Madison	1.6045886641870963	7.227230076313647	2.3384642788345342	43.0837231	-89.3771	Mad City Locksmith	WI	825 E Johnson Tenney - Lapham Madison, WI 53703	0.0	0.0	0.0	0	2	0	1	0	0	0.0	0.0	0.0	0.0	0.0	0.0	0.0	0.0	1.0	0.0	0.0	0.0	0.0	0.0	0.0	0.0	0.0	0.0	0.0	0.0	0.0	0.0	0.0	0.0	0.0	0.0	0.0	0	0	0	0	0
Las Vegas	11.983859219772425	8.916276569361976	6.445192788776874	36.099708299999996	-115.2396368	Jackify	NV	4340 S Valley View Ste 230 Spring Valley Las Vegas, NV 89103	0.0	0.0	0.0	0	2	0	1	0	0	0.0	0.0	0.0	0.0	0.0	0.0	0.0	0.0	1.0	0.0	0.0	0.0	0.0	0.0	0.0	0.0	0.0	0.0	0.0	0.0	0.0	0.0	0.0	0.0	0.0	0.0	0.0	0	0	0	0	0
Phoenix	16.457265393371838	13.035727687256038	18.500687252492092	33.3206301	-111.9915878	Papa John's Pizza	AZ	4302 E Ray Rd Ste 113 Phoenix, AZ 85044	2.70805020110221	0.0	0.0	0	2	0	1	1	0	1.0	0.0	0.0	0.0	0.0	1.0	0.0	1.0	1.0	0.0	0.0	0.0	0.0	0.0	1.0	0.0	0.0	0.0	0.0	0.0	0.0	0.0	0.0	0.0	0.0	0.0	0.0	1	0	0	0	1
Las Vegas	12.580724032399738	18.573180501424087	14.818051397656797	36.231877000000004	-115.25040600000001	Desert Storage	NV	3900 North Tenaya Way Northwest Las Vegas, NV 89129	0.0	0.0	0.0	0	2	0	1	0	0	0.0	0.0	0.0	0.0	0.0	0.0	0.0	0.0	1.0	0.0	0.0	0.0	0.0	0.0	0.0	0.0	0.0	0.0	0.0	0.0	0.0	0.0	0.0	0.0	0.0	0.0	0.0	0	0	0	0	0
Las Vegas	5.360576626131488	7.568754176789647	3.806032630285257	36.145891799999994	-115.1891244	Leonard Benson Company	NV	3540 W Sahara Ave Ste 441 Westside Las Vegas, NV 89102	0.0	0.0	0.0	0	2	0	1	0	0	0.0	0.0	0.0	0.0	0.0	0.0	0.0	0.0	0.0	0.0	0.0	0.0	0.0	0.0	0.0	0.0	0.0	0.0	0.0	0.0	0.0	0.0	0.0	0.0	0.0	0.0	0.0	0	0	0	0	0
Phoenix	8.632408666107168	8.072733433154752	6.152679873861274	33.5100322	-112.0130117	Great Clips	AZ	32nd Street & Camelback Phoenix, AZ 85003	1.3862943611198906	0.0	0.0	0	2	0	1	0	0	0.0	0.0	0.0	0.0	0.0	0.0	0.0	1.0	1.0	0.0	0.0	0.0	0.0	0.0	0.0	0.0	0.0	0.0	0.0	0.0	0.0	0.0	0.0	0.0	0.0	0.0	0.0	0	0	0	0	0
Charlotte	8.367690235717706	24.56193355375121	6.107248515610529	35.1473609	-80.83304100000001	Swoozie's	NC	4722 Sharon Rd Ste G South Park Charlotte, NC 28210	2.833213344056216	0.6931471805599453	0.0	0	2	0	1	1	0	0.0	0.0	0.0	0.0	0.0	0.0	0.0	0.0	1.0	0.0	0.0	0.0	0.0	0.0	0.0	0.0	0.0	0.0	0.0	0.0	0.0	0.0	0.0	0.0	0.0	0.0	0.0	0	0	0	0	0
Las Vegas	17.628871276633358	12.864760582947282	11.583120413235807	36.059011551535896	-115.279101803899	Starbucks	NV	7050 Durango Dr Spring Valley Las Vegas, NV 89113	5.0689042022202315	1.9459101490553132	0.0	0	2	0	0	0	0	0.0	1.0	0.0	0.0	0.0	0.0	0.0	0.0	1.0	0.0	0.0	0.0	0.0	0.0	0.0	0.0	0.0	0.0	0.0	0.0	0.0	0.0	0.0	0.0	0.0	0.0	0.0	0	0	0	0	0
Las Vegas	17.91532500620463	16.90711468512447	13.965803714949162	36.119068799999994	-115.3256457	RC Willey	NV	3850 South Town Center Dr South Summerlin Las Vegas, NV 89135	5.771441123130016	3.091042453358316	0.6931471805599453	0	2	0	1	1	0	0.0	0.0	0.0	0.0	0.0	0.0	0.0	0.0	1.0	0.0	0.0	0.0	0.0	0.0	0.0	0.0	0.0	0.0	1.0	0.0	0.0	0.0	0.0	0.0	0.0	0.0	0.0	0	0	0	0	0
Pittsburgh	1.5732010622054506	19.13869649472424	43.129351399852446	40.438047	-80.01828	Bella Vista	PA	1204 Grandview Ave Duquesne Heights Pittsburgh, PA 15211	3.295836866004329	1.0986122886681098	0.0	2	1	1	1	2	0	0.0	0.0	0.0	1.0	0.0	0.0	1.0	0.0	1.0	1.0	0.0	0.0	0.0	0.0	0.0	0.0	0.0	0.0	0.0	0.0	0.0	0.0	0.0	0.0	0.0	0.0	0.0	1	0	0	0	0
Phoenix	4.524653598231469	3.950466594249136	3.3856096060166077	33.467805	-112.02978300000001	Tortas el Rey	AZ	1811 N 24th St Phoenix, AZ 85008	4.30406509320417	1.9459101490553132	0.0	0	2	0	1	0	0	0.0	0.0	0.0	1.0	1.0	0.0	1.0	1.0	1.0	0.0	0.0	0.0	0.0	0.0	1.0	0.0	0.0	0.0	1.0	0.0	0.0	0.0	0.0	0.0	0.0	0.0	0.0	1	0	0	0	0
Phoenix	4.684100160515593	4.292963973805877	3.297493864829906	33.471323	-112.02988300000001	Wren House Brewing	AZ	2125 N 24th St Phoenix, AZ 85008	5.236441962829949	2.3978952727983707	0.0	0	2	0	1	0	0	0.0	0.0	0.0	0.0	0.0	0.0	0.0	0.0	1.0	0.0	0.0	0.0	0.0	0.0	0.0	0.0	0.0	0.0	1.0	0.0	0.0	0.0	0.0	0.0	0.0	0.0	0.0	0	0	0	0	0
Las Vegas	14.08390153306761	7.998762574178964	7.563177951698596	36.062036299999995	-115.223372	Port of Subs	NV	6080 Badura Ave Spring Valley Las Vegas, NV 89118	5.153291594497779	2.833213344056216	0.0	2	2	0	0	0	0	0.0	0.0	0.0	1.0	1.0	1.0	0.0	1.0	1.0	0.0	0.0	0.0	0.0	0.0	1.0	0.0	0.0	0.0	1.0	0.0	0.0	0.0	0.0	0.0	0.0	0.0	0.0	1	1	0	0	0
Las Vegas	17.82843672401594	13.971120485556083	12.186112299149599	36.071641	-115.29489299999999	Furniture In Paradise	NV	Spring Valley Las Vegas, NV 89148	1.6094379124341003	0.0	0.0	0	2	0	1	1	0	0.0	0.0	0.0	0.0	0.0	0.0	0.0	0.0	1.0	0.0	0.0	0.0	0.0	0.0	0.0	0.0	0.0	0.0	1.0	0.0	0.0	0.0	0.0	0.0	0.0	0.0	0.0	0	0	0	0	0
Las Vegas	17.90047957689859	14.968283985857513	12.74350601087688	36.0860429	-115.30752749999999	Chilly Willie's	NV	5651 S Grand Canyon Dr Ste 140 Spring Valley Las Vegas, NV 89148	3.912023005428146	1.6094379124341003	0.0	0	2	0	0	0	0	0.0	0.0	0.0	0.0	0.0	0.0	0.0	0.0	1.0	0.0	0.0	0.0	0.0	0.0	0.0	0.0	0.0	0.0	1.0	0.0	0.0	0.0	0.0	0.0	0.0	0.0	0.0	0	0	0	0	0
Las Vegas	14.016403133444832	16.506246284211596	12.758983593907663	36.1757303	-115.29102890000001	Hertz Rent A Car	NV	221 North Rampart Boulevard Westside Las Vegas, NV 89145	2.0794415416798357	0.0	0.0	0	2	0	1	0	0	0.0	0.0	0.0	0.0	0.0	0.0	0.0	0.0	0.0	0.0	0.0	0.0	0.0	0.0	0.0	0.0	0.0	0.0	0.0	0.0	0.0	0.0	0.0	0.0	0.0	0.0	0.0	0	0	0	0	0
Las Vegas	15.472623144625894	9.806444957989836	9.072065387485885	36.0583459	-115.24315700000001	Hair It Is @ Studio Salons	NV	7155 S Rainbow Blvd Ste 216 Southwest Las Vegas, NV 89118	2.833213344056216	0.6931471805599453	0.0	0	2	0	1	1	0	0.0	0.0	0.0	0.0	0.0	0.0	0.0	1.0	1.0	0.0	0.0	0.0	0.0	0.0	0.0	0.0	0.0	0.0	1.0	0.0	0.0	0.0	0.0	0.0	0.0	0.0	0.0	0	0	0	0	0
Pittsburgh	6.891705186038165	24.784119732770115	35.79498564656929	40.4378464	-79.9193365	Fanattics	PA	1704 Shady Ave Squirrel Hill Pittsburgh, PA 15217	3.58351893845611	1.3862943611198906	0.0	2	1	0	1	0	2	0.0	1.0	0.0	1.0	1.0	0.0	0.0	0.0	1.0	0.0	1.0	0.0	0.0	0.0	1.0	0.0	1.0	0.0	0.0	0.0	0.0	0.0	0.0	0.0	0.0	1.0	0.0	1	0	0	1	0
Phoenix	0.7082046831478613	6.608675968895462	2.1346356666107864	33.4580837	-112.0743321	KMLE Country 107.9	AZ	840 N Central Ave Phoenix, AZ 85004	1.9459101490553132	0.6931471805599453	0.0	0	2	0	1	0	0	0.0	0.0	0.0	0.0	0.0	0.0	0.0	0.0	0.0	0.0	0.0	0.0	0.0	0.0	0.0	0.0	0.0	0.0	0.0	0.0	0.0	0.0	0.0	0.0	0.0	0.0	0.0	0	0	0	0	0
Phoenix	4.138099698418363	8.958332257244422	2.148448685982053	33.4884218	-112.0823702	Peter Piper Pizza	AZ	3403 N 7th Ave Phoenix, AZ 85013	4.060443010546419	2.0794415416798357	0.0	1	0	0	0	0	0	0.0	0.0	0.0	1.0	1.0	0.0	0.0	1.0	1.0	1.0	0.0	0.0	0.0	0.0	1.0	0.0	0.0	0.0	0.0	0.0	0.0	0.0	0.0	0.0	0.0	0.0	0.0	1	0	0	0	1
Las Vegas	10.60038891938581	15.165446741081748	11.328792422798482	36.195513	-115.248106	Instyle Nails	NV	7175 W Lake Mead Blvd Las Vegas, NV 89128	4.060443010546419	2.3978952727983707	0.6931471805599453	0	2	0	1	1	0	0.0	0.0	0.0	0.0	0.0	0.0	0.0	0.0	1.0	0.0	0.0	0.0	0.0	0.0	0.0	0.0	0.0	0.0	0.0	1.0	0.0	0.0	0.0	0.0	0.0	0.0	0.0	0	0	0	0	0
Edinburgh	3.125725005236508	11.534353932281254	3.8369264091122344	55.980656272544	-3.1774117773122996	Vue Cinema	EDH	Ocean Drive Ocean Terminal Leith Edinburgh EH6 6	3.713572066704308	1.3862943611198906	0.6931471805599453	0	2	0	1	0	0	0.0	0.0	0.0	0.0	0.0	0.0	0.0	1.0	0.0	0.0	0.0	0.0	0.0	0.0	0.0	0.0	0.0	0.0	0.0	0.0	0.0	0.0	0.0	0.0	0.0	0.0	0.0	0	0	0	0	0
Phoenix	3.978093601798463	2.970806215756381	5.43639389703605	33.431782	-112.038921	Enterprise Rent-A-Car	AZ	Phoenix Sky Harbor International Airport 1628 E Sky Harbor Cir S Phoenix, AZ 85034	5.43372200355424	2.70805020110221	0.0	0	2	0	1	0	0	0.0	0.0	0.0	0.0	0.0	0.0	0.0	0.0	0.0	0.0	0.0	0.0	0.0	0.0	0.0	0.0	0.0	0.0	0.0	0.0	0.0	0.0	0.0	0.0	0.0	0.0	0.0	0	0	0	0	0
Las Vegas	3.260776112054017	6.14521194137119	3.3834986883432014	36.1435899138451	-115.15734024345899	Rock in Rio USA 2015	NV	Sahara and Las Vegas Blvd The Strip Las Vegas, NV 89104	5.170483995038151	1.791759469228055	0.0	0	2	0	1	0	0	0.0	0.0	0.0	0.0	0.0	0.0	0.0	0.0	0.0	0.0	0.0	0.0	0.0	0.0	0.0	0.0	0.0	0.0	0.0	0.0	0.0	0.0	0.0	0.0	0.0	0.0	0.0	0	0	0	0	0
Phoenix	25.867907120049296	28.957330581007213	23.402855045037118	33.6823994489832	-112.115377990352	U-Haul Moving & Storage at I-17 & Deer Valley	AZ	21621 N 26th Ave Phoenix, AZ 85027	2.4849066497880004	0.0	0.0	0	2	0	1	0	0	0.0	0.0	0.0	0.0	0.0	0.0	0.0	0.0	1.0	0.0	0.0	0.0	0.0	0.0	0.0	0.0	0.0	0.0	0.0	0.0	0.0	0.0	0.0	0.0	0.0	0.0	0.0	0	0	0	0	0
Las Vegas	6.813734867586063	8.531407569651316	4.683255588380025	36.1455896	-115.2065227	Habib's Mediterranean Market	NV	4750 W Sahara Ave Westside Las Vegas, NV 89102	0.0	1.0986122886681098	0.0	0	2	0	1	0	0	0.0	0.0	0.0	0.0	0.0	0.0	0.0	0.0	0.0	0.0	0.0	0.0	0.0	0.0	0.0	0.0	0.0	0.0	0.0	0.0	0.0	0.0	0.0	0.0	0.0	0.0	0.0	0	0	0	0	0
Las Vegas	10.532317000330007	9.925151567729984	6.52973723288641	36.1269391	-115.2416392	K Jun Chicken	NV	6850 Spring Mountain Rd Chinatown Las Vegas, NV 89102	2.3978952727983707	2.302585092994046	0.0	0	0	0	1	0	0	0.0	0.0	0.0	1.0	1.0	0.0	0.0	1.0	1.0	0.0	0.0	0.0	0.0	0.0	1.0	0.0	0.0	0.0	0.0	0.0	0.0	0.0	0.0	0.0	0.0	0.0	0.0	1	0	0	0	0
Las Vegas	12.854099122787376	13.533855216165666	10.009891383623742	36.1445189	-115.2757054	CASH 1 Loans	NV	8450 W Sahara Ave Ste 114 Westside Las Vegas, NV 89117	0.0	0.6931471805599453	0.0	0	2	0	1	0	0	0.0	0.0	0.0	0.0	0.0	0.0	0.0	0.0	0.0	0.0	0.0	0.0	0.0	0.0	0.0	0.0	0.0	0.0	0.0	0.0	0.0	0.0	0.0	0.0	0.0	0.0	0.0	0	0	0	0	0
Las Vegas	5.360576626131488	7.568754176789647	3.806032630285257	36.145891799999994	-115.1891244	National Delivery Systems	NV	3540 W Sahara Ave Ste 440 Westside Las Vegas, NV 89102	0.0	0.0	0.0	0	2	0	1	0	0	0.0	0.0	0.0	0.0	0.0	0.0	0.0	0.0	1.0	0.0	0.0	0.0	0.0	0.0	0.0	0.0	0.0	0.0	0.0	0.0	0.0	0.0	0.0	0.0	0.0	0.0	0.0	0	0	0	0	0
Phoenix	0.45891150168846384	5.961113811664861	2.8841518157027144	33.45	-112.07	Bountiful Baskets Food Co-op	AZ	Phoenix, AZ 85073	2.9444389791664403	1.3862943611198906	0.0	0	2	0	1	0	0	0.0	0.0	0.0	0.0	0.0	0.0	0.0	0.0	1.0	0.0	0.0	0.0	0.0	0.0	0.0	0.0	0.0	0.0	1.0	0.0	0.0	0.0	0.0	0.0	0.0	0.0	0.0	0	0	0	0	0
Phoenix	47.33043667690234	50.16207431574439	44.849665238933326	33.873762799999994	-112.1497054	Gap	AZ	4250 W Honda Bow Rd Phoenix, AZ 85003	2.8903717578961645	0.6931471805599453	0.0	0	2	0	1	1	0	0.0	0.0	0.0	0.0	0.0	0.0	0.0	0.0	1.0	0.0	0.0	0.0	0.0	0.0	0.0	0.0	0.0	0.0	0.0	0.0	0.0	0.0	0.0	0.0	0.0	0.0	0.0	0	0	0	0	0
Las Vegas	10.523146150920708	17.293649273116188	13.697261878337924	36.2313494	-115.2216625	Gaylord Security	NV	5715 W Alexander Rd Ste 110 Northwest Las Vegas, NV 89130	0.0	0.6931471805599453	0.0	0	2	0	1	0	0	0.0	0.0	0.0	0.0	0.0	0.0	0.0	0.0	1.0	0.0	0.0	0.0	0.0	0.0	0.0	0.0	0.0	0.0	0.0	0.0	0.0	0.0	0.0	0.0	0.0	0.0	0.0	0	0	0	0	0
Phoenix	0.4565211465832705	6.15565522251731	3.164182604488114	33.447874033194104	-112.07268935150499	Potbelly Sandwich Shop	AZ	1 E Washington St Ste 170 Phoenix, AZ 85004	5.8805329864007	2.1972245773362196	0.0	0	2	0	0	0	0	1.0	1.0	0.0	1.0	0.0	1.0	0.0	1.0	1.0	0.0	0.0	0.0	0.0	0.0	1.0	0.0	0.0	0.0	0.0	1.0	0.0	0.0	0.0	0.0	0.0	0.0	0.0	1	1	0	0	0
Las Vegas	12.801027133737612	4.592576216078561	6.668328041081054	36.0549747	-115.16905690000002	Hot Topic Outlet	NV	Las Vegas Premium Outlets - South 7400 Las Vegas Blvd S Southeast Las Vegas, NV 89123	4.143134726391533	2.0794415416798357	0.0	0	2	0	1	1	0	0.0	0.0	0.0	0.0	0.0	0.0	0.0	0.0	1.0	0.0	0.0	0.0	0.0	0.0	0.0	0.0	0.0	0.0	1.0	0.0	0.0	0.0	0.0	0.0	0.0	0.0	0.0	0	0	0	0	0
Las Vegas	9.515773089023352	3.6248286724574377	7.017394987640382	36.0859499	-115.10141750000001	Hometown Classic American Eats	NV	5715 S Pecos Rd Southeast Las Vegas, NV 89120	4.795790545596741	2.1972245773362196	0.0	2	0	0	0	0	0	0.0	0.0	0.0	1.0	1.0	1.0	1.0	1.0	1.0	0.0	0.0	0.0	0.0	0.0	1.0	0.0	0.0	0.0	1.0	0.0	0.0	0.0	0.0	0.0	0.0	0.0	0.0	1	0	0	0	0
Phoenix	8.085054571886147	6.452125678154719	5.994942156419857	33.495514	-112.00498300000001	Saguaro Alignment & Brakes	AZ	3540 E Indian School Rd Phoenix, AZ 85018	0.0	0.0	0.0	0	2	0	1	0	0	0.0	0.0	0.0	0.0	0.0	0.0	0.0	0.0	0.0	0.0	0.0	0.0	0.0	0.0	0.0	0.0	0.0	0.0	0.0	0.0	0.0	0.0	0.0	0.0	0.0	0.0	0.0	0	0	0	0	0
Phoenix	3.2293448105809524	8.303632464010231	1.5629931370463939	33.480326	-112.08084699999999	ProStyles Barbershop	AZ	507-B W Thomas Rd Phoenix, AZ 85013	3.1354942159291497	1.3862943611198906	0.0	0	2	0	1	1	0	0.0	0.0	0.0	0.0	0.0	0.0	0.0	0.0	1.0	0.0	0.0	0.0	0.0	0.0	0.0	0.0	0.0	0.0	1.0	0.0	0.0	0.0	0.0	0.0	0.0	0.0	0.0	0	0	0	0	0
Charlotte	12.718500492067664	33.52359753541946	15.178815851994663	35.3366309	-80.827876	Harris Boulevard Veterinary Clinic	NC	5710 West WT Harris Boulevard Charlotte, NC 28269	0.0	1.0986122886681098	0.0	0	2	0	1	0	0	0.0	0.0	0.0	0.0	0.0	0.0	0.0	0.0	0.0	0.0	0.0	0.0	0.0	0.0	0.0	0.0	0.0	0.0	0.0	0.0	0.0	0.0	0.0	0.0	0.0	0.0	0.0	0	0	0	0	0
Madison	6.902122293915623	3.3225501002769593	7.571206903574223	43.115195899999996	-89.32817320000001	Prime Quarter Steak House	WI	3520 E Washington Ave Hawthorne Madison, WI 53704	3.8501476017100584	1.0986122886681098	0.0	0	1	0	1	1	0	0.0	0.0	0.0	1.0	0.0	0.0	1.0	0.0	1.0	1.0	0.0	0.0	0.0	0.0	0.0	1.0	0.0	0.0	1.0	0.0	0.0	0.0	0.0	0.0	0.0	0.0	1.0	1	0	0	0	0
Phoenix	13.141685582258418	18.36050328030824	11.589951981200997	33.551393	-112.15093200000001	Palm Glen Animal Hospital	AZ	7771 N 43rd Ave Phoenix, AZ 85051	3.258096538021482	1.0986122886681098	0.0	0	2	0	1	0	0	0.0	0.0	0.0	0.0	0.0	0.0	0.0	0.0	0.0	0.0	0.0	0.0	0.0	0.0	0.0	0.0	0.0	0.0	0.0	0.0	0.0	0.0	0.0	0.0	0.0	0.0	0.0	0	0	0	0	0
Edinburgh	2.3420267780207267	9.712206789977644	1.5309521187326065	55.9359811	-3.2096663	Project Coffee	EDH	196 Bruntsfield Place Bruntsfield Edinburgh EH10 4DF	4.955827057601261	2.5649493574615367	0.0	0	2	0	1	0	0	0.0	0.0	0.0	0.0	0.0	0.0	1.0	1.0	1.0	0.0	0.0	0.0	0.0	0.0	1.0	0.0	1.0	0.0	0.0	0.0	0.0	0.0	0.0	0.0	0.0	0.0	0.0	1	1	0	0	0
Pittsburgh	3.038142325869359	22.052767953271672	44.362077131903376	40.4670069382168	-80.0143267089844	Crazy Mocha Coffee	PA	2 E N Ave North Side Pittsburgh, PA 15212	3.5263605246161616	1.9459101490553132	0.0	0	2	0	0	0	0	0.0	0.0	0.0	0.0	0.0	0.0	0.0	0.0	1.0	0.0	0.0	0.0	0.0	0.0	0.0	0.0	1.0	0.0	0.0	0.0	0.0	0.0	0.0	0.0	0.0	0.0	0.0	0	0	0	0	0
Phoenix	8.307914214503857	3.2552816387744623	7.563328199320317	33.4602444330415	-111.98572162544	Phoenix Airport Marriott	AZ	1101 N 44th Street Phoenix, AZ 85008	5.726847747587197	2.5649493574615367	0.0	0	2	0	2	1	0	0.0	0.0	0.0	0.0	0.0	0.0	0.0	0.0	1.0	0.0	0.0	0.0	0.0	0.0	0.0	0.0	0.0	0.0	0.0	0.0	0.0	0.0	0.0	0.0	0.0	0.0	0.0	0	0	0	0	0
Phoenix	20.372547936695867	26.784615803674114	20.802443525777264	33.4942832	-112.28770300000001	Perfect Nails By Teresa	AZ	10540 W Indian School Rd Ste 5 Phoenix, AZ 85037	2.772588722239781	0.0	0.0	0	2	0	1	0	0	0.0	0.0	0.0	0.0	0.0	0.0	0.0	0.0	1.0	0.0	0.0	0.0	0.0	0.0	0.0	0.0	0.0	0.0	1.0	0.0	0.0	0.0	0.0	0.0	0.0	0.0	0.0	0	0	0	0	0
Phoenix	10.419507438575923	16.794077949576486	11.33942825855874	33.462094	-112.1858875	Waffle House	AZ	1237 N 59th Ave Phoenix, AZ 85043	5.231108616854587	2.9444389791664403	0.0	1	2	0	1	0	0	0.0	0.0	0.0	1.0	0.0	0.0	1.0	1.0	1.0	0.0	0.0	0.0	0.0	0.0	1.0	0.0	0.0	0.0	0.0	0.0	0.0	0.0	0.0	0.0	0.0	0.0	0.0	1	0	0	0	0
Pittsburgh	1.000937470544926	19.35269833145666	42.17920934975914	40.434824	-80.00787109999999	Carol's Confections	PA	125 W Station Square Dr The Freight House Shops At Station Square South Side Pittsburgh, PA 15219	1.9459101490553132	0.6931471805599453	0.0	0	2	0	1	0	0	0.0	0.0	0.0	0.0	0.0	0.0	0.0	0.0	1.0	0.0	0.0	0.0	0.0	0.0	0.0	0.0	0.0	0.0	0.0	1.0	0.0	0.0	0.0	0.0	0.0	0.0	0.0	0	0	0	0	0
Charlotte	13.105466476218718	15.706432468240957	9.657874621147768	35.141698	-80.73604499999999	ABC Bartending School	NC	1811 Sardis Rd N Ste 230 Charlotte, NC 28270	0.0	0.0	0.0	0	2	0	1	0	0	0.0	0.0	0.0	0.0	0.0	0.0	0.0	0.0	0.0	0.0	0.0	0.0	0.0	0.0	0.0	0.0	0.0	0.0	0.0	0.0	0.0	0.0	0.0	0.0	0.0	0.0	0.0	0	0	0	0	0
Charlotte	9.028559628062242	26.57771307316418	10.097389306380265	35.286823	-80.780227	Affordable Computer Repair By DJ	NC	6110 Carriage Oaks Dr Derita Charlotte, NC 28262	0.0	0.0	0.0	0	2	0	1	0	0	0.0	0.0	0.0	0.0	0.0	0.0	0.0	0.0	0.0	0.0	0.0	0.0	0.0	0.0	0.0	0.0	0.0	0.0	0.0	0.0	0.0	0.0	0.0	0.0	0.0	0.0	0.0	0	0	0	0	0
Las Vegas	17.992287528490372	13.143145660514296	11.923331149849673	36.0561226	-115.2812973	Shella Nails And Spa	NV	8680 W Warm Springs Rd Southwest Las Vegas, NV 89148	2.1972245773362196	0.6931471805599453	0.0	0	2	0	1	1	0	0.0	0.0	0.0	0.0	0.0	0.0	0.0	1.0	1.0	0.0	0.0	0.0	0.0	0.0	0.0	0.0	0.0	0.0	1.0	0.0	0.0	0.0	0.0	0.0	0.0	0.0	0.0	0	0	0	0	0
Las Vegas	8.37786623657778	3.240499015970157	1.8466385641441305	36.098909	-115.17555700000001	Regale Ristorante Italiano	NV	3850 Las Vegas Blvd S The Strip Las Vegas, NV 89119	0.0	0.0	0.0	0	2	1	1	1	0	0.0	0.0	0.0	0.0	0.0	0.0	1.0	0.0	1.0	0.0	0.0	0.0	0.0	0.0	0.0	0.0	0.0	0.0	0.0	0.0	0.0	0.0	0.0	0.0	0.0	0.0	0.0	1	0	0	0	0
Las Vegas	9.902667589022917	11.596851138992529	7.832535174397066	36.152703	-115.244211	A Happy Dog Wash	NV	1725 S Rainbow Blvd Ste 12 Westside Las Vegas, NV 89146	3.367295829986474	0.6931471805599453	0.0	0	2	0	1	0	0	0.0	0.0	0.0	0.0	0.0	0.0	0.0	0.0	0.0	0.0	0.0	0.0	0.0	0.0	0.0	0.0	0.0	0.0	0.0	0.0	0.0	0.0	0.0	0.0	0.0	0.0	0.0	0	0	0	0	0
Las Vegas	7.886940978352435	3.1226646005334486	1.3964743565763351	36.102545899999996	-115.172271	Tix4Tonight - Showcase Mall	NV	3791 Las Vegas Blvd S The Strip Las Vegas, NV 89109	2.5649493574615367	0.6931471805599453	0.0	0	2	0	1	0	0	0.0	0.0	0.0	0.0	0.0	0.0	0.0	0.0	0.0	0.0	0.0	0.0	0.0	0.0	0.0	0.0	0.0	0.0	0.0	0.0	0.0	0.0	0.0	0.0	0.0	0.0	0.0	0	0	0	0	0
Edinburgh	6.143957244307324	11.882907649809873	5.547559183614013	55.898778099999994	-3.2039694	Pentland Hills Regional Park	EDH	Biggar Road Edinburgh EH10 7DX	2.772588722239781	0.6931471805599453	0.6931471805599453	0	2	0	1	0	0	0.0	0.0	0.0	0.0	0.0	0.0	0.0	1.0	0.0	0.0	0.0	0.0	0.0	0.0	0.0	0.0	0.0	0.0	0.0	0.0	0.0	0.0	0.0	0.0	0.0	0.0	0.0	0	0	0	0	0
Charlotte	7.5945051226023335	23.87353033127357	5.051058279856702	35.155442	-80.824249	Scout & Molly's	NC	3920 Sharon Rd Ste B150 South Park Charlotte, NC 28211	3.2188758248682006	1.0986122886681098	0.0	0	2	0	1	2	0	0.0	0.0	0.0	0.0	0.0	0.0	0.0	0.0	1.0	0.0	0.0	0.0	0.0	0.0	0.0	0.0	0.0	0.0	1.0	0.0	0.0	0.0	0.0	0.0	0.0	0.0	0.0	0	0	0	0	0
Las Vegas	8.545099311417328	6.42876300364626	3.1510488408532478	36.115074	-115.2056	Flamingo Massage	NV	4755 W Flamingo Rd Las Vegas, NV 89103	2.8903717578961645	2.3978952727983707	0.0	0	2	0	1	2	0	0.0	0.0	0.0	0.0	0.0	0.0	0.0	0.0	0.0	0.0	0.0	0.0	0.0	0.0	0.0	0.0	0.0	0.0	0.0	0.0	0.0	0.0	0.0	0.0	0.0	0.0	0.0	0	0	0	0	0
Las Vegas	13.932935680313342	9.195852292523531	7.761291986015939	36.075968700000004	-115.2420709	Holiday Inn Express & Suites Las Vegas I-215 S. Beltway	NV	6220 S Rainbow Blvd Spring Valley Las Vegas, NV 89118	3.9512437185814275	0.6931471805599453	0.0	0	2	0	0	1	0	0.0	0.0	0.0	0.0	0.0	0.0	0.0	0.0	1.0	0.0	0.0	0.0	0.0	0.0	0.0	0.0	0.0	0.0	0.0	0.0	0.0	0.0	0.0	0.0	0.0	0.0	0.0	0	0	0	0	0
Phoenix	8.804828992539191	15.211068924559665	9.579841348616505	33.4667576	-112.16749080000001	Domino's Pizza	AZ	5030 W McDowell Rd Spc 51 Phoenix, AZ 85035	1.9459101490553132	0.0	0.0	0	2	0	1	0	0	1.0	0.0	0.0	0.0	0.0	0.0	0.0	0.0	0.0	0.0	0.0	0.0	0.0	0.0	0.0	0.0	0.0	0.0	0.0	0.0	0.0	0.0	0.0	0.0	0.0	0.0	0.0	1	1	0	0	1
Edinburgh	1.539383940907711	11.358704700414203	1.517048342770971	55.9401001	-3.1806627	Esha's	EDH	46 S Clerk St Newington Edinburgh EH8 9PS	0.0	0.0	0.0	0	2	0	1	0	0	0.0	0.0	0.0	0.0	0.0	0.0	0.0	0.0	0.0	0.0	0.0	0.0	0.0	0.0	0.0	0.0	0.0	0.0	0.0	0.0	0.0	0.0	0.0	0.0	0.0	0.0	0.0	1	0	0	0	0
Las Vegas	5.339594281998091	5.071835445811308	1.4990659755750406	36.128561	-115.17112979999999	Abra-ca-sexy! Scarlett	NV	Riviera Casino 2901 Las Vegas Blvd S The Strip Las Vegas, NV 89109	0.0	0.0	0.0	0	2	0	1	0	0	0.0	0.0	0.0	1.0	0.0	0.0	0.0	0.0	0.0	0.0	0.0	0.0	0.0	0.0	0.0	0.0	0.0	0.0	0.0	0.0	0.0	0.0	0.0	0.0	0.0	0.0	0.0	0	0	0	1	0
Las Vegas	17.62017407949172	14.605602252755206	12.408297490711295	36.085445	-115.303476	Chapel Hill Apartments	NV	9620 W Russell Rd Spring Valley Las Vegas, NV 89148	3.091042453358316	0.6931471805599453	0.0	0	2	0	1	0	0	0.0	0.0	0.0	0.0	0.0	0.0	0.0	0.0	1.0	0.0	0.0	0.0	0.0	0.0	0.0	0.0	0.0	0.0	0.0	0.0	0.0	0.0	0.0	0.0	0.0	0.0	0.0	0	0	0	0	0
Phoenix	9.265138640226027	3.1541614530222217	9.001530246905249	33.445399	-111.97513459999999	Astara Skin Care	AZ	5017 E Washington Unit 105 Phoenix, AZ 85034	0.0	0.0	0.0	0	2	0	1	2	0	0.0	0.0	0.0	0.0	0.0	0.0	0.0	0.0	1.0	0.0	0.0	0.0	0.0	0.0	0.0	0.0	0.0	0.0	0.0	0.0	0.0	0.0	0.0	0.0	0.0	0.0	0.0	0	0	0	0	0
Edinburgh	0.6699537300900388	10.51276868805433	0.48952151282487044	55.947621700000006	-3.1920547999999997	Dropkick Murphys	EDH	7 Merchant Street Old Town Edinburgh EH1 2QD	2.302585092994046	0.6931471805599453	0.0	0	1	0	1	1	1	0.0	0.0	0.0	1.0	1.0	0.0	0.0	0.0	1.0	0.0	0.0	1.0	0.0	0.0	0.0	1.0	0.0	0.0	0.0	0.0	0.0	1.0	0.0	0.0	1.0	0.0	0.0	0	0	0	1	0
Phoenix	11.40728260838956	13.540725664865434	8.650244088498894	33.5531152	-112.0540759	Northern Smiles Dentistry & Orthodontics	AZ	1313 E Northern Ave Phoenix, AZ 85020	3.091042453358316	0.6931471805599453	0.0	0	2	0	1	0	0	0.0	0.0	0.0	0.0	0.0	0.0	0.0	0.0	0.0	0.0	0.0	0.0	0.0	0.0	0.0	0.0	0.0	0.0	0.0	0.0	0.0	0.0	0.0	0.0	0.0	0.0	0.0	0	0	0	0	0
Las Vegas	15.053217866261722	15.62660817640749	12.194659268122487	36.1455404	-115.30075910000001	Avery's Coffee Roasters	NV	9440 W Sahara Ave Ste 145 Westside Las Vegas, NV 89117	5.676753802268282	3.367295829986474	0.0	0	2	0	0	0	0	0.0	1.0	0.0	0.0	0.0	0.0	0.0	0.0	1.0	0.0	0.0	0.0	0.0	0.0	0.0	0.0	1.0	0.0	1.0	0.0	0.0	0.0	0.0	0.0	0.0	0.0	0.0	0	0	0	0	0
Las Vegas	14.865932260363374	15.150206518615853	11.774079715008735	36.140631385977294	-115.297542535587	The Pug Mom	NV	The Lakes Las Vegas, NV 89117	0.0	0.0	0.0	0	2	0	1	0	0	0.0	0.0	0.0	0.0	0.0	0.0	0.0	0.0	1.0	0.0	0.0	0.0	0.0	0.0	0.0	0.0	0.0	0.0	0.0	0.0	0.0	0.0	0.0	0.0	0.0	0.0	0.0	0	0	0	0	0
Charlotte	2.288842207594752	26.79898931661252	2.67175009677715	35.2019933	-80.84375	Patou French Bistro	NC	1315 East Blvd Dilworth Charlotte, NC 28203	0.0	0.0	0.0	0	2	0	1	0	0	0.0	0.0	0.0	0.0	0.0	0.0	0.0	0.0	0.0	0.0	0.0	0.0	0.0	0.0	0.0	0.0	0.0	0.0	0.0	0.0	0.0	0.0	0.0	0.0	0.0	0.0	0.0	1	0	0	0	0
Phoenix	19.15855955186434	18.674476822279924	16.40622521461714	33.6037282	-111.9765897	Sports Authority	AZ	12869 North Tatum Blvd Phoenix, AZ 85032	4.962844630259907	0.6931471805599453	0.0	0	2	0	1	1	0	0.0	0.0	0.0	0.0	0.0	0.0	0.0	0.0	1.0	0.0	0.0	0.0	0.0	0.0	0.0	0.0	0.0	0.0	1.0	0.0	0.0	0.0	0.0	0.0	0.0	0.0	0.0	0	0	0	0	0
Phoenix	14.386943770230603	18.629971595624756	12.250414280307766	33.5749703	-112.12269609999998	Visionworks	AZ	9617 NW Metro Pkwy Ste1160 Phoenix, AZ 85051	0.0	0.0	0.0	0	2	0	1	0	0	0.0	0.0	0.0	0.0	0.0	0.0	0.0	0.0	1.0	0.0	0.0	0.0	0.0	0.0	0.0	0.0	0.0	0.0	0.0	0.0	0.0	0.0	0.0	0.0	0.0	0.0	0.0	0	0	0	0	0
Las Vegas	17.6223160565659	9.18890877317467	11.495799533244794	36.011512599999996	-115.1748529	Amazing Las Vegas Comic Con	NV	South Point Hotel & Casino 9777 S Las Vegas Blvd Southeast Las Vegas, NV 89183	3.4339872044851463	0.6931471805599453	0.0	0	2	0	1	1	0	0.0	0.0	0.0	0.0	0.0	0.0	0.0	0.0	1.0	0.0	0.0	0.0	0.0	0.0	0.0	0.0	0.0	0.0	0.0	1.0	0.0	0.0	0.0	0.0	0.0	0.0	0.0	0	0	0	0	0
Phoenix	7.127847802180651	1.4523736307110002	6.959353286139366	33.447654	-111.99798899999999	Park 'n Swap	AZ	3801 E Washington St Phoenix, AZ 85034	4.68213122712422	2.70805020110221	0.0	0	2	0	1	0	0	0.0	0.0	0.0	0.0	0.0	0.0	0.0	0.0	1.0	0.0	0.0	0.0	0.0	0.0	0.0	0.0	0.0	0.0	1.0	0.0	0.0	0.0	0.0	0.0	0.0	0.0	0.0	0	0	0	0	0
Phoenix	6.255985424169938	6.787783295609149	3.7801991896846543	33.495194	-112.03164720000001	La Purisima Bakery	AZ	2318 E Indian School Rd Phoenix, AZ 85016	3.4011973816621555	2.1972245773362196	0.0	0	2	0	1	0	0	0.0	0.0	0.0	0.0	0.0	0.0	0.0	0.0	0.0	0.0	0.0	0.0	0.0	0.0	0.0	0.0	0.0	0.0	1.0	0.0	0.0	0.0	0.0	0.0	0.0	0.0	0.0	0	0	0	0	0
Charlotte	5.3133644739459625	28.400526687770675	5.439727439011152	35.180566	-80.869185	Vision-Green Lawn Care	NC	4414 Applegate Rd Sedgefield Charlotte, NC 28209	0.0	0.0	0.0	0	2	0	1	0	0	0.0	0.0	0.0	0.0	0.0	0.0	0.0	0.0	1.0	0.0	0.0	0.0	0.0	0.0	0.0	0.0	0.0	0.0	0.0	0.0	0.0	0.0	0.0	0.0	0.0	0.0	0.0	0	0	0	0	0
Charlotte	1.2444326970788835	26.360839954208014	2.2515265277025702	35.213	-80.833733	Bank of America	NC	301 S Kings Dr Myers Park Charlotte, NC 28204	2.3978952727983707	0.6931471805599453	0.0	0	2	0	1	0	0	0.0	0.0	0.0	0.0	0.0	0.0	0.0	0.0	1.0	0.0	0.0	0.0	0.0	0.0	0.0	0.0	0.0	0.0	0.0	0.0	0.0	0.0	0.0	0.0	0.0	0.0	0.0	0	0	0	0	0
Pittsburgh	6.571322752056652	17.227550110922845	37.66805462037042	40.385065750254	-79.97837930917741	Family Restaurant	PA	2614 Brownsville Rd Carrick Pittsburgh, PA 15227	2.833213344056216	1.9459101490553132	0.0	2	2	0	1	1	0	1.0	0.0	0.0	1.0	1.0	1.0	1.0	1.0	1.0	0.0	0.0	0.0	0.0	0.0	1.0	0.0	0.0	0.0	0.0	0.0	0.0	0.0	0.0	0.0	0.0	0.0	0.0	1	0	0	0	0
Phoenix	26.68796403537249	26.532458840887607	23.89526561620618	33.6737677	-111.96383940000001	Saito's Japanese Steakhouse	AZ	5310 E High St Ste 115 Phoenix, AZ 85054	0.0	0.0	0.0	0	1	0	1	1	0	0.0	1.0	0.0	1.0	0.0	0.0	1.0	1.0	1.0	1.0	0.0	0.0	0.0	0.0	1.0	0.0	1.0	0.0	0.0	1.0	0.0	0.0	0.0	0.0	0.0	0.0	0.0	1	0	0	0	0
Las Vegas	6.707901157106564	8.672062923354247	4.824628208022206	36.1475932	-115.2061577	Greyhound's Books	NV	4704 W Sahara Ave Westside Las Vegas, NV 89102	0.0	0.0	0.0	0	2	0	1	1	0	0.0	0.0	0.0	0.0	0.0	0.0	0.0	0.0	1.0	0.0	0.0	0.0	0.0	0.0	0.0	0.0	0.0	0.0	0.0	0.0	0.0	0.0	0.0	0.0	0.0	0.0	0.0	0	0	0	0	0
Las Vegas	0.0383144898340492	8.561966915548677	6.546767713977116	36.166757000000004	-115.135551	King's Sausage	NV	917 Fremont St Downtown Las Vegas, NV 89101	3.258096538021482	1.791759469228055	0.0	0	1	0	1	0	2	0.0	0.0	0.0	1.0	1.0	0.0	1.0	1.0	1.0	0.0	0.0	0.0	0.0	0.0	1.0	0.0	1.0	0.0	1.0	0.0	0.0	0.0	0.0	0.0	0.0	0.0	0.0	1	0	0	0	0
Pittsburgh	6.657212498856631	24.230180026956205	35.766824286053804	40.433178600000005	-79.9227536	Sumi's Cakery	PA	2119 Murray Ave Squirrel Hill Pittsburgh, PA 15217	3.9889840465642745	1.0986122886681098	0.0	2	2	0	1	0	0	0.0	0.0	0.0	1.0	0.0	0.0	0.0	1.0	1.0	0.0	0.0	0.0	0.0	0.0	1.0	0.0	1.0	0.0	0.0	0.0	0.0	0.0	0.0	0.0	0.0	0.0	0.0	1	0	0	0	0
Charlotte	14.458090160274898	36.273719670590154	17.222569958651857	35.352548999999996	-80.85118100000001	Fossil Store	NC	6801 North Lake Mall Drive 173 Charlotte, NC 28216	2.70805020110221	0.0	0.0	0	2	0	1	0	0	0.0	0.0	0.0	0.0	0.0	0.0	0.0	0.0	0.0	0.0	0.0	0.0	0.0	0.0	0.0	0.0	0.0	0.0	0.0	0.0	0.0	0.0	0.0	0.0	0.0	0.0	0.0	0	0	0	0	0
Charlotte	9.364258529932727	36.10580126177993	11.989787142438697	35.22052502878879	-80.94382890537729	USO of North Carolina Charlotte	NC	Charlotte Douglas International Airport 5501 Josh Birmingham Pkwy Charlotte, NC 28208	5.351858133476067	2.70805020110221	0.0	0	2	0	0	0	0	0.0	0.0	0.0	0.0	0.0	0.0	0.0	0.0	1.0	0.0	0.0	0.0	0.0	0.0	0.0	0.0	0.0	0.0	0.0	0.0	0.0	0.0	0.0	0.0	0.0	0.0	0.0	0	0	0	0	0
Las Vegas	8.98942594542246	3.141312703539913	2.4933548853001524	36.0930248489319	-115.176037943193	Ron Jon Surf Shop	NV	3930 Las Vegas Blvd S Ste 130 The Strip Las Vegas, NV 89119	2.3978952727983707	1.0986122886681098	0.0	0	2	0	1	1	0	0.0	0.0	0.0	0.0	0.0	0.0	0.0	0.0	1.0	0.0	0.0	0.0	0.0	0.0	0.0	0.0	0.0	1.0	0.0	1.0	0.0	0.0	0.0	0.0	0.0	0.0	0.0	0	0	0	0	0
Phoenix	10.95482662789496	12.795944799638193	8.168994704961484	33.5478355	-112.04745690000001	Pointe Hilton Squaw Peak Resort	AZ	7677 N 16th St Phoenix, AZ 85020	6.729824070489475	3.6109179126442243	0.0	0	2	0	2	1	0	0.0	0.0	0.0	0.0	0.0	0.0	0.0	0.0	1.0	0.0	0.0	0.0	0.0	0.0	0.0	0.0	0.0	0.0	0.0	0.0	0.0	0.0	0.0	0.0	0.0	0.0	0.0	0	0	0	0	0
Phoenix	8.861434683354744	11.743900264761335	6.170073947682408	33.531283	-112.06607859999998	The Osselaer Company	AZ	532 E Maryland Avenue Phoenix, AZ 85012	0.0	0.6931471805599453	0.0	0	2	0	1	0	0	0.0	0.0	0.0	0.0	0.0	0.0	0.0	0.0	1.0	0.0	0.0	0.0	0.0	0.0	0.0	0.0	0.0	0.0	0.0	0.0	0.0	0.0	0.0	0.0	0.0	0.0	0.0	0	0	0	0	0
Las Vegas	6.416114589988338	2.912779017272833	1.1700867874653524	36.1122279471906	-115.15808174428699	Nikki Bee Airbrush Tanning	NV	Eastside Las Vegas, NV 89147	2.3978952727983707	0.6931471805599453	0.0	0	2	0	1	1	0	0.0	0.0	0.0	0.0	0.0	0.0	0.0	0.0	0.0	0.0	0.0	0.0	0.0	0.0	0.0	0.0	1.0	0.0	0.0	0.0	0.0	0.0	0.0	0.0	0.0	0.0	0.0	0	0	0	0	0
Pittsburgh	0.5005792438902117	20.829833717627718	41.74835906820711	40.4444316	-79.9956094	Ten Penny	PA	960 Penn Ave Downtown Pittsburgh, PA 15222	5.902633333401366	3.258096538021482	0.6931471805599453	0	1	0	1	1	0	0.0	0.0	0.0	1.0	1.0	0.0	1.0	0.0	1.0	1.0	0.0	0.0	0.0	0.0	1.0	0.0	0.0	0.0	0.0	1.0	0.0	0.0	0.0	0.0	0.0	0.0	0.0	1	0	0	0	0
Charlotte	14.992114606965623	19.743154997118694	11.866782192452588	35.09738529999999	-80.778824	McAlister's Deli	NC	8046-D Providence Road Arboretum Charlotte, NC 28227	3.58351893845611	1.0986122886681098	0.0	0	2	0	0	0	0	1.0	0.0	0.0	1.0	0.0	1.0	0.0	1.0	1.0	0.0	0.0	0.0	0.0	0.0	1.0	0.0	0.0	0.0	0.0	0.0	0.0	0.0	0.0	0.0	0.0	0.0	0.0	1	1	0	0	0
Madison	8.801430638367991	15.975031378121445	7.975508184288889	43.056081	-89.4976609	Maharaja Restaurant	WI	6713 Odana Rd Madison, WI 53719	5.673323267171493	2.833213344056216	0.0	0	1	0	0	1	0	0.0	0.0	0.0	1.0	0.0	1.0	1.0	1.0	1.0	1.0	0.0	0.0	0.0	0.0	1.0	0.0	0.0	0.0	1.0	0.0	0.0	0.0	0.0	0.0	0.0	0.0	0.0	1	0	0	0	0
Las Vegas	5.589312588360095	6.204288469160218	7.12918993674431	36.130006	-115.09358200000001	Wo Fat	NV	3700 E Desert Inn Rd Ste 1 Eastside Las Vegas, NV 89121	5.700443573390687	3.8066624897703196	0.0	0	2	0	1	0	0	0.0	0.0	0.0	1.0	0.0	1.0	1.0	1.0	1.0	0.0	0.0	0.0	0.0	0.0	1.0	0.0	0.0	0.0	1.0	0.0	0.0	0.0	0.0	0.0	0.0	0.0	0.0	1	0	0	0	0
Las Vegas	6.085387616983788	4.405114502365344	0.6477790088547469	36.120806829250604	-115.171853005886	Bikini Bay	NV	3377 Las Vegas Blvd S Ste 2400 The Strip Las Vegas, NV 89109	1.791759469228055	0.6931471805599453	0.0	0	2	0	1	1	0	0.0	0.0	0.0	0.0	0.0	0.0	0.0	0.0	1.0	0.0	0.0	0.0	0.0	0.0	0.0	0.0	0.0	0.0	0.0	0.0	0.0	0.0	0.0	0.0	0.0	0.0	0.0	0	0	0	0	0
Las Vegas	13.498387572162773	15.095139821694977	11.444918521573786	36.159531469592	-115.285329106617	The Melting Pot	NV	8704 W Charleston Blvd Westside Las Vegas, NV 89117	5.978885764901122	3.828641396489095	0.0	2	1	0	1	2	0	0.0	0.0	0.0	1.0	0.0	0.0	1.0	1.0	1.0	1.0	0.0	0.0	0.0	0.0	0.0	0.0	0.0	0.0	1.0	0.0	0.0	0.0	0.0	0.0	0.0	0.0	0.0	1	0	0	0	0
Phoenix	20.96253818683879	23.217840559217745	18.296861601838255	33.640609940248396	-112.067620099298	Panera Bread	AZ	375 E Bell Rd Phoenix, AZ 85002	2.302585092994046	1.0986122886681098	0.0	0	2	0	1	0	0	0.0	1.0	0.0	1.0	0.0	0.0	0.0	1.0	1.0	0.0	0.0	0.0	0.0	0.0	1.0	0.0	0.0	0.0	0.0	0.0	0.0	0.0	0.0	0.0	0.0	0.0	0.0	1	1	0	0	0
Madison	3.4866101096165396	11.857279101235276	2.813762004758813	43.0576349	-89.4284459	Knitting Tree	WI	2614 Monroe St Dudgeon-Monroe Madison, WI 53711	0.0	0.0	0.0	0	2	0	1	2	0	0.0	0.0	0.0	0.0	0.0	0.0	0.0	0.0	1.0	0.0	0.0	0.0	0.0	0.0	0.0	0.0	1.0	0.0	1.0	0.0	0.0	0.0	0.0	0.0	0.0	0.0	0.0	0	0	0	0	0
Charlotte	16.811570061783847	33.553574836288604	18.69693018610263	35.367148	-80.785935	S K Shoe Repair & Alterations	NC	5342 Prosperity Church Rd Ste C Highland Creek Charlotte, NC 28269	1.6094379124341003	0.6931471805599453	0.0	0	2	0	1	0	0	0.0	0.0	0.0	0.0	0.0	0.0	0.0	0.0	1.0	0.0	0.0	0.0	0.0	0.0	0.0	0.0	0.0	0.0	0.0	0.0	0.0	0.0	0.0	0.0	0.0	0.0	0.0	0	0	0	0	0
Las Vegas	3.3662189602616976	5.656416050818415	3.216599242322834	36.1399463	-115.1522803	Hilton Grand Vacations Las Vegas Convention Center	NV	Las Vegas Convention Center 455 Karen Ave Eastside Las Vegas, NV 89109	5.860786223465865	3.2188758248682006	0.0	0	2	0	2	1	0	0.0	0.0	0.0	0.0	0.0	0.0	0.0	0.0	1.0	0.0	0.0	0.0	0.0	0.0	0.0	0.0	0.0	0.0	0.0	0.0	0.0	0.0	0.0	0.0	0.0	0.0	0.0	0	0	0	0	0
Las Vegas	17.870243310348396	12.863973335202427	11.739257457478516	36.0544216948886	-115.27740825747802	Glazier's Food Marketplace	NV	8525 W Warm Springs Rd Southwest Las Vegas, NV 89113	7.945909598613133	4.867534450455582	2.1972245773362196	0	0	0	1	1	0	0.0	0.0	0.0	1.0	0.0	1.0	0.0	1.0	1.0	0.0	0.0	0.0	0.0	0.0	1.0	0.0	0.0	0.0	1.0	0.0	0.0	0.0	0.0	0.0	0.0	0.0	0.0	1	0	0	0	0
Las Vegas	10.619072261448512	15.237055124767345	11.402147296314368	36.196440700000004	-115.24796200000002	Wendy's	NV	7150 W Lake Mead Boulevard Las Vegas, NV 89128	3.6109179126442243	1.791759469228055	0.0	0	2	0	1	0	0	0.0	0.0	1.0	1.0	0.0	0.0	0.0	1.0	1.0	0.0	0.0	0.0	0.0	0.0	1.0	0.0	0.0	0.0	0.0	0.0	0.0	0.0	0.0	0.0	0.0	0.0	0.0	1	0	1	0	0
Las Vegas	12.519104374452807	17.813671793461744	13.997300781555674	36.218618	-115.25943000000001	Mr Bill's Pipe & Tobacco Co	NV	7460 W Cheyenne Ave Northwest Las Vegas, NV 89129	2.4849066497880004	0.0	0.0	0	2	0	1	2	0	0.0	0.0	0.0	0.0	0.0	0.0	0.0	0.0	1.0	0.0	0.0	0.0	0.0	0.0	0.0	0.0	0.0	0.0	0.0	0.0	0.0	0.0	0.0	0.0	0.0	0.0	0.0	0	0	0	0	0
Las Vegas	6.907410064078857	8.443483494589698	4.596862864373283	36.144152500000004	-115.20695490000001	Jimmy John's Gourmet Sandwiches	NV	2530 S Decatur Blvd Westside Las Vegas, NV 89102	2.833213344056216	2.0794415416798357	0.0	0	2	0	1	0	0	1.0	1.0	0.0	1.0	0.0	0.0	0.0	1.0	1.0	0.0	0.0	0.0	0.0	0.0	1.0	0.0	0.0	0.0	0.0	0.0	0.0	0.0	0.0	0.0	0.0	0.0	0.0	1	1	0	0	0
Edinburgh	0.7052447901600879	9.974121713296677	0.602824743377173	55.95395870000001	-3.1994861	Dusit Restaurant	EDH	49a Thistle Street New Town Edinburgh EH2 1DY	2.772588722239781	1.0986122886681098	0.0	1	1	0	1	2	0	0.0	0.0	0.0	1.0	0.0	1.0	1.0	1.0	1.0	1.0	0.0	0.0	0.0	0.0	1.0	0.0	1.0	0.0	0.0	0.0	0.0	0.0	0.0	0.0	0.0	0.0	0.0	1	0	0	0	0
Phoenix	10.016088496027463	6.8765764783848615	8.194759170100127	33.4948197	-111.97982079999998	NextCare Urgent Care	AZ	4730 E. Indian School Rd. Ste 211 Phoenix, AZ 85018	3.1354942159291497	1.0986122886681098	0.0	0	2	0	1	0	0	0.0	0.0	0.0	0.0	0.0	0.0	0.0	0.0	0.0	0.0	0.0	0.0	0.0	0.0	0.0	0.0	0.0	0.0	0.0	0.0	0.0	0.0	0.0	0.0	0.0	0.0	0.0	0	0	0	0	0
Phoenix	5.431813673492784	11.7484789118577	6.865151944820349	33.4514049	-112.1329217	Sun Star Buffet	AZ	3420 W Van Buren St Phoenix, AZ 85009	1.791759469228055	1.0986122886681098	0.0	0	2	0	1	0	0	0.0	0.0	0.0	1.0	0.0	0.0	0.0	0.0	1.0	0.0	0.0	0.0	0.0	0.0	0.0	0.0	0.0	0.0	0.0	0.0	0.0	0.0	0.0	0.0	0.0	0.0	0.0	1	0	0	0	0
Las Vegas	3.1357356250195534	8.479444147709776	7.872183193459218	36.1592062547375	-115.102137029171	Paul's Neon Signs	NV	3230 E Charleston Blvd Ste 116 Downtown Las Vegas, NV 89104	0.0	0.0	0.0	0	2	0	1	0	0	0.0	0.0	0.0	0.0	0.0	0.0	0.0	0.0	1.0	0.0	0.0	0.0	0.0	0.0	0.0	0.0	0.0	0.0	0.0	0.0	0.0	0.0	0.0	0.0	0.0	0.0	0.0	0	0	0	0	0
Las Vegas	16.10440855429787	10.162655030021206	9.653715434325173	36.0516478511533	-115.24398646819598	Eldorado Cleaners	NV	7537 S Rainbow Blvd Ste 107 Southwest Las Vegas, NV 89113	3.367295829986474	1.0986122886681098	0.0	0	2	0	1	0	0	0.0	0.0	0.0	0.0	0.0	0.0	0.0	0.0	1.0	0.0	0.0	0.0	0.0	0.0	0.0	0.0	0.0	0.0	1.0	0.0	0.0	0.0	0.0	0.0	0.0	0.0	0.0	0	0	0	0	0
Las Vegas	7.589385936599626	6.93162497082544	3.2308918567046745	36.126595200000004	-115.203552	Big Foot Massage	NV	4560 Spring Mountain Rd Chinatown Las Vegas, NV 89102	2.3978952727983707	1.0986122886681098	0.0	0	2	0	1	1	0	0.0	0.0	0.0	0.0	0.0	0.0	0.0	0.0	1.0	0.0	0.0	0.0	0.0	0.0	0.0	0.0	0.0	0.0	1.0	0.0	0.0	0.0	0.0	0.0	0.0	0.0	0.0	0	0	0	0	0
Edinburgh	1.6833827888461783	10.689405935080782	1.2291696783516646	55.938307200000004	-3.1923589	Fruit Connection	EDH	6 Roseneath Street Marchmont Edinburgh EH9 1JH	0.0	0.0	0.0	0	2	0	1	0	0	0.0	0.0	0.0	0.0	0.0	0.0	0.0	0.0	1.0	0.0	0.0	0.0	0.0	0.0	0.0	0.0	0.0	0.0	0.0	0.0	0.0	0.0	0.0	0.0	0.0	0.0	0.0	0	0	0	0	0
Phoenix	17.061815220111093	13.164268133521578	18.961053007323056	33.3215751	-111.9766942	FedEx Office Print & Ship Center	AZ	4940 E Ray Rd Phoenix, AZ 85044	3.912023005428146	1.9459101490553132	0.0	0	2	0	1	0	0	0.0	0.0	0.0	0.0	0.0	0.0	0.0	0.0	1.0	0.0	0.0	0.0	0.0	0.0	0.0	0.0	0.0	0.0	0.0	0.0	0.0	0.0	0.0	0.0	0.0	0.0	0.0	0	0	0	0	0
Las Vegas	5.018536655798678	7.203757858784861	3.5018239687475776	36.1446761427725	-115.18403291702299	Dairy Queen	NV	3160 W Sahara Ave Westside Las Vegas, NV 89102	4.189654742026425	2.0794415416798357	0.6931471805599453	0	2	0	1	0	0	0.0	1.0	1.0	1.0	1.0	0.0	0.0	1.0	1.0	0.0	0.0	0.0	0.0	0.0	1.0	0.0	0.0	0.0	1.0	0.0	0.0	0.0	0.0	0.0	0.0	0.0	0.0	1	0	1	0	0
Pittsburgh	6.964076184994809	13.428776996332358	42.986064568510926	40.388349	-80.04332	Koda Bridal	PA	246 Washington Rd Pittsburgh, PA 15216	0.0	0.0	0.0	0	2	0	1	1	0	0.0	0.0	0.0	0.0	0.0	0.0	0.0	0.0	1.0	0.0	0.0	0.0	0.0	0.0	0.0	0.0	0.0	0.0	1.0	0.0	0.0	0.0	0.0	0.0	0.0	0.0	0.0	0	0	0	0	0
Edinburgh	1.3777233689296537	9.338730068295703	0.7299691455286746	55.9515404	-3.2101096	La P'Tite Folie	EDH	9 Randolph Place New Town Edinburgh EH3 7TE	1.6094379124341003	0.6931471805599453	0.0	0	0	0	1	1	0	0.0	0.0	0.0	1.0	0.0	0.0	1.0	0.0	0.0	1.0	0.0	0.0	0.0	0.0	0.0	0.0	0.0	0.0	0.0	0.0	0.0	0.0	0.0	0.0	0.0	0.0	0.0	1	0	0	0	0
Edinburgh	1.3305805244319169	9.42544836945197	0.612928213630001	55.95040127929621	-3.2089519500732404	Oddbins	EDH	5 Queensferry St West End Edinburgh EH2 4PA	2.6390573296152584	0.6931471805599453	0.0	0	2	0	1	0	0	0.0	0.0	0.0	0.0	0.0	0.0	0.0	0.0	0.0	0.0	0.0	0.0	0.0	0.0	0.0	0.0	0.0	0.0	0.0	0.0	0.0	0.0	0.0	0.0	0.0	0.0	0.0	0	0	0	0	0
Las Vegas	5.903497142215638	3.328299268276458	1.2242283585165135	36.1168604	-115.15718590000002	Right C3, LLC	NV	3960 Howard Hughes Pkwy Eastside Las Vegas, NV 89169	0.0	0.0	0.0	0	2	0	1	0	0	0.0	0.0	0.0	0.0	0.0	0.0	0.0	0.0	0.0	0.0	0.0	0.0	0.0	0.0	0.0	0.0	0.0	0.0	0.0	0.0	0.0	0.0	0.0	0.0	0.0	0.0	0.0	0	0	0	0	0
Las Vegas	5.268117205723599	9.97003584510557	6.323465329390376	36.168759	-115.19411699999999	Centurylink	NV	330 S Valley View Blvd Westside Las Vegas, NV 89107	0.0	0.0	0.0	0	2	0	1	3	0	0.0	0.0	0.0	0.0	0.0	0.0	0.0	0.0	1.0	0.0	0.0	0.0	0.0	0.0	0.0	0.0	0.0	0.0	0.0	0.0	0.0	0.0	0.0	0.0	0.0	0.0	0.0	0	0	0	0	0
Phoenix	2.6601600908453626	6.714650386636197	0.15089652895362518	33.4743013	-112.0649235	Trente-Cinq	AZ	2333 N 7th St Phoenix, AZ 85006	0.0	0.0	0.0	0	1	0	1	2	0	0.0	0.0	0.0	1.0	0.0	0.0	1.0	0.0	1.0	1.0	0.0	0.0	0.0	0.0	0.0	0.0	0.0	0.0	1.0	0.0	0.0	0.0	0.0	0.0	0.0	0.0	0.0	1	0	0	0	0
Las Vegas	2.5918783462265207	8.943654331905945	5.918401685848158	36.168156	-115.164378	Mayan Plaza Apartments	NV	1700 Alta Dr Downtown Las Vegas, NV 89106	1.9459101490553132	0.6931471805599453	0.0	0	2	0	1	0	0	0.0	0.0	0.0	0.0	0.0	0.0	0.0	0.0	0.0	0.0	0.0	0.0	0.0	0.0	0.0	0.0	0.0	0.0	0.0	0.0	0.0	0.0	0.0	0.0	0.0	0.0	0.0	0	0	0	0	0
Las Vegas	17.18669000155202	12.252869655764092	11.064022207610535	36.0586791409856	-115.271924076178	Quest Diagnostics	NV	8285 W Arby Ave Ste 190 Spring Valley Las Vegas, NV 89113	2.5649493574615367	0.0	0.0	0	2	0	1	0	0	0.0	0.0	0.0	0.0	0.0	0.0	0.0	0.0	0.0	0.0	0.0	0.0	0.0	0.0	0.0	0.0	0.0	0.0	0.0	0.0	0.0	0.0	0.0	0.0	0.0	0.0	0.0	0	0	0	0	0
Pittsburgh	0.1427376856062037	20.491387124710066	41.91561746138759	40.442628899999995	-79.9991141	Chick Clothing Boutique	PA	717 Liberty Ave Downtown Pittsburgh, PA 15219	0.0	0.0	0.0	0	2	0	1	2	0	0.0	0.0	0.0	0.0	0.0	0.0	0.0	0.0	0.0	0.0	0.0	0.0	0.0	0.0	0.0	0.0	0.0	0.0	0.0	0.0	0.0	0.0	0.0	0.0	0.0	0.0	0.0	0	0	0	0	0
Las Vegas	13.841275482796195	15.640598599419631	11.970696790932928	36.163605006297495	-115.28937414907301	Hussong's Cantina	NV	740 S Rampart Blvd Ste 7 Westside Las Vegas, NV 89145	5.730099782973574	2.833213344056216	0.0	0	1	0	0	1	0	0.0	1.0	0.0	1.0	1.0	0.0	1.0	1.0	1.0	0.0	1.0	0.0	0.0	0.0	1.0	0.0	0.0	0.0	1.0	0.0	0.0	0.0	0.0	0.0	0.0	0.0	1.0	1	0	0	1	0
Las Vegas	3.7848473065843176	4.982115807602072	2.9896149970328634	36.1343713	-115.1474452	Las Vegas Country Club	NV	3000 Joe W Brown Dr Eastside Las Vegas, NV 89109	4.77912349311153	2.302585092994046	0.0	0	2	0	1	0	0	0.0	0.0	0.0	0.0	0.0	0.0	0.0	0.0	1.0	0.0	0.0	0.0	0.0	0.0	0.0	0.0	0.0	0.0	0.0	0.0	0.0	0.0	0.0	0.0	0.0	0.0	0.0	0	0	0	0	0
Las Vegas	10.87588464414409	9.925029900910976	6.636042354297491	36.1231733966801	-115.243630150459	IHOP	NV	3595 S Rainbow Blvd Chinatown Las Vegas, NV 89117	5.634789603169249	2.9444389791664403	0.0	0	2	0	1	1	0	0.0	0.0	0.0	1.0	0.0	0.0	1.0	1.0	1.0	0.0	0.0	0.0	0.0	0.0	1.0	0.0	0.0	0.0	1.0	0.0	0.0	0.0	0.0	0.0	0.0	0.0	0.0	1	0	0	0	0
Las Vegas	9.8897991681914	6.030885269583572	3.7232532729090626	36.099540179126	-115.207263883085	Foods 2 Go	NV	5000 S Decatur Blvd Ste 1 Las Vegas, NV 89103	3.044522437723423	1.6094379124341003	0.6931471805599453	0	2	0	1	0	0	0.0	0.0	0.0	0.0	0.0	0.0	0.0	0.0	1.0	0.0	0.0	0.0	0.0	0.0	1.0	0.0	0.0	0.0	0.0	0.0	0.0	0.0	0.0	0.0	0.0	0.0	0.0	1	0	0	0	0
Las Vegas	18.215884924645604	13.347971539228668	12.145434094365841	36.054812	-115.28318600000001	Preferred Family Dentistry	NV	8785 W Warm Springs Rd Ste 108 Southwest Las Vegas, NV 89148	2.1972245773362196	1.0986122886681098	0.0	0	2	0	1	0	0	0.0	0.0	0.0	0.0	0.0	0.0	0.0	0.0	0.0	0.0	0.0	0.0	0.0	0.0	0.0	0.0	0.0	0.0	0.0	0.0	0.0	0.0	0.0	0.0	0.0	0.0	0.0	0	0	0	0	0
Pittsburgh	6.55579188796091	25.935037193094097	37.62905856815733	40.4592997	-79.9265915	Top Gear Bicycle Shop	PA	5956 Penn Cir S Shadyside Pittsburgh, PA 15206	2.4849066497880004	1.6094379124341003	0.0	0	2	0	1	2	0	0.0	0.0	0.0	0.0	0.0	0.0	0.0	0.0	1.0	0.0	0.0	0.0	0.0	0.0	0.0	0.0	0.0	0.0	1.0	1.0	0.0	0.0	0.0	0.0	0.0	0.0	0.0	0	0	0	0	0
Pittsburgh	6.841075596778371	26.264186514690092	37.590167632582606	40.461506	-79.923991	Zeke's Coffee	PA	6015 Penn Ave East Liberty Pittsburgh, PA 15206	5.075173815233827	2.4849066497880004	0.0	0	2	0	0	0	0	0.0	1.0	0.0	1.0	0.0	1.0	0.0	1.0	1.0	0.0	0.0	0.0	0.0	0.0	1.0	0.0	1.0	0.0	0.0	0.0	0.0	0.0	0.0	0.0	0.0	0.0	0.0	1	0	0	0	0
Phoenix	3.225747848517755	8.297610890005494	1.55692745370518	33.4803022	-112.0807878	Hamburger Haven	AZ	507 W Thomas Rd Phoenix, AZ 85013	2.833213344056216	0.6931471805599453	0.0	0	2	0	0	0	0	1.0	0.0	0.0	0.0	0.0	0.0	0.0	1.0	1.0	0.0	0.0	0.0	0.0	0.0	1.0	0.0	0.0	0.0	1.0	0.0	0.0	0.0	0.0	0.0	0.0	0.0	0.0	1	1	1	0	0
Edinburgh	0.17755065902376424	10.656081982470383	0.9942183237591631	55.954843000000004	-3.188431	Game	EDH	32 St James' Centre New Town Edinburgh EH1 3SL	1.9459101490553132	0.6931471805599453	0.0	0	2	0	1	1	0	0.0	0.0	0.0	0.0	0.0	0.0	0.0	0.0	1.0	0.0	0.0	0.0	0.0	0.0	0.0	0.0	0.0	0.0	0.0	0.0	0.0	0.0	0.0	0.0	0.0	0.0	0.0	0	0	0	0	0
Las Vegas	6.670268810240259	3.809035206894852	0.09298397828593631	36.1142773	-115.1709763	Honolulu Cookie Company	NV	3645 Las Vegas Blvd S Ste102 The Strip Las Vegas, NV 89109	4.07753744390572	1.3862943611198906	0.0	0	2	0	1	1	0	0.0	0.0	0.0	0.0	0.0	0.0	0.0	0.0	1.0	0.0	0.0	0.0	0.0	0.0	0.0	0.0	0.0	0.0	0.0	1.0	0.0	0.0	0.0	0.0	0.0	0.0	0.0	0	0	0	0	0
Las Vegas	12.714520790999742	9.731360608506725	12.716525842639976	36.08804	-115.03336200000001	Arzano	NV	6275 Boulder Hwy Southeast Las Vegas, NV 89122	3.912023005428146	3.091042453358316	0.0	0	2	0	1	0	0	0.0	0.0	0.0	0.0	0.0	0.0	0.0	0.0	1.0	0.0	0.0	0.0	0.0	0.0	0.0	0.0	0.0	0.0	0.0	0.0	0.0	0.0	0.0	0.0	0.0	0.0	0.0	0	0	0	0	0
Phoenix	38.45294816471755	40.411414204128505	35.78962146719018	33.7983301	-112.0670277	CSI Construction	AZ	515 E Carefree Hwy Phoenix, AZ 85085	0.0	0.0	0.0	0	2	0	1	0	0	0.0	0.0	0.0	0.0	0.0	0.0	0.0	0.0	1.0	0.0	0.0	0.0	0.0	0.0	0.0	0.0	0.0	0.0	0.0	0.0	0.0	0.0	0.0	0.0	0.0	0.0	0.0	0	0	0	0	0
Edinburgh	2.398550815902959	8.782447991966022	1.5230138612502393	55.942789000000005	-3.2218269153443098	Kebabish Original	MLN	128 Dalry Road Haymarket Edinburgh EH11 2EZ	3.2188758248682006	1.3862943611198906	0.0	0	2	0	1	1	0	0.0	0.0	0.0	1.0	1.0	0.0	1.0	1.0	1.0	1.0	0.0	0.0	0.0	0.0	1.0	0.0	0.0	0.0	0.0	0.0	0.0	0.0	0.0	0.0	0.0	0.0	0.0	1	0	1	0	0
Phoenix	9.839297985745096	16.125424715121003	9.725163734083392	33.4946104	-112.1671471	Rainbow Donuts	AZ	5001 W Indian School Rd Phoenix, AZ 85031	3.332204510175204	0.6931471805599453	0.0	0	2	0	1	0	0	0.0	0.0	0.0	0.0	0.0	0.0	0.0	0.0	1.0	0.0	0.0	0.0	0.0	0.0	0.0	0.0	0.0	0.0	1.0	0.0	0.0	0.0	0.0	0.0	0.0	0.0	0.0	0	0	0	0	0
Las Vegas	5.075928089977891	7.149446622239857	3.4363995148982256	36.1439743670324	-115.184268951416	Pizza Hut	NV	3001 W. Sahara Ave. Westside Las Vegas, NV 89102	3.6635616461296463	1.9459101490553132	0.0	0	2	0	1	0	0	1.0	1.0	0.0	1.0	1.0	0.0	1.0	1.0	1.0	0.0	0.0	0.0	0.0	0.0	1.0	0.0	0.0	0.0	0.0	0.0	0.0	0.0	0.0	0.0	0.0	0.0	0.0	1	0	0	0	1
Las Vegas	17.217628864581883	14.071100675334383	11.919833256041056	36.0844736	-115.2974919	Premier Baseball Academy	NV	5752 S Fort Apache Ste 125 Spring Valley Las Vegas, NV 89148	4.672828834461906	1.6094379124341003	0.0	0	2	0	1	0	0	0.0	0.0	0.0	0.0	0.0	0.0	0.0	1.0	0.0	0.0	0.0	0.0	0.0	0.0	0.0	0.0	0.0	0.0	0.0	0.0	0.0	0.0	0.0	0.0	0.0	0.0	0.0	0	0	0	0	0
Charlotte	0.31883819635037697	27.597830044630278	3.747022908961824	35.2251811	-80.842261	BlackFinn American Saloon	NC	210 E Trade St Ste B-120 Uptown Charlotte, NC 28202	6.428105272684596	3.8918202981106265	0.0	0	1	0	0	1	1	0.0	1.0	0.0	1.0	1.0	1.0	1.0	0.0	1.0	1.0	1.0	0.0	0.0	0.0	1.0	0.0	0.0	0.0	0.0	1.0	0.0	1.0	0.0	0.0	0.0	0.0	0.0	1	0	0	1	0
Charlotte	2.5398799067406768	28.462107595061116	4.304636385949964	35.206638618308396	-80.8611153025064	The Wine Loft	NC	2201 South Blvd South End Charlotte, NC 28203	5.081404364984463	3.1780538303479458	0.0	0	1	1	0	1	0	0.0	1.0	0.0	1.0	1.0	0.0	1.0	0.0	1.0	1.0	0.0	0.0	0.0	0.0	0.0	0.0	1.0	0.0	1.0	0.0	0.0	0.0	0.0	0.0	0.0	0.0	1.0	1	0	0	1	0
Phoenix	3.5849616834969398	9.212790263002521	2.6134954664759444	33.4802606	-112.0925565	Encanto Family Dental Care	AZ	1525 W Thomas Rd Phoenix, AZ 85015	1.9459101490553132	1.3862943611198906	0.0	0	2	0	1	0	0	0.0	0.0	0.0	0.0	0.0	0.0	0.0	0.0	0.0	0.0	0.0	0.0	0.0	0.0	0.0	0.0	0.0	0.0	0.0	0.0	0.0	0.0	0.0	0.0	0.0	0.0	0.0	0	0	0	0	0
Charlotte	6.330541555507555	21.590686442557747	4.509297837824923	35.220455	-80.77150999999999	Kilborne Park	NC	2600 Kilborne Dr Eastland Charlotte, NC 28205	2.772588722239781	1.3862943611198906	0.0	0	2	0	1	0	0	0.0	0.0	0.0	0.0	0.0	0.0	0.0	1.0	0.0	0.0	0.0	0.0	0.0	0.0	0.0	0.0	0.0	0.0	0.0	0.0	0.0	0.0	0.0	0.0	0.0	0.0	0.0	0	0	0	0	0
Las Vegas	9.428480726412124	5.670188078562527	3.2352027105084664	36.1017747779166	-115.20258615950199	Brendan's	NV	4500 Tropicana Las Vegas, NV 89121	4.07753744390572	1.3862943611198906	0.0	1	1	0	1	1	2	0.0	0.0	0.0	1.0	1.0	0.0	0.0	0.0	1.0	0.0	1.0	1.0	0.0	0.0	0.0	0.0	0.0	0.0	0.0	0.0	0.0	0.0	0.0	0.0	1.0	0.0	1.0	0	0	0	1	0
Edinburgh	0.32806843120673124	10.820746077218148	0.8563990783935781	55.950486399999996	-3.1864502999999997	The Mitre	EDH	131-133 High Street Old Town Edinburgh EH1 1SG	4.672828834461906	1.3862943611198906	0.0	2	1	0	1	1	1	0.0	1.0	0.0	1.0	1.0	0.0	0.0	0.0	1.0	0.0	0.0	0.0	0.0	0.0	0.0	0.0	0.0	0.0	0.0	0.0	0.0	0.0	0.0	0.0	0.0	0.0	0.0	0	0	0	1	0
Edinburgh	6.712423895973731	4.521424616401287	5.928869627786585	55.942577242011204	-3.29400860921022	Bar B Que	EDH	Saint John's Road Corstorphine Edinburgh EH12	0.0	0.0	0.0	0	2	0	1	0	0	0.0	0.0	0.0	0.0	0.0	0.0	0.0	0.0	0.0	0.0	0.0	0.0	0.0	0.0	1.0	0.0	0.0	0.0	0.0	0.0	0.0	0.0	0.0	0.0	0.0	0.0	0.0	1	0	0	0	0
Phoenix	9.622872709718912	12.330849906090258	6.9169007595770164	33.538019399999996	-112.0640735	Whataburger Restaurants	AZ	717 E Glendale Ave Phoenix, AZ 85020	0.0	0.0	0.0	0	2	0	1	0	0	0.0	0.0	0.0	0.0	0.0	0.0	0.0	0.0	0.0	0.0	0.0	0.0	0.0	0.0	1.0	0.0	0.0	0.0	0.0	0.0	0.0	0.0	0.0	0.0	0.0	0.0	0.0	1	0	0	0	0
Pittsburgh	6.399594725215466	25.736353245867274	37.625240337565025	40.45778129999999	-79.9279191	Leaf and Plate	PA	5884 Ellsworth Ave 1st Fl Shadyside Pittsburgh, PA 15232	0.0	0.0	0.0	2	2	0	0	1	0	0.0	1.0	0.0	0.0	0.0	0.0	1.0	0.0	1.0	1.0	0.0	0.0	0.0	0.0	1.0	0.0	1.0	0.0	1.0	0.0	0.0	0.0	0.0	0.0	0.0	0.0	0.0	1	0	0	0	0
Edinburgh	1.3960831402908216	9.70590013899196	0.5114740700372932	55.945446	-3.2057564	Odeon Cinemas	EDH	118 Lothian Rd West End Edinburgh EH3 9BG	3.2188758248682006	0.0	0.0	0	2	0	1	0	0	0.0	0.0	0.0	0.0	0.0	0.0	0.0	1.0	0.0	0.0	0.0	0.0	0.0	0.0	0.0	0.0	0.0	0.0	0.0	0.0	0.0	0.0	0.0	0.0	0.0	0.0	0.0	0	0	0	0	0
Madison	8.535849767653648	5.560204392911444	9.322857628354576	43.105772738222505	-89.2966997634422	Eastside Coin Laundry	WI	4921 Commercial Ave Madison, WI 53704	2.1972245773362196	1.3862943611198906	0.0	0	2	0	0	1	0	0.0	0.0	0.0	0.0	0.0	0.0	0.0	0.0	1.0	0.0	0.0	0.0	0.0	0.0	0.0	0.0	0.0	0.0	1.0	0.0	0.0	0.0	0.0	0.0	0.0	0.0	0.0	0	0	0	0	0
Phoenix	6.9602819595499765	8.336475064125144	4.215158275961785	33.507455	-112.040131	Old Navy Clothing	AZ	1949 E Camelback Rd Phoenix, AZ 85016	5.147494476813453	1.3862943611198906	0.0	0	2	0	1	1	0	0.0	0.0	0.0	0.0	0.0	0.0	0.0	0.0	1.0	0.0	0.0	0.0	0.0	0.0	0.0	0.0	0.0	0.0	1.0	0.0	0.0	0.0	0.0	0.0	0.0	0.0	0.0	0	0	0	0	0
Las Vegas	6.3641550590662375	4.263708733429676	0.42603996333229344	36.1183949	-115.1729418	Lasalsa Cantina Mexican Fare	NV	3500 Las Vegas Blvd S The Strip Las Vegas, NV 89109	4.219507705176107	1.0986122886681098	0.0	3	1	0	1	1	0	0.0	1.0	0.0	1.0	1.0	0.0	1.0	1.0	1.0	0.0	0.0	0.0	0.0	0.0	1.0	0.0	0.0	0.0	0.0	0.0	0.0	0.0	0.0	0.0	0.0	0.0	0.0	1	0	0	0	0
Las Vegas	20.920835633249297	16.24640578497887	14.987039750088224	36.0457187	-115.31339080000001	ColoredROOM	NV	Southwest Las Vegas, NV 89178	0.0	0.6931471805599453	0.0	0	2	0	1	0	0	0.0	0.0	0.0	0.0	0.0	0.0	0.0	0.0	1.0	0.0	0.0	0.0	0.0	0.0	0.0	0.0	0.0	0.0	0.0	0.0	0.0	0.0	0.0	0.0	0.0	0.0	0.0	0	0	0	0	0
Phoenix	7.626996623184866	4.861232141431329	6.053253832669265	33.480755800000004	-112.00013670000001	Ole Brass Rail	AZ	3738 E Thomas Rd Phoenix, AZ 85018	5.634789603169249	3.332204510175204	0.0	0	1	0	1	0	1	0.0	1.0	0.0	1.0	1.0	0.0	1.0	0.0	1.0	0.0	1.0	0.0	0.0	0.0	0.0	0.0	0.0	0.0	1.0	0.0	0.0	0.0	0.0	0.0	0.0	1.0	0.0	1	0	0	1	0
Las Vegas	5.580017730356682	10.472859791096512	6.813737336405742	36.172531899999996	-115.197258	Industrial Ride Shop	NV	Meadows Mall 4300 Meadows Ln Westside Las Vegas, NV 89107	2.302585092994046	0.0	0.0	0	2	0	1	2	0	0.0	0.0	0.0	0.0	0.0	0.0	0.0	0.0	1.0	0.0	0.0	0.0	0.0	0.0	0.0	0.0	0.0	0.0	0.0	0.0	0.0	0.0	0.0	0.0	0.0	0.0	0.0	0	0	0	0	0
Phoenix	0.3962086625657929	6.04577069842848	2.944082311851567	33.449608399999995	-112.07104540000002	JPG Home Security and Consulting	AZ	125 N 2nd St Phoenix, AZ 85004	1.6094379124341003	1.0986122886681098	0.0	0	2	0	1	0	0	0.0	0.0	0.0	0.0	0.0	0.0	0.0	0.0	1.0	0.0	0.0	0.0	0.0	0.0	0.0	0.0	0.0	0.0	0.0	0.0	0.0	0.0	0.0	0.0	0.0	0.0	0.0	0	0	0	0	0
Charlotte	14.33209894637618	27.862589499982526	12.63860267944773	35.095286	-80.868365	South Charlotte Dermatology	NC	10370 Park Rd Charlotte, NC 28210	1.791759469228055	0.0	0.0	0	2	0	1	0	0	0.0	0.0	0.0	0.0	0.0	0.0	0.0	0.0	0.0	0.0	0.0	0.0	0.0	0.0	0.0	0.0	0.0	0.0	0.0	0.0	0.0	0.0	0.0	0.0	0.0	0.0	0.0	0	0	0	0	0
Pittsburgh	4.579035417869238	24.18845491408192	38.854034841266	40.453821999999995	-79.948768	Vocelli Pizza	PA	4740 Baum Blvd Bloomfield Pittsburgh, PA 15213	1.791759469228055	0.6931471805599453	0.0	0	2	0	1	0	0	1.0	0.0	0.0	0.0	0.0	0.0	0.0	1.0	1.0	0.0	0.0	0.0	0.0	0.0	1.0	0.0	0.0	0.0	0.0	0.0	0.0	0.0	0.0	0.0	0.0	0.0	0.0	1	0	0	0	1
Las Vegas	1.3980489245863883	8.395276701546175	5.818289836871543	36.165004499999995	-115.1509219	Icehouse Lounge	NV	650 S Main St Downtown Las Vegas, NV 89101	0.0	0.6931471805599453	0.0	0	2	0	1	0	0	0.0	0.0	0.0	0.0	0.0	0.0	0.0	0.0	1.0	0.0	0.0	0.0	0.0	0.0	0.0	0.0	0.0	0.0	0.0	0.0	0.0	0.0	0.0	0.0	0.0	0.0	0.0	0	0	0	1	0
Las Vegas	8.83216064572331	9.053127524058665	5.38395904004549	36.134739796384395	-115.22526728177401	Award Realty Corp	NV	3015 S Jones Blvd Westside Las Vegas, NV 89146	2.3978952727983707	0.0	0.0	0	2	0	1	0	0	0.0	0.0	0.0	0.0	0.0	0.0	0.0	0.0	1.0	0.0	0.0	0.0	0.0	0.0	0.0	0.0	0.0	0.0	0.0	0.0	0.0	0.0	0.0	0.0	0.0	0.0	0.0	0	0	0	0	0
Charlotte	19.422963582916648	23.213511221678	19.061541002211488	35.3184247	-80.66242690000001	Souper Salad	NC	5117 S Blvd Charlotte, NC 28217	0.0	1.0986122886681098	0.0	0	2	0	1	0	0	0.0	0.0	0.0	0.0	0.0	0.0	0.0	1.0	1.0	0.0	0.0	0.0	0.0	0.0	1.0	0.0	0.0	0.0	0.0	0.0	0.0	0.0	0.0	0.0	0.0	0.0	0.0	1	0	0	0	0
Las Vegas	14.02829886251966	12.801509111525064	9.785466582470246	36.1179963	-115.2792308	Dental Designs of Las Vegas	NV	3975 Durango Dr Ste 102 Spring Valley Las Vegas, NV 89147	1.9459101490553132	0.6931471805599453	0.0	0	2	0	1	0	0	0.0	0.0	0.0	0.0	0.0	0.0	0.0	0.0	0.0	0.0	0.0	0.0	0.0	0.0	0.0	0.0	0.0	0.0	0.0	0.0	0.0	0.0	0.0	0.0	0.0	0.0	0.0	0	0	0	0	0
Las Vegas	16.734893626216977	12.546494293547445	10.902712936223185	36.070873999999996	-115.27873400000001	Terrible Herbst	NV	6480 S Durango Drive Spring Valley Las Vegas, NV 89113	4.564348191467836	1.3862943611198906	0.0	0	2	0	1	0	0	0.0	0.0	0.0	0.0	0.0	0.0	0.0	0.0	0.0	0.0	0.0	0.0	0.0	0.0	0.0	0.0	0.0	0.0	0.0	0.0	0.0	0.0	0.0	0.0	0.0	0.0	0.0	0	0	0	0	0
Charlotte	3.6307304192383687	29.229198293570175	5.22582919174218	35.201759	-80.871844	The Spoke Easy	NC	2923 S Tryon St Ste 250 Charlotte, NC 28203	0.0	0.0	0.0	0	2	0	1	0	0	0.0	0.0	0.0	0.0	0.0	0.0	0.0	0.0	1.0	0.0	0.0	0.0	0.0	0.0	0.0	0.0	0.0	0.0	0.0	0.0	0.0	0.0	0.0	0.0	0.0	0.0	0.0	0	0	0	0	0
Phoenix	7.01814466874181	6.6316805914038905	4.69536219612617	33.4961609381455	-112.02077599365101	Keep It Cut	AZ	2824 E Indian School Rd Ste 3 Phoenix, AZ 85016	5.10594547390058	1.0986122886681098	0.0	0	2	0	1	0	0	0.0	0.0	0.0	0.0	0.0	0.0	0.0	0.0	1.0	0.0	0.0	0.0	0.0	0.0	0.0	0.0	0.0	0.0	1.0	0.0	0.0	0.0	0.0	0.0	0.0	0.0	0.0	0	0	0	0	0
Madison	1.241596727261756	7.790583736790966	2.065767532148852	43.0785923	-89.3783104	Blair Street Brew & BBQ	WI	605 E Washington Ave Williamson - Marquette Madison, WI 53703	2.772588722239781	1.6094379124341003	0.0	0	1	0	1	1	0	1.0	1.0	0.0	1.0	1.0	1.0	1.0	1.0	1.0	0.0	0.0	0.0	0.0	0.0	1.0	0.0	0.0	0.0	1.0	0.0	0.0	0.0	0.0	0.0	0.0	0.0	0.0	1	0	0	0	0
Phoenix	21.053835987219603	23.999629615260922	18.528393930200732	33.640640999999995	-112.09630200000001	Stan's European Deli	AZ	Deer Valley Plaza Shopping Center 1712 W Bell Rd Phoenix, AZ 85023	3.1780538303479458	1.6094379124341003	0.0	2	2	0	1	0	0	0.0	0.0	0.0	0.0	0.0	1.0	0.0	0.0	1.0	0.0	0.0	0.0	0.0	0.0	1.0	0.0	0.0	0.0	1.0	0.0	0.0	0.0	0.0	0.0	0.0	0.0	0.0	1	0	0	0	0
Las Vegas	8.614200677377946	6.1153539219403825	2.9660854586379544	36.112279	-115.2033665	High Class Studios	NV	4270 Cameron St Las Vegas, NV 89103	0.0	0.6931471805599453	0.0	0	2	0	1	0	0	0.0	0.0	0.0	0.0	0.0	0.0	0.0	0.0	1.0	0.0	0.0	0.0	0.0	0.0	0.0	0.0	0.0	0.0	0.0	0.0	0.0	0.0	0.0	0.0	0.0	0.0	0.0	0	0	0	0	0
Las Vegas	18.814095097429764	20.3062730581025	16.77495894673011	36.1690435663802	-115.34469690080299	Boot Camp Las Vegas	NV	11311 Alta Dr Summerlin Las Vegas, NV 89124	3.091042453358316	1.0986122886681098	0.0	0	2	0	1	0	0	0.0	0.0	0.0	0.0	0.0	0.0	0.0	0.0	0.0	0.0	0.0	0.0	0.0	0.0	0.0	0.0	0.0	0.0	0.0	0.0	0.0	0.0	0.0	0.0	0.0	0.0	0.0	0	0	0	0	0
Las Vegas	2.779316307046662	6.607314103688379	3.905210100793636	36.148132946459796	-115.15577316284201	Fellini's Ristorante	NV	Stratosphere Las Vegas Hotel & Casino 2000 Las Vegas Blvd S The Strip Las Vegas, NV 89104	5.030437921392435	2.3978952727983707	0.0	0	1	0	1	1	0	0.0	0.0	0.0	1.0	1.0	1.0	1.0	1.0	1.0	1.0	0.0	0.0	0.0	0.0	1.0	0.0	0.0	1.0	0.0	1.0	0.0	0.0	0.0	0.0	0.0	0.0	0.0	1	0	0	0	0
Phoenix	18.88758463107309	25.282752993984634	19.055887350543117	33.507577000000005	-112.26646299999999	Dream Nails	AZ	9611 W Camelback Rd Phoenix, AZ 85037	3.044522437723423	1.3862943611198906	0.0	0	2	0	1	1	0	0.0	0.0	0.0	0.0	0.0	0.0	0.0	0.0	1.0	0.0	0.0	0.0	0.0	0.0	0.0	0.0	0.0	0.0	1.0	0.0	0.0	0.0	0.0	0.0	0.0	0.0	0.0	0	0	0	0	0
Las Vegas	4.176341852180079	4.486883045770841	3.7805422302410414	36.1295416	-115.13258970000001	Pigeons Be Gone - Pigeon Pest Control	NV	Eastside Las Vegas, NV 89169	0.0	0.0	0.0	0	2	0	1	0	0	0.0	0.0	0.0	0.0	0.0	0.0	0.0	0.0	0.0	0.0	0.0	0.0	0.0	0.0	0.0	0.0	0.0	0.0	0.0	0.0	0.0	0.0	0.0	0.0	0.0	0.0	0.0	0	0	0	0	0
Las Vegas	13.656270838984808	12.087225198484976	9.159859829313278	36.1137386	-115.27232659999999	Cimarron Apartments	NV	8301 West Flamingo Road Spring Valley Las Vegas, NV 89147	2.0794415416798357	1.0986122886681098	0.0	0	2	0	1	0	0	0.0	0.0	0.0	0.0	0.0	0.0	0.0	0.0	1.0	0.0	0.0	0.0	0.0	0.0	0.0	0.0	0.0	0.0	0.0	0.0	0.0	0.0	0.0	0.0	0.0	0.0	0.0	0	0	0	0	0
Madison	0.5243576102245798	8.397302138324024	1.3764043476457017	43.075216	-89.386276	The Cooper's Tavern	WI	20 W Mifflin St Capitol Madison, WI 53703	6.576469569048224	3.9512437185814275	0.6931471805599453	0	1	0	0	1	0	0.0	1.0	0.0	1.0	1.0	0.0	1.0	0.0	1.0	0.0	1.0	0.0	0.0	0.0	1.0	0.0	1.0	0.0	0.0	0.0	0.0	0.0	0.0	0.0	0.0	0.0	0.0	1	0	0	1	0
Las Vegas	12.096954385166827	16.22722786822031	12.379033824426152	36.196007	-115.265262	Geekbusters Computer Services	NV	1900 Mountain Hills Ct Unit 202 Summerlin Las Vegas, NV 89128	0.0	0.0	0.0	0	2	0	1	0	0	0.0	0.0	0.0	0.0	0.0	0.0	0.0	0.0	0.0	0.0	0.0	0.0	0.0	0.0	0.0	0.0	0.0	0.0	0.0	0.0	0.0	0.0	0.0	0.0	0.0	0.0	0.0	0	0	0	0	0
Pittsburgh	6.930641662961194	24.803845266820726	35.754921767613205	40.437713	-79.918888	FedEx Office Print & Ship Center	PA	6308 Forbes Ave Squirrel Hill Pittsburgh, PA 15217	4.060443010546419	1.0986122886681098	0.0	0	2	0	1	0	0	0.0	0.0	0.0	0.0	0.0	0.0	0.0	0.0	1.0	0.0	0.0	0.0	0.0	0.0	0.0	0.0	0.0	0.0	0.0	0.0	0.0	0.0	0.0	0.0	0.0	0.0	0.0	0	0	0	0	0
Las Vegas	2.328666507452406	6.27150912943885	4.603523060673056	36.1461334	-115.1367176	Bentto Rock 1	NV	2201 S Maryland Pkwy Downtown Las Vegas, NV 89104	2.3978952727983707	1.3862943611198906	0.0	2	2	0	1	0	0	0.0	0.0	0.0	1.0	0.0	0.0	1.0	1.0	1.0	0.0	0.0	0.0	0.0	0.0	1.0	0.0	0.0	0.0	0.0	0.0	0.0	0.0	0.0	0.0	0.0	0.0	0.0	1	0	0	0	0
Las Vegas	9.927135441417565	10.837396056984879	7.153107310518884	36.1433968	-115.2419755	Curl Up N Dye	NV	2550 S Rainbow Blvd Ste E-17 Westside Las Vegas, NV 89146	4.68213122712422	2.6390573296152584	0.0	0	2	0	1	1	0	0.0	0.0	0.0	0.0	0.0	0.0	0.0	0.0	1.0	0.0	0.0	0.0	0.0	0.0	0.0	0.0	0.0	0.0	1.0	0.0	0.0	0.0	0.0	0.0	0.0	0.0	0.0	0	0	0	0	0
Las Vegas	7.208945388328277	6.46281784686665	2.7152093474532286	36.125964	-115.1976	Tea Station	NV	4355 Spring Mountain Rd Ste 106 Chinatown Las Vegas, NV 89102	8.453401058328458	5.739792912179234	1.3862943611198906	0	2	0	0	0	0	0.0	1.0	0.0	1.0	0.0	0.0	1.0	1.0	1.0	0.0	0.0	0.0	0.0	0.0	1.0	0.0	0.0	0.0	1.0	0.0	0.0	0.0	0.0	0.0	0.0	0.0	0.0	1	0	0	0	0
Phoenix	1.7000195184389648	7.6009545834939285	1.9489447968605094	33.465610999999996	-112.082178	Jersey Mike's Subs	AZ	1515 N. 7th Avenue Ste 140 Phoenix, AZ 85003	5.517452896464707	2.772588722239781	0.0	0	2	0	1	0	0	0.0	1.0	0.0	1.0	1.0	1.0	0.0	1.0	1.0	0.0	0.0	0.0	0.0	0.0	1.0	0.0	0.0	0.0	1.0	0.0	0.0	0.0	0.0	0.0	0.0	0.0	0.0	1	1	1	0	0
Las Vegas	2.0289561139793815	8.205559776561453	5.3998694758702355	36.16253629999999	-115.15743640000001	Kenneth Cole Outlet	NV	855 Grand Central Parkway Downtown Las Vegas, NV 89106	3.9512437185814275	1.0986122886681098	0.0	0	2	0	1	1	0	0.0	0.0	0.0	0.0	0.0	0.0	0.0	0.0	1.0	0.0	0.0	0.0	0.0	0.0	0.0	0.0	0.0	0.0	0.0	1.0	0.0	0.0	0.0	0.0	0.0	0.0	0.0	0	0	0	0	0
Las Vegas	9.337120665520166	6.726863395412208	3.751587956089577	36.11	-115.2118	Sears Carpet Cleaning and Air Duct Cleaning	NV	Las Vegas, NV 89002	0.0	0.6931471805599453	0.0	0	2	0	1	0	0	0.0	0.0	0.0	0.0	0.0	0.0	0.0	0.0	1.0	0.0	0.0	0.0	0.0	0.0	0.0	0.0	0.0	0.0	0.0	0.0	0.0	0.0	0.0	0.0	0.0	0.0	0.0	0	0	0	0	0
Phoenix	17.338042945028985	23.11743036125275	19.0480436118129	33.4094664756205	-112.254004243781	Moving Forward	AZ	Phoenix, AZ 85353	1.3862943611198906	1.0986122886681098	0.0	0	2	0	1	0	0	0.0	0.0	0.0	0.0	0.0	0.0	0.0	0.0	1.0	0.0	0.0	0.0	0.0	0.0	0.0	0.0	0.0	0.0	0.0	0.0	0.0	0.0	0.0	0.0	0.0	0.0	0.0	0	0	0	0	0
Phoenix	6.05357230337549	12.396198947975059	7.347359963639115	33.4537437	-112.13956540000001	Nature's Garden Delivered	AZ	501 N 37th Dr Ste 103 Phoenix, AZ 85009	0.0	1.6094379124341003	0.0	0	2	0	1	1	0	0.0	0.0	0.0	0.0	0.0	0.0	0.0	0.0	1.0	0.0	0.0	0.0	0.0	0.0	0.0	0.0	0.0	0.0	1.0	0.0	0.0	0.0	0.0	0.0	0.0	0.0	0.0	0	0	0	0	0
Las Vegas	10.232697588043525	6.586186966987056	4.208904506985431	36.0998972	-115.21344909999999	WorldMark Las Vegas - Tropicana Avenue	NV	5275 W Tropicana Ave Las Vegas, NV 89103	5.575949103146316	2.8903717578961645	0.6931471805599453	0	2	0	2	1	0	0.0	0.0	0.0	0.0	0.0	0.0	0.0	0.0	1.0	0.0	0.0	0.0	0.0	0.0	0.0	0.0	0.0	0.0	0.0	0.0	0.0	0.0	0.0	0.0	0.0	0.0	0.0	0	0	0	0	0
Las Vegas	19.227358382436595	25.721501652629136	21.97809403367183	36.288899	-115.28771780000001	Patty's Closet	NV	7010 N Durango Dr Centennial Las Vegas, NV 89149	3.9318256327243257	1.791759469228055	0.0	0	2	0	1	1	0	0.0	0.0	0.0	0.0	0.0	0.0	0.0	0.0	1.0	0.0	0.0	0.0	0.0	0.0	0.0	0.0	0.0	0.0	0.0	0.0	0.0	0.0	0.0	0.0	0.0	0.0	0.0	0	0	0	0	0
Las Vegas	1.4025739070751368	9.858900966499274	7.5016250935798015	36.178588899999994	-115.14210039999999	Carlson Electric Motor Service	NV	709 N Main St Las Vegas, NV 89101	0.0	0.0	0.0	0	2	0	1	0	0	0.0	0.0	0.0	0.0	0.0	0.0	0.0	0.0	1.0	0.0	0.0	0.0	0.0	0.0	0.0	0.0	0.0	0.0	0.0	0.0	0.0	0.0	0.0	0.0	0.0	0.0	0.0	0	0	0	0	0
Phoenix	9.183070516034615	11.034757078727736	6.385248713784137	33.531240999999994	-112.047069	Dyna-Tronics	AZ	1610 E Maryland Ave Phoenix, AZ 85016	0.0	0.0	0.0	0	2	0	1	0	0	0.0	0.0	0.0	0.0	0.0	0.0	0.0	0.0	1.0	0.0	0.0	0.0	0.0	0.0	0.0	0.0	0.0	0.0	0.0	0.0	0.0	0.0	0.0	0.0	0.0	0.0	0.0	0	0	0	0	0
Phoenix	9.9796850061705	8.462817248228045	7.638145638070643	33.513051000000004	-111.99595500000001	Lori H Travis MD	AZ	5090 N 40th St Ste 250 Phoenix, AZ 85018	0.0	0.0	0.0	0	2	0	1	0	0	0.0	0.0	0.0	0.0	0.0	0.0	0.0	0.0	0.0	0.0	0.0	0.0	0.0	0.0	0.0	0.0	0.0	0.0	0.0	0.0	0.0	0.0	0.0	0.0	0.0	0.0	0.0	0	0	0	0	0
Charlotte	6.757234117655594	28.687726028152753	6.563023848234914	35.1684737768456	-80.87525749201909	Jasmine Grill	NC	5033 South Blvd Ste G Charlotte, NC 28217	5.69035945432406	3.044522437723423	0.0	2	2	0	0	0	0	1.0	1.0	0.0	1.0	1.0	1.0	1.0	1.0	1.0	1.0	0.0	0.0	0.0	0.0	1.0	0.0	0.0	0.0	1.0	0.0	0.0	0.0	0.0	0.0	0.0	0.0	0.0	1	0	0	0	0
Charlotte	1.4652924519612325	28.139614471119927	3.9275525612408506	35.2146169	-80.853913	Cachet Nail Boutique	NC	1437 South Blvd Ste B South End Charlotte, NC 28203	4.02535169073515	2.302585092994046	0.0	0	2	0	1	1	0	0.0	0.0	0.0	0.0	0.0	0.0	0.0	0.0	1.0	0.0	0.0	0.0	0.0	0.0	0.0	0.0	0.0	0.0	1.0	0.0	0.0	0.0	0.0	0.0	0.0	0.0	0.0	0	0	0	0	0
Las Vegas	6.0385569308203415	9.99059670814814	10.294208375718364	36.158249936235	-115.069382019507	Thrifty Ice Cream	NV	4825 E Charleston Blvd Sunrise Las Vegas, NV 89104	3.332204510175204	1.791759469228055	0.0	0	2	0	1	0	0	0.0	0.0	0.0	0.0	0.0	0.0	0.0	1.0	1.0	0.0	0.0	0.0	0.0	0.0	0.0	0.0	1.0	0.0	0.0	0.0	0.0	0.0	0.0	0.0	0.0	0.0	0.0	0	0	0	0	0
Charlotte	0.5452906846792882	27.731488805721035	3.945425344607425	35.2271920689991	-80.84278337724609	Tiger Yakitori	NC	First Ward Charlotte, NC	1.9459101490553132	0.0	0.0	0	2	0	1	0	0	0.0	0.0	0.0	1.0	0.0	0.0	0.0	1.0	1.0	0.0	0.0	0.0	0.0	0.0	1.0	0.0	0.0	0.0	0.0	0.0	0.0	0.0	0.0	0.0	0.0	0.0	0.0	1	0	0	0	0
Charlotte	2.5811029788477313	24.928227657115713	2.2279625408247874	35.220291700000004	-80.8127772	Hong Kong Vintage	NC	1514 Central Ave Plaza Midwood Charlotte, NC 28205	4.356708826689592	1.3862943611198906	0.0	0	2	0	1	1	0	0.0	0.0	0.0	0.0	0.0	0.0	0.0	0.0	1.0	0.0	0.0	0.0	0.0	0.0	0.0	0.0	1.0	0.0	0.0	0.0	0.0	0.0	0.0	0.0	0.0	0.0	0.0	0	0	0	0	0
Charlotte	14.650314294276152	36.589603907775476	17.44646851499553	35.3541066	-80.85417530000001	Dillard's - Northlake Mall	NC	7535 Northlake Mall Charlotte, NC 28216	3.4965075614664802	1.3862943611198906	0.0	0	2	0	1	1	0	0.0	0.0	0.0	0.0	0.0	0.0	0.0	0.0	1.0	0.0	0.0	0.0	0.0	0.0	0.0	0.0	0.0	0.0	1.0	0.0	0.0	0.0	0.0	0.0	0.0	0.0	0.0	0	0	0	0	0
Phoenix	15.244472667650088	19.498348171428965	13.121872946338161	33.5818404	-112.127279	Starbucks	AZ	3135 W Peoria Ave Phoenix, AZ 85029	5.560681631015528	1.791759469228055	0.0	0	2	0	0	0	0	0.0	1.0	0.0	0.0	0.0	0.0	0.0	0.0	1.0	0.0	0.0	0.0	0.0	0.0	0.0	0.0	0.0	0.0	0.0	0.0	0.0	0.0	0.0	0.0	0.0	0.0	0.0	0	0	0	0	0
Las Vegas	8.614037566243557	0.30447333769647406	4.080500584018647	36.089494	-115.138026	Abercrombie & Fitch	NV	6623 Las Vegas Blvd S Southeast Las Vegas, NV 89119	3.784189633918261	1.3862943611198906	0.0	0	2	0	1	2	0	0.0	0.0	0.0	0.0	0.0	0.0	0.0	0.0	1.0	0.0	0.0	0.0	0.0	0.0	0.0	0.0	0.0	0.0	0.0	1.0	0.0	0.0	0.0	0.0	0.0	0.0	0.0	0	0	0	0	0
Las Vegas	1.7234115645507244	10.314968786692457	8.226336507986925	36.182415	-115.1324125	Secretary of State	NV	555 E Washington Ave Ste 5200 Las Vegas, NV 89101	4.2626798770413155	1.6094379124341003	0.0	0	2	0	1	0	0	0.0	0.0	0.0	0.0	0.0	0.0	0.0	0.0	0.0	0.0	0.0	0.0	0.0	0.0	0.0	0.0	0.0	0.0	0.0	0.0	0.0	0.0	0.0	0.0	0.0	0.0	0.0	0	0	0	0	0
Las Vegas	10.613238010340009	2.04043923333393	5.247917963247901	36.071884999999995	-115.14680700000001	Preferred Homecare	NV	871 Grier Dr Ste C & B2 Southeast Las Vegas, NV 89119	2.3978952727983707	1.0986122886681098	0.0	0	2	0	1	0	0	0.0	0.0	0.0	0.0	0.0	0.0	0.0	0.0	0.0	0.0	0.0	0.0	0.0	0.0	0.0	0.0	0.0	0.0	0.0	0.0	0.0	0.0	0.0	0.0	0.0	0.0	0.0	0	0	0	0	0
Charlotte	5.676804569786702	21.78548869781944	2.454492636511886	35.195245	-80.788236	Sonny's Real Pit Bar-B-Q	NC	4301 Monroe Rd Cotswold Charlotte, NC 28205	0.0	0.6931471805599453	0.0	0	2	0	1	1	0	0.0	0.0	0.0	1.0	0.0	0.0	1.0	1.0	1.0	0.0	0.0	0.0	0.0	0.0	1.0	0.0	0.0	0.0	0.0	0.0	0.0	0.0	0.0	0.0	0.0	0.0	0.0	1	0	0	0	0
Charlotte	12.278117193893161	26.000455793652392	12.925579584883657	35.303872	-80.749548	Qdoba Mexican Grill	NC	230 E Wt Harris Blvd University City Charlotte, NC 28262	4.787491742782046	2.6390573296152584	0.6931471805599453	0	2	0	1	0	0	0.0	1.0	0.0	1.0	1.0	1.0	0.0	1.0	1.0	0.0	0.0	0.0	0.0	0.0	1.0	0.0	0.0	0.0	1.0	0.0	0.0	0.0	0.0	0.0	0.0	0.0	0.0	1	0	1	0	0
Las Vegas	13.492403773456141	15.02518824583646	11.383833767926996	36.158503	-115.285177	Bonefish Grill	NV	8701 W Charleston Bvd Westside Las Vegas, NV 89117	5.327876168789581	2.6390573296152584	0.0	0	1	0	1	1	0	0.0	1.0	0.0	1.0	1.0	1.0	1.0	1.0	1.0	1.0	0.0	0.0	0.0	0.0	1.0	0.0	0.0	0.0	1.0	0.0	0.0	0.0	0.0	0.0	0.0	0.0	0.0	1	0	0	0	0
Las Vegas	12.445701500568477	17.785090901399347	13.97221199764567	36.2189900672113	-115.258273814554	Sasa Sushi	NV	7450 W Cheyenne Ave Ste 118 Northwest Las Vegas, NV 89129	6.9985096422506015	4.465908118654584	1.0986122886681098	0	0	0	1	1	0	0.0	0.0	0.0	1.0	1.0	0.0	1.0	1.0	1.0	1.0	0.0	0.0	0.0	0.0	1.0	0.0	0.0	0.0	1.0	0.0	0.0	0.0	0.0	0.0	0.0	0.0	0.0	1	0	0	0	0
Phoenix	9.638186276259617	14.998748366928583	8.191849020469766	33.5245223	-112.1310882	Starbucks	AZ	3320 W Bethany Home Rd Ste 100 Phoenix, AZ 85017	6.405228458030842	3.6375861597263857	1.0986122886681098	0	2	0	0	1	0	0.0	1.0	0.0	0.0	0.0	0.0	0.0	0.0	1.0	0.0	0.0	0.0	0.0	0.0	0.0	0.0	0.0	0.0	1.0	0.0	0.0	0.0	0.0	0.0	0.0	0.0	0.0	0	0	0	0	0
Madison	9.467958726049732	3.4147415351007706	10.133198627457078	43.130005	-89.303977	Applebee's	WI	4710 E Towne Blvd Madison, WI 53704	3.7612001156935624	1.0986122886681098	0.0	0	1	0	0	1	0	0.0	0.0	0.0	1.0	1.0	0.0	1.0	1.0	1.0	0.0	1.0	0.0	0.0	0.0	1.0	0.0	0.0	0.0	1.0	0.0	0.0	0.0	0.0	0.0	0.0	1.0	0.0	1	0	0	1	0
Las Vegas	5.8705905050865725	2.733354294497018	2.9223707268630883	36.1142342	-115.138158	University Sinclair	NV	1175 E Flamingo Rd Eastside Las Vegas, NV 89119	1.9459101490553132	0.0	0.0	0	2	0	1	0	0	0.0	0.0	0.0	0.0	0.0	0.0	0.0	0.0	0.0	0.0	0.0	0.0	0.0	0.0	0.0	0.0	0.0	0.0	0.0	0.0	0.0	0.0	0.0	0.0	0.0	0.0	0.0	0	0	0	0	0
Phoenix	20.02219640441828	21.299939805138326	17.243379891241826	33.6284549	-112.0307028	C Landscaping & Irrigation	AZ	15621 N Cave Creek Rd Phoenix, AZ 85032	0.0	0.0	0.0	0	2	0	1	0	0	0.0	0.0	0.0	0.0	0.0	0.0	0.0	0.0	1.0	0.0	0.0	0.0	0.0	0.0	0.0	0.0	0.0	0.0	0.0	0.0	0.0	0.0	0.0	0.0	0.0	0.0	0.0	0	0	0	0	0
Phoenix	18.520403382305044	22.589291815088416	16.34331841040473	33.610704839229605	-112.13538184762	Alida Restaurant Supply	AZ	3535 W Thunderbird Rd Phoenix, AZ 85029	2.302585092994046	0.6931471805599453	0.0	0	2	0	1	1	0	0.0	0.0	0.0	0.0	0.0	0.0	0.0	0.0	1.0	0.0	0.0	0.0	0.0	0.0	0.0	0.0	0.0	0.0	1.0	0.0	0.0	0.0	0.0	0.0	0.0	0.0	0.0	0	0	0	0	0
Phoenix	10.015606774774573	3.8834590429449034	9.702277052206417	33.445444	-111.96703799999999	Berry Bros Firewood	AZ	5317 E Washington St Phoenix, AZ 85034	2.772588722239781	0.6931471805599453	0.0	0	2	0	1	0	0	0.0	0.0	0.0	0.0	0.0	0.0	0.0	0.0	0.0	0.0	0.0	0.0	0.0	0.0	0.0	0.0	0.0	0.0	0.0	0.0	0.0	0.0	0.0	0.0	0.0	0.0	0.0	0	0	0	0	0
Madison	0.6693289014607742	9.290758245893386	1.021843393665556	43.068915000000004	-89.393644	U-Haul Moving & Storage at Downtown Campus	WI	602 W Washington Ave Capitol Madison, WI 53703	1.9459101490553132	0.0	0.0	0	2	0	1	0	0	0.0	0.0	0.0	0.0	0.0	0.0	0.0	0.0	1.0	0.0	0.0	0.0	0.0	0.0	0.0	0.0	0.0	0.0	0.0	0.0	0.0	0.0	0.0	0.0	0.0	0.0	0.0	0	0	0	0	0
Las Vegas	7.953546704938922	5.609927734028901	2.259027656197298	36.114539	-115.19568400000001	Blue Agave	NV	4321 W Flamingo Rd Las Vegas, NV 89103	1.3862943611198906	0.6931471805599453	0.0	0	1	0	1	1	0	0.0	0.0	0.0	0.0	0.0	0.0	1.0	0.0	1.0	0.0	0.0	0.0	0.0	0.0	1.0	0.0	0.0	0.0	0.0	0.0	0.0	0.0	0.0	0.0	0.0	0.0	0.0	1	0	0	0	0
Phoenix	13.228029102486833	7.599411787167336	12.302610501790868	33.465563800000005	-111.9331768	Lotus of Scottsdale	AZ	6855 E. McDowell Road Phoenix, AZ 85257	0.0	0.0	0.0	0	2	0	1	0	0	0.0	0.0	0.0	0.0	0.0	0.0	0.0	0.0	0.0	0.0	0.0	0.0	0.0	0.0	0.0	0.0	0.0	0.0	0.0	0.0	0.0	0.0	0.0	0.0	0.0	0.0	0.0	0	0	0	0	0
Las Vegas	6.9390194992237335	8.606919040934688	9.678732387214733	36.1384892	-115.06703429999999	Albertsons	NV	2835 S Nellis Blvd Sunrise Las Vegas, NV 89121	4.90527477843843	1.3862943611198906	0.0	0	2	0	1	1	0	0.0	0.0	0.0	0.0	0.0	0.0	0.0	0.0	1.0	0.0	0.0	0.0	0.0	0.0	0.0	0.0	0.0	0.0	1.0	0.0	0.0	0.0	0.0	0.0	0.0	0.0	0.0	0	0	0	0	0
Phoenix	20.04607355114613	19.657019164440204	17.281639567274908	33.6126584	-111.9763423	Pro Misting System Services	AZ	13835 N Tatum Blvd Ste 9-115 Phoenix, AZ 85032	0.0	0.0	0.0	0	2	0	1	0	0	0.0	0.0	0.0	0.0	0.0	0.0	0.0	0.0	1.0	0.0	0.0	0.0	0.0	0.0	0.0	0.0	0.0	0.0	0.0	0.0	0.0	0.0	0.0	0.0	0.0	0.0	0.0	0	0	0	0	0
Las Vegas	6.454934597332823	4.503402808407196	0.6570082279043679	36.1190372	-115.176005	BOA Steakhouse	NV	The Forum Shops At Caesars 3500 Las Vegas Blvd S The Strip Las Vegas, NV 89136	4.820281565605037	3.1780538303479458	0.0	0	1	1	1	3	0	0.0	1.0	0.0	1.0	0.0	0.0	1.0	0.0	1.0	1.0	0.0	0.0	0.0	0.0	1.0	0.0	0.0	1.0	0.0	1.0	0.0	0.0	0.0	0.0	0.0	0.0	0.0	1	0	0	0	0
Charlotte	0.6629466682403449	28.036930715201393	4.065547510373549	35.224676	-80.847782	Knight Theater	NC	430 S Tryon St Uptown Charlotte, NC 28202	4.941642422609304	1.791759469228055	0.0	0	0	0	1	1	0	0.0	0.0	0.0	1.0	0.0	0.0	0.0	1.0	1.0	0.0	0.0	0.0	0.0	0.0	0.0	1.0	0.0	0.0	0.0	1.0	0.0	0.0	0.0	0.0	0.0	0.0	0.0	0	0	0	1	0
Phoenix	8.072524879875214	2.7243743283277246	7.518857111770575	33.455418	-111.98778600000001	Healthy Chinese Herbs	AZ	668 N 44th St Phoenix, AZ 85008	3.713572066704308	2.3978952727983707	0.0	0	2	0	1	1	0	0.0	0.0	0.0	0.0	0.0	0.0	0.0	0.0	1.0	0.0	0.0	0.0	0.0	0.0	0.0	0.0	0.0	0.0	1.0	0.0	0.0	0.0	0.0	0.0	0.0	0.0	0.0	0	0	0	0	0
Las Vegas	12.93823124226997	9.168386433125441	7.1127966222034145	36.0897888	-115.2431945	Silk Skin Laser Spa	NV	5463 S Rainbow Blvd Ste B1 Spring Valley Las Vegas, NV 89118	2.4849066497880004	0.0	0.0	0	2	0	1	1	0	0.0	0.0	0.0	0.0	0.0	0.0	0.0	0.0	1.0	0.0	0.0	0.0	0.0	0.0	0.0	0.0	0.0	0.0	1.0	0.0	0.0	0.0	0.0	0.0	0.0	0.0	0.0	0	0	0	0	0
Charlotte	12.27692215824244	21.358002429190854	9.305854537073566	35.1173473	-80.7990185	NC Moving Labor, Inc	NC	Charlotte, NC 28226	0.0	0.0	0.0	0	2	0	1	0	0	0.0	0.0	0.0	0.0	0.0	0.0	0.0	0.0	0.0	0.0	0.0	0.0	0.0	0.0	0.0	0.0	0.0	0.0	0.0	0.0	0.0	0.0	0.0	0.0	0.0	0.0	0.0	0	0	0	0	0
Phoenix	21.82716202960884	23.860755015038333	19.13184482107189	33.648091799999996	-112.0594986	Mountain View Community Center	AZ	1104 E Grovers Avenue Phoenix, AZ 85022	3.4011973816621555	1.0986122886681098	0.0	0	2	0	1	0	0	0.0	0.0	0.0	0.0	0.0	0.0	0.0	0.0	0.0	0.0	0.0	0.0	0.0	0.0	0.0	0.0	0.0	0.0	0.0	0.0	0.0	0.0	0.0	0.0	0.0	0.0	0.0	0	0	0	0	0
Charlotte	5.398253347126669	30.013009647881347	8.262340686637538	35.271145000000004	-80.842316	Victory Lane Indoor Karting Center	NC	2330 Tipton Dr Ste 100 North Charlotte Charlotte, NC 28206	4.007333185232471	2.302585092994046	0.0	0	2	0	1	0	0	0.0	0.0	0.0	0.0	0.0	0.0	0.0	1.0	1.0	0.0	0.0	0.0	0.0	0.0	0.0	0.0	0.0	0.0	0.0	0.0	0.0	0.0	0.0	0.0	0.0	0.0	0.0	0	0	0	0	0
Pittsburgh	1.7787904649668071	20.0401938624392	40.31698578919543	40.429682	-79.986689	WYEP 91.3	PA	67 Bedford Sq South Side Pittsburgh, PA 15203	2.995732273553991	1.6094379124341003	0.0	0	2	0	1	0	0	0.0	0.0	0.0	0.0	0.0	0.0	0.0	1.0	0.0	0.0	0.0	0.0	0.0	0.0	0.0	0.0	0.0	0.0	0.0	0.0	0.0	0.0	0.0	0.0	0.0	0.0	0.0	0	0	0	0	0
Charlotte	18.639107444727546	35.01402169316091	20.570281301182945	35.384064	-80.784813	Eastfield Bar and Grill	NC	8709 Arbor Creek Dr Charlotte, NC 28269	5.017279836814924	2.302585092994046	0.6931471805599453	0	1	0	1	1	1	0.0	1.0	0.0	1.0	1.0	0.0	1.0	0.0	1.0	0.0	0.0	0.0	0.0	0.0	1.0	0.0	0.0	0.0	1.0	0.0	0.0	0.0	0.0	0.0	1.0	1.0	0.0	1	0	0	0	0
Edinburgh	2.4330243656313537	8.74395659478564	1.5588208258349097	55.9427912	-3.2224589	Haymarket Dental Care	EDH	3c Washington Lane Edinburgh Haymarket Edinburgh EH11 2HA	2.4849066497880004	1.0986122886681098	0.0	0	2	0	1	0	0	0.0	0.0	0.0	0.0	0.0	0.0	0.0	0.0	0.0	0.0	0.0	0.0	0.0	0.0	0.0	0.0	0.0	0.0	0.0	0.0	0.0	0.0	0.0	0.0	0.0	0.0	0.0	0	0	0	0	0
Phoenix	16.50416118434222	13.025421104082993	18.530907735104247	33.320892	-111.9899396	Labcorp	AZ	4350 E Ray Rd Ste 125 Phoenix, AZ 85044	1.6094379124341003	1.6094379124341003	0.0	0	2	0	1	0	0	0.0	0.0	0.0	0.0	0.0	0.0	0.0	0.0	0.0	0.0	0.0	0.0	0.0	0.0	0.0	0.0	0.0	0.0	0.0	0.0	0.0	0.0	0.0	0.0	0.0	0.0	0.0	0	0	0	0	0
Las Vegas	9.469839160170205	11.955418654348321	8.130522605133004	36.161363	-115.24061	Sundance Village Apts	NV	6500 W Charleston Blvd Westside Las Vegas, NV 89146	0.0	0.6931471805599453	0.0	0	2	0	1	0	0	0.0	0.0	0.0	0.0	0.0	0.0	0.0	0.0	0.0	0.0	0.0	0.0	0.0	0.0	0.0	0.0	0.0	0.0	0.0	0.0	0.0	0.0	0.0	0.0	0.0	0.0	0.0	0	0	0	0	0
Charlotte	11.988855233469602	33.72494527742563	12.441217074039141	35.146080100000006	-80.9340632	Regal Nails	NC	8180 S Tryon St Steele Creek Charlotte, NC 28273	2.772588722239781	1.3862943611198906	0.0	0	2	0	1	1	0	0.0	0.0	0.0	0.0	0.0	0.0	0.0	0.0	1.0	0.0	0.0	0.0	0.0	0.0	0.0	0.0	0.0	0.0	0.0	0.0	0.0	0.0	0.0	0.0	0.0	0.0	0.0	0	0	0	0	0
Las Vegas	5.593836967975791	5.1579695444729365	1.4469031778202768	36.127725299999994	-115.17441470000001	Mariposa	NV	Neiman Marcus 3200 Las Vegas Blvd S The Strip Las Vegas, NV 89109	0.0	0.0	0.0	0	2	0	1	2	0	0.0	1.0	0.0	0.0	0.0	0.0	1.0	1.0	1.0	1.0	0.0	0.0	0.0	1.0	0.0	0.0	0.0	0.0	0.0	0.0	0.0	0.0	0.0	0.0	0.0	0.0	0.0	1	0	0	0	0
Edinburgh	0.5666411471780052	10.118093557418465	0.51264947964089	55.9529502	-3.197322	Taco Mazama	EDH	City Centre 38 Hanover Street New Town Edinburgh EH2 2DR	2.70805020110221	1.0986122886681098	0.0	2	2	0	1	0	0	1.0	0.0	0.0	1.0	0.0	0.0	0.0	0.0	0.0	0.0	0.0	0.0	0.0	0.0	1.0	0.0	0.0	0.0	0.0	0.0	0.0	0.0	0.0	0.0	0.0	0.0	0.0	1	0	1	0	0
Pittsburgh	2.5685357004069633	20.424380123339347	39.44825646662167	40.427375	-79.976736	Walker's Pub	PA	2024 Sarah St South Side Pittsburgh, PA 15203	1.791759469228055	0.0	0.0	0	1	0	1	3	0	0.0	0.0	0.0	1.0	1.0	0.0	0.0	0.0	0.0	0.0	0.0	0.0	0.0	0.0	0.0	0.0	0.0	0.0	0.0	0.0	0.0	0.0	0.0	0.0	0.0	0.0	0.0	1	0	0	0	0
Las Vegas	14.327934064029977	12.819608140883176	9.906663596724675	36.1138469	-115.2806243	Blo Hair Salon	NV	8665 W Flamingo Rd Ste 129 Spring Valley Las Vegas, NV 89147	2.302585092994046	1.0986122886681098	0.0	0	2	0	1	0	0	0.0	0.0	0.0	0.0	0.0	0.0	0.0	0.0	0.0	0.0	0.0	0.0	0.0	0.0	0.0	0.0	0.0	0.0	0.0	0.0	0.0	0.0	0.0	0.0	0.0	0.0	0.0	0	0	0	0	0
Charlotte	18.355980983097172	24.018845084222708	15.740847284022388	35.058378999999995	-80.815484	Polished Nail Bar	NC	7864 Rea Rd Charlotte, NC 28277	4.499809670330265	2.302585092994046	0.0	0	2	0	1	1	0	0.0	0.0	0.0	0.0	0.0	0.0	0.0	0.0	1.0	0.0	0.0	0.0	0.0	0.0	0.0	0.0	1.0	0.0	0.0	0.0	0.0	0.0	0.0	0.0	0.0	0.0	0.0	0	0	0	0	0
Madison	0.35468906308854214	8.823285171819064	0.4991635244738201	43.075090100000004	-89.3970474	Walgreens	WI	676 State St Capitol Madison, WI 53703	3.5553480614894135	0.0	0.0	0	2	0	1	0	0	0.0	0.0	0.0	0.0	0.0	0.0	0.0	0.0	1.0	0.0	0.0	0.0	0.0	0.0	0.0	0.0	0.0	0.0	0.0	0.0	0.0	0.0	0.0	0.0	0.0	0.0	0.0	0	0	0	0	0
Edinburgh	4.1204068717295526	14.734019748579701	4.916053771707251	55.9580319	-3.1228555	The Prince Balti House	EDH	11-12 Seafield Road E Edinburgh EH15 1EB	0.0	0.0	0.0	0	2	0	1	0	0	0.0	0.0	0.0	0.0	0.0	0.0	0.0	0.0	0.0	0.0	0.0	0.0	0.0	0.0	0.0	0.0	0.0	0.0	0.0	0.0	0.0	0.0	0.0	0.0	0.0	0.0	0.0	1	0	0	0	0
Las Vegas	6.963804071791545	3.555557089835712	0.42996125278593056	36.1111846	-115.1707331	Panda Express	NV	3663 Las Vegas Blvd S Ste 530 The Strip Las Vegas, NV 89109	4.30406509320417	1.6094379124341003	0.0	0	2	0	1	0	0	0.0	1.0	0.0	1.0	0.0	0.0	0.0	1.0	1.0	0.0	0.0	0.0	0.0	0.0	1.0	0.0	0.0	0.0	0.0	0.0	0.0	0.0	0.0	0.0	0.0	0.0	0.0	1	0	0	0	0
Madison	7.085011609171271	9.329530007643111	7.925251094755253	43.0633408	-89.3071542	Wendy's	WI	2421 S Stoughton Rd Madison, WI 53716	2.1972245773362196	1.3862943611198906	0.0	0	2	0	1	0	0	0.0	0.0	0.0	0.0	0.0	0.0	0.0	0.0	1.0	0.0	0.0	0.0	0.0	0.0	1.0	0.0	0.0	0.0	0.0	0.0	0.0	0.0	0.0	0.0	0.0	0.0	0.0	1	0	1	0	0
Pittsburgh	7.415025415984784	26.412908537840767	36.64404409487545	40.456360100000005	-79.9150946	TechShop	PA	192 Bakery Sq Blvd Larimer Pittsburgh, PA 15206	5.123963979403259	0.6931471805599453	0.0	0	2	0	1	0	0	0.0	0.0	0.0	0.0	0.0	0.0	0.0	0.0	0.0	0.0	0.0	0.0	0.0	0.0	0.0	0.0	0.0	0.0	0.0	0.0	0.0	0.0	0.0	0.0	0.0	0.0	0.0	0	0	0	0	0
Madison	1.3577871806084505	7.9605987305931984	2.207000280602835	43.0763209	-89.376141	Lakeview Bakery and Deli	WI	524 E Wilson St Capitol Madison, WI 53703	3.6635616461296463	1.3862943611198906	0.0	0	2	0	0	0	0	0.0	1.0	0.0	1.0	0.0	1.0	0.0	1.0	1.0	0.0	0.0	0.0	0.0	0.0	1.0	0.0	0.0	0.0	0.0	0.0	0.0	0.0	0.0	0.0	0.0	0.0	0.0	1	0	0	0	0
Las Vegas	14.12940589543309	5.862228681879433	9.547459680595244	36.0406189	-115.1174397	Fantastic Sams	NV	8170 S Eastern Ave Ste 6 Southeast Las Vegas, NV 89123	1.6094379124341003	0.0	0.0	0	2	0	1	1	0	0.0	0.0	0.0	0.0	0.0	0.0	0.0	1.0	1.0	0.0	0.0	0.0	0.0	0.0	0.0	0.0	0.0	0.0	1.0	0.0	0.0	0.0	0.0	0.0	0.0	0.0	0.0	0	0	0	0	0
Las Vegas	8.37786623657778	3.240499015970157	1.8466385641441305	36.098909	-115.17555700000001	Auntie Anne's Pretzels	NV	3850 Las Vegas Blvd S Excalibur The Strip Las Vegas, NV 89109	2.4849066497880004	0.0	0.0	0	2	0	1	0	0	0.0	0.0	0.0	1.0	0.0	0.0	0.0	1.0	1.0	0.0	0.0	0.0	0.0	0.0	1.0	0.0	0.0	0.0	0.0	0.0	0.0	0.0	0.0	0.0	0.0	0.0	0.0	1	0	1	0	0
Las Vegas	5.918274080410098	4.340146169960712	0.7150270430508888	36.12145170000001	-115.16961119999999	Very Venice	NV	3355 Las Vegas Boulevard S The Strip Las Vegas, NV 89109	3.58351893845611	1.791759469228055	0.0	0	1	0	1	1	0	0.0	0.0	0.0	1.0	1.0	0.0	0.0	0.0	1.0	0.0	0.0	0.0	0.0	0.0	0.0	0.0	0.0	0.0	0.0	0.0	0.0	0.0	0.0	0.0	0.0	0.0	0.0	1	0	0	0	0
Phoenix	7.186521016149709	12.005577120109725	5.268199540041121	33.5127549	-112.10038759999999	Rapid Insurance of Arizona	AZ	5130 N 19th Ave Ste 3 Phoenix, AZ 85015	0.0	0.0	0.0	0	2	0	1	0	0	0.0	0.0	0.0	0.0	0.0	0.0	0.0	0.0	0.0	0.0	0.0	0.0	0.0	0.0	0.0	0.0	0.0	0.0	0.0	0.0	0.0	0.0	0.0	0.0	0.0	0.0	0.0	0	0	0	0	0
Las Vegas	7.280369776539065	3.5720136457153617	0.7112533679844627	36.108999	-115.173179	Beso Steakhouse	NV	3720 S Las Vegas Blvd Ste 260 The Strip Las Vegas, NV 89109	3.295836866004329	1.6094379124341003	0.0	0	1	1	1	3	0	0.0	1.0	0.0	1.0	0.0	0.0	1.0	0.0	1.0	1.0	0.0	0.0	0.0	0.0	0.0	0.0	0.0	1.0	0.0	0.0	0.0	0.0	0.0	0.0	0.0	0.0	0.0	1	0	0	0	0
Las Vegas	2.5604672600900993	9.43419420132861	8.351789654536814	36.1701652	-115.1073935	Iglesia Ni Cristo	NV	2929 Cedar Ave Las Vegas, NV 89101	6.398594934535208	4.59511985013459	0.0	0	2	0	1	0	0	0.0	0.0	0.0	0.0	0.0	0.0	0.0	0.0	0.0	0.0	0.0	0.0	0.0	0.0	0.0	0.0	0.0	0.0	0.0	0.0	0.0	0.0	0.0	0.0	0.0	0.0	0.0	0	0	0	0	0
Charlotte	2.1288910434727186	26.402274700278205	2.2197440338276144	35.2034162	-80.8385574	Panera Bread	NC	1000 Blythe Blvd Dilworth Charlotte, NC 28203	0.0	0.0	0.0	0	2	0	1	0	0	0.0	0.0	0.0	1.0	0.0	0.0	0.0	0.0	0.0	0.0	0.0	0.0	0.0	0.0	0.0	0.0	0.0	0.0	0.0	0.0	0.0	0.0	0.0	0.0	0.0	0.0	0.0	1	1	0	0	0
Las Vegas	11.219964578514201	14.198870570041931	10.37598080585291	36.17409310000001	-115.26001049999999	Westcliff Water Store	NV	7518 Westcliff Drive Westside Las Vegas, NV 89145	3.4339872044851463	0.0	0.0	0	2	0	1	0	0	0.0	0.0	0.0	0.0	0.0	0.0	0.0	0.0	0.0	0.0	0.0	0.0	0.0	0.0	0.0	0.0	0.0	0.0	0.0	0.0	0.0	0.0	0.0	0.0	0.0	0.0	0.0	0	0	0	0	0
Phoenix	25.584906661136436	28.65010335896356	23.11230560835088	33.680065899999995	-112.11336680000001	Arizona Line-X	AZ	21242 N Black Canyon Hwy Phoenix, AZ 85027	0.0	0.6931471805599453	0.0	0	2	0	1	0	0	0.0	0.0	0.0	0.0	0.0	0.0	0.0	0.0	0.0	0.0	0.0	0.0	0.0	0.0	0.0	0.0	0.0	0.0	0.0	0.0	0.0	0.0	0.0	0.0	0.0	0.0	0.0	0	0	0	0	0
Las Vegas	8.583811393807903	6.610815192364028	3.302414223335807	36.116052962653896	-115.20726096016399	Peace Ethiopian Market & Cafe	NV	4850 W Flamingo Rd Ste 48 Las Vegas, NV 89103	1.9459101490553132	0.6931471805599453	0.0	0	2	0	1	0	0	0.0	0.0	0.0	0.0	1.0	0.0	0.0	1.0	1.0	0.0	0.0	0.0	0.0	0.0	1.0	0.0	0.0	0.0	0.0	0.0	0.0	0.0	0.0	0.0	0.0	0.0	0.0	1	0	0	0	0
Las Vegas	16.210455533876484	7.8128009847955955	11.34295484680746	36.021584600000004	-115.1196259	Amy's Hallmark Shop	NV	2370 E Serene Ave Ste 210 Southeast Las Vegas, NV 89123	4.07753744390572	1.3862943611198906	0.0	0	2	0	1	1	0	0.0	0.0	0.0	0.0	0.0	0.0	0.0	0.0	1.0	0.0	0.0	0.0	0.0	0.0	0.0	0.0	1.0	0.0	0.0	0.0	0.0	0.0	0.0	0.0	0.0	0.0	0.0	0	0	0	0	0
Edinburgh	2.724109075606395	13.37951508027369	3.505323359157431	55.954896600000005	-3.1447568	Dark Ocean Laser Gaming	EDH	46a Portobello Road Edinburgh EH8 7EL	0.0	0.0	0.0	0	2	0	1	0	0	0.0	0.0	0.0	0.0	0.0	0.0	0.0	1.0	0.0	0.0	0.0	0.0	0.0	0.0	0.0	0.0	0.0	0.0	0.0	0.0	0.0	0.0	0.0	0.0	0.0	0.0	0.0	0	0	0	0	0
Las Vegas	9.076826375873074	3.053448763860905	2.6061275978220264	36.091869	-115.175196	3940 Coffee and Tea	NV	Delano Las Vegas 3940 Las Vegas Blvd S The Strip Las Vegas, NV 89119	3.332204510175204	1.0986122886681098	0.0	0	2	0	0	1	0	0.0	0.0	0.0	0.0	0.0	0.0	0.0	0.0	1.0	0.0	0.0	0.0	0.0	0.0	0.0	0.0	0.0	0.0	0.0	0.0	0.0	0.0	0.0	0.0	0.0	0.0	0.0	0	0	0	0	0
Las Vegas	9.066603913053182	11.358081878036145	7.534108757422998	36.1577388	-115.2357007	Silver Ridge Healthcare Center	NV	1151 S Torrey Pines Dr Westside Las Vegas, NV 89146	3.4965075614664802	0.6931471805599453	0.0	0	2	0	1	0	0	0.0	0.0	0.0	0.0	0.0	0.0	0.0	0.0	0.0	0.0	0.0	0.0	0.0	0.0	0.0	0.0	0.0	0.0	0.0	0.0	0.0	0.0	0.0	0.0	0.0	0.0	0.0	0	0	0	0	0
Las Vegas	15.762679291661067	14.286783610477643	11.42500309341497	36.11287	-115.29746920000001	Habaneros Taco Grill	NV	4225 S Fort Apache Rd Spring Valley Las Vegas, NV 89147	5.327876168789581	2.4849066497880004	0.0	0	2	0	0	0	0	0.0	0.0	0.0	1.0	1.0	1.0	0.0	1.0	1.0	0.0	0.0	0.0	0.0	0.0	1.0	0.0	0.0	0.0	1.0	0.0	0.0	0.0	0.0	0.0	0.0	0.0	0.0	1	0	0	0	0
Madison	1.9816051623178264	7.388317078201821	2.808760851187025	43.080058	-89.369407	Madison Sourdough	WI	916 Williamson St Williamson - Marquette Madison, WI 53703	5.908082938168931	4.007333185232471	0.6931471805599453	0	0	0	0	1	0	0.0	1.0	0.0	1.0	0.0	1.0	0.0	1.0	1.0	0.0	0.0	0.0	0.0	0.0	1.0	0.0	0.0	0.0	1.0	0.0	0.0	0.0	0.0	0.0	0.0	0.0	0.0	1	0	0	0	0
Las Vegas	2.3519411701346464	9.476956273721713	6.57571777245347	36.1737416	-115.1604251	Tufesa	NV	99 S Martin L King Blvd Downtown Las Vegas, NV 89106	0.0	0.6931471805599453	0.0	0	2	0	1	0	0	0.0	0.0	0.0	0.0	0.0	0.0	0.0	0.0	0.0	0.0	0.0	0.0	0.0	0.0	0.0	0.0	0.0	0.0	0.0	0.0	0.0	0.0	0.0	0.0	0.0	0.0	0.0	0	0	0	0	0
Las Vegas	7.254672904011401	6.564344932385916	2.8194901578009683	36.1263623	-115.19864960000001	LV Auto Center	NV	4350 W Spring Mtn Chinatown Las Vegas, NV 89102	0.0	0.6931471805599453	0.0	0	2	0	1	0	0	0.0	0.0	0.0	0.0	0.0	0.0	0.0	0.0	0.0	0.0	0.0	0.0	0.0	0.0	0.0	0.0	0.0	0.0	0.0	0.0	0.0	0.0	0.0	0.0	0.0	0.0	0.0	0	0	0	0	0
Las Vegas	9.81892656822157	11.980859052998868	8.180109446664108	36.1583213	-115.2441874	Subway	NV	1105 S Rainbow Blvd Ste 106 Westside Las Vegas, NV 89146	2.5649493574615367	1.0986122886681098	0.0	0	2	0	1	0	0	0.0	0.0	0.0	1.0	0.0	0.0	0.0	1.0	1.0	0.0	0.0	0.0	0.0	0.0	1.0	0.0	0.0	0.0	0.0	0.0	0.0	0.0	0.0	0.0	0.0	0.0	0.0	1	1	1	0	0
Las Vegas	16.80798192962064	10.520391134225925	10.301765489646062	36.04334	-115.2432315	Jack in the Box	NV	7980 S Rainbow Blvd Southwest Las Vegas, NV 89139	5.204006687076795	2.70805020110221	0.0	0	2	0	1	0	0	0.0	0.0	1.0	1.0	0.0	0.0	0.0	1.0	1.0	0.0	0.0	0.0	0.0	0.0	1.0	0.0	0.0	0.0	0.0	0.0	0.0	0.0	0.0	0.0	0.0	0.0	0.0	1	0	1	0	0
Charlotte	0.7659262457173215	28.01189089272581	4.205026036204431	35.228307	-80.84555	Bluprint	NC	227 W Trade St Ste 100 Charlotte, NC 28202	2.772588722239781	1.6094379124341003	0.0	0	1	0	1	1	0	0.0	0.0	0.0	1.0	1.0	1.0	1.0	0.0	1.0	1.0	0.0	0.0	0.0	0.0	1.0	0.0	1.0	0.0	0.0	0.0	0.0	0.0	0.0	0.0	0.0	0.0	0.0	1	0	0	0	0
Las Vegas	7.657326813650969	2.377078591400234	5.041503508767384	36.0995921	-115.1179537	B & L Shoe & Luggage Repair	NV	4912 S Eastern Ave Ste 5 Southeast Las Vegas, NV 89119	2.833213344056216	1.3862943611198906	0.0	0	2	0	1	0	0	0.0	0.0	0.0	0.0	0.0	0.0	0.0	0.0	1.0	0.0	0.0	0.0	0.0	0.0	0.0	0.0	0.0	0.0	1.0	0.0	0.0	0.0	0.0	0.0	0.0	0.0	0.0	0	0	0	0	0
Las Vegas	6.543243255176825	11.593743690654442	11.594353880767068	36.172774100000005	-115.0632104	Kmart	NV	5051 E Bonanza Rd Sunrise Las Vegas, NV 89110	3.9889840465642745	1.9459101490553132	0.0	0	2	0	1	1	0	0.0	0.0	0.0	0.0	0.0	0.0	0.0	0.0	1.0	0.0	0.0	0.0	0.0	0.0	0.0	0.0	0.0	0.0	1.0	0.0	0.0	0.0	0.0	0.0	0.0	0.0	0.0	0	0	0	0	0
Las Vegas	16.19113136255233	13.953145909130074	11.381104285746147	36.1006557084514	-115.295748191238	Denny's	NV	9310 W Tropicana Ave Spring Valley Las Vegas, NV 89147	5.777652323222656	2.772588722239781	0.6931471805599453	0	2	0	1	0	0	0.0	0.0	0.0	1.0	0.0	0.0	1.0	1.0	1.0	0.0	0.0	0.0	0.0	0.0	1.0	0.0	0.0	0.0	1.0	0.0	0.0	0.0	0.0	0.0	0.0	0.0	0.0	1	0	0	0	0
Phoenix	9.257394279061701	4.209752503842271	10.514018815514964	33.4008047	-111.9956065	Wave Plumbing Supply	AZ	5054 S 40th St Phoenix, AZ 85040	0.0	0.0	0.0	0	2	0	1	0	0	0.0	0.0	0.0	0.0	0.0	0.0	0.0	0.0	1.0	0.0	0.0	0.0	0.0	0.0	0.0	0.0	0.0	0.0	0.0	0.0	0.0	0.0	0.0	0.0	0.0	0.0	0.0	0	0	0	0	0
Las Vegas	16.90776942620298	8.507281134228498	12.016972771292922	36.0153561	-115.1185146	Elixir Organic Cafe & Lounge	NV	9550 S Eastern Ave Ste 180 Southeast Las Vegas, NV 89123	4.330733340286331	2.995732273553991	0.0	2	2	0	0	1	0	0.0	1.0	0.0	1.0	0.0	1.0	1.0	1.0	1.0	0.0	0.0	0.0	0.0	0.0	1.0	0.0	0.0	0.0	1.0	0.0	0.0	0.0	0.0	0.0	0.0	0.0	0.0	1	0	0	0	0
Las Vegas	6.466512251435974	5.523308915801135	1.684075471880878	36.124765999999994	-115.18498000000001	Vegas Getaways	NV	3560 Polaris Ave Ste 13 Chinatown Las Vegas, NV 89103	0.0	0.0	0.0	0	2	0	1	0	0	0.0	0.0	0.0	0.0	0.0	0.0	0.0	0.0	0.0	0.0	0.0	0.0	0.0	0.0	0.0	0.0	0.0	0.0	0.0	0.0	0.0	0.0	0.0	0.0	0.0	0.0	0.0	0	0	0	0	0
Phoenix	8.28076359882725	5.012214937890972	6.7665689090191785	33.4807298	-111.99242949999999	Dunkin' Donuts	AZ	4130 E Thomas Rd Phoenix, AZ 85018	3.1354942159291497	1.0986122886681098	0.0	0	2	0	0	0	0	0.0	1.0	0.0	0.0	0.0	0.0	0.0	0.0	1.0	0.0	0.0	0.0	0.0	0.0	0.0	0.0	0.0	0.0	0.0	0.0	0.0	0.0	0.0	0.0	0.0	0.0	0.0	0	0	0	0	0
Charlotte	1.6110195720290112	25.802518862536196	1.8877180899552537	35.2140739	-80.826589	Elizabeth Creamery	NC	1535 Elizabeth Ave Ste 100 Elizabeth Charlotte, NC 28204	3.713572066704308	0.6931471805599453	0.0	0	2	0	1	0	0	0.0	0.0	0.0	0.0	0.0	0.0	0.0	0.0	1.0	0.0	0.0	0.0	0.0	0.0	0.0	0.0	0.0	0.0	0.0	1.0	0.0	0.0	0.0	0.0	0.0	0.0	0.0	0	0	0	0	0
Las Vegas	13.257991529512074	13.416538669623062	10.009974150242545	36.137449200000006	-115.27831880000001	Firestone Complete Auto Care	NV	2880 S Durango Dr Westside Las Vegas, NV 89117	3.258096538021482	1.0986122886681098	0.0	0	2	0	1	0	0	0.0	0.0	0.0	0.0	0.0	0.0	0.0	0.0	0.0	0.0	0.0	0.0	0.0	0.0	0.0	0.0	0.0	0.0	0.0	0.0	0.0	0.0	0.0	0.0	0.0	0.0	0.0	0	0	0	0	0
Las Vegas	4.0413022874608995	5.592533944220746	2.6084449489420827	36.1374016	-115.1615956	The Garden Grill	NV	Circus Circus Las Vegas 2800 Las Vegas Blvd S The Strip Las Vegas, NV 89109	4.653960350157523	2.70805020110221	0.0	0	1	0	1	1	0	0.0	0.0	0.0	1.0	1.0	0.0	1.0	1.0	1.0	0.0	0.0	0.0	0.0	0.0	1.0	0.0	0.0	0.0	0.0	1.0	0.0	0.0	0.0	0.0	0.0	0.0	0.0	1	0	1	0	0
Charlotte	8.203306273660337	19.301707026994276	5.5389437991902035	35.2038446	-80.75381879999999	Taste of Havana	NC	5534 Ablemarle Rd Eastland Charlotte, NC 28212	0.0	0.0	0.0	0	2	0	1	0	0	0.0	0.0	0.0	0.0	0.0	0.0	1.0	0.0	1.0	0.0	0.0	0.0	0.0	0.0	0.0	0.0	0.0	0.0	0.0	0.0	0.0	0.0	0.0	0.0	0.0	0.0	0.0	1	0	0	0	0
Phoenix	6.548605000714766	10.168929960750622	3.9665501814806907	33.5107343896285	-112.073318521973	Boston Market	AZ	5101 N Central Ave Phoenix, AZ 85012	4.77912349311153	1.791759469228055	0.0	0	2	0	0	0	0	0.0	0.0	0.0	1.0	0.0	1.0	0.0	1.0	1.0	0.0	0.0	0.0	0.0	0.0	1.0	0.0	0.0	0.0	0.0	0.0	0.0	0.0	0.0	0.0	0.0	0.0	0.0	1	0	0	0	0
Phoenix	7.950392432898697	6.386188624505599	5.8589314174311165	33.4949517	-112.0062918	Phoenix Therapeutic Massage & Bodywork	AZ	3501 E Indian School Rd Phoenix, AZ 85018	2.833213344056216	0.6931471805599453	0.0	0	2	0	1	1	0	0.0	0.0	0.0	0.0	0.0	0.0	0.0	0.0	1.0	0.0	0.0	0.0	0.0	0.0	0.0	0.0	0.0	0.0	1.0	0.0	0.0	0.0	0.0	0.0	0.0	0.0	0.0	0	0	0	0	0
Phoenix	6.069318882239705	12.32496916595808	6.033290349835761	33.481102	-112.1295655	M & M Glass Company	AZ	3232 W Thomas Rd Phoenix, AZ 85017	0.0	0.6931471805599453	0.0	0	2	0	1	0	0	0.0	0.0	0.0	0.0	0.0	0.0	0.0	0.0	1.0	0.0	0.0	0.0	0.0	0.0	0.0	0.0	0.0	0.0	0.0	0.0	0.0	0.0	0.0	0.0	0.0	0.0	0.0	0	0	0	0	0
Las Vegas	11.345347707704466	16.56240216689924	12.751461782977932	36.2102846	-115.2499291	Steinberg Diagnostic Medical Imaging	NV	2767 N Tenaya Way Las Vegas, NV 89128	4.442651256490317	2.3978952727983707	0.0	0	2	0	1	0	0	0.0	0.0	0.0	0.0	0.0	0.0	0.0	0.0	0.0	0.0	0.0	0.0	0.0	0.0	0.0	0.0	0.0	0.0	0.0	0.0	0.0	0.0	0.0	0.0	0.0	0.0	0.0	0	0	0	0	0
Las Vegas	13.652739698206851	17.633811093801274	13.790391603782002	36.200764299999996	-115.2815835	Vegas Vacuum & Sewing	NV	2243 N Rampart Blvd Summerlin Las Vegas, NV 89128	2.1972245773362196	1.3862943611198906	0.0	0	2	0	1	0	0	0.0	0.0	0.0	0.0	0.0	0.0	0.0	0.0	1.0	0.0	0.0	0.0	0.0	0.0	0.0	0.0	0.0	0.0	0.0	0.0	0.0	0.0	0.0	0.0	0.0	0.0	0.0	0	0	0	0	0
Charlotte	5.3907492629856835	22.061995688638998	2.1939686258350064	35.1967799	-80.79077099999999	Gus's SIR Beef Restaurant	NC	4101 Monroe Rd Cotswold Charlotte, NC 28205	3.1780538303479458	1.6094379124341003	0.0	0	0	0	1	0	0	0.0	0.0	0.0	1.0	0.0	1.0	1.0	1.0	1.0	0.0	0.0	0.0	0.0	0.0	1.0	0.0	0.0	0.0	1.0	0.0	0.0	0.0	0.0	0.0	0.0	0.0	0.0	1	0	0	0	0
Las Vegas	4.883229414095207	6.743416773257689	3.0872350347491317	36.1418125	-115.1800125	Phantom	NV	The Venetian 3355 Las Vegas Blvd S Westside Las Vegas, NV 89109	5.929589143389895	3.912023005428146	0.0	0	2	0	1	0	0	0.0	0.0	0.0	0.0	0.0	0.0	0.0	0.0	0.0	0.0	0.0	0.0	0.0	0.0	0.0	0.0	0.0	0.0	0.0	0.0	0.0	0.0	0.0	0.0	0.0	0.0	0.0	0	0	0	0	0
Las Vegas	12.056758968924061	3.778272119930065	6.049408540459571	36.060839	-115.16356999999999	National Car Rental	NV	7135 Gilespie St Southeast Las Vegas, NV 89119	5.0369526024136295	1.9459101490553132	0.0	0	2	0	1	0	0	0.0	0.0	0.0	0.0	0.0	0.0	0.0	0.0	0.0	0.0	0.0	0.0	0.0	0.0	0.0	0.0	0.0	0.0	0.0	0.0	0.0	0.0	0.0	0.0	0.0	0.0	0.0	0	0	0	0	0
Las Vegas	6.744993171832551	12.471072889247493	8.8266854580452	36.1894539	-115.2053235	Alibi Casino	NV	1690 N Decatur Blvd Las Vegas, NV 89108	2.5649493574615367	0.6931471805599453	0.0	0	2	0	1	0	0	0.0	0.0	0.0	0.0	0.0	0.0	0.0	0.0	0.0	0.0	0.0	0.0	0.0	0.0	0.0	0.0	0.0	0.0	0.0	0.0	0.0	0.0	0.0	0.0	0.0	0.0	0.0	0	0	0	0	0
Las Vegas	7.474363288037529	1.861367676350258	4.397563389081825	36.1002609	-115.1252933	Fox's Spy Outlet	NV	2055 E Tropicana Ave Ste 10 Eastside Las Vegas, NV 89119	0.0	0.0	0.0	0	2	0	1	0	0	0.0	0.0	0.0	0.0	0.0	0.0	0.0	0.0	1.0	0.0	0.0	0.0	0.0	0.0	0.0	0.0	0.0	0.0	0.0	0.0	0.0	0.0	0.0	0.0	0.0	0.0	0.0	0	0	0	0	0
Las Vegas	6.25557886916433	3.2989371406731047	0.8403971381617508	36.1147119	-115.16127639999999	Meridian Luxury Resorts	NV	250 E Flamingo Rd Eastside Las Vegas, NV 89169	3.4657359027997265	0.0	0.0	0	2	0	1	2	0	0.0	0.0	0.0	0.0	0.0	0.0	0.0	0.0	0.0	0.0	0.0	0.0	0.0	0.0	0.0	0.0	0.0	0.0	0.0	0.0	0.0	0.0	0.0	0.0	0.0	0.0	0.0	0	0	0	0	0
Las Vegas	5.738820144815952	7.579095299525829	3.768447442859917	36.1439411	-115.1926233	Eye Glass World #18	NV	3819 W Sahara Avenue Westside Las Vegas, NV 89102	0.0	0.0	0.0	0	2	0	1	0	0	0.0	0.0	0.0	0.0	0.0	0.0	0.0	0.0	0.0	0.0	0.0	0.0	0.0	0.0	0.0	0.0	0.0	0.0	0.0	0.0	0.0	0.0	0.0	0.0	0.0	0.0	0.0	0	0	0	0	0
Las Vegas	1.868692882150958	7.6647382833009035	5.031756730697159	36.1581502	-115.15319280000001	Pop's Hoppin Auto Repair	NV	1115 S Main St Downtown Las Vegas, NV 89104	0.0	0.0	0.0	0	2	0	1	0	0	0.0	0.0	0.0	0.0	0.0	0.0	0.0	0.0	0.0	0.0	0.0	0.0	0.0	0.0	0.0	0.0	0.0	0.0	0.0	0.0	0.0	0.0	0.0	0.0	0.0	0.0	0.0	0	0	0	0	0
Las Vegas	15.06827582960337	9.609039994931463	8.71079702618189	36.06279779999999	-115.2427746	Panda Express	NV	6925 S Rainbow Blvd Spring Valley Las Vegas, NV 89118	5.480638923341991	2.0794415416798357	0.0	0	2	0	1	0	0	0.0	0.0	0.0	1.0	0.0	1.0	0.0	1.0	1.0	0.0	0.0	0.0	0.0	0.0	1.0	0.0	0.0	0.0	0.0	0.0	0.0	0.0	0.0	0.0	0.0	0.0	0.0	1	0	0	0	0
Edinburgh	0.3417792815881741	10.592586831585034	1.0776444693802676	55.9562647	-3.189307	Cheynes	EDH	45a York Place New Town Edinburgh EH1 3HP	0.0	0.6931471805599453	0.0	0	2	0	1	1	0	0.0	0.0	0.0	0.0	0.0	0.0	0.0	1.0	1.0	0.0	0.0	0.0	0.0	0.0	0.0	0.0	0.0	0.0	0.0	0.0	0.0	0.0	0.0	0.0	0.0	0.0	0.0	0	0	0	0	0
Phoenix	6.12390759909808	10.373445109712295	3.80127900739639	33.5064609	-112.08292	Alta Vista Veterinary Hospital	AZ	4706 N 7th Ave Phoenix, AZ 85013	4.624972813284271	1.791759469228055	0.0	0	2	0	1	0	0	0.0	0.0	0.0	0.0	0.0	0.0	0.0	0.0	0.0	0.0	0.0	0.0	0.0	0.0	0.0	0.0	0.0	0.0	0.0	0.0	0.0	0.0	0.0	0.0	0.0	0.0	0.0	0	0	0	0	0
Las Vegas	4.833727237334215	3.8743745351339807	2.416147749874276	36.124423	-115.146372	86'd Eats	NV	3667 Las Vegas Blvd Eastside Las Vegas, NV 89109	0.0	0.6931471805599453	0.0	0	2	0	1	0	0	0.0	0.0	0.0	0.0	0.0	0.0	0.0	0.0	1.0	0.0	0.0	0.0	0.0	0.0	0.0	0.0	0.0	0.0	0.0	0.0	0.0	0.0	0.0	0.0	0.0	0.0	0.0	0	0	0	0	0
Edinburgh	0.4971298459934142	10.641893307068042	1.2413286047235121	55.9577152	-3.1884109	Karen's Beauty Room	EDH	Within John Malcolm Hairdressing 2a Forth Street New Town Edinburgh EH1 3LD	0.0	0.0	0.0	0	2	0	1	0	0	0.0	0.0	0.0	0.0	0.0	0.0	0.0	0.0	0.0	0.0	0.0	0.0	0.0	0.0	0.0	0.0	0.0	0.0	0.0	0.0	0.0	0.0	0.0	0.0	0.0	0.0	0.0	0	0	0	0	0
Phoenix	1.2558082047847252	6.123163070945266	3.9876317586188414	33.440413	-112.073431	The Ruby Room	AZ	717 S Central Ave Phoenix, AZ 85073	0.0	0.0	0.0	0	1	0	1	0	1	0.0	0.0	0.0	1.0	0.0	0.0	0.0	0.0	1.0	0.0	0.0	0.0	0.0	0.0	0.0	0.0	0.0	0.0	1.0	0.0	0.0	1.0	0.0	0.0	1.0	0.0	0.0	0	0	0	1	0
Edinburgh	1.417972786938618	10.031168939940345	0.6430979824812942	55.9428431	-3.2013467	Red, Hot + Blue Tattoo	EDH	1a Brougham Pl Tollcross Edinburgh EH3 9HM	0.0	0.0	0.0	0	2	0	1	1	0	0.0	0.0	0.0	0.0	0.0	0.0	0.0	0.0	0.0	0.0	0.0	0.0	0.0	0.0	0.0	0.0	0.0	0.0	0.0	0.0	0.0	0.0	0.0	0.0	0.0	0.0	0.0	0	0	0	0	0
Las Vegas	4.833727237334215	3.8743745351339807	2.416147749874276	36.124423	-115.146372	Cole Haan	NV	The Shoppes at Palazzo 3339 Las Vegas Blvd S Eastside Las Vegas, NV 89109	3.4965075614664802	1.0986122886681098	0.0	0	2	0	1	2	0	0.0	0.0	0.0	0.0	0.0	0.0	0.0	0.0	1.0	0.0	0.0	0.0	0.0	0.0	0.0	0.0	0.0	0.0	0.0	0.0	0.0	0.0	0.0	0.0	0.0	0.0	0.0	0	0	0	0	0
Las Vegas	8.963025561984773	8.919875792772121	5.295154424777457	36.1322697	-115.2254621	Celebrations Bridal & Fashion	NV	3131 S Jones Blvd Westside Las Vegas, NV 89146	4.30406509320417	2.5649493574615367	0.0	0	2	0	1	1	0	0.0	0.0	0.0	0.0	0.0	0.0	0.0	0.0	1.0	0.0	0.0	0.0	0.0	0.0	0.0	0.0	0.0	0.0	1.0	0.0	0.0	0.0	0.0	0.0	0.0	0.0	0.0	0	0	0	0	0
Charlotte	1.079576716179379	26.491807404251915	2.4068869701484368	35.2142762248903	-80.8346613903209	Starbucks	NC	900 Metropolitan Ave Myers Park Charlotte, NC 28204	3.8501476017100584	1.3862943611198906	0.0	0	2	0	1	2	0	0.0	0.0	0.0	0.0	0.0	0.0	0.0	0.0	1.0	0.0	0.0	0.0	0.0	0.0	0.0	0.0	0.0	0.0	0.0	0.0	0.0	0.0	0.0	0.0	0.0	0.0	0.0	0	0	0	0	0
Phoenix	7.158064508570653	8.020521343942299	4.485577494299486	33.506367600000004	-112.0335679	Christopher Huston, MD - TOCA	AZ	2222 E Highland Ave Ste 300 Phoenix, AZ 85016	0.0	0.0	0.0	0	2	0	1	0	0	0.0	0.0	0.0	0.0	0.0	0.0	0.0	0.0	0.0	0.0	0.0	0.0	0.0	0.0	0.0	0.0	0.0	0.0	0.0	0.0	0.0	0.0	0.0	0.0	0.0	0.0	0.0	0	0	0	0	0
Las Vegas	0.8794705954573799	9.471179349399806	7.3293731675790825	36.175	-115.136389	Postmates	NV	Las Vegas, NV	0.0	0.0	0.0	0	2	0	1	3	0	0.0	0.0	0.0	0.0	0.0	0.0	0.0	0.0	1.0	0.0	0.0	0.0	0.0	0.0	0.0	0.0	0.0	0.0	0.0	0.0	0.0	0.0	0.0	0.0	0.0	0.0	0.0	0	0	0	0	0
Edinburgh	0.5464202155040604	10.849831105596202	0.8313257055229875	55.9484553	-3.1864096	The Caves	EDH	8-12 Niddry Street South Newington Edinburgh EH1 1NS	3.295836866004329	0.6931471805599453	0.0	0	2	0	1	3	0	0.0	0.0	0.0	0.0	0.0	0.0	0.0	0.0	1.0	0.0	0.0	0.0	0.0	0.0	0.0	0.0	0.0	0.0	0.0	0.0	0.0	0.0	0.0	0.0	0.0	0.0	0.0	0	0	0	0	0
Pittsburgh	8.055089860674988	16.049123921379206	37.455724719151256	40.370574	-79.982416	Rowdy BBQ	PA	3900 Saw Mill Run Blvd Pittsburgh, PA 15227	4.07753744390572	1.9459101490553132	0.0	1	2	0	1	0	0	0.0	1.0	0.0	1.0	0.0	1.0	0.0	1.0	1.0	0.0	0.0	0.0	0.0	0.0	1.0	0.0	0.0	0.0	1.0	0.0	0.0	0.0	0.0	0.0	0.0	0.0	0.0	1	0	0	0	0
Las Vegas	5.59182116622433	4.553730670516597	1.0497105323803033	36.1243686	-115.16853590000002	Fusion Mixology Bar	NV	Inside the Palazzo The Strip Las Vegas, NV 89109	4.74493212836325	1.9459101490553132	0.6931471805599453	3	1	0	1	1	2	0.0	0.0	0.0	1.0	1.0	0.0	0.0	0.0	1.0	0.0	1.0	0.0	0.0	0.0	0.0	0.0	0.0	0.0	0.0	1.0	0.0	0.0	0.0	0.0	0.0	0.0	0.0	0	0	0	1	0
Pittsburgh	5.074611839805889	24.49706918460331	38.35454753062502	40.4530429	-79.9424203	Amberson Apartments	PA	3 Bayard Rd Shadyside Pittsburgh, PA 15213	2.3978952727983707	0.0	0.0	0	2	0	1	0	0	0.0	0.0	0.0	0.0	0.0	0.0	0.0	0.0	1.0	0.0	0.0	0.0	0.0	0.0	0.0	0.0	0.0	0.0	0.0	0.0	0.0	0.0	0.0	0.0	0.0	0.0	0.0	0	0	0	0	0
Las Vegas	17.90047957689859	14.968283985857513	12.74350601087688	36.0860429	-115.30752749999999	A2Z Smoke Shop	NV	5651 S Grand Canyon Dr Ste 120 Spring Valley Las Vegas, NV 89148	2.772588722239781	1.0986122886681098	0.0	0	2	0	1	0	0	0.0	0.0	0.0	0.0	0.0	0.0	0.0	0.0	1.0	0.0	0.0	0.0	0.0	0.0	0.0	0.0	0.0	0.0	0.0	0.0	0.0	0.0	0.0	0.0	0.0	0.0	0.0	0	0	0	0	0
Edinburgh	0.7355819151888076	10.92785555290089	0.9057098176599084	55.9468231	-3.1855472000000002	Tutto Matto	EDH	16 Nicolson Street Newington Edinburgh EH8 9DH	2.5649493574615367	1.6094379124341003	0.0	1	2	0	1	1	0	0.0	0.0	0.0	1.0	0.0	0.0	1.0	1.0	1.0	1.0	0.0	0.0	0.0	0.0	0.0	0.0	0.0	0.0	0.0	0.0	0.0	0.0	0.0	0.0	0.0	0.0	0.0	1	0	0	0	1
Las Vegas	13.43496299722041	6.907803099483066	6.860716053614992	36.062232200000004	-115.2101877	SYNLawn Nevada	NV	6975 S. Decatur Blvd. Ste 160 Spring Valley Las Vegas, NV 89118	0.0	0.0	0.0	0	2	0	1	0	0	0.0	0.0	0.0	0.0	0.0	0.0	0.0	0.0	1.0	0.0	0.0	0.0	0.0	0.0	0.0	0.0	0.0	0.0	0.0	0.0	0.0	0.0	0.0	0.0	0.0	0.0	0.0	0	0	0	0	0
Las Vegas	4.382234461131155	5.118575909557697	5.230446300721466	36.130978000000006	-115.11591399999999	La Bonita Supermercado	NV	2500 E Desert Inn Eastside Las Vegas, NV 89136	5.44673737166631	2.0794415416798357	0.0	0	2	0	1	0	0	0.0	0.0	0.0	1.0	0.0	0.0	0.0	0.0	1.0	0.0	0.0	0.0	0.0	0.0	1.0	0.0	0.0	0.0	1.0	0.0	0.0	0.0	0.0	0.0	0.0	0.0	0.0	0	0	0	0	0
Las Vegas	10.565937297241971	15.12600215268178	11.289422118790036	36.195254	-115.247804	Rocksprings Dental Group	NV	7175 W Lake Mead Blvd Ste 110 Las Vegas, NV 89128	3.4011973816621555	1.791759469228055	0.0	0	2	0	1	0	0	0.0	0.0	0.0	0.0	0.0	0.0	0.0	0.0	0.0	0.0	0.0	0.0	0.0	0.0	0.0	0.0	0.0	0.0	0.0	0.0	0.0	0.0	0.0	0.0	0.0	0.0	0.0	0	0	0	0	0
Phoenix	14.340017587628314	18.542141204216545	12.183991135326862	33.574974	-112.12103379999999	Torrid	AZ	9617 Metro Pkwy W Ste 2010 Phoenix, AZ 85051	2.1972245773362196	0.0	0.0	0	2	0	1	1	0	0.0	0.0	0.0	0.0	0.0	0.0	0.0	0.0	1.0	0.0	0.0	0.0	0.0	0.0	0.0	0.0	0.0	0.0	1.0	0.0	0.0	0.0	0.0	0.0	0.0	0.0	0.0	0	0	0	0	0
Las Vegas	17.077700294384684	8.642808003651748	10.967599157402816	36.0162367	-115.1731297	Coast To Coast Bowling Services	NV	9555 Las Vegas Blvd S Ste 110 Southeast Las Vegas, NV 89123	2.0794415416798357	0.0	0.0	0	2	0	1	1	0	0.0	0.0	0.0	0.0	0.0	0.0	0.0	0.0	1.0	0.0	0.0	0.0	0.0	0.0	0.0	0.0	0.0	0.0	0.0	0.0	0.0	0.0	0.0	0.0	0.0	0.0	0.0	0	0	0	0	0
Charlotte	12.648397630488653	33.633450577300344	12.890682022109962	35.137552	-80.933611	YMCA of Greater Charlotte	NC	2135 Ayrsley Town Blvd Steele Creek Charlotte, NC 28273	3.332204510175204	0.6931471805599453	0.0	0	2	0	1	0	0	0.0	0.0	0.0	0.0	0.0	0.0	0.0	1.0	0.0	0.0	0.0	0.0	0.0	0.0	0.0	0.0	0.0	0.0	0.0	0.0	0.0	0.0	0.0	0.0	0.0	0.0	0.0	0	0	0	0	0
Phoenix	15.478363079927156	19.860855625564394	13.419999683044706	33.582278	-112.133284	Mr Formal	AZ	3434 W Peoria Ave Phoenix, AZ 85029	0.0	0.6931471805599453	0.0	0	2	0	1	1	0	0.0	0.0	0.0	0.0	0.0	0.0	0.0	0.0	1.0	0.0	0.0	0.0	0.0	0.0	0.0	0.0	0.0	0.0	1.0	0.0	0.0	0.0	0.0	0.0	0.0	0.0	0.0	0	0	0	0	0
Charlotte	13.883202820041419	26.600146615688118	14.565072749959363	35.3166944318598	-80.7405517995358	Flying Saucer Draught Emporium	NC	9605 N Tryon St Ste A University City Charlotte, NC 28262	6.8679744089702925	4.060443010546419	0.6931471805599453	1	1	0	0	1	1	0.0	1.0	0.0	1.0	1.0	0.0	1.0	0.0	1.0	0.0	1.0	0.0	0.0	0.0	1.0	0.0	0.0	0.0	1.0	0.0	0.0	0.0	0.0	0.0	0.0	0.0	0.0	1	0	0	1	0
Phoenix	7.862674455990184	8.316286035686442	5.216895718544921	33.510538000000004	-112.02731299999999	Paradise Bakery & Cafe	AZ	2502 E Camelback Rd Ste 119 Phoenix, AZ 85016	6.202535517187923	3.7612001156935624	0.0	1	2	0	0	0	0	0.0	1.0	0.0	1.0	0.0	1.0	0.0	1.0	1.0	0.0	0.0	0.0	0.0	0.0	1.0	0.0	0.0	0.0	1.0	0.0	0.0	0.0	0.0	0.0	0.0	0.0	0.0	1	1	0	0	0
Las Vegas	6.085635568770188	2.7747252018590665	3.779935037376113	36.1125391	-115.1287325	WorldMark Las Vegas - Spencer Street	NV	4225 Spencer St Eastside Las Vegas, NV 89119	3.912023005428146	1.6094379124341003	0.0	0	2	0	0	1	0	0.0	0.0	0.0	0.0	0.0	0.0	0.0	0.0	1.0	0.0	0.0	0.0	0.0	0.0	0.0	0.0	0.0	0.0	0.0	0.0	0.0	0.0	0.0	0.0	0.0	0.0	0.0	0	0	0	0	0
Las Vegas	7.56154072900079	1.8201583313704905	2.034503703458581	36.1010104	-115.1560798	ABC Stores 114	NV	378 E Tropicana Ave Eastside Las Vegas, NV 89169	4.1588830833596715	1.3862943611198906	0.0	0	2	0	1	0	0	0.0	0.0	0.0	0.0	0.0	0.0	0.0	0.0	1.0	0.0	0.0	0.0	0.0	0.0	0.0	0.0	0.0	0.0	0.0	0.0	0.0	0.0	0.0	0.0	0.0	0.0	0.0	0	0	0	0	0
Phoenix	19.386905653604522	21.658119349187473	16.71525247248091	33.6263605	-112.06640209999999	Allstate Insurance: Heather Everette	AZ	15414 N 7th St, Ste 9 Phoenix, AZ 85022	0.0	0.0	0.0	0	2	0	1	0	0	0.0	0.0	0.0	0.0	0.0	0.0	0.0	0.0	0.0	0.0	0.0	0.0	0.0	0.0	0.0	0.0	0.0	0.0	0.0	0.0	0.0	0.0	0.0	0.0	0.0	0.0	0.0	0	0	0	0	0
Las Vegas	2.5157378712700043	6.145426234145924	4.771751866967146	36.1446075439453	-115.13208770751999	Chuy's Tacos	NV	1510 E Sahara Ave Downtown Las Vegas, NV 89104	3.044522437723423	2.1972245773362196	0.0	2	2	0	1	0	0	1.0	1.0	0.0	1.0	1.0	1.0	0.0	1.0	1.0	0.0	0.0	0.0	0.0	0.0	1.0	0.0	0.0	0.0	0.0	0.0	0.0	0.0	0.0	0.0	0.0	0.0	0.0	1	0	0	0	0
Charlotte	5.682200833921869	26.424263783746976	4.477933432259562	35.171735299999995	-80.8492716	Total Wine & More	NC	1600 E Woodlawn Ave Charlotte, NC 28209	6.016157159698354	3.1354942159291497	0.0	0	2	0	1	1	0	0.0	0.0	0.0	0.0	0.0	0.0	0.0	0.0	1.0	0.0	0.0	0.0	0.0	0.0	0.0	0.0	0.0	0.0	1.0	0.0	0.0	0.0	0.0	0.0	0.0	0.0	0.0	0	0	0	0	0
Las Vegas	6.722545076895771	4.479780229453858	0.6976672147222903	36.1171675	-115.177901	Diamond Lounge	NV	Caesars Palace Las Vegas Hotel & Casino 3570 Las Vegas Blvd S The Strip Las Vegas, NV 89109	3.784189633918261	0.6931471805599453	0.0	0	2	0	1	0	0	0.0	0.0	0.0	0.0	0.0	0.0	0.0	0.0	0.0	0.0	0.0	0.0	0.0	0.0	0.0	0.0	0.0	0.0	0.0	0.0	0.0	0.0	0.0	0.0	0.0	0.0	0.0	0	0	0	0	0
Edinburgh	0.6752797666002573	10.364860789820849	0.340472183164728	55.9482174	-3.1942969	Christmas Shop	EDH	88-90 W Bow Grassmarket Edinburgh EH1 2HH	0.0	0.0	0.0	0	2	0	1	1	0	0.0	0.0	0.0	0.0	0.0	0.0	0.0	0.0	1.0	0.0	0.0	0.0	0.0	0.0	0.0	0.0	0.0	0.0	0.0	0.0	0.0	0.0	0.0	0.0	0.0	0.0	0.0	0	0	0	0	0
Las Vegas	16.498910801238008	23.045260210880844	19.32777631711748	36.27058220000001	-115.2673642	Mommy 2B Experience	NV	7901 W Tropical Pkwy Ste 110 Centennial Las Vegas, NV 89149	1.6094379124341003	0.0	0.0	0	2	0	1	0	0	0.0	0.0	0.0	0.0	0.0	0.0	0.0	0.0	1.0	0.0	0.0	0.0	0.0	0.0	0.0	0.0	0.0	0.0	0.0	0.0	0.0	0.0	0.0	0.0	0.0	0.0	0.0	0	0	0	0	0
Las Vegas	11.013092632886954	15.39118497091838	11.54711268665157	36.1946975	-115.2531978	Chuck E. Cheese's	NV	7381 W Lake Mead Blvd Las Vegas, NV 89128	5.267858159063328	3.2188758248682006	0.0	1	2	0	1	1	0	0.0	0.0	0.0	1.0	0.0	0.0	0.0	1.0	1.0	1.0	0.0	0.0	0.0	0.0	1.0	0.0	0.0	0.0	0.0	0.0	0.0	0.0	0.0	0.0	0.0	0.0	0.0	1	0	0	0	1
Las Vegas	1.9940568498196374	8.455954666609504	5.643248690103659	36.1648071368331	-115.15758135760001	Auntie Anne's Soft Pretzel	NV	875 S Grand Central Pkwy Bldg 775 , Ste 1320 Downtown Las Vegas, NV 89106	4.060443010546419	2.4849066497880004	0.0	0	2	0	1	0	0	0.0	1.0	0.0	1.0	0.0	0.0	0.0	1.0	1.0	0.0	0.0	0.0	0.0	0.0	1.0	0.0	0.0	0.0	0.0	0.0	0.0	0.0	0.0	0.0	0.0	0.0	0.0	0	0	0	0	0
Las Vegas	3.5133827552726116	11.49156862198817	8.629584225146589	36.1922841	-115.15927179999998	Cut and Taste	NV	495 S Grand Central Pkwy Las Vegas, NV 89106	0.0	0.0	0.0	0	2	0	1	0	0	0.0	0.0	0.0	0.0	0.0	0.0	0.0	0.0	1.0	0.0	0.0	0.0	0.0	0.0	0.0	0.0	0.0	0.0	0.0	0.0	0.0	0.0	0.0	0.0	0.0	0.0	0.0	0	0	0	0	0
Pittsburgh	6.063285785942048	14.291431335183697	43.438853325725944	40.398694	-80.04425400000001	Jet's Pizza	PA	1810 Dormont Ave Dormont Pittsburgh, PA 15216	1.791759469228055	1.0986122886681098	0.6931471805599453	0	2	0	1	1	0	1.0	0.0	0.0	0.0	0.0	0.0	0.0	1.0	1.0	0.0	0.0	0.0	0.0	0.0	1.0	0.0	0.0	0.0	0.0	0.0	0.0	0.0	0.0	0.0	0.0	0.0	0.0	1	0	0	0	1
Las Vegas	0.9015498502093895	8.690043394650722	6.29032400799798	36.167983899999996	-115.1455608	St Joan of Arc Church	NV	315 S Casino Center Boulevard Downtown Las Vegas, NV 89101	3.6109179126442243	1.0986122886681098	0.0	0	2	0	1	0	0	0.0	0.0	0.0	0.0	0.0	0.0	0.0	0.0	0.0	0.0	0.0	0.0	0.0	0.0	0.0	0.0	0.0	0.0	0.0	0.0	0.0	0.0	0.0	0.0	0.0	0.0	0.0	0	0	0	0	0
Pittsburgh	6.586417779501566	24.39066143894813	35.950643104084946	40.435821999999995	-79.9231662	Sichuan Gourmet	PA	1900 Murray Ave Squirrel Hill Pittsburgh, PA 15217	6.967909201801884	3.2188758248682006	0.0	0	2	0	1	1	0	1.0	0.0	0.0	1.0	0.0	1.0	1.0	1.0	1.0	1.0	0.0	0.0	0.0	0.0	1.0	0.0	1.0	0.0	0.0	0.0	0.0	0.0	0.0	0.0	0.0	0.0	0.0	1	0	0	0	0
Madison	2.64003970130184	6.780914924248132	3.4388697172769076	43.0843766	-89.36297049999999	Hatch Art House	WI	1248 Williamson St Williamson - Marquette Madison, WI 53703	1.9459101490553132	0.6931471805599453	0.0	0	2	0	1	1	0	0.0	0.0	0.0	0.0	0.0	0.0	0.0	0.0	1.0	0.0	0.0	0.0	0.0	0.0	0.0	0.0	0.0	0.0	0.0	0.0	0.0	0.0	0.0	0.0	0.0	0.0	0.0	0	0	0	0	0
Las Vegas	6.495920821367729	10.459540078123773	10.818561484312916	36.1600033	-115.0639372	Goodwill of Southern Nevada, Inc.	NV	31 N Nellis Blvd Sunrise Las Vegas, NV 89110	2.5649493574615367	0.6931471805599453	0.0	0	2	0	1	0	0	0.0	0.0	0.0	0.0	0.0	0.0	0.0	0.0	1.0	0.0	0.0	0.0	0.0	0.0	0.0	0.0	0.0	0.0	0.0	0.0	0.0	0.0	0.0	0.0	0.0	0.0	0.0	0	0	0	0	0
Madison	3.6480735134344817	12.229626859391457	3.542858072005969	43.0430097	-89.4033796	Little Big Load	WI	2115 Fish Hatchery Rd Burr Oaks Madison, WI 53713	0.0	0.6931471805599453	0.0	0	2	0	0	0	0	0.0	0.0	0.0	0.0	0.0	0.0	0.0	0.0	0.0	0.0	0.0	0.0	0.0	0.0	0.0	0.0	0.0	0.0	1.0	0.0	0.0	0.0	0.0	0.0	0.0	0.0	0.0	0	0	0	0	0
Las Vegas	11.340624510554019	13.278233725445135	9.533209188694233	36.1594475	-115.2612847	Big O Tires and Service Centers	NV	7620 W Charleston Blvd Westside Las Vegas, NV 89117	2.1972245773362196	0.0	0.0	0	2	0	1	0	0	0.0	0.0	0.0	0.0	0.0	0.0	0.0	0.0	0.0	0.0	0.0	0.0	0.0	0.0	0.0	0.0	0.0	0.0	0.0	0.0	0.0	0.0	0.0	0.0	0.0	0.0	0.0	0	0	0	0	0
Charlotte	6.938386084131284	26.189153571739496	5.43725120757623	35.160312299999994	-80.8490691	Lucky Lou's Tavern	NC	5124 Park Rd South Park Charlotte, NC 28209	4.997212273764115	2.3978952727983707	0.0	1	1	0	0	0	1	0.0	1.0	0.0	1.0	1.0	0.0	1.0	0.0	1.0	0.0	1.0	1.0	0.0	0.0	1.0	0.0	0.0	0.0	1.0	0.0	0.0	1.0	0.0	0.0	0.0	0.0	0.0	1	0	0	1	0
Las Vegas	5.650531487955272	3.5258634368053356	1.348635331153266	36.1190699	-115.1564608	Wells Fargo Bank	NV	3800 Howard Hughes Pkwy Eastside Las Vegas, NV 89169	3.828641396489095	0.6931471805599453	0.0	0	2	0	1	0	0	0.0	0.0	0.0	0.0	0.0	0.0	0.0	0.0	0.0	0.0	0.0	0.0	0.0	0.0	0.0	0.0	0.0	0.0	0.0	0.0	0.0	0.0	0.0	0.0	0.0	0.0	0.0	0	0	0	0	0
Charlotte	9.723659597910096	32.346523725440086	12.400202251201758	35.3101345	-80.83946	Sunset Auto Inspection	NC	5221 Sunset Rd Derita Charlotte, NC 28269	0.0	0.6931471805599453	0.0	0	2	0	1	0	0	0.0	0.0	0.0	0.0	0.0	0.0	0.0	0.0	0.0	0.0	0.0	0.0	0.0	0.0	0.0	0.0	0.0	0.0	0.0	0.0	0.0	0.0	0.0	0.0	0.0	0.0	0.0	0	0	0	0	0
Charlotte	12.333564927347673	26.822744192835035	13.195936034818127	35.309098	-80.756007	Bikinis Sports Bar & Grill	NC	520 University Center Blvd University City Charlotte, NC 28262	3.912023005428146	2.3978952727983707	0.0	0	1	0	0	1	1	0.0	1.0	0.0	1.0	1.0	0.0	1.0	0.0	1.0	0.0	1.0	0.0	0.0	0.0	1.0	0.0	0.0	0.0	1.0	0.0	0.0	0.0	0.0	0.0	0.0	1.0	0.0	1	0	0	1	0
Las Vegas	5.568235142440705	4.564643886651393	1.071927990993282	36.1245525614574	-115.16840435564501	Trattoria Reggiano	NV	The Venetian Resort Hotel Casino 3355 Las Vegas Blvd S The Strip Las Vegas, NV 89109	6.968850378341948	4.31748811353631	0.6931471805599453	0	1	0	0	1	0	0.0	0.0	0.0	1.0	1.0	0.0	1.0	1.0	1.0	1.0	0.0	0.0	0.0	0.0	1.0	0.0	0.0	1.0	0.0	1.0	0.0	0.0	0.0	0.0	0.0	0.0	0.0	1	0	0	0	0
Pittsburgh	6.8256674215322874	17.026931977266162	48.04131427964578	40.4402775	-80.0808269	Creekhouse	PA	288 W Steuben St Pittsburgh, PA 15205	5.1647859739235145	2.8903717578961645	0.0	0	1	0	0	1	1	0.0	1.0	0.0	1.0	1.0	0.0	1.0	0.0	1.0	0.0	1.0	0.0	0.0	0.0	1.0	0.0	0.0	0.0	1.0	0.0	0.0	0.0	0.0	0.0	0.0	1.0	0.0	1	0	0	1	0
Charlotte	5.539753405805371	26.538070220052063	4.43085509215555	35.173141799999996	-80.8502018	Details Home Boutique	NC	Park Road Shopping Center 4301 Park Rd, Ste D Charlotte, NC 28209	0.0	0.0	0.0	0	2	0	1	1	0	0.0	0.0	0.0	0.0	0.0	0.0	0.0	0.0	1.0	0.0	0.0	0.0	0.0	0.0	0.0	0.0	0.0	0.0	1.0	0.0	0.0	0.0	0.0	0.0	0.0	0.0	0.0	0	0	0	0	0
Pittsburgh	9.585823573139596	26.022403804796856	32.93844767754026	40.425920500000004	-79.88935529999999	Laundry Room Towne Cleaners	PA	1637 Braddock Ave Pittsburgh, PA 15218	3.044522437723423	0.6931471805599453	0.0	0	2	0	1	0	0	0.0	0.0	0.0	0.0	0.0	0.0	0.0	0.0	1.0	0.0	0.0	0.0	0.0	0.0	0.0	0.0	0.0	0.0	0.0	0.0	0.0	0.0	0.0	0.0	0.0	0.0	0.0	0	0	0	0	0
Las Vegas	10.258236830260351	4.730242316422498	3.692917394737456	36.087641999999995	-115.193851	New Air	NV	5670 Wynn Rd Ste C Las Vegas, NV 89118	0.0	0.0	0.0	0	2	0	1	0	0	0.0	0.0	0.0	0.0	0.0	0.0	0.0	0.0	1.0	0.0	0.0	0.0	0.0	0.0	0.0	0.0	0.0	0.0	0.0	0.0	0.0	0.0	0.0	0.0	0.0	0.0	0.0	0	0	0	0	0
Phoenix	8.463054774740318	10.354653548960028	5.662855806789195	33.524574300000005	-112.04750729999999	Floral Designs by Jeremiah	AZ	6062 N 16th St Phoenix, AZ 85016	0.0	0.0	0.0	0	2	0	1	1	0	0.0	0.0	0.0	0.0	0.0	0.0	0.0	0.0	1.0	0.0	0.0	0.0	0.0	0.0	0.0	0.0	0.0	0.0	0.0	0.0	0.0	0.0	0.0	0.0	0.0	0.0	0.0	0	0	0	0	0
Las Vegas	3.9048790783373097	5.755485481209647	2.770640997067609	36.138943	-115.161629	Cvs Pharmacy	NV	2700 Las Vegas Blvd S Ste 100 The Strip Las Vegas, NV 89109	4.330733340286331	2.1972245773362196	0.0	0	2	0	1	0	0	0.0	0.0	0.0	0.0	0.0	0.0	0.0	0.0	1.0	0.0	0.0	0.0	0.0	0.0	0.0	0.0	0.0	0.0	0.0	1.0	0.0	0.0	0.0	0.0	0.0	0.0	0.0	0	0	0	0	0
Las Vegas	6.274237398987736	4.383821222036865	0.5565378291550481	36.119556	-115.173336	Galleria Bar	NV	3570 Las Vegas Blvd S Caesars Palace The Strip Las Vegas, NV 89109	3.8918202981106265	0.6931471805599453	0.0	1	2	0	1	0	2	0.0	0.0	0.0	1.0	0.0	0.0	0.0	0.0	1.0	0.0	0.0	0.0	0.0	0.0	0.0	0.0	0.0	0.0	0.0	0.0	0.0	0.0	0.0	0.0	0.0	0.0	0.0	0	0	0	1	0
Phoenix	13.107306598418447	16.792441393314757	10.725195849450447	33.56809929999999	-112.09886940000001	Cvs Pharmacy	AZ	1850 W Dunlap Avenue Phoenix, AZ 85021	3.7612001156935624	1.0986122886681098	0.0	0	2	0	1	1	0	0.0	0.0	0.0	0.0	0.0	0.0	0.0	0.0	1.0	0.0	0.0	0.0	0.0	0.0	0.0	0.0	0.0	0.0	1.0	0.0	0.0	0.0	0.0	0.0	0.0	0.0	0.0	0	0	0	0	0
Las Vegas	1.9671455317069606	7.541204366517081	4.898653286143896	36.156983600000004	-115.1535533	Buffalo Exchange	NV	1209 S Main St Downtown Las Vegas, NV 89104	4.709530201312334	2.1972245773362196	0.0	0	2	0	1	1	0	0.0	0.0	0.0	0.0	0.0	0.0	0.0	0.0	1.0	0.0	0.0	0.0	0.0	0.0	0.0	0.0	1.0	0.0	0.0	0.0	0.0	0.0	0.0	0.0	0.0	0.0	0.0	0	0	0	0	0
Charlotte	1.6448773486423305	25.771784945868205	1.8525364752599438	35.213825	-80.8263489	Customshop Handcrafted Food	NC	1601 Elizabeth Ave Elizabeth Charlotte, NC 28204	5.288267030694535	2.995732273553991	0.0	0	1	0	1	2	0	0.0	1.0	0.0	1.0	0.0	0.0	1.0	0.0	1.0	1.0	0.0	0.0	0.0	0.0	1.0	0.0	1.0	0.0	0.0	0.0	0.0	0.0	0.0	0.0	0.0	0.0	0.0	1	0	0	0	0
Las Vegas	17.157145398927693	8.702149032068965	11.07187346228215	36.0152797	-115.17171200000001	Rodolfo Barbosa, DMD	NV	Healthy Smiles 9620 S Las Vegas Blvd , Ste E14 Southeast Las Vegas, NV 89123	0.0	0.0	0.0	0	2	0	1	0	0	0.0	0.0	0.0	0.0	0.0	0.0	0.0	0.0	0.0	0.0	0.0	0.0	0.0	0.0	0.0	0.0	0.0	0.0	0.0	0.0	0.0	0.0	0.0	0.0	0.0	0.0	0.0	0	0	0	0	0
Madison	4.93449414752764	4.096196284194253	5.555069349935828	43.107164000000004	-89.351047	Tip Top Tavern	WI	601 N North St Eken Park Madison, WI 53704	4.6443908991413725	2.0794415416798357	0.0	0	1	0	0	1	1	0.0	1.0	0.0	1.0	1.0	0.0	1.0	0.0	0.0	0.0	1.0	0.0	0.0	0.0	1.0	0.0	1.0	0.0	0.0	0.0	0.0	0.0	0.0	0.0	0.0	0.0	0.0	1	0	0	1	0
Phoenix	6.092523650903988	8.021752513872755	3.3210453022901114	33.501658899999995	-112.04725	Hot Rod Grill	AZ	4433 N 16th St Phoenix, AZ 85016	0.0	0.0	0.0	0	2	0	1	0	0	0.0	0.0	0.0	0.0	0.0	0.0	0.0	0.0	1.0	0.0	0.0	0.0	0.0	0.0	0.0	0.0	0.0	0.0	1.0	0.0	0.0	0.0	0.0	0.0	0.0	0.0	0.0	0	0	0	0	0
Phoenix	22.508139562338446	22.44830342885485	19.71748104647436	33.6384005	-111.9795246	Danky's Bar-B-Q	AZ	4727 E Bell Rd Ste 31 Phoenix, AZ 85032	4.700480365792417	1.791759469228055	0.0	0	1	0	1	0	0	0.0	0.0	0.0	1.0	1.0	1.0	0.0	1.0	1.0	1.0	0.0	0.0	0.0	0.0	1.0	0.0	0.0	0.0	1.0	0.0	0.0	0.0	0.0	0.0	0.0	0.0	0.0	1	0	0	0	0
Las Vegas	12.138178452198689	5.279736395220945	5.580239820448448	36.068425	-115.193798	Blackwood Cinema	NV	3750 Las Vegas Blvd Las Vegas, NV 89158	0.0	0.0	0.0	0	2	0	1	0	0	0.0	0.0	0.0	0.0	0.0	0.0	0.0	0.0	0.0	0.0	0.0	0.0	0.0	0.0	0.0	0.0	0.0	0.0	0.0	0.0	0.0	0.0	0.0	0.0	0.0	0.0	0.0	0	0	0	0	0
Phoenix	8.881608291315525	5.187150939498023	10.602718074488918	33.390792	-112.012504	Morning Glory Cafe	AZ	6106 S 32nd St Phoenix, AZ 85042	6.054439346269371	3.713572066704308	0.6931471805599453	0	2	0	1	1	0	0.0	1.0	0.0	1.0	0.0	0.0	1.0	1.0	1.0	0.0	0.0	0.0	0.0	0.0	0.0	0.0	0.0	0.0	1.0	0.0	0.0	0.0	0.0	0.0	0.0	0.0	0.0	1	1	0	0	0
Las Vegas	6.471934897844118	8.055701439050432	4.20856541095901	36.1435825	-115.20141559999999	Rani's World Foods	NV	4505 W Sahara Ave Westside Las Vegas, NV 89102	5.5134287461649825	3.295836866004329	0.0	0	2	0	0	0	0	0.0	0.0	0.0	1.0	1.0	1.0	0.0	1.0	1.0	0.0	0.0	0.0	0.0	0.0	1.0	0.0	0.0	0.0	1.0	0.0	0.0	0.0	0.0	0.0	0.0	0.0	0.0	1	0	0	0	0
Las Vegas	19.312269595603894	25.88437910047991	22.152074784143593	36.2915027	-115.28582949999999	Massage Envy - Centennial Hills	NV	7140 N. Durango Drive #140 Centennial Las Vegas, NV 89149	5.342334251964811	2.1972245773362196	0.6931471805599453	0	2	0	1	1	0	0.0	0.0	0.0	0.0	0.0	0.0	0.0	0.0	1.0	0.0	0.0	0.0	0.0	0.0	0.0	0.0	0.0	0.0	1.0	0.0	0.0	0.0	0.0	0.0	0.0	0.0	0.0	0	0	0	0	0
Charlotte	2.319803197762386	25.0650412623864	1.4142163475377967	35.2125537	-80.8185878	The Philosophers Stone Tavern	NC	1958 E 7th St Elizabeth Charlotte, NC 28204	5.808142489980444	3.2188758248682006	0.0	1	1	0	0	1	1	0.0	1.0	0.0	1.0	1.0	0.0	1.0	0.0	1.0	0.0	0.0	0.0	0.0	0.0	1.0	0.0	0.0	0.0	1.0	0.0	0.0	0.0	0.0	0.0	0.0	0.0	0.0	1	0	0	1	0
Phoenix	1.1678229051194604	7.579407445149414	3.0627247543800054	33.4547647	-112.08651709999998	Paisley Violin	AZ	1030 NW Grand Ave Phoenix, AZ 85007	3.1354942159291497	1.6094379124341003	0.0	0	1	0	0	0	0	1.0	1.0	0.0	1.0	0.0	1.0	1.0	0.0	1.0	1.0	0.0	0.0	0.0	0.0	1.0	0.0	1.0	0.0	0.0	0.0	0.0	0.0	0.0	0.0	0.0	0.0	0.0	1	0	0	0	0
Las Vegas	6.172056084803581	3.6778710461324797	5.098309334059271	36.114313	-115.1139813	Flamingo Pet Clinic	NV	2675 E Flamingo Rd Ste 1 Eastside Las Vegas, NV 89121	3.7376696182833684	1.6094379124341003	0.0	0	2	0	1	0	0	0.0	0.0	0.0	0.0	0.0	0.0	0.0	0.0	0.0	0.0	0.0	0.0	0.0	0.0	0.0	0.0	0.0	0.0	0.0	0.0	0.0	0.0	0.0	0.0	0.0	0.0	0.0	0	0	0	0	0
Madison	0.7500851140882577	8.146874149552843	1.5850889905050296	43.0768864	-89.38389740000001	Hamilton's On The Square	WI	101 N Hamilton St Capitol Madison, WI 53703	3.332204510175204	0.6931471805599453	0.0	0	1	0	1	1	0	0.0	1.0	0.0	1.0	0.0	0.0	1.0	0.0	1.0	1.0	0.0	0.0	0.0	0.0	0.0	0.0	1.0	0.0	0.0	0.0	0.0	0.0	0.0	0.0	0.0	0.0	0.0	1	0	0	0	0
Pittsburgh	5.87333282691236	25.000787345379234	37.57154985229503	40.451832	-79.932424	Anna Skin Care	PA	5541 Walnut St Shadyside Pittsburgh, PA 15232	2.772588722239781	0.0	0.0	0	2	0	1	1	0	0.0	0.0	0.0	0.0	0.0	0.0	0.0	0.0	1.0	0.0	0.0	0.0	0.0	0.0	0.0	0.0	1.0	0.0	0.0	0.0	0.0	0.0	0.0	0.0	0.0	0.0	0.0	0	0	0	0	0
Madison	11.656281035790133	19.74723992697458	10.957789249524906	43.0164963	-89.511545	Muir Field Pet Clinic	WI	3175 Muir Field Rd Westhaven Trails Madison, WI 53719	0.0	0.0	0.0	0	2	0	1	0	0	0.0	0.0	0.0	0.0	0.0	0.0	0.0	0.0	0.0	0.0	0.0	0.0	0.0	0.0	0.0	0.0	0.0	0.0	0.0	0.0	0.0	0.0	0.0	0.0	0.0	0.0	0.0	0	0	0	0	0
Phoenix	19.804593776133643	23.704892125012037	17.568331271331076	33.6232445	-112.1336723	Del Taco	AZ	15229 N 35th Ave Phoenix, AZ 85053	3.4339872044851463	1.6094379124341003	0.0	0	2	0	1	0	0	0.0	0.0	0.0	1.0	0.0	0.0	0.0	1.0	1.0	0.0	0.0	0.0	0.0	0.0	1.0	0.0	0.0	0.0	0.0	0.0	0.0	0.0	0.0	0.0	0.0	0.0	0.0	1	0	0	0	0
Phoenix	18.413203408985265	19.147295146939324	15.61244455175179	33.609922999999995	-112.01448899999998	FastMed Urgent Care	AZ	3131 E Thunderbird Road Suite A Phoenix, AZ 85302	3.1780538303479458	0.0	0.0	0	2	0	1	0	0	0.0	0.0	0.0	0.0	0.0	0.0	0.0	0.0	0.0	0.0	0.0	0.0	0.0	0.0	0.0	0.0	0.0	0.0	0.0	0.0	0.0	0.0	0.0	0.0	0.0	0.0	0.0	0	0	0	0	0
Phoenix	22.487092752629223	24.680251415273062	19.818602758374	33.6543385	-112.0667308	Tammy's La Nails	AZ	18440 N 7th St Phoenix, AZ 85022	2.8903717578961645	1.6094379124341003	0.0	0	2	0	1	0	0	0.0	0.0	0.0	0.0	0.0	0.0	0.0	0.0	1.0	0.0	0.0	0.0	0.0	0.0	0.0	0.0	0.0	0.0	1.0	0.0	0.0	0.0	0.0	0.0	0.0	0.0	0.0	0	0	0	0	0
Las Vegas	12.034525419346553	6.321543672773089	5.513487677320064	36.0768636	-115.2097623	Elite Transportation	NV	5041 Sobb Ave Las Vegas, NV 89118	2.0794415416798357	1.3862943611198906	0.0	0	2	0	1	0	0	0.0	0.0	0.0	0.0	0.0	0.0	0.0	0.0	1.0	0.0	0.0	0.0	0.0	0.0	0.0	0.0	0.0	0.0	0.0	0.0	0.0	0.0	0.0	0.0	0.0	0.0	0.0	0	0	0	0	0
Las Vegas	13.858992989483003	17.835307207153647	13.992645206226136	36.201637	-115.2836612	Smith's Food & Drug Centers	NV	2211 N Rampart Blvd Summerlin Las Vegas, NV 89128	6.594413459749778	3.58351893845611	0.6931471805599453	0	2	0	1	1	0	0.0	0.0	0.0	0.0	0.0	0.0	0.0	0.0	1.0	0.0	0.0	0.0	0.0	0.0	0.0	0.0	0.0	0.0	1.0	0.0	0.0	0.0	0.0	0.0	0.0	0.0	0.0	0	0	0	0	0
Phoenix	6.036108224025009	3.202003888162699	5.050957019223451	33.4660406	-112.0118669	Maid 4 It All	AZ	Phoenix, AZ 85008	0.0	0.0	0.0	0	2	0	1	0	0	0.0	0.0	0.0	0.0	0.0	0.0	0.0	0.0	1.0	0.0	0.0	0.0	0.0	0.0	0.0	0.0	0.0	0.0	0.0	0.0	0.0	0.0	0.0	0.0	0.0	0.0	0.0	0	0	0	0	0
Las Vegas	8.392878995928282	5.773242993648213	2.614777427074123	36.11192570000001	-115.19938529999999	Trophies Of Las Vegas	NV	4295 S Arville St Las Vegas, NV 89103	1.6094379124341003	0.6931471805599453	0.0	0	2	0	1	0	0	0.0	0.0	0.0	0.0	0.0	0.0	0.0	0.0	1.0	0.0	0.0	0.0	0.0	0.0	0.0	0.0	0.0	0.0	0.0	0.0	0.0	0.0	0.0	0.0	0.0	0.0	0.0	0	0	0	0	0
Phoenix	11.835832286020516	16.24577717615703	9.749961900843896	33.5527709	-112.11536720000001	VCA Northern Animal Hospital	AZ	2611 W Northern Ave Phoenix, AZ 85051	2.833213344056216	0.6931471805599453	0.0	0	2	0	1	0	0	0.0	0.0	0.0	0.0	0.0	0.0	0.0	0.0	0.0	0.0	0.0	0.0	0.0	0.0	0.0	0.0	0.0	0.0	0.0	0.0	0.0	0.0	0.0	0.0	0.0	0.0	0.0	0	0	0	0	0
Las Vegas	10.321094902773742	15.409950257963008	11.60220148524697	36.2022020076249	-115.24185463786101	Cilantro Tacos	NV	2300 N Rainbow Blvd Ste 108 Las Vegas, NV 89108	5.863631175598097	3.295836866004329	0.6931471805599453	0	0	0	0	0	0	1.0	0.0	0.0	1.0	1.0	1.0	1.0	1.0	1.0	0.0	0.0	0.0	0.0	0.0	1.0	0.0	0.0	0.0	1.0	0.0	0.0	0.0	0.0	0.0	0.0	0.0	0.0	1	0	0	0	1
Las Vegas	0.5196094907635235	9.103357544877936	6.985197074951559	36.1716940650034	-115.13671875	Chi-Town Hustler	NV	Downtown Las Vegas, NV	3.1354942159291497	1.6094379124341003	0.0	0	2	0	1	0	0	0.0	0.0	0.0	0.0	0.0	0.0	0.0	0.0	1.0	0.0	0.0	0.0	0.0	0.0	0.0	0.0	0.0	0.0	0.0	0.0	0.0	0.0	0.0	0.0	0.0	0.0	0.0	0	0	0	0	0
Las Vegas	3.8232159824968406	7.611504700739991	4.214567659674444	36.15292	-115.174324	True Foods	NV	2408 Karli Dr Las Vegas, NV 89102	0.0	0.0	0.0	0	2	0	1	0	0	0.0	0.0	0.0	0.0	0.0	0.0	0.0	0.0	0.0	0.0	0.0	0.0	0.0	0.0	0.0	0.0	0.0	0.0	0.0	0.0	0.0	0.0	0.0	0.0	0.0	0.0	0.0	0	0	0	0	0
Las Vegas	6.930442939850231	3.6271252977512725	0.3742754285770696	36.111721	-115.17120700000001	JJ's Boulangerie	NV	Paris Las Vegas 3655 Las Vegas Blvd S The Strip Las Vegas, NV 89109	5.680172609017068	3.091042453358316	0.0	0	2	0	1	1	0	0.0	0.0	0.0	1.0	0.0	0.0	0.0	1.0	1.0	0.0	0.0	0.0	0.0	0.0	1.0	0.0	0.0	0.0	0.0	1.0	0.0	0.0	0.0	0.0	0.0	0.0	0.0	1	0	0	0	0
Phoenix	9.216087030163008	6.639884984286394	7.2883174550112395	33.4954282	-111.99018999999998	Arcadia Dentistry	AZ	4214 E Indian School Rd Ste 102 Phoenix, AZ 85018	1.9459101490553132	1.0986122886681098	0.0	0	2	0	1	0	0	0.0	0.0	0.0	0.0	0.0	0.0	0.0	0.0	0.0	0.0	0.0	0.0	0.0	0.0	0.0	0.0	0.0	0.0	0.0	0.0	0.0	0.0	0.0	0.0	0.0	0.0	0.0	0	0	0	0	0
Phoenix	22.768428945593744	25.668889475760242	20.241490927884925	33.656005	-112.09836000000001	Subway	AZ	18631 N 19th Ave Ste 142 Phoenix, AZ 85027	3.6109179126442243	1.3862943611198906	0.0	2	2	0	1	0	0	0.0	0.0	0.0	1.0	0.0	0.0	0.0	1.0	1.0	0.0	0.0	0.0	0.0	0.0	1.0	0.0	0.0	0.0	0.0	0.0	0.0	0.0	0.0	0.0	0.0	0.0	0.0	1	1	1	0	0
Phoenix	7.407512174415645	8.43702149465073	4.689000630925593	33.509848	-112.035296	Kinesis Konnection	AZ	2196 E Camelback Rd Ste 200 Phoenix, AZ 85016	1.9459101490553132	0.0	0.0	0	2	0	1	0	0	0.0	0.0	0.0	0.0	0.0	0.0	0.0	1.0	0.0	0.0	0.0	0.0	0.0	0.0	0.0	0.0	0.0	0.0	0.0	0.0	0.0	0.0	0.0	0.0	0.0	0.0	0.0	0	0	0	0	0
Phoenix	17.19595403982531	16.448629153900708	14.485469658359628	33.5834251	-111.9768837	Starbucks	AZ	10625 N Tatum Blvd Ste 104 Phoenix, AZ 85028	5.762051382780177	1.791759469228055	0.0	0	2	0	0	0	0	0.0	1.0	0.0	0.0	0.0	0.0	0.0	0.0	1.0	0.0	0.0	0.0	0.0	0.0	0.0	0.0	0.0	0.0	1.0	0.0	0.0	0.0	0.0	0.0	0.0	0.0	0.0	0	0	0	0	0
Las Vegas	6.421088941989308	4.656813480515742	6.234056199732529	36.1163253	-115.10137579999999	The Ritz of Las Vegas	NV	3360 E Flamingo Rd Eastside Las Vegas, NV 89121	2.5649493574615367	0.6931471805599453	0.0	0	2	0	1	0	0	0.0	0.0	0.0	0.0	0.0	0.0	0.0	0.0	1.0	0.0	0.0	0.0	0.0	0.0	0.0	0.0	0.0	0.0	0.0	0.0	0.0	0.0	0.0	0.0	0.0	0.0	0.0	0	0	0	0	0
Las Vegas	15.829938160945819	7.452187269786475	9.692282434474896	36.0277338	-115.17316890000001	Putter's Bar & Grill	NV	8945 S Las Vegas Blvd Southeast Las Vegas, NV 89123	3.912023005428146	2.4849066497880004	0.0	0	1	0	0	0	0	0.0	0.0	0.0	1.0	1.0	0.0	1.0	0.0	1.0	0.0	1.0	0.0	0.0	0.0	1.0	0.0	0.0	0.0	1.0	0.0	0.0	0.0	0.0	0.0	0.0	0.0	0.0	1	1	0	1	1
Las Vegas	11.54130346279479	5.302504774065814	8.964508638627905	36.0707245178936	-115.08738549085301	7-Eleven	NV	3995 E Sunset Rd Las Vegas, NV 89120	3.1354942159291497	0.6931471805599453	0.0	0	2	0	1	0	0	0.0	0.0	0.0	0.0	0.0	0.0	0.0	0.0	1.0	0.0	0.0	0.0	0.0	0.0	0.0	0.0	0.0	0.0	1.0	0.0	0.0	0.0	0.0	0.0	0.0	0.0	0.0	0	0	0	0	0
Las Vegas	5.383370467497122	4.9144782995435685	1.374453887504018	36.127436652968996	-115.170047641007	Starbucks	NV	Fashion Show Mall 3200 Las Vegas Blvd The Strip Las Vegas, NV 89109	6.052089168924417	2.70805020110221	0.0	0	2	0	0	1	0	0.0	1.0	0.0	0.0	0.0	0.0	0.0	0.0	1.0	0.0	0.0	0.0	0.0	0.0	0.0	0.0	0.0	0.0	0.0	1.0	0.0	0.0	0.0	0.0	0.0	0.0	0.0	0	0	0	0	0
Phoenix	6.309427829658391	12.603856371899047	6.370958333447542	33.480084999999995	-112.13332	Burger Shoppe	AZ	3423 W Thomas Rd Phoenix, AZ 85009	4.820281565605037	2.995732273553991	0.0	0	2	0	1	0	0	0.0	0.0	1.0	1.0	1.0	0.0	0.0	1.0	1.0	0.0	0.0	0.0	0.0	0.0	1.0	0.0	0.0	0.0	1.0	0.0	0.0	0.0	0.0	0.0	0.0	0.0	0.0	1	0	0	0	0
Las Vegas	4.980089164953793	5.419019957653196	6.028756032336792	36.129208	-115.105944	Autozone	NV	3185 E Desert Inn Rd Eastside Las Vegas, NV 89121	2.70805020110221	1.0986122886681098	0.0	0	2	0	1	0	0	0.0	0.0	0.0	0.0	0.0	0.0	0.0	0.0	0.0	0.0	0.0	0.0	0.0	0.0	0.0	0.0	0.0	0.0	0.0	0.0	0.0	0.0	0.0	0.0	0.0	0.0	0.0	0	0	0	0	0
Madison	7.203700826279407	14.977297810832935	6.425003338805911	43.0499179	-89.4743074	KLC Nails & Spa	WI	5509 Odana Rd Madison, WI 53719	2.5649493574615367	1.0986122886681098	0.0	0	2	0	1	1	0	0.0	0.0	0.0	0.0	0.0	0.0	0.0	0.0	1.0	0.0	0.0	0.0	0.0	0.0	0.0	0.0	0.0	0.0	1.0	0.0	0.0	0.0	0.0	0.0	0.0	0.0	0.0	0	0	0	0	0
Madison	1.3646353837397995	9.921043283755084	0.8480209940699907	43.067588799999996	-89.40616390000001	Franco Shoe Repair	WI	1213 Regent St Greenbush Madison, WI 53715	1.6094379124341003	0.0	0.0	0	2	0	1	0	0	0.0	0.0	0.0	0.0	0.0	0.0	0.0	0.0	0.0	0.0	0.0	0.0	0.0	0.0	0.0	0.0	0.0	0.0	0.0	0.0	0.0	0.0	0.0	0.0	0.0	0.0	0.0	0	0	0	0	0
Charlotte	16.08104497124517	23.63238932415457	13.478789758567842	35.078798600000006	-80.8179016	Domino's Pizza	NC	6420 Rea Rd B1 Charlotte, NC 28277	0.0	0.6931471805599453	0.0	0	2	0	1	1	0	1.0	0.0	0.0	1.0	0.0	0.0	0.0	1.0	1.0	0.0	0.0	0.0	0.0	0.0	1.0	0.0	0.0	0.0	0.0	0.0	0.0	0.0	0.0	0.0	0.0	0.0	0.0	1	1	0	0	1
Phoenix	4.469490512496234	8.051970141952117	1.7370883692383077	33.491312	-112.06567	Independent Automotive Services	AZ	3800 N 7th St Phoenix, AZ 85014	2.772588722239781	0.6931471805599453	0.0	0	2	0	1	0	0	0.0	0.0	0.0	0.0	0.0	0.0	0.0	0.0	0.0	0.0	0.0	0.0	0.0	0.0	0.0	0.0	0.0	0.0	0.0	0.0	0.0	0.0	0.0	0.0	0.0	0.0	0.0	0	0	0	0	0
Pittsburgh	5.029584419255905	24.445150450454804	38.36631151406527	40.452718	-79.9428609	Meyers Management	PA	5 Bayard Rd Fl 1 Shadyside Pittsburgh, PA 15213	0.0	0.0	0.0	0	2	0	1	0	0	0.0	0.0	0.0	0.0	0.0	0.0	0.0	0.0	1.0	0.0	0.0	0.0	0.0	0.0	0.0	0.0	0.0	0.0	0.0	0.0	0.0	0.0	0.0	0.0	0.0	0.0	0.0	0	0	0	0	0
Phoenix	16.784594996409805	13.065129956058676	18.739421644689685	33.321483799999996	-111.98258510000001	Bartoll Cleaners & Laundry	AZ	4722 E Ray Rd Phoenix, AZ 85044	0.0	0.6931471805599453	0.0	0	2	0	1	2	0	0.0	0.0	0.0	0.0	0.0	0.0	0.0	0.0	1.0	0.0	0.0	0.0	0.0	0.0	0.0	0.0	0.0	0.0	0.0	0.0	0.0	0.0	0.0	0.0	0.0	0.0	0.0	0	0	0	0	0
Las Vegas	15.02776916348657	9.716147111337945	8.711405866039133	36.064618700000004	-115.24472469999999	Babies R US	NV	7020 Arroyo Crossing Pkwy Spring Valley Las Vegas, NV 89113	5.998936561946683	2.70805020110221	0.6931471805599453	0	2	0	1	1	0	0.0	0.0	0.0	0.0	0.0	0.0	0.0	0.0	1.0	0.0	0.0	0.0	0.0	0.0	0.0	0.0	0.0	0.0	1.0	0.0	0.0	0.0	0.0	0.0	0.0	0.0	0.0	0	0	0	0	0
Pittsburgh	1.0382290092006783	19.360191435074167	41.83795530725486	40.4330076	-80.0045618	Disanto Pizza	PA	125 W Station Square Dr South Side Pittsburgh, PA 15219	0.0	0.0	0.0	0	2	0	1	0	0	0.0	0.0	0.0	0.0	0.0	0.0	0.0	1.0	1.0	0.0	0.0	0.0	0.0	0.0	0.0	0.0	0.0	0.0	0.0	0.0	0.0	0.0	0.0	0.0	0.0	0.0	0.0	1	0	0	0	1
Las Vegas	9.263873573237852	8.699442892488763	5.184040305660628	36.127385700000005	-115.2261443	The UPS Store	NV	3395 S Jones Blvd Chinatown Las Vegas, NV 89146	3.1354942159291497	0.0	0.0	0	2	0	1	0	0	0.0	0.0	0.0	0.0	0.0	0.0	0.0	0.0	1.0	0.0	0.0	0.0	0.0	0.0	0.0	0.0	0.0	0.0	0.0	0.0	0.0	0.0	0.0	0.0	0.0	0.0	0.0	0	0	0	0	0
Las Vegas	5.4723414899768725	5.130442160941404	1.475559485441492	36.128213	-115.17299799999999	Haagen Dazs Shop	NV	3200 Las Vegas Boulevard, South Fashion Show Mall - Located in the Food Court The Strip Las Vegas, NV 89109	2.0794415416798357	0.0	0.0	0	2	0	1	1	0	0.0	0.0	0.0	0.0	0.0	0.0	0.0	0.0	1.0	0.0	0.0	0.0	0.0	0.0	0.0	0.0	0.0	0.0	0.0	0.0	0.0	0.0	0.0	0.0	0.0	0.0	0.0	0	0	0	0	0
Las Vegas	13.756717632271105	13.063191154207638	9.8820523870777	36.125528	-115.27960800000001	McDonald's	NV	8635 Spring Mountain Rd Spring Valley Las Vegas, NV 89117	5.093750200806762	2.70805020110221	0.0	0	2	0	0	0	0	0.0	1.0	1.0	1.0	0.0	0.0	0.0	1.0	1.0	0.0	0.0	0.0	0.0	0.0	1.0	0.0	0.0	0.0	0.0	0.0	0.0	0.0	0.0	0.0	0.0	0.0	0.0	1	0	1	0	0
Phoenix	3.412217417492681	7.198295058279564	0.6302754383961234	33.481336999999996	-112.064652	Phoenix Country Club	AZ	2901 N 7th St Phoenix, AZ 85014	5.54907608489522	2.995732273553991	0.0	0	2	0	1	0	0	0.0	0.0	0.0	0.0	0.0	0.0	0.0	1.0	0.0	0.0	0.0	0.0	0.0	0.0	0.0	0.0	0.0	0.0	0.0	0.0	0.0	0.0	0.0	0.0	0.0	0.0	0.0	0	0	0	0	0
Las Vegas	7.483417256680794	3.4892290249695495	0.9206696992474919	36.1071424	-115.17366650000001	Sports Bar - At Aria Resort & Casino	NV	3730 S Las Vegas Blvd The Strip Las Vegas, NV 89109	2.0794415416798357	0.6931471805599453	0.0	0	1	0	1	1	0	0.0	0.0	0.0	0.0	1.0	0.0	0.0	0.0	1.0	0.0	0.0	0.0	0.0	0.0	0.0	0.0	0.0	0.0	0.0	0.0	0.0	0.0	0.0	0.0	0.0	0.0	0.0	0	0	0	1	0
Charlotte	9.339768839588176	33.36394578037668	12.332555536133524	35.3055101	-80.85807740000001	Cvs Pharmacy	NC	5100 Beatties Ford Rd Charlotte, NC 28216	2.6390573296152584	0.0	0.0	0	2	0	1	0	0	0.0	0.0	0.0	0.0	0.0	0.0	0.0	0.0	1.0	0.0	0.0	0.0	0.0	0.0	0.0	0.0	0.0	0.0	0.0	0.0	0.0	0.0	0.0	0.0	0.0	0.0	0.0	0	0	0	0	0
Edinburgh	1.3874630293527574	9.399224282123908	0.6267021297754709	55.949674800000004	-3.2095425	Sainsbury's Local	EDH	32 - 36 Shandwick Place West End Edinburgh EH2 4RT	4.174387269895637	1.0986122886681098	0.0	0	2	0	1	1	0	0.0	0.0	0.0	0.0	0.0	0.0	0.0	0.0	1.0	0.0	0.0	0.0	0.0	0.0	0.0	0.0	0.0	0.0	0.0	0.0	0.0	0.0	0.0	0.0	0.0	0.0	0.0	0	0	0	0	0
Phoenix	26.17612145576117	25.131591011153226	23.44676611717482	33.6545361	-111.93040859999999	Republic Services	AZ	18500 N Allied Way Phoenix, AZ 85054	2.0794415416798357	0.0	0.0	0	2	0	1	0	0	0.0	0.0	0.0	0.0	0.0	0.0	0.0	0.0	0.0	0.0	0.0	0.0	0.0	0.0	0.0	0.0	0.0	0.0	0.0	0.0	0.0	0.0	0.0	0.0	0.0	0.0	0.0	0	0	0	0	0
Charlotte	0.4598133145089994	27.677105099797853	3.868242446279678	35.2264493	-80.8425319	Trade Restaurant and Bar	NC	132 E Trade St Uptown Charlotte, NC 28202	3.970291913552122	1.6094379124341003	0.0	2	1	0	0	1	0	0.0	0.0	0.0	1.0	1.0	0.0	1.0	0.0	1.0	1.0	0.0	0.0	0.0	0.0	1.0	0.0	1.0	1.0	0.0	1.0	0.0	0.0	0.0	0.0	0.0	0.0	0.0	1	0	0	0	0
Phoenix	24.005563400180982	25.036922839964834	21.221044743303832	33.662944200000005	-112.01823290000002	Boulder valley pools	AZ	Phoenix, AZ 85050	0.0	0.0	0.0	0	2	0	1	0	0	0.0	0.0	0.0	0.0	0.0	0.0	0.0	0.0	0.0	0.0	0.0	0.0	0.0	0.0	0.0	0.0	0.0	0.0	0.0	0.0	0.0	0.0	0.0	0.0	0.0	0.0	0.0	0	0	0	0	0
Las Vegas	6.265247374592331	10.412450945267913	6.649678799115437	36.1679972774372	-115.20522628326799	Community Cut's Barbershop	NV	415 S Decatur Blvd Westside Las Vegas, NV 89107	2.6390573296152584	0.6931471805599453	0.0	0	2	0	1	1	0	0.0	0.0	0.0	0.0	0.0	0.0	0.0	0.0	0.0	0.0	0.0	0.0	0.0	0.0	0.0	0.0	0.0	0.0	0.0	0.0	0.0	0.0	0.0	0.0	0.0	0.0	0.0	0	0	0	0	0
Pittsburgh	5.598335274206817	25.92600273289497	40.89677318920828	40.4788706	-79.95566600000001	Blue Moon	PA	5115 Butler St Lawrenceville Pittsburgh, PA 15201	3.7376696182833684	1.3862943611198906	0.0	1	1	0	1	0	2	0.0	1.0	0.0	1.0	1.0	0.0	0.0	0.0	1.0	0.0	1.0	0.0	0.0	0.0	0.0	0.0	0.0	0.0	0.0	0.0	0.0	0.0	0.0	0.0	0.0	0.0	0.0	0	0	0	1	0
Pittsburgh	9.62493095611605	25.696012071821073	32.72991952508855	40.4214972	-79.8901259	NCJW Home Consignments	PA	1913 Monongahela Ave Pittsburgh, PA 15218	1.3862943611198906	0.0	0.0	0	2	0	1	2	0	0.0	0.0	0.0	0.0	0.0	0.0	0.0	0.0	1.0	0.0	0.0	0.0	0.0	0.0	0.0	0.0	0.0	0.0	0.0	0.0	0.0	0.0	0.0	0.0	0.0	0.0	0.0	0	0	0	0	0
Phoenix	6.396155092856946	3.157644713529378	5.424788748982248	33.4658545	-112.00780400000001	SmartPractice	AZ	3400 E McDowell Rd Phoenix, AZ 85008	0.0	0.0	0.0	0	2	0	1	0	0	0.0	0.0	0.0	0.0	0.0	0.0	0.0	0.0	0.0	0.0	0.0	0.0	0.0	0.0	0.0	0.0	0.0	0.0	0.0	0.0	0.0	0.0	0.0	0.0	0.0	0.0	0.0	0	0	0	0	0
Las Vegas	11.27219093208716	16.115703994267832	12.284980533960185	36.2036169	-115.2525368	Courtesy Dental	NV	7310 Smoke Ranch Rd Ste F Las Vegas, NV 89128	2.70805020110221	0.0	0.0	0	2	0	1	0	0	0.0	0.0	0.0	0.0	0.0	0.0	0.0	0.0	0.0	0.0	0.0	0.0	0.0	0.0	0.0	0.0	0.0	0.0	0.0	0.0	0.0	0.0	0.0	0.0	0.0	0.0	0.0	0	0	0	0	0
Las Vegas	20.02429406910466	11.95526257031623	13.586161125169838	35.996348595856794	-115.207548693213	Pest Control Solutions, Inc	NV	10620 Southern Highlands Pkwy Ste 110 Southwest Las Vegas, NV 89141	0.0	0.0	0.0	0	2	0	1	0	0	0.0	0.0	0.0	0.0	0.0	0.0	0.0	0.0	1.0	0.0	0.0	0.0	0.0	0.0	0.0	0.0	0.0	0.0	0.0	0.0	0.0	0.0	0.0	0.0	0.0	0.0	0.0	0	0	0	0	0
Charlotte	18.294521916525643	15.840005984308098	14.924274347620504	35.0843329	-80.7314054	One-U Cuisine	NC	3022 Weddington Rd Charlotte, NC 28202	4.700480365792417	2.302585092994046	0.0	0	0	0	1	1	0	0.0	1.0	0.0	1.0	1.0	0.0	1.0	1.0	1.0	0.0	0.0	0.0	0.0	0.0	1.0	0.0	0.0	0.0	0.0	0.0	0.0	0.0	0.0	0.0	0.0	0.0	0.0	1	0	0	0	0
Las Vegas	6.274237398987736	4.383821222036865	0.5565378291550481	36.119556	-115.173336	Carina	NV	Appian Way Shops at Caesars Palace 3570 Las Vegas Blvd S The Strip Las Vegas, NV 89109	0.0	0.6931471805599453	0.0	0	2	0	1	2	0	0.0	0.0	0.0	0.0	0.0	0.0	0.0	0.0	1.0	0.0	0.0	0.0	0.0	0.0	0.0	0.0	0.0	0.0	0.0	0.0	0.0	0.0	0.0	0.0	0.0	0.0	0.0	0	0	0	0	0
Pittsburgh	0.5098577205295074	19.95119921592144	42.339483854045845	40.440551	-80.0061829	Stone Neapolitan Pizzeria	PA	300 Liberty Ave Ste 100 Downtown Pittsburgh, PA 15222	5.6240175061873385	2.5649493574615367	0.0	0	2	0	1	1	0	0.0	1.0	0.0	1.0	1.0	0.0	0.0	1.0	1.0	0.0	0.0	0.0	0.0	0.0	1.0	0.0	1.0	1.0	0.0	1.0	0.0	0.0	0.0	0.0	0.0	0.0	0.0	1	0	0	0	1
Charlotte	5.394707956243771	26.37871664370891	4.21136267073145	35.174229269220604	-80.84814190864559	The Flying Biscuit Cafe	NC	4241 Park Rd Charlotte, NC 28209	6.838405200847344	4.3694478524670215	0.6931471805599453	0	0	0	0	1	0	0.0	1.0	0.0	1.0	0.0	1.0	1.0	1.0	1.0	0.0	0.0	0.0	0.0	0.0	1.0	0.0	0.0	0.0	1.0	0.0	0.0	0.0	0.0	0.0	0.0	0.0	0.0	1	0	0	0	0
Phoenix	5.0310985329840126	9.646843913544227	2.895231326134179	33.4963635	-112.0839541	The Fry Bread House	AZ	4140 N 7th Ave Phoenix, AZ 85013	5.337538079701318	3.784189633918261	0.0	0	2	0	1	0	0	0.0	0.0	0.0	0.0	0.0	0.0	0.0	1.0	1.0	0.0	0.0	0.0	0.0	0.0	1.0	0.0	0.0	0.0	1.0	0.0	0.0	0.0	0.0	0.0	0.0	0.0	0.0	1	0	0	0	0
Charlotte	0.5444778926241014	27.755294506580313	3.957126180473669	35.2270869	-80.8431267	Ciao Italia!	NC	Uptown Charlotte, NC	0.0	0.0	0.0	0	2	0	1	0	0	0.0	0.0	0.0	0.0	0.0	0.0	0.0	1.0	0.0	0.0	0.0	0.0	0.0	0.0	0.0	0.0	0.0	0.0	0.0	0.0	0.0	0.0	0.0	0.0	0.0	0.0	0.0	0	0	0	0	0
Edinburgh	0.7651413769724091	9.953718253100378	0.34845280889020586	55.9516645	-3.2001844	Swarovski	EDH	100a Princes Street New Town Edinburgh EH2 3AA	0.0	0.0	0.0	0	2	0	1	1	0	0.0	0.0	0.0	0.0	0.0	0.0	0.0	0.0	1.0	0.0	0.0	0.0	0.0	0.0	0.0	0.0	0.0	0.0	0.0	0.0	0.0	0.0	0.0	0.0	0.0	0.0	0.0	0	0	0	0	0
Phoenix	4.4223851424913825	8.587157253069732	1.940108589651512	33.4915664792061	-112.073666229844	Toyowest Automotive	AZ	3831 N Central Ave Phoenix, AZ 85012	0.0	0.0	0.0	0	2	0	1	0	0	0.0	0.0	0.0	0.0	0.0	0.0	0.0	0.0	0.0	0.0	0.0	0.0	0.0	0.0	0.0	0.0	0.0	0.0	0.0	0.0	0.0	0.0	0.0	0.0	0.0	0.0	0.0	0	0	0	0	0
Las Vegas	8.599052416290537	6.9257771924186535	3.5470004431957434	36.1182771	-115.20979840000001	Metro Pizza	NV	4001 S Decatur Blvd Ste 39 Las Vegas, NV 89103	6.577861357721047	4.204692619390966	0.0	0	0	0	1	1	0	1.0	0.0	0.0	1.0	1.0	1.0	1.0	1.0	1.0	0.0	0.0	0.0	0.0	0.0	1.0	0.0	0.0	0.0	1.0	0.0	0.0	0.0	0.0	0.0	0.0	0.0	0.0	1	0	0	0	1
Las Vegas	16.64257780812247	17.86677616982236	14.346663887125393	36.159417	-115.32032099999999	McDonald's	NV	10290 W Charleston Blvd Summerlin Las Vegas, NV 89135	5.662960480135946	2.8903717578961645	0.0	1	2	0	0	0	0	0.0	0.0	1.0	1.0	0.0	0.0	0.0	1.0	1.0	0.0	0.0	0.0	0.0	0.0	1.0	0.0	0.0	0.0	1.0	0.0	0.0	0.0	0.0	0.0	0.0	0.0	0.0	1	0	1	0	0
Las Vegas	7.455235916602938	1.8026499198308656	4.3161875269753445	36.100344	-115.126227	Allstate Insurance: Moe Elousta	NV	1955 E Tropicana Ave, Ste 1 Eastside Las Vegas, NV 89119	0.0	0.0	0.0	0	2	0	1	0	0	0.0	0.0	0.0	0.0	0.0	0.0	0.0	0.0	0.0	0.0	0.0	0.0	0.0	0.0	0.0	0.0	0.0	0.0	0.0	0.0	0.0	0.0	0.0	0.0	0.0	0.0	0.0	0	0	0	0	0
Las Vegas	11.343222873201984	17.058361197715936	13.288739792806611	36.2187953	-115.2444007	Olive Garden Italian Restaurant	NV	6850 W. Cheyenne Ave. Northwest Las Vegas, NV 89108	6.51471269087253	3.9318256327243257	0.6931471805599453	0	1	0	1	1	0	0.0	0.0	0.0	1.0	0.0	1.0	1.0	1.0	1.0	1.0	1.0	0.0	0.0	0.0	1.0	0.0	0.0	0.0	1.0	0.0	0.0	0.0	0.0	0.0	0.0	0.0	0.0	1	0	0	1	0
Phoenix	22.298188242489914	22.63807176639562	19.497672433841174	33.641179799999996	-111.994258	Village Inn Restaurant	AZ	4040 E Bell Rd Phoenix, AZ 85032	3.6375861597263857	0.0	0.0	2	0	0	0	1	0	0.0	0.0	0.0	1.0	1.0	1.0	1.0	1.0	1.0	0.0	0.0	0.0	0.0	0.0	1.0	0.0	0.0	0.0	0.0	0.0	0.0	0.0	0.0	0.0	0.0	0.0	0.0	1	0	0	0	0
Edinburgh	0.8713640145504593	11.00446840236834	1.7002356758432808	55.96038050000001	-3.1825136	Emma Hall Hair Design	EDH	19a Haddington Place Leith Edinburgh EH7 4AF	3.4011973816621555	0.0	0.0	0	2	0	1	2	0	0.0	0.0	0.0	0.0	0.0	0.0	0.0	1.0	1.0	0.0	0.0	0.0	0.0	0.0	0.0	0.0	1.0	0.0	0.0	0.0	0.0	0.0	0.0	0.0	0.0	0.0	0.0	0	0	0	0	0
Las Vegas	18.05542777844097	14.266657186317003	12.453336604292675	36.0719073	-115.2982544	Aloha Pet Grooming	NV	6415 S Fort Apache Rd Ste 150 Spring Valley Las Vegas, NV 89148	3.091042453358316	2.1972245773362196	0.0	0	2	0	1	0	0	0.0	0.0	0.0	0.0	0.0	0.0	0.0	0.0	0.0	0.0	0.0	0.0	0.0	0.0	0.0	0.0	0.0	0.0	0.0	0.0	0.0	0.0	0.0	0.0	0.0	0.0	0.0	0	0	0	0	0
Madison	0.3268799837386311	8.977374176997854	0.6529359093353082	43.0728935	-89.39563559999999	Ian's Pizza By The Slice	WI	319 N Frances St Capitol Madison, WI 53703	5.459585514144159	2.9444389791664403	0.0	0	2	0	0	0	1	0.0	0.0	0.0	1.0	0.0	0.0	0.0	1.0	1.0	0.0	0.0	0.0	0.0	0.0	1.0	0.0	1.0	0.0	0.0	1.0	0.0	0.0	0.0	0.0	0.0	0.0	0.0	1	0	0	0	1
Charlotte	17.070180699027897	25.974555062565035	14.80661970108379	35.0686362	-80.8413615	Miro Spanish Grille	NC	12239 N Community House Rd Ste 102 Ballantyne Charlotte, NC 28277	4.718498871295094	1.9459101490553132	0.0	0	1	0	0	1	0	0.0	1.0	0.0	1.0	1.0	1.0	1.0	1.0	1.0	1.0	0.0	0.0	0.0	0.0	1.0	0.0	1.0	0.0	1.0	0.0	0.0	0.0	0.0	0.0	0.0	0.0	0.0	1	0	0	0	0
Las Vegas	9.191334689631658	2.943024610007021	2.7573223020940243	36.090367741464206	-115.17406197620599	PRESS at Four Seasons	NV	3960 Las Vegas Blvd The Strip Las Vegas, NV 89119	4.9344739331306915	1.791759469228055	0.0	2	1	0	0	1	0	0.0	1.0	0.0	1.0	1.0	1.0	1.0	0.0	1.0	0.0	1.0	0.0	0.0	0.0	1.0	0.0	0.0	0.0	0.0	0.0	0.0	0.0	0.0	0.0	0.0	0.0	1.0	1	0	0	1	0
Charlotte	7.759458456600788	23.910042024090675	5.239554794602638	35.153816	-80.82492490000001	Ruby Tuesday Restaurant	NC	Morrocroft Village 3904 Colony Rd South Park Charlotte, NC 28211	0.0	0.0	0.0	0	1	0	1	1	0	0.0	0.0	0.0	1.0	0.0	0.0	1.0	1.0	1.0	1.0	0.0	0.0	0.0	0.0	1.0	0.0	0.0	0.0	0.0	0.0	0.0	0.0	0.0	0.0	0.0	0.0	0.0	1	0	0	0	0
Las Vegas	15.200669636135535	10.190180950646328	8.986713352344221	36.0671343	-115.25104259999999	Simply Skin Las Vegas	NV	6670 S Tenaya Way Ste 190 Spring Valley Las Vegas, NV 89113	3.7376696182833684	1.9459101490553132	0.0	0	2	0	1	0	0	0.0	0.0	0.0	0.0	0.0	0.0	0.0	0.0	1.0	0.0	0.0	0.0	0.0	0.0	0.0	0.0	0.0	0.0	1.0	0.0	0.0	0.0	0.0	0.0	0.0	0.0	0.0	0	0	0	0	0
Edinburgh	0.4365892041254802	10.633403671994651	1.1854369466226382	55.957168200000005	-3.1885822	Siam Thani	EDH	14 Broughton Street New Town Edinburgh EH1 3RH	1.3862943611198906	0.6931471805599453	0.0	0	2	0	1	2	0	0.0	0.0	0.0	1.0	0.0	0.0	0.0	0.0	0.0	0.0	0.0	0.0	0.0	0.0	0.0	0.0	0.0	0.0	0.0	0.0	0.0	0.0	0.0	0.0	0.0	0.0	0.0	1	0	0	0	0
Phoenix	24.676582856964668	26.003001791011993	21.912920633171158	33.67106847428	-112.030189633369	Upper Crust Pizza Patio & Wine Bar	AZ	20235 N Cave Creek Rd Ste 111 Phoenix, AZ 85024	7.153833801578843	4.844187086458591	0.0	0	1	0	0	1	1	0.0	1.0	0.0	1.0	1.0	1.0	1.0	1.0	1.0	1.0	1.0	0.0	0.0	0.0	1.0	0.0	0.0	0.0	1.0	0.0	0.0	0.0	0.0	0.0	0.0	0.0	1.0	1	0	0	1	1
Las Vegas	6.603676130261351	11.733129014818546	11.710346726778175	36.1740385	-115.0627012	Brighton Dental	NV	5075 E. Bonanza Road Sunrise Las Vegas, NV 89110	0.0	0.0	0.0	0	2	0	1	0	0	0.0	0.0	0.0	0.0	0.0	0.0	0.0	0.0	0.0	0.0	0.0	0.0	0.0	0.0	0.0	0.0	0.0	0.0	0.0	0.0	0.0	0.0	0.0	0.0	0.0	0.0	0.0	0	0	0	0	0
Edinburgh	1.3885296031827479	9.669097861415429	0.5020172277087636	55.94589379999999	-3.206213	Henry's Cellar Bar	EDH	8-16 Morrison Street West End Edinburgh EH3 8BJ	2.772588722239781	0.6931471805599453	0.0	0	1	0	1	1	1	0.0	0.0	0.0	1.0	0.0	0.0	0.0	0.0	0.0	0.0	0.0	1.0	0.0	0.0	0.0	0.0	1.0	0.0	0.0	0.0	0.0	0.0	0.0	0.0	1.0	0.0	0.0	0	0	0	1	0
Las Vegas	2.9804556907245296	8.329189982695011	5.1725480305580716	36.161627	-115.16803	Internal Medicine Specialists	NV	2010 Goldring Ave Ste 100 Downtown Las Vegas, NV 89106	3.4011973816621555	0.0	0.0	0	2	0	1	0	0	0.0	0.0	0.0	0.0	0.0	0.0	0.0	0.0	0.0	0.0	0.0	0.0	0.0	0.0	0.0	0.0	0.0	0.0	0.0	0.0	0.0	0.0	0.0	0.0	0.0	0.0	0.0	0	0	0	0	0
Las Vegas	15.627140848970866	9.775217466530712	9.18601752722645	36.055414	-115.241332	BBQ Shak	NV	7320 S Rainbow Blvd Southwest Las Vegas, NV 89139	0.0	0.0	0.0	0	0	0	1	1	0	1.0	0.0	0.0	1.0	0.0	0.0	0.0	1.0	1.0	0.0	0.0	0.0	0.0	0.0	1.0	0.0	0.0	0.0	0.0	0.0	0.0	0.0	0.0	0.0	0.0	0.0	0.0	1	0	0	0	0
Las Vegas	7.2151506434666945	6.618053937766282	2.8615993140562535	36.127039	-115.19874899999999	Zuda Foot Massage	NV	3460 Arville St Chinatown Las Vegas, NV 89102	1.3862943611198906	1.0986122886681098	0.0	0	2	0	1	0	0	0.0	0.0	0.0	0.0	0.0	0.0	0.0	0.0	1.0	0.0	0.0	0.0	0.0	0.0	0.0	0.0	0.0	0.0	0.0	0.0	0.0	0.0	0.0	0.0	0.0	0.0	0.0	0	0	0	0	0
Edinburgh	1.5612961759779194	9.228595744427862	0.7959496696929786	55.9494902	-3.2123437000000004	The Melville Bar	EDH	23-25 William Street West End Edinburgh EH3 7NG	2.995732273553991	1.3862943611198906	0.0	0	0	0	1	1	0	0.0	0.0	0.0	1.0	1.0	0.0	0.0	0.0	1.0	0.0	0.0	0.0	0.0	0.0	0.0	0.0	0.0	0.0	0.0	0.0	0.0	0.0	0.0	0.0	0.0	0.0	0.0	0	0	0	1	0
Charlotte	11.033851400678515	33.20050629340405	13.692347205497544	35.321946018241604	-80.8395800146956	Charlotte Oktoberfest	NC	Nc Music Factory 1000 Nc Music Factory Blvd Derita Charlotte, NC 28206	5.081404364984463	0.6931471805599453	0.0	0	2	0	1	0	0	0.0	0.0	0.0	0.0	0.0	0.0	0.0	0.0	0.0	0.0	0.0	0.0	0.0	0.0	0.0	0.0	0.0	0.0	0.0	0.0	0.0	0.0	0.0	0.0	0.0	0.0	0.0	0	0	0	0	0
Phoenix	23.869953662757332	24.114676447597194	21.06981907928703	33.654127	-111.98723100000001	Arizona Hot Air Balloons	AZ	18423 N 43rd Pl Phoenix, AZ 85032	0.0	0.0	0.0	0	2	0	1	0	0	0.0	0.0	0.0	0.0	0.0	0.0	0.0	0.0	0.0	0.0	0.0	0.0	0.0	0.0	0.0	0.0	0.0	0.0	0.0	0.0	0.0	0.0	0.0	0.0	0.0	0.0	0.0	0	0	0	0	0
Pittsburgh	9.018221823026922	25.163024991897185	33.25681845505676	40.4213571	-79.8975426	Pub In the Park	PA	7034 Blackhawk St Pittsburgh, PA 15218	2.70805020110221	1.3862943611198906	0.0	2	1	0	1	0	1	0.0	0.0	0.0	1.0	1.0	0.0	0.0	0.0	1.0	0.0	1.0	0.0	0.0	0.0	0.0	0.0	0.0	0.0	0.0	0.0	0.0	0.0	0.0	0.0	0.0	1.0	0.0	0	0	0	1	0
Phoenix	8.493020353038943	10.391786619127645	5.693057244227782	33.524890899658196	-112.047637939453	Nene Unique Home and Gifts	AZ	6042 N 16th St Phoenix, AZ 85014	1.791759469228055	0.0	0.0	0	2	0	1	1	0	0.0	0.0	0.0	0.0	0.0	0.0	0.0	0.0	1.0	0.0	0.0	0.0	0.0	0.0	0.0	0.0	0.0	0.0	0.0	0.0	0.0	0.0	0.0	0.0	0.0	0.0	0.0	0	0	0	0	0
Pittsburgh	0.5549502188430889	20.85822652416092	41.66640278248586	40.444208700000004	-79.9946687	Bill's Bar & Burger	PA	Westin Convention Center 1001 Liberty Ave Downtown Pittsburgh, PA 15222	4.2626798770413155	1.6094379124341003	0.0	3	1	0	0	1	0	0.0	0.0	0.0	1.0	1.0	0.0	1.0	1.0	1.0	1.0	1.0	0.0	0.0	0.0	1.0	0.0	0.0	0.0	0.0	0.0	0.0	0.0	0.0	0.0	0.0	0.0	1.0	1	0	0	1	0
Madison	0.3755602045232239	8.966230109856149	0.5303636600592416	43.073547	-89.39692590000001	Madison Avenue	WI	624 University Ave Capitol Madison, WI 53774	0.0	0.0	0.0	0	2	0	1	0	0	0.0	0.0	0.0	0.0	0.0	0.0	0.0	0.0	0.0	0.0	0.0	0.0	0.0	0.0	0.0	0.0	0.0	0.0	0.0	0.0	0.0	0.0	0.0	0.0	0.0	0.0	0.0	0	0	0	1	0
Charlotte	0.882863229461599	27.117086415547067	3.631428465534428	35.228506	-80.834638	Enterprise Rent-A-Car	NC	325 E 9Th St First Ward Charlotte, NC 28202	2.4849066497880004	0.6931471805599453	0.0	0	2	0	1	0	0	0.0	0.0	0.0	0.0	0.0	0.0	0.0	0.0	0.0	0.0	0.0	0.0	0.0	0.0	0.0	0.0	0.0	0.0	0.0	0.0	0.0	0.0	0.0	0.0	0.0	0.0	0.0	0	0	0	0	0
Phoenix	15.09540322379462	19.164776924015293	12.88866832036385	33.5823910309502	-112.11985347791	In-N-Out Burger	AZ	2770 W Peoria Ave Phoenix, AZ 85029	6.511745329644728	4.060443010546419	0.6931471805599453	0	2	0	1	0	0	0.0	1.0	1.0	1.0	0.0	0.0	0.0	1.0	1.0	0.0	0.0	0.0	0.0	0.0	1.0	0.0	0.0	0.0	1.0	0.0	0.0	0.0	0.0	0.0	0.0	0.0	0.0	1	0	1	0	0
Las Vegas	9.22933009936511	6.179177276185933	8.838191400598038	36.100556	-115.07408400000001	Winchell's	NV	4580 E Tropicana Ave Eastside Las Vegas, NV 89121	5.123963979403259	2.1972245773362196	0.0	0	2	0	1	0	0	0.0	0.0	0.0	1.0	0.0	0.0	0.0	1.0	1.0	0.0	0.0	0.0	0.0	0.0	1.0	0.0	0.0	0.0	1.0	0.0	0.0	0.0	0.0	0.0	0.0	0.0	0.0	0	0	0	0	0
Phoenix	17.974977056490292	14.128948144072115	19.903042255556347	33.313096	-111.97438500000001	Velocity Technologies	AZ	14647 S 50th St Ste 185 Phoenix, AZ 85044	0.0	0.6931471805599453	0.0	0	2	0	1	0	0	0.0	0.0	0.0	0.0	0.0	0.0	0.0	0.0	1.0	0.0	0.0	0.0	0.0	0.0	0.0	0.0	0.0	0.0	0.0	0.0	0.0	0.0	0.0	0.0	0.0	0.0	0.0	0	0	0	0	0
Phoenix	5.361164207398862	3.292990501058566	4.401772047146939	33.465456	-112.019217	Carniceria Los Pinos	AZ	2903 E McDowell Rd Phoenix, AZ 85008	0.0	0.0	0.0	0	2	0	1	1	0	0.0	0.0	0.0	0.0	0.0	0.0	0.0	0.0	1.0	0.0	0.0	0.0	0.0	0.0	0.0	0.0	0.0	0.0	0.0	0.0	0.0	0.0	0.0	0.0	0.0	0.0	0.0	0	0	0	0	0
Las Vegas	7.456001711826069	3.337419238465508	0.9322775930330666	36.1067305	-115.1719754	Vintage Vegas Vapors	NV	3743 Las Vegas Blvd S The Strip Las Vegas, NV 89109	2.302585092994046	1.0986122886681098	0.0	0	2	0	1	1	0	0.0	0.0	0.0	0.0	0.0	0.0	0.0	0.0	1.0	0.0	0.0	0.0	0.0	0.0	0.0	0.0	0.0	0.0	0.0	0.0	0.0	0.0	0.0	0.0	0.0	0.0	0.0	0	0	0	0	0
Las Vegas	11.50408225277227	15.891056826126094	12.045430358960672	36.1973306	-115.25792849999999	Beauty Center	NV	7500 W Lake Mead Boulevard Las Vegas, NV 89128	2.4849066497880004	1.6094379124341003	0.0	0	2	0	1	2	0	0.0	0.0	0.0	0.0	0.0	0.0	0.0	0.0	1.0	0.0	0.0	0.0	0.0	0.0	0.0	0.0	0.0	0.0	0.0	0.0	0.0	0.0	0.0	0.0	0.0	0.0	0.0	0	0	0	0	0
Charlotte	12.504569610939171	26.79092166576316	13.344427310756053	35.309928899999996	-80.754271	Los Arcos	NC	8619 Jw Clay Blvd University City Charlotte, NC 28262	4.219507705176107	1.791759469228055	0.0	2	1	0	1	0	0	0.0	1.0	0.0	1.0	1.0	0.0	1.0	1.0	1.0	0.0	0.0	0.0	0.0	0.0	1.0	0.0	0.0	0.0	1.0	0.0	0.0	0.0	0.0	0.0	0.0	0.0	0.0	1	0	0	0	0
Las Vegas	6.158118038729267	9.385428264818527	5.583354528028718	36.157919	-115.203097	McDonald's	NV	4505 W Charleston Blvd Westside Las Vegas, NV 89102	3.044522437723423	0.6931471805599453	0.0	0	2	0	0	0	0	0.0	0.0	1.0	1.0	0.0	0.0	0.0	1.0	1.0	0.0	0.0	0.0	0.0	0.0	1.0	0.0	0.0	0.0	0.0	0.0	0.0	0.0	0.0	0.0	0.0	0.0	0.0	1	0	1	0	0
Charlotte	2.2247981818293026	26.88123576729065	2.7400991779289363	35.202646	-80.844436	Dolce Ristorante	NC	1710 Kenilworth Ave Ste 203 Dilworth Charlotte, NC 28203	4.700480365792417	2.4849066497880004	0.6931471805599453	0	1	0	1	1	0	0.0	1.0	0.0	1.0	0.0	0.0	1.0	0.0	1.0	1.0	0.0	0.0	0.0	0.0	1.0	0.0	0.0	0.0	1.0	0.0	0.0	0.0	0.0	0.0	0.0	0.0	0.0	1	0	0	0	0
Edinburgh	1.3198139176194037	11.23493384248969	1.3281766893163311	55.9419252	-3.1820324	Tikka Mahal	EDH	53 Clerk Street Newington Edinburgh EH8 9JQ	0.0	0.0	0.0	0	2	0	1	0	0	0.0	0.0	0.0	1.0	0.0	0.0	1.0	1.0	1.0	0.0	0.0	0.0	0.0	0.0	1.0	0.0	0.0	0.0	0.0	0.0	0.0	0.0	0.0	0.0	0.0	0.0	0.0	1	0	0	0	0
Las Vegas	1.9778563188281515	8.303535868340347	5.507941634924041	36.1634775	-115.15712350000001	Fuzziwig's Candy Factory	NV	775 S Grand Central Parkway Downtown Las Vegas, NV 89106	2.302585092994046	1.6094379124341003	0.0	0	2	0	1	1	0	0.0	0.0	0.0	0.0	0.0	0.0	0.0	0.0	1.0	0.0	0.0	0.0	0.0	0.0	0.0	0.0	0.0	0.0	0.0	0.0	0.0	0.0	0.0	0.0	0.0	0.0	0.0	0	0	0	0	0
Pittsburgh	6.610811558096043	24.413826106982178	35.93249951614636	40.43587670000001	-79.92286999999999	Pacific Ring	PA	1900 Murray Ave Squirrel Hill Pittsburgh, PA 15217	1.791759469228055	0.0	0.0	0	2	0	1	1	0	1.0	0.0	0.0	1.0	0.0	0.0	1.0	1.0	1.0	1.0	0.0	0.0	0.0	0.0	1.0	0.0	1.0	0.0	0.0	0.0	0.0	0.0	0.0	0.0	0.0	0.0	0.0	1	0	0	0	0
Las Vegas	3.551082854202887	11.762043668532815	9.011527915237659	36.195210100000004	-115.15446850000001	Las Vegas-Clark County Library System - West Las Vegas Library	NV	951 West Lake Mead Blvd Las Vegas, NV 89106	3.4011973816621555	1.0986122886681098	0.0	0	2	0	0	0	0	0.0	0.0	0.0	0.0	0.0	0.0	0.0	0.0	0.0	0.0	0.0	0.0	0.0	0.0	0.0	0.0	0.0	0.0	0.0	0.0	0.0	0.0	0.0	0.0	0.0	0.0	0.0	0	0	0	0	0
Las Vegas	3.319823966176983	5.988637711709742	3.289183775766474	36.1423378	-115.1563054	Sahara Hotel	NV	2535 Las Vegas Blvd S The Strip Las Vegas, NV 89109	5.476463551931511	3.6375861597263857	0.0	0	2	0	1	0	0	0.0	0.0	0.0	0.0	0.0	0.0	0.0	0.0	1.0	0.0	0.0	0.0	0.0	0.0	0.0	0.0	0.0	0.0	0.0	0.0	0.0	0.0	0.0	0.0	0.0	0.0	0.0	1	0	0	0	0
Charlotte	2.7884052022314014	24.76525726728083	2.3232754584519837	35.2209337	-80.8104316	Akahana Asian Bistro	NC	1308 The Plaza Plaza Midwood Charlotte, NC 28205	6.1070228877422545	4.007333185232471	0.6931471805599453	0	1	0	1	1	0	0.0	1.0	0.0	1.0	1.0	0.0	1.0	1.0	1.0	1.0	0.0	0.0	0.0	0.0	1.0	0.0	0.0	0.0	1.0	0.0	0.0	0.0	0.0	0.0	0.0	0.0	0.0	1	0	0	0	0
Pittsburgh	2.7003560175050656	20.658705605351237	39.28426817225144	40.4282626	-79.9739619	Mexico City	PA	2212 E Carson St South Side Pittsburgh, PA 15203	0.0	0.0	0.0	0	2	0	1	1	0	0.0	0.0	0.0	0.0	0.0	0.0	0.0	1.0	0.0	0.0	0.0	0.0	0.0	0.0	0.0	0.0	0.0	0.0	0.0	0.0	0.0	0.0	0.0	0.0	0.0	0.0	0.0	1	0	0	0	0
Phoenix	8.94088114558082	5.197592780690706	7.500896353374256	33.480007799999996	-111.98444440000002	Burlington Coat Factory	AZ	4525 E Thomas Rd Phoenix, AZ 85018	4.343805421853684	1.6094379124341003	0.0	0	2	0	1	1	0	0.0	0.0	0.0	0.0	0.0	0.0	0.0	0.0	1.0	0.0	0.0	0.0	0.0	0.0	0.0	0.0	0.0	0.0	1.0	0.0	0.0	0.0	0.0	0.0	0.0	0.0	0.0	0	0	0	0	0
Pittsburgh	1.2880766287565484	21.58696062781141	41.424106976231464	40.4486739	-79.98817	Real Luck Cafe	PA	1519 Penn Ave Strip District Pittsburgh, PA 15222	5.303304908059076	2.0794415416798357	0.0	1	1	0	1	0	2	0.0	1.0	0.0	1.0	1.0	0.0	0.0	0.0	0.0	0.0	1.0	1.0	0.0	0.0	0.0	0.0	1.0	0.0	0.0	0.0	0.0	0.0	0.0	0.0	0.0	1.0	0.0	0	0	0	1	0
Phoenix	10.320739958253737	12.198863139281604	7.532068302716299	33.54206	-112.047977	Wanda E O'Malley, CPA PLLC	AZ	7204 N 16th St Ste 110 Phoenix, AZ 85020	0.0	0.0	0.0	0	2	0	1	0	0	0.0	0.0	0.0	0.0	0.0	0.0	0.0	0.0	0.0	0.0	0.0	0.0	0.0	0.0	0.0	0.0	0.0	0.0	0.0	0.0	0.0	0.0	0.0	0.0	0.0	0.0	0.0	0	0	0	0	0
Phoenix	9.718643287813078	8.155197864976323	7.411743937831352	33.5103461	-111.9968077	Juby True	AZ	3912 E. Camelback Road Phoenix, AZ 85018	4.23410650459726	2.0794415416798357	0.0	0	2	0	1	1	0	0.0	0.0	0.0	0.0	0.0	0.0	0.0	0.0	1.0	0.0	0.0	0.0	0.0	0.0	0.0	0.0	0.0	0.0	0.0	1.0	0.0	0.0	0.0	0.0	0.0	0.0	0.0	0	0	0	0	0
Las Vegas	8.016556168223369	3.269394215198362	1.4818039796936107	36.102059169191996	-115.17437270068199	New York New York Hotel Casino	NV	New York-New York Las Vegas Hotel & Casino 3790 Las Vegas Blvd S The Strip Las Vegas, NV 89109	9.169726689090886	5.631211781821365	1.6094379124341003	0	2	0	0	1	0	0.0	0.0	0.0	0.0	0.0	0.0	0.0	1.0	1.0	0.0	0.0	0.0	0.0	0.0	0.0	0.0	0.0	0.0	0.0	0.0	0.0	0.0	0.0	0.0	0.0	0.0	0.0	0	0	0	0	0
Las Vegas	6.646648310838721	4.19025287362911	0.38002526584918456	36.1162194	-115.1745719	Shadow Bar	NV	Caesars Palace 3570 Las Vegas Blvd The Strip Las Vegas, NV 89109	5.7899601708972535	2.833213344056216	0.0	1	1	1	1	1	2	0.0	0.0	0.0	1.0	1.0	0.0	0.0	0.0	1.0	0.0	0.0	1.0	0.0	0.0	0.0	0.0	0.0	0.0	0.0	1.0	0.0	1.0	0.0	0.0	0.0	0.0	0.0	0	0	0	1	0
Phoenix	13.365489815702848	17.485008262153208	11.16041203818886	33.567653899999996	-112.11365459999999	Ameriprise	AZ	2512 W Dunlap Ave Phoenix, AZ 85021	0.0	0.0	0.0	0	2	0	1	0	0	0.0	0.0	0.0	0.0	0.0	0.0	0.0	0.0	0.0	0.0	0.0	0.0	0.0	0.0	0.0	0.0	0.0	0.0	0.0	0.0	0.0	0.0	0.0	0.0	0.0	0.0	0.0	0	0	0	0	0
Phoenix	4.3999157050473725	8.548987097877037	1.9063605903314902	33.491358	-112.07333500000001	FedEx Office Print & Ship Center	AZ	3801 N Central Ave Phoenix, AZ 85012	4.605170185988092	2.1972245773362196	0.0	0	2	0	1	0	0	0.0	0.0	0.0	0.0	0.0	0.0	0.0	0.0	1.0	0.0	0.0	0.0	0.0	0.0	0.0	0.0	0.0	0.0	0.0	0.0	0.0	0.0	0.0	0.0	0.0	0.0	0.0	0	0	0	0	0
Charlotte	11.483249742921753	25.879458047652143	12.150923500420141	35.2983811	-80.7551773	Extended Stay America - Charlotte - University Place	NC	8211 University Executive Park Dr. University City Charlotte, NC 28262	0.0	0.0	0.0	0	2	0	0	1	0	0.0	0.0	0.0	0.0	0.0	0.0	0.0	0.0	1.0	0.0	0.0	0.0	0.0	0.0	0.0	0.0	0.0	0.0	0.0	0.0	0.0	0.0	0.0	0.0	0.0	0.0	0.0	0	0	0	0	0
Charlotte	2.809971454764595	24.735492374420154	2.2990224878101917	35.2206825	-80.8102148	Book Buyers	NC	1306 The Plaza Plaza Midwood Charlotte, NC 28205	4.276666119016055	1.0986122886681098	0.0	0	2	0	1	0	0	0.0	0.0	0.0	0.0	0.0	0.0	0.0	0.0	1.0	0.0	0.0	0.0	0.0	0.0	0.0	0.0	0.0	0.0	1.0	0.0	0.0	0.0	0.0	0.0	0.0	0.0	0.0	0	0	0	0	0
Phoenix	21.06715718213024	23.921623119195583	18.520039819540262	33.641045399999996	-112.0924497	Tasty House Chinese Restaurant	AZ	1512 W Bell Rd Ste 7 Phoenix, AZ 85023	3.1780538303479458	1.791759469228055	0.0	2	2	0	1	0	0	1.0	0.0	0.0	1.0	0.0	0.0	0.0	1.0	1.0	0.0	0.0	0.0	0.0	0.0	1.0	0.0	0.0	0.0	1.0	0.0	0.0	0.0	0.0	0.0	0.0	0.0	0.0	1	0	0	0	0
Phoenix	14.273429691996178	10.148762711436047	16.04862878892109	33.3481901715968	-111.98333329143699	Pacific Gardens	AZ	4747 E Elliott Rd Phoenix, AZ 85044	5.616771097666572	2.833213344056216	0.0	0	1	0	0	1	0	1.0	0.0	0.0	1.0	1.0	1.0	1.0	1.0	1.0	1.0	0.0	0.0	0.0	0.0	1.0	0.0	0.0	0.0	1.0	0.0	0.0	0.0	0.0	0.0	0.0	0.0	0.0	1	0	0	0	0
Pittsburgh	0.22374530027088596	20.129544071499403	42.0224435748591	40.4402916	-80.0021485	Il Pizzaiolo	PA	8 Market Sq Downtown Pittsburgh, PA 15222	5.4116460518550396	2.6390573296152584	0.0	1	1	0	0	1	0	0.0	1.0	0.0	1.0	1.0	1.0	1.0	0.0	1.0	1.0	0.0	0.0	0.0	0.0	1.0	0.0	1.0	1.0	0.0	0.0	0.0	0.0	0.0	0.0	0.0	0.0	0.0	1	0	0	0	0
Las Vegas	6.666803332233349	10.146746574633326	10.67483245809919	36.1553885	-115.062929	Hair & Nails Zone	NV	1212 S Nellis Blvd Sunrise Las Vegas, NV 89104	2.4849066497880004	1.0986122886681098	0.0	0	2	0	1	0	0	0.0	0.0	0.0	0.0	0.0	0.0	0.0	0.0	1.0	0.0	0.0	0.0	0.0	0.0	0.0	0.0	0.0	0.0	0.0	0.0	0.0	0.0	0.0	0.0	0.0	0.0	0.0	0	0	0	0	0
Phoenix	46.45063605012818	49.21842325081403	43.95365908063173	33.8666608	-112.14207040000001	Three Four Printing	AZ	42104 N Venture Dr Phoenix, AZ 85086	0.0	0.6931471805599453	0.0	0	2	0	1	0	0	0.0	0.0	0.0	0.0	0.0	0.0	0.0	0.0	1.0	0.0	0.0	0.0	0.0	0.0	0.0	0.0	0.0	0.0	0.0	0.0	0.0	0.0	0.0	0.0	0.0	0.0	0.0	0	0	0	0	0
Phoenix	10.611661078986575	12.453191162921486	7.823196240469116	33.5446316	-112.04734840000002	The Egoscue Method	AZ	7325 N 16th St Ste 140 Phoenix, AZ 85020	1.9459101490553132	0.0	0.0	0	2	0	1	0	0	0.0	0.0	0.0	0.0	0.0	0.0	0.0	0.0	0.0	0.0	0.0	0.0	0.0	0.0	0.0	0.0	0.0	0.0	0.0	0.0	0.0	0.0	0.0	0.0	0.0	0.0	0.0	0	0	0	0	0
Las Vegas	11.573578906899916	15.766719676061607	11.91879931883179	36.1945097103042	-115.25973424315501	L & L Hawaiian Barbecue	NV	1900 N Buffalo Dr Las Vegas, NV 89128	5.805134968916488	3.332204510175204	0.0	0	2	0	1	0	0	0.0	0.0	0.0	1.0	0.0	1.0	1.0	1.0	1.0	0.0	0.0	0.0	0.0	0.0	1.0	0.0	0.0	0.0	1.0	0.0	0.0	0.0	0.0	0.0	0.0	0.0	0.0	1	0	0	0	0
Phoenix	4.728346339849891	6.748246169218642	2.0986643607566493	33.4880368	-112.0478981	Lucky Boy Burger Shop	AZ	3430 N 16th St Phoenix, AZ 85016	5.863631175598097	3.6888794541139363	0.0	0	2	0	1	0	0	0.0	0.0	1.0	1.0	0.0	0.0	0.0	1.0	1.0	0.0	0.0	0.0	0.0	0.0	1.0	0.0	0.0	0.0	1.0	0.0	0.0	0.0	0.0	0.0	0.0	0.0	0.0	1	0	0	0	0
Las Vegas	12.173296980674788	3.901203520793641	6.14837855616065	36.059886530814794	-115.164267477342	McCarran Rent-a-Car Center	NV	7135 Gilespie St Southeast Las Vegas, NV 89119	7.591357046698551	4.343805421853684	1.0986122886681098	0	2	0	1	0	0	0.0	0.0	0.0	0.0	0.0	0.0	0.0	0.0	0.0	0.0	0.0	0.0	0.0	0.0	0.0	0.0	0.0	0.0	0.0	0.0	0.0	0.0	0.0	0.0	0.0	0.0	0.0	0	0	0	0	0
Phoenix	5.49333137632453	9.870664486927339	3.2144608723607595	33.5008094	-112.0821705	ABC Lock & Safe	AZ	4409 N 7th Ave Phoenix, AZ 85013	2.302585092994046	1.0986122886681098	0.0	0	2	0	1	0	0	0.0	0.0	0.0	0.0	0.0	0.0	0.0	0.0	1.0	0.0	0.0	0.0	0.0	0.0	0.0	0.0	0.0	0.0	0.0	0.0	0.0	0.0	0.0	0.0	0.0	0.0	0.0	0	0	0	0	0
Edinburgh	2.9654651383585406	12.3604217587229	2.904349507720565	55.9288511	-3.1692407000000005	Kildonan Lodge Hotel	EDH	27 Craigmillar Park Edinburgh EH16 5PE	0.0	0.0	0.0	0	2	0	0	2	0	0.0	0.0	0.0	0.0	0.0	0.0	0.0	0.0	1.0	0.0	0.0	0.0	0.0	0.0	0.0	0.0	0.0	0.0	0.0	0.0	0.0	0.0	0.0	0.0	0.0	0.0	0.0	0	0	0	0	0
Phoenix	16.43913925137178	17.807823994454115	13.654522827561435	33.5962527	-112.03540249999999	QuikTrip	AZ	2019 E Cactus Road Phoenix, AZ 85022	4.812184355372417	2.0794415416798357	0.0	0	2	0	1	0	0	0.0	0.0	0.0	0.0	0.0	0.0	0.0	0.0	1.0	0.0	0.0	0.0	0.0	0.0	0.0	0.0	0.0	0.0	1.0	0.0	0.0	0.0	0.0	0.0	0.0	0.0	0.0	0	0	0	0	0
Las Vegas	7.707957316138761	2.7467163434875506	1.4095388117563474	36.1026160755788	-115.167443434021	New York Pretzel	NV	MGM Hotel & Casino Food Court 3799 Las Vegas Blvd. South Eastside Las Vegas, NV 89109	3.1780538303479458	0.6931471805599453	0.0	0	2	0	1	0	0	0.0	0.0	0.0	0.0	0.0	0.0	0.0	0.0	1.0	0.0	0.0	0.0	0.0	0.0	0.0	0.0	0.0	0.0	0.0	1.0	0.0	0.0	0.0	0.0	0.0	0.0	0.0	0	0	0	0	0
Charlotte	18.481380040947478	38.241952690418245	18.747249162821532	35.1040351532412	-80.9836164762165	Best Buy	NC	14125 Rivergate Pkwy Steele Creek Charlotte, NC 28273	4.219507705176107	1.791759469228055	0.0	0	2	0	1	1	0	0.0	0.0	0.0	0.0	0.0	0.0	0.0	0.0	1.0	0.0	0.0	0.0	0.0	0.0	0.0	0.0	1.0	0.0	0.0	0.0	0.0	0.0	0.0	0.0	0.0	0.0	0.0	0	0	0	0	0
Charlotte	2.731580275552618	24.797746644333984	2.262126999184985	35.220458317332294	-80.8110996575259	Charlotte Mecklenburg Library - Plaza Midwood	NC	1623 Central Avenue Plaza Midwood Charlotte, NC 28205	3.912023005428146	0.6931471805599453	0.0	0	2	0	0	0	0	0.0	0.0	0.0	0.0	0.0	0.0	0.0	0.0	0.0	0.0	0.0	0.0	0.0	0.0	0.0	0.0	0.0	0.0	0.0	0.0	0.0	0.0	0.0	0.0	0.0	0.0	0.0	0	0	0	0	0
Edinburgh	2.942310911903429	10.879820715585414	3.5455822824995953	55.9796755	-3.1877533	Newhaven Express Chinese	EDH	6 Anchorfield Leith Edinburgh EH6 4JG	0.0	0.0	0.0	2	0	0	1	1	0	1.0	0.0	0.0	1.0	1.0	0.0	1.0	1.0	1.0	1.0	0.0	0.0	0.0	0.0	1.0	0.0	0.0	0.0	0.0	0.0	0.0	0.0	0.0	0.0	0.0	0.0	0.0	1	0	0	0	0
Phoenix	18.34004662960909	14.728043751715852	20.348913274005323	33.306665734255	-111.97983078416401	AZ Tips & Toes Nail Spa	AZ	15425 S 48th St Ste 106 Phoenix, AZ 85044	4.795790545596741	2.0794415416798357	0.0	0	2	0	1	1	0	0.0	0.0	0.0	0.0	0.0	0.0	0.0	0.0	1.0	0.0	0.0	0.0	0.0	0.0	0.0	0.0	0.0	0.0	1.0	0.0	0.0	0.0	0.0	0.0	0.0	0.0	0.0	0	0	0	0	0
Las Vegas	11.523695820117025	5.313539591972149	8.969128832488682	36.0709857	-115.0871138	In Touch Credit Union	NV	4299 E Sunset Rd Las Vegas, NV 89120	2.3978952727983707	0.0	0.0	0	2	0	1	0	0	0.0	0.0	0.0	0.0	0.0	0.0	0.0	0.0	0.0	0.0	0.0	0.0	0.0	0.0	0.0	0.0	0.0	0.0	0.0	0.0	0.0	0.0	0.0	0.0	0.0	0.0	0.0	0	0	0	0	0
Las Vegas	8.140681806574142	3.7114603945996656	6.443929652567968	36.0990486	-115.101808	Sunflower	NV	3365 E Tropicana Ave Southeast Las Vegas, NV 89121	5.2832037287379885	2.995732273553991	0.0	0	2	0	1	1	0	0.0	0.0	0.0	0.0	0.0	0.0	0.0	0.0	1.0	0.0	0.0	0.0	0.0	0.0	0.0	0.0	0.0	0.0	1.0	0.0	0.0	0.0	0.0	0.0	0.0	0.0	0.0	0	0	0	0	0
Las Vegas	6.608833585612597	4.016151607700716	0.18733493779480417	36.1156338	-115.17255700000001	Flamingo Health Club and Spa	NV	3555 Las Vegas Blvd S The Strip Las Vegas, NV 89109	4.762173934797756	1.791759469228055	0.0	0	2	0	1	0	0	0.0	0.0	0.0	0.0	0.0	0.0	0.0	0.0	0.0	0.0	0.0	0.0	0.0	0.0	0.0	0.0	0.0	0.0	0.0	0.0	0.0	0.0	0.0	0.0	0.0	0.0	0.0	0	0	0	0	0
Charlotte	1.6612274612507385	28.412524346250958	4.197925216273056	35.215127	-80.856881	Charlotte Tailgate Farmers Market	NC	100 W. Park Avenue South End Charlotte, NC 28263	0.0	0.0	0.0	0	2	0	1	0	0	0.0	0.0	0.0	0.0	0.0	0.0	0.0	0.0	0.0	0.0	0.0	0.0	0.0	0.0	0.0	0.0	0.0	0.0	1.0	0.0	0.0	0.0	0.0	0.0	0.0	0.0	0.0	0	0	0	0	0
Las Vegas	1.1095454476658828	9.01530026807117	7.388956156637083	36.169709600000004	-115.1236952	Inos Rice	NV	296 S 13th St Las Vegas, NV 89101	0.0	0.6931471805599453	0.0	0	2	0	1	0	0	1.0	0.0	0.0	1.0	0.0	1.0	0.0	1.0	1.0	1.0	0.0	0.0	0.0	0.0	1.0	0.0	0.0	0.0	0.0	0.0	0.0	0.0	0.0	0.0	0.0	0.0	0.0	0	0	0	0	0
Phoenix	26.300711852786478	25.2618848489272	23.570336231459358	33.6556803639591	-111.930081546307	Denny's	AZ	7000 E Mayo Blvd Phoenix, AZ 85054	3.7376696182833684	1.3862943611198906	0.0	0	2	0	0	1	0	0.0	1.0	0.0	1.0	1.0	0.0	0.0	1.0	1.0	1.0	0.0	0.0	0.0	0.0	1.0	0.0	0.0	0.0	0.0	0.0	0.0	0.0	0.0	0.0	0.0	0.0	0.0	1	0	0	0	0
Las Vegas	14.152191630888199	15.50973379144674	11.911180044384176	36.1570417	-115.29239369999999	Square Colour Salon + Spa	NV	1225 S Fort Apache Rd. Ste 160 Westside Las Vegas, NV 89117	5.857933154483459	3.5553480614894135	0.0	0	2	0	1	1	0	0.0	0.0	0.0	0.0	0.0	0.0	0.0	1.0	1.0	0.0	0.0	0.0	0.0	0.0	0.0	0.0	0.0	0.0	1.0	0.0	0.0	0.0	0.0	0.0	0.0	0.0	0.0	0	0	0	0	0
Las Vegas	12.170884676776499	3.8883910686248107	7.635029579260116	36.057855200000006	-115.1234868	Sonic Drive-In	NV	2082 E Warm Springs Rd Southeast Las Vegas, NV 89119	6.202535517187923	3.6375861597263857	0.0	0	2	0	1	0	0	0.0	1.0	1.0	1.0	0.0	0.0	0.0	1.0	1.0	0.0	0.0	0.0	0.0	0.0	1.0	0.0	0.0	0.0	1.0	0.0	0.0	0.0	0.0	0.0	0.0	0.0	0.0	1	0	1	0	0
Las Vegas	11.389853092892972	15.396328086756967	11.54812299939045	36.190622499999996	-115.25884140000001	Lashes On Broadway	NV	1750 N Buffalo Dr Suite 103 Las Vegas, NV 89128	0.0	0.0	0.0	0	2	0	1	0	0	0.0	0.0	0.0	0.0	0.0	0.0	0.0	0.0	1.0	0.0	0.0	0.0	0.0	0.0	0.0	0.0	0.0	0.0	1.0	0.0	0.0	0.0	0.0	0.0	0.0	0.0	0.0	0	0	0	0	0
Pittsburgh	4.940579327628174	24.820619147408753	39.208596565000605	40.460839899999996	-79.9477607	Fukuda	PA	4770 Liberty Ave Fl 1 Bloomfield Pittsburgh, PA 15224	4.418840607796598	2.302585092994046	0.0	0	2	0	1	1	0	0.0	0.0	0.0	0.0	0.0	1.0	1.0	0.0	1.0	1.0	0.0	0.0	0.0	0.0	1.0	0.0	1.0	0.0	0.0	0.0	0.0	0.0	0.0	0.0	0.0	0.0	0.0	1	0	0	0	0
Pittsburgh	5.600169587786497	15.523287690994648	45.40491654452103	40.4186707737977	-80.0590467453003	Double Tree Hotel	PA	101 Double Tree Dr Greentree Pittsburgh, PA 15220	4.727387818712341	2.0794415416798357	0.0	0	2	0	0	1	0	0.0	0.0	0.0	0.0	0.0	0.0	0.0	0.0	1.0	0.0	0.0	0.0	0.0	0.0	0.0	0.0	0.0	0.0	0.0	0.0	0.0	0.0	0.0	0.0	0.0	0.0	0.0	0	0	0	0	0
Las Vegas	7.180391307440037	13.299363718968706	9.68955660749996	36.197511600000006	-115.2060571	Barbacoa Kings	NV	2115 N Decatur Blvd Las Vegas, NV 89108	1.6094379124341003	0.0	0.0	1	2	0	1	0	0	0.0	0.0	0.0	0.0	0.0	0.0	0.0	1.0	1.0	0.0	0.0	0.0	0.0	0.0	1.0	0.0	0.0	0.0	0.0	0.0	0.0	0.0	0.0	0.0	0.0	0.0	0.0	1	0	0	0	0
Charlotte	14.877927593967698	25.93380954838695	12.728686420384776	35.088455200195305	-80.84584045410159	DentalWorks	NC	7510 Pineville Matthews Rd Charlotte, NC 28226	0.0	0.0	0.0	0	2	0	1	0	0	0.0	0.0	0.0	0.0	0.0	0.0	0.0	0.0	0.0	0.0	0.0	0.0	0.0	0.0	0.0	0.0	0.0	0.0	0.0	0.0	0.0	0.0	0.0	0.0	0.0	0.0	0.0	0	0	0	0	0
Las Vegas	0.4288966611102634	8.773754723222002	6.573296351208681	36.1688018067162	-115.13988008883601	Le Thai	NV	523 Fremont St Downtown Las Vegas, NV 89101	8.171599480345463	5.652489180268651	1.791759469228055	0	1	0	1	1	0	0.0	1.0	0.0	1.0	1.0	1.0	1.0	1.0	1.0	1.0	0.0	0.0	0.0	0.0	1.0	0.0	1.0	0.0	0.0	0.0	0.0	0.0	0.0	0.0	0.0	0.0	0.0	1	0	0	0	0
Las Vegas	19.78437773440339	11.400028127271797	13.557647574882836	35.993482799999995	-115.1856153	Blue Truck Window Cleaning	NV	11733 Polaris Ave Ste 400 Southwest Las Vegas, NV 89141	0.0	0.0	0.0	0	2	0	1	0	0	0.0	0.0	0.0	0.0	0.0	0.0	0.0	0.0	1.0	0.0	0.0	0.0	0.0	0.0	0.0	0.0	0.0	0.0	0.0	0.0	0.0	0.0	0.0	0.0	0.0	0.0	0.0	0	0	0	0	0
Charlotte	15.021840767896967	27.90563933277581	13.275432044999155	35.0889	-80.8678	KFC	NC	8800 Pineville Matthews Rd Charlotte, NC 28226	1.6094379124341003	0.0	0.0	0	2	0	0	0	0	0.0	0.0	0.0	0.0	0.0	1.0	0.0	0.0	1.0	0.0	0.0	0.0	0.0	0.0	1.0	0.0	0.0	0.0	0.0	0.0	0.0	0.0	0.0	0.0	0.0	0.0	0.0	1	0	1	0	0
Las Vegas	6.265483543435974	2.9674667926396565	1.2487243332998987	36.1133411548363	-115.1568938	LAX Nightclub	NV	3900 Las Vegas Blvd S Eastside Las Vegas, NV 89109	6.61338421837956	4.189654742026425	0.0	3	1	0	1	2	2	0.0	0.0	0.0	1.0	0.0	0.0	0.0	0.0	1.0	0.0	0.0	1.0	0.0	0.0	0.0	1.0	0.0	1.0	0.0	1.0	0.0	1.0	0.0	0.0	0.0	0.0	0.0	0	0	0	1	0
Charlotte	6.158914053094798	22.242240844606616	2.770911875240941	35.178168	-80.80029300000001	Bank of America	NC	4401 Randolph Rd Cotswold Charlotte, NC 28211	2.772588722239781	0.6931471805599453	0.0	0	2	0	1	0	0	0.0	0.0	0.0	0.0	0.0	0.0	0.0	0.0	1.0	0.0	0.0	0.0	0.0	0.0	0.0	0.0	0.0	0.0	0.0	0.0	0.0	0.0	0.0	0.0	0.0	0.0	0.0	0	0	0	0	0
Charlotte	20.77041343604108	22.931710820470112	17.95086729184333	35.039359999999995	-80.7937	Switchin' Kitchens	NC	8025 Ardrey Kell Rd Charlotte, NC 28277	0.0	0.6931471805599453	0.0	0	2	0	1	0	0	0.0	0.0	0.0	0.0	0.0	0.0	0.0	0.0	0.0	0.0	0.0	0.0	0.0	0.0	1.0	0.0	0.0	0.0	0.0	0.0	0.0	0.0	0.0	0.0	0.0	0.0	0.0	1	0	0	0	0
Las Vegas	11.395501604632013	16.66436763799897	12.85640943215989	36.211461	-115.24986100000001	Goodfellas Bar & Restaurant	NV	2801 N Tenaya Way Las Vegas, NV 89128	1.9459101490553132	1.3862943611198906	0.0	0	1	0	0	1	0	0.0	1.0	0.0	1.0	1.0	0.0	1.0	0.0	1.0	0.0	0.0	0.0	0.0	0.0	0.0	0.0	0.0	0.0	0.0	0.0	0.0	0.0	0.0	0.0	0.0	0.0	0.0	1	0	0	1	0
Phoenix	0.7789285047969683	6.08691389712506	3.4860589647319276	33.44487410000001	-112.07252959999998	Arena Park Place L.P.	AZ	334 S First St Phoenix, AZ 85004	0.0	0.0	0.0	0	2	0	1	0	0	0.0	0.0	0.0	0.0	0.0	0.0	0.0	0.0	0.0	0.0	0.0	0.0	0.0	0.0	0.0	0.0	0.0	0.0	0.0	0.0	0.0	0.0	0.0	0.0	0.0	0.0	0.0	0	0	0	0	0
Phoenix	26.390495734223887	28.08703968053555	23.667378536886364	33.6884971	-112.046733	Pioneer Landscaping Materials	AZ	1638 E Deer Valley Rd Phoenix, AZ 85024	1.6094379124341003	0.6931471805599453	0.0	0	2	0	1	1	0	0.0	0.0	0.0	0.0	0.0	0.0	0.0	0.0	1.0	0.0	0.0	0.0	0.0	0.0	0.0	0.0	0.0	0.0	0.0	0.0	0.0	0.0	0.0	0.0	0.0	0.0	0.0	0	0	0	0	0
Charlotte	14.91611160971981	20.206037911120486	11.843369427397548	35.096526000000004	-80.783798	Barnes & Noble Booksellers	NC	3327 Pineville Matthews Rd Arboretum Charlotte, NC 28226	4.624972813284271	1.3862943611198906	0.0	0	2	0	1	1	0	0.0	0.0	0.0	0.0	0.0	0.0	0.0	0.0	1.0	0.0	0.0	0.0	0.0	0.0	0.0	0.0	0.0	0.0	1.0	0.0	0.0	0.0	0.0	0.0	0.0	0.0	0.0	0	0	0	0	0
Las Vegas	2.849741078620222	5.8759307849671165	4.725748201136368	36.141853000000005	-115.129795	Sonoma Shadows	NV	1750 Karen Ave Eastside Las Vegas, NV 89169	0.0	0.0	0.0	0	2	0	1	0	0	0.0	0.0	0.0	0.0	0.0	0.0	0.0	0.0	1.0	0.0	0.0	0.0	0.0	0.0	0.0	0.0	0.0	0.0	0.0	0.0	0.0	0.0	0.0	0.0	0.0	0.0	0.0	0	0	0	0	0
Edinburgh	1.1747835858557254	9.50891728061594	0.6925429788477642	55.95319839999999	-3.2070729	Eighty Queen Street	EDH	80 Queen Street New Town Edinburgh EH2 4NF	0.0	0.0	0.0	0	2	0	1	2	0	0.0	0.0	0.0	0.0	0.0	0.0	0.0	0.0	0.0	0.0	0.0	0.0	0.0	0.0	0.0	0.0	0.0	0.0	0.0	0.0	0.0	0.0	0.0	0.0	0.0	0.0	0.0	1	0	0	1	0
Edinburgh	2.819188731401246	11.752743831582917	3.590832144409421	55.977025100000006	-3.1727333	Chop Chop Leith	EDH	76 Commercial Street Leith Edinburgh EH6 6LX	3.367295829986474	1.3862943611198906	0.0	0	1	0	1	1	0	1.0	1.0	0.0	1.0	0.0	0.0	1.0	1.0	1.0	1.0	0.0	0.0	0.0	0.0	1.0	0.0	1.0	0.0	0.0	0.0	0.0	0.0	0.0	0.0	0.0	0.0	0.0	1	0	0	0	0
Phoenix	9.718643287813078	8.155197864976323	7.411743937831352	33.5103461	-111.9968077	BlakSteel Fitness	AZ	3912 E Camelback Rd Ste 3 Phoenix, AZ 85018	0.0	0.0	0.0	0	2	0	1	0	0	0.0	0.0	0.0	0.0	0.0	0.0	0.0	1.0	0.0	0.0	0.0	0.0	0.0	0.0	0.0	0.0	0.0	0.0	0.0	0.0	0.0	0.0	0.0	0.0	0.0	0.0	0.0	0	0	0	0	0
Las Vegas	11.316823074084606	3.571641872811629	5.052097659348215	36.0695477	-115.17227220000001	Lucy	NV	6659 Las Vegas Blvd S at Town Ctr Southeast Las Vegas, NV 89199	0.0	0.6931471805599453	0.0	0	2	0	1	2	0	0.0	0.0	0.0	0.0	0.0	0.0	0.0	0.0	1.0	0.0	0.0	0.0	0.0	0.0	0.0	0.0	0.0	0.0	0.0	0.0	0.0	0.0	0.0	0.0	0.0	0.0	0.0	0	0	0	0	0
Charlotte	5.04459406252359	25.97329977996487	6.170987441040859	35.254958	-80.802188	Burger King	NC	3709 N Tryon St North Charlotte Charlotte, NC 28206	2.0794415416798357	1.0986122886681098	0.0	0	2	0	1	0	0	0.0	0.0	0.0	0.0	0.0	0.0	0.0	1.0	1.0	0.0	0.0	0.0	0.0	0.0	1.0	0.0	0.0	0.0	0.0	0.0	0.0	0.0	0.0	0.0	0.0	0.0	0.0	1	0	0	0	0
Charlotte	15.015311322268147	27.71128789208627	13.226905601877634	35.088675	-80.865605	House of Athens	NC	8652 Pineville-Matthews Rd Ste1000 Charlotte, NC 28226	3.367295829986474	1.3862943611198906	0.0	2	2	0	1	0	0	0.0	0.0	0.0	1.0	0.0	1.0	1.0	0.0	1.0	0.0	0.0	0.0	0.0	0.0	1.0	0.0	0.0	0.0	1.0	0.0	0.0	0.0	0.0	0.0	0.0	0.0	0.0	1	0	0	0	0
Pittsburgh	8.392935987877578	12.236687148067704	45.54075460116165	40.39114	-80.07378800000001	Denny's	PA	2180 Greentree Rd Pittsburgh, PA 15220	3.6635616461296463	1.3862943611198906	0.0	0	2	0	1	0	0	0.0	0.0	0.0	1.0	0.0	0.0	1.0	1.0	1.0	0.0	0.0	0.0	0.0	0.0	1.0	0.0	0.0	0.0	0.0	0.0	0.0	0.0	0.0	0.0	0.0	0.0	0.0	1	0	0	0	0
Las Vegas	13.410458051329341	13.148398195694245	9.842775379659578	36.131562	-115.278028	The UPS Store	NV	8550 W Desert Inn Rd Ste 102 Westside Las Vegas, NV 89117	2.9444389791664403	0.6931471805599453	0.0	0	2	0	1	0	0	0.0	0.0	0.0	0.0	0.0	0.0	0.0	0.0	1.0	0.0	0.0	0.0	0.0	0.0	0.0	0.0	0.0	0.0	0.0	0.0	0.0	0.0	0.0	0.0	0.0	0.0	0.0	0	0	0	0	0
Charlotte	7.3058692148533	28.93720694055064	7.08096329321099	35.164425	-80.87881800000001	Aldi	NC	5550 Old Pineville Rd Starmount Charlotte, NC 28217	4.174387269895637	1.791759469228055	0.0	0	2	0	1	0	0	0.0	0.0	0.0	0.0	0.0	0.0	0.0	0.0	0.0	0.0	0.0	0.0	0.0	0.0	0.0	0.0	0.0	0.0	1.0	0.0	0.0	0.0	0.0	0.0	0.0	0.0	0.0	0	0	0	0	0
Edinburgh	0.6207840409352313	10.406188658230942	0.3849228225468563	55.9485301	-3.1935539	Long Tall Sally	EDH	1 Victoria Street Grassmarket Edinburgh EH1 2HE	0.0	0.0	0.0	0	2	0	1	1	0	0.0	0.0	0.0	0.0	0.0	0.0	0.0	0.0	1.0	0.0	0.0	0.0	0.0	0.0	0.0	0.0	0.0	0.0	0.0	0.0	0.0	0.0	0.0	0.0	0.0	0.0	0.0	0	0	0	0	0
Madison	2.358061257400482	10.887330623635142	2.415943951326488	43.0538081	-89.3959468	Quality True Value Hardware	WI	1201 S Park St Bay Creek Madison, WI 53715	0.0	0.6931471805599453	0.0	0	2	0	1	1	0	0.0	0.0	0.0	0.0	0.0	0.0	0.0	0.0	1.0	0.0	0.0	0.0	0.0	0.0	0.0	0.0	1.0	0.0	0.0	0.0	0.0	0.0	0.0	0.0	0.0	0.0	0.0	0	0	0	0	0
Charlotte	13.736021900234205	34.057699343581895	13.851191421738054	35.128079	-80.938538	La Poblanita Mexican Restaurant	NC	1925 Westinghouse Blvd Steele Creek Charlotte, NC 28273	3.9512437185814275	2.3978952727983707	0.0	0	1	0	0	0	0	0.0	1.0	0.0	1.0	1.0	1.0	1.0	1.0	1.0	1.0	0.0	0.0	0.0	0.0	1.0	0.0	0.0	0.0	1.0	0.0	0.0	0.0	0.0	0.0	0.0	0.0	0.0	1	0	0	0	0
Las Vegas	8.951092683588785	15.594758582467456	12.012448201684329	36.2176761	-115.21312920000001	Jack in the Box	NV	3211 N Rancho Dr Northwest Las Vegas, NV 89130	3.1780538303479458	1.0986122886681098	0.0	0	2	0	1	0	0	0.0	1.0	1.0	1.0	0.0	0.0	0.0	1.0	1.0	0.0	0.0	0.0	0.0	0.0	1.0	0.0	0.0	0.0	0.0	0.0	0.0	0.0	0.0	0.0	0.0	0.0	0.0	1	0	1	0	0
Madison	0.8956818286389103	8.300461711107255	1.7482670486331537	43.0746597	-89.3817071	Blowin' Smoke BBQ Food Cart	WI	East Main and South Pinckney Capitol Madison, WI 53703	2.995732273553991	1.0986122886681098	0.0	0	2	0	1	0	0	0.0	1.0	0.0	0.0	0.0	1.0	0.0	1.0	0.0	0.0	0.0	0.0	0.0	0.0	1.0	0.0	0.0	0.0	0.0	0.0	0.0	0.0	0.0	0.0	0.0	0.0	0.0	1	0	0	0	0
Las Vegas	17.80896114085	17.118662400064707	14.078729206511388	36.124882899999996	-115.32651499999999	Michaud Law Office	NV	3595 S Town Center Dr Ste 111 South Summerlin Las Vegas, NV 89135	0.0	0.6931471805599453	0.0	0	2	0	1	0	0	0.0	0.0	0.0	0.0	0.0	0.0	0.0	0.0	0.0	0.0	0.0	0.0	0.0	0.0	0.0	0.0	0.0	0.0	0.0	0.0	0.0	0.0	0.0	0.0	0.0	0.0	0.0	0	0	0	0	0
Edinburgh	0.781819957301692	9.897853198849711	0.6207939873544036	55.9540946	-3.2006919999999996	La P'tite Folie	EDH	61 Frederick Street New Town Edinburgh EH2 1LH	1.6094379124341003	0.0	0.0	1	1	0	1	1	0	0.0	0.0	0.0	1.0	0.0	1.0	1.0	0.0	1.0	1.0	0.0	0.0	0.0	0.0	0.0	0.0	0.0	0.0	0.0	0.0	0.0	0.0	0.0	0.0	0.0	0.0	0.0	1	0	0	0	0
Las Vegas	21.200596519706377	27.22580069118314	23.420437558757254	36.29018370000001	-115.31596329999999	Liberty Square At Providence	NV	7099 N Hualapai Way Centennial Las Vegas, NV 89166	5.0106352940962555	1.3862943611198906	0.0	0	2	0	1	0	0	0.0	0.0	0.0	0.0	0.0	0.0	0.0	0.0	1.0	0.0	0.0	0.0	0.0	0.0	0.0	0.0	0.0	0.0	0.0	0.0	0.0	0.0	0.0	0.0	0.0	0.0	0.0	0	0	0	0	0
Las Vegas	1.8547286259189655	8.473249596627188	5.711947697270205	36.1651684	-115.1560759	Oliver Peoples	NV	Las Vegas Premium Outlets 875 S Grand Central Pkwy, Ste 1605 Downtown Las Vegas, NV 89106	3.4339872044851463	1.9459101490553132	0.0	0	2	0	1	1	0	0.0	0.0	0.0	0.0	0.0	0.0	0.0	0.0	1.0	0.0	0.0	0.0	0.0	0.0	0.0	0.0	0.0	0.0	1.0	0.0	0.0	0.0	0.0	0.0	0.0	0.0	0.0	0	0	0	0	0
Pittsburgh	6.966309519554355	13.426784596246927	42.984942087147076	40.388324	-80.043317	Jvu's Hair Studio	PA	246 Washington Rd Pittsburgh, PA 15216	0.0	0.0	0.0	0	2	0	1	0	0	0.0	0.0	0.0	0.0	0.0	0.0	0.0	0.0	0.0	0.0	0.0	0.0	0.0	0.0	0.0	0.0	0.0	0.0	0.0	0.0	0.0	0.0	0.0	0.0	0.0	0.0	0.0	0	0	0	0	0
Phoenix	7.747369894403267	8.379128592397919	5.075621775207601	33.5106326179065	-112.029752	Two Sparks Electric	AZ	Phoenix, AZ 85016	0.0	0.0	0.0	0	2	0	1	0	0	0.0	0.0	0.0	0.0	0.0	0.0	0.0	0.0	1.0	0.0	0.0	0.0	0.0	0.0	0.0	0.0	0.0	0.0	0.0	0.0	0.0	0.0	0.0	0.0	0.0	0.0	0.0	0	0	0	0	0
Las Vegas	10.11162892562682	15.067158572345623	11.253665184265051	36.1989201	-115.2409321	Diva Beauty - A Threading Boutique	NV	2184 N Rainbow Blvd Las Vegas, NV 89108	5.241747015059643	2.772588722239781	0.0	0	2	0	1	0	0	0.0	0.0	0.0	0.0	0.0	0.0	0.0	0.0	1.0	0.0	0.0	0.0	0.0	0.0	0.0	0.0	0.0	0.0	1.0	0.0	0.0	0.0	0.0	0.0	0.0	0.0	0.0	0	0	0	0	0
Las Vegas	13.685524409399559	13.177506507080023	9.944688887413758	36.128141299999996	-115.2798834	1 800 Flowers Shoppe	NV	3385 S Durango Spring Valley Las Vegas, NV 89117	0.0	1.3862943611198906	0.0	0	2	0	1	2	0	0.0	0.0	0.0	0.0	0.0	0.0	0.0	0.0	1.0	0.0	0.0	0.0	0.0	0.0	0.0	0.0	0.0	0.0	0.0	0.0	0.0	0.0	0.0	0.0	0.0	0.0	0.0	0	0	0	0	0
Phoenix	8.50739258711345	6.551575012046912	10.68979991518284	33.382744	-112.03443999999999	South Mountain Community Library	AZ	7050 S 24th St Phoenix, AZ 85042	3.6888794541139363	1.3862943611198906	0.0	0	2	0	0	0	0	0.0	0.0	0.0	0.0	0.0	0.0	0.0	0.0	0.0	0.0	0.0	0.0	0.0	0.0	0.0	0.0	0.0	0.0	0.0	0.0	0.0	0.0	0.0	0.0	0.0	0.0	0.0	0	0	0	0	0
Charlotte	15.520378968948423	22.300716430736447	12.728752742387453	35.085803999999996	-80.804784	Mecklenburg County William R Davie Park	NC	4635 Pineville Matthews Rd Arboretum Charlotte, NC 28226	4.189654742026425	2.0794415416798357	0.0	0	2	0	1	0	0	0.0	0.0	0.0	0.0	0.0	0.0	0.0	1.0	0.0	0.0	0.0	0.0	0.0	0.0	0.0	0.0	0.0	0.0	0.0	0.0	0.0	0.0	0.0	0.0	0.0	0.0	0.0	0	0	0	0	0
Phoenix	16.570201644635908	12.644347923108274	18.45307310112139	33.3261342	-111.97799609999998	Presidio at South Mountain	AZ	13229 S 48th St Phoenix, AZ 85044	2.6390573296152584	1.6094379124341003	0.0	0	2	0	1	0	0	0.0	0.0	0.0	0.0	0.0	0.0	0.0	0.0	1.0	0.0	0.0	0.0	0.0	0.0	0.0	0.0	0.0	0.0	0.0	0.0	0.0	0.0	0.0	0.0	0.0	0.0	0.0	0	0	0	0	0
Las Vegas	13.671676525924711	16.855534543011768	13.046958784968067	36.1865989875954	-115.285656606551	Bruce Trent Park	NV	Vegas Dr. and N. Rampart Blvd 8851 Vegas Dr Summerlin Las Vegas, NV 89128	4.941642422609304	2.3978952727983707	0.6931471805599453	0	2	0	1	0	0	0.0	0.0	0.0	0.0	0.0	0.0	0.0	1.0	0.0	0.0	0.0	0.0	0.0	0.0	0.0	0.0	0.0	0.0	0.0	0.0	0.0	0.0	0.0	0.0	0.0	0.0	0.0	0	0	0	0	0
Edinburgh	1.504117498813339	9.275341282791446	1.314923773429438	55.958772387305004	-3.2102437968752002	Buffalo Grill Stockbridge	EDH	1 Raeburn Place Stockbridge Edinburgh EH4 1HU	0.0	0.0	0.0	0	0	0	1	1	0	0.0	0.0	0.0	1.0	0.0	0.0	1.0	0.0	1.0	1.0	0.0	0.0	0.0	0.0	0.0	0.0	0.0	0.0	0.0	0.0	0.0	0.0	0.0	0.0	0.0	0.0	0.0	1	0	0	0	0
Edinburgh	2.1456876652984236	9.826170136580082	1.3505189853819377	55.937159400000006	-3.2071633	Artisan Cheesecakes	EDH	104 Bruntsfield Place The Meadows Edinburgh EH10 4ES	2.0794415416798357	1.6094379124341003	0.0	0	2	0	1	0	0	0.0	0.0	0.0	0.0	0.0	0.0	0.0	0.0	1.0	0.0	0.0	0.0	0.0	0.0	0.0	0.0	0.0	0.0	0.0	0.0	0.0	0.0	0.0	0.0	0.0	0.0	0.0	0	0	0	0	0
Las Vegas	6.552223058667059	8.901191940305582	5.060185660223723	36.150762	-115.205574	Hot-n-Fresh Cinnamon Rolls	NV	1717 S Decatur Blvd Ste J-35 Westside Las Vegas, NV 89102	0.0	0.6931471805599453	0.0	0	2	0	1	0	0	0.0	0.0	0.0	0.0	0.0	0.0	0.0	0.0	1.0	0.0	0.0	0.0	0.0	0.0	0.0	0.0	0.0	0.0	1.0	0.0	0.0	0.0	0.0	0.0	0.0	0.0	0.0	0	0	0	0	0
Pittsburgh	1.3704155439146488	19.00670918918755	41.94847015728971	40.4307117137173	-80.00749105027991	The Summit	PA	200 Shiloh St Mt. Washington Pittsburgh, PA 15211	4.532599493153256	2.1972245773362196	0.0	0	1	0	1	1	1	0.0	0.0	0.0	1.0	0.0	0.0	1.0	0.0	1.0	0.0	1.0	0.0	0.0	0.0	0.0	0.0	1.0	0.0	0.0	1.0	0.0	0.0	0.0	0.0	0.0	0.0	0.0	1	0	0	1	0
Phoenix	9.981368764146282	13.696674381238742	12.682354868316681	33.378679043963	-112.137222513556	Big Lots	AZ	3630 W Baseline Rd Phoenix, AZ 85339	2.3978952727983707	0.0	0.0	0	2	0	1	0	0	0.0	0.0	0.0	0.0	0.0	0.0	0.0	0.0	1.0	0.0	0.0	0.0	0.0	0.0	0.0	0.0	0.0	0.0	0.0	0.0	0.0	0.0	0.0	0.0	0.0	0.0	0.0	0	0	0	0	0
Madison	9.70138665666425	16.67294369724371	8.86811940642769	43.0570896	-89.5092997	Aeropostale	WI	61 W Towne Mall Madison, WI 53719	0.0	0.0	0.0	0	2	0	1	2	0	0.0	0.0	0.0	0.0	0.0	0.0	0.0	0.0	1.0	0.0	0.0	0.0	0.0	0.0	0.0	0.0	0.0	0.0	0.0	0.0	0.0	0.0	0.0	0.0	0.0	0.0	0.0	0	0	0	0	0
Edinburgh	0.5590555277419463	10.476592766378731	0.46043498248231673	55.948785119329	-3.1923574761349	Pizza Express	EDH	59-63 George IV Bridge Victoria Terrace Grassmarket Edinburgh EH1 1RN	3.4965075614664802	1.0986122886681098	0.0	0	2	0	0	1	0	0.0	0.0	0.0	1.0	0.0	0.0	1.0	1.0	1.0	1.0	0.0	0.0	0.0	0.0	1.0	0.0	0.0	0.0	0.0	0.0	0.0	0.0	0.0	0.0	0.0	0.0	0.0	1	0	0	0	1
Las Vegas	10.44232277990253	2.9946810113262545	6.7999652677129205	36.074667	-115.11381399999999	Asap Pool Service	NV	2550 Chandler Ave Ste 19 Southeast Las Vegas, NV 89120	0.0	0.0	0.0	0	2	0	1	0	0	0.0	0.0	0.0	0.0	0.0	0.0	0.0	0.0	1.0	0.0	0.0	0.0	0.0	0.0	0.0	0.0	0.0	0.0	0.0	0.0	0.0	0.0	0.0	0.0	0.0	0.0	0.0	0	0	0	0	0
Edinburgh	0.5375400377387006	10.606267291069496	1.2546111325579972	55.958063100000004	-3.188962	Villeneuve Wines	EDH	49a Broughton Street New Town Edinburgh EH1 3RJ	0.0	0.0	0.0	0	2	0	1	2	0	0.0	0.0	0.0	0.0	0.0	0.0	0.0	0.0	1.0	0.0	0.0	0.0	0.0	0.0	0.0	0.0	0.0	0.0	0.0	0.0	0.0	0.0	0.0	0.0	0.0	0.0	0.0	0	0	0	0	0
Phoenix	24.857808372849107	26.251480420776474	22.100148779292997	33.673113	-112.033042	Ageless Health Institute	AZ	20616 N Cave Creek Rd Ste B-110 Phoenix, AZ 85024	0.0	1.3862943611198906	0.0	0	2	0	1	1	0	0.0	0.0	0.0	0.0	0.0	0.0	0.0	0.0	1.0	0.0	0.0	0.0	0.0	0.0	0.0	0.0	0.0	0.0	1.0	0.0	0.0	0.0	0.0	0.0	0.0	0.0	0.0	0	0	0	0	0
Charlotte	12.906395761097782	26.50779923233966	13.64094051435472	35.310609899999996	-80.748385	A Taste of Philly	NC	9015-5B JM Keynes Dr University City Charlotte, NC 28262	1.791759469228055	0.6931471805599453	0.0	0	2	0	1	0	0	0.0	0.0	0.0	0.0	0.0	0.0	0.0	0.0	1.0	0.0	0.0	0.0	0.0	0.0	0.0	0.0	0.0	0.0	0.0	0.0	0.0	0.0	0.0	0.0	0.0	0.0	0.0	1	0	0	0	0
Edinburgh	0.6302368912172835	10.523489823219458	0.49895837157541684	55.947949	-3.1917998	Central Library	EDH	George IV Bridge Old Town Edinburgh EH1 1EG	4.30406509320417	1.9459101490553132	0.0	0	2	0	0	0	0	0.0	0.0	0.0	0.0	0.0	0.0	0.0	0.0	0.0	0.0	0.0	0.0	0.0	0.0	0.0	0.0	0.0	0.0	0.0	0.0	0.0	0.0	0.0	0.0	0.0	0.0	0.0	0	0	0	0	0
Phoenix	10.595346908460064	16.986023514028297	11.424624179516568	33.4654588	-112.18728090000002	Autozone	AZ	5921 W McDowell Road Phoenix, AZ 85035	0.0	0.0	0.0	0	2	0	1	0	0	0.0	0.0	0.0	0.0	0.0	0.0	0.0	0.0	0.0	0.0	0.0	0.0	0.0	0.0	0.0	0.0	0.0	0.0	0.0	0.0	0.0	0.0	0.0	0.0	0.0	0.0	0.0	0	0	0	0	0
Pittsburgh	2.061719174661587	20.154809625230587	40.00323583879816	40.4286785	-79.9832088	Lesvos Gyros	PA	1502 E Carson St South Side Pittsburgh, PA 15203	3.784189633918261	0.6931471805599453	0.0	0	2	0	1	0	0	0.0	0.0	0.0	1.0	1.0	0.0	0.0	1.0	0.0	0.0	0.0	0.0	0.0	0.0	1.0	0.0	1.0	0.0	0.0	0.0	0.0	0.0	0.0	0.0	0.0	0.0	0.0	1	0	0	0	0
Phoenix	7.807786306030692	13.133544097720735	6.32323350162154	33.5124345	-112.11697520000001	Capitol Collision	AZ	5154 N 27th Ave Phoenix, AZ 85017	1.6094379124341003	0.0	0.0	0	2	0	1	0	0	0.0	0.0	0.0	0.0	0.0	0.0	0.0	0.0	0.0	0.0	0.0	0.0	0.0	0.0	0.0	0.0	0.0	0.0	0.0	0.0	0.0	0.0	0.0	0.0	0.0	0.0	0.0	0	0	0	0	0
Edinburgh	1.540190152414126	9.247652851962116	1.3524904401385718	55.959021400000005	-3.2106767000000005	DollyLeo	EDH	22 Raeburn Place Stockbridge Edinburgh EH4 1HN	0.0	0.0	0.0	0	2	0	1	2	0	0.0	0.0	0.0	0.0	0.0	0.0	0.0	0.0	0.0	0.0	0.0	0.0	0.0	0.0	0.0	0.0	0.0	0.0	0.0	0.0	0.0	0.0	0.0	0.0	0.0	0.0	0.0	0	0	0	0	0
Las Vegas	16.65234221273142	16.20838370605801	13.066400898411858	36.1293153141524	-115.314676144706	Miki Nail Bar	NV	3330 S Hualapai Way Ste 120 South Summerlin Las Vegas, NV 89117	4.02535169073515	1.0986122886681098	0.0	0	2	0	1	1	0	0.0	0.0	0.0	0.0	0.0	0.0	0.0	0.0	1.0	0.0	0.0	0.0	0.0	0.0	0.0	0.0	1.0	0.0	0.0	0.0	0.0	0.0	0.0	0.0	0.0	0.0	0.0	0	0	0	0	0
Phoenix	13.688312744825183	17.343226909219837	11.303674360543646	33.57323579999999	-112.10010690000001	Sonic Drive-In	AZ	9606 N 19th Ave Phoenix, AZ 85021	4.2626798770413155	2.1972245773362196	0.0	0	2	0	1	0	0	0.0	1.0	1.0	1.0	0.0	0.0	0.0	1.0	1.0	0.0	0.0	0.0	0.0	0.0	1.0	0.0	0.0	0.0	0.0	0.0	0.0	0.0	0.0	0.0	0.0	0.0	0.0	1	0	1	0	0
Las Vegas	2.1303382311260535	9.304897035497774	6.464819409056252	36.1724640670741	-115.158335343003	JMac Productions	NV	Downtown Las Vegas, NV	0.0	0.0	0.0	0	2	0	1	0	0	0.0	0.0	0.0	0.0	0.0	0.0	0.0	0.0	0.0	0.0	0.0	0.0	0.0	0.0	0.0	0.0	0.0	0.0	0.0	0.0	0.0	0.0	0.0	0.0	0.0	0.0	0.0	0	0	0	0	0
Phoenix	6.871428761177118	9.973791219541623	4.161974695562496	33.5131838	-112.0654154	Floral Keepsakes	AZ	5202 N 7th St Phoenix, AZ 85014	0.0	0.0	0.0	0	2	0	1	3	0	0.0	0.0	0.0	0.0	0.0	0.0	0.0	0.0	1.0	0.0	0.0	0.0	0.0	0.0	0.0	0.0	0.0	0.0	1.0	0.0	0.0	0.0	0.0	0.0	0.0	0.0	0.0	0	0	0	0	0
Edinburgh	0.33355607404571813	10.685100146613781	1.1334725188697896	55.956236600000004	-3.1878266	Cafe Camino	EDH	St Mary's Cathedral York Place New Town Edinburgh EH1 3JD	2.0794415416798357	0.6931471805599453	0.0	0	2	0	1	0	0	0.0	0.0	0.0	0.0	0.0	0.0	0.0	0.0	1.0	0.0	0.0	0.0	0.0	0.0	0.0	0.0	0.0	0.0	0.0	0.0	0.0	0.0	0.0	0.0	0.0	0.0	0.0	0	0	0	0	0
Phoenix	27.71005982550303	30.471932822090082	25.171728103490917	33.700443	-112.10233799999999	Safelite AutoGlass	AZ	23610 N 20th Dr Phoenix, AZ 85085	2.1972245773362196	0.6931471805599453	0.0	0	2	0	1	0	0	0.0	0.0	0.0	0.0	0.0	0.0	0.0	0.0	0.0	0.0	0.0	0.0	0.0	0.0	0.0	0.0	0.0	0.0	0.0	0.0	0.0	0.0	0.0	0.0	0.0	0.0	0.0	0	0	0	0	0
Phoenix	7.359604986493757	0.9470062016772182	7.686801204082795	33.4352284	-111.99782730000001	Wendy's	AZ	3800 E Sky Harbor Blvd Phoenix, AZ 85034	3.970291913552122	2.1972245773362196	0.0	1	2	0	1	0	0	0.0	0.0	0.0	1.0	0.0	0.0	0.0	1.0	1.0	0.0	0.0	0.0	0.0	0.0	1.0	0.0	0.0	0.0	0.0	0.0	0.0	0.0	0.0	0.0	0.0	0.0	0.0	1	0	1	0	0
Phoenix	8.266909285184083	4.954103988764928	6.773271531890925	33.4801515	-111.99230320000001	SaBai Modern Thai	AZ	4121 E Thomas Rd Phoenix, AZ 85018	6.734591659972948	4.356708826689592	0.0	2	1	0	1	1	0	1.0	0.0	0.0	1.0	1.0	1.0	1.0	1.0	1.0	1.0	0.0	0.0	0.0	0.0	1.0	0.0	0.0	0.0	1.0	0.0	0.0	0.0	0.0	0.0	0.0	0.0	0.0	1	0	0	0	0
Las Vegas	1.9453999220976084	8.337693238684587	5.55158108632015	36.1638289	-115.1568419	The Cosmetics Company Store	NV	875 S Grand Central Pkwy Downtown Las Vegas, NV 89106	3.4339872044851463	1.9459101490553132	0.0	0	2	0	1	1	0	0.0	0.0	0.0	0.0	0.0	0.0	0.0	0.0	1.0	0.0	0.0	0.0	0.0	0.0	0.0	0.0	0.0	0.0	0.0	1.0	0.0	0.0	0.0	0.0	0.0	0.0	0.0	0	0	0	0	0
Pittsburgh	14.0778866992802	33.50900521271852	35.62311908755906	40.498083799999996	-79.8516542	Silky's Crows Nest	PA	19 River Rd Pittsburgh, PA 15215	3.4657359027997265	0.6931471805599453	0.0	0	1	0	1	1	1	0.0	1.0	0.0	1.0	1.0	0.0	1.0	1.0	1.0	0.0	1.0	0.0	0.0	0.0	1.0	0.0	0.0	0.0	1.0	0.0	0.0	1.0	0.0	0.0	1.0	0.0	0.0	1	0	0	1	0
Charlotte	8.413041427507338	24.386550482257164	6.089381475468877	35.147102000000004	-80.8311382	Carolina Beauty Bar	NC	4735 Sharon Rd South Park Charlotte, NC 28210	0.0	0.6931471805599453	0.0	0	2	0	1	0	0	0.0	0.0	0.0	0.0	0.0	0.0	0.0	0.0	1.0	0.0	0.0	0.0	0.0	0.0	0.0	0.0	0.0	0.0	0.0	1.0	0.0	0.0	0.0	0.0	0.0	0.0	0.0	0	0	0	0	0
Las Vegas	5.859197233639928	12.10065446451712	8.584445701132047	36.189999	-115.19428799999999	American Crown Circus - Circo Osorio	NV	4088 Pleasant Rd Las Vegas, NV 89108	0.0	0.6931471805599453	0.0	0	2	0	1	0	0	0.0	0.0	0.0	0.0	0.0	0.0	0.0	1.0	0.0	0.0	0.0	0.0	0.0	0.0	0.0	0.0	0.0	0.0	0.0	0.0	0.0	0.0	0.0	0.0	0.0	0.0	0.0	0	0	0	0	0
Las Vegas	10.926373166694237	16.628280088618585	12.863222255539144	36.215903999999995	-115.24110800000001	Supercuts	NV	3120 N Rainbow Blvd Rainbow Ridge Shopping Las Vegas, NV 89108	2.8903717578961645	0.6931471805599453	0.0	0	2	0	1	0	0	0.0	0.0	0.0	0.0	0.0	0.0	0.0	1.0	1.0	0.0	0.0	0.0	0.0	0.0	0.0	0.0	0.0	0.0	0.0	0.0	0.0	0.0	0.0	0.0	0.0	0.0	0.0	0	0	0	0	0
Pittsburgh	9.051277876895483	15.292948070266307	37.389951068344395	40.361089899999996	-79.9854816	South Hills Country Club	PA	4305 Brownsville Rd Pittsburgh, PA 15236	3.2188758248682006	1.0986122886681098	0.0	0	2	0	1	0	0	0.0	0.0	0.0	0.0	0.0	0.0	0.0	1.0	0.0	0.0	0.0	0.0	0.0	0.0	0.0	0.0	0.0	0.0	0.0	0.0	0.0	0.0	0.0	0.0	0.0	0.0	0.0	0	0	0	0	0
Las Vegas	13.431114803256682	14.71358907061998	11.107758398110764	36.154451	-115.28405	Wrich Air Cooling Heating	NV	1517 Merialdo Ln Westside Las Vegas, NV 89117	0.0	0.0	0.0	0	2	0	1	0	0	0.0	0.0	0.0	0.0	0.0	0.0	0.0	0.0	1.0	0.0	0.0	0.0	0.0	0.0	0.0	0.0	0.0	0.0	0.0	0.0	0.0	0.0	0.0	0.0	0.0	0.0	0.0	0	0	0	0	0
Las Vegas	1.9375545950581343	8.315712022770727	5.5345134212995335	36.1636462	-115.15670890000001	J.Crew Factory Store	NV	685 S. Grand Central Parkway Building 20, Suite 2001 Downtown Las Vegas, NV 89106	5.153291594497779	2.0794415416798357	0.0	0	2	0	1	1	0	0.0	0.0	0.0	0.0	0.0	0.0	0.0	0.0	1.0	0.0	0.0	0.0	0.0	0.0	0.0	0.0	0.0	0.0	0.0	1.0	0.0	0.0	0.0	0.0	0.0	0.0	0.0	0	0	0	0	0
Edinburgh	3.940935506449157	7.787469057995918	3.0602008358864463	55.9352998	-3.2426261000000003	Tynecastle Stadium	EDH	Gorgie Road Edinburgh EH11 2NL	2.70805020110221	0.6931471805599453	0.0	0	2	0	1	0	0	0.0	0.0	0.0	0.0	0.0	0.0	0.0	1.0	0.0	0.0	0.0	0.0	0.0	0.0	0.0	0.0	0.0	0.0	0.0	0.0	0.0	0.0	0.0	0.0	0.0	0.0	0.0	0	0	0	0	0
Las Vegas	15.538149189031262	18.621777227171947	14.838230457183583	36.1918291	-115.30561019999999	Thimbleberry House	NV	1990 Village Ctr Cir Ste 4 Summerlin Las Vegas, NV 89134	3.295836866004329	1.6094379124341003	0.0	0	2	0	1	1	0	1.0	0.0	0.0	0.0	0.0	0.0	0.0	0.0	1.0	0.0	0.0	0.0	0.0	0.0	0.0	0.0	0.0	0.0	1.0	0.0	0.0	0.0	0.0	0.0	0.0	0.0	0.0	0	0	0	0	0
Las Vegas	5.5098022952467876	12.285352237512045	11.520590793280745	36.188846000000005	-115.08053899999999	S&k Market	NV	1625 N Lamb Boulevard Sunrise Las Vegas, NV 89115	2.3978952727983707	0.0	0.0	0	2	0	1	0	0	0.0	0.0	0.0	0.0	0.0	0.0	0.0	0.0	0.0	0.0	0.0	0.0	0.0	0.0	0.0	0.0	0.0	0.0	0.0	0.0	0.0	0.0	0.0	0.0	0.0	0.0	0.0	0	0	0	0	0
Edinburgh	1.3881810515387416	9.365247181625852	0.6711273048669629	55.9504371	-3.2099151000000004	The Edinburgh Larder Bistro	EDH	1A Alva Street West End Edinburgh EH2 4PH	4.0943445622221	1.791759469228055	0.6931471805599453	2	1	0	0	1	0	0.0	0.0	0.0	1.0	0.0	1.0	1.0	0.0	1.0	1.0	0.0	0.0	0.0	0.0	0.0	0.0	1.0	0.0	0.0	0.0	0.0	0.0	0.0	0.0	0.0	0.0	0.0	1	0	0	0	0
Madison	2.18344832599414	10.7702506155914	2.1844662735503824	43.055619799999995	-89.3979035	King of Falafel and Grill	WI	1120 S Park St Bay Creek Madison, WI 53715	1.6094379124341003	0.6931471805599453	0.0	0	2	0	1	0	0	0.0	0.0	0.0	0.0	0.0	0.0	0.0	1.0	1.0	0.0	0.0	0.0	0.0	0.0	1.0	0.0	0.0	0.0	0.0	0.0	0.0	0.0	0.0	0.0	0.0	0.0	0.0	1	0	0	0	0
Edinburgh	2.813205199822987	13.335881157964598	3.3191668393873583	55.94212660000001	-3.1478382999999996	The Sheep Heid Inn	EDH	43-45 The Causeway Duddingston Edinburgh EH15 3QA	3.6375861597263857	2.0794415416798357	0.0	3	1	0	1	1	1	0.0	1.0	0.0	1.0	0.0	0.0	1.0	1.0	1.0	1.0	0.0	0.0	0.0	0.0	0.0	0.0	0.0	0.0	1.0	0.0	0.0	0.0	0.0	0.0	0.0	0.0	0.0	1	0	0	1	0
Las Vegas	8.899995715538706	5.041755826063441	2.5718243252161304	36.1029536	-115.19495970000001	Autobahn Auto	NV	4795 Wynn Rd Las Vegas, NV 89103	0.0	0.0	0.0	0	2	0	1	0	0	0.0	0.0	0.0	0.0	0.0	0.0	0.0	0.0	0.0	0.0	0.0	0.0	0.0	0.0	0.0	0.0	0.0	0.0	0.0	0.0	0.0	0.0	0.0	0.0	0.0	0.0	0.0	0	0	0	0	0
Las Vegas	2.34620634964346	7.117130856562645	4.4321700459009366	36.152931	-115.154954	Indie Flare Studios	NV	1551 S Commerce St Downtown Las Vegas, NV 89102	0.0	0.0	0.0	0	2	0	1	0	0	0.0	0.0	0.0	0.0	0.0	0.0	0.0	0.0	0.0	0.0	0.0	0.0	0.0	0.0	0.0	0.0	0.0	0.0	0.0	0.0	0.0	0.0	0.0	0.0	0.0	0.0	0.0	0	0	0	0	0
Las Vegas	12.787963835831702	11.13462149292914	8.183813995032034	36.113656899999995	-115.26148219999999	Dee's Donuts	NV	4135 S Buffalo Dr Spring Valley Las Vegas, NV 89147	4.110873864173311	2.302585092994046	0.0	0	2	0	1	0	0	0.0	0.0	0.0	0.0	0.0	0.0	0.0	0.0	1.0	0.0	0.0	0.0	0.0	0.0	0.0	0.0	0.0	0.0	1.0	0.0	0.0	0.0	0.0	0.0	0.0	0.0	0.0	0	0	0	0	0
Las Vegas	1.1343381829627501	9.362074114886882	7.618525112352762	36.17311	-115.125401	Sin City Dogs	NV	4262 Blue Diamond Rd 156-375 Las Vegas, NV 89139	2.3978952727983707	1.0986122886681098	0.0	0	2	0	1	0	0	0.0	0.0	0.0	1.0	0.0	0.0	0.0	1.0	1.0	0.0	0.0	0.0	0.0	0.0	1.0	0.0	0.0	0.0	0.0	0.0	0.0	0.0	0.0	0.0	0.0	0.0	0.0	1	0	0	0	0
Las Vegas	12.375642901014919	4.038647702792116	6.393608817491586	36.0577821	-115.16284850000001	Sinclair	NV	220 E Warm Springs Rd Southeast Las Vegas, NV 89119	4.007333185232471	2.3978952727983707	0.0	0	2	0	1	0	0	0.0	0.0	0.0	0.0	0.0	0.0	0.0	0.0	0.0	0.0	0.0	0.0	0.0	0.0	0.0	0.0	0.0	0.0	0.0	0.0	0.0	0.0	0.0	0.0	0.0	0.0	0.0	0	0	0	0	0
Las Vegas	16.798359543479545	10.45201638127952	10.282278912583244	36.0426927	-115.2419044	The UPS Store	NV	8020 S Rainbow Blvd Ste 100 Southwest Las Vegas, NV 89139	4.90527477843843	2.5649493574615367	0.0	0	2	0	1	0	0	0.0	0.0	0.0	0.0	0.0	0.0	0.0	0.0	1.0	0.0	0.0	0.0	0.0	0.0	0.0	0.0	0.0	0.0	0.0	0.0	0.0	0.0	0.0	0.0	0.0	0.0	0.0	0	0	0	0	0
Charlotte	18.677486138617436	38.3514946025694	18.92988041413917	35.1024249	-80.98469200000001	One Price Dry Cleaning	NC	14142 Rivergate Pkwy Steele Creek Charlotte, NC 28273	1.9459101490553132	0.6931471805599453	0.0	0	2	0	1	2	0	0.0	0.0	0.0	0.0	0.0	0.0	0.0	0.0	1.0	0.0	0.0	0.0	0.0	0.0	0.0	0.0	0.0	0.0	0.0	0.0	0.0	0.0	0.0	0.0	0.0	0.0	0.0	0	0	0	0	0
Phoenix	13.998020155024383	20.409921375495145	14.51894851917575	33.4806244	-112.22107530000001	Panda Express	AZ	7510 W Thomas Rd Phoenix, AZ 85033	3.1354942159291497	1.6094379124341003	0.0	0	2	0	1	0	0	0.0	0.0	0.0	1.0	0.0	1.0	0.0	1.0	1.0	0.0	0.0	0.0	0.0	0.0	1.0	0.0	0.0	0.0	0.0	0.0	0.0	0.0	0.0	0.0	0.0	0.0	0.0	1	0	0	0	0
Madison	10.735542540504557	17.05414941121428	9.88515372719285	43.067894700000004	-89.5241642	MO'Wyz Dry Cleaners	WI	362 Junction Rd Junction Ridge Madison, WI 53717	0.0	0.0	0.0	0	2	0	0	1	0	0.0	0.0	0.0	0.0	0.0	0.0	0.0	0.0	1.0	0.0	0.0	0.0	0.0	0.0	0.0	0.0	0.0	0.0	0.0	0.0	0.0	0.0	0.0	0.0	0.0	0.0	0.0	0	0	0	0	0
Las Vegas	5.765350261707455	6.795063876772362	7.7241031284194035	36.1326909	-115.08759740000002	A-Team Motorcycles	NV	4020 Boulder Hwy Las Vegas, NV 89121	3.044522437723423	1.3862943611198906	0.0	0	2	0	1	0	0	0.0	0.0	0.0	0.0	0.0	0.0	0.0	0.0	0.0	0.0	0.0	0.0	0.0	0.0	0.0	0.0	0.0	0.0	0.0	0.0	0.0	0.0	0.0	0.0	0.0	0.0	0.0	0	0	0	0	0
Madison	0.9092746787388074	8.288188573778093	1.7619552073074891	43.074727	-89.3815378	The Tipsy Cow	WI	102 King St Capitol Madison, WI 53703	6.456769655572163	3.4011973816621555	1.0986122886681098	0	1	0	0	1	1	0.0	1.0	0.0	1.0	1.0	0.0	1.0	0.0	1.0	0.0	1.0	0.0	0.0	0.0	1.0	0.0	1.0	0.0	0.0	1.0	0.0	0.0	0.0	0.0	0.0	0.0	0.0	1	0	0	1	0
Phoenix	9.0553378838913	5.231912269449243	7.630048618262519	33.4797929	-111.9830363	Cartridge World	AZ	4539 East Thomas Rd Ste 102 Phoenix, AZ 85018	1.791759469228055	0.0	0.0	0	2	0	1	1	0	0.0	0.0	0.0	0.0	0.0	0.0	0.0	0.0	1.0	0.0	0.0	0.0	0.0	0.0	0.0	0.0	0.0	0.0	0.0	0.0	0.0	0.0	0.0	0.0	0.0	0.0	0.0	0	0	0	0	0
Edinburgh	5.549938625191911	16.023034637710158	6.041445875759731	55.9330760881034	-3.10704601258371	Boots	EDH	1 Fort Retail Park Lawhouse Toll Edinburgh EH15 3RH	1.9459101490553132	0.6931471805599453	0.0	0	2	0	1	0	0	0.0	0.0	0.0	0.0	0.0	0.0	0.0	0.0	1.0	0.0	0.0	0.0	0.0	0.0	0.0	0.0	0.0	0.0	0.0	0.0	0.0	0.0	0.0	0.0	0.0	0.0	0.0	0	0	0	0	0
Pittsburgh	11.042901683765809	30.69749357254658	36.92875222747673	40.488538	-79.885471	la Cappella	PA	1041 Freeport Rd Pittsburgh, PA 15238	3.332204510175204	1.3862943611198906	0.0	0	1	0	0	1	0	1.0	1.0	0.0	1.0	1.0	1.0	1.0	1.0	1.0	1.0	1.0	0.0	0.0	0.0	1.0	0.0	0.0	0.0	1.0	0.0	0.0	0.0	0.0	0.0	0.0	0.0	0.0	1	0	0	0	0
Las Vegas	12.6416163840195	11.211361834559131	8.180964701152408	36.116509	-115.261451	Ahmed Hassan	NV	4001 S Buffalo Rd Spring Valley Las Vegas, NV 89147	0.0	0.6931471805599453	0.0	0	2	0	1	2	0	0.0	0.0	0.0	0.0	0.0	0.0	0.0	1.0	1.0	0.0	0.0	0.0	0.0	0.0	0.0	0.0	0.0	0.0	0.0	0.0	0.0	0.0	0.0	0.0	0.0	0.0	0.0	0	0	0	0	0
Madison	4.769230916165566	12.80814563265882	4.963670826858244	43.0324123	-89.3843206	Isthmus Tutoring	WI	Madison, WI 53713	0.0	0.0	0.0	0	2	0	1	0	0	0.0	0.0	0.0	0.0	0.0	0.0	0.0	0.0	0.0	0.0	0.0	0.0	0.0	0.0	0.0	0.0	0.0	0.0	0.0	0.0	0.0	0.0	0.0	0.0	0.0	0.0	0.0	0	0	0	0	0
Phoenix	19.555567748795205	20.81265165954699	16.774209404377395	33.6240766	-112.0302603	Loft Again	AZ	15015 N Cave Creek Rd Phoenix, AZ 85032	3.1354942159291497	1.3862943611198906	0.0	1	1	0	1	0	1	0.0	0.0	0.0	1.0	1.0	0.0	0.0	0.0	1.0	0.0	1.0	1.0	0.0	0.0	0.0	0.0	0.0	0.0	1.0	0.0	0.0	0.0	0.0	0.0	1.0	0.0	0.0	0	0	0	1	0
Edinburgh	0.06519504863835215	10.621751304386605	0.8229181133351173	55.953013070975	-3.1892206074315	The Balmoral Bar	EDH	1 Princes Street Old Town Edinburgh EH2 2EQ	3.4011973816621555	0.0	0.0	0	1	0	1	3	0	0.0	0.0	0.0	1.0	0.0	0.0	0.0	0.0	1.0	0.0	0.0	0.0	0.0	0.0	0.0	1.0	0.0	0.0	0.0	0.0	0.0	0.0	0.0	0.0	0.0	0.0	1.0	0	0	0	1	0
Las Vegas	14.009204817158748	16.12657262103905	12.420043520408122	36.169345	-115.29128200000001	Oyster Bar	NV	Suncoast Hotel & Casino 9090 Alta Dr Westside Las Vegas, NV 89145	3.828641396489095	2.302585092994046	0.0	0	1	0	1	1	0	0.0	0.0	0.0	0.0	1.0	0.0	1.0	0.0	1.0	0.0	0.0	0.0	0.0	0.0	1.0	0.0	0.0	0.0	1.0	0.0	0.0	0.0	0.0	0.0	0.0	0.0	0.0	1	0	0	0	0
Phoenix	14.600218142945167	10.383203042298662	16.34811801684603	33.346740999999994	-111.97977900000001	Bear 2 Protection	AZ	11011 S 48th St Phoenix, AZ 85044	0.0	0.0	0.0	0	2	0	1	0	0	0.0	0.0	0.0	0.0	0.0	0.0	0.0	0.0	1.0	0.0	0.0	0.0	0.0	0.0	0.0	0.0	0.0	0.0	0.0	0.0	0.0	0.0	0.0	0.0	0.0	0.0	0.0	0	0	0	0	0
Madison	7.474979048143973	14.619917937655309	6.640279380410761	43.061881	-89.482739	Cuna Mutual Insurance Society	WI	5910 Mineral Point Rd Faircrest Madison, WI 53705	5.342334251964811	0.0	0.0	0	2	0	1	0	0	0.0	0.0	0.0	0.0	0.0	0.0	0.0	0.0	0.0	0.0	0.0	0.0	0.0	0.0	0.0	0.0	0.0	0.0	0.0	0.0	0.0	0.0	0.0	0.0	0.0	0.0	0.0	0	0	0	0	0
Phoenix	25.047300599229278	26.33469840954947	22.281388491216116	33.674189	-112.028304	Unique Building Concepts	AZ	2514 E Mohawk Ln Ste 101 Phoenix, AZ 85050	0.0	0.0	0.0	0	2	0	1	1	0	0.0	0.0	0.0	0.0	0.0	0.0	0.0	0.0	1.0	0.0	0.0	0.0	0.0	0.0	0.0	0.0	0.0	0.0	0.0	0.0	0.0	0.0	0.0	0.0	0.0	0.0	0.0	0	0	0	0	0
Las Vegas	3.1439236152476964	8.397564168158794	7.808039795790426	36.158463	-115.102322	Santa Barbara Upholstery & Supplies	NV	3319 E Charleston Blvd Downtown Las Vegas, NV 89104	0.0	0.0	0.0	0	2	0	1	0	0	0.0	0.0	0.0	0.0	0.0	0.0	0.0	0.0	1.0	0.0	0.0	0.0	0.0	0.0	0.0	0.0	0.0	0.0	0.0	0.0	0.0	0.0	0.0	0.0	0.0	0.0	0.0	0	0	0	0	0
Las Vegas	15.449061484970757	15.983936277155355	12.571162897336636	36.145343100000005	-115.3051747	Las Vegas-Clark County Library System - Sahara West Library	NV	9600 West Sahara Ave Westside Las Vegas, NV 89117	6.838405200847344	3.58351893845611	0.0	0	2	0	0	0	0	0.0	0.0	0.0	0.0	0.0	0.0	0.0	0.0	0.0	0.0	0.0	0.0	0.0	0.0	0.0	0.0	0.0	0.0	0.0	0.0	0.0	0.0	0.0	0.0	0.0	0.0	0.0	0	0	0	0	0
Las Vegas	2.8450801262529524	6.312749147300455	3.7540962595579823	36.145815999999996	-115.15323000000001	It's Paradise Boutique	NV	2029 Paradise Rd Downtown Las Vegas, NV 89104	0.0	0.6931471805599453	0.0	0	2	0	1	0	0	0.0	0.0	0.0	0.0	0.0	0.0	0.0	0.0	1.0	0.0	0.0	0.0	0.0	0.0	0.0	0.0	0.0	0.0	0.0	0.0	0.0	0.0	0.0	0.0	0.0	0.0	0.0	0	0	0	0	0
Phoenix	22.563080380523783	22.505068491085233	19.772254355271762	33.638907	-111.97943500000001	Starbucks	AZ	4747 E Bell Rd Ste 11 Phoenix, AZ 85032	5.749392985908253	1.6094379124341003	0.0	0	2	0	0	1	0	0.0	1.0	0.0	0.0	0.0	0.0	0.0	0.0	1.0	0.0	0.0	0.0	0.0	0.0	0.0	0.0	0.0	0.0	1.0	0.0	0.0	0.0	0.0	0.0	0.0	0.0	0.0	0	0	0	0	0
Phoenix	7.093207396952892	8.55287183611735	4.331472161412062	33.5092195	-112.0411403	Stacy's Hallmark	AZ	1925 E Camelback Rd Ste 134 Phoenix, AZ 85016	3.5263605246161616	1.0986122886681098	0.0	0	2	0	1	2	0	0.0	0.0	0.0	0.0	0.0	0.0	0.0	0.0	1.0	0.0	0.0	0.0	0.0	0.0	0.0	0.0	0.0	0.0	1.0	0.0	0.0	0.0	0.0	0.0	0.0	0.0	0.0	0	0	0	0	0
Las Vegas	6.600100192917882	10.605006960171027	10.96333999166126	36.1608317	-115.062655	In-N-Out Burger	NV	51 N Nellis Blvd Sunrise Las Vegas, NV 89110	6.025865973825314	3.258096538021482	0.0	0	2	0	1	0	0	0.0	1.0	1.0	1.0	0.0	0.0	0.0	1.0	1.0	0.0	0.0	0.0	0.0	0.0	1.0	0.0	0.0	0.0	1.0	0.0	0.0	0.0	0.0	0.0	0.0	0.0	0.0	1	0	1	0	0
Phoenix	18.60643601489657	18.29921143037754	15.842367602306028	33.6011167	-111.9834389	Opa! Souvlaki	AZ	4568 E Cactus Rd Phoenix, AZ 85073	1.791759469228055	1.3862943611198906	0.0	0	2	0	1	0	0	0.0	0.0	0.0	0.0	0.0	0.0	0.0	0.0	1.0	0.0	0.0	0.0	0.0	0.0	0.0	0.0	0.0	0.0	0.0	0.0	0.0	0.0	0.0	0.0	0.0	0.0	0.0	1	0	0	0	0
Las Vegas	4.598749879466664	5.056085506585612	2.0046300274864874	36.1319251	-115.16262409999999	Haunted Vegas Tours	NV	The Royal Resort 99 Convention Center Dr The Strip Las Vegas, NV 89109	2.1972245773362196	0.0	0.0	0	2	0	1	0	0	0.0	0.0	0.0	0.0	0.0	0.0	0.0	0.0	0.0	0.0	0.0	0.0	0.0	0.0	0.0	0.0	0.0	0.0	0.0	0.0	0.0	0.0	0.0	0.0	0.0	0.0	0.0	0	0	0	0	0
Charlotte	13.639595819045045	32.899599275405635	13.410121824155675	35.121179	-80.925803	The Swedish Connection	NC	1325 Continental Blvd Steele Creek Charlotte, NC 28273	0.0	0.0	0.0	0	2	0	1	0	0	0.0	0.0	0.0	0.0	0.0	0.0	0.0	0.0	0.0	0.0	0.0	0.0	0.0	0.0	0.0	0.0	0.0	0.0	0.0	0.0	0.0	0.0	0.0	0.0	0.0	0.0	0.0	0	0	0	0	0
Las Vegas	12.152196919086153	7.615576673588795	5.947885518637226	36.0856168	-115.2257978	Tax Wizards	NV	5697 S Jones Blvd Ste 220 Spring Valley Las Vegas, NV 89118	0.0	0.6931471805599453	0.0	0	2	0	1	0	0	0.0	0.0	0.0	0.0	0.0	0.0	0.0	0.0	0.0	0.0	0.0	0.0	0.0	0.0	0.0	0.0	0.0	0.0	0.0	0.0	0.0	0.0	0.0	0.0	0.0	0.0	0.0	0	0	0	0	0
Madison	13.550327264972257	19.957157501236004	12.706162942342925	43.0580445	-89.5574615	Full Compass Systems	WI	9770 Silicon Prairie Pkwy Madison, WI 53593	1.6094379124341003	0.6931471805599453	0.0	0	2	0	1	1	0	0.0	0.0	0.0	0.0	0.0	0.0	0.0	0.0	1.0	0.0	0.0	0.0	0.0	0.0	0.0	0.0	0.0	0.0	1.0	0.0	0.0	0.0	0.0	0.0	0.0	0.0	0.0	0	0	0	0	0
Phoenix	13.804025390955951	8.130297940906244	12.880782959530512	33.4655279851654	-111.926935812598	24/7 Locksmith on Call	AZ	Phoenix, AZ 85257	0.0	0.6931471805599453	0.0	0	2	0	1	0	0	0.0	0.0	0.0	0.0	0.0	0.0	0.0	0.0	1.0	0.0	0.0	0.0	0.0	0.0	0.0	0.0	0.0	0.0	0.0	0.0	0.0	0.0	0.0	0.0	0.0	0.0	0.0	0	0	0	0	0
Phoenix	24.32595566004584	25.649438693091565	21.56126254400574	33.6678675	-112.03023049999999	Combat Bugs	AZ	20021 N Cave Creek Rd Phoenix, AZ 85024	0.0	0.0	0.0	0	2	0	1	0	0	0.0	0.0	0.0	0.0	0.0	0.0	0.0	0.0	1.0	0.0	0.0	0.0	0.0	0.0	0.0	0.0	0.0	0.0	0.0	0.0	0.0	0.0	0.0	0.0	0.0	0.0	0.0	0	0	0	0	0
Las Vegas	8.313804827532174	13.198368541869236	9.411597394634107	36.1877813	-115.224425	Today's Dental & Oral Surgery	NV	1471 N Jones Blvd Las Vegas, NV 89108	1.791759469228055	0.6931471805599453	0.0	0	2	0	1	0	0	0.0	0.0	0.0	0.0	0.0	0.0	0.0	0.0	0.0	0.0	0.0	0.0	0.0	0.0	0.0	0.0	0.0	0.0	0.0	0.0	0.0	0.0	0.0	0.0	0.0	0.0	0.0	0	0	0	0	0
Phoenix	13.225213454611627	15.725597118212045	10.54016486245846	33.5706908	-112.06532250000001	Cardinal Pizza	AZ	9226 N 7th Street Phoenix, AZ 85020	0.0	0.6931471805599453	0.0	0	2	0	1	0	0	0.0	0.0	0.0	0.0	1.0	0.0	1.0	1.0	0.0	0.0	0.0	0.0	0.0	0.0	1.0	0.0	0.0	0.0	0.0	0.0	0.0	0.0	0.0	0.0	0.0	0.0	0.0	1	0	0	0	1
Las Vegas	9.65031306674992	16.334250271474847	12.740727703936686	36.2234468	-115.2173307	Kerry's Sports Pub Pizza & Grill	NV	3520 N Rancho Dr Northwest Las Vegas, NV 89130	3.9889840465642745	1.9459101490553132	0.6931471805599453	1	2	0	1	0	2	0.0	0.0	0.0	1.0	1.0	0.0	1.0	0.0	0.0	0.0	0.0	0.0	0.0	0.0	0.0	0.0	0.0	0.0	0.0	0.0	0.0	0.0	0.0	0.0	0.0	0.0	0.0	1	0	0	1	1
Madison	10.681513799491123	4.241626715043312	11.356363638277449	43.135442	-89.290761	Uno Pizzeria & Grill	WI	3010 Crossroads Drive High Crossing Madison, WI 53718	4.820281565605037	1.3862943611198906	0.0	0	1	0	0	1	0	1.0	1.0	0.0	1.0	1.0	0.0	1.0	1.0	1.0	1.0	0.0	0.0	0.0	0.0	1.0	0.0	0.0	0.0	1.0	0.0	0.0	0.0	0.0	0.0	0.0	0.0	0.0	1	0	0	0	1
Charlotte	4.81251565705422	31.723797279696164	8.256980817973812	35.256008200000004	-80.874576	Chicken King	NC	3222 Rozzelles Ferry Rd Charlotte, NC 28208	1.9459101490553132	2.0794415416798357	0.0	2	2	0	1	0	0	0.0	0.0	0.0	0.0	0.0	0.0	0.0	1.0	1.0	0.0	0.0	0.0	0.0	0.0	1.0	0.0	0.0	0.0	0.0	0.0	0.0	0.0	0.0	0.0	0.0	0.0	0.0	1	0	0	0	0
Phoenix	10.234659506127038	5.923116698370718	8.85786081856093	33.4803502	-111.9698423	Di Vito's Pizza	AZ	5134 E Thomas Rd Phoenix, AZ 85018	4.454347296253507	2.4849066497880004	0.0	2	2	0	1	0	0	1.0	0.0	0.0	1.0	1.0	1.0	0.0	1.0	1.0	0.0	0.0	0.0	0.0	0.0	1.0	0.0	0.0	0.0	0.0	0.0	0.0	0.0	0.0	0.0	0.0	0.0	0.0	1	0	0	0	1
Edinburgh	1.4872942091460053	11.35744383960631	1.4901212026492225	55.94062579999999	-3.1804907000000004	Newington Post Office	EDH	41 S Clerk Street Newington Edinburgh EH8	2.0794415416798357	0.6931471805599453	0.0	0	2	0	1	0	0	0.0	0.0	0.0	0.0	0.0	0.0	0.0	0.0	0.0	0.0	0.0	0.0	0.0	0.0	0.0	0.0	0.0	0.0	0.0	0.0	0.0	0.0	0.0	0.0	0.0	0.0	0.0	0	0	0	0	0
Phoenix	4.299992456140931	3.2233450951399982	5.969487798928664	33.426196999999995	-112.039671	Arizona Shuttle	AZ	1950 E Watkins Ste 160 Phoenix, AZ 85034	2.70805020110221	1.0986122886681098	0.0	0	2	0	1	0	0	0.0	0.0	0.0	0.0	0.0	0.0	0.0	0.0	0.0	0.0	0.0	0.0	0.0	0.0	0.0	0.0	0.0	0.0	0.0	0.0	0.0	0.0	0.0	0.0	0.0	0.0	0.0	0	0	0	0	0
Charlotte	18.69274789293036	27.077983920285163	16.51365641299221	35.054139299999996	-80.8490182	Melissa Brown - Helen Adams Realty	NC	15235 John J Delaney Dr Ballantyne Charlotte, NC 28277	0.0	0.0	0.0	0	2	0	1	0	0	0.0	0.0	0.0	0.0	0.0	0.0	0.0	0.0	0.0	0.0	0.0	0.0	0.0	0.0	0.0	0.0	0.0	0.0	0.0	0.0	0.0	0.0	0.0	0.0	0.0	0.0	0.0	0	0	0	0	0
Phoenix	17.0884524332531	13.305386758358726	19.026521347769503	33.3197406	-111.9796966	Lakeshore Learning Store	AZ	4819 E Ray Rd Phoenix, AZ 85044	4.454347296253507	1.3862943611198906	0.0	0	2	0	1	1	0	0.0	0.0	0.0	0.0	0.0	0.0	0.0	0.0	1.0	0.0	0.0	0.0	0.0	0.0	0.0	0.0	0.0	0.0	1.0	0.0	0.0	0.0	0.0	0.0	0.0	0.0	0.0	0	0	0	0	0
Las Vegas	7.686091865618696	1.2160840058238656	2.6495327258345873	36.09871	-115.1491534	Dream Car Rentals	NV	5050 Paradise Rd Southeast Las Vegas, NV 89119	1.6094379124341003	0.6931471805599453	0.0	0	2	0	1	0	0	0.0	0.0	0.0	0.0	0.0	0.0	0.0	0.0	0.0	0.0	0.0	0.0	0.0	0.0	0.0	0.0	0.0	0.0	0.0	0.0	0.0	0.0	0.0	0.0	0.0	0.0	0.0	0	0	0	0	0
Las Vegas	12.245976687900216	16.501792502387385	12.653637847935892	36.1988542	-115.2659777	Pure Serenity Therapeutic Massage	NV	Summerlin Las Vegas, NV 89128	0.0	0.0	0.0	0	2	0	1	0	0	0.0	0.0	0.0	0.0	0.0	0.0	0.0	0.0	0.0	0.0	0.0	0.0	0.0	0.0	0.0	0.0	0.0	0.0	0.0	0.0	0.0	0.0	0.0	0.0	0.0	0.0	0.0	0	0	0	0	0
Phoenix	0.416255992352227	6.333244896610672	3.201613979496112	33.4479482627	-112.074616714	Chipotle Mexican Grill	AZ	11 W Washington St Ste 140 Phoenix, AZ 85003	6.375024819828097	3.1354942159291497	0.0	0	0	0	1	0	0	0.0	1.0	0.0	1.0	0.0	1.0	0.0	1.0	1.0	0.0	0.0	0.0	0.0	0.0	1.0	0.0	0.0	0.0	0.0	1.0	0.0	0.0	0.0	0.0	0.0	0.0	0.0	1	0	1	0	0
Las Vegas	16.90776942620298	8.507281134228498	12.016972771292922	36.0153561	-115.1185146	True Island BBQ	NV	9550 S Eastern Ave Ste 195 Southeast Las Vegas, NV 89123	0.0	0.6931471805599453	0.0	0	2	0	1	0	0	0.0	1.0	0.0	1.0	0.0	0.0	0.0	1.0	1.0	0.0	0.0	0.0	0.0	0.0	1.0	0.0	0.0	0.0	1.0	0.0	0.0	0.0	0.0	0.0	0.0	0.0	0.0	1	0	0	0	0
Charlotte	0.54875683442741	27.693002424496292	3.9258611576107243	35.227340500000004	-80.8422396	Yeager Chiropractic & Wellness Center	NC	100 N Tryon St Ste 165 First Ward Charlotte, NC 28202	0.0	0.0	0.0	0	2	0	1	0	0	0.0	0.0	0.0	0.0	0.0	0.0	0.0	0.0	0.0	0.0	0.0	0.0	0.0	0.0	0.0	0.0	0.0	0.0	0.0	0.0	0.0	0.0	0.0	0.0	0.0	0.0	0.0	0	0	0	0	0
Las Vegas	4.491679455812393	4.175757634464699	2.7056251227684456	36.12728370000001	-115.14459769999999	Dukem Ethiopian Restaurant	NV	870 Sierra Vista Dr Ste 1-2 Eastside Las Vegas, NV 89169	2.5649493574615367	1.0986122886681098	0.0	0	1	0	0	1	0	0.0	0.0	0.0	1.0	1.0	0.0	1.0	1.0	1.0	1.0	0.0	0.0	0.0	0.0	1.0	0.0	0.0	0.0	0.0	0.0	0.0	0.0	0.0	0.0	0.0	0.0	0.0	1	0	0	0	0
Las Vegas	16.618274451002502	23.254664159522886	19.550998656696585	36.2735140645389	-115.26565438738899	Centennial Hyundai	NV	6200 Centennial Center Blvd Centennial Las Vegas, NV 89149	4.007333185232471	2.0794415416798357	0.0	0	2	0	1	0	0	0.0	0.0	0.0	0.0	0.0	0.0	0.0	0.0	0.0	0.0	0.0	0.0	0.0	0.0	0.0	0.0	0.0	0.0	0.0	0.0	0.0	0.0	0.0	0.0	0.0	0.0	0.0	0	0	0	0	0
Las Vegas	5.580017730356682	10.472859791096512	6.813737336405742	36.172531899999996	-115.197258	Zales	NV	4300 Meadows Ln Westside Las Vegas, NV 89107	0.0	0.0	0.0	0	2	0	1	2	0	0.0	0.0	0.0	0.0	0.0	0.0	0.0	0.0	1.0	0.0	0.0	0.0	0.0	0.0	0.0	0.0	0.0	0.0	0.0	0.0	0.0	0.0	0.0	0.0	0.0	0.0	0.0	0	0	0	0	0
Madison	4.588820954774198	5.528076318874623	5.362600157898617	43.093644	-89.342483	Daisy Cafe and Cupcakery	WI	2827 Atwood Ave Schenk - Atwood Madison, WI 53704	5.4510384535657	2.772588722239781	1.0986122886681098	0	0	0	0	1	0	1.0	0.0	0.0	1.0	0.0	1.0	1.0	1.0	1.0	1.0	0.0	0.0	0.0	0.0	1.0	0.0	1.0	0.0	1.0	0.0	0.0	0.0	0.0	0.0	0.0	0.0	0.0	1	0	0	0	0
Phoenix	33.46710583199565	33.91902888361317	30.669350015388627	33.742082	-111.97652	Black Mountain Nursery	AZ	4840 E Dynamite Blvd Phoenix, AZ 85331	0.0	0.0	0.0	0	2	0	1	0	0	0.0	0.0	0.0	0.0	0.0	0.0	0.0	0.0	0.0	0.0	0.0	0.0	0.0	0.0	0.0	0.0	0.0	0.0	0.0	0.0	0.0	0.0	0.0	0.0	0.0	0.0	0.0	0	0	0	0	0
Phoenix	21.587744654629983	22.38719115255185	18.79067974838619	33.6391935	-112.0121148	Madras Ananda Bhavan	AZ	3227 E Bell Rd Ste D105 Phoenix, AZ 85032	5.5254529391317835	3.58351893845611	0.0	0	2	0	1	1	0	0.0	0.0	0.0	1.0	0.0	1.0	1.0	1.0	1.0	1.0	0.0	0.0	0.0	0.0	1.0	0.0	0.0	0.0	1.0	0.0	0.0	0.0	0.0	0.0	0.0	0.0	0.0	1	0	0	0	0
Pittsburgh	6.707431704562228	24.525695200874495	35.873569248026826	40.436347999999995	-79.921667	Marvista Rentals	PA	5825 Bartlett St Squirrel Hill Pittsburgh, PA 15217	0.0	0.0	0.0	0	2	0	1	0	0	0.0	0.0	0.0	0.0	0.0	0.0	0.0	0.0	0.0	0.0	0.0	0.0	0.0	0.0	0.0	0.0	0.0	0.0	0.0	0.0	0.0	0.0	0.0	0.0	0.0	0.0	0.0	0	0	0	0	0
Las Vegas	16.797690065117784	8.420223259248631	11.954391744233405	36.016461	-115.11711670000001	Devanna Love Boutique	NV	9500 S Eastern Ave Ste 140 Las Vegas, NV 89123	0.0	0.6931471805599453	0.0	0	2	0	1	2	0	0.0	0.0	0.0	0.0	0.0	0.0	0.0	0.0	1.0	0.0	0.0	0.0	0.0	0.0	0.0	0.0	0.0	0.0	0.0	0.0	0.0	0.0	0.0	0.0	0.0	0.0	0.0	0	0	0	0	0
Phoenix	21.714129132086203	22.462988566757563	18.915969807251898	33.639900899999994	-112.0100999	Chuck E Cheese's	AZ	3329 E Bell Rd Ste 15 Phoenix, AZ 85032	3.9512437185814275	1.9459101490553132	0.0	0	2	0	1	1	0	0.0	0.0	0.0	1.0	0.0	0.0	0.0	1.0	1.0	1.0	0.0	0.0	0.0	0.0	0.0	0.0	0.0	0.0	0.0	0.0	0.0	0.0	0.0	0.0	0.0	0.0	0.0	1	0	0	0	1
Madison	9.397290731517186	16.749357496534746	8.587363532071404	43.049545	-89.5027583	Harold's Chicken	WI	707 S Gammon Rd Madison, WI 53719	2.833213344056216	2.1972245773362196	0.6931471805599453	0	2	0	1	0	0	0.0	0.0	0.0	1.0	1.0	1.0	0.0	1.0	1.0	0.0	0.0	0.0	0.0	0.0	1.0	0.0	0.0	0.0	1.0	0.0	0.0	0.0	0.0	0.0	0.0	0.0	0.0	1	0	0	0	0
Pittsburgh	2.1917116959728538	20.321492088193633	39.833084441075044	40.4289899	-79.9807488	Delanie's Coffee	PA	1737 E Carson St South Side Pittsburgh, PA 15203	5.209486152841421	3.1354942159291497	1.0986122886681098	0	2	0	0	0	0	0.0	0.0	0.0	0.0	0.0	0.0	0.0	0.0	1.0	0.0	0.0	0.0	0.0	0.0	0.0	0.0	1.0	0.0	0.0	0.0	0.0	0.0	0.0	0.0	0.0	0.0	0.0	0	0	0	0	0
Phoenix	2.714677698789344	9.04880668708337	3.458468569197151	33.4642207	-112.09959040000001	Six Points Hardware	AZ	1409 N 19th Ave Phoenix, AZ 85009	2.5649493574615367	1.0986122886681098	0.0	0	2	0	1	1	0	0.0	0.0	0.0	0.0	0.0	0.0	0.0	0.0	1.0	0.0	0.0	0.0	0.0	0.0	0.0	0.0	0.0	0.0	0.0	0.0	0.0	0.0	0.0	0.0	0.0	0.0	0.0	0	0	0	0	0
Charlotte	15.571982788767933	26.60144439338665	13.512019921294947	35.082432	-80.852013	All Shine No Grime Mobile Detailing	NC	10911 Carmel Crossing Rd Charlotte, NC 28226	0.0	0.0	0.0	0	2	0	1	0	0	0.0	0.0	0.0	0.0	0.0	0.0	0.0	0.0	0.0	0.0	0.0	0.0	0.0	0.0	0.0	0.0	0.0	0.0	0.0	0.0	0.0	0.0	0.0	0.0	0.0	0.0	0.0	0	0	0	0	0
Phoenix	43.964095562625445	46.7052198476656	41.45753787643087	33.8448745	-112.13458419999999	Precise Pest Solutions	AZ	39506 N Daisy Mountain Dr Ste 122-230 Phoenix, AZ 85086	0.0	0.0	0.0	0	2	0	1	0	0	0.0	0.0	0.0	0.0	0.0	0.0	0.0	0.0	1.0	0.0	0.0	0.0	0.0	0.0	0.0	0.0	0.0	0.0	0.0	0.0	0.0	0.0	0.0	0.0	0.0	0.0	0.0	0	0	0	0	0
Las Vegas	7.790658741585191	3.1794383169463516	1.288776552998876	36.1035296	-115.1723424	La Salsa Cantina	NV	3785 Las Vegas Blvd S The Strip Las Vegas, NV 89109	6.267200548541362	3.5263605246161616	0.0	0	1	0	1	1	0	0.0	0.0	0.0	1.0	1.0	0.0	1.0	1.0	1.0	0.0	0.0	0.0	0.0	0.0	1.0	0.0	0.0	0.0	0.0	1.0	0.0	0.0	0.0	0.0	0.0	0.0	0.0	1	0	0	0	0
Las Vegas	14.055028764302245	12.596766216931616	9.654307361383983	36.1148054	-115.27783170000001	The WoW Factor!	NV	Spring Valley Las Vegas, NV 89147	0.0	0.0	0.0	0	2	0	1	1	0	0.0	0.0	0.0	0.0	0.0	0.0	0.0	0.0	1.0	0.0	0.0	0.0	0.0	0.0	0.0	0.0	0.0	0.0	0.0	0.0	0.0	0.0	0.0	0.0	0.0	0.0	0.0	0	0	0	0	0
Edinburgh	0.6298516779227464	11.293500072039778	1.3571458694366323	55.95153979999999	-3.1786567999999997	Cafe Vivo	EDH	136 Canongate The Royal Mile Old Town Edinburgh EH8 8DD	2.5649493574615367	0.6931471805599453	0.0	0	2	0	0	0	0	0.0	1.0	0.0	0.0	0.0	0.0	0.0	0.0	1.0	0.0	0.0	0.0	0.0	0.0	0.0	0.0	0.0	0.0	0.0	0.0	0.0	0.0	0.0	0.0	0.0	0.0	0.0	0	0	0	0	0
Las Vegas	6.800876678547638	5.588981678624816	1.798798588111221	36.12297	-115.18804009999998	Las Vegas Advisor	NV	3687 Procyon St Chinatown Las Vegas, NV 89103	0.0	0.0	0.0	0	2	0	1	0	0	0.0	0.0	0.0	0.0	0.0	0.0	0.0	0.0	0.0	0.0	0.0	0.0	0.0	0.0	0.0	0.0	0.0	0.0	0.0	0.0	0.0	0.0	0.0	0.0	0.0	0.0	0.0	0	0	0	0	0
Las Vegas	1.1378430963220096	7.806094703766136	6.24429218987563	36.159189000000005	-115.127554	Blue Skillet Family Restaurant	NV	1723 E Charleston Blvd Downtown Las Vegas, NV 89104	3.4965075614664802	1.6094379124341003	0.0	0	2	0	1	1	0	0.0	0.0	0.0	1.0	0.0	0.0	1.0	1.0	1.0	0.0	0.0	0.0	0.0	0.0	1.0	0.0	0.0	0.0	0.0	0.0	0.0	0.0	0.0	0.0	0.0	0.0	0.0	1	0	0	0	0
Phoenix	0.9436826521152077	6.0025772412930865	1.9913784684450524	33.4578271	-112.06745729999999	Galeria de los Muertos	AZ	905 N 5th St Phoenix, AZ 85004	1.791759469228055	0.6931471805599453	0.0	0	2	0	1	1	0	0.0	0.0	0.0	0.0	0.0	0.0	0.0	0.0	1.0	0.0	0.0	0.0	0.0	0.0	0.0	0.0	0.0	0.0	0.0	0.0	0.0	0.0	0.0	0.0	0.0	0.0	0.0	0	0	0	0	0
Las Vegas	6.337652710133704	6.440562861456484	2.5928724828625063	36.131679299999995	-115.1908457	Tlc Roof Services	NV	3111 S Valley View Blvd Ste B108 Westside Las Vegas, NV 89102	0.0	0.0	0.0	0	2	0	1	0	0	0.0	0.0	0.0	0.0	0.0	0.0	0.0	0.0	1.0	0.0	0.0	0.0	0.0	0.0	0.0	0.0	0.0	0.0	0.0	0.0	0.0	0.0	0.0	0.0	0.0	0.0	0.0	0	0	0	0	0
Phoenix	16.96059289682434	13.151641938414507	18.88836107846791	33.3211875	-111.97950220000001	Pizza Hut	AZ	4810 E Ray Rd Ste 1 Phoenix, AZ 85044	0.0	0.0	0.0	0	0	0	1	1	0	1.0	0.0	0.0	1.0	0.0	0.0	1.0	1.0	1.0	0.0	0.0	0.0	0.0	0.0	0.0	0.0	0.0	0.0	0.0	0.0	0.0	0.0	0.0	0.0	0.0	0.0	0.0	1	0	0	0	1
Phoenix	14.297423735011938	20.695538355990966	14.543485779617729	33.493483399999995	-112.22001100000001	Baskin-Robbins Ice Cream & Yogurt Stores	AZ	4021 N 75th Ave Phoenix, AZ 85033	2.70805020110221	1.0986122886681098	0.0	0	2	0	1	0	0	0.0	0.0	0.0	0.0	0.0	0.0	0.0	0.0	1.0	0.0	0.0	0.0	0.0	0.0	0.0	0.0	0.0	0.0	0.0	0.0	0.0	0.0	0.0	0.0	0.0	0.0	0.0	0	0	0	0	0
Phoenix	7.508863214037828	8.355322896394354	4.81435899396248	33.509706099999995	-112.0328415	U.S. Bank	AZ	2222 E Camelback Rd Ste 100 Phoenix, AZ 85016	2.70805020110221	0.0	0.0	0	2	0	1	0	0	0.0	0.0	0.0	0.0	0.0	0.0	0.0	0.0	0.0	0.0	0.0	0.0	0.0	0.0	0.0	0.0	0.0	0.0	0.0	0.0	0.0	0.0	0.0	0.0	0.0	0.0	0.0	0	0	0	0	0
Edinburgh	3.4882278466803984	10.13705908787037	2.7649205084691184	55.9243927586518	-3.20999552698368	VINO	EDH	32-34 Comiston Road Morningside Morningside Edinburgh EH10 5QE	3.332204510175204	0.0	0.0	0	2	0	1	1	0	0.0	0.0	0.0	0.0	0.0	0.0	0.0	0.0	1.0	0.0	0.0	0.0	0.0	0.0	0.0	0.0	1.0	0.0	0.0	0.0	0.0	0.0	0.0	0.0	0.0	0.0	0.0	0	0	0	0	0
Phoenix	15.147457841906418	19.356431524164556	13.00310720339217	33.5815112	-112.12515549999999	Samurai Sam's	AZ	3039 West Peoria - #103 Phoenix, AZ 85029	4.727387818712341	1.9459101490553132	0.0	2	2	0	1	0	0	0.0	0.0	0.0	1.0	0.0	0.0	0.0	1.0	1.0	0.0	0.0	0.0	0.0	0.0	1.0	0.0	0.0	0.0	0.0	0.0	0.0	0.0	0.0	0.0	0.0	0.0	0.0	1	0	0	0	0
Charlotte	9.478442962366568	36.174611817480816	12.075292409981447	35.219378000000006	-80.945041	Quiznos	NC	5501 Josh Birmingham Pkwy Ste 13 Charlotte, NC 28208	4.2626798770413155	0.6931471805599453	0.0	0	2	0	1	0	0	0.0	0.0	0.0	1.0	0.0	0.0	0.0	1.0	1.0	0.0	0.0	0.0	0.0	0.0	1.0	0.0	0.0	0.0	0.0	0.0	0.0	0.0	0.0	0.0	0.0	0.0	0.0	1	1	1	0	0
Edinburgh	2.195112391464941	9.77643998255465	1.3907694993901785	55.9369715	-3.2080839	Three Birds	EDH	3 Viewforth Bruntsfield Edinburgh EH10 4JD	3.6375861597263857	1.791759469228055	1.0986122886681098	0	1	0	1	1	0	0.0	0.0	0.0	1.0	0.0	0.0	1.0	1.0	1.0	1.0	0.0	0.0	0.0	0.0	0.0	0.0	0.0	0.0	0.0	0.0	0.0	0.0	0.0	0.0	0.0	0.0	0.0	1	0	0	0	0
Las Vegas	8.94958005684945	9.02516611354227	5.383443159500503	36.133412	-115.225958	Parisian Palace	NV	6150 Palmyra Ave Westside Las Vegas, NV 89146	2.4849066497880004	0.6931471805599453	0.0	0	2	0	1	0	0	0.0	0.0	0.0	0.0	0.0	0.0	0.0	0.0	0.0	0.0	0.0	0.0	0.0	0.0	0.0	0.0	0.0	0.0	0.0	0.0	0.0	0.0	0.0	0.0	0.0	0.0	0.0	0	0	0	0	0
Charlotte	18.82066057354425	20.246781689200585	15.767038553484774	35.062218	-80.77334599999999	Johnny Brusco's New York Style Pizza	NC	5349 Ballantyne Commons Pkwy Charlotte, NC 28277	3.58351893845611	1.0986122886681098	0.0	0	0	0	0	0	0	0.0	1.0	0.0	1.0	0.0	0.0	1.0	1.0	1.0	1.0	0.0	0.0	0.0	0.0	1.0	0.0	0.0	0.0	1.0	0.0	0.0	0.0	0.0	0.0	0.0	0.0	0.0	1	0	0	0	1
Las Vegas	5.4723414899768725	5.130442160941404	1.475559485441492	36.128213	-115.17299799999999	Miguel Julio Beauty	NV	3200 S Las Vegas Blvd The Strip Las Vegas, NV 89109	2.1972245773362196	0.0	0.0	0	2	0	1	1	0	0.0	0.0	0.0	0.0	0.0	0.0	0.0	0.0	1.0	0.0	0.0	0.0	0.0	0.0	0.0	0.0	0.0	0.0	0.0	0.0	0.0	0.0	0.0	0.0	0.0	0.0	0.0	0	0	0	0	0
Las Vegas	10.946071034321742	4.087524255552843	7.827945146793964	36.072454463953	-115.101318923281	Aloha Hawaiian BBQ	NV	6475 Pecos Rd Ste B Southeast Las Vegas, NV 89120	5.389071729816501	2.70805020110221	0.0	2	2	0	1	0	0	1.0	0.0	0.0	1.0	0.0	1.0	0.0	1.0	1.0	0.0	0.0	0.0	0.0	0.0	1.0	0.0	0.0	0.0	1.0	0.0	0.0	0.0	0.0	0.0	0.0	0.0	0.0	1	0	0	0	0
Charlotte	12.042199140209478	33.54827240436201	12.415095834288236	35.143982	-80.932284	Qdoba Mexican Grill	NC	8152G S Tryon St Steele Creek Charlotte, NC 28273	4.30406509320417	2.1972245773362196	0.0	0	2	0	0	0	0	0.0	1.0	0.0	1.0	1.0	1.0	0.0	1.0	1.0	0.0	0.0	0.0	0.0	0.0	1.0	0.0	0.0	0.0	0.0	0.0	0.0	0.0	0.0	0.0	0.0	0.0	0.0	1	0	0	0	0
Phoenix	8.200658779862682	8.21846422138155	5.620622099338315	33.510613899999996	-112.02118600000001	Justin Haines - NOVA Home Loans	AZ	2850 E Camelback Rd Ste 270 Phoenix, AZ 85016	0.0	0.0	0.0	0	2	0	1	0	0	0.0	0.0	0.0	0.0	0.0	0.0	0.0	0.0	0.0	0.0	0.0	0.0	0.0	0.0	0.0	0.0	0.0	0.0	0.0	0.0	0.0	0.0	0.0	0.0	0.0	0.0	0.0	0	0	0	0	0
Charlotte	19.692558040587986	20.361489866258673	16.64236394240921	35.054559399999995	-80.7710392	Sangrock Black Belt World	NC	11030 Golf Links Dr Charlotte, NC 28277	0.0	0.0	0.0	0	2	0	1	0	0	0.0	0.0	0.0	0.0	0.0	0.0	0.0	1.0	0.0	0.0	0.0	0.0	0.0	0.0	0.0	0.0	0.0	0.0	0.0	0.0	0.0	0.0	0.0	0.0	0.0	0.0	0.0	0	0	0	0	0
Pittsburgh	0.3708746119114099	20.09704098736631	41.74485459966839	40.438506200000006	-79.99967609999999	Boulevard Deli	PA	309 Smithfield St Downtown Pittsburgh, PA 15222	1.3862943611198906	0.0	0.0	2	2	0	1	0	0	0.0	0.0	0.0	1.0	0.0	0.0	0.0	1.0	1.0	0.0	0.0	0.0	0.0	0.0	1.0	0.0	0.0	0.0	0.0	0.0	0.0	0.0	0.0	0.0	0.0	0.0	0.0	1	0	0	0	0
Edinburgh	1.6703441167778992	11.474081608763834	1.6576562700857045	55.9391515	-3.1791339	Forn	EDH	1 East Preston Street Newington Edinburgh EH8 9QQ	0.0	0.0	0.0	0	2	0	1	0	0	0.0	0.0	0.0	1.0	0.0	0.0	0.0	0.0	0.0	0.0	0.0	0.0	0.0	0.0	0.0	0.0	0.0	0.0	0.0	0.0	0.0	0.0	0.0	0.0	0.0	0.0	0.0	1	0	0	0	0
Charlotte	7.7820590339691655	24.62862241104084	5.545142591145519	35.152659759022	-80.83305667990109	LensCrafters	NC	4400 Sharon Rd G-22 South Park Charlotte, NC 28211	2.3978952727983707	1.0986122886681098	0.0	0	2	0	1	2	0	0.0	0.0	0.0	0.0	0.0	0.0	0.0	0.0	1.0	0.0	0.0	0.0	0.0	0.0	0.0	0.0	0.0	0.0	0.0	0.0	0.0	0.0	0.0	0.0	0.0	0.0	0.0	0	0	0	0	0
Pittsburgh	5.619827849394304	14.73634103040828	43.3472911098528	40.402097999999995	-80.041467	Sonny & Jo's	PA	2957 Banksville Rd Banksville Pittsburgh, PA 15216	2.3978952727983707	1.3862943611198906	0.0	2	1	0	1	1	0	1.0	1.0	0.0	1.0	1.0	0.0	0.0	1.0	1.0	0.0	0.0	0.0	0.0	0.0	1.0	0.0	0.0	0.0	1.0	0.0	0.0	0.0	0.0	0.0	0.0	0.0	0.0	1	0	0	0	1
Las Vegas	11.189795868292093	16.782611757116022	13.003214384325396	36.215721	-115.24459159999999	Sally Beauty Supply	NV	3069 N Rainbow Boulevard Las Vegas, NV 89108	3.6109179126442243	0.6931471805599453	0.0	0	2	0	1	1	0	0.0	0.0	0.0	0.0	0.0	0.0	0.0	0.0	1.0	0.0	0.0	0.0	0.0	0.0	0.0	0.0	0.0	0.0	1.0	0.0	0.0	0.0	0.0	0.0	0.0	0.0	0.0	0	0	0	0	0
Charlotte	11.25455161136713	25.714068369023902	11.889329561853847	35.295964656728394	-80.7557135172876	Firestone Complete Auto Care	NC	5532 University Pointe Blvd University City Charlotte, NC 28262	2.0794415416798357	1.0986122886681098	0.0	0	2	0	1	0	0	0.0	0.0	0.0	0.0	0.0	0.0	0.0	0.0	0.0	0.0	0.0	0.0	0.0	0.0	0.0	0.0	0.0	0.0	0.0	0.0	0.0	0.0	0.0	0.0	0.0	0.0	0.0	0	0	0	0	0
Pittsburgh	7.088668988892469	25.404618619540877	36.012050951634116	40.4442936	-79.9169098	Five Points Artisan Bakeshop	PA	6520 Wilkins Ave Squirrel Hill Pittsburgh, PA 15217	3.4339872044851463	1.6094379124341003	0.0	0	2	0	1	0	0	0.0	0.0	0.0	0.0	0.0	0.0	0.0	0.0	1.0	0.0	0.0	0.0	0.0	0.0	0.0	0.0	1.0	0.0	0.0	0.0	0.0	0.0	0.0	0.0	0.0	0.0	0.0	0	0	0	0	0
Pittsburgh	2.1051448155116628	20.1872377820305	39.95158891181896	40.42862279999999	-79.9825629	Hot Rod Piercing	PA	95 S 16th St South Side Pittsburgh, PA 15203	1.9459101490553132	1.6094379124341003	0.0	0	2	0	1	1	0	0.0	0.0	0.0	0.0	0.0	0.0	0.0	0.0	1.0	0.0	0.0	0.0	0.0	0.0	0.0	0.0	1.0	0.0	0.0	0.0	0.0	0.0	0.0	0.0	0.0	0.0	0.0	0	0	0	0	0
Phoenix	20.67642838521365	20.950090314179146	17.878031401299026	33.625997	-111.99553780000001	Sonic	AZ	4007 E Greenway Rd Phoenix, AZ 85032	5.476463551931511	3.2188758248682006	0.0	2	2	0	1	0	0	0.0	1.0	1.0	1.0	0.0	0.0	1.0	1.0	1.0	0.0	0.0	0.0	0.0	0.0	1.0	0.0	0.0	0.0	1.0	0.0	0.0	0.0	0.0	0.0	0.0	0.0	0.0	1	0	1	0	0
Las Vegas	8.109024828490318	0.8021506870104568	3.048050365366948	36.0947016	-115.14787209999999	Budget Car and Truck Rental	NV	5188 Paradise Road Southeast Las Vegas, NV 89119	1.3862943611198906	1.0986122886681098	0.0	0	2	0	1	0	0	0.0	0.0	0.0	0.0	0.0	0.0	0.0	0.0	0.0	0.0	0.0	0.0	0.0	0.0	0.0	0.0	0.0	0.0	0.0	0.0	0.0	0.0	0.0	0.0	0.0	0.0	0.0	0	0	0	0	0
Las Vegas	6.587200947132078	11.722681440912302	11.69631296895334	36.1740331	-115.0628848	Jack's Place	NV	5067 E Bonanza Rd Sunrise Las Vegas, NV 89110	2.8903717578961645	1.6094379124341003	0.0	2	1	0	1	0	2	0.0	0.0	0.0	1.0	1.0	0.0	0.0	0.0	0.0	0.0	1.0	0.0	0.0	0.0	0.0	0.0	0.0	0.0	0.0	0.0	0.0	0.0	1.0	0.0	0.0	1.0	0.0	0	0	0	1	0
Las Vegas	13.818806846759026	15.261843792931888	11.641801695033456	36.1577574793366	-115.288746356964	Jos A Bank	NV	Crossroads Common Center 8885 W Charleston Blvd, Ste 110 & 120 Westside Las Vegas, NV 89117	3.044522437723423	0.6931471805599453	0.0	0	2	0	1	2	0	0.0	0.0	0.0	0.0	0.0	0.0	0.0	0.0	1.0	0.0	0.0	0.0	0.0	0.0	0.0	0.0	0.0	0.0	1.0	0.0	0.0	0.0	0.0	0.0	0.0	0.0	0.0	0	0	0	0	0
Las Vegas	5.43277303437243	3.1893745431609593	3.140401943218234	36.118139899999996	-115.135927	Valerio's Tropical Bake Shop	NV	3890 S Maryland Pkwy Eastside Las Vegas, NV 89119	5.717027701406222	3.258096538021482	0.0	0	2	0	1	0	0	0.0	0.0	0.0	0.0	0.0	0.0	0.0	1.0	1.0	0.0	0.0	0.0	0.0	0.0	1.0	0.0	0.0	0.0	1.0	0.0	0.0	0.0	0.0	0.0	0.0	0.0	0.0	1	0	0	0	0
Phoenix	20.686761046939367	22.83267841813935	18.00255144267692	33.6379629	-112.06300590000001	Tropic Zone	AZ	820 E Greenway Pkwy Phoenix, AZ 85022	3.295836866004329	1.791759469228055	0.0	0	2	0	1	0	0	0.0	0.0	0.0	0.0	0.0	0.0	0.0	0.0	0.0	0.0	0.0	0.0	0.0	0.0	0.0	0.0	0.0	0.0	0.0	0.0	0.0	0.0	0.0	0.0	0.0	0.0	0.0	0	0	0	0	0
Las Vegas	14.996438865197343	18.169773551557828	14.374183873726322	36.191493	-115.29956499999999	George J Alexander, MD, FACS	NV	Las Vegas Breast Augmentation 1725 Village Center Cir, Ste 150 Summerlin Las Vegas, NV 89134	2.302585092994046	1.0986122886681098	0.0	0	2	0	1	3	0	0.0	0.0	0.0	0.0	0.0	0.0	0.0	0.0	1.0	0.0	0.0	0.0	0.0	0.0	0.0	0.0	0.0	0.0	0.0	0.0	0.0	0.0	0.0	0.0	0.0	0.0	0.0	0	0	0	0	0
Las Vegas	15.01214035395308	22.959918826815038	19.670114180813787	36.2901027	-115.20513090000001	Department of Motor Vehicles	NV	7170 N Decatur Blvd Las Vegas, NV 89131	6.327936783729195	4.430816798843313	1.0986122886681098	0	2	0	1	0	0	0.0	0.0	0.0	0.0	0.0	0.0	0.0	0.0	0.0	0.0	0.0	0.0	0.0	0.0	0.0	0.0	0.0	0.0	0.0	0.0	0.0	0.0	0.0	0.0	0.0	0.0	0.0	0	0	0	0	0
Las Vegas	5.918274080410098	4.340146169960712	0.7150270430508888	36.12145170000001	-115.16961119999999	GG Santi-Venezia Cioccolata	NV	The Venetian 3355 Las Vegas Blvd S The Strip Las Vegas, NV 89136	2.833213344056216	1.3862943611198906	0.0	0	2	0	1	1	0	0.0	0.0	0.0	0.0	0.0	0.0	0.0	0.0	1.0	0.0	0.0	0.0	0.0	0.0	0.0	0.0	0.0	0.0	0.0	1.0	0.0	0.0	0.0	0.0	0.0	0.0	0.0	0	0	0	0	0
Las Vegas	10.102474297187564	5.965584923770646	3.85167373792658	36.0968865	-115.20704740000002	iBlowdry Hair Salon	NV	5120 S Decatur Blvd Ste 102 Las Vegas, NV 89118	4.890349128221754	2.6390573296152584	0.0	0	2	0	1	1	0	0.0	0.0	0.0	0.0	0.0	0.0	0.0	1.0	1.0	0.0	0.0	0.0	0.0	0.0	0.0	0.0	0.0	0.0	1.0	0.0	0.0	0.0	0.0	0.0	0.0	0.0	0.0	0	0	0	0	0
Pittsburgh	4.799510145013378	15.745642065433234	41.779249967948815	40.4018058	-80.021845	Rohrich Cadillac	PA	2676 West Liberty Ave Beechview Pittsburgh, PA 15216	0.0	0.0	0.0	0	2	0	1	0	0	0.0	0.0	0.0	0.0	0.0	0.0	0.0	0.0	0.0	0.0	0.0	0.0	0.0	0.0	0.0	0.0	0.0	0.0	0.0	0.0	0.0	0.0	0.0	0.0	0.0	0.0	0.0	0	0	0	0	0
Pittsburgh	7.221168919352207	13.13282442702203	43.53785318216988	40.38892	-80.049921	IO Deli	PA	300C Beverly Rd Pittsburgh, PA 15216	0.0	0.0	0.0	0	0	0	1	1	0	0.0	0.0	0.0	0.0	0.0	0.0	0.0	1.0	1.0	0.0	0.0	0.0	0.0	0.0	1.0	0.0	0.0	0.0	0.0	0.0	0.0	0.0	0.0	0.0	0.0	0.0	0.0	1	0	0	0	0
Phoenix	6.361701668518137	9.900532400174264	3.743037705867445	33.5089938	-112.07127340000002	St. Francis Restaurant	AZ	111 E Camelback Rd Phoenix, AZ 85012	7.992268643270745	5.616771097666572	0.6931471805599453	0	1	0	0	1	0	0.0	1.0	0.0	1.0	0.0	0.0	1.0	1.0	1.0	1.0	0.0	0.0	0.0	0.0	1.0	0.0	0.0	1.0	1.0	0.0	0.0	0.0	0.0	0.0	0.0	0.0	0.0	1	0	0	0	0
Las Vegas	7.7571511289992	2.94294808915612	1.3494156734624796	36.1029162	-115.1697555	Studio 54	NV	MGM Grand Hotel and Casino 3799 Las Vegas Blvd S Eastside Las Vegas, NV 89109	4.919980925828125	2.4849066497880004	0.0	3	1	0	1	2	2	0.0	0.0	0.0	1.0	1.0	0.0	0.0	0.0	1.0	0.0	0.0	1.0	0.0	0.0	0.0	1.0	0.0	1.0	0.0	1.0	0.0	1.0	0.0	0.0	0.0	0.0	0.0	0	0	0	1	0
Las Vegas	11.24991927128748	18.133235815288486	14.546204836717019	36.2387731	-115.224075	Velvet's Touch	NV	5803 W Craig Rd Ste 104 Northwest Las Vegas, NV 89130	2.1972245773362196	0.6931471805599453	0.0	0	2	0	1	0	0	0.0	0.0	0.0	0.0	0.0	0.0	0.0	0.0	1.0	0.0	0.0	0.0	0.0	0.0	0.0	0.0	0.0	0.0	1.0	0.0	0.0	0.0	0.0	0.0	0.0	0.0	0.0	0	0	0	0	0
Las Vegas	15.705785749801567	10.066764918341791	9.318338628957944	36.0573732	-115.24579240000001	Extreme Circus Bootcamp	NV	7020 West Warm Springs Rd Ste 170 Southwest Las Vegas, NV 89113	0.0	0.0	0.0	0	2	0	1	0	0	0.0	0.0	0.0	0.0	0.0	0.0	0.0	1.0	0.0	0.0	0.0	0.0	0.0	0.0	0.0	0.0	0.0	0.0	0.0	0.0	0.0	0.0	0.0	0.0	0.0	0.0	0.0	0	0	0	0	0
Pittsburgh	8.705589711696835	27.01393492576049	35.07515575378057	40.4499631	-79.89834090000001	Pittsburgh Center for Creative Reuse	PA	214 N Lexington St Point Breeze Pittsburgh, PA 15208	3.367295829986474	1.3862943611198906	0.0	0	2	0	1	0	0	0.0	0.0	0.0	0.0	0.0	0.0	0.0	0.0	1.0	0.0	0.0	0.0	0.0	0.0	0.0	0.0	1.0	0.0	0.0	0.0	0.0	0.0	0.0	0.0	0.0	0.0	0.0	0	0	0	0	0
Las Vegas	3.7035756711803725	5.242725270209539	2.920888255829921	36.1362847	-115.1514119	Club Oasis	NV	3000 Paradise Rd Eastside Las Vegas, NV 89109	1.6094379124341003	0.0	0.0	0	1	0	1	0	1	0.0	0.0	0.0	0.0	0.0	0.0	0.0	0.0	1.0	0.0	1.0	0.0	0.0	0.0	0.0	0.0	0.0	1.0	0.0	0.0	0.0	0.0	0.0	0.0	0.0	0.0	0.0	0	0	0	1	0
Phoenix	13.734215057794831	18.00382407623921	11.602875316974384	33.569402000000004	-112.12041909999999	Appliance Repair For Less	AZ	9201 N 29th Ave Phoenix, AZ 85051	0.0	0.6931471805599453	0.0	0	2	0	1	0	0	0.0	0.0	0.0	0.0	0.0	0.0	0.0	0.0	1.0	0.0	0.0	0.0	0.0	0.0	0.0	0.0	0.0	0.0	0.0	0.0	0.0	0.0	0.0	0.0	0.0	0.0	0.0	0	0	0	0	0
Phoenix	23.28380183275427	26.902474311878613	20.9657032049676	33.6555982	-112.13415149999999	The Helmet Center	AZ	18635 N 35th Ave Ste 106 Phoenix, AZ 85027	3.6888794541139363	1.791759469228055	0.0	0	2	0	1	1	0	0.0	0.0	0.0	0.0	0.0	0.0	0.0	0.0	1.0	0.0	0.0	0.0	0.0	0.0	0.0	0.0	0.0	0.0	1.0	0.0	0.0	0.0	0.0	0.0	0.0	0.0	0.0	0	0	0	0	0
Las Vegas	5.918274080410098	4.340146169960712	0.7150270430508888	36.12145170000001	-115.16961119999999	Towers Deli	NV	The Venetian Hotel/Casino 3355 Las Vegas Blvd The Strip Las Vegas, NV 89109	4.1588830833596715	2.3978952727983707	0.0	0	2	0	1	1	0	0.0	0.0	0.0	1.0	0.0	0.0	0.0	1.0	1.0	0.0	0.0	0.0	0.0	0.0	1.0	0.0	0.0	0.0	0.0	1.0	0.0	0.0	0.0	0.0	0.0	0.0	0.0	1	0	0	0	0
Pittsburgh	1.003593058767967	19.361955716009298	41.97548155028196	40.433785	-80.005866	Ref's	PA	4 E Station Sq Dr South Side Pittsburgh, PA 15203	2.8903717578961645	1.6094379124341003	0.0	3	1	0	1	0	2	0.0	0.0	0.0	1.0	1.0	0.0	0.0	0.0	1.0	0.0	1.0	1.0	0.0	0.0	0.0	0.0	0.0	0.0	0.0	1.0	0.0	0.0	0.0	0.0	0.0	1.0	0.0	0	0	0	1	0
Edinburgh	4.1328637026885975	8.40144521244347	4.188750668245056	55.98220179999999	-3.2296881	GO Outdoors	EDH	Unit D 65 West Harbour Road Edinburgh EH5 1PW	2.0794415416798357	0.6931471805599453	0.0	0	2	0	1	1	0	0.0	0.0	0.0	0.0	0.0	0.0	0.0	0.0	1.0	0.0	0.0	0.0	0.0	0.0	0.0	0.0	0.0	0.0	1.0	0.0	0.0	0.0	0.0	0.0	0.0	0.0	0.0	0	0	0	0	0
Edinburgh	0.8027160382021576	10.75165924188223	0.7477903526165744	55.94604399999999	-3.1886076	Edinburgh University Freshers' Week	EDH	The Potterrow 5/2 Bristo Sq Newington Edinburgh EH8 9AL	0.0	0.0	0.0	0	2	0	1	0	0	0.0	0.0	0.0	0.0	0.0	0.0	0.0	0.0	0.0	0.0	0.0	0.0	0.0	0.0	0.0	0.0	0.0	0.0	0.0	0.0	0.0	0.0	0.0	0.0	0.0	0.0	0.0	0	0	0	0	0
Phoenix	23.19740361823528	26.809289039388382	20.876577062637914	33.6549301	-112.13349679999999	McDonald's	AZ	3434 W Union Hills Drive Phoenix, AZ 85027	2.1972245773362196	0.0	0.0	0	2	0	0	0	0	1.0	0.0	1.0	1.0	0.0	0.0	0.0	1.0	1.0	0.0	0.0	0.0	0.0	0.0	1.0	0.0	0.0	0.0	0.0	0.0	0.0	0.0	0.0	0.0	0.0	0.0	0.0	1	0	1	0	0
Las Vegas	8.350244415924163	7.652078912972203	4.056709326066293	36.1262291442002	-115.21350730421699	Sushi Takashi	NV	5300 W Spring Mountain Rd Chinatown Las Vegas, NV 89146	4.990432586778736	2.8903717578961645	1.0986122886681098	0	0	0	0	1	0	0.0	0.0	0.0	1.0	1.0	0.0	1.0	1.0	1.0	1.0	0.0	0.0	0.0	0.0	1.0	0.0	0.0	0.0	1.0	0.0	0.0	0.0	0.0	0.0	0.0	0.0	0.0	1	0	0	0	0
Edinburgh	2.0567340750393326	10.660195480585623	1.5349093228131887	55.9350951	-3.1943344	D F Mcleod	EDH	138 Marchmont Road Marchmont Edinburgh EH9 1AQ	0.0	0.0	0.0	0	2	0	1	1	0	0.0	0.0	0.0	0.0	0.0	0.0	0.0	0.0	0.0	0.0	0.0	0.0	0.0	0.0	0.0	0.0	0.0	0.0	0.0	0.0	0.0	0.0	0.0	0.0	0.0	0.0	0.0	0	0	0	0	0
Pittsburgh	2.3467726464729157	22.62780156868363	41.08229377177051	40.4549474	-79.9787412	Elite Coach Limousine	PA	2549 Penn Ave Strip District Pittsburgh, PA 15222	0.0	0.0	0.0	0	2	0	1	0	0	0.0	0.0	0.0	0.0	0.0	0.0	0.0	0.0	0.0	0.0	0.0	0.0	0.0	0.0	0.0	0.0	0.0	0.0	0.0	0.0	0.0	0.0	0.0	0.0	0.0	0.0	0.0	0	0	0	0	0
Edinburgh	0.18287810801631882	10.827685754495358	1.0688352610283827	55.9541044	-3.1857656000000003	Heart Of Scotland Tours	EDH	37 Logie Green Road Edinburgh EH1 3BQ	0.0	0.0	0.0	0	2	0	1	0	0	0.0	0.0	0.0	0.0	0.0	0.0	0.0	0.0	0.0	0.0	0.0	0.0	0.0	0.0	0.0	0.0	0.0	0.0	0.0	0.0	0.0	0.0	0.0	0.0	0.0	0.0	0.0	0	0	0	0	0
Phoenix	21.619041150726343	22.614277428586668	18.828769441379897	33.6410451	-112.0192408	Al Fuego Mexican Restaurant	AZ	2948 E Bell Rd Ste 102 Phoenix, AZ 85032	3.4011973816621555	1.791759469228055	0.0	2	2	0	0	0	0	0.0	0.0	0.0	0.0	0.0	0.0	0.0	1.0	1.0	0.0	0.0	0.0	0.0	0.0	1.0	0.0	0.0	0.0	0.0	0.0	0.0	0.0	0.0	0.0	0.0	0.0	0.0	1	0	0	0	0
Las Vegas	16.722828069161533	15.413472494997691	12.531551194331376	36.1146528	-115.3097889	Snips & Clips 4 Kids	NV	4115 S Grand Canyon Dr Spring Valley Las Vegas, NV 89147	4.406719247264253	2.70805020110221	0.0	0	2	0	1	1	0	0.0	0.0	0.0	0.0	0.0	0.0	0.0	1.0	1.0	0.0	0.0	0.0	0.0	0.0	0.0	0.0	0.0	0.0	1.0	0.0	0.0	0.0	0.0	0.0	0.0	0.0	0.0	0	0	0	0	0
Phoenix	3.7804096340312006	10.04260757919178	4.023724766232247	33.471111900000004	-112.107926	Shuttercrafters	AZ	2113 N 23rd Ave Phoenix, AZ 85009	0.0	0.0	0.0	0	2	0	1	0	0	0.0	0.0	0.0	0.0	0.0	0.0	0.0	0.0	1.0	0.0	0.0	0.0	0.0	0.0	0.0	0.0	0.0	0.0	0.0	0.0	0.0	0.0	0.0	0.0	0.0	0.0	0.0	0	0	0	0	0
Las Vegas	4.306486665097685	4.871552341409717	2.2926032210573846	36.1320061	-115.156035	Piero's Italian Cuisine	NV	355 Convention Center Dr Eastside Las Vegas, NV 89109	5.986452005284438	3.332204510175204	0.6931471805599453	0	1	1	1	2	0	0.0	0.0	0.0	1.0	1.0	0.0	1.0	0.0	1.0	1.0	0.0	0.0	0.0	0.0	1.0	0.0	0.0	1.0	0.0	0.0	0.0	0.0	0.0	0.0	0.0	0.0	0.0	1	0	0	0	0
Phoenix	25.96309675767771	29.041016110881138	23.49539879420687	33.6833097779457	-112.115031001968	Denny's	AZ	2525 W Deer Valley Rd Phoenix, AZ 85027	4.060443010546419	2.0794415416798357	0.0	3	2	0	0	0	0	0.0	0.0	0.0	1.0	0.0	0.0	1.0	1.0	1.0	0.0	0.0	0.0	0.0	0.0	1.0	0.0	0.0	0.0	1.0	0.0	0.0	0.0	0.0	0.0	0.0	0.0	0.0	1	0	0	0	0
Las Vegas	7.883558064211955	2.985637683136086	1.4418477746368346	36.1020655741141	-115.17086436788401	Mgm Grand Skyline Terrace Suite	NV	Mgm Grand Eastside Las Vegas, NV 89109	3.367295829986474	1.0986122886681098	0.0	0	2	0	0	3	0	0.0	0.0	0.0	0.0	0.0	0.0	0.0	0.0	1.0	0.0	0.0	0.0	0.0	0.0	0.0	0.0	0.0	0.0	0.0	0.0	0.0	0.0	0.0	0.0	0.0	0.0	0.0	0	0	0	0	0
Pittsburgh	6.14403021003525	25.470101905325272	37.721231826939025	40.4563938195113	-79.93053868510921	Daphne Cafe	PA	5811 Ellsworth Ave Shadyside Pittsburgh, PA 15232	5.0689042022202315	2.302585092994046	0.6931471805599453	2	2	0	1	1	0	0.0	1.0	0.0	1.0	0.0	1.0	1.0	1.0	1.0	1.0	0.0	0.0	0.0	0.0	1.0	0.0	1.0	0.0	0.0	0.0	0.0	0.0	0.0	0.0	0.0	0.0	0.0	1	0	0	0	0
Las Vegas	4.833727237334215	3.8743745351339807	2.416147749874276	36.124423	-115.146372	32 Degrees	NV	MGM Grand Hotel & Casino 3799 Las Vegas Blvd S Eastside Las Vegas, NV 89109	4.584967478670572	2.4849066497880004	0.0	0	1	0	1	1	2	0.0	0.0	0.0	1.0	0.0	0.0	0.0	0.0	1.0	0.0	1.0	0.0	0.0	0.0	0.0	0.0	0.0	0.0	0.0	0.0	0.0	0.0	0.0	0.0	0.0	0.0	0.0	0	0	0	1	0
Las Vegas	14.04449803767551	18.92834762515418	15.085805416780689	36.219721899999996	-115.2776138	Midas	NV	3232 North Durango Northwest Las Vegas, NV 89129	2.6390573296152584	1.0986122886681098	0.0	0	2	0	1	0	0	0.0	0.0	0.0	0.0	0.0	0.0	0.0	0.0	0.0	0.0	0.0	0.0	0.0	0.0	0.0	0.0	0.0	0.0	0.0	0.0	0.0	0.0	0.0	0.0	0.0	0.0	0.0	0	0	0	0	0
Las Vegas	9.102405763612964	6.7959633614184325	3.676896484136119	36.11274	-115.21133999999999	Feature Sneaker Boutique	NV	3735 Spring Mountain Rd Ste 205 Las Vegas, NV 89103	5.472270673671475	1.9459101490553132	0.0	0	2	0	1	1	0	0.0	0.0	0.0	0.0	0.0	0.0	0.0	0.0	1.0	0.0	0.0	0.0	0.0	0.0	0.0	0.0	1.0	0.0	0.0	0.0	0.0	0.0	0.0	0.0	0.0	0.0	0.0	0	0	0	0	0
Phoenix	16.99087245008419	23.389908448320625	17.622879088708608	33.478015899999995	-112.25455900000001	Bien Nails	AZ	2755 N 91st Ave Phoenix, AZ 85037	1.6094379124341003	0.6931471805599453	0.0	0	2	0	1	1	0	0.0	0.0	0.0	0.0	0.0	0.0	0.0	0.0	1.0	0.0	0.0	0.0	0.0	0.0	0.0	0.0	0.0	0.0	0.0	0.0	0.0	0.0	0.0	0.0	0.0	0.0	0.0	0	0	0	0	0
Phoenix	34.58845612072506	36.656527075355186	31.9354474291104	33.7635354	-112.0714835	Arizona Pools & Landscape	AZ	Phoenix, AZ 85085	0.0	0.0	0.0	0	2	0	1	0	0	0.0	0.0	0.0	0.0	0.0	0.0	0.0	0.0	1.0	0.0	0.0	0.0	0.0	0.0	0.0	0.0	0.0	0.0	0.0	0.0	0.0	0.0	0.0	0.0	0.0	0.0	0.0	0	0	0	0	0
Las Vegas	12.51714006523384	17.83715138541701	14.022421936423287	36.2190682	-115.25911909999999	Sushi In Summerlin	NV	7450 W Cheyenne Ave Ste 118 Northwest Las Vegas, NV 89129	3.8501476017100584	2.4849066497880004	0.6931471805599453	2	0	0	1	1	0	0.0	0.0	0.0	1.0	1.0	0.0	1.0	1.0	1.0	1.0	0.0	0.0	0.0	0.0	1.0	0.0	0.0	0.0	1.0	0.0	0.0	0.0	0.0	0.0	0.0	0.0	0.0	1	0	0	0	0
Las Vegas	8.767204227127236	9.066011819535838	5.38284409949428	36.135442700000006	-115.2248611	Canyon Lake Neck And Back Clinic	NV	2980 S Jones Blvd Suite F Westside Las Vegas, NV 89146	4.174387269895637	2.0794415416798357	0.0	0	2	0	1	0	0	0.0	0.0	0.0	0.0	0.0	0.0	0.0	0.0	0.0	0.0	0.0	0.0	0.0	0.0	0.0	0.0	0.0	0.0	0.0	0.0	0.0	0.0	0.0	0.0	0.0	0.0	0.0	0	0	0	0	0
Las Vegas	2.4811102239983924	7.033995718283347	4.3079922090688365	36.152021000000005	-115.15596000000001	Hector's Automotive	NV	105 W Wyoming Ave Downtown Las Vegas, NV 89102	0.0	0.6931471805599453	0.0	0	2	0	1	0	0	0.0	0.0	0.0	0.0	0.0	0.0	0.0	0.0	0.0	0.0	0.0	0.0	0.0	0.0	0.0	0.0	0.0	0.0	0.0	0.0	0.0	0.0	0.0	0.0	0.0	0.0	0.0	0	0	0	0	0
Pittsburgh	3.8902518575087	22.475321289443986	38.33286391983715	40.436932	-79.954993	Campus Deli	PA	400 Semple St Oakland Pittsburgh, PA 15213	2.4849066497880004	1.3862943611198906	0.0	0	2	0	1	0	0	1.0	0.0	0.0	1.0	1.0	0.0	0.0	1.0	1.0	0.0	0.0	0.0	0.0	0.0	1.0	0.0	1.0	0.0	0.0	0.0	0.0	0.0	0.0	0.0	0.0	0.0	0.0	1	0	0	0	0
Pittsburgh	4.30219176378079	23.400190540793954	38.39898710425141	40.4447699	-79.9498392	St Nicholas Greek Orthodox Cathedral	PA	419 S Dithridge St Oakland Pittsburgh, PA 15213	3.5263605246161616	1.6094379124341003	0.0	0	2	0	1	0	0	0.0	0.0	0.0	0.0	0.0	0.0	0.0	0.0	0.0	0.0	0.0	0.0	0.0	0.0	0.0	0.0	0.0	0.0	0.0	0.0	0.0	0.0	0.0	0.0	0.0	0.0	0.0	0	0	0	0	0
Charlotte	14.898801303578797	27.99264455625664	13.182792409561367	35.0901902	-80.8689902	Cicis Pizza	NC	10707 Park Rd Charlotte, NC 28210	2.70805020110221	0.0	0.0	3	2	0	1	0	0	0.0	0.0	0.0	1.0	1.0	0.0	0.0	1.0	1.0	0.0	0.0	0.0	0.0	0.0	1.0	0.0	0.0	0.0	0.0	0.0	0.0	0.0	0.0	0.0	0.0	0.0	0.0	1	0	0	0	1
Las Vegas	5.230649293772003	4.6648117928155965	1.375243654261973	36.1268238	-115.1657996	Rolex Wynn & Co	NV	3131 Las Vegas Blvd S The Strip Las Vegas, NV 89109	3.7376696182833684	1.0986122886681098	0.0	0	2	0	1	3	0	0.0	0.0	0.0	0.0	0.0	0.0	0.0	0.0	1.0	0.0	0.0	0.0	0.0	0.0	0.0	0.0	0.0	0.0	0.0	1.0	0.0	0.0	0.0	0.0	0.0	0.0	0.0	0	0	0	0	0
Las Vegas	9.35719184202622	0.7927584494502278	4.559715231968289	36.082822133487205	-115.139198370418	Burke in the Box	NV	McCarran International Airport Southeast Las Vegas, NV 89119	5.616771097666572	3.6635616461296463	0.0	0	1	0	1	1	0	0.0	0.0	0.0	0.0	1.0	0.0	1.0	1.0	1.0	0.0	0.0	0.0	0.0	0.0	1.0	0.0	0.0	0.0	0.0	1.0	0.0	0.0	0.0	0.0	0.0	0.0	0.0	1	0	0	0	0
Charlotte	4.361682552852489	23.11473038981255	2.4353466663310743	35.21447	-80.794103	Oak Park At Briarcreek	NC	1425 Eastcrest Dr Charlotte, NC 28205	0.0	1.0986122886681098	0.0	0	2	0	1	0	0	0.0	0.0	0.0	0.0	0.0	0.0	0.0	0.0	1.0	0.0	0.0	0.0	0.0	0.0	0.0	0.0	0.0	0.0	0.0	0.0	0.0	0.0	0.0	0.0	0.0	0.0	0.0	0	0	0	0	0
Charlotte	19.86623152404189	20.406968293316258	16.81830147174915	35.0529811	-80.7707695	Ilios Noche	NC	11508 Providence Rd Charlotte, NC 28277	5.697093486505405	3.367295829986474	1.0986122886681098	0	1	0	0	1	0	0.0	1.0	0.0	1.0	1.0	1.0	1.0	1.0	1.0	1.0	0.0	0.0	0.0	0.0	1.0	0.0	0.0	0.0	1.0	0.0	0.0	0.0	0.0	0.0	0.0	0.0	0.0	1	0	0	0	0
Las Vegas	16.95934047642237	10.595824289956477	10.442574925145177	36.041476196662	-115.24287914369499	Smith's Gas Station	NV	8050 S Rainbow Southwest Las Vegas, NV 89139	4.672828834461906	1.6094379124341003	0.0	0	2	0	1	0	0	0.0	0.0	0.0	0.0	0.0	0.0	0.0	0.0	0.0	0.0	0.0	0.0	0.0	0.0	0.0	0.0	0.0	0.0	0.0	0.0	0.0	0.0	0.0	0.0	0.0	0.0	0.0	0	0	0	0	0
Phoenix	38.510822300884875	40.44481519968911	35.843905076040386	33.798823898677504	-112.065352879542	Krazy 4 Koffee	AZ	711 E Carefree Hwy Ste 109 Phoenix, AZ 85085	3.4011973816621555	2.1972245773362196	0.0	0	2	0	0	0	0	0.0	1.0	0.0	0.0	0.0	0.0	0.0	0.0	1.0	0.0	0.0	0.0	0.0	0.0	0.0	0.0	0.0	0.0	1.0	0.0	0.0	0.0	0.0	0.0	0.0	0.0	0.0	0	0	0	0	0
Las Vegas	16.268383837126606	18.65281278240799	14.949419991495358	36.180725	-115.315647	Summerlin Pediatric Dentistry	NV	653 N Town Center Dr Ste 104 Summerlin Las Vegas, NV 89144	2.995732273553991	1.0986122886681098	0.0	0	2	0	1	0	0	0.0	0.0	0.0	0.0	0.0	0.0	0.0	0.0	0.0	0.0	0.0	0.0	0.0	0.0	0.0	0.0	0.0	0.0	0.0	0.0	0.0	0.0	0.0	0.0	0.0	0.0	0.0	0	0	0	0	0
Las Vegas	8.614037566243557	0.30447333769647406	4.080500584018647	36.089494	-115.138026	Johnny McGuire's Deli	NV	Town Square 6599 Las Vegas Blvd S, Ste 209 Southeast Las Vegas, NV 89119	5.342334251964811	3.6109179126442243	0.0	0	2	0	0	0	0	1.0	1.0	0.0	0.0	1.0	1.0	0.0	1.0	1.0	0.0	0.0	0.0	0.0	0.0	1.0	0.0	1.0	1.0	1.0	1.0	0.0	0.0	0.0	0.0	0.0	0.0	0.0	1	1	0	0	0
Edinburgh	1.970745503443639	10.614522037874643	1.4403192658703554	55.935921400000005	-3.1946868	Cobbs Marchmont	EDH	120/3 Marchmont Road Marchmont Edinburgh EH9 1BG	1.6094379124341003	1.0986122886681098	0.0	0	2	0	1	0	0	0.0	0.0	0.0	0.0	0.0	0.0	0.0	0.0	1.0	0.0	0.0	0.0	0.0	0.0	0.0	0.0	0.0	0.0	0.0	0.0	0.0	0.0	0.0	0.0	0.0	0.0	0.0	0	0	0	0	0
Edinburgh	1.2000079195601616	9.604506089292272	1.162941777733454	55.9585642	-3.2049816000000004	Karen's Unicorn	EDH	112 St Stephen St Stockbridge Edinburgh EH3 5AD	0.0	1.0986122886681098	0.0	0	1	0	1	1	0	0.0	0.0	0.0	0.0	0.0	0.0	1.0	0.0	1.0	0.0	0.0	0.0	0.0	0.0	1.0	0.0	0.0	0.0	0.0	0.0	0.0	0.0	0.0	0.0	0.0	0.0	0.0	1	0	0	0	0
Las Vegas	3.319823966176983	5.988637711709742	3.289183775766474	36.1423378	-115.1563054	Foxtail Pool Club	NV	SLS Las Vegas 2535 Las Vegas Blvd S The Strip Las Vegas, NV 89109	5.117993812416755	2.302585092994046	0.0	3	1	0	1	2	2	0.0	1.0	0.0	1.0	1.0	0.0	0.0	0.0	1.0	0.0	0.0	1.0	0.0	0.0	0.0	0.0	0.0	0.0	0.0	1.0	0.0	1.0	0.0	0.0	0.0	0.0	0.0	0	0	0	1	0
Pittsburgh	6.658942654846331	24.375051140987843	35.845666787377134	40.4349312	-79.9224332	Charles J. Greve & Company	PA	5801 Beacon St Squirrel Hill Pittsburgh, PA 15222	0.0	0.0	0.0	0	2	0	1	0	0	0.0	0.0	0.0	0.0	0.0	0.0	0.0	0.0	0.0	0.0	0.0	0.0	0.0	0.0	0.0	0.0	0.0	0.0	0.0	0.0	0.0	0.0	0.0	0.0	0.0	0.0	0.0	0	0	0	0	0
Phoenix	22.5350072245032	25.06217183746981	19.92584401740711	33.6547974	-112.0812005	1st Pet Veterinary Centers - North Valley	AZ	520 W Union Hills Dr Ste 105 Phoenix, AZ 85027	3.295836866004329	1.3862943611198906	0.0	0	2	0	1	0	0	0.0	0.0	0.0	0.0	0.0	0.0	0.0	0.0	0.0	0.0	0.0	0.0	0.0	0.0	0.0	0.0	0.0	0.0	0.0	0.0	0.0	0.0	0.0	0.0	0.0	0.0	0.0	0	0	0	0	0
Las Vegas	13.831979931908162	12.330776290896694	9.390762326983635	36.114449	-115.274902	Chic Favors & Invitations	NV	8425 W Flamingo Rd Ste 3 Spring Valley Las Vegas, NV 89146	0.0	0.6931471805599453	0.0	0	2	0	1	1	0	0.0	0.0	0.0	0.0	0.0	0.0	0.0	0.0	1.0	0.0	0.0	0.0	0.0	0.0	0.0	0.0	0.0	0.0	0.0	0.0	0.0	0.0	0.0	0.0	0.0	0.0	0.0	0	0	0	0	0
Pittsburgh	8.432177499666931	12.599635693653592	41.465799980679535	40.3698429	-80.0321349	Mr Magic Car Wash	PA	427 Mount Lebanon Blvd Pittsburgh, PA 15234	4.912654885736052	1.0986122886681098	0.0	0	2	0	1	0	0	0.0	0.0	0.0	0.0	0.0	0.0	0.0	0.0	0.0	0.0	0.0	0.0	0.0	0.0	0.0	0.0	0.0	0.0	0.0	0.0	0.0	0.0	0.0	0.0	0.0	0.0	0.0	0	0	0	0	0
Pittsburgh	0.19403607232963788	20.410260008110022	41.77693255121749	40.441217	-79.998244	Jos A Bank	PA	527 Smithfield St Downtown Pittsburgh, PA 15222	1.791759469228055	0.0	0.0	0	2	0	1	2	0	0.0	0.0	0.0	0.0	0.0	0.0	0.0	0.0	1.0	0.0	0.0	0.0	0.0	0.0	0.0	0.0	0.0	0.0	0.0	0.0	0.0	0.0	0.0	0.0	0.0	0.0	0.0	0	0	0	0	0
Las Vegas	6.338983169902223	6.436213493814394	2.588551935841431	36.1316401	-115.1908263	Max Plumbing	NV	3111 S Valley View Blvd Ste E105 Westside Las Vegas, NV 89102	0.0	0.0	0.0	0	2	0	1	0	0	0.0	0.0	0.0	0.0	0.0	0.0	0.0	0.0	1.0	0.0	0.0	0.0	0.0	0.0	0.0	0.0	0.0	0.0	0.0	0.0	0.0	0.0	0.0	0.0	0.0	0.0	0.0	0	0	0	0	0
Phoenix	17.62583985384598	13.844770336063323	19.571431360196602	33.315129	-111.97763700000002	San Melia Apartment Homes	AZ	14435 S 48th St Phoenix, AZ 85044	2.5649493574615367	0.6931471805599453	0.0	0	2	0	1	0	0	0.0	0.0	0.0	0.0	0.0	0.0	0.0	0.0	1.0	0.0	0.0	0.0	0.0	0.0	0.0	0.0	0.0	0.0	0.0	0.0	0.0	0.0	0.0	0.0	0.0	0.0	0.0	0	0	0	0	0
Edinburgh	1.1154080219298492	11.066649953573169	1.1179846263804114	55.94348910000001	-3.1842563	Illegal Jack's	EDH	44-45 Saint Patrick Square Newington Edinburgh EH8 9ET	2.0794415416798357	1.3862943611198906	0.0	0	2	0	1	0	0	0.0	0.0	0.0	1.0	0.0	0.0	0.0	1.0	1.0	1.0	0.0	0.0	0.0	0.0	1.0	0.0	0.0	0.0	0.0	0.0	0.0	0.0	0.0	0.0	0.0	0.0	0.0	1	0	0	0	0
Charlotte	0.34344509366011977	27.61127551603208	3.767950751779622	35.2254052755737	-80.8423025219513	StrikeCity	NC	210 E Trade St Ste D164 Uptown Charlotte, NC 28202	6.453624998892692	3.1780538303479458	0.6931471805599453	1	1	0	1	1	0	0.0	1.0	0.0	1.0	1.0	0.0	0.0	1.0	1.0	0.0	1.0	0.0	0.0	0.0	0.0	0.0	0.0	1.0	0.0	1.0	0.0	1.0	0.0	0.0	0.0	0.0	0.0	0	0	0	1	0
Phoenix	7.246260124217652	8.443844184281211	4.5113483085401915	33.5092616	-112.03762140000002	Chili's Grill & Bar Catering	AZ	2057 E Camelback Rd Phoenix, AZ 85016	4.727387818712341	2.6390573296152584	0.0	0	1	0	1	1	0	0.0	1.0	0.0	1.0	1.0	0.0	1.0	1.0	1.0	0.0	0.0	0.0	0.0	0.0	1.0	0.0	0.0	0.0	1.0	0.0	0.0	0.0	0.0	0.0	0.0	0.0	0.0	1	0	0	0	0
Phoenix	24.91753248462834	28.06855091212661	22.46495192868993	33.67366	-112.11594299999999	Motor Vehicle Division	AZ	20626 N 26th Ave Phoenix, AZ 85027	4.343805421853684	1.791759469228055	0.0	0	2	0	1	0	0	0.0	0.0	0.0	0.0	0.0	0.0	0.0	0.0	0.0	0.0	0.0	0.0	0.0	0.0	0.0	0.0	0.0	0.0	0.0	0.0	0.0	0.0	0.0	0.0	0.0	0.0	0.0	0	0	0	0	0
Charlotte	7.570878390421282	34.6350847603027	10.424617695556922	35.227947	-80.923897	C Gregory Martin DDS PA	NC	2842 Boyer St Charlotte, NC 28208	0.0	0.0	0.0	0	2	0	1	0	0	0.0	0.0	0.0	0.0	0.0	0.0	0.0	0.0	0.0	0.0	0.0	0.0	0.0	0.0	0.0	0.0	0.0	0.0	0.0	0.0	0.0	0.0	0.0	0.0	0.0	0.0	0.0	0	0	0	0	0
Las Vegas	13.556270749608858	15.623859442798581	11.914581445547416	36.1672799	-115.2862703	Rouge Skin Hair & Makeup	NV	410 S Rampart Blvd Ste 390 Westside Las Vegas, NV 89145	0.0	0.6931471805599453	0.0	0	2	0	1	1	0	0.0	0.0	0.0	0.0	0.0	0.0	0.0	1.0	1.0	0.0	0.0	0.0	0.0	0.0	0.0	0.0	1.0	1.0	1.0	1.0	0.0	0.0	0.0	0.0	0.0	0.0	0.0	0	0	0	0	0
Phoenix	3.7460534210887038	7.481411878611761	0.9875365657333008	33.4845628	-112.0651986	Darwin N. Davis, DDS	AZ	3132 N 7th St Phoenix, AZ 85014	0.0	0.0	0.0	0	2	0	1	0	0	0.0	0.0	0.0	0.0	0.0	0.0	0.0	0.0	0.0	0.0	0.0	0.0	0.0	0.0	0.0	0.0	0.0	0.0	0.0	0.0	0.0	0.0	0.0	0.0	0.0	0.0	0.0	0	0	0	0	0
Las Vegas	7.753106778591339	11.727536739705892	7.902951394898131	36.17312154795329	-115.221454085156	Maximum Audio Video	NV	Westside Las Vegas, NV 89149	1.6094379124341003	0.0	0.0	0	2	0	1	1	0	0.0	0.0	0.0	0.0	0.0	0.0	0.0	0.0	0.0	0.0	0.0	0.0	0.0	0.0	0.0	0.0	0.0	0.0	0.0	0.0	0.0	0.0	0.0	0.0	0.0	0.0	0.0	0	0	0	0	0
Las Vegas	16.986289984380416	23.83727877906297	20.170097755683067	36.2812248	-115.26151840000001	Edible Arrangements	NV	6454 Sky Pointe Centennial Las Vegas, NV 89131	1.3862943611198906	1.3862943611198906	0.0	0	2	0	1	1	0	1.0	0.0	0.0	0.0	0.0	0.0	0.0	0.0	1.0	0.0	0.0	0.0	0.0	0.0	0.0	0.0	0.0	0.0	0.0	0.0	0.0	0.0	0.0	0.0	0.0	0.0	0.0	0	0	0	0	0
Las Vegas	21.744377446441554	20.415483972817995	17.666577890059603	36.110042799999995	-115.3667218	The Cat Lady	NV	Las Vegas, NV 89135	0.0	0.0	0.0	0	2	0	1	0	0	0.0	0.0	0.0	0.0	0.0	0.0	0.0	0.0	0.0	0.0	0.0	0.0	0.0	0.0	0.0	0.0	0.0	0.0	0.0	0.0	0.0	0.0	0.0	0.0	0.0	0.0	0.0	0	0	0	0	0
Phoenix	16.99851298028603	17.561294727829914	14.198737416067205	33.5956804	-112.0117994	Sears Outlet	AZ	12025 N 32nd St Phoenix, AZ 85028	3.044522437723423	1.791759469228055	0.0	0	2	0	1	1	0	0.0	0.0	0.0	0.0	0.0	0.0	0.0	0.0	1.0	0.0	0.0	0.0	0.0	0.0	0.0	0.0	0.0	0.0	0.0	0.0	0.0	0.0	0.0	0.0	0.0	0.0	0.0	0	0	0	0	0
Charlotte	17.509998233574866	10.415283985800215	14.66688641874152	35.183069	-80.65481199999999	go-go Fresco	NC	Charlotte, NC 28205	2.0794415416798357	1.0986122886681098	0.0	0	2	0	1	0	0	0.0	0.0	0.0	0.0	0.0	0.0	0.0	0.0	1.0	0.0	0.0	0.0	0.0	0.0	0.0	0.0	1.0	0.0	1.0	0.0	0.0	0.0	0.0	0.0	0.0	0.0	0.0	0	0	0	0	0
Phoenix	21.502442705164835	22.52934219691868	18.713367149352276	33.640224200000006	-112.0205273	Vapor Shop AZ	AZ	2841 E.Bell RD Suite 101 Phoenix, AZ 85032	0.0	0.0	0.0	0	2	0	1	0	0	0.0	0.0	0.0	0.0	0.0	0.0	0.0	0.0	0.0	0.0	0.0	0.0	0.0	0.0	0.0	0.0	0.0	0.0	0.0	0.0	0.0	0.0	0.0	0.0	0.0	0.0	0.0	0	0	0	0	0
Las Vegas	16.195146478350363	9.286282453407829	9.618874420282129	36.0402159	-115.22448529999998	Sunkissed Tanning	NV	4965 W Tropicana Ave Ste 108 Southwest Las Vegas, NV 89103	5.272999558563747	2.0794415416798357	0.0	0	2	0	1	1	0	0.0	0.0	0.0	0.0	0.0	0.0	0.0	0.0	1.0	0.0	0.0	0.0	0.0	0.0	0.0	0.0	0.0	0.0	1.0	0.0	0.0	0.0	0.0	0.0	0.0	0.0	0.0	0	0	0	0	0
Edinburgh	0.5757784281639158	10.133030282884754	0.41960204473060686	55.95204739999999	-3.1972308999999997	Hogmanay Street Party	EDH	Princes Street New Town Edinburgh	2.1972245773362196	0.6931471805599453	0.0	0	2	0	1	0	0	0.0	0.0	0.0	0.0	0.0	0.0	0.0	0.0	0.0	0.0	0.0	0.0	0.0	0.0	0.0	0.0	0.0	0.0	0.0	0.0	0.0	0.0	0.0	0.0	0.0	0.0	0.0	0	0	0	0	0
Las Vegas	11.039780682426034	7.850295135710057	5.344381261397817	36.101143900000004	-115.2274256	Blockbuster Video	NV	6160 W Tropicana Ave Las Vegas, NV 89103	3.58351893845611	1.0986122886681098	0.0	0	2	0	1	0	0	0.0	0.0	0.0	0.0	0.0	0.0	0.0	0.0	0.0	0.0	0.0	0.0	0.0	0.0	0.0	0.0	0.0	0.0	0.0	0.0	0.0	0.0	0.0	0.0	0.0	0.0	0.0	0	0	0	0	0
Las Vegas	9.076124370887001	3.0502983655038385	2.606193601079757	36.0918639	-115.17516140000001	Moorea Beach Club	NV	Mandalay Bay Resort & Casino 3950 S Las Vegas Boulevard The Strip Las Vegas, NV 89119	5.5053315359323625	3.091042453358316	0.0	0	1	0	1	2	2	0.0	1.0	0.0	1.0	0.0	0.0	0.0	0.0	1.0	0.0	0.0	0.0	0.0	0.0	0.0	0.0	0.0	0.0	0.0	0.0	0.0	1.0	0.0	0.0	0.0	0.0	0.0	0	0	0	0	0
Charlotte	1.7834352992585103	26.541029124532894	2.3235238923547	35.206523499999996	-80.8388347	Charlotte OB & GYN Associates	NC	1025 Morehead Medical Drive Suite 400 Dilworth Charlotte, NC 28204	1.3862943611198906	0.6931471805599453	0.0	0	2	0	1	0	0	0.0	0.0	0.0	0.0	0.0	0.0	0.0	0.0	0.0	0.0	0.0	0.0	0.0	0.0	0.0	0.0	0.0	0.0	0.0	0.0	0.0	0.0	0.0	0.0	0.0	0.0	0.0	0	0	0	0	0
Las Vegas	16.8939986376729	14.129231742271173	11.797734320128113	36.091165999999994	-115.29826899999999	Trimcare	NV	5375 S Fort Apache Rd Ste 102 Spring Valley Las Vegas, NV 89148	3.4965075614664802	1.6094379124341003	0.0	0	2	0	1	2	0	0.0	0.0	0.0	0.0	0.0	0.0	0.0	0.0	1.0	0.0	0.0	0.0	0.0	0.0	0.0	0.0	0.0	0.0	1.0	0.0	0.0	0.0	0.0	0.0	0.0	0.0	0.0	0	0	0	0	0
Phoenix	8.713003714443616	5.098988193976247	7.258473569916687	33.4799838	-111.9870563	The Grill Next Door	AZ	4345 E Thomas Rd Phoenix, AZ 85073	1.791759469228055	1.6094379124341003	0.0	0	0	0	1	1	0	0.0	1.0	0.0	1.0	0.0	0.0	1.0	0.0	1.0	0.0	0.0	0.0	0.0	0.0	1.0	0.0	0.0	0.0	1.0	0.0	0.0	0.0	0.0	0.0	0.0	0.0	0.0	1	0	0	0	0
Las Vegas	15.768013044642673	14.293790498313639	11.431662020680836	36.1128904150594	-115.297543725431	Baja Taco	NV	4225 S Fort Apache Rd Spring Valley Las Vegas, NV 89147	5.594711379601839	3.5553480614894135	0.6931471805599453	0	2	0	1	0	0	0.0	0.0	0.0	1.0	0.0	1.0	0.0	1.0	1.0	0.0	0.0	0.0	0.0	0.0	1.0	0.0	0.0	0.0	1.0	0.0	0.0	0.0	0.0	0.0	0.0	0.0	0.0	1	0	0	0	0
Phoenix	3.6199655281784566	6.329425164690893	6.306446828952339	33.419120899999996	-112.0721602	Nina Mason Pulliam Rio Salado Audubon Center	AZ	3131 S Central Ave Phoenix, AZ 85040	3.6375861597263857	2.0794415416798357	0.0	0	2	0	1	0	0	0.0	0.0	0.0	0.0	0.0	0.0	0.0	1.0	0.0	0.0	0.0	0.0	0.0	0.0	0.0	0.0	0.0	0.0	0.0	0.0	0.0	0.0	0.0	0.0	0.0	0.0	0.0	0	0	0	0	0
Las Vegas	14.019853573010582	5.4425618655729044	8.337217020904106	36.0414536282933	-115.15200254768699	Bank of America	NV	505 E Windmill Ln Ste 1E Southeast Las Vegas, NV 89123	4.0943445622221	1.3862943611198906	0.0	0	2	0	1	0	0	0.0	0.0	0.0	0.0	0.0	0.0	0.0	0.0	1.0	0.0	0.0	0.0	0.0	0.0	0.0	0.0	0.0	0.0	0.0	0.0	0.0	0.0	0.0	0.0	0.0	0.0	0.0	0	0	0	0	0
Edinburgh	0.16101948600747054	10.523129635038778	0.8056621061656389	55.9537225	-3.1907037999999996	The Penny Black	EDH	17 W Register Street New Town Edinburgh EH2 2AA	0.0	0.0	0.0	0	0	0	1	0	0	0.0	0.0	0.0	0.0	0.0	0.0	0.0	0.0	1.0	0.0	0.0	0.0	0.0	0.0	0.0	0.0	0.0	0.0	0.0	0.0	0.0	0.0	0.0	0.0	0.0	0.0	0.0	0	0	0	1	0
Pittsburgh	7.170395256994354	26.394660277699295	37.107617199587146	40.45932	-79.919044	Trader Joe's	PA	6343 Penn Ave East Liberty Pittsburgh, PA 15206	6.885509670034818	3.4965075614664802	0.6931471805599453	0	2	0	1	1	0	0.0	0.0	0.0	0.0	0.0	0.0	0.0	0.0	1.0	0.0	0.0	0.0	0.0	0.0	0.0	0.0	0.0	0.0	1.0	0.0	0.0	0.0	0.0	0.0	0.0	0.0	0.0	0	0	0	0	0
Madison	0.8946393063673164	9.554104457677797	0.7913216055161375	43.0684026	-89.39918940000001	LaBahn Arena - UW Madison	WI	105 E Campus Mall Capitol Madison, WI 53715	3.044522437723423	0.0	0.0	0	2	0	1	0	0	0.0	0.0	0.0	0.0	0.0	0.0	0.0	1.0	0.0	0.0	0.0	0.0	0.0	0.0	0.0	0.0	0.0	0.0	0.0	0.0	0.0	0.0	0.0	0.0	0.0	0.0	0.0	0	0	0	0	0
Pittsburgh	5.526001288842359	17.198517087078525	38.66580195977448	40.393115	-79.98691099999999	Bishop's Pizza	PA	2104 Brownsville Rd Carrick Pittsburgh, PA 15210	1.6094379124341003	0.6931471805599453	0.0	0	2	0	1	1	0	1.0	0.0	0.0	1.0	0.0	0.0	0.0	1.0	1.0	0.0	0.0	0.0	0.0	0.0	1.0	0.0	0.0	0.0	0.0	0.0	0.0	0.0	0.0	0.0	0.0	0.0	0.0	1	0	0	0	1
Edinburgh	0.3458744227431969	10.948580694781848	1.0051876147374905	55.951095499999994	-3.1842801	Jeffrey St. Whisky and Tobacco	EDH	12-14 Jeffrey Street Old Town Edinburgh EH1 1DT	1.3862943611198906	0.0	0.0	0	2	0	1	1	0	0.0	0.0	0.0	0.0	0.0	0.0	0.0	0.0	1.0	0.0	0.0	0.0	0.0	0.0	0.0	0.0	0.0	0.0	0.0	0.0	0.0	0.0	0.0	0.0	0.0	0.0	0.0	0	0	0	0	0
Las Vegas	14.387552903467116	6.078237676428739	8.24241659517008	36.0407804215355	-115.171651705947	Steiner's A Nevada Style Pub	NV	8168 Las Vegas Blvd S Southeast Las Vegas, NV 89123	7.156176637480615	4.51085950651685	1.0986122886681098	0	1	0	0	1	2	0.0	0.0	0.0	1.0	1.0	0.0	1.0	0.0	1.0	0.0	1.0	0.0	0.0	0.0	1.0	0.0	0.0	0.0	1.0	0.0	0.0	0.0	0.0	0.0	0.0	0.0	0.0	1	0	0	1	0
Las Vegas	13.081107207393362	9.905338468112548	12.961611102958113	36.0847797554012	-115.03158217888901	Jack in the Box	NV	6451 Boulder Hwy Southeast Las Vegas, NV 89122	4.700480365792417	2.1972245773362196	0.0	0	2	0	1	0	0	0.0	0.0	1.0	1.0	0.0	0.0	0.0	1.0	1.0	0.0	0.0	0.0	0.0	0.0	1.0	0.0	0.0	0.0	0.0	0.0	0.0	0.0	0.0	0.0	0.0	0.0	0.0	1	0	1	0	0
Charlotte	18.69641028303525	26.84540986590974	16.479924510665136	35.054034	-80.846312	Firestone Complete Auto Care	NC	15220 John J Delaney Dr Ballantyne Charlotte, NC 28277	2.3978952727983707	0.6931471805599453	0.0	0	2	0	1	0	0	0.0	0.0	0.0	0.0	0.0	0.0	0.0	0.0	0.0	0.0	0.0	0.0	0.0	0.0	0.0	0.0	0.0	0.0	0.0	0.0	0.0	0.0	0.0	0.0	0.0	0.0	0.0	0	0	0	0	0
Phoenix	18.726155578321144	15.70196410224996	20.912079093179454	33.2961356	-111.99628600000001	Spooner Physical Therapy Ahwatukee	AZ	16611 S 40th St Ste 130 Phoenix, AZ 85048	3.6375861597263857	1.3862943611198906	0.0	0	2	0	1	0	0	0.0	0.0	0.0	0.0	0.0	0.0	0.0	0.0	0.0	0.0	0.0	0.0	0.0	0.0	0.0	0.0	0.0	0.0	0.0	0.0	0.0	0.0	0.0	0.0	0.0	0.0	0.0	0	0	0	0	0
Phoenix	15.511389443065191	16.129165246518845	12.712650446568537	33.582644200000004	-112.01586850000001	Rancho Sierra Apts	AZ	3040 E Shea Boulevard Ofc Phoenix, AZ 85028	0.0	0.0	0.0	0	2	0	1	0	0	0.0	0.0	0.0	0.0	0.0	0.0	0.0	0.0	0.0	0.0	0.0	0.0	0.0	0.0	0.0	0.0	0.0	0.0	0.0	0.0	0.0	0.0	0.0	0.0	0.0	0.0	0.0	0	0	0	0	0
Madison	0.715293495505049	8.169132146881031	1.5505134289075335	43.0768066	-89.3843109	Madison Children's Museum	WI	100 N Hamilton St Capitol Madison, WI 53703	4.812184355372417	2.1972245773362196	0.0	0	2	0	1	0	0	0.0	0.0	0.0	0.0	0.0	0.0	0.0	1.0	0.0	0.0	0.0	0.0	0.0	0.0	0.0	0.0	0.0	0.0	0.0	0.0	0.0	0.0	0.0	0.0	0.0	0.0	0.0	0	0	0	0	0
Phoenix	9.697581903546542	8.02029832675646	7.42540303853613	33.5089944	-111.9956848	The Shoe Shop	AZ	3963 E Camelback Rd Phoenix, AZ 85018	2.3978952727983707	0.6931471805599453	0.0	0	2	0	1	0	0	0.0	0.0	0.0	0.0	0.0	0.0	0.0	0.0	1.0	0.0	0.0	0.0	0.0	0.0	0.0	0.0	0.0	0.0	1.0	0.0	0.0	0.0	0.0	0.0	0.0	0.0	0.0	0	0	0	0	0
Phoenix	9.277408443535906	3.197861678961245	8.98625963000554	33.446195133741	-111.97493461418999	Stockyards Restaurant	AZ	5009 E Washington St Ste 115 Phoenix, AZ 85034	6.1092475827643655	3.58351893845611	0.0	0	1	0	0	2	0	0.0	0.0	0.0	1.0	1.0	0.0	1.0	0.0	1.0	1.0	0.0	0.0	0.0	0.0	1.0	0.0	0.0	0.0	1.0	0.0	0.0	0.0	0.0	0.0	0.0	0.0	0.0	1	0	0	0	0
Phoenix	9.905696785156868	11.749660034324473	7.112155712966782	33.538022999999995	-112.04716129999998	McDonald's	AZ	1601 E Glendale Ave Phoenix, AZ 85020	4.897839799950911	2.0794415416798357	0.0	2	2	0	0	0	0	0.0	0.0	1.0	1.0	0.0	0.0	0.0	1.0	1.0	0.0	0.0	0.0	0.0	0.0	1.0	0.0	0.0	0.0	0.0	0.0	0.0	0.0	0.0	0.0	0.0	0.0	0.0	1	0	1	0	0
Pittsburgh	4.367480207092289	24.668979121110564	40.802699942610474	40.469009	-79.96321999999999	Rite Aid	PA	3939 Butler Street Lawrenceville Pittsburgh, PA 15201	4.2626798770413155	1.0986122886681098	0.0	0	2	0	1	1	0	0.0	0.0	0.0	0.0	0.0	0.0	0.0	0.0	1.0	0.0	0.0	0.0	0.0	0.0	0.0	0.0	0.0	0.0	1.0	0.0	0.0	0.0	0.0	0.0	0.0	0.0	0.0	0	0	0	0	0
Phoenix	6.101745392733163	6.781998821434631	3.608632186872133	33.4946035	-112.0334101	Phoenix Lamps, Shades & Antiques	AZ	2225 E Indian School Rd Phoenix, AZ 85016	2.3978952727983707	0.6931471805599453	0.0	0	2	0	1	1	0	0.0	0.0	0.0	0.0	0.0	0.0	0.0	0.0	1.0	0.0	0.0	0.0	0.0	0.0	0.0	0.0	0.0	0.0	1.0	0.0	0.0	0.0	0.0	0.0	0.0	0.0	0.0	0	0	0	0	0
Las Vegas	13.389959399332222	13.262191010923432	9.924304896290792	36.13345	-115.278488	Glenda Slatkin, LMT	NV	3100 S Durango Dr Westside Las Vegas, NV 89147	0.0	0.0	0.0	0	2	0	1	1	0	0.0	0.0	0.0	0.0	0.0	0.0	0.0	0.0	1.0	0.0	0.0	0.0	0.0	0.0	0.0	0.0	0.0	0.0	1.0	0.0	0.0	0.0	0.0	0.0	0.0	0.0	0.0	0	0	0	0	0
Charlotte	2.2113189979147583	25.17101538167781	1.5058142094542062	35.213186	-80.81952690000001	Sami MacDonald	NC	1920 E 7th St Elizabeth Charlotte, NC 28204	0.0	0.0	0.0	0	2	0	1	0	0	0.0	0.0	0.0	0.0	0.0	0.0	0.0	0.0	0.0	0.0	0.0	0.0	0.0	0.0	0.0	0.0	0.0	0.0	0.0	0.0	0.0	0.0	0.0	0.0	0.0	0.0	0.0	0	0	0	0	0
Charlotte	3.025461612993124	25.127479463157275	1.068097754302042	35.198190999999994	-80.825942	Fresh Boutique	NC	813 Providence Rd Elizabeth Charlotte, NC 28207	0.0	0.0	0.0	0	2	0	1	3	0	0.0	0.0	0.0	0.0	0.0	0.0	0.0	0.0	1.0	0.0	0.0	0.0	0.0	0.0	0.0	0.0	0.0	0.0	1.0	0.0	0.0	0.0	0.0	0.0	0.0	0.0	0.0	0	0	0	0	0
Madison	5.89175070947	6.803731033702981	6.733415806869713	43.083996899999995	-89.3214239	Packer Inn	WI	300 Cottage Grove Rd Eastmorland Madison, WI 53716	0.0	0.0	0.0	0	2	0	1	0	0	0.0	0.0	0.0	0.0	0.0	0.0	0.0	0.0	0.0	0.0	0.0	0.0	0.0	0.0	0.0	0.0	0.0	0.0	0.0	0.0	0.0	0.0	0.0	0.0	0.0	0.0	0.0	0	0	0	1	0
Charlotte	12.355584391303383	22.539115993640703	12.047195721751981	35.280145399999995	-80.7248392	Interior Motives	NC	2425 S Blvd Eastland Charlotte, NC 28203	0.0	0.0	0.0	0	2	0	1	2	0	0.0	0.0	0.0	0.0	0.0	0.0	0.0	0.0	1.0	0.0	0.0	0.0	0.0	0.0	0.0	0.0	0.0	0.0	1.0	0.0	0.0	0.0	0.0	0.0	0.0	0.0	0.0	0	0	0	0	0
Las Vegas	11.119451738490664	7.750465894814803	5.337606858452476	36.0993613	-115.2266356	Fat Moe's Pizza & Wings	NV	6125 W Tropicana Ave Ste F Las Vegas, NV 89103	3.912023005428146	1.791759469228055	0.0	2	2	0	1	0	0	1.0	0.0	0.0	1.0	1.0	1.0	1.0	1.0	1.0	0.0	0.0	0.0	0.0	0.0	1.0	0.0	0.0	0.0	1.0	0.0	0.0	0.0	0.0	0.0	0.0	0.0	0.0	1	0	0	0	1
Las Vegas	17.45985980724297	9.027625259968413	12.490326642249611	36.0102586735453	-115.11999660206699	Pier 1 Imports	NV	9887 S Eastern Ave Southeast Las Vegas, NV 89183	4.406719247264253	1.3862943611198906	0.0	0	2	0	1	1	0	0.0	0.0	0.0	0.0	0.0	0.0	0.0	0.0	1.0	0.0	0.0	0.0	0.0	0.0	0.0	0.0	0.0	0.0	1.0	0.0	0.0	0.0	0.0	0.0	0.0	0.0	0.0	0	0	0	0	0
Charlotte	20.271614540104554	28.620979988532735	18.227467766957783	35.0405496485182	-80.8614063262939	Pio Pio Ballantyne	NC	15025 Lancaster Hwy Ste D-1 Ballantyne Charlotte, NC 28277	4.700480365792417	2.3978952727983707	0.6931471805599453	0	1	0	1	1	0	0.0	1.0	0.0	1.0	1.0	1.0	1.0	1.0	1.0	1.0	0.0	0.0	0.0	0.0	1.0	0.0	0.0	0.0	1.0	0.0	0.0	0.0	0.0	0.0	0.0	0.0	0.0	1	0	0	0	0
Phoenix	16.993551087568044	13.334997758302553	18.97089436568953	33.318887065932195	-111.983434746658	Kirkland's	AZ	4619 E Ray Rd Ste E 2 Phoenix, AZ 85044	2.0794415416798357	0.0	0.0	0	2	0	1	1	0	0.0	0.0	0.0	0.0	0.0	0.0	0.0	0.0	1.0	0.0	0.0	0.0	0.0	0.0	0.0	0.0	0.0	0.0	0.0	0.0	0.0	0.0	0.0	0.0	0.0	0.0	0.0	0	0	0	0	0
Phoenix	16.915968885883444	13.26292817037381	18.894023668978786	33.319484	-111.9838697	Comeley Nails	AZ	4601 E Ray Rd Phoenix, AZ 85044	2.4849066497880004	1.0986122886681098	0.0	0	2	0	1	1	0	0.0	0.0	0.0	0.0	0.0	0.0	0.0	0.0	1.0	0.0	0.0	0.0	0.0	0.0	0.0	0.0	0.0	0.0	1.0	0.0	0.0	0.0	0.0	0.0	0.0	0.0	0.0	0	0	0	0	0
Phoenix	26.303637476626463	25.263735661410276	23.57336268484373	33.6556844	-111.93002790000001	Jimmy John's	AZ	7000 E Mayo Blvd Ste 1046 Phoenix, AZ 85054	3.044522437723423	1.0986122886681098	0.0	3	2	0	1	0	0	1.0	0.0	0.0	1.0	0.0	1.0	0.0	1.0	1.0	0.0	0.0	0.0	0.0	0.0	1.0	0.0	0.0	0.0	0.0	0.0	0.0	0.0	0.0	0.0	0.0	0.0	0.0	1	1	0	0	0
Phoenix	3.0060262877144384	9.251502927612552	3.3718088057734983	33.4682066	-112.10014609999999	Affordable Auto Repair	AZ	1901 W Granada Rd Phoenix, AZ 85009	0.0	0.0	0.0	0	2	0	1	0	0	0.0	0.0	0.0	0.0	0.0	0.0	0.0	0.0	0.0	0.0	0.0	0.0	0.0	0.0	0.0	0.0	0.0	0.0	0.0	0.0	0.0	0.0	0.0	0.0	0.0	0.0	0.0	0	0	0	0	0
Las Vegas	12.241580159319735	16.833172858751226	12.989125189133386	36.204594	-115.26359	Y-Not Fix-It & Sons	NV	2509 Sea Venture Dr Summerlin Las Vegas, NV 89128	0.0	0.0	0.0	0	2	0	1	0	0	0.0	0.0	0.0	0.0	0.0	0.0	0.0	0.0	1.0	0.0	0.0	0.0	0.0	0.0	0.0	0.0	0.0	0.0	0.0	0.0	0.0	0.0	0.0	0.0	0.0	0.0	0.0	0	0	0	0	0
Las Vegas	15.787127181933851	7.386847184800672	10.926141104970094	36.025345	-115.120602	Las Vegas Athletic Club	NV	9065 S Eastern Ave Southeast Las Vegas, NV 89123	9.089414904047302	5.602118820879701	1.791759469228055	0	2	0	1	0	0	0.0	0.0	0.0	0.0	0.0	0.0	0.0	1.0	0.0	0.0	0.0	0.0	0.0	0.0	0.0	0.0	0.0	0.0	0.0	0.0	0.0	0.0	0.0	0.0	0.0	0.0	0.0	0	0	0	0	0
Edinburgh	0.46782067025812957	11.081887748386231	1.1231966400325342	55.950796200000006	-3.1821892999999997	Artcafe Morita	EDH	204 Canongate Old Town Edinburgh EH8 8DQ	0.0	0.0	0.0	0	2	0	1	0	0	0.0	0.0	0.0	0.0	0.0	0.0	0.0	0.0	0.0	0.0	0.0	0.0	0.0	0.0	0.0	0.0	0.0	0.0	0.0	0.0	0.0	0.0	0.0	0.0	0.0	0.0	0.0	1	0	0	0	0
Phoenix	3.506917137079311	5.475988885781884	1.6390208151236243	33.4737734	-112.04749	Tacos Mexico	AZ	2333 N 16th St Phoenix, AZ 85006	2.3978952727983707	0.0	0.0	0	1	0	1	0	0	0.0	1.0	0.0	1.0	1.0	0.0	0.0	1.0	1.0	0.0	0.0	0.0	0.0	0.0	1.0	0.0	0.0	0.0	0.0	0.0	0.0	0.0	0.0	0.0	0.0	0.0	0.0	1	0	0	0	0
Charlotte	1.1711255398988367	26.446781617314617	2.3360934893889995	35.2133541062856	-80.8345772705002	Pizzeria Omaggio	NC	1055 Metropolitan Ave Ste 130 Myers Park Charlotte, NC 28204	3.8501476017100584	2.1972245773362196	0.0	0	0	0	0	1	0	0.0	1.0	0.0	1.0	1.0	1.0	0.0	1.0	1.0	0.0	0.0	0.0	0.0	0.0	1.0	0.0	1.0	0.0	0.0	1.0	0.0	0.0	0.0	0.0	0.0	0.0	0.0	1	0	0	0	1
Phoenix	17.34065431664709	13.482273594473872	19.25680118509258	33.3186522	-111.9766189	Eyemasters	AZ	4933 E Ray Rd Ste 103 Phoenix, AZ 85044	2.302585092994046	0.0	0.0	0	2	0	1	1	0	0.0	0.0	0.0	0.0	0.0	0.0	0.0	0.0	1.0	0.0	0.0	0.0	0.0	0.0	0.0	0.0	0.0	0.0	0.0	0.0	0.0	0.0	0.0	0.0	0.0	0.0	0.0	0	0	0	0	0
Phoenix	17.22348090636258	19.547998651730914	14.546405945546482	33.6068099581456	-112.06565044820299	Zella's Pizza & Cheesesteaks	AZ	13240 N 7th St Phoenix, AZ 85022	3.332204510175204	2.0794415416798357	0.0	2	2	0	0	0	0	1.0	0.0	0.0	1.0	0.0	1.0	1.0	1.0	1.0	0.0	0.0	0.0	0.0	0.0	1.0	0.0	0.0	0.0	1.0	0.0	0.0	0.0	0.0	0.0	0.0	0.0	0.0	1	0	0	0	1
Pittsburgh	12.82933816876207	32.28968199654091	35.939845204703886	40.492507	-79.864475	Allegheny Smokeworks	PA	217 Freeport Rd Pittsburgh, PA 15238	3.1354942159291497	1.0986122886681098	0.0	0	2	0	1	1	0	0.0	0.0	0.0	0.0	0.0	0.0	0.0	0.0	1.0	0.0	0.0	0.0	0.0	0.0	0.0	0.0	1.0	0.0	1.0	0.0	0.0	0.0	0.0	0.0	0.0	0.0	0.0	0	0	0	0	0
Phoenix	20.83549616084936	23.198006585319256	18.187242531523875	33.6395383	-112.07175459999999	Officemax	AZ	245 E Bell Rd Phoenix, AZ 85022	3.8918202981106265	1.3862943611198906	0.0	0	2	0	1	0	0	0.0	0.0	0.0	0.0	0.0	0.0	0.0	0.0	1.0	0.0	0.0	0.0	0.0	0.0	0.0	0.0	0.0	0.0	0.0	0.0	0.0	0.0	0.0	0.0	0.0	0.0	0.0	0	0	0	0	0
Las Vegas	7.509472199143756	2.848962325489114	1.2095906869328528	36.104494200000005	-115.16728529999999	The King Starring Trent Carlini	NV	Shimmer Cabaret at LVH 3000 Paradise Rd Eastside Las Vegas, NV 89109	2.8903717578961645	0.6931471805599453	0.0	0	2	0	1	0	0	0.0	0.0	0.0	0.0	0.0	0.0	0.0	1.0	0.0	0.0	0.0	0.0	0.0	0.0	0.0	0.0	0.0	0.0	0.0	0.0	0.0	0.0	0.0	0.0	0.0	0.0	0.0	0	0	0	0	0
Edinburgh	0.6999879474694929	11.233905681824984	1.5862381001286094	55.956776399999995	-3.1789886000000003	The Crown Plaza	EDH	Royal Terrace Edinburgh	2.0794415416798357	1.3862943611198906	0.0	0	2	0	1	0	0	0.0	0.0	0.0	0.0	0.0	0.0	0.0	0.0	0.0	0.0	0.0	0.0	0.0	0.0	0.0	0.0	0.0	0.0	0.0	0.0	0.0	0.0	0.0	0.0	0.0	0.0	0.0	0	0	0	0	0
Charlotte	0.6580407238057817	27.88125293319387	4.084106729851514	35.227795	-80.844257	Laz Parking	NC	101 N Tryon St Ste 1060 Charlotte, NC 28246	0.0	0.0	0.0	0	2	0	1	0	0	0.0	0.0	0.0	0.0	0.0	0.0	0.0	0.0	0.0	0.0	0.0	0.0	0.0	0.0	0.0	0.0	0.0	0.0	0.0	0.0	0.0	0.0	0.0	0.0	0.0	0.0	0.0	0	0	0	0	0
Charlotte	14.402002677496997	24.687512329916117	14.592631103100105	35.307084100000004	-80.72093670000001	One Stop Smoke Shop	NC	9630 University City Blvd Ste E University City Charlotte, NC 28213	0.0	0.6931471805599453	0.0	0	2	0	1	2	0	0.0	0.0	0.0	0.0	0.0	0.0	0.0	0.0	1.0	0.0	0.0	0.0	0.0	0.0	0.0	0.0	0.0	0.0	0.0	0.0	0.0	0.0	0.0	0.0	0.0	0.0	0.0	0	0	0	0	0
Edinburgh	0.45147497408494863	10.244226363929709	0.5168067527667182	55.95249499999999	-3.1953675	The Works	EDH	63 Princes Street New Town New Town Edinburgh EH2 2DF	2.3978952727983707	1.0986122886681098	0.0	0	2	0	1	0	0	0.0	0.0	0.0	0.0	0.0	0.0	0.0	0.0	1.0	0.0	0.0	0.0	0.0	0.0	0.0	0.0	0.0	0.0	0.0	0.0	0.0	0.0	0.0	0.0	0.0	0.0	0.0	0	0	0	0	0
Las Vegas	12.219259581246225	3.6421877211390408	6.668732117387181	36.05753	-115.149172	Subway	NV	600 E Warm Springs Rd Southeast Las Vegas, NV 89119	4.406719247264253	2.302585092994046	0.0	1	2	0	1	0	0	0.0	0.0	0.0	1.0	0.0	0.0	0.0	1.0	1.0	0.0	0.0	0.0	0.0	0.0	1.0	0.0	0.0	0.0	0.0	0.0	0.0	0.0	0.0	0.0	0.0	0.0	0.0	1	1	1	0	0
Phoenix	5.743054952525852	5.918689942574847	3.5220327903235784	33.4874299	-112.02978279999999	Lowdown Cafe	AZ	2407 E Osborn Rd Phoenix, AZ 85016	0.0	0.0	0.0	0	2	0	1	0	0	1.0	1.0	0.0	0.0	0.0	0.0	0.0	1.0	1.0	0.0	0.0	0.0	0.0	0.0	1.0	0.0	0.0	0.0	1.0	0.0	0.0	0.0	0.0	0.0	0.0	0.0	0.0	1	1	0	0	0
Las Vegas	15.967915392675758	9.139904459191097	9.393913629592806	36.0426434	-115.2246278	Chicsincity	NV	6030 W Windmill Ln Unit C Southwest Las Vegas, NV 89139	2.772588722239781	1.0986122886681098	0.0	0	2	0	1	1	0	0.0	0.0	0.0	0.0	0.0	0.0	0.0	0.0	1.0	0.0	0.0	0.0	0.0	0.0	0.0	0.0	0.0	0.0	0.0	0.0	0.0	0.0	0.0	0.0	0.0	0.0	0.0	0	0	0	0	0
Las Vegas	7.827390964045673	3.1622561211945914	1.3283660370772241	36.1031723	-115.1723638	Subway	NV	3785 Las Vegas Blvd S Ste 203 The Strip Las Vegas, NV 89109	0.0	0.0	0.0	0	2	0	1	0	0	0.0	0.0	0.0	0.0	0.0	0.0	0.0	0.0	0.0	0.0	0.0	0.0	0.0	0.0	0.0	0.0	0.0	0.0	0.0	0.0	0.0	0.0	0.0	0.0	0.0	0.0	0.0	1	1	1	0	0
Las Vegas	12.752515682817716	15.392627986687804	11.612540248513774	36.174172799999994	-115.2770747	Bounty Hunters	NV	8450 Westcliff Drive Westside Las Vegas, NV 89145	4.110873864173311	0.6931471805599453	0.0	0	1	0	1	0	0	0.0	0.0	0.0	1.0	1.0	0.0	0.0	0.0	1.0	0.0	1.0	1.0	0.0	0.0	0.0	0.0	0.0	0.0	0.0	0.0	0.0	0.0	1.0	0.0	0.0	0.0	0.0	0	0	0	1	0
Las Vegas	15.5641973016641	18.753192437673565	14.961430123415845	36.1939724275653	-115.305411929661	GNC	NV	1930 Village Center Cir Summerlin Las Vegas, NV 89134	2.3978952727983707	0.6931471805599453	0.0	0	2	0	1	1	0	0.0	0.0	0.0	0.0	0.0	0.0	0.0	0.0	1.0	0.0	0.0	0.0	0.0	0.0	0.0	0.0	0.0	0.0	0.0	0.0	0.0	0.0	0.0	0.0	0.0	0.0	0.0	0	0	0	0	0
Phoenix	5.6592310766604035	7.056688942063102	3.0334951486880475	33.494446999999994	-112.041257	Ferguson	AZ	1845 E Indian School Rd Phoenix, AZ 85016	2.5649493574615367	1.3862943611198906	0.0	0	2	0	1	0	0	0.0	0.0	0.0	0.0	0.0	0.0	0.0	0.0	1.0	0.0	0.0	0.0	0.0	0.0	0.0	0.0	0.0	0.0	0.0	0.0	0.0	0.0	0.0	0.0	0.0	0.0	0.0	0	0	0	0	0
Pittsburgh	6.62046003815756	23.805624782787113	35.616951538389486	40.428579299999996	-79.92431640000001	D & M Nails	PA	2711 Murray Ave Squirrel Hill Pittsburgh, PA 15217	2.70805020110221	2.1972245773362196	0.0	0	2	0	1	1	0	0.0	0.0	0.0	0.0	0.0	0.0	0.0	0.0	1.0	0.0	0.0	0.0	0.0	0.0	0.0	0.0	1.0	0.0	0.0	0.0	0.0	0.0	0.0	0.0	0.0	0.0	0.0	0	0	0	0	0
Charlotte	12.330443596183269	26.066853075868156	12.992073527322022	35.304587299999994	-80.74964770000001	Walgreens	NC	8538 N Tryon St University City Charlotte, NC 28262	4.418840607796598	0.6931471805599453	0.0	0	2	0	1	1	0	0.0	0.0	0.0	0.0	0.0	0.0	0.0	0.0	1.0	0.0	0.0	0.0	0.0	0.0	0.0	0.0	0.0	0.0	1.0	0.0	0.0	0.0	0.0	0.0	0.0	0.0	0.0	0	0	0	0	0
Las Vegas	9.55550138191721	10.523681490953889	6.814514270942384	36.1434734	-115.2377133	Mix 94.1	NV	6655 W Sahara Ave Ste C216 Westside Las Vegas, NV 89146	2.3978952727983707	1.0986122886681098	0.0	0	2	0	1	0	0	0.0	0.0	0.0	0.0	0.0	0.0	0.0	0.0	0.0	0.0	0.0	0.0	0.0	0.0	0.0	0.0	0.0	0.0	0.0	0.0	0.0	0.0	0.0	0.0	0.0	0.0	0.0	0	0	0	0	0
Pittsburgh	1.3598248608184116	21.649120542683512	41.373009353288424	40.448882299999994	-79.9873238	Little Shanghai	PA	1611 Penn Ave Strip District Pittsburgh, PA 15222	2.3978952727983707	0.6931471805599453	0.0	2	2	0	1	1	0	0.0	0.0	0.0	1.0	1.0	0.0	1.0	1.0	1.0	0.0	0.0	0.0	0.0	0.0	1.0	0.0	1.0	0.0	0.0	0.0	0.0	0.0	0.0	0.0	0.0	0.0	0.0	1	0	0	0	0
Las Vegas	14.765324491307629	12.526025711403209	9.892506429595198	36.103207299999994	-115.27949479999998	Bootleg Benny's	NV	4705 S Durango Dr Ste 140 Spring Valley Las Vegas, NV 89147	2.995732273553991	1.791759469228055	0.0	0	1	0	1	0	2	0.0	0.0	0.0	1.0	1.0	0.0	0.0	0.0	1.0	0.0	1.0	0.0	0.0	0.0	0.0	0.0	0.0	0.0	1.0	0.0	0.0	0.0	0.0	0.0	0.0	1.0	0.0	0	0	0	1	0
Pittsburgh	2.142399517988602	20.293931247195527	39.887135340656876	40.4291032	-79.98138859999999	S Bar	PA	1713 E Carson St South Side Pittsburgh, PA 15203	2.833213344056216	1.6094379124341003	0.0	0	1	0	1	0	0	0.0	0.0	0.0	0.0	0.0	0.0	0.0	0.0	1.0	0.0	0.0	0.0	0.0	0.0	0.0	0.0	0.0	0.0	0.0	0.0	0.0	1.0	0.0	0.0	0.0	0.0	0.0	0	0	0	1	0
Pittsburgh	8.086572097878737	12.493659469803816	45.29579635193566	40.392286999999996	-80.070269	Benihana	PA	2100 Greentree Rd Pittsburgh, PA 15220	4.330733340286331	2.302585092994046	0.6931471805599453	0	1	0	1	2	0	0.0	0.0	0.0	1.0	1.0	1.0	1.0	1.0	1.0	1.0	1.0	0.0	0.0	0.0	1.0	1.0	0.0	0.0	1.0	0.0	0.0	0.0	0.0	0.0	0.0	0.0	0.0	1	0	0	0	0
Las Vegas	7.058205785723291	5.177877641563598	1.4860083860340618	36.1186984	-115.1864851	Rio Spa & Salon	NV	3700 W Flamingo Rd Las Vegas, NV 89103	4.9344739331306915	1.0986122886681098	0.0	0	2	0	1	2	0	0.0	0.0	0.0	0.0	0.0	0.0	0.0	0.0	1.0	0.0	0.0	0.0	0.0	0.0	0.0	0.0	0.0	0.0	0.0	1.0	0.0	0.0	0.0	0.0	0.0	0.0	0.0	0	0	0	0	0
Phoenix	2.5676881713802304	5.187345218781055	1.6333487715380806	33.4654685	-112.0522962	Rainbow Donut	AZ	1347 E McDowell Rd Phoenix, AZ 85006	5.030437921392435	3.1354942159291497	0.0	0	2	0	1	0	0	0.0	0.0	0.0	1.0	0.0	0.0	1.0	1.0	1.0	0.0	0.0	0.0	0.0	0.0	1.0	0.0	0.0	0.0	1.0	0.0	0.0	0.0	0.0	0.0	0.0	0.0	0.0	0	0	0	0	0
Phoenix	26.102267860686236	24.97887858699708	23.38160807521288	33.6524229	-111.9277668	Starpower	AZ	7077 E Mayo Blvd Ste 120 Phoenix, AZ 85054	1.9459101490553132	0.6931471805599453	0.0	0	2	0	1	2	0	0.0	0.0	0.0	0.0	0.0	0.0	0.0	0.0	1.0	0.0	0.0	0.0	0.0	0.0	0.0	0.0	0.0	0.0	1.0	0.0	0.0	0.0	0.0	0.0	0.0	0.0	0.0	0	0	0	0	0
Charlotte	5.0240665303724645	25.148105047028977	5.650426721805073	35.248922	-80.796175	CrossFit NoDa	NC	624 Anderson St NoDa Charlotte, NC 28205	0.0	0.0	0.0	0	2	0	1	0	0	0.0	0.0	0.0	0.0	0.0	0.0	0.0	1.0	0.0	0.0	0.0	0.0	0.0	0.0	0.0	0.0	0.0	0.0	0.0	0.0	0.0	0.0	0.0	0.0	0.0	0.0	0.0	0	0	0	0	0
Edinburgh	1.7493631317993295	9.968361315449837	0.9737146232054773	55.9400591	-3.2034756	The Golf Tavern	EDH	30-31 Wrights Houses Edinburgh The Meadows Edinburgh EH10 4HR	4.276666119016055	1.0986122886681098	0.0	0	1	0	1	1	1	0.0	1.0	0.0	1.0	1.0	0.0	0.0	0.0	1.0	0.0	0.0	0.0	0.0	0.0	0.0	0.0	1.0	0.0	0.0	0.0	0.0	0.0	0.0	0.0	0.0	1.0	0.0	0	0	0	1	0
Las Vegas	6.254161349933425	6.384690138638644	2.5364593343949435	36.131803000000005	-115.18978100000001	Nevada Wellness Center	NV	3200 S Valley View Westside Las Vegas, NV 89102	1.3862943611198906	0.0	0.0	0	2	0	1	0	0	0.0	0.0	0.0	0.0	0.0	0.0	0.0	0.0	0.0	0.0	0.0	0.0	0.0	0.0	0.0	0.0	0.0	0.0	0.0	0.0	0.0	0.0	0.0	0.0	0.0	0.0	0.0	0	0	0	0	0
Phoenix	6.629390817071979	13.041629862823182	7.416729963449565	33.4655876	-112.14385779999999	Sonrisa Family Dentistry	AZ	3911 W McDowell Rd Ste 15 Phoenix, AZ 85009	0.0	0.0	0.0	0	2	0	1	0	0	0.0	0.0	0.0	0.0	0.0	0.0	0.0	0.0	0.0	0.0	0.0	0.0	0.0	0.0	0.0	0.0	0.0	0.0	0.0	0.0	0.0	0.0	0.0	0.0	0.0	0.0	0.0	0	0	0	0	0
Las Vegas	7.689663108865287	2.3654753451816557	5.0558414064764206	36.099300799999995	-115.11791540000002	Taqueria El Tizon Grill 2	NV	4912 S Eastern Ave Ste 1 Southeast Las Vegas, NV 89119	4.74493212836325	2.6390573296152584	0.0	0	2	0	1	0	0	0.0	0.0	0.0	1.0	1.0	1.0	0.0	1.0	1.0	0.0	0.0	0.0	0.0	0.0	1.0	0.0	0.0	0.0	1.0	0.0	0.0	0.0	0.0	0.0	0.0	0.0	0.0	1	0	0	0	0
Phoenix	6.602402507708346	10.258928797145755	4.0357167187884	33.511227000000005	-112.074148	Ken Elder - Long Realty	AZ	5102 N Central Ave Phoenix, AZ 85012	0.0	0.0	0.0	0	2	0	1	0	0	0.0	0.0	0.0	0.0	0.0	0.0	0.0	0.0	1.0	0.0	0.0	0.0	0.0	0.0	0.0	0.0	0.0	0.0	0.0	0.0	0.0	0.0	0.0	0.0	0.0	0.0	0.0	0	0	0	0	0
Phoenix	8.820172190786977	3.4117793850833724	9.895804769030246	33.4085795	-111.9948098	Auto Glass Excellence	AZ	4012 E Broadway Rd Phoenix, AZ 85040	0.0	0.0	0.0	0	2	0	1	0	0	0.0	0.0	0.0	0.0	0.0	0.0	0.0	0.0	0.0	0.0	0.0	0.0	0.0	0.0	0.0	0.0	0.0	0.0	0.0	0.0	0.0	0.0	0.0	0.0	0.0	0.0	0.0	0	0	0	0	0
Las Vegas	15.941217203722703	22.859334615501037	19.215393193985246	36.274896999999996	-115.252802	StorageOne	NV	6275 N Tenaya Way Centennial Las Vegas, NV 89130	0.0	0.6931471805599453	0.0	0	2	0	1	0	0	0.0	0.0	0.0	0.0	0.0	0.0	0.0	0.0	1.0	0.0	0.0	0.0	0.0	0.0	0.0	0.0	0.0	0.0	0.0	0.0	0.0	0.0	0.0	0.0	0.0	0.0	0.0	0	0	0	0	0
Pittsburgh	4.844012933505497	24.826883750813263	39.484435655202304	40.462554299999994	-79.95017299999999	Lot 17	PA	4617 Liberty Ave Bloomfield Pittsburgh, PA 15224	4.6913478822291435	2.4849066497880004	0.0	0	1	0	0	1	1	0.0	1.0	0.0	1.0	1.0	1.0	1.0	0.0	1.0	0.0	1.0	0.0	0.0	0.0	1.0	0.0	1.0	0.0	0.0	0.0	0.0	0.0	0.0	0.0	0.0	1.0	1.0	1	0	0	1	0
Phoenix	10.502739610187838	15.200703333421405	8.56196527069693	33.539537599999996	-112.11672140000002	Flores Air Conditioning and Heating	AZ	7027 N 27th Ave Phoenix, AZ 85051	0.0	1.0986122886681098	0.0	0	2	0	1	0	0	0.0	0.0	0.0	0.0	0.0	0.0	0.0	0.0	1.0	0.0	0.0	0.0	0.0	0.0	0.0	0.0	0.0	0.0	0.0	0.0	0.0	0.0	0.0	0.0	0.0	0.0	0.0	0	0	0	0	0
Charlotte	12.854745065298474	26.55992189968654	13.606665079051139	35.310621999999995	-80.749274	Fruiticup	NC	9009 JM Keynes Dr Ste 3 University City Charlotte, NC 28262	4.343805421853684	1.3862943611198906	0.0	0	2	0	1	0	0	0.0	0.0	0.0	0.0	0.0	0.0	0.0	0.0	1.0	0.0	0.0	0.0	0.0	0.0	0.0	0.0	0.0	0.0	1.0	0.0	0.0	0.0	0.0	0.0	0.0	0.0	0.0	0	0	0	0	0
Phoenix	16.443691996342697	15.326823850181247	19.012020284387575	33.304537800000006	-112.05303529999999	Road Ready Inspections	AZ	1345 E Chandler Blvd Phoenix, AZ 85048	0.0	0.0	0.0	0	2	0	1	0	0	0.0	0.0	0.0	0.0	0.0	0.0	0.0	0.0	0.0	0.0	0.0	0.0	0.0	0.0	0.0	0.0	0.0	0.0	0.0	0.0	0.0	0.0	0.0	0.0	0.0	0.0	0.0	0	0	0	0	0
Charlotte	0.38826699506374657	27.761485027462747	3.822929215240687	35.224115641086996	-80.84478314199299	The Nail Lounge	NC	301 S College St Ste 210 Uptown Charlotte, NC 28202	2.772588722239781	1.0986122886681098	0.0	0	2	0	1	1	0	0.0	0.0	0.0	0.0	0.0	0.0	0.0	0.0	1.0	0.0	0.0	0.0	0.0	0.0	0.0	0.0	0.0	0.0	0.0	1.0	0.0	0.0	0.0	0.0	0.0	0.0	0.0	0	0	0	0	0
Las Vegas	13.651821376147181	5.414787168733787	7.484685909725346	36.0476105636845	-115.171724429312	Burger King	NV	7810 Las Vegas Blvd S Southeast Las Vegas, NV 89123	4.5217885770490405	2.833213344056216	0.0	0	2	0	0	0	0	0.0	0.0	1.0	1.0	1.0	0.0	0.0	1.0	1.0	0.0	0.0	0.0	0.0	0.0	1.0	0.0	0.0	0.0	1.0	0.0	0.0	0.0	0.0	0.0	0.0	0.0	0.0	1	0	0	0	0
Phoenix	0.58218760650183	6.7406172145157655	2.357007783719406	33.4566963	-112.07641979999998	Road Dog Tours	AZ	199 N Central Ave Phoenix, AZ 85003	0.0	0.0	0.0	0	2	0	1	0	0	0.0	0.0	0.0	0.0	0.0	0.0	0.0	0.0	1.0	0.0	0.0	0.0	0.0	0.0	0.0	0.0	0.0	0.0	0.0	0.0	0.0	0.0	0.0	0.0	0.0	0.0	0.0	0	0	0	0	0
Phoenix	9.342794048542563	15.719987017824472	10.293023180756474	33.4611886	-112.17435400000001	Gerrick's Custom Exhaust & Auto Repair	AZ	1201 N 54th Ave Ste 101 Phoenix, AZ 85043	0.0	0.6931471805599453	0.0	0	2	0	1	0	0	0.0	0.0	0.0	0.0	0.0	0.0	0.0	0.0	0.0	0.0	0.0	0.0	0.0	0.0	0.0	0.0	0.0	0.0	0.0	0.0	0.0	0.0	0.0	0.0	0.0	0.0	0.0	0	0	0	0	0
Las Vegas	8.652767264436847	0.7756899678381999	3.3424806014609727	36.09	-115.15	Champion Carpet Cleaning	NV	Southeast Las Vegas, NV 89193	0.0	1.0986122886681098	0.0	0	2	0	1	0	0	0.0	0.0	0.0	0.0	0.0	0.0	0.0	0.0	1.0	0.0	0.0	0.0	0.0	0.0	0.0	0.0	0.0	0.0	0.0	0.0	0.0	0.0	0.0	0.0	0.0	0.0	0.0	0	0	0	0	0
Phoenix	0.37105342476488384	6.289338305574016	3.1411115392250277	33.4483771	-112.07403729999999	Pet Club - Phoenix	AZ	21041 Cave Creek Rd Phoenix, AZ 85024	2.0794415416798357	0.6931471805599453	0.0	0	2	0	1	0	0	0.0	0.0	0.0	0.0	0.0	0.0	0.0	0.0	0.0	0.0	0.0	0.0	0.0	0.0	0.0	0.0	0.0	0.0	0.0	0.0	0.0	0.0	0.0	0.0	0.0	0.0	0.0	0	0	0	0	0
Madison	1.4122368306734807	9.937100489639578	0.8453832941008502	43.067871000000004	-89.40714759999999	Wingstop	WI	1234 Regent St South Campus Madison, WI 53715	2.9444389791664403	1.0986122886681098	0.0	0	0	0	1	0	0	0.0	0.0	0.0	0.0	1.0	1.0	0.0	1.0	1.0	0.0	0.0	0.0	0.0	0.0	1.0	0.0	0.0	0.0	1.0	0.0	0.0	0.0	0.0	0.0	0.0	0.0	0.0	1	0	0	0	0
Phoenix	9.161117790824722	15.168026213826987	8.491191844715178	33.505818	-112.14896100000001	We Buy Scrap	AZ	4202 W Highland Ave Phoenix, AZ 85019	0.0	0.0	0.0	0	2	0	1	0	0	0.0	0.0	0.0	0.0	0.0	0.0	0.0	0.0	0.0	0.0	0.0	0.0	0.0	0.0	0.0	0.0	0.0	0.0	0.0	0.0	0.0	0.0	0.0	0.0	0.0	0.0	0.0	0	0	0	0	0
Las Vegas	13.750028657095195	9.281121487612698	7.670482339906207	36.079531	-115.243669	Gregg's Plumbing Supply & More Quick Stop	NV	6015 S Rainbow Blvd Spring Valley Las Vegas, NV 89118	0.0	0.0	0.0	0	2	0	1	0	0	0.0	0.0	0.0	0.0	0.0	0.0	0.0	0.0	0.0	0.0	0.0	0.0	0.0	0.0	0.0	0.0	0.0	0.0	0.0	0.0	0.0	0.0	0.0	0.0	0.0	0.0	0.0	0	0	0	0	0
Las Vegas	16.193199649095128	8.672640015406124	9.652274966578574	36.0336846	-115.2084753	Ohjah Japanese Steakhouse Sushi & Hibachi	NV	8595 S Decatur Blvd Ste 104 Southwest Las Vegas, NV 89139	7.7488913372555315	5.062595033026967	1.0986122886681098	0	1	0	1	1	0	0.0	0.0	0.0	1.0	1.0	0.0	1.0	1.0	1.0	1.0	0.0	0.0	0.0	0.0	1.0	0.0	0.0	0.0	1.0	0.0	0.0	0.0	0.0	0.0	0.0	0.0	0.0	1	0	0	0	0
Phoenix	1.0405650203407262	5.949490789795875	1.9274797859502084	33.458335	-112.06658700000001	The Roose Parlour and Spa	AZ	918 N 6th St Phoenix, AZ 85004	4.653960350157523	3.295836866004329	0.0	0	2	0	1	1	0	0.0	0.0	0.0	0.0	0.0	0.0	0.0	1.0	1.0	0.0	0.0	0.0	0.0	0.0	0.0	0.0	1.0	0.0	0.0	0.0	0.0	0.0	0.0	0.0	0.0	0.0	0.0	0	0	0	0	0
Las Vegas	11.431919314351152	5.186198682113511	8.843353373957013	36.071453999999996	-115.08840459999999	Las Vapors	NV	3980 E Sunset Rd Ste 101 Las Vegas, NV 89120	2.1972245773362196	1.3862943611198906	0.0	0	2	0	1	0	0	0.0	0.0	0.0	0.0	0.0	0.0	0.0	0.0	1.0	0.0	0.0	0.0	0.0	0.0	0.0	0.0	0.0	0.0	1.0	0.0	0.0	0.0	0.0	0.0	0.0	0.0	0.0	0	0	0	0	0
Las Vegas	15.676330120102623	19.469083779646645	15.64043025930687	36.206381	-115.303005	Enterprise Rent-A-Car	NV	9484 W Lake Mead Blvd # 1 Summerlin Las Vegas, NV 89134	2.5649493574615367	2.0794415416798357	1.0986122886681098	0	2	0	1	0	0	0.0	0.0	0.0	0.0	0.0	0.0	0.0	0.0	0.0	0.0	0.0	0.0	0.0	0.0	0.0	0.0	0.0	0.0	0.0	0.0	0.0	0.0	0.0	0.0	0.0	0.0	0.0	0	0	0	0	0
Las Vegas	8.361142085881358	7.6955171302127745	4.096796840757968	36.126501	-115.213867	2010 Fusion Restaurant	NV	5300 Spring Mountain Rd Ste 101 Chinatown Las Vegas, NV 89146	0.0	1.3862943611198906	0.0	0	1	0	1	0	0	0.0	0.0	0.0	0.0	0.0	0.0	1.0	0.0	1.0	0.0	0.0	0.0	0.0	0.0	1.0	0.0	0.0	0.0	0.0	0.0	0.0	0.0	0.0	0.0	0.0	0.0	0.0	1	0	0	0	0
Las Vegas	10.27007679814953	7.963772876075202	10.569463241580051	36.1021643249769	-115.054294931499	Sally Beauty Supply	NV	5466 Boulder Hwy Las Vegas, NV 89122	3.970291913552122	0.0	0.0	0	2	0	1	1	0	0.0	0.0	0.0	0.0	0.0	0.0	0.0	0.0	1.0	0.0	0.0	0.0	0.0	0.0	0.0	0.0	0.0	0.0	0.0	0.0	0.0	0.0	0.0	0.0	0.0	0.0	0.0	0	0	0	0	0
Phoenix	22.0293786275143	22.440398431466694	19.228429220611353	33.639523100000005	-111.997372	Abrazo Scottsdale Campus	AZ	3929 E Bell Rd Phoenix, AZ 85032	4.852030263919617	1.6094379124341003	0.0	0	2	0	1	0	0	0.0	0.0	0.0	0.0	0.0	0.0	0.0	0.0	0.0	0.0	0.0	0.0	0.0	0.0	0.0	0.0	0.0	0.0	0.0	0.0	0.0	0.0	0.0	0.0	0.0	0.0	0.0	0	0	0	0	0
Edinburgh	0.5510289140027429	10.557578730691443	1.23582337269109	55.958130700000005	-3.1897382999999997	Hamburger Heaven	EDH	36 Broughton Street New Town Edinburgh EH1 3SB	0.0	0.0	0.0	0	1	1	0	1	0	0.0	0.0	0.0	1.0	0.0	0.0	1.0	1.0	1.0	1.0	0.0	0.0	0.0	0.0	0.0	0.0	0.0	0.0	0.0	0.0	0.0	0.0	0.0	0.0	0.0	0.0	0.0	1	0	1	0	0
Phoenix	5.286726824456798	9.766541962332386	3.064580216899265	33.4988393	-112.0829285	Retro Redux	AZ	4303 N 7th Ave Phoenix, AZ 85013	0.0	0.0	0.0	0	2	0	1	0	0	0.0	0.0	0.0	0.0	0.0	0.0	0.0	0.0	0.0	0.0	0.0	0.0	0.0	0.0	0.0	0.0	0.0	0.0	0.0	0.0	0.0	0.0	0.0	0.0	0.0	0.0	0.0	0	0	0	0	0
Charlotte	6.4506954833264105	22.703957200348018	3.2830975344877853	35.171203600000005	-80.80765129999999	Juice Bar Providence Plaza	NC	2907 Providence Rd Ste 101 Bldg A Charlotte, NC 28211	2.6390573296152584	1.3862943611198906	0.0	0	2	0	0	1	0	0.0	0.0	0.0	0.0	0.0	0.0	0.0	0.0	1.0	0.0	0.0	0.0	0.0	0.0	0.0	0.0	0.0	0.0	0.0	0.0	0.0	0.0	0.0	0.0	0.0	0.0	0.0	0	0	0	0	0
Las Vegas	11.455367298947154	15.501935594288152	11.65369606649298	36.1915723	-115.2593102	Beach Pizza	NV	1780 N Buffalo Dr Las Vegas, NV 89128	4.382026634673881	2.0794415416798357	0.0	2	2	0	1	0	0	1.0	1.0	0.0	1.0	0.0	1.0	0.0	1.0	1.0	0.0	0.0	0.0	0.0	0.0	1.0	0.0	0.0	0.0	1.0	0.0	0.0	0.0	0.0	0.0	0.0	0.0	0.0	1	0	0	0	1
Las Vegas	6.854752838532853	11.02865777219514	7.239897271475559	36.171184000000004	-115.21162199999999	Diva Beauty - A Threading Boutique	NV	4300 Meadows Ln Zone D, Upper Level Westside Las Vegas, NV 89107	3.912023005428146	0.6931471805599453	0.0	0	2	0	1	0	0	0.0	0.0	0.0	0.0	0.0	0.0	0.0	0.0	1.0	0.0	0.0	0.0	0.0	0.0	0.0	0.0	0.0	0.0	1.0	0.0	0.0	0.0	0.0	0.0	0.0	0.0	0.0	0	0	0	0	0
Pittsburgh	4.341946208126671	24.037220484304832	39.091495166632086	40.454132	-79.95183	Pizza Pronto	PA	4611 Centre Ave Oakland Pittsburgh, PA 15213	1.6094379124341003	0.0	0.0	0	2	0	1	0	0	1.0	0.0	0.0	1.0	0.0	0.0	0.0	0.0	1.0	0.0	0.0	0.0	0.0	0.0	1.0	0.0	0.0	0.0	0.0	0.0	0.0	0.0	0.0	0.0	0.0	0.0	0.0	1	0	0	0	1
Las Vegas	2.611622157209917	6.722270343328148	5.861647328214625	36.1476155	-115.1193196	Eric Palacios & Associates	NV	2050 S Eastern Ave Downtown Las Vegas, NV 89104	2.1972245773362196	0.0	0.0	0	2	0	1	0	0	0.0	0.0	0.0	0.0	0.0	0.0	0.0	0.0	0.0	0.0	0.0	0.0	0.0	0.0	0.0	0.0	0.0	0.0	0.0	0.0	0.0	0.0	0.0	0.0	0.0	0.0	0.0	0	0	0	0	0
Charlotte	13.39349346832081	26.400421394675693	14.063841212727251	35.31274260000001	-80.74322690000001	South Beach Tanning Company	NC	9335 N Tryon St University City Charlotte, NC 28262	1.3862943611198906	0.6931471805599453	0.0	0	2	0	1	0	0	0.0	0.0	0.0	0.0	0.0	0.0	0.0	0.0	1.0	0.0	0.0	0.0	0.0	0.0	0.0	0.0	0.0	0.0	0.0	0.0	0.0	0.0	0.0	0.0	0.0	0.0	0.0	0	0	0	0	0
Phoenix	16.23070186276305	15.114833949161834	18.79685170486986	33.306489	-112.052879	Legend Cleaners	AZ	1442 E Chandler Blvd Ste 113 Phoenix, AZ 85048	3.6109179126442243	1.3862943611198906	0.0	0	2	0	1	1	0	0.0	0.0	0.0	0.0	0.0	0.0	0.0	0.0	1.0	0.0	0.0	0.0	0.0	0.0	0.0	0.0	0.0	0.0	1.0	0.0	0.0	0.0	0.0	0.0	0.0	0.0	0.0	0	0	0	0	0
Las Vegas	7.822463940215164	6.992787314944367	3.343569244664134	36.125254	-115.20555	Hair Zone	NV	4725 Spring Mountain Rd #H Chinatown Las Vegas, NV 89103	2.302585092994046	0.6931471805599453	0.0	0	2	0	1	0	0	0.0	0.0	0.0	0.0	0.0	0.0	0.0	1.0	1.0	0.0	0.0	0.0	0.0	0.0	0.0	0.0	0.0	0.0	0.0	0.0	0.0	0.0	0.0	0.0	0.0	0.0	0.0	0	0	0	0	0
Las Vegas	7.393453682277698	1.7043554458337828	4.136449941699125	36.100741299999996	-115.12818419999999	DISTRCT	NV	1775 E Tropicana Blvd Ste 15 Eastside Las Vegas, NV 89119	6.030685260261263	2.5649493574615367	0.0	0	2	0	1	1	0	0.0	0.0	0.0	0.0	0.0	0.0	0.0	1.0	1.0	0.0	0.0	0.0	0.0	0.0	0.0	0.0	0.0	0.0	1.0	0.0	0.0	0.0	0.0	0.0	0.0	0.0	0.0	0	0	0	0	0
Charlotte	17.31745335027258	33.76900934665466	19.179993562785846	35.371221999999996	-80.783199	PostNet	NC	5806 Prosperity Church Rd Ste A2 Highland Creek Charlotte, NC 28269	0.0	0.6931471805599453	0.0	0	2	0	1	0	0	0.0	0.0	0.0	0.0	0.0	0.0	0.0	0.0	1.0	0.0	0.0	0.0	0.0	0.0	0.0	0.0	0.0	0.0	0.0	0.0	0.0	0.0	0.0	0.0	0.0	0.0	0.0	0	0	0	0	0
Las Vegas	0.7553344186655233	8.82688766836627	6.48931021758175	36.1692708	-115.14355690000001	McDonald's	NV	301 Fremont St Downtown Las Vegas, NV 89101	4.248495242049359	1.3862943611198906	0.0	0	2	0	1	1	0	0.0	0.0	0.0	1.0	0.0	0.0	0.0	1.0	1.0	0.0	0.0	0.0	0.0	0.0	1.0	0.0	0.0	0.0	0.0	0.0	0.0	0.0	0.0	0.0	0.0	0.0	0.0	1	0	1	0	0
Las Vegas	9.870285989324438	11.514115529665688	7.752977704674988	36.15201079999999	-115.2437024	Fajitas House	NV	1745 S Rainbow Blvd Westside Las Vegas, NV 89146	2.4849066497880004	1.6094379124341003	0.0	2	2	0	1	0	0	0.0	0.0	0.0	1.0	1.0	1.0	1.0	1.0	1.0	1.0	0.0	0.0	0.0	0.0	1.0	0.0	0.0	0.0	0.0	0.0	0.0	0.0	0.0	0.0	0.0	0.0	0.0	1	0	0	0	0
Las Vegas	5.883916946604172	2.9888132917738646	1.7741142495077349	36.115547	-115.15090490000001	Holiday Inn Hotel Las Vegas	NV	4055 Palos Verdes St Eastside Las Vegas, NV 89119	3.044522437723423	0.0	0.0	0	2	0	1	0	0	0.0	0.0	0.0	0.0	0.0	0.0	0.0	0.0	1.0	0.0	0.0	0.0	0.0	0.0	0.0	0.0	0.0	0.0	0.0	0.0	0.0	0.0	0.0	0.0	0.0	0.0	0.0	0	0	0	0	0
Edinburgh	0.7285908963107575	10.468488318251207	1.342808940118369	55.9595976	-3.1911088	Mansfield Traquair Centre	EDH	15 Manfield Pl New Town Edinburgh EH3 6BB	3.044522437723423	1.9459101490553132	0.0	0	2	0	1	0	0	0.0	0.0	0.0	0.0	0.0	0.0	0.0	0.0	1.0	0.0	0.0	0.0	0.0	0.0	0.0	0.0	0.0	0.0	0.0	0.0	0.0	0.0	0.0	0.0	0.0	0.0	0.0	0	0	0	0	0
Las Vegas	6.363920787735262	4.2642399203528605	0.4265778548900422	36.118399	-115.172945	P.J. Clarke's New York Chophouse	NV	The Forum Shops At Caesars Palace 3500 S Las Vegas Blvd The Strip Las Vegas, NV 89109	6.400257445308821	4.465908118654584	0.6931471805599453	0	1	0	1	2	0	0.0	0.0	0.0	1.0	1.0	0.0	1.0	0.0	1.0	1.0	0.0	0.0	0.0	0.0	1.0	0.0	0.0	1.0	0.0	1.0	0.0	0.0	0.0	0.0	0.0	0.0	0.0	1	0	0	0	0
Las Vegas	0.6530466710571587	8.89831941763082	6.612047463196305	36.1699325896674	-115.141962378668	Cous Cous Restaurant	NV	Downtown Las Vegas, NV	1.9459101490553132	0.6931471805599453	0.0	0	2	0	1	0	0	1.0	0.0	0.0	0.0	0.0	0.0	0.0	1.0	1.0	0.0	0.0	0.0	0.0	0.0	1.0	0.0	0.0	0.0	0.0	0.0	0.0	0.0	0.0	0.0	0.0	0.0	0.0	1	0	0	0	0
Pittsburgh	5.623522378347731	25.95129367339879	40.8959030933728	40.479051399999996	-79.95548459999999	That's Amore	PA	5123 Butler St Lawrenceville Pittsburgh, PA 15201	2.302585092994046	1.0986122886681098	0.0	2	2	0	1	0	0	1.0	0.0	0.0	1.0	1.0	0.0	0.0	1.0	1.0	0.0	0.0	0.0	0.0	0.0	1.0	0.0	0.0	0.0	0.0	0.0	0.0	0.0	0.0	0.0	0.0	0.0	0.0	1	0	0	0	1
Phoenix	23.90529394676959	27.035369183059206	21.442379373628228	33.6649191892753	-112.112089173498	Grace Fighting Systems Training Center	AZ	2501 W Behrend Dr Ste 33 Phoenix, AZ 85027	0.0	0.0	0.0	0	2	0	1	0	0	0.0	0.0	0.0	0.0	0.0	0.0	0.0	1.0	0.0	0.0	0.0	0.0	0.0	0.0	0.0	0.0	0.0	0.0	0.0	0.0	0.0	0.0	0.0	0.0	0.0	0.0	0.0	0	0	0	0	0
Phoenix	10.882935799887147	12.708779421417201	8.095632867320575	33.547101	-112.04711499999999	Bank of America	AZ	7579 N 16th St Phoenix, AZ 85020	4.564348191467836	1.6094379124341003	0.0	0	2	0	1	0	0	0.0	0.0	0.0	0.0	0.0	0.0	0.0	0.0	0.0	0.0	0.0	0.0	0.0	0.0	0.0	0.0	0.0	0.0	0.0	0.0	0.0	0.0	0.0	0.0	0.0	0.0	0.0	0	0	0	0	0
Las Vegas	17.8507216233337	18.84194031586076	15.390100039808665	36.1569658	-115.3335939	Panda Express	NV	11011 W Charleston Blvd South Summerlin Las Vegas, NV 89135	4.477336814478207	1.9459101490553132	0.0	1	2	0	1	0	0	0.0	0.0	0.0	1.0	0.0	1.0	0.0	1.0	1.0	0.0	0.0	0.0	0.0	0.0	1.0	0.0	0.0	0.0	0.0	1.0	0.0	0.0	0.0	0.0	0.0	0.0	0.0	1	0	0	0	0
Phoenix	5.3200273076306255	1.5221916484113158	5.355425114368775	33.4484198793775	-112.01741450370501	Post Box eXpress	AZ	2990 E Washington St Phoenix, AZ 85034	0.0	0.0	0.0	0	2	0	1	0	0	0.0	0.0	0.0	0.0	0.0	0.0	0.0	0.0	1.0	0.0	0.0	0.0	0.0	0.0	0.0	0.0	0.0	0.0	0.0	0.0	0.0	0.0	0.0	0.0	0.0	0.0	0.0	0	0	0	0	0
Charlotte	14.88083619567452	41.20961622861564	18.324918532866594	35.3250995	-80.94634659999998	Coppa Coffee and Tea Cafe	NC	3611 Mt. Holly-Huntersville Rd Ste 201 Charlotte, NC 28216	2.3978952727983707	0.6931471805599453	0.0	0	2	0	0	0	0	0.0	1.0	0.0	0.0	0.0	0.0	0.0	0.0	1.0	0.0	0.0	0.0	0.0	0.0	0.0	0.0	0.0	0.0	0.0	0.0	0.0	0.0	0.0	0.0	0.0	0.0	0.0	0	0	0	0	0
Charlotte	14.23204149533663	38.157237047308236	17.373193659340025	35.34507369995121	-80.8871383666992	Fu Shing II	NC	8134 Mt Holly-Huntersville Rd Charlotte, NC 28216	3.1780538303479458	1.6094379124341003	0.0	0	2	0	1	0	0	0.0	0.0	0.0	0.0	0.0	0.0	1.0	1.0	1.0	0.0	0.0	0.0	0.0	0.0	1.0	0.0	0.0	0.0	0.0	0.0	0.0	0.0	0.0	0.0	0.0	0.0	0.0	1	0	0	0	0
Las Vegas	9.10251876553185	8.612610464683065	5.068425407014022	36.1280756	-115.22456640000001	Karaoke Q Studio	NV	3400 S Jones Blvd Ste 11 Las Vegas, NV 89146	7.181591944611865	5.123963979403259	0.6931471805599453	0	0	0	0	1	0	0.0	0.0	0.0	1.0	1.0	0.0	1.0	0.0	1.0	1.0	1.0	1.0	0.0	0.0	1.0	0.0	0.0	0.0	1.0	0.0	0.0	0.0	1.0	0.0	0.0	0.0	0.0	0	0	0	1	0
Phoenix	10.217359131900185	6.947176201266714	8.422462304543123	33.4945794	-111.97721229999999	Arcadia Flowers & Gifts	AZ	4835 E Indian School Rd Phoenix, AZ 85018	0.0	0.6931471805599453	0.0	0	2	0	1	0	0	0.0	0.0	0.0	0.0	0.0	0.0	0.0	0.0	1.0	0.0	0.0	0.0	0.0	0.0	0.0	0.0	0.0	0.0	0.0	0.0	0.0	0.0	0.0	0.0	0.0	0.0	0.0	0	0	0	0	0
Edinburgh	1.2578183780790735	9.746365859220463	0.3717271512600845	55.946729000000005	-3.2047065	Jasmine	EDH	32 Grindlay Street Old Town Edinburgh EH3 9AP	1.791759469228055	0.0	0.0	0	2	0	1	0	0	0.0	0.0	0.0	1.0	0.0	0.0	0.0	0.0	1.0	1.0	0.0	0.0	0.0	0.0	0.0	0.0	0.0	0.0	0.0	0.0	0.0	0.0	0.0	0.0	0.0	0.0	0.0	1	0	0	0	0
Las Vegas	7.996530092706687	3.8264386811134403	6.457688670188177	36.100689700000004	-115.10110149999998	Mexicali Raspados	NV	4865 S Pecos Rd Eastside Las Vegas, NV 89121	2.9444389791664403	1.0986122886681098	0.0	0	2	0	1	0	0	0.0	0.0	0.0	1.0	1.0	0.0	0.0	1.0	1.0	0.0	0.0	0.0	0.0	0.0	1.0	0.0	0.0	0.0	0.0	0.0	0.0	0.0	0.0	0.0	0.0	0.0	0.0	1	0	0	0	0
Phoenix	14.768020671120167	18.870854413110468	12.57224618105905	33.57938920000001	-112.1195513	InnPlace Hotel	AZ	10220 N Metro Pkwy E Phoenix, AZ 85051	2.1972245773362196	1.0986122886681098	0.0	0	2	0	0	0	0	0.0	0.0	0.0	0.0	0.0	0.0	0.0	0.0	1.0	0.0	0.0	0.0	0.0	0.0	0.0	0.0	0.0	0.0	0.0	0.0	0.0	0.0	0.0	0.0	0.0	0.0	0.0	0	0	0	0	0
Las Vegas	9.944701581762915	14.208370415164671	10.36720703546503	36.187591	-115.24321599999999	Las Vegas Mini Gran Prix Family Fun Center	NV	1401 N Rainbow Blvd Las Vegas, NV 89108	6.480044561926653	3.6888794541139363	0.0	0	2	0	1	0	0	0.0	0.0	0.0	0.0	0.0	0.0	0.0	1.0	1.0	0.0	0.0	0.0	0.0	0.0	0.0	0.0	0.0	0.0	0.0	0.0	0.0	0.0	0.0	0.0	0.0	0.0	0.0	0	0	0	0	0
Edinburgh	2.0012668542867913	9.010968473512683	1.1403149655634408	55.945403299999995	-3.2170859	Chiang Mai	EDH	15 Dalry Road West End Edinburgh EH11 2BQ	0.0	0.0	0.0	0	2	0	1	0	0	0.0	0.0	0.0	0.0	0.0	0.0	0.0	1.0	0.0	0.0	0.0	0.0	0.0	0.0	0.0	0.0	0.0	0.0	0.0	0.0	0.0	0.0	0.0	0.0	0.0	0.0	0.0	1	0	0	0	0
Pittsburgh	0.1655344553293304	20.503862694637384	41.87981835384974	40.4425343	-79.99870200000001	Arby's	PA	808 Liberty Ave Downtown Pittsburgh, PA 15222	3.044522437723423	1.0986122886681098	0.0	0	2	0	1	1	0	0.0	0.0	0.0	1.0	1.0	0.0	0.0	1.0	1.0	0.0	0.0	0.0	0.0	0.0	1.0	0.0	0.0	0.0	0.0	0.0	0.0	0.0	0.0	0.0	0.0	0.0	0.0	1	1	1	0	0
Pittsburgh	0.447887284432982	20.686146437134173	41.621861570292324	40.442582	-79.995221	Au Bon Pain	PA	707 Grant St Downtown Pittsburgh, PA 15219	3.5553480614894135	0.6931471805599453	0.0	0	2	0	1	1	0	1.0	0.0	0.0	1.0	0.0	0.0	0.0	1.0	1.0	0.0	0.0	0.0	0.0	0.0	1.0	0.0	0.0	0.0	0.0	0.0	0.0	0.0	0.0	0.0	0.0	0.0	0.0	1	1	0	0	0
Las Vegas	6.529787100108313	11.596345146643632	7.89008604331875	36.1799564	-115.20642749999999	Dulce Donuts	NV	701 N Decatur Blvd Las Vegas, NV 89107	3.871201010907891	2.3978952727983707	0.0	0	2	0	1	0	0	0.0	0.0	0.0	0.0	0.0	0.0	0.0	0.0	1.0	0.0	0.0	0.0	0.0	0.0	0.0	0.0	0.0	0.0	1.0	0.0	0.0	0.0	0.0	0.0	0.0	0.0	0.0	0	0	0	0	0
Las Vegas	18.900473510128087	13.405993102174946	12.626167810836058	36.0420451	-115.2781154	Sunshine Pro Cleaners	NV	8090 S Durango Dr Ste 1 Southwest Las Vegas, NV 89113	0.0	0.0	0.0	0	2	0	1	0	0	0.0	0.0	0.0	0.0	0.0	0.0	0.0	0.0	1.0	0.0	0.0	0.0	0.0	0.0	0.0	0.0	0.0	0.0	0.0	0.0	0.0	0.0	0.0	0.0	0.0	0.0	0.0	0	0	0	0	0
Phoenix	4.716993939548978	6.580071823200552	2.1458591269042917	33.4870804	-112.04634159999999	Tailwinds Pet Resort	AZ	1625 E Osborn Rd Phoenix, AZ 85016	5.123963979403259	1.0986122886681098	0.0	0	2	0	1	0	0	0.0	0.0	0.0	0.0	0.0	0.0	0.0	0.0	0.0	0.0	0.0	0.0	0.0	0.0	0.0	0.0	0.0	0.0	0.0	0.0	0.0	0.0	0.0	0.0	0.0	0.0	0.0	0	0	0	0	0
Las Vegas	9.796776173746627	7.132667114351723	9.775704527357645	36.1010195	-115.0634182	Rose's Dog Grooming	NV	5020 E Tropicana Ave Eastside Las Vegas, NV 89122	0.0	0.0	0.0	0	2	0	1	0	0	0.0	0.0	0.0	0.0	0.0	0.0	0.0	0.0	0.0	0.0	0.0	0.0	0.0	0.0	0.0	0.0	0.0	0.0	0.0	0.0	0.0	0.0	0.0	0.0	0.0	0.0	0.0	0	0	0	0	0
Las Vegas	7.354918871974702	1.3973030409201395	3.6512871911492377	36.1008286	-115.1340369	Smart & Final	NV	1435 E Tropicana Ave Southeast Las Vegas, NV 89119	4.454347296253507	0.0	0.0	0	2	0	1	0	0	0.0	0.0	0.0	0.0	0.0	0.0	0.0	0.0	1.0	0.0	0.0	0.0	0.0	0.0	0.0	0.0	0.0	0.0	1.0	0.0	0.0	0.0	0.0	0.0	0.0	0.0	0.0	0	0	0	0	0
Pittsburgh	1.3762071089775334	19.0063751236829	41.922465179670525	40.430564000000004	-80.0072443	Redbeard's Bar & Grill	PA	201 Shiloh St Mt. Washington Pittsburgh, PA 15211	5.393627546352362	2.5649493574615367	0.0	0	1	0	0	1	1	0.0	1.0	0.0	1.0	1.0	1.0	1.0	0.0	1.0	0.0	1.0	0.0	0.0	0.0	1.0	0.0	1.0	0.0	0.0	0.0	0.0	0.0	0.0	0.0	0.0	0.0	0.0	1	0	0	1	0
Las Vegas	5.463602217262102	4.998141243376278	1.383347088781907	36.127494700447	-115.17167058345801	Oakley	NV	3200 Las Vegas Blvd S The Strip Las Vegas, NV 89106	2.70805020110221	0.6931471805599453	0.0	0	2	0	1	2	0	0.0	0.0	0.0	0.0	0.0	0.0	0.0	0.0	1.0	0.0	0.0	0.0	0.0	0.0	0.0	0.0	0.0	0.0	0.0	1.0	0.0	0.0	0.0	0.0	0.0	0.0	0.0	0	0	0	0	0
Edinburgh	1.2147304519613176	9.566610742325034	1.1350061185645537	55.958188899999996	-3.2056080000000002	The Antiquary	EDH	72-78 St Stephen Street Stockbridge Edinburgh EH3 5AQ	3.4011973816621555	0.6931471805599453	0.0	0	1	0	1	1	0	0.0	0.0	0.0	1.0	0.0	0.0	0.0	0.0	1.0	0.0	0.0	0.0	0.0	0.0	0.0	0.0	0.0	0.0	0.0	0.0	0.0	0.0	0.0	0.0	0.0	0.0	0.0	0	0	0	1	0
Las Vegas	10.316938742033754	18.43332685752249	16.894444758270613	36.2479722	-115.07899640000001	Copart Salvage Auto Auctions	NV	4810 N Lamb Boulevard Las Vegas, NV 89115	2.302585092994046	1.0986122886681098	0.0	0	2	0	1	0	0	0.0	0.0	0.0	0.0	0.0	0.0	0.0	0.0	0.0	0.0	0.0	0.0	0.0	0.0	0.0	0.0	0.0	0.0	0.0	0.0	0.0	0.0	0.0	0.0	0.0	0.0	0.0	0	0	0	0	0
Pittsburgh	2.3646250906648523	20.38866304175194	39.65181531016564	40.4283922157734	-79.9787491187453	Carmella's Plates & Pints	PA	1908 E Carson St South Side Pittsburgh, PA 15203	4.248495242049359	1.6094379124341003	0.0	0	1	0	1	1	0	0.0	0.0	0.0	1.0	0.0	0.0	0.0	0.0	1.0	0.0	1.0	0.0	0.0	0.0	0.0	0.0	1.0	0.0	0.0	0.0	0.0	0.0	0.0	0.0	0.0	0.0	1.0	0	0	0	1	0
Las Vegas	16.8066111290345	8.405701756607765	11.917437467839425	36.0162554	-115.11873290000001	Bistro95Ten & Lounge	NV	9510 S Eastern Ave Southeast Las Vegas, NV 89123	1.6094379124341003	1.3862943611198906	0.0	2	1	0	1	1	1	1.0	1.0	0.0	1.0	1.0	0.0	1.0	1.0	1.0	1.0	1.0	0.0	0.0	0.0	0.0	0.0	0.0	0.0	0.0	0.0	0.0	1.0	1.0	0.0	0.0	0.0	1.0	1	0	0	1	0
Las Vegas	14.5761318829608	6.562312318681121	8.224872296997454	36.041726700000005	-115.18392240000001	Las Vegas Foodie Fest - Silverton Casino	NV	3333 Blue Diamond Rd Southwest Las Vegas, NV 89139	6.4692503167957724	4.174387269895637	1.791759469228055	0	2	0	1	1	0	0.0	0.0	0.0	0.0	0.0	0.0	0.0	1.0	1.0	0.0	0.0	0.0	0.0	0.0	0.0	0.0	0.0	0.0	1.0	0.0	0.0	0.0	0.0	0.0	0.0	0.0	0.0	0	0	0	0	0
Edinburgh	5.010883208978998	6.946968402623084	4.137377988265829	55.9325914	-3.2595118999999997	The Sten House Takeaway	EDH	12 Stenhouse Cross Edinburgh EH11 3JU	0.0	0.0	0.0	0	2	0	1	0	0	0.0	0.0	0.0	0.0	0.0	0.0	0.0	0.0	0.0	0.0	0.0	0.0	0.0	0.0	0.0	0.0	0.0	0.0	0.0	0.0	0.0	0.0	0.0	0.0	0.0	0.0	0.0	1	0	1	0	0
Pittsburgh	11.230161738079241	30.841445589359587	36.748569740234366	40.48833508461	-79.8828375588711	Donatos Fox Chapel	PA	46 Fox Chapel Rd Pittsburgh, PA 15238	3.9318256327243257	1.6094379124341003	0.0	0	1	0	1	2	0	0.0	0.0	0.0	1.0	1.0	1.0	1.0	0.0	1.0	1.0	0.0	0.0	0.0	0.0	1.0	0.0	0.0	0.0	1.0	0.0	0.0	0.0	0.0	0.0	0.0	0.0	0.0	1	0	0	0	0
Las Vegas	16.24115345413297	13.722388829912905	11.263635907752645	36.0963464223962	-115.293548882876	Mollys Bar	NV	Fort Apache & Tropicana Spring Valley Las Vegas, NV 89148	2.0794415416798357	0.6931471805599453	0.0	0	1	0	1	0	0	0.0	0.0	0.0	1.0	1.0	0.0	0.0	0.0	1.0	0.0	1.0	0.0	0.0	0.0	0.0	1.0	0.0	0.0	0.0	0.0	0.0	0.0	0.0	0.0	0.0	0.0	0.0	0	0	0	1	0
Pittsburgh	1.7188083624464041	18.74089154038947	42.80846232413164	40.433155434025295	-80.01720428466798	Mount Washington	PA	Mt. Washington Pittsburgh, PA 15211	6.29156913955832	1.791759469228055	0.0	0	2	0	1	0	0	0.0	0.0	0.0	0.0	0.0	0.0	0.0	1.0	0.0	0.0	0.0	0.0	0.0	0.0	0.0	0.0	0.0	0.0	0.0	0.0	0.0	0.0	0.0	0.0	0.0	0.0	0.0	0	0	0	0	0
Las Vegas	11.123976932721892	11.933823847419651	8.31876034943953	36.1439493298531	-115.255877226591	Southwest Management Group	NV	7560 W Sahara Ave Ste 107 Westside Las Vegas, NV 89117	0.0	0.6931471805599453	0.0	0	2	0	1	0	0	0.0	0.0	0.0	0.0	0.0	0.0	0.0	0.0	1.0	0.0	0.0	0.0	0.0	0.0	0.0	0.0	0.0	0.0	0.0	0.0	0.0	0.0	0.0	0.0	0.0	0.0	0.0	0	0	0	0	0
Madison	9.908855987396327	16.925874262350153	9.07873010975477	43.05529798932421	-89.511374399644	Nordstrom Rack	WI	7349 West Towne Way West Madison, WI 53719	3.6109179126442243	0.6931471805599453	0.0	0	2	0	1	1	0	0.0	0.0	0.0	0.0	0.0	0.0	0.0	0.0	1.0	0.0	0.0	0.0	0.0	0.0	0.0	0.0	0.0	0.0	0.0	0.0	0.0	0.0	0.0	0.0	0.0	0.0	0.0	0	0	0	0	0
Phoenix	14.555745547227778	18.836649840285055	12.438925894999123	33.5759675	-112.1248695	Dillard's Clearance Center	AZ	10002 N Metro Pkwy West Phoenix, AZ 85051	5.081404364984463	3.295836866004329	0.0	0	2	0	1	0	0	0.0	0.0	0.0	0.0	0.0	0.0	0.0	0.0	1.0	0.0	0.0	0.0	0.0	0.0	0.0	0.0	0.0	0.0	1.0	0.0	0.0	0.0	0.0	0.0	0.0	0.0	0.0	0	0	0	0	0
Phoenix	8.213545187830745	10.12817544414625	5.412904363334701	33.5222908	-112.0477898	Vapor Etc	AZ	5812 N 16th St Phoenix, AZ 85016	3.091042453358316	1.6094379124341003	0.6931471805599453	0	2	0	1	1	0	0.0	0.0	0.0	1.0	0.0	0.0	0.0	0.0	1.0	0.0	0.0	0.0	0.0	0.0	0.0	0.0	0.0	0.0	1.0	0.0	0.0	0.0	0.0	0.0	0.0	0.0	1.0	0	0	0	0	0
Charlotte	18.639833132470283	38.42504433101995	18.920846361262825	35.103639	-80.985598	McDonald's	NC	14110 Rivergate Pkwy Steele Creek Charlotte, NC 28273	2.833213344056216	1.3862943611198906	0.0	0	2	0	1	0	0	0.0	0.0	1.0	1.0	0.0	0.0	0.0	1.0	1.0	0.0	0.0	0.0	0.0	0.0	1.0	0.0	0.0	0.0	0.0	0.0	0.0	0.0	0.0	0.0	0.0	0.0	0.0	1	0	1	0	0
Phoenix	18.445198563722396	14.769732562626855	20.434949478106944	33.306638	-111.97755900000001	Adelaide	AZ	4910 E Chandler Blvd Ste 104 Phoenix, AZ 85048	1.3862943611198906	0.0	0.0	0	2	0	1	1	0	0.0	0.0	0.0	0.0	0.0	0.0	0.0	0.0	1.0	0.0	0.0	0.0	0.0	0.0	0.0	0.0	0.0	0.0	1.0	0.0	0.0	0.0	0.0	0.0	0.0	0.0	0.0	0	0	0	0	0
Edinburgh	0.14769935352698824	10.5356883598216	0.8102652156513324	55.9536723	-3.190509	Guildford Arms	EDH	1-5 W Register Street New Town Edinburgh EH2 2AA	4.770684624465665	2.0794415416798357	0.0	1	1	0	0	1	0	0.0	0.0	0.0	1.0	1.0	0.0	1.0	0.0	1.0	1.0	0.0	0.0	0.0	0.0	0.0	0.0	0.0	0.0	0.0	0.0	0.0	0.0	0.0	0.0	0.0	0.0	0.0	1	0	0	1	0
Charlotte	0.560179209244933	27.788221085870617	3.982127308545924	35.227109999999996	-80.84351	Kilwin's Chocolates	NC	John J Delaney Dr Uptown Charlotte, NC 28263	2.833213344056216	1.3862943611198906	0.0	0	2	0	1	1	0	0.0	0.0	0.0	0.0	0.0	0.0	0.0	0.0	1.0	0.0	0.0	0.0	0.0	0.0	0.0	0.0	0.0	0.0	0.0	0.0	0.0	0.0	0.0	0.0	0.0	0.0	0.0	0	0	0	0	0
Phoenix	9.291895708630962	7.401715316610394	7.125052712210289	33.503374	-111.99581200000002	Arcadia Dry Cleaners	AZ	4522 N 40th St Phoenix, AZ 85018	2.0794415416798357	0.0	0.0	0	2	0	1	0	0	0.0	0.0	0.0	0.0	0.0	0.0	0.0	0.0	1.0	0.0	0.0	0.0	0.0	0.0	0.0	0.0	0.0	0.0	0.0	0.0	0.0	0.0	0.0	0.0	0.0	0.0	0.0	0	0	0	0	0
Las Vegas	16.924450676805908	15.737469260103653	12.822830047434365	36.116543881381396	-115.31301498413099	Signature Nails & Spa	NV	10120 W Flamingo Rd Ste 3 Spring Valley Las Vegas, NV 89147	3.6888794541139363	2.3978952727983707	0.0	0	2	0	1	1	0	0.0	0.0	0.0	0.0	0.0	0.0	0.0	0.0	1.0	0.0	0.0	0.0	0.0	0.0	0.0	0.0	0.0	0.0	1.0	0.0	0.0	0.0	0.0	0.0	0.0	0.0	0.0	0	0	0	0	0
Charlotte	11.784487947666022	23.693784711404593	9.268874323537458	35.1171312	-80.824652	Cvs Pharmacy	NC	4100 Carmel Rd Charlotte, NC 28226	2.3978952727983707	0.6931471805599453	0.0	0	2	0	1	1	0	0.0	0.0	0.0	0.0	0.0	0.0	0.0	0.0	1.0	0.0	0.0	0.0	0.0	0.0	0.0	0.0	0.0	0.0	0.0	0.0	0.0	0.0	0.0	0.0	0.0	0.0	0.0	0	0	0	0	0
Las Vegas	13.676478111375546	20.434499385780757	16.78301528037537	36.254519	-115.242815	Varadero Cuban Restaurant	NV	5081 N Rainbow Blvd Ste 100 Northwest Las Vegas, NV 89130	2.8903717578961645	1.791759469228055	0.0	0	0	0	1	1	0	0.0	0.0	0.0	1.0	1.0	0.0	1.0	1.0	1.0	0.0	0.0	0.0	0.0	0.0	1.0	0.0	0.0	0.0	1.0	0.0	0.0	0.0	0.0	0.0	0.0	0.0	0.0	1	0	0	0	0
Phoenix	5.8810665346512625	7.489736971522378	8.57627732301164	33.39868	-112.0736674	Las Glorias Restaurant	AZ	5220 S Central Avenue Phoenix, AZ 85040	2.8903717578961645	1.3862943611198906	0.0	0	0	0	1	1	0	0.0	0.0	0.0	1.0	1.0	0.0	1.0	1.0	1.0	1.0	0.0	0.0	0.0	0.0	1.0	0.0	0.0	0.0	1.0	0.0	0.0	0.0	0.0	0.0	0.0	0.0	0.0	1	0	0	0	0
Phoenix	10.80682347839993	13.264142204830641	8.082259988800269	33.54844	-112.06063600000002	American Professional Moving	AZ	1001 E Belmont Ave Phoenix, AZ 85020	0.0	0.0	0.0	0	2	0	1	0	0	0.0	0.0	0.0	0.0	0.0	0.0	0.0	0.0	1.0	0.0	0.0	0.0	0.0	0.0	0.0	0.0	1.0	0.0	0.0	0.0	0.0	0.0	0.0	0.0	0.0	0.0	0.0	0	0	0	0	0
Edinburgh	2.80937761254292	11.716056491320591	3.5760715280014734	55.977052799999996	-3.1733356	La Garrigue Bistro	EDH	88 Commercial Street Leith Edinburgh EH6 6LX	0.0	0.6931471805599453	0.0	0	1	0	1	1	0	0.0	1.0	0.0	1.0	0.0	0.0	1.0	1.0	1.0	1.0	0.0	0.0	0.0	0.0	1.0	0.0	1.0	0.0	1.0	0.0	0.0	0.0	0.0	0.0	0.0	0.0	0.0	1	0	0	0	0
Charlotte	17.21872287525435	25.983725265280974	14.948589880054861	35.067296999999996	-80.841053	Global Restaurant	NC	3520 Toringdon Way Ballantyne Charlotte, NC 28277	3.784189633918261	2.1972245773362196	0.0	2	1	1	1	2	0	0.0	1.0	0.0	1.0	0.0	0.0	1.0	0.0	1.0	1.0	1.0	0.0	0.0	0.0	1.0	0.0	0.0	0.0	1.0	1.0	0.0	0.0	0.0	0.0	0.0	0.0	1.0	1	0	0	0	0
Pittsburgh	5.521169140183802	25.438044439728287	39.10730025485634	40.4648716	-79.94274370000001	National City Bank of Pennsylvania	PA	5100 Penn Ave Bloomfield Pittsburgh, PA 15224	0.0	0.0	0.0	0	2	0	1	0	0	0.0	0.0	0.0	0.0	0.0	0.0	0.0	0.0	0.0	0.0	0.0	0.0	0.0	0.0	0.0	0.0	0.0	0.0	0.0	0.0	0.0	0.0	0.0	0.0	0.0	0.0	0.0	0	0	0	0	0
Pittsburgh	7.89528072463537	12.686563349328623	42.41420641957153	40.3777216	-80.0407084	Hitchhiker Brewing Company	PA	190 Castle Shannon Blvd Pittsburgh, PA 15228	4.174387269895637	2.0794415416798357	0.0	0	2	0	1	1	0	0.0	0.0	0.0	0.0	0.0	0.0	0.0	0.0	1.0	0.0	0.0	0.0	0.0	0.0	0.0	0.0	1.0	0.0	0.0	0.0	0.0	0.0	0.0	0.0	0.0	0.0	0.0	0	0	0	0	0
Las Vegas	7.7584518003294995	3.28376882985942	1.2287815273866793	36.1041893	-115.1732166	Lance Burton: Master Magician	NV	3770 Las Vegas Blvd S The Strip Las Vegas, NV 89109	0.0	0.0	0.0	0	2	0	1	0	0	0.0	0.0	0.0	0.0	0.0	0.0	0.0	1.0	0.0	0.0	0.0	0.0	0.0	0.0	0.0	0.0	0.0	0.0	0.0	0.0	0.0	0.0	0.0	0.0	0.0	0.0	0.0	0	0	0	0	0
Las Vegas	6.512455285639953	2.1048805821658574	3.0819014336583375	36.1084263	-115.1373615	Cafe Hookah	NV	4440 S Maryland Pkwy University Las Vegas, NV 89119	0.0	0.0	0.0	0	2	0	1	1	0	0.0	0.0	0.0	1.0	0.0	0.0	1.0	0.0	0.0	0.0	0.0	0.0	0.0	0.0	0.0	0.0	0.0	0.0	0.0	0.0	0.0	0.0	0.0	0.0	0.0	0.0	0.0	1	0	0	1	0
Las Vegas	15.455623926759968	10.24816037520051	9.18564567404048	36.0636284722776	-115.25052305056101	Pink Spot Vapors	NV	7290 Arroyo Crossing Pkwy Ste 100 Spring Valley Las Vegas, NV 89113	4.418840607796598	2.302585092994046	0.6931471805599453	0	2	0	1	1	0	0.0	0.0	0.0	0.0	0.0	0.0	0.0	0.0	1.0	0.0	0.0	0.0	0.0	0.0	0.0	0.0	0.0	0.0	1.0	0.0	0.0	0.0	0.0	0.0	0.0	0.0	0.0	0	0	0	0	0
Las Vegas	1.1095454476658828	9.01530026807117	7.388956156637083	36.169709600000004	-115.1236952	Ticketmaster	NV	Las Vegas, NV 89101	0.0	1.0986122886681098	0.0	0	2	0	1	0	0	0.0	0.0	0.0	0.0	0.0	0.0	0.0	0.0	0.0	0.0	0.0	0.0	0.0	0.0	0.0	0.0	0.0	0.0	0.0	0.0	0.0	0.0	0.0	0.0	0.0	0.0	0.0	0	0	0	0	0
Phoenix	11.772756663409057	16.006810419857505	9.597785567563577	33.553663	-112.10970800000001	Denny's Restaurant	AZ	2360 W Northern Ave Phoenix, AZ 85021	4.007333185232471	2.302585092994046	0.0	0	2	0	0	0	0	0.0	0.0	0.0	1.0	0.0	0.0	1.0	1.0	1.0	0.0	0.0	0.0	0.0	0.0	1.0	0.0	0.0	0.0	1.0	0.0	0.0	0.0	0.0	0.0	0.0	0.0	0.0	1	0	0	0	0
Charlotte	6.982208688409011	24.36902726040639	7.240290931077334	35.258158	-80.77779090000001	Lempira Restaurant	NC	140 Eastway Dr NoDa Charlotte, NC 28213	2.9444389791664403	0.0	0.0	0	1	0	1	1	0	0.0	0.0	0.0	1.0	1.0	0.0	1.0	1.0	1.0	0.0	0.0	0.0	0.0	0.0	1.0	0.0	0.0	0.0	1.0	0.0	0.0	0.0	0.0	0.0	0.0	0.0	0.0	1	0	0	0	0
Las Vegas	6.303504262842556	4.063837165168482	5.598647704496935	36.1147452	-115.1084176	Mac's Kitchen	NV	3055 E Flamingo Rd Eastside Las Vegas, NV 89121	0.0	0.6931471805599453	0.0	3	2	0	1	0	0	1.0	0.0	0.0	0.0	0.0	0.0	0.0	0.0	1.0	0.0	0.0	0.0	0.0	0.0	1.0	0.0	0.0	0.0	0.0	0.0	0.0	0.0	0.0	0.0	0.0	0.0	0.0	1	0	0	0	0
Las Vegas	17.3454320382058	8.786147839020574	12.030429848305973	36.0107847	-115.1340187	Choice Dental	NV	9850 S Maryland Pkwy Southeast Las Vegas, NV 89183	2.3978952727983707	0.6931471805599453	0.0	0	2	0	1	0	0	0.0	0.0	0.0	0.0	0.0	0.0	0.0	0.0	0.0	0.0	0.0	0.0	0.0	0.0	0.0	0.0	0.0	0.0	0.0	0.0	0.0	0.0	0.0	0.0	0.0	0.0	0.0	0	0	0	0	0
Las Vegas	7.178678746551486	3.3986827498232057	0.6704868929231014	36.109016290583604	-115.170724558941	Britney Spears Boutique	NV	Miracle Mile Shops The Strip Las Vegas, NV 89109	4.343805421853684	1.791759469228055	0.0	0	2	0	1	2	0	0.0	0.0	0.0	0.0	0.0	0.0	0.0	0.0	1.0	0.0	0.0	0.0	0.0	0.0	0.0	0.0	0.0	0.0	0.0	1.0	0.0	0.0	0.0	0.0	0.0	0.0	0.0	0	0	0	0	0
Phoenix	7.678834810908702	6.373916262306838	5.545111177660819	33.494823499999995	-112.0098712	Rio Wax Salon	AZ	3319 E Indian School Rd Phoenix, AZ 85018	3.9889840465642745	1.791759469228055	0.0	0	2	0	1	1	0	0.0	0.0	0.0	0.0	0.0	0.0	0.0	0.0	1.0	0.0	0.0	0.0	0.0	0.0	0.0	0.0	0.0	0.0	1.0	0.0	0.0	0.0	0.0	0.0	0.0	0.0	0.0	0	0	0	0	0
Las Vegas	6.049594592277018	9.428323927329604	5.638524965300165	36.158988799999996	-115.2020861	Little Caesars Pizza	NV	4559 W Charleston Blvd Westside Las Vegas, NV 89102	2.9444389791664403	0.0	0.0	0	2	0	1	0	0	1.0	0.0	0.0	0.0	0.0	0.0	0.0	1.0	1.0	0.0	0.0	0.0	0.0	0.0	1.0	0.0	0.0	0.0	0.0	0.0	0.0	0.0	0.0	0.0	0.0	0.0	0.0	1	0	0	0	1
Phoenix	7.195894798841437	12.371356497672924	5.568576155251644	33.50983	-112.108883	Filiberto's	AZ	2302 W Camelback Phoenix, AZ 85015	3.332204510175204	2.4849066497880004	0.0	0	2	0	1	0	0	0.0	0.0	0.0	1.0	0.0	0.0	0.0	1.0	1.0	0.0	0.0	0.0	0.0	0.0	1.0	0.0	0.0	0.0	1.0	0.0	0.0	0.0	0.0	0.0	0.0	0.0	0.0	1	0	0	0	0
Phoenix	14.355559059362488	10.182393246621883	16.1148876665622	33.348162	-111.9819	Edward Jones	AZ	4747 E Elliot Rd Ste 11 Phoenix, AZ 85044	2.0794415416798357	0.0	0.0	0	2	0	1	0	0	0.0	0.0	0.0	0.0	0.0	0.0	0.0	0.0	0.0	0.0	0.0	0.0	0.0	0.0	0.0	0.0	0.0	0.0	0.0	0.0	0.0	0.0	0.0	0.0	0.0	0.0	0.0	0	0	0	0	0
Pittsburgh	10.420067141152426	10.429220909800966	42.56609068736271	40.3560807	-80.0503427	Blue Horse Coffee	PA	1535 Washington Rd Pittsburgh, PA 15228	2.302585092994046	1.0986122886681098	0.0	0	2	0	0	1	0	0.0	1.0	0.0	0.0	0.0	0.0	0.0	0.0	1.0	0.0	0.0	0.0	0.0	0.0	0.0	0.0	0.0	0.0	1.0	0.0	0.0	0.0	0.0	0.0	0.0	0.0	0.0	0	0	0	0	0
Charlotte	13.430838253637493	37.183446105307446	14.73732014086542	35.164085299999996	-80.970169	Zaxby's	NC	9308 Robert Irwin Dr Steele Creek Charlotte, NC 28278	2.1972245773362196	0.6931471805599453	0.0	0	2	0	1	0	0	0.0	0.0	0.0	1.0	0.0	0.0	0.0	1.0	1.0	0.0	0.0	0.0	0.0	0.0	1.0	0.0	0.0	0.0	0.0	0.0	0.0	0.0	0.0	0.0	0.0	0.0	0.0	1	0	0	0	0
Las Vegas	5.593836967975791	5.1579695444729365	1.4469031778202768	36.127725299999994	-115.17441470000001	The Tumi Store	NV	3200 Las Vegas Boulevard S The Strip Las Vegas, NV 89109	3.1354942159291497	0.6931471805599453	0.0	0	2	0	1	3	0	0.0	0.0	0.0	0.0	0.0	0.0	0.0	0.0	1.0	0.0	0.0	0.0	0.0	0.0	0.0	0.0	0.0	0.0	0.0	1.0	0.0	0.0	0.0	0.0	0.0	0.0	0.0	0	0	0	0	0
Edinburgh	1.7796081548417677	8.995988663958236	1.512402834574787	55.959215350243	-3.2146995350967598	Franco's Chip Shop	EDH	5-7 Comely Bank Road Craigleith Stockbridge Edinburgh EH4 1DR	2.302585092994046	0.6931471805599453	0.0	0	2	0	1	0	0	1.0	0.0	0.0	0.0	0.0	0.0	0.0	1.0	1.0	0.0	0.0	0.0	0.0	0.0	1.0	0.0	0.0	0.0	0.0	0.0	0.0	0.0	0.0	0.0	0.0	0.0	0.0	1	0	1	0	0
Las Vegas	13.19748581156648	5.031561252463582	7.005396159086437	36.0519379	-115.1722398	Turnt Up Tours	NV	7582 South Las Vegas Blvd Ste 205 Southeast Las Vegas, NV 89109	0.0	1.0986122886681098	0.0	0	2	0	1	0	0	0.0	0.0	0.0	0.0	0.0	0.0	0.0	0.0	1.0	0.0	0.0	0.0	0.0	0.0	0.0	0.0	0.0	0.0	0.0	0.0	0.0	0.0	0.0	0.0	0.0	0.0	0.0	0	0	0	0	0
Las Vegas	3.2835595771553097	8.862268176395153	5.613952971533206	36.165638	-115.17205	Steven Rhodes, DDS	NV	501 S Rancho Dr Ste E29 Downtown Las Vegas, NV 89106	0.0	0.0	0.0	0	2	0	1	0	0	0.0	0.0	0.0	0.0	0.0	0.0	0.0	0.0	0.0	0.0	0.0	0.0	0.0	0.0	0.0	0.0	0.0	0.0	0.0	0.0	0.0	0.0	0.0	0.0	0.0	0.0	0.0	0	0	0	0	0
Las Vegas	9.832355783562633	3.7974038033112527	7.269009975476405	36.0833352	-115.0999753	HVAC Connection	NV	Southeast Las Vegas, NV 89120	0.0	0.0	0.0	0	2	0	1	0	0	0.0	0.0	0.0	0.0	0.0	0.0	0.0	0.0	1.0	0.0	0.0	0.0	0.0	0.0	0.0	0.0	0.0	0.0	0.0	0.0	0.0	0.0	0.0	0.0	0.0	0.0	0.0	0	0	0	0	0
Las Vegas	12.127255779900853	7.643375208709536	5.940478612032104	36.086174230465204	-115.226145709326	Sidney Wilson Personal Training	NV	5693 S Jones Blvd Ste 103 Spring Valley Las Vegas, NV 89118	3.091042453358316	0.6931471805599453	0.0	0	2	0	1	0	0	0.0	0.0	0.0	0.0	0.0	0.0	0.0	0.0	0.0	0.0	0.0	0.0	0.0	0.0	0.0	0.0	0.0	0.0	0.0	0.0	0.0	0.0	0.0	0.0	0.0	0.0	0.0	0	0	0	0	0
Las Vegas	1.6804967662722776	7.842056075876037	5.247813423935678	36.1598867	-115.15202240000002	Vexed By Design	NV	1017 1st St Downtown Las Vegas, NV 89101	2.1972245773362196	0.0	0.0	0	2	0	1	0	0	0.0	0.0	0.0	0.0	0.0	0.0	0.0	0.0	0.0	0.0	0.0	0.0	0.0	0.0	0.0	0.0	0.0	0.0	0.0	0.0	0.0	0.0	0.0	0.0	0.0	0.0	0.0	0	0	0	0	0
Las Vegas	16.302477861473015	14.150687921589256	11.549937181774727	36.1017704	-115.297827	Classic Tattoo	NV	4845 S Fort Apache Rd Ste G Spring Valley Las Vegas, NV 89147	3.784189633918261	1.9459101490553132	0.0	0	2	0	1	1	0	0.0	0.0	0.0	0.0	0.0	0.0	0.0	0.0	1.0	0.0	0.0	0.0	0.0	0.0	0.0	0.0	0.0	0.0	1.0	0.0	0.0	0.0	0.0	0.0	0.0	0.0	0.0	0	0	0	0	0
Las Vegas	14.346184549436044	19.353425407753114	15.513595392249792	36.2238309	-115.27893130000001	YMCA of Southern Nevada	NV	3521 N Durango Dr Northwest Las Vegas, NV 89129	5.075173815233827	3.044522437723423	0.0	0	2	0	1	0	0	0.0	0.0	0.0	0.0	0.0	0.0	0.0	1.0	0.0	0.0	0.0	0.0	0.0	0.0	0.0	0.0	0.0	0.0	0.0	0.0	0.0	0.0	0.0	0.0	0.0	0.0	0.0	0	0	0	0	0
Phoenix	32.23984575002775	34.87753133190864	29.687681492505444	33.741316969063895	-112.104057691602	Sonoran Preserve	AZ	Hawk's Nest Trl Phoenix, AZ 85085	4.6443908991413725	2.0794415416798357	0.6931471805599453	0	2	0	1	0	0	0.0	0.0	0.0	0.0	0.0	0.0	0.0	1.0	0.0	0.0	0.0	0.0	0.0	0.0	0.0	0.0	0.0	0.0	0.0	0.0	0.0	0.0	0.0	0.0	0.0	0.0	0.0	0	0	0	0	0
Las Vegas	11.324290704847865	16.580017367059764	12.771897704602074	36.210814299999996	-115.2493637	Health Plan of Nevada	NV	2720 N Tenaya Way Las Vegas, NV 89128	0.0	0.0	0.0	0	2	0	1	0	0	0.0	0.0	0.0	0.0	0.0	0.0	0.0	0.0	0.0	0.0	0.0	0.0	0.0	0.0	0.0	0.0	0.0	0.0	0.0	0.0	0.0	0.0	0.0	0.0	0.0	0.0	0.0	0	0	0	0	0
Phoenix	24.481578138375657	27.79855037529009	22.074009609947623	33.668647299999996	-112.12306770000001	My Greek Corner	AZ	3053 W Agua Fria Freeway Phoenix, AZ 85027	0.0	0.0	0.0	0	2	0	1	0	0	0.0	0.0	0.0	1.0	0.0	0.0	0.0	1.0	1.0	0.0	0.0	0.0	0.0	0.0	1.0	0.0	0.0	0.0	0.0	0.0	0.0	0.0	0.0	0.0	0.0	0.0	0.0	1	0	0	0	0
Madison	3.49745331910791	11.868854323564234	2.8251284878397924	43.05755070000001	-89.42852959999999	Freiburg Gastropub	WI	2616 Monroe St Dudgeon-Monroe Madison, WI 53711	3.6375861597263857	0.6931471805599453	0.0	0	1	0	2	1	0	0.0	0.0	0.0	1.0	1.0	1.0	1.0	1.0	1.0	1.0	0.0	0.0	0.0	0.0	1.0	0.0	0.0	0.0	0.0	0.0	0.0	0.0	0.0	0.0	0.0	0.0	0.0	1	0	0	0	0
Charlotte	6.48966903573174	22.167422127498124	3.1461064226173843	35.174259899999996	-80.80069499999999	Glow Charlotte	NC	233 S Sharon Amity Rd Ste 102 Cotswold Charlotte, NC 28211	0.0	0.6931471805599453	0.0	0	2	0	1	1	0	0.0	0.0	0.0	0.0	0.0	0.0	0.0	0.0	1.0	0.0	0.0	0.0	0.0	0.0	0.0	0.0	0.0	0.0	1.0	0.0	0.0	0.0	0.0	0.0	0.0	0.0	0.0	0	0	0	0	0
Las Vegas	1.024069340296996	7.691549415081844	5.987482396769336	36.158569	-115.131258	Charleston Outlet	NV	1548 E Charleston Blvd Downtown Las Vegas, NV 89104	3.784189633918261	1.791759469228055	0.0	0	2	0	1	0	0	0.0	0.0	0.0	0.0	0.0	0.0	0.0	0.0	1.0	0.0	0.0	0.0	0.0	0.0	0.0	0.0	1.0	0.0	0.0	0.0	0.0	0.0	0.0	0.0	0.0	0.0	0.0	0	0	0	0	0
Las Vegas	17.72858612737731	16.999955677310457	13.969064741410133	36.124201	-115.325356	The Coffee Bean & Tea Leaf	NV	3645 S Town Center Dr Ste 101 South Summerlin Las Vegas, NV 89135	6.20455776256869	3.784189633918261	0.0	0	2	0	0	0	0	0.0	1.0	0.0	0.0	0.0	0.0	0.0	0.0	1.0	0.0	0.0	0.0	0.0	0.0	0.0	0.0	0.0	0.0	1.0	0.0	0.0	0.0	0.0	0.0	0.0	0.0	0.0	0	0	0	0	0
Charlotte	13.956435407297814	34.62089639254842	14.20080994364839	35.129892	-80.944694	Jasmine Buffet	NC	2305 Westinghouse Blvd Ste A Steele Creek Charlotte, NC 28273	4.59511985013459	2.0794415416798357	0.0	0	2	0	1	1	0	0.0	0.0	0.0	1.0	0.0	1.0	1.0	1.0	1.0	1.0	0.0	0.0	0.0	0.0	1.0	0.0	0.0	0.0	0.0	0.0	0.0	0.0	0.0	0.0	0.0	0.0	0.0	1	0	0	0	0
Charlotte	3.1539198092537886	26.097971883533262	4.4903768537002655	35.240733	-80.814418	CenterStage At Noda	NC	2315 N Davidson St NoDa Charlotte, NC 28205	3.044522437723423	0.0	0.0	0	2	0	1	0	0	0.0	0.0	0.0	0.0	0.0	0.0	0.0	0.0	0.0	0.0	0.0	0.0	0.0	0.0	0.0	0.0	0.0	0.0	0.0	0.0	0.0	0.0	0.0	0.0	0.0	0.0	0.0	0	0	0	0	0
Las Vegas	15.265907831926494	10.275048840192849	9.061072274628494	36.0670484	-115.25198770000002	The Z Spot LV	NV	6675 S Tenaya Way Ste 130 Spring Valley Las Vegas, NV 89113	5.799092654460526	2.0794415416798357	0.0	0	2	0	1	0	0	0.0	0.0	0.0	0.0	0.0	0.0	0.0	1.0	0.0	0.0	0.0	0.0	0.0	0.0	0.0	0.0	0.0	0.0	0.0	0.0	0.0	0.0	0.0	0.0	0.0	0.0	0.0	0	0	0	0	0
Las Vegas	17.65268718284534	15.538970923144792	12.970850204544437	36.10009	-115.31347	Hair'z Melinda	NV	9340 W Tropicana Ave Ste 22 Spring Valley Las Vegas, NV 89147	0.0	0.0	0.0	0	2	0	1	0	0	0.0	0.0	0.0	0.0	0.0	0.0	0.0	0.0	1.0	0.0	0.0	0.0	0.0	0.0	0.0	0.0	0.0	0.0	0.0	0.0	0.0	0.0	0.0	0.0	0.0	0.0	0.0	0	0	0	0	0
Phoenix	11.381865957394206	7.6773063575141665	9.64220181034776	33.4962205	-111.96417279999999	One Call Clean Up	AZ	Phoenix, AZ 85018	0.0	0.0	0.0	0	2	0	1	0	0	0.0	0.0	0.0	0.0	0.0	0.0	0.0	0.0	1.0	0.0	0.0	0.0	0.0	0.0	0.0	0.0	0.0	0.0	0.0	0.0	0.0	0.0	0.0	0.0	0.0	0.0	0.0	0	0	0	0	0
Las Vegas	2.5342799683696833	7.379903671127837	4.511963815620803	36.1546583395074	-115.15921899410499	Showtime Tours	NV	1550 S Industrial Rd Downtown Las Vegas, NV 89102	4.110873864173311	3.091042453358316	0.0	0	2	0	1	0	0	0.0	0.0	0.0	0.0	0.0	0.0	0.0	0.0	0.0	0.0	0.0	0.0	0.0	0.0	0.0	0.0	0.0	0.0	0.0	0.0	0.0	0.0	0.0	0.0	0.0	0.0	0.0	0	0	0	0	0
Las Vegas	11.573307313930844	3.846755643772706	5.272447419413435	36.0676361855781	-115.174292148091	Barefoot Sanctuary	NV	6689 S Las Vegas Blvd Southeast Las Vegas, NV 89119	3.7612001156935624	1.3862943611198906	0.0	0	2	0	1	0	0	0.0	0.0	0.0	0.0	0.0	0.0	0.0	1.0	0.0	0.0	0.0	0.0	0.0	0.0	0.0	0.0	0.0	0.0	0.0	0.0	0.0	0.0	0.0	0.0	0.0	0.0	0.0	0	0	0	0	0
Las Vegas	14.8500384599728	9.445735644748773	8.50086072551027	36.0645326	-115.24155400000001	Drago Sisters Bakery	NV	6870 S. Rainbow Blvd Ste 116 Spring Valley Las Vegas, NV 89118	5.926926025970411	3.8501476017100584	0.6931471805599453	0	2	0	1	1	0	0.0	0.0	0.0	0.0	0.0	0.0	0.0	0.0	1.0	0.0	0.0	0.0	0.0	0.0	0.0	0.0	0.0	0.0	1.0	0.0	0.0	0.0	0.0	0.0	0.0	0.0	0.0	0	0	0	0	0
Las Vegas	3.1957992366016863	8.932268375332185	8.261813465148919	36.1630611	-115.1004324	Beat the Heat Solar Screens	NV	3320 Sunrise Ave Suite 109 Downtown Las Vegas, NV 89101	0.0	0.0	0.0	0	2	0	1	0	0	0.0	0.0	0.0	0.0	0.0	0.0	0.0	0.0	0.0	0.0	0.0	0.0	0.0	0.0	0.0	0.0	0.0	0.0	0.0	0.0	0.0	0.0	0.0	0.0	0.0	0.0	0.0	0	0	0	0	0
Madison	8.834613905182984	16.06393861965828	8.01252732841082	43.054723700000004	-89.49761090000001	Mermaid Car Wash	WI	526 Grand Canyon Dr Madison, WI 53719	2.5649493574615367	0.6931471805599453	0.0	0	2	0	1	0	0	0.0	0.0	0.0	0.0	0.0	0.0	0.0	0.0	0.0	0.0	0.0	0.0	0.0	0.0	0.0	0.0	0.0	0.0	0.0	0.0	0.0	0.0	0.0	0.0	0.0	0.0	0.0	0	0	0	0	0
Phoenix	0.21178138139915867	6.383178978979328	3.0078006255126213	33.449799	-112.07471399999999	101 Bistro	AZ	101 N 1st Ave Phoenix, AZ 85003	0.0	0.0	0.0	0	0	0	1	1	0	1.0	1.0	0.0	1.0	0.0	0.0	1.0	1.0	1.0	0.0	0.0	0.0	0.0	0.0	0.0	0.0	0.0	0.0	0.0	0.0	0.0	0.0	0.0	0.0	0.0	0.0	0.0	1	0	0	0	0
Phoenix	14.355559059362488	10.182393246621883	16.1148876665622	33.348162	-111.9819	Naked Pizza	AZ	4747 E Elliot Rd Phoenix, AZ 85044	3.6375861597263857	1.6094379124341003	0.0	2	2	0	0	1	0	1.0	1.0	0.0	0.0	1.0	1.0	0.0	1.0	1.0	0.0	0.0	0.0	0.0	0.0	1.0	0.0	0.0	0.0	1.0	0.0	0.0	0.0	0.0	0.0	0.0	0.0	0.0	1	0	0	0	1
Charlotte	2.629842295815865	24.840036895950472	2.090048654075754	35.2190216625922	-80.81242675253179	The Penguin Drive-In	NC	1921 Commonwealth Ave Charlotte, NC 28205	5.71042701737487	3.9318256327243257	0.0	0	1	0	1	0	2	0.0	0.0	0.0	1.0	1.0	1.0	1.0	1.0	1.0	0.0	1.0	0.0	0.0	0.0	1.0	0.0	1.0	0.0	0.0	0.0	0.0	0.0	0.0	0.0	0.0	1.0	0.0	1	0	0	0	0
Las Vegas	16.38767075018691	14.99545388015733	12.129117918760114	36.1135909	-115.30530690000002	Boston's	NV	9755 W Flamingo Rd Spring Valley Las Vegas, NV 89147	0.0	0.0	0.0	0	2	0	1	1	0	0.0	0.0	0.0	1.0	0.0	0.0	1.0	1.0	1.0	1.0	0.0	0.0	0.0	0.0	1.0	0.0	0.0	0.0	0.0	0.0	0.0	0.0	0.0	0.0	0.0	0.0	0.0	1	0	0	0	0
Charlotte	15.433337132989326	26.148831313531858	13.294062506304037	35.083483223723896	-80.84720097549359	Miguel, A Men's Salon	NC	11121 Carmel Commons Blvd Ste 100 Charlotte, NC 28226	0.0	0.0	0.0	0	2	0	1	1	0	0.0	0.0	0.0	0.0	0.0	0.0	0.0	1.0	1.0	0.0	0.0	0.0	0.0	0.0	0.0	0.0	0.0	0.0	1.0	0.0	0.0	0.0	0.0	0.0	0.0	0.0	0.0	0	0	0	0	0
Las Vegas	17.23076012768753	13.49647803212497	11.629063221470812	36.075571999999994	-115.290218	Paparazzi Grill	NV	9050 W Post Rd Spring Valley Las Vegas, NV 89148	5.117993812416755	2.833213344056216	1.9459101490553132	2	1	0	1	1	0	0.0	0.0	0.0	1.0	1.0	0.0	1.0	1.0	1.0	0.0	0.0	0.0	0.0	0.0	0.0	0.0	0.0	0.0	0.0	0.0	0.0	0.0	0.0	0.0	0.0	0.0	0.0	1	0	0	0	0
Las Vegas	11.075625124334882	10.132667875763039	6.857366767172065	36.123178	-115.24611000000002	Regal Nails	NV	3615 S Rainbow Blvd Chinatown Las Vegas, NV 89103	1.791759469228055	0.6931471805599453	0.0	0	2	0	1	0	0	0.0	0.0	0.0	0.0	0.0	0.0	0.0	0.0	0.0	0.0	0.0	0.0	0.0	0.0	0.0	0.0	0.0	0.0	0.0	0.0	0.0	0.0	0.0	0.0	0.0	0.0	0.0	0	0	0	0	0
Las Vegas	6.856335760805137	9.337363158819814	10.179093228536923	36.1458209	-115.06406670000001	La Costa Del Sol	NV	2208 S Nellis Blvd Sunrise Las Vegas, NV 89104	3.6888794541139363	2.0794415416798357	0.0	1	0	0	1	0	0	0.0	0.0	0.0	1.0	1.0	0.0	1.0	1.0	1.0	0.0	0.0	0.0	0.0	0.0	1.0	0.0	0.0	0.0	0.0	0.0	0.0	0.0	0.0	0.0	0.0	0.0	0.0	1	0	0	0	0
Las Vegas	7.344997636859131	2.011947216077101	1.836539099021516	36.1031106	-115.1564851	Subway	NV	372 E Tropicana Ave Eastside Las Vegas, NV 89169	3.9512437185814275	1.0986122886681098	0.0	0	2	0	1	0	0	0.0	0.0	0.0	1.0	0.0	0.0	0.0	1.0	1.0	0.0	0.0	0.0	0.0	0.0	1.0	0.0	0.0	0.0	0.0	0.0	0.0	0.0	0.0	0.0	0.0	0.0	0.0	1	1	1	0	0
Las Vegas	13.870175409670406	17.124290630558654	13.313111820322433	36.1886104	-115.28748020000002	Las Vegas Farmer's Market	NV	1600 N Rampart Blvd Summerlin Las Vegas, NV 89134	4.919980925828125	0.6931471805599453	0.6931471805599453	0	2	0	1	0	0	0.0	0.0	0.0	0.0	0.0	0.0	0.0	0.0	1.0	0.0	0.0	0.0	0.0	0.0	0.0	0.0	0.0	0.0	1.0	0.0	0.0	0.0	0.0	0.0	0.0	0.0	0.0	0	0	0	0	0
Pittsburgh	7.681699884569682	16.75174716863537	48.81323669524364	40.440003600000004	-80.09091059999999	Sapporo Japanese Steakhouse	PA	4260 Steubenville Pike Pittsburgh, PA 15205	2.302585092994046	0.6931471805599453	0.0	2	1	0	1	2	0	0.0	0.0	0.0	1.0	1.0	1.0	1.0	1.0	1.0	1.0	0.0	0.0	0.0	0.0	1.0	0.0	0.0	0.0	1.0	0.0	0.0	0.0	0.0	0.0	0.0	0.0	0.0	1	0	0	0	0
Las Vegas	7.310387754686248	3.550882759089614	0.7435175583509427	36.1086896	-115.1731693	Starbucks	NV	Crystall Mall at City Ctr 3720 S Las Vegas Blvd The Strip Las Vegas, NV 89518	2.3978952727983707	0.0	0.0	0	2	0	0	1	0	0.0	0.0	0.0	0.0	0.0	0.0	0.0	0.0	1.0	0.0	0.0	0.0	0.0	0.0	0.0	0.0	0.0	0.0	0.0	0.0	0.0	0.0	0.0	0.0	0.0	0.0	0.0	0	0	0	0	0
Charlotte	10.326808243356478	17.340785506338904	7.6785714826924325	35.202569200000006	-80.73021329999999	QuikTrip	NC	6721 Albemarle Rd Eastland Charlotte, NC 28212	1.791759469228055	0.6931471805599453	0.0	0	2	0	1	1	0	0.0	0.0	0.0	0.0	0.0	0.0	0.0	0.0	1.0	0.0	0.0	0.0	0.0	0.0	0.0	0.0	0.0	0.0	0.0	0.0	0.0	0.0	0.0	0.0	0.0	0.0	0.0	0	0	0	0	0
Las Vegas	10.49747643352951	3.967130276365337	7.616158569237238	36.076943	-115.10026599999999	Cycle Gear	NV	6280 S Pecos Rd Southeast Las Vegas, NV 89120	3.7376696182833684	0.6931471805599453	0.0	0	2	0	1	1	0	0.0	0.0	0.0	0.0	0.0	0.0	0.0	0.0	1.0	0.0	0.0	0.0	0.0	0.0	0.0	0.0	0.0	0.0	1.0	0.0	0.0	0.0	0.0	0.0	0.0	0.0	0.0	0	0	0	0	0
Las Vegas	12.192283983224632	3.6821371309414443	6.465597398197842	36.0582877	-115.15442250000001	Las Vegas Rubber Stamp	NV	7235 Bermuda Road Southeast Las Vegas, NV 89119	0.0	0.6931471805599453	0.0	0	2	0	1	0	0	0.0	0.0	0.0	0.0	0.0	0.0	0.0	0.0	0.0	0.0	0.0	0.0	0.0	0.0	0.0	0.0	0.0	0.0	0.0	0.0	0.0	0.0	0.0	0.0	0.0	0.0	0.0	0	0	0	0	0
Edinburgh	4.788079520932436	15.4626079161746	5.515237463778794	55.9520255	-3.1116509	Carlos	EDH	227 Portobello High Street Edinburgh EH15 2AN	0.0	0.0	0.0	0	2	0	1	1	0	1.0	0.0	0.0	0.0	0.0	0.0	0.0	0.0	0.0	0.0	0.0	0.0	0.0	0.0	1.0	0.0	0.0	0.0	0.0	0.0	0.0	0.0	0.0	0.0	0.0	0.0	0.0	1	0	0	0	0
Las Vegas	7.2854222766358046	3.7957544938081154	0.7148700124140953	36.109935313075205	-115.17541598528601	Lucky Cat	NV	3708 S Las Vegas Blvd The Strip Las Vegas, NV 89109	0.0	0.0	0.0	0	2	0	1	0	0	0.0	0.0	0.0	0.0	0.0	0.0	0.0	0.0	0.0	0.0	0.0	0.0	0.0	0.0	0.0	0.0	0.0	0.0	0.0	0.0	0.0	0.0	0.0	0.0	0.0	0.0	0.0	0	0	0	0	0
Edinburgh	1.4266471303699273	11.89247762020123	2.308954838496246	55.9594827	-3.1683103	Razwan	EDH	1D/Norton Pk Edinburgh EH7 5RS	0.0	0.0	0.0	0	2	0	1	0	0	0.0	0.0	0.0	0.0	0.0	0.0	0.0	0.0	0.0	0.0	0.0	0.0	0.0	0.0	0.0	0.0	0.0	0.0	0.0	0.0	0.0	0.0	0.0	0.0	0.0	0.0	0.0	0	0	0	0	0
[truncated: 40,559 more rows]
[truncated: 25 more columns]
